# Supplementary material for: Regio- and stereo-selective decarbonylative alkylative arylation of terminal alkynes with aliphatic aldehydes and arenes via dual C–H bond functionalization
Source: Royal Society of Chemistry journal article supplement (doi:10.1039/c9qo01009b), 2019-01-01

Electronic supplementary information

**Regio- and stereo-selective decarbonylative alkylative arylation of terminal alkynes with aliphatic aldehydes and arenes via dual C-H bond functionalization**

Yong Peng, Feng Zhang, Ting-Ting Qin, Cong-Ling Xu and Luo Yang\*

**Table of Contents**

|                                                                                                                          |    |
|--------------------------------------------------------------------------------------------------------------------------|----|
| I. General information.....                                                                                              | 1  |
| II. Genneral experimental procedure .....                                                                                | 2  |
| III. Condition optimization .....                                                                                        | 2  |
| Table S1. Optimization of the catalysts .....                                                                            | 2  |
| Table S2. Optimization of the temperature.....                                                                           | 3  |
| Table S3. Optimization of the amounts of oxidants .....                                                                  | 3  |
| Table S4. Optimization of the amounts of catalyst.....                                                                   | 4  |
| Table S5. Optimization of the amounts of solvent .....                                                                   | 4  |
| Table S6. Optimization of the time.....                                                                                  | 4  |
| IV. KIE experiments .....                                                                                                | 5  |
| V. DFT calculations .....                                                                                                | 6  |
| VI The assignment of the configuration by NOE .....                                                                      | 7  |
| VII. Spectra data of products <b>4a-4i</b> , <b>5b-5m</b> , <b>6b-6m</b> .....                                           | 9  |
| VIII References .....                                                                                                    | 20 |
| IX Copies of <sup>1</sup> H and <sup>13</sup> C NMR spectra of products <b>4a-4i</b> , <b>5b-5m</b> , <b>6b-6m</b> ..... | 21 |

**I. General information**

Unless otherwise noted, all commercially available compounds were used as purchased without further purification. Dry solvents (toluene, ethyl acetate, dichloromethane, acetonitrile, chlorobenzene, fluorobenzene, trifluoromethyl benzene) were used as commercially available. Thin-layer chromatography (TLC) was performed using E. Merck silica gel 60 F254 precoated plates (0.25 mm) or Sorbent Silica Gel 60 F254 plates. The developed chromatography was analyzed by UV lamp (254 nm). High-resolution mass spectra (HRMS) were obtained from a JEOL JMS-700 instrument (ESI). Melting points are uncorrected. Nuclear magnetic resonance (NMR) spectra were recorded on a Bruker Avance 400 spectrometer at ambient temperature. Chemical shifts for <sup>1</sup>H NMR spectra are reported in parts per million (ppm) from tetramethylsilane with the solvent resonance as the internal standard (chloroform:  $\delta$  7.26 ppm). Chemical shifts for <sup>13</sup>C NMR spectra are reported in parts per million (ppm) from tetramethylsilane with the solvent as the internal standard (CDCl<sub>3</sub>:  $\delta$  77.16 ppm). Data are reported as following: chemical shift, multiplicity (s =

singlet, d = doublet, dd = doublet of doublets, t = triplet, q = quartet, m = multiplet, br = broad signal), coupling constant (Hz), and integration.

The Z/E ratio was determined by GC of reaction mixtures by assuming the Z/E-isomers with the same responses under the FID detector. The ratio of regio-isomers for the products from mono-substituted arenes was determined by <sup>1</sup>H NMR.

## II. General experimental procedure

An oven-dried reaction vessel was successively charged with CuBr<sub>2</sub> (0.05 mmol, 25 mol%), benzene (**3a**, 4 mL), ethyl propiolate (**2a**, 0.2 mmol, 1.0 equiv), pivalaldehyde (**1a**, 0.6 mmol, 3 equiv) and di-*tert*-butyl peroxide (DTBP, 0.6 mmol, 3 equiv). The vessel was sealed and stirred at 110 °C (oil bath temperature) for 24 h. Afterwards the resulting mixture was cooled to room temperature, the solvent was removed in vacuum. The residue was purified by column chromatography on silica gel with a mixture of dichloromethane/petroleum ether (1:3) as eluent to give products **4a**.

## III. Condition optimization

Table S1. Optimization of the catalyst<sup>a</sup>

| <b>1a</b><br>3 eq | <b>2a</b><br>0.2 mmol   | <b>3a</b><br>1 mL     |
|-------------------|-------------------------|-----------------------|
| <b>4a</b>         |                         |                       |
| entry             | Cat. (mol%)             | Yield[%] <sup>b</sup> |
| 1                 | --                      | 10                    |
| 2                 | Fe(OAc) <sub>2</sub>    | 10                    |
| 3                 | Fe(acac) <sub>2</sub>   | 7                     |
| 4                 | FeCl <sub>2</sub>       | 11                    |
| 5                 | CoCl <sub>2</sub>       | 12                    |
| 6                 | Co(OAc) <sub>2</sub>    | 8                     |
| 7                 | Co(acac) <sub>2</sub>   | 9                     |
| 8                 | NiCl <sub>2</sub>       | 8                     |
| 9                 | Ni(acac) <sub>2</sub>   | 8                     |
| 10                | Ni(OAc) <sub>2</sub>    | 10                    |
| 11                | CuBr                    | 20                    |
| 12                | Cu(OAc) <sub>2</sub>    | 13                    |
| 13                | Cu(acac) <sub>2</sub>   | 4                     |
| <b>14</b>         | <b>CuBr<sub>2</sub></b> | <b>25</b>             |
| 15                | Cu <sub>2</sub> O       | 17                    |

|    |                                     |    |
|----|-------------------------------------|----|
| 16 | CuCl                                | 19 |
| 17 | CuF <sub>2</sub> ·2H <sub>2</sub> O | 14 |
| 18 | CuCN                                | 11 |
| 19 | CuSO <sub>4</sub>                   | 8  |

<sup>a</sup> Reaction conditions: **2a** (0.2 mmol, 1.0 equiv), **1a** (0.6 mmol, 3.0 equiv), **3a** (1 mL), DTBP (0.6 mmol, 3.0 equiv), Cat. (0.01 mmol, 5 mol%), stirred at 120 °C for 24 h under air. <sup>b</sup> Isolated yields.

**Table S2. Optimization of the temperature<sup>a</sup>**

$\text{1a (3 eq)} + \text{2a (0.2 mmol)} + \text{3a (1 mL)} \xrightarrow[\text{Temp. 24h}]{\text{CuBr}_2 (5 \text{ mol\%}), \text{DTBP (3 eq)}} \text{4a}$

| entry | Temp. (°C) | Yield[%] <sup>b</sup> |
|-------|------------|-----------------------|
| 1     | 80         | 19                    |
| 2     | 90         | 31                    |
| 3     | 100        | 42                    |
| 4     | 110        | 49                    |
| 5     | 120        | 25                    |
| 6     | 130        | 17                    |

<sup>a</sup> Reaction conditions: **2a** (0.2 mmol, 1.0 equiv), **1a** (0.6 mmol, 3.0 equiv), **3a** (1 mL), DTBP (0.6 mmol, 3.0 equiv), CuBr<sub>2</sub> (0.01 mmol, 5 mol%), for 24 h under air. <sup>b</sup> Isolated yields.

**Table S3. Optimization of the amounts of oxidants<sup>a</sup>**

$\text{1a (3 eq)} + \text{2a (0.2 mmol)} + \text{3a (1 mL)} \xrightarrow[110\text{ }^\circ\text{C, 24h}]{\text{CuBr (5 mol\%)}, \text{DTBP (X eq)}} \text{4a}$

| entry | [O] (X equiv)                 | Yield[%] <sup>b</sup> |
|-------|-------------------------------|-----------------------|
| 1     | TBHP in water                 | 17                    |
| 2     | TBHP in decane                | 0                     |
| 3     | H <sub>2</sub> O <sub>2</sub> | 0                     |
| 4     | DTBP (3 eq)                   | 49                    |
| 5     | DTBP (2 eq)                   | 28                    |
| 6     | DTBP (4 eq)                   | 41                    |

<sup>a</sup> Reaction conditions: **2a** (0.2 mmol, 1.0 equiv), **1a** (0.6 mmol, 3.0 equiv), **3a** (1 mL), DTBP (X equiv), CuBr<sub>2</sub> (0.01 mmol, 5 mol%), stirred at 120 °C for 24 h under air. <sup>b</sup> Isolated yields.

**Table S4. Optimization of the amounts of catalysts <sup>a</sup>**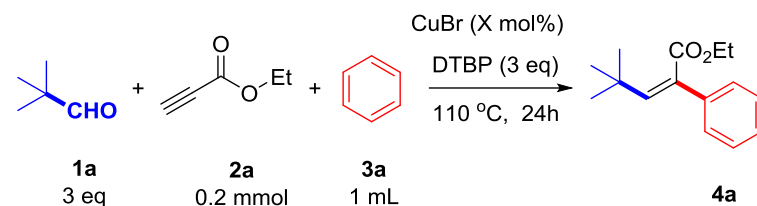

| entry | CuBr <sub>2</sub> (X %) | Yield[%] <sup>b</sup> |
|-------|-------------------------|-----------------------|
| 1     | 5                       | 49                    |
| 2     | 10                      | 52                    |
| 3     | 15                      | 55                    |
| 4     | 20                      | 60                    |
| 5     | 25                      | 76                    |
| 6     | 30                      | 48                    |

<sup>a</sup> Reaction conditions: **2a** (0.2 mmol, 1.0 equiv), **1a** (0.6 mmol, 3.0 equiv), **3a** (1 mL), DTBP (0.6 mmol, 3.0 equiv), CuBr<sub>2</sub> (X %), stirred at 120 °C for 24 h under air. <sup>b</sup> Isolated yields.

**Table S5. Optimization of the amounts of solvent<sup>a</sup>**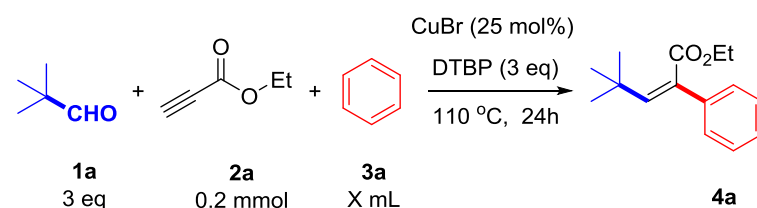

| entry | Sol (X mL) | Yield[%] <sup>b</sup> |
|-------|------------|-----------------------|
| 1     | 1          | 76                    |
| 2     | 2          | 78                    |
| 3     | 3          | 83                    |
| 4     | 4          | 88                    |

<sup>a</sup> Reaction conditions: **2a** (0.2 mmol, 1.0 equiv), **1a** (0.6 mmol, 3.0 equiv), **3a** (X mL), DTBP (0.6 mmol, 3.0 equiv), CuBr<sub>2</sub> (25 %), stirred at 120 °C for 24 h under air. <sup>b</sup> Isolated yields.

**Table S6. Optimization of the time<sup>a</sup>**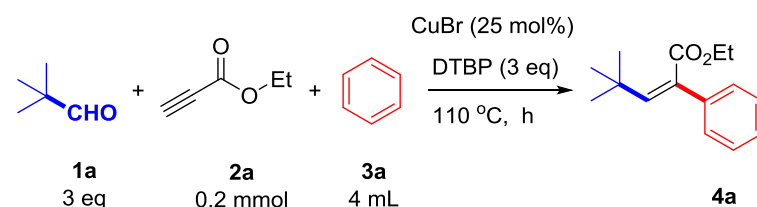

| entry | h  | Yield[%] <sup>b</sup> |
|-------|----|-----------------------|
| 1     | 12 | 57                    |
| 2     | 16 | 74                    |

|   |    |    |
|---|----|----|
| 3 | 20 | 84 |
| 4 | 24 | 88 |

<sup>a</sup> Reaction conditions: **2a** (0.2 mmol, 1.0 equiv), **1a** (3 equiv), **3a** (4 mL), DTBP (0.6 mmol, 3.0 equiv), CuBr<sub>2</sub> (25 %), stirred at 120 °C under air. <sup>b</sup> Isolated yields.

#### IV. KIE experiments

##### (a) Synthesis of 2-phenylacetaldehyde-D<sup>1</sup> (**D<sup>1</sup>-1f**)

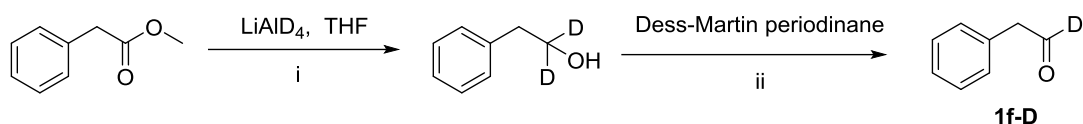

(i) To a stirred suspension of LiAlD<sub>4</sub> (0.23 g, 6 mmol) in dry THF (3 ml) was added dropwise a solution of methyl methyl 2-phenylacetate (0.75 g, 5 mmol) in dry THF (10 ml) at 0 °C. After 1.5 h at room temperature, the reaction was quenched by addition with 40% KOH at 0 °C. The precipitate was filtered off and washed with ether. The combined filtrates were evaporated and the residue was purified by column chromatography on silica gel (hexane : ethyl acetate = 10 : 1) to give 2-phenylethan-1-ol-D<sup>2</sup> (0.52 g, 85%) as a yellow oil.

(ii) Dess-Martin periodinane (2.12 g, 5 mmol) was added to a solution of above 2-phenylethan-1-ol-D<sup>2</sup> (4.3 mmol) in 15 mL of CH<sub>2</sub>Cl<sub>2</sub>. The reaction mixture was stirred until the alcohol was no longer detectable (TLC). The mixture was suction filtered and concentrated under reduced pressure. The residue was further purified by column chromatography on silica gel to give 2-phenylacetaldehyde-D<sup>1</sup> (**1f-D**) (0.49 g, 95%) as a colorless oil.

##### (b) Competing experiments

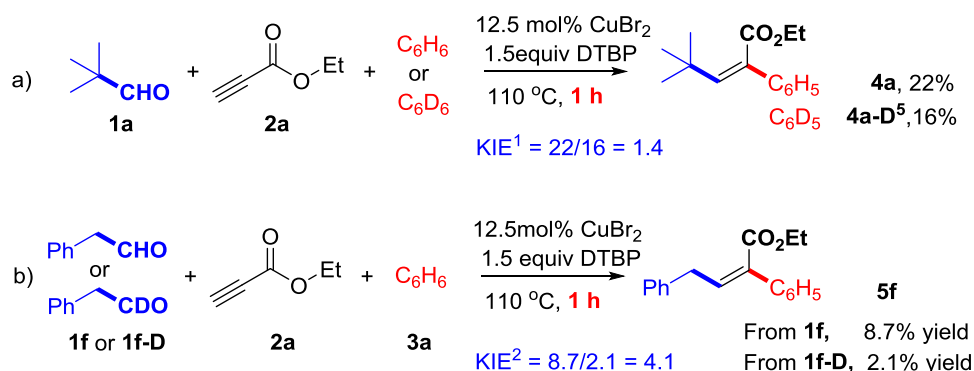

<sup>a</sup> Two microwave reaction vessels was separately charged with charged with CuBr<sub>2</sub> (0.025 mmol, 12.5 mmol%), benzene (**3a**, 2 mL), (or benzene **D<sup>6</sup>-3a**) ethyl propiolate (**2a**, 0.1 mmol, 1.0 equiv), pivalaldehyde (**1a**, 0.3 mmol, 1.5 equiv) and di-*tert*-butyl peroxide (DTBP, 0.3 mmol, 1.5 equiv). The vessel was sealed and stirred at 110 °C (oil bath temperature) for 1 h. Yield of **4a** and **4a-D<sup>5</sup>** was detected by GC.

<sup>b</sup> Two microwave reaction vessels was separately charged with charged with CuBr<sub>2</sub> (0.025 mmol, 12.5 mol%), benzene (**3a**, 2 mL), ethyl propiolate (**2a**, 0.1 mmol, 1.0 equiv), 2-phenylacetaldehyde (**1f**, 0.3 mmol, 1.5 equiv) (or 2-phenylacetaldehyde **D<sup>1</sup>-1f**) and di-*tert*-butyl peroxide (DTBP, 0.3 mmol, 1.5 equiv). The vessel was sealed and stirred at 110 °C (oil bath temperature) for 1 h. Yield

of **5f** was detected by GC.

(c)

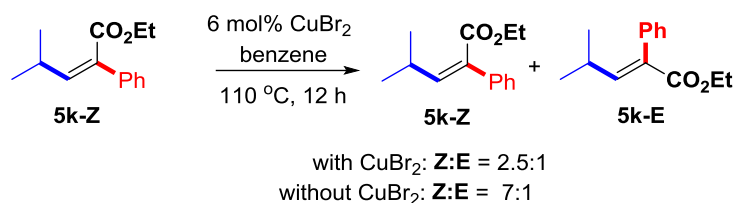

<sup>a</sup> A microwave reaction vessels was separately charged with charged with CuBr<sub>2</sub> (0.006 mmol, 6 mmol%), benzene (**3a**, 1 mL) and ethyl (Z)-4-methyl-2-phenylpent-2-enoate (**5k-Z**, 0.05 mmol). The vessel was sealed and stirred at 110 °C (oil bath temperature) for 12 h. Yield of **5k-Z** and **5k-E** was detected by GC.

<sup>b</sup> A microwave reaction vessels was separately charged with charged with benzene (**3a**, 1 mL) and ethyl (Z)-4-methyl-2-phenylpent-2-enoate (**5k-Z**, 0.05 mmol). The vessel was sealed and stirred at 110 °C (oil bath temperature) for 12 h. Yield of **5k-Z** and **5k-E** was detected by GC.

## V. DFT calculations

### Computational Details

All DFT calculations were carried out with Gaussian03 quantum chemical package.<sup>1</sup> The geometry optimizations were performed with B3LYP functional and the 6-311+G(d) basis set. For those structures having various conformations, the most stable conformer was searched and utilized. Vibrational frequency calculations were carried out at the same level of theory as the geometry optimizations. Free energy changes were calculated based on the optimized gas phase structures.

**The calculation out-put files and coordinates were included in the separated zipped file.**

### References

- Gaussian 03, Revision B.05,  
M. J. Frisch, G. W. Trucks, H. B. Schlegel, G. E. Scuseria,  
M. A. Robb, J. R. Cheeseman, J. A. Montgomery, Jr., T. Vreven,  
K. N. Kudin, J. C. Burant, J. M. Millam, S. S. Iyengar, J. Tomasi,  
V. Barone, B. Mennucci, M. Cossi, G. Scalmani, N. Rega,  
G. A. Petersson, H. Nakatsuji, M. Hada, M. Ehara, K. Toyota,  
R. Fukuda, J. Hasegawa, M. Ishida, T. Nakajima, Y. Honda, O. Kitao,  
H. Nakai, M. Klene, X. Li, J. E. Knox, H. P. Hratchian, J. B. Cross,  
C. Adamo, J. Jaramillo, R. Gomperts, R. E. Stratmann, O. Yazyev,  
A. J. Austin, R. Cammi, C. Pomelli, J. W. Ochterski, P. Y. Ayala,  
K. Morokuma, G. A. Voth, P. Salvador, J. J. Dannenberg,  
V. G. Zakrzewski, S. Dapprich, A. D. Daniels, M. C. Strain,  
O. Farkas, D. K. Malick, A. D. Rabuck, K. Raghavachari,  
J. B. Foresman, J. V. Ortiz, Q. Cui, A. G. Baboul, S. Clifford,  
J. Cioslowski, B. B. Stefanov, G. Liu, A. Liashenko, P. Piskorz,  
I. Komaromi, R. L. Martin, D. J. Fox, T. Keith, M. A. Al-Laham,  
C. Y. Peng, A. Nanayakkara, M. Challacombe, P. M. W. Gill,  
B. Johnson, W. Chen, M. W. Wong, C. Gonzalez, and J. A. Pople,  
Gaussian, Inc., Pittsburgh PA, 2003.

## VI. The assignment of the configuration by NOE

(a) ethyl (Z)-4,4-dimethyl-2-phenylpent-2-enoat (4a)

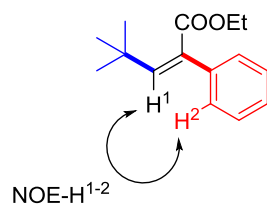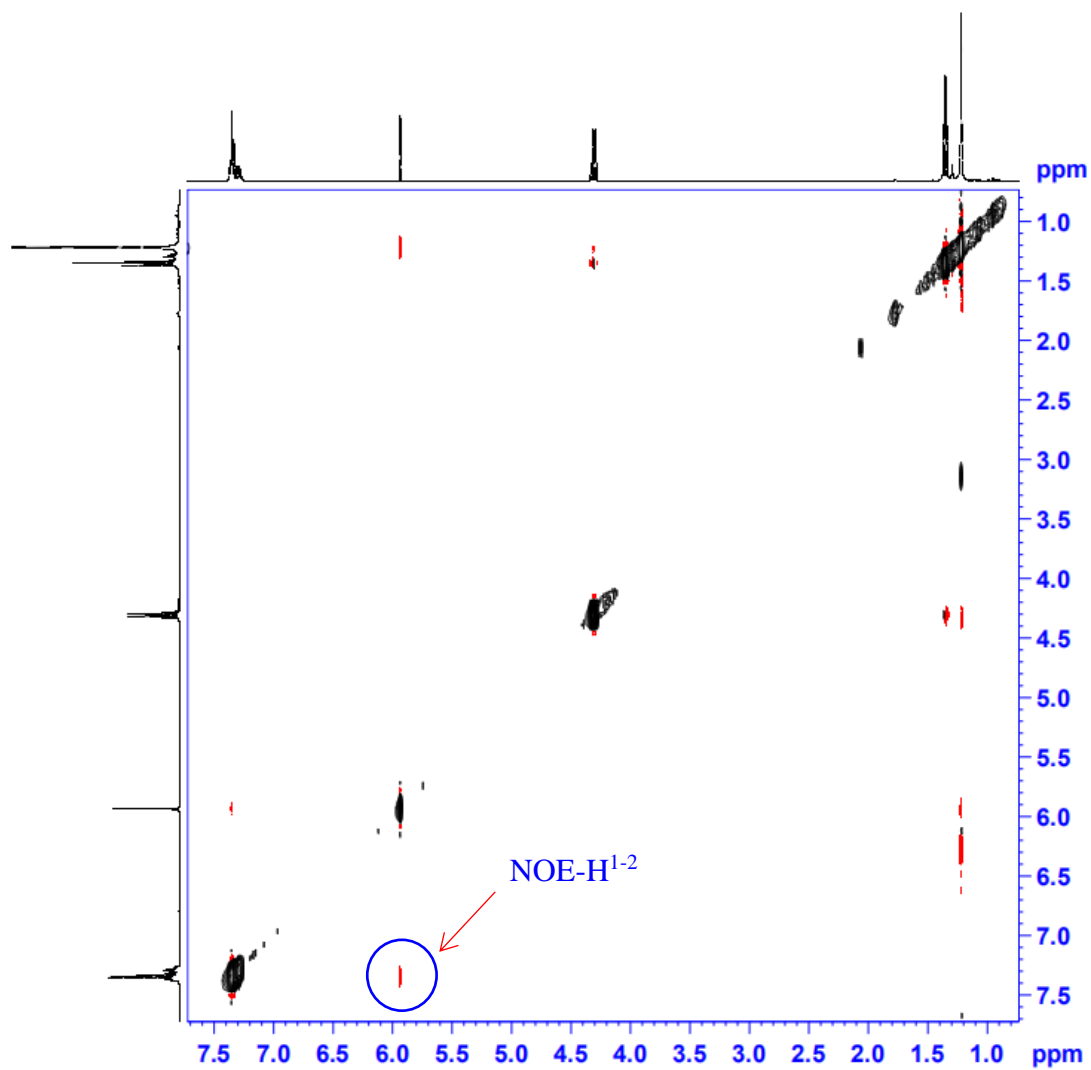

(b ) ethyl (Z)-2-mesityl-4,4-dimethylpent-2-enoate (6g)

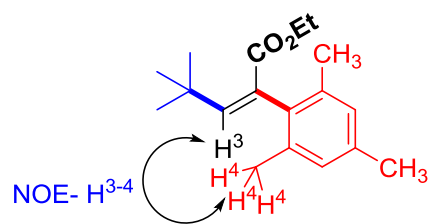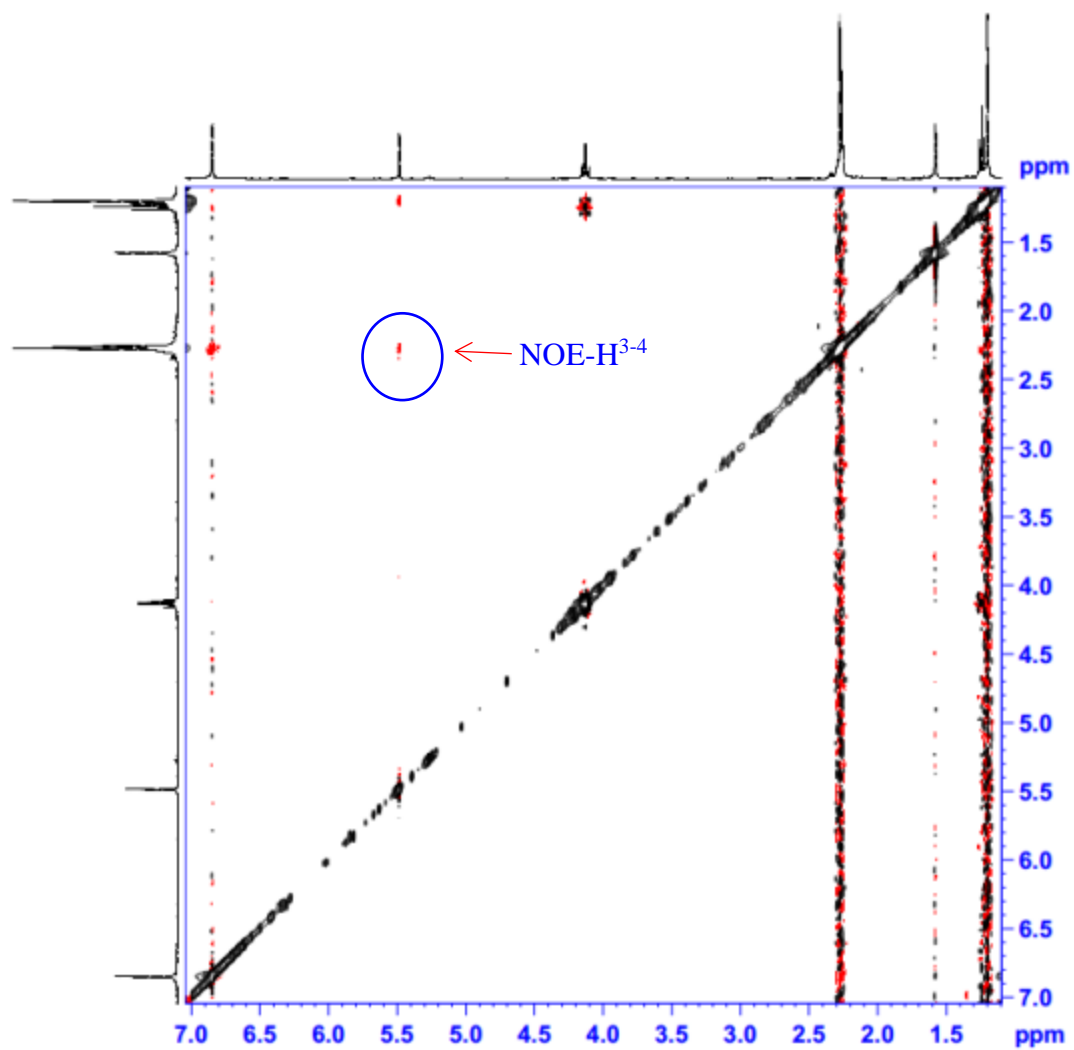



## VII Spectra data of products 4a-4i, 5b-5m, 6b-6m

### (4a) ethyl (Z)-4,4-dimethyl-2-phenylpent-2-enoate<sup>1</sup>

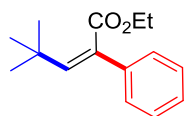

The title compound was prepared according to the general procedure described above by the reaction between ethyl propiolate (**2a**) with pivalaldehyde (**1a**) and benzene (**3a**), and purified by flash column chromatography as colorless oil (40.8 mg, 88%).

<sup>1</sup>H NMR (400 MHz, CDCl<sub>3</sub>)  $\delta$  7.34 – 7.25 (m, 5H), 5.90 (s, 1H), 4.27 (q,  $J$  = 7.2 Hz, 2H), 1.32 (t,  $J$  = 7.2 Hz, 3H), 1.18 (s, 9H). <sup>13</sup>C NMR (100 MHz, CDCl<sub>3</sub>)  $\delta$  170.02, 142.45, 138.08, 132.29, 128.57, 127.68, 126.09, 61.05, 33.98, 29.86, 14.15. IR (cm<sup>-1</sup>): 3083, 3059, 2905, 2870, 1727, 1540, 751.

### (4b) benzyl (Z)-4,4-dimethyl-2-phenylpent-2-enoate

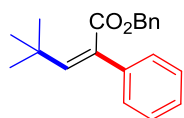

The title compound was prepared according to the general procedure described above by the reaction between benzyl propiolate (**2b**) with pivalaldehyde (**1a**) and benzene (**3a**), and purified by flash column chromatography as yellow oil (50.6 mg, 86%).

<sup>1</sup>H NMR (400 MHz, CDCl<sub>3</sub>)  $\delta$  7.36 – 7.31 (m, 5H), 7.29 – 7.25 (m, 5H), 5.92 (s, 1H), 5.25 (s, 2H), 1.15 (s, 9H). <sup>13</sup>C NMR (100 MHz, CDCl<sub>3</sub>)  $\delta$  169.85, 142.94, 137.93, 135.37, 131.88, 128.78, 128.64, 128.60, 128.46, 127.75, 126.18, 67.06, 34.05, 29.88. IR (cm<sup>-1</sup>): 3096, 3054, 2936, 2867, 1776, 1540, 694. HRMS: calcd. for C<sub>20</sub>H<sub>22</sub>NaO<sub>2</sub><sup>+</sup> [M+Na]<sup>+</sup>: 317.1512; Found: 317.1497.

### (4c) phenyl (Z)-4,4-dimethyl-2-phenylpent-2-enoate

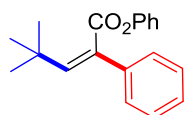

The title compound was prepared according to the general procedure described above by the reaction between phenyl propiolate (**2c**) with pivalaldehyde (**1a**) and benzene (**3a**), and purified by flash column chromatography as yellow oil (60 mg, 91%).

<sup>1</sup>H NMR (400 MHz, CDCl<sub>3</sub>)  $\delta$  7.46 – 7.30 (m, 8H), 7.16 (d,  $J$  = 8.0 Hz, 2H), 6.05 (s, 1H), 1.29 (s, 9H). <sup>13</sup>C NMR (100 MHz, CDCl<sub>3</sub>)  $\delta$  168.17, 150.69, 144.12, 137.91, 131.65, 129.66, 128.82, 128.00, 126.36, 126.17, 121.52, 34.33, 30.06. IR (cm<sup>-1</sup>): 3089, 3066, 2954, 2843, 1647, 1558, 747. HRMS: calcd. for C<sub>19</sub>H<sub>20</sub>NaO<sub>2</sub><sup>+</sup> [M+Na]<sup>+</sup>: 303.1356; Found: 303.1337

### (4d) naphthalen-2-yl (Z)-4,4-dimethyl-2-phenylpent-2-enoate

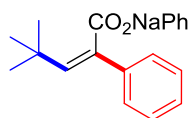

The title compound was prepared according to the general procedure described above by the reaction between naphthalen-2-yl propiolate (**2d**) with pivalaldehyde (**1a**) and benzene (**3a**), and purified by flash column chromatography as yellow oil (52.8 mg, 80%).

$^1\text{H}$  NMR (400 MHz,  $\text{CDCl}_3$ )  $\delta$  7.89 – 7.80 (m, 5H), 7.49 (d,  $J$  = 8.0 Hz, 4H), 7.41 (t,  $J$  = 8.0 Hz, 2H), 7.30 (dd,  $J$  = 8.0, 1.8 Hz, 1H), 6.08 (s, 1H), 1.33 (s, 9H).  $^{13}\text{C}$  NMR (100 MHz,  $\text{CDCl}_3$ )  $\delta$  168.31, 159.20, 148.33, 144.29, 137.94, 133.88, 131.67, 131.59, 130.35, 129.64, 128.87, 128.57, 128.05, 127.92, 127.83, 126.75, 126.41, 125.94, 124.70, 122.00, 120.96, 118.49, 34.38, 30.10. IR ( $\text{cm}^{-1}$ ): 3362, 3209, 2937, 2844, 1646, 1570, 745. HRMS: calcd. for  $\text{C}_{19}\text{H}_{20}\text{Na}_2\text{O}_2^+$   $[\text{M}+\text{Na}]^+$ : 353.1512; Found: 353.1517.

**(4e) (Z) -4,4-dimethyl-N,2-diphenylpent-2-enamide<sup>2</sup>**

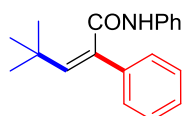

The title compound was prepared according to the general procedure described above by the reaction between N-phenyl-O-propioloylhydroxylamine (**2e**) with pivalaldehyde (**1a**) and benzene (**3a**), and purified by flash column chromatography as yellow solid (45.2 mg, 81%).

$^1\text{H}$  NMR (400 MHz,  $\text{CDCl}_3$ )  $\delta$  7.57 – 7.55 (m, 2H), 7.46 – 7.44 (m, 2H), 7.36 – 7.28 (m, 5H), 7.26 (s, 1H), 7.14 (t,  $J$  = 6.0 Hz, 1H), 6.00 (s, 1H), 1.25 (s, 9H).  $^{13}\text{C}$  NMR (100 MHz,  $\text{CDCl}_3$ )  $\delta$  168.11, 142.32, 138.06, 137.72, 135.34, 129.25, 128.84, 127.95, 126.10, 124.69, 119.87, 34.40, 30.20. IR ( $\text{cm}^{-1}$ ): 3061, 3043, 2906, 2748, 1751, 1615, 748. Melting point: 158-162 °C.

**(4f) (Z)-O-(4,4-dimethyl-2-phenylpent-2-enoyl)hydroxylamine**

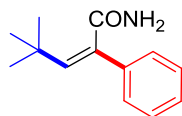

The title compound was prepared according to the general procedure described above by the reaction between propiolamide (**2f**) with pivalaldehyde (**1a**) and benzene (**3a**), and purified by flash column chromatography as yellow solid (21.9 mg, 50%).

$^1\text{H}$  NMR (400 MHz,  $\text{CDCl}_3$ )  $\delta$  7.33 – 7.24 (m, 5H), 6.18 (s, 1H), 6.05 (s, 1H), 5.91 (s, 1H), 1.18 (s, 9H).  $^{13}\text{C}$  NMR (100 MHz,  $\text{CDCl}_3$ )  $\delta$  173.50, 142.47, 137.95, 132.10, 128.56, 127.67, 126.01, 33.94, 29.78. IR ( $\text{cm}^{-1}$ ): 3297, 3060, 2958, 2870, 1727, 1635, 1478, 754. HRMS: calcd. for  $\text{C}_{13}\text{H}_{17}\text{NNaO}^+$   $[\text{M}+\text{Na}]^+$ : 226.1202; Found: 226.1229.

**(4g) cinnamyl (Z)-4,4-dimethyl-2-phenylpent-2-enoate**

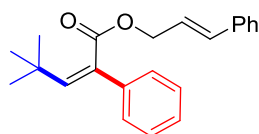

The title compound was prepared according to the general procedure described above by the reaction between cinnamyl propiolate (**2g**) with pivalaldehyde (**1a**) and benzene (**3a**), and purified by flash column chromatography as yellow oil (33.3 mg, 52%).

$^1\text{H}$  NMR (400 MHz,  $\text{CDCl}_3$ )  $\delta$  7.39 (t,  $J = 6.4$  Hz, 5H), 7.33 (t,  $J = 7.2$  Hz, 5H), 6.70 (d,  $J = 15.6$  Hz, 1H), 6.30 – 6.26 (m, 1H), 5.93 (s, 1H), 4.85 (t,  $J = 6.4$  Hz, 2H), 1.23 (s, 9H).  $^{13}\text{C}$  NMR (100 MHz,  $\text{CDCl}_3$ )  $\delta$  174.92, 152.65, 143.79, 137.92, 135.98, 135.73, 128.79, 128.67, 128.49, 127.89, 126.86, 126.48, 121.74, 66.91, 34.05, 29.86. IR ( $\text{cm}^{-1}$ ): 3297, 3092, 2976, 2861, 1703, 1647, 755. HRMS: calcd. for  $\text{C}_{22}\text{H}_{24}\text{NaO}_2^+$  [ $\text{M}+\text{Na}$ ] $^+$ : 343.1669; Found: 343.1670.

**(4h) (Z)-4,4-dimethyl-2-phenylpent-2-en-1-yl acetate**

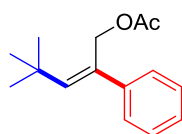

The title compound was prepared according to the general procedure described above by the reaction between prop-2-yn-1-yl acetate (**2h**) with pivalaldehyde (**1a**) and benzene (**3a**), and purified by flash column chromatography as colorless oil (33.9 mg, 73%).

$^1\text{H}$  NMR (400 MHz,  $\text{CDCl}_3$ )  $\delta$  7.33 – 7.24 (m, 5H), 5.98 (s, 1H), 5.10 (s, 2H), 2.00 (s, 3H), 1.23 (s, 9H).  $^{13}\text{C}$  NMR (100 MHz,  $\text{CDCl}_3$ )  $\delta$  171.28, 145.94, 142.58, 133.43, 128.36, 127.08, 126.56, 61.58, 33.56, 31.53, 21.15. IR ( $\text{cm}^{-1}$ ): 3104, 3063, 2978, 2863, 1699, 1487, 756. HRMS: calcd. for  $\text{C}_{14}\text{H}_{18}\text{Na}^+$  [ $\text{M}+\text{Na}$ ] $^+$ : 255.1356; Found: 255.1341.

**(4i) (Z)-(1-cyclopropyl-3,3-dimethylbut-1-en-1-yl)benzene**

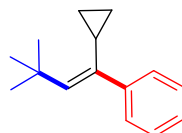

The title compound was prepared according to the general procedure described above by the reaction between ethynylcyclopropane (**2i**) with pivalaldehyde (**1a**) and benzene (**3a**), and purified by flash column chromatography as yellow oil (24 mg, 60%).

$^1\text{H}$  NMR (400 MHz,  $\text{CDCl}_3$ )  $\delta$  7.30 – 7.08 (m, 5H), 5.23 – 5.10 (m, 1H), 2.37 – 2.27 (m, 1H), 1.25 (s, 2H), 1.11 (s, 2H), 1.01 (s, 9H).  $^{13}\text{C}$  NMR (100 MHz,  $\text{CDCl}_3$ )  $\delta$  144.44, 137.87, 133.79, 128.42, 127.61, 127.07, 36.35, 30.22, 20.49, 14.41, 12.08. IR ( $\text{cm}^{-1}$ ): 3185, 3073, 2988, 2813, 1699, 1487, 756. HRMS: calcd. for  $\text{C}_{14}\text{H}_{18}\text{Na}^+$  [ $\text{M}+\text{Na}$ ] $^+$ : 208.1222; Found: 208.1230.

**(5b) ethyl (Z)-4-methyl-2-phenylhex-2-enoate**

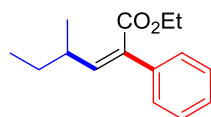

The title compound was prepared according to the general procedure described above by the reaction between ethyl propiolate (**2a**) with 2-methylbutanal (**1b**) and benzene (**3a**), and purified by flash column chromatography as colorless oil (35.7 mg, 77%).

$^1\text{H}$  NMR (400 MHz,  $\text{CDCl}_3$ )  $\delta$  7.33 – 7.27 (m, 5H), 5.91 (d,  $J$  = 10.4 Hz, 1H), 4.29 (q,  $J$  = 7.2 Hz, 2H), 2.75 – 2.64 (m, 1H), 1.49 – 1.37 (m, 2H), 1.32 (t,  $J$  = 7.2 Hz, 3H), 1.08 (d,  $J$  = 6.4 Hz, 3H), 0.92 (t,  $J$  = 7.6 Hz, 3H).  $^{13}\text{C}$  NMR (100 MHz,  $\text{CDCl}_3$ )  $\delta$  168.72, 144.44, 137.87, 133.79, 128.42, 127.61, 127.07, 77.48, 77.16, 76.84, 60.84, 36.35, 30.22, 20.49, 14.41, 12.08. IR ( $\text{cm}^{-1}$ ): 3143, 3069, 2965, 2870, 1697, 1560, 755. HRMS: calcd. for  $\text{C}_{15}\text{H}_{20}\text{NaO}_2^+$   $[\text{M}+\text{Na}]^+$ : 255.1356; Found: 255.1347.

**(5c) ethyl (Z)-4-ethyl-2-phenylhex-2-enoate**

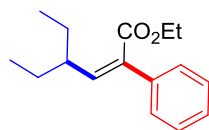

The title compound was prepared according to the general procedure described above by the reaction between ethyl propiolate (**2a**) with 2-ethylbutanal (**1c**) and benzene (**3a**), and purified by flash column chromatography as colorless oil (38.4 mg, 78%).

$^1\text{H}$  NMR (400 MHz,  $\text{CDCl}_3$ )  $\delta$  7.34 – 7.27 (m, 5H), 5.85 (d,  $J$  = 10.4 Hz, 1H), 4.29 (q,  $J$  = 7.2 Hz, 2H), 2.56 – 2.47 (m, 1H), 1.57 – 1.50 (m, 3H), 1.32 (t,  $J$  = 7.0 Hz, 4H), 0.91 (t,  $J$  = 7.6 Hz, 6H).  $^{13}\text{C}$  NMR (100 MHz,  $\text{CDCl}_3$ )  $\delta$  168.82, 143.04, 137.95, 135.28, 128.44, 127.61, 127.02, 60.78, 43.36, 28.15, 14.42, 12.02. IR ( $\text{cm}^{-1}$ ): 3179, 3086, 2929, 2874, 1722, 1643, 755. HRMS: calcd. for  $\text{C}_{15}\text{H}_{19}\text{NaO}_2^+$   $[\text{M}+\text{Na}]^+$ : 269.1512; Found: 269.1484.

**(5d) ethyl (Z)-4-ethyl-2-phenyloct-2-enoate**

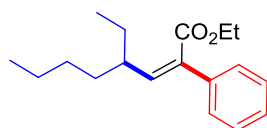

The title compound was prepared according to the general procedure described above by the reaction between ethyl propiolate (**2a**) with 2-ethylhexanal (**1d**) and benzene (**3a**), and purified by flash column chromatography as colorless oil (41.6 mg, 76%).

$^1\text{H}$  NMR (400 MHz,  $\text{CDCl}_3$ )  $\delta$  7.34 – 7.28 (m, 5H), 5.85 (dd,  $J$  = 10.4, 0.8 Hz, 1H), 4.31 – 4.26 (m, 2H), 2.62 – 2.55 (m, 1H), 1.55 – 1.48 (m, 2H), 1.29 (dd,  $J$  = 7.2, 6 Hz, 9H), 0.92 – 0.89 (m, 6H).  $^{13}\text{C}$  NMR (100 MHz,  $\text{CDCl}_3$ )  $\delta$  168.80, 143.39, 138.02, 134.98, 128.44, 127.60, 127.05, 60.78, 41.68, 35.12, 29.75, 28.50, 23.02, 14.42, 14.21, 11.98. IR ( $\text{cm}^{-1}$ ): 3085, 3029, 2928, 2873, 1722, 1634, 748. HRMS: calcd. for  $\text{C}_{17}\text{H}_{23}\text{NaO}_2^+$   $[\text{M}+\text{Na}]^+$ : 297.1825; Found: 297.1803.

**(5e) ethyl (Z)-2,4-diphenylpent-2-enoate<sup>3</sup>**

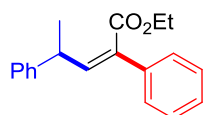

The title compound was prepared according to the general procedure described above by the reaction between ethyl propiolate (**2a**) with 2-phenylpropanal (**1e**) and benzene (**3a**), and purified by flash column chromatography as yellow oil (41.4 mg, 74%).

$^1\text{H}$  NMR (400 MHz,  $\text{CDCl}_3$ )  $\delta$  7.34 – 7.28 (m, 10H), 6.19 (d,  $J$  = 10.4 Hz, 1H), 4.32 (q,  $J$  = 7.2 Hz, 2H), 4.21 – 4.14 (m, 1H), 1.48 (d,  $J$  = 6.8 Hz, 3H), 1.32 (t,  $J$  = 7.2 Hz, 3H).  $^{13}\text{C}$  NMR (100 MHz,  $\text{CDCl}_3$ )  $\delta$  168.39, 144.74, 142.73, 137.64, 133.27, 128.72, 128.42, 127.80, 127.27, 127.19, 126.55, 61.04, 39.66, 21.33, 14.41. IR ( $\text{cm}^{-1}$ ): 3244, 3085, 3029, 2928, 2873, 1722, 748.

**(5f) ethyl (Z)-2,4-diphenylbut-2-enoate<sup>4</sup>**

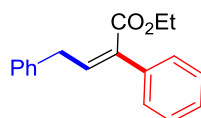

The title compound was prepared according to the general procedure described above by the reaction between ethyl propiolate (**2a**) with 2-phenylacetaldehyde (**1f**) and benzene (**3a**), and purified by flash column chromatography as colorless oil (28.7 mg, 54%).

$^1\text{H}$  NMR (400 MHz,  $\text{CDCl}_3$ )  $\delta$  7.35 – 7.27 (m, 10H), 6.29 (t,  $J$  = 7.6 Hz, 1H), 4.34 (q,  $J$  = 7.2 Hz, 2H), 3.76 (t,  $J$  = 8.6 Hz, 2H), 1.34 (t,  $J$  = 7.2 Hz, 3H).  $^{13}\text{C}$  NMR (100 MHz,  $\text{CDCl}_3$ )  $\delta$  168.32, 147.42, 137.18, 129.15, 128.93, 128.80, 128.75, 128.43, 127.84, 127.27, 126.52, 61.09, 36.41, 14.42. IR ( $\text{cm}^{-1}$ ): 3125, 3112, 2948, 2893, 1732, 1635, 755.

**(5g) ethyl (Z)-5-methyl-2-phenylhex-2-enoate**

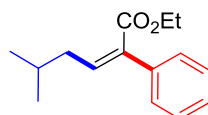

The title compound was prepared according to the general procedure described above by the reaction between ethyl propiolate (**2a**) with 3-methylbutanal (**1g**) and benzene (**3a**), and purified by flash column chromatography as colorless oil (29.2 mg, 63%).

$^1\text{H}$  NMR (400 MHz,  $\text{CDCl}_3$ )  $\delta$  7.34 – 7.28 (m, 5H), 6.19 (t,  $J$  = 7.6 Hz, 1H), 4.30 (q,  $J$  = 7.2 Hz, 2H), 4.30 (t,  $J$  = 7.2 Hz, 2H), 1.85 – 1.75 (m, 1H), 1.32 (t,  $J$  = 7.0 Hz, 3H), 0.97 (d,  $J$  = 6.4 Hz, 6H).  $^{13}\text{C}$  NMR (100 MHz,  $\text{CDCl}_3$ )  $\delta$  168.55, 138.44, 138.09, 135.45, 128.42, 127.62, 127.18, 60.84, 39.07, 28.93, 22.61, 14.43. IR ( $\text{cm}^{-1}$ ): 3085, 3062, 2957, 2869, 1721, 1636, 754. HRMS: calcd. for  $\text{C}_{15}\text{H}_{20}\text{NaO}_2^+$   $[\text{M}+\text{Na}]^+$ : 255.1356; Found: 255.1368.

**(5h) ethyl (E)-2-phenylpent-2-enoate<sup>5</sup>**

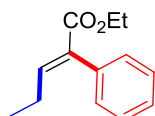

The title compound was prepared according to the general procedure described above by the reaction between ethyl propiolate (**2a**) with propionaldehyde (**1h**) and benzene (**3a**), and purified by flash column chromatography as colorless oil (22.9 mg, 56% (Z:E = 1:9)).

$^1\text{H}$  NMR (400 MHz,  $\text{CDCl}_3$ )  $\delta$  7.38 – 7.30 (m, 5H), 7.04 (t,  $J = 7.6$  Hz, 1H), 4.20 (q,  $J = 7.2$  Hz, 2H), 2.13 – 2.04 (m, 2H), 1.26 (t,  $J = 7.2$  Hz, 3H), 1.01 (t,  $J = 7.2$  Hz, 3H).  $^{13}\text{C}$  NMR (100 MHz,  $\text{CDCl}_3$ )  $\delta$  167.44, 146.37, 139.76, 129.90, 129.79, 128.00, 127.40, 60.87, 23.01, 14.34, 13.46. IR ( $\text{cm}^{-1}$ ): 3083, 3072, 2950, 2871, 1732, 1633, 755.

**(5i) (E)-4-ethoxy-4-oxo-3-phenylbut-2-en-1-yl benzoate**

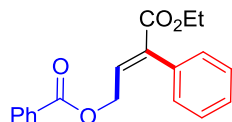

The title compound was prepared according to the general procedure described above by the reaction between ethyl propiolate (**2a**) with 2-oxoethyl benzoate (**1i**) and benzene (**3a**), and purified by flash column chromatography as colorless oil (42.1 mg, 68%).

$^1\text{H}$  NMR (400 MHz,  $\text{CDCl}_3$ )  $\delta$  8.07 (t,  $J = 4.2$  Hz, 2H), 7.56 (t,  $J = 7.4$  Hz, 1H), 7.45 (dd,  $J = 6.4$  Hz, 4H), 7.42 – 7.41 (m, 2H), 7.39 – 7.35 (m, 2H), 5.37 (s, 2H), 4.31 (dq,  $J = 53.6, 7.2$  Hz, 2H), 1.28 (dd,  $J = 14.0, 7.2$  Hz, 3H).  $^{13}\text{C}$  NMR (100 MHz,  $\text{CDCl}_3$ )  $\delta$  178.94, 166.59, 136.19, 133.18, 130.26, 129.85, 129.51, 128.95, 128.74, 128.52, 128.31, 128.22, 66.84, 61.90, 14.30. IR ( $\text{cm}^{-1}$ ): 3065, 3033, 2926, 2956, 2853, 1720, 1654, 735. HRMS: calcd. for  $\text{C}_{18}\text{H}_{16}\text{NaO}_4^+$   $[\text{M}+\text{Na}]^+$ : 333.1097; Found: 333.1090.

**(5j) ethyl (E)-2-phenylhex-2-enoate**

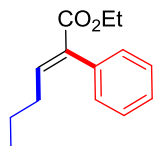

The title compound was prepared according to the general procedure described above by the reaction between ethyl propiolate (**2a**) with cyclopropanecarbaldehyde (**1j**) and benzene (**3a**), and purified by flash column chromatography as colorless oil (18.7 mg, 43%).

$^1\text{H}$  NMR (400 MHz,  $\text{CDCl}_3$ )  $\delta$  7.38 – 7.29 (m, 3H), 7.18 – 7.16 (m, 2H), 7.06 (t,  $J = 7.6$  Hz, 1H), 4.20 (q,  $J = 7.2$  Hz, 2H), 2.06 (dd,  $J = 14.8, 7.6$  Hz, 2H), 1.45 (dd,  $J = 14.8, 7.2$  Hz, 2H), 1.26 (t,  $J = 7.2$  Hz, 3H), 0.88 (t,  $J = 7.2$  Hz, 3H).  $^{13}\text{C}$  NMR (100 MHz,  $\text{CDCl}_3$ )  $\delta$  167.49, 145.06, 135.69, 134.20, 129.89, 128.03, 127.40, 60.92, 31.63, 22.28, 14.40, 14.00. IR ( $\text{cm}^{-1}$ ): 3012, 3001, 2958, 2837, 1736, 1073, 749. HRMS: calcd. for  $\text{C}_{14}\text{H}_{18}\text{NaO}_2^+$   $[\text{M}+\text{Na}]^+$ : 225.1244; Found: 225.1253.

**(5k) ethyl (Z)-4-methyl-2-phenylpent-2-enoate<sup>1</sup>**

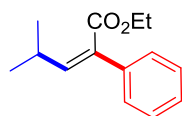

The title compound was prepared according to the general procedure described above by the reaction between ethyl propiolate (**2a**) with isobutyraldehyde (**1k**) and benzene (**3a**), and purified by flash column chromatography as colorless oil (34.9 mg, 80%).

$^1\text{H}$  NMR (400 MHz,  $\text{CDCl}_3$ )  $\delta$  7.38 – 7.29 (m, 4H), 7.17 (d,  $J$  = 7.2 Hz, 1H), 6.84 (d,  $J$  = 10.8 Hz, 0.7×1H), 5.95 (d,  $J$  = 10.0 Hz, 0.3×1H), 4.32 – 4.27 (m, 0.65×1H), 4.22 – 4.17 (m, 1.35×1H), 2.97 – 2.88 (m, 1H), 2.45 – 2.36 (m, 2H), 1.32 (t,  $J$  = 7.0 Hz, 1H), 1.26 (t,  $J$  = 6.6 Hz, 2H), 1.10 (d,  $J$  = 6.4 Hz, 2H), 0.99 (d,  $J$  = 6.4 Hz, 4H).  $^{13}\text{C}$  NMR (100 MHz,  $\text{CDCl}_3$ )  $\delta$  168.62, 167.62, 151.32, 145.47, 137.74, 135.80, 132.68, 131.84, 129.91, 129.66, 128.39, 128.03, 127.59, 127.37, 127.07, 60.92, 60.86, 29.56, 28.64, 22.83, 22.33, 14.35. IR ( $\text{cm}^{-1}$ ): 3012, 3001, 2958, 2837, 1736, 1073, 749.

**(5l) ethyl (Z)-3-(2,2-dimethyl-1,3-dioxolan-4-yl)-2-phenylacrylate**

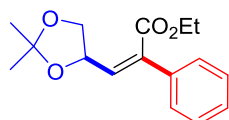

The title compound was prepared according to the general procedure described above by the reaction between ethyl propiolate (**2a**) with 2,2-dimethyl-1,3-dioxolane-4-carbaldehyde (**1l**) and benzene (**3a**), and purified by flash column chromatography as colorless oil (39.7 mg, 72%).

$^1\text{H}$  NMR (400 MHz,  $\text{CDCl}_3$ )  $\delta$  7.35 – 7.30 (m, 5H), 6.27 (d,  $J$  = 7.2 Hz, 1H), 5.14 (q,  $J$  = 7.2 Hz, 1H), 4.35 (dd,  $J$  = 8.4, 6.8 Hz, 1H), 4.32 – 4.26 (m, 2H), 3.74 (dd,  $J$  = 8.4, 7.2 Hz, 1H), 1.44 (d,  $J$  = 19.6 Hz, 6H), 1.31 (t,  $J$  = 7.2 Hz, 3H).  $^{13}\text{C}$  NMR (100 MHz,  $\text{CDCl}_3$ )  $\delta$  167.19, 139.88, 136.96, 136.38, 128.44, 128.30, 127.83, 109.96, 74.32, 69.83, 61.39, 26.75, 25.77, 14.36. IR ( $\text{cm}^{-1}$ ): 3433, 3031, 2985, 2935, 2874, 1716, 1637, 761. HRMS: calcd. for  $\text{C}_{15}\text{H}_{17}\text{NaO}_4^+$   $[\text{M}+\text{Na}]^+$ : 299.1254; Found: 299.1267.

**(5m) Ethyl(Z)-2-phenyl-3-(2,2,7,7-tetramethyltetrahydro-5H-bis([1,3]dioxolo)[4,5-b:4',5'-d]pyran-5-yl)acrylate<sup>6</sup>**

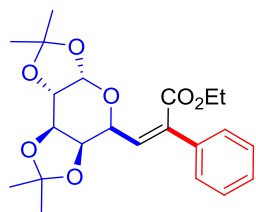

The title compound was prepared according to the general procedure described above by the reaction between ethyl propiolate (**2a**) with D-galactopyranose (**1m**) and benzene (**3a**), and purified by flash column chromatography as colorless oil (48.5 mg, 72%, d.r. = 1:1).

$^1\text{H}$  NMR (400 MHz,  $\text{CDCl}_3$ )  $\delta$  7.43 – 7.29 (m, 5H), 6.28 (d,  $J$  = 8.0 Hz, 0.5×1H), 6.08 (d,  $J$  = 7.2 Hz, 0.5×1H), 5.59 (d,  $J$  = 5.2 Hz, 0.5×1H), 5.33 (d,  $J$  = 2.4 Hz, 0.5×1H), 5.05 (dd,  $J$  = 8.0, 2.0 Hz, 0.5×1H), 4.71 – 4.66 (m, 0.5×1H), 4.59 (dd,  $J$  = 5.2, 3.6 Hz, 0.5×1H), 4.50 (dd,  $J$  = 7.6, 2.0 Hz, 0.5×1H), 4.40 – 4.35 (m, 1H), 4.33 – 4.27 (m, 2H), 4.24 (dd,  $J$  = 8.8, 5.2 Hz, 0.5×1H), 4.09 (dd,  $J$  = 9.6, 5.2 Hz, 0.5×1H), 1.58 – 1.48 (m, 6H), 1.44 – 1.36 (m, 6H), 1.34 – 1.26 (m, 3H).  $^{13}\text{C}$  NMR (100 MHz,  $\text{CDCl}_3$ )  $\delta$  166.40, 138.87, 137.73, 134.54, 129.77, 127.98, 111.01, 109.10, 100.01, 96.25, 75.53, 74.18, 72.96, 70.30, 61.26, 27.97, 27.11, 25.84, 25.60, 14.20. HRMS: calcd. for  $\text{C}_{21}\text{H}_{25}\text{NaO}_7^+$   $[\text{M}+\text{Na}]^+$ : 427.1727; Found: 427.1775.

**(6b) ethyl (Z)-2-(2,5-dimethylphenyl)-4,4-dimethylpent-2-enoate**

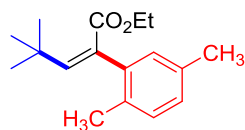

The title compound was prepared according to the general procedure described above by the reaction between ethyl propiolate (**2a**) with pivalaldehyde (**1a**) and *p*-xylene (**3b**), and purified by flash column chromatography as colorless oil (38.5 mg, 74%).

$^1\text{H}$  NMR (400 MHz,  $\text{CDCl}_3$ )  $\delta$  7.12 (s, 1H), 7.06 – 6.98 (m, 2H), 5.59 (s, 1H), 4.17 (d,  $J$  = 7.2 Hz, 2H), 2.30 (t,  $J$  = 9.4 Hz, 6H), 1.27 (t,  $J$  = 7.0 Hz, 3H), 1.19 (s, 9H).  $^{13}\text{C}$  NMR (100 MHz,  $\text{CDCl}_3$ )  $\delta$  169.64, 146.64, 139.06, 135.19, 130.24, 130.13, 129.43, 128.63, 128.45, 60.85, 33.97, 29.92, 20.98, 19.56, 14.18. IR ( $\text{cm}^{-1}$ ): 3098, 3017, 2957, 2868, 1721, 1683, 1646, 747. HRMS: calcd. for  $\text{C}_{16}\text{H}_{22}\text{O}_2^+$   $[\text{M}+\text{H}]^+$ : 247.1693; Found: 247.1689.

**(6c) ethyl (Z)-2-(2,5-bis(trifluoromethyl)phenyl)-4,4-dimethylpent-2-enoate**

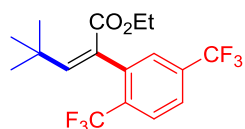

The title compound was prepared according to the general procedure described above by the reaction between ethyl propiolate (**2a**) with pivalaldehyde (**1a**) and 1,4-bis(trifluoromethyl)benzene (**3c**), and purified by flash column chromatography as colorless oil (53.7 mg, 73%).

$^1\text{H}$  NMR (400 MHz,  $\text{CDCl}_3$ )  $\delta$  7.80 – 7.65 (m, 3H), 5.84 (s, 1H), 4.18 (q,  $J$  = 7.2 Hz, 2H), 1.25 (s, 3H), 1.24 (s, 9H).  $^{13}\text{C}$  NMR (100 MHz,  $\text{CDCl}_3$ )  $\delta$  166.23, 156.95, 147.20, 144.73, 142.94, 120.42, 119.01 (t,  $J$  = 9.2 Hz), 105.10 (t,  $J$  = 89.6 Hz), 61.41, 34.75, 29.75, 14.02. IR ( $\text{cm}^{-1}$ ): 2961, 2929, 2872, 2856, 1731, 1647, 753. HRMS: calcd. for  $\text{C}_{16}\text{H}_{15}\text{F}_6\text{NaO}_2^+$   $[\text{M}+\text{Na}]^+$ : 391.1103; Found: 391.1120.

**(6d) ethyl (Z)-2-(2,5-dichlorophenyl)-4,4-dimethylpent-2-enoate**

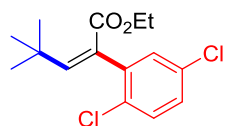

The title compound was prepared according to the general procedure described above by the reaction between ethyl propiolate (**2a**) with pivalaldehyde (**1a**) and 1,4-dichlorobenzene (**3d**), and purified by flash column chromatography as colorless oil (55.8 mg, 93%)

$^1\text{H}$  NMR (400 MHz,  $\text{CDCl}_3$ )  $\delta$  7.27 (dd,  $J$  = 8.8, 2.8 Hz, 2H), 7.19 (dd,  $J$  = 8.4, 2.4 Hz, 1H), 5.94 (s, 1H), 4.21 (q,  $J$  = 7.2 Hz, 2H), 1.28 (d,  $J$  = 7.2 Hz, 3H), 1.25 (s, 9H).  $^{13}\text{C}$  NMR (100 MHz,  $\text{CDCl}_3$ )  $\delta$  167.26, 152.51, 140.46, 132.51, 131.75, 131.22, 130.66, 129.99, 128.88, 61.17, 34.22, 29.88, 14.10. IR ( $\text{cm}^{-1}$ ): 3018, 2989, 2876, 2813, 1712, 1688, 748. HRMS: calcd. for  $\text{C}_{14}\text{H}_{15}\text{Cl}_2\text{NaO}_2^+$   $[\text{M}+\text{Na}]^+$ : 323.0576; Found: 323.0570.



**(6e) ethyl (Z)-2-(2,5-dibromophenyl)-4,4-dimethylpent-2-enoate**

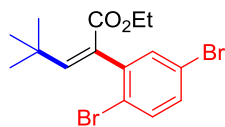

The title compound was prepared according to the general procedure described above by the reaction between ethyl propiolate (**2a**) with pivalaldehyde (**1a**) and 1,4-dibromobenzene (**3e**), and purified by flash column chromatography as colorless oil (65.0 mg, 84%)

$^1\text{H}$  NMR (400 MHz,  $\text{CDCl}_3$ )  $\delta$  7.42 (dd,  $J = 10.0, 2.4$  Hz, 2H), 7.26 (dd,  $J = 8.4, 2.0$  Hz, 1H), 5.89 (s, 1H), 4.20 (q,  $J = 7.2$  Hz, 2H), 1.27 (d,  $J = 7.2$  Hz, 3H), 1.25 (s, 9H).  $^{13}\text{C}$  NMR (100 MHz,  $\text{CDCl}_3$ )  $\delta$  166.94, 152.72, 142.73, 134.14, 134.03, 131.99, 131.31, 122.34, 121.07, 61.17, 34.17, 29.81, 14.11. IR ( $\text{cm}^{-1}$ ): 3016, 2957, 2870, 2844, 1719, 1648, 754. HRMS: calcd. for  $\text{C}_{14}\text{H}_{15}\text{Br}_2\text{NaO}_2^+$   $[\text{M}+\text{Na}]^+$ : 410.9566; Found: 410.9571.

**(6f) ethyl (Z)-2-(2,3-dichlorophenyl)-4,4-dimethylpent-2-enoate**

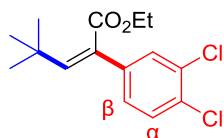

The title compound was prepared according to the general procedure described above by the reaction between ethyl propiolate (**2a**) with pivalaldehyde (**1a**) and 1,2-dichlorobenzene (**3f**), and purified by flash column chromatography as colorless oil (47.4 mg, 79% ( $\alpha:\beta = 1:1$ )).

$^1\text{H}$  NMR (400 MHz,  $\text{CDCl}_3$ )  $\delta$  7.42 – 7.36 (m,  $1.5\times 1\text{H}$ ), 7.21 – 7.14 (m, 4.0 Hz,  $1.5\times 1\text{H}$ ), 5.93 (s,  $0.5\times 1\text{H}$ ), 5.90 (s,  $0.5\times 1\text{H}$ ), 4.31 – 4.18 (m, 2H), 1.35 – 1.26 (m, 3H), 1.21 (d,  $J = 26.8$  Hz, 9H).  $^{13}\text{C}$  NMR (100 MHz,  $\text{CDCl}_3$ )  $\delta$  169.17, 167.40, 152.17, 144.31, 141.32, 138.20, 133.17, 132.70, 131.90, 131.73, 130.81, 130.45, 129.73, 129.67, 128.17, 127.24, 125.57, 61.44, 61.13, 34.20, 34.15, 29.88, 29.73, 14.14, 14.10. IR ( $\text{cm}^{-1}$ ): 3019, 2961, 2906, 2870, 1720, 1635, 743. HRMS: calcd. for  $\text{C}_{14}\text{H}_{15}\text{Cl}_2\text{NaO}_2^+$   $[\text{M}+\text{Na}]^+$ : 323.0576; Found: 323.0557.

**(6g) ethyl (Z)-2-mesityl-4,4-dimethylpent-2-enoate**

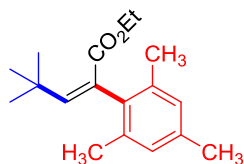

The title compound was prepared according to the general procedure described above by the reaction between ethyl propiolate (**2a**) with pivalaldehyde (**1a**) and mesitylene (**3g**), and purified by flash column chromatography as colorless oil (35.1 mg, 64%)

$^1\text{H}$  NMR (400 MHz,  $\text{CDCl}_3$ )  $\delta$  6.85 (s, 2H), 5.49 (s, 1H), 4.13 (q,  $J = 6.8$  Hz, 2H), 2.27 (d,  $J = 7.2$  Hz, 9H), 1.24 (t,  $J = 7.2$  Hz, 3H), 1.20 (s, 9H).  $^{13}\text{C}$  NMR (100 MHz,  $\text{CDCl}_3$ )  $\delta$  169.24, 147.33, 137.14, 136.93, 136.16, 130.14, 128.28, 60.64, 33.91, 29.83, 21.13, 20.30, 14.18. IR ( $\text{cm}^{-1}$ ): 3098,

2987, 2957, 2868, 1721, 1646, 747. HRMS: calcd. for  $C_{17}H_{24}O_2^+$   $[M+H]^+$ : 275.2006; Found: 275.2007.

**(6h) ethyl (Z)-4,4-dimethyl-2-(2,4,6-tribromophenyl)pent-2-enoate**

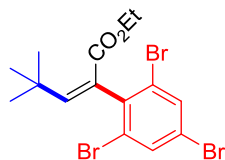

The title compound was prepared according to the general procedure described above by the reaction between ethyl propiolate (**2a**) with pivalaldehyde (**1a**) and 1,3,5-tribromobenzene (**3h**), and purified by flash column chromatography as yellow oil (53.0 mg, 57%)

$^1H$  NMR (400 MHz,  $CDCl_3$ )  $\delta$  7.66 (d,  $J = 36.4$  Hz, 2H), 5.94 (s, 1H), 4.17 (q,  $J = 7.2$  Hz, 2H), 1.31 (s, 9H), 1.22 (t,  $J = 7.2$  Hz, 3H).  $^{13}C$  NMR (100 MHz,  $CDCl_3$ )  $\delta$  164.65, 158.11, 140.94, 134.22, 133.15, 130.96, 125.70, 121.72, 60.93, 34.16, 29.66, 14.15. IR ( $cm^{-1}$ ): 3105, 3056, 2976, 2870, 1698, 1639, 748. HRMS: calcd. for  $C_{14}H_{15}Br_3O_2^+$   $[M+H]^+$ : 466.8851; Found: 466.8851.

**(6i) ethyl (Z)-4,4-dimethyl-2-(2,3,5,6-tetrafluorophenyl)pent-2-enoate**

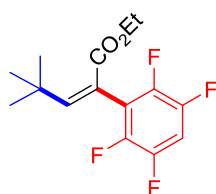

The title compound was prepared according to the general procedure described above by the reaction between ethyl propiolate (**2a**) with pivalaldehyde (**1a**) and 1,2,4,5-tetrafluorobenzene (**3i**), and purified by flash column chromatography as yellow oil (40.1 mg, 66%)

$^1H$  NMR (400 MHz,  $CDCl_3$ )  $\delta$  7.03 – 6.98 (m, 1H), 6.17 (s, 1H), 4.23 (d,  $J = 7.2$  Hz, 2H), 1.29 (d,  $J = 7.2$  Hz, 3H), 1.27 (s, 9H).  $^{13}C$  NMR (100 MHz,  $CDCl_3$ )  $\delta$  166.78, 152.52, 139.86, 128.95, 128.38, 127.04, 124.60, 61.23, 34.21, 29.62, 14.00.  $^{19}F$  NMR (400 MHz,  $CDCl_3$ )  $\delta$  -139.43, -139.46, -139.49, -139.52, -141.97, -142.01, -142.03, -142.07. IR ( $cm^{-1}$ ): 3108, 3093, 2976, 2862, 1868, 1646, 755. HRMS: calcd. for  $C_{14}H_{13}F_4NaO_2^+$   $[M+Na]^+$ : 327.0979; Found: 327.0970.

**(6j) ethyl (Z)-4,4-dimethyl-2-(phenyl- $d_5$ )pent-2-enoate**

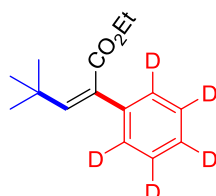

The title compound was prepared according to the general procedure described above by the reaction between ethyl propiolate (**2a**) with pivalaldehyde (**1a**) and benzene- $d_6$  (**3j**), and purified by flash column chromatography as yellow oil (18.8 mg, 79%)

$^1\text{H}$  NMR (400 MHz,  $\text{CDCl}_3$ )  $\delta$  5.90 (s, 1H), 4.28 (q,  $J = 7.2$  Hz, 2H), 1.33 (t,  $J = 7.2$  Hz, 3H), 1.19 (s, 9H).  $^{13}\text{C}$  NMR (100 MHz,  $\text{CDCl}_3$ )  $\delta$  170.11, 142.49, 137.94, 132.24, 128.11, 127.87 (t,  $J = 48.4$  Hz), 125.71 (t,  $J = 48.2$  Hz), 61.12, 34.04, 29.90, 14.20. IR ( $\text{cm}^{-1}$ ): 3093, 3039, 2915, 2820, 1727, 1540, 755. HRMS: calcd. for  $\text{C}_{14}\text{H}_{12}\text{D}_5\text{NaO}_2^+$   $[\text{M}+\text{Na}]^+$ : 260.1669; Found: 260.1670.

**(6k) ethyl (Z)-4,4-dimethyl-2-(p-tolyl)pent-2-enoate<sup>7,8</sup>**

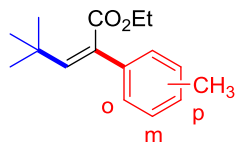

The title compound was prepared according to the general procedure described above by the reaction between ethyl propiolate (**2a**) with pivalaldehyde (**1a**) and toluene (**3k**), and purified by flash column chromatography as colorless oil (34.4 mg, 70%,  $o:m:p = 6:2:1$ ).

$^1\text{H}$  NMR (400 MHz,  $\text{CDCl}_3$ )  $\delta$  7.22 – 7.11 (m, 4H), 5.88 (s, 0.2 $\times$ 1H), 5.86 (s, 0.1 $\times$ 1H), 5.60 (s, 0.6 $\times$ 1H), 4.29 – 4.14 (m, 2H), 2.33 (d,  $J = 6.8$  Hz, 3H), 1.33 – 1.24 (m, 3H), 1.20 – 1.18 (m, 9H).  $^{13}\text{C}$  NMR (100 MHz,  $\text{CDCl}_3$ )  $\delta$  169.52, 146.89, 146.73, 142.36, 141.73, 139.33, 136.42, 131.75, 130.33, 129.57, 129.33, 128.53, 127.71, 126.86, 126.02, 125.75, 123.28, 60.86, 34.00, 29.91, 20.06, 14.18. IR ( $\text{cm}^{-1}$ ): 3053, 3019, 2910, 2872, 1717, 1640, 754 .. HRMS: calcd. for  $\text{C}_{14}\text{H}_{18}\text{O}_2^+$   $[\text{M}+\text{H}]^+$ : 247.1693 Found: 247.1689.

**(6l) ethyl (Z)-2-([1,1'-biphenyl]-4-yl)-4,4-dimethylpent-2-enoate<sup>8</sup>**

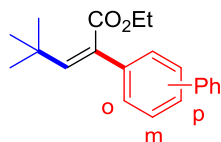

The title compound was prepared according to the general procedure described above by the reaction between ethyl propiolate (**2a**) with pivalaldehyde (**1a**) and 1,1'-biphenyl (**3m**), and purified by flash column chromatography as colorless oil (50.5 mg, 82%,  $o:p = 5:3$ )

$^1\text{H}$  NMR (400 MHz,  $\text{CDCl}_3$ )  $\delta$  7.56 (dd,  $J = 12.0, 7.6$  Hz, 3H), 7.45 – 7.33 (m, 6H), 5.69 (d,  $J = 225.2$  Hz, 1H), 4.34 – 4.00 (m, 2H), 1.37 – 1.32 (m, 2.5 $\times$ 1H), 1.20 (s, 6H), 1.18 (s, 0.5 $\times$ 1H), 0.94 (s, 3H).  $^{13}\text{C}$  NMR (100 MHz,  $\text{CDCl}_3$ )  $\delta$  170.10, 169.28, 149.39, 142.53, 138.43, 137.09, 131.93, 130.59, 130.09, 129.37, 128.92, 128.89, 127.97, 127.76, 127.50, 127.38, 127.35, 127.22, 127.14, 126.77, 126.53, 125.13, 61.20, 60.81, 34.11, 33.79, 29.93, 29.39, 14.23, 14.06. IR ( $\text{cm}^{-1}$ ): 3058, 3029, 2957, 2869, 1718, 1636, 751. HRMS: calcd. for  $\text{C}_{21}\text{H}_{25}\text{O}_2^+$   $[\text{M}+\text{H}]^+$ : 309.1849; Found: 309.1850.

**(6m) ethyl (Z)-4,4-dimethyl-2-(naphthalen-1-yl)pent-2-enoate<sup>8,9</sup>**

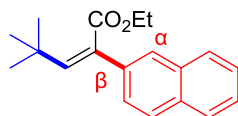

The title compound was prepared according to the general procedure described above by the reaction between ethyl propiolate (**2a**) with pivalaldehyde (**1a**) and naphthalene (**3n**), and purified by flash column chromatography as colorless oil (34.4 mg, 61%,  $\alpha$ : $\beta$ = 1:5)

$^1\text{H}$  NMR (400 MHz,  $\text{CDCl}_3$ )  $\delta$  8.18 – 7.78 (m, 3H), 7.52 – 7.42 (m, 4H), 5.92 (d,  $J$  = 101.6 Hz, 1H), 4.24 (dq,  $J$  = 70.4, 7.2 Hz, 2H), 1.22 (q,  $J$  = 7.2 Hz, 12H).  $^{13}\text{C}$  NMR (100 MHz,  $\text{CDCl}_3$ )  $\delta$  169.66, 147.83, 137.25, 133.81, 132.10, 130.76, 128.29, 128.16, 126.88, 126.26, 125.89, 125.82, 125.39, 61.04, 34.24, 29.96, 14.13. IR ( $\text{cm}^{-1}$ ): 3132, 3059, 2917, 2826, 1712, 1620, 755. HRMS: calcd. for  $\text{C}_{19}\text{H}_{23}\text{O}_2^+$   $[\text{M}+\text{H}]^+$ : 283.1693; Found: 283.1692.

## VIII. References

1. A. K. Gupta, K. S. Kim and H. O. Chang, *Synlett*, 2005, **3**, 457.
2. C. Schoellkopf and W. Hoppe; *Justus Liebigs Annalen der Chemie*, 1974, 1657.
3. Y. Wan, Z. Shao, K. Zhang and Q. Liu, *Angewandte Chemie International Edition*, 2018, **57**, 15143.
4. R. Rossi, A. Carpita and P. cossi, *Tetrahedron*, 1992, **48**, 8801.
5. N. Slougu and G. Rousseau, *Synthetic Communications*, 1982, **12**, 401.
6. C. Romano and C. Mazet, *Journal of the American Chemical Society*, 2018, **140**, 4743.
7. N. Jiang, Z.-H. Qu and J.-B. Wang, *Organic Letters*, 2001, **3**, 2989.
8. S.-J. Song, P. Lu, H. Liu, S.-H. Cai, C. Feng and T.-P. Loh, *Organic Letters*, 2017, **19**, 2869.
9. D. A. Rooke and E. M. Ferreira, *Organic Letters*, 2012, **14**, 1552.

## IX. Copies of $^1\text{H}$ and $^{13}\text{C}$ NMR spectra of products 4a-4i, 5b-5m, 6b-6m

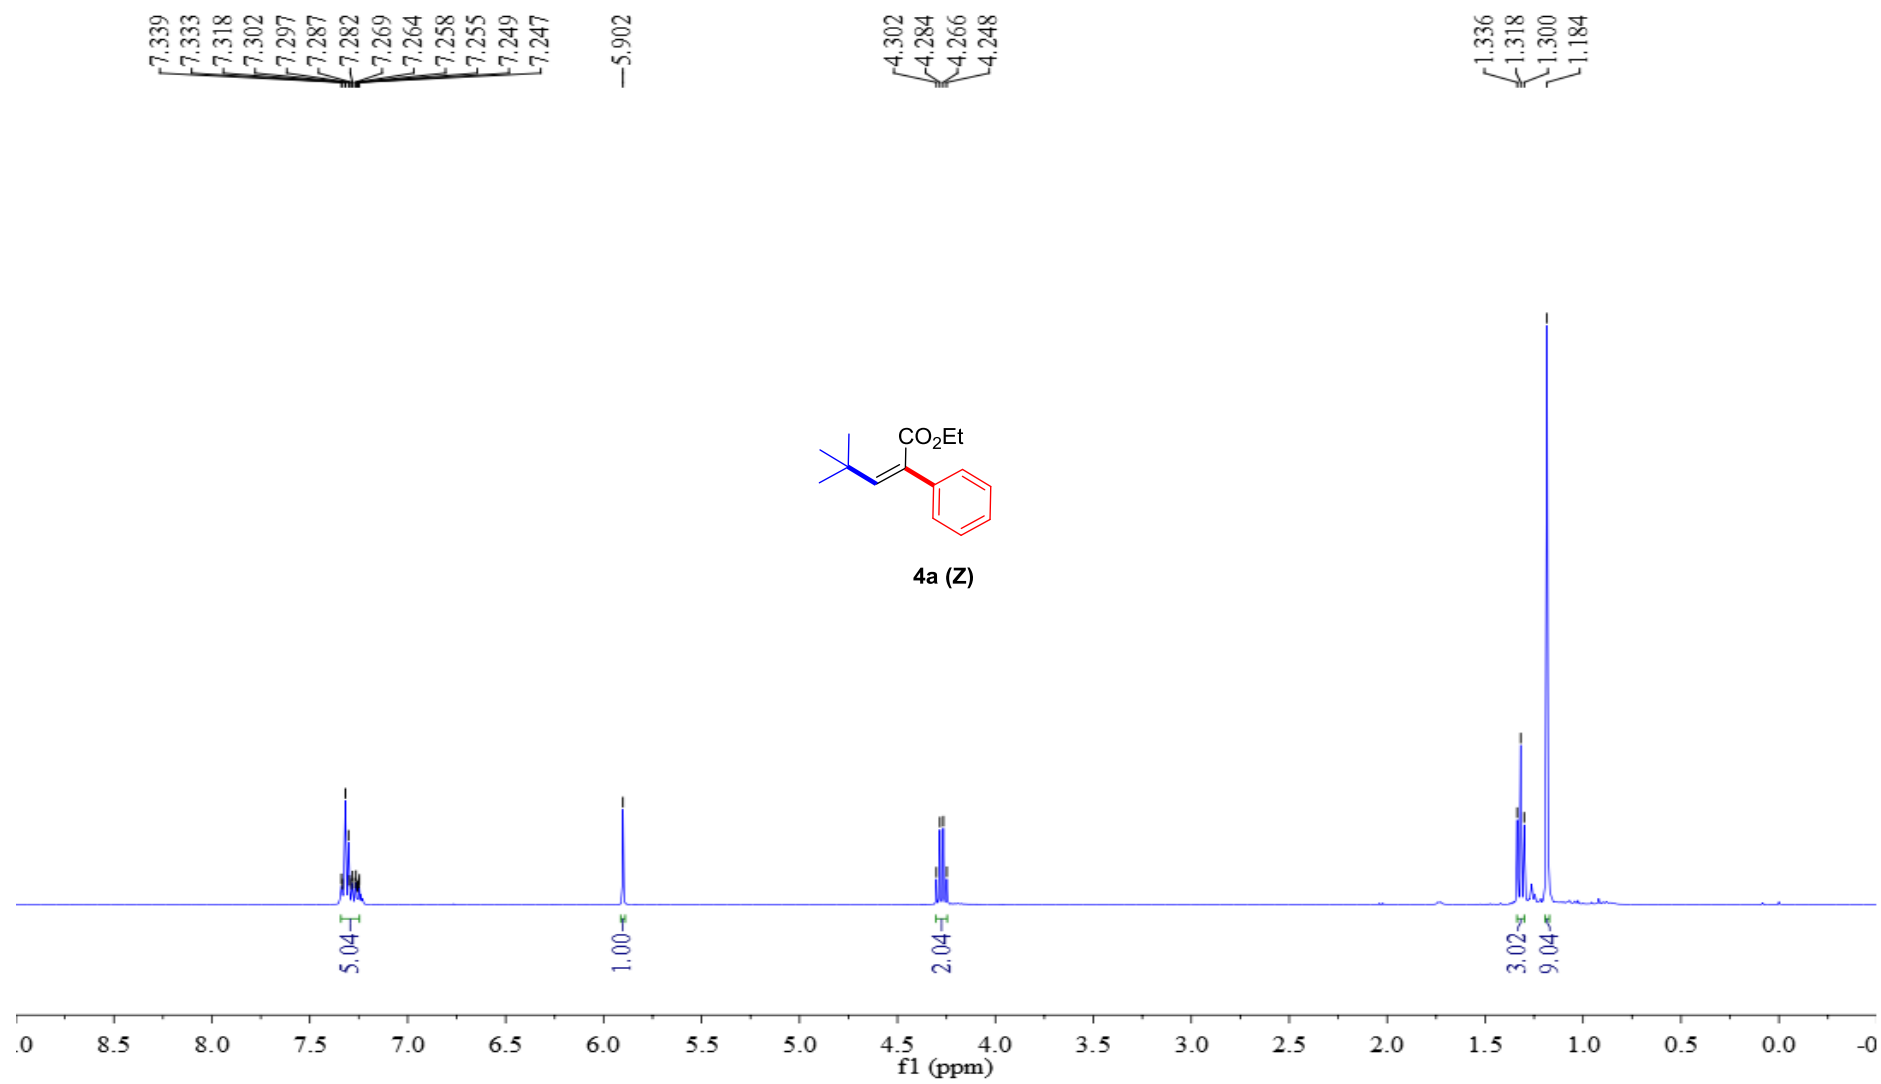

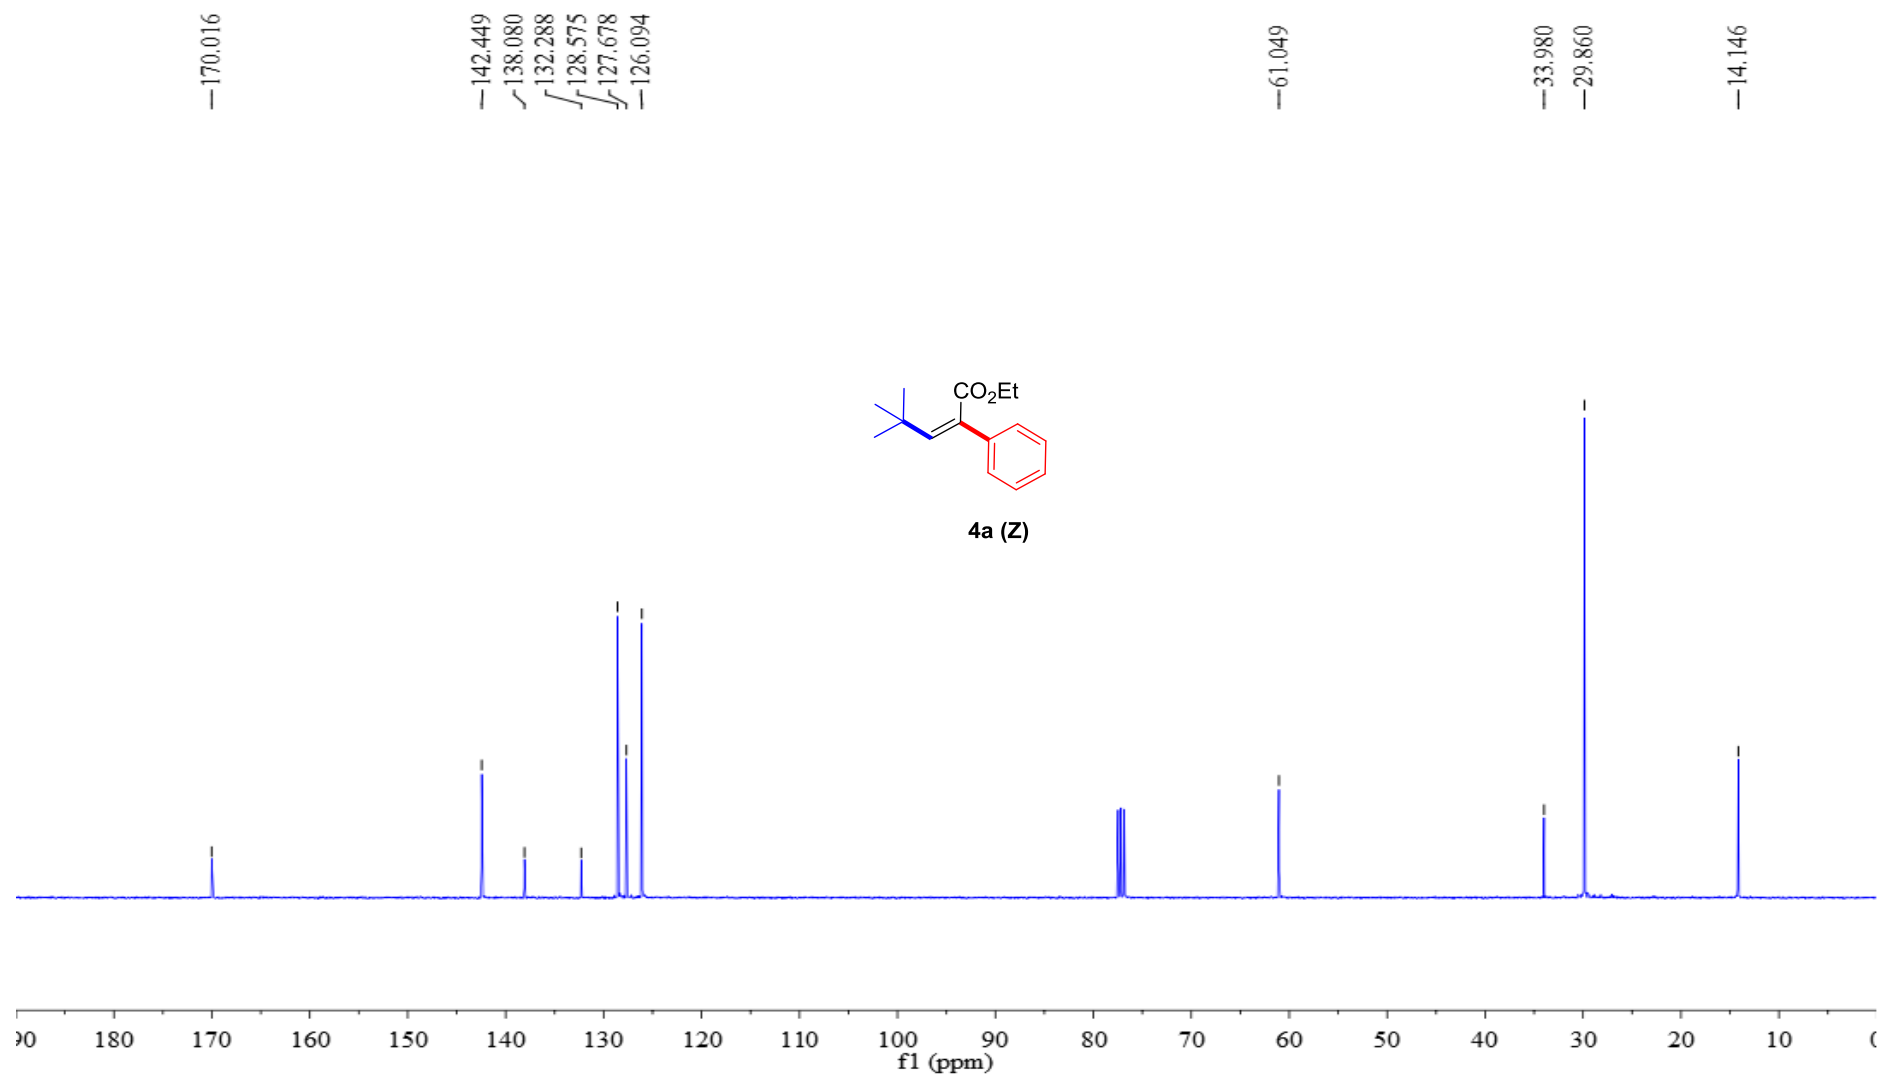

丰度

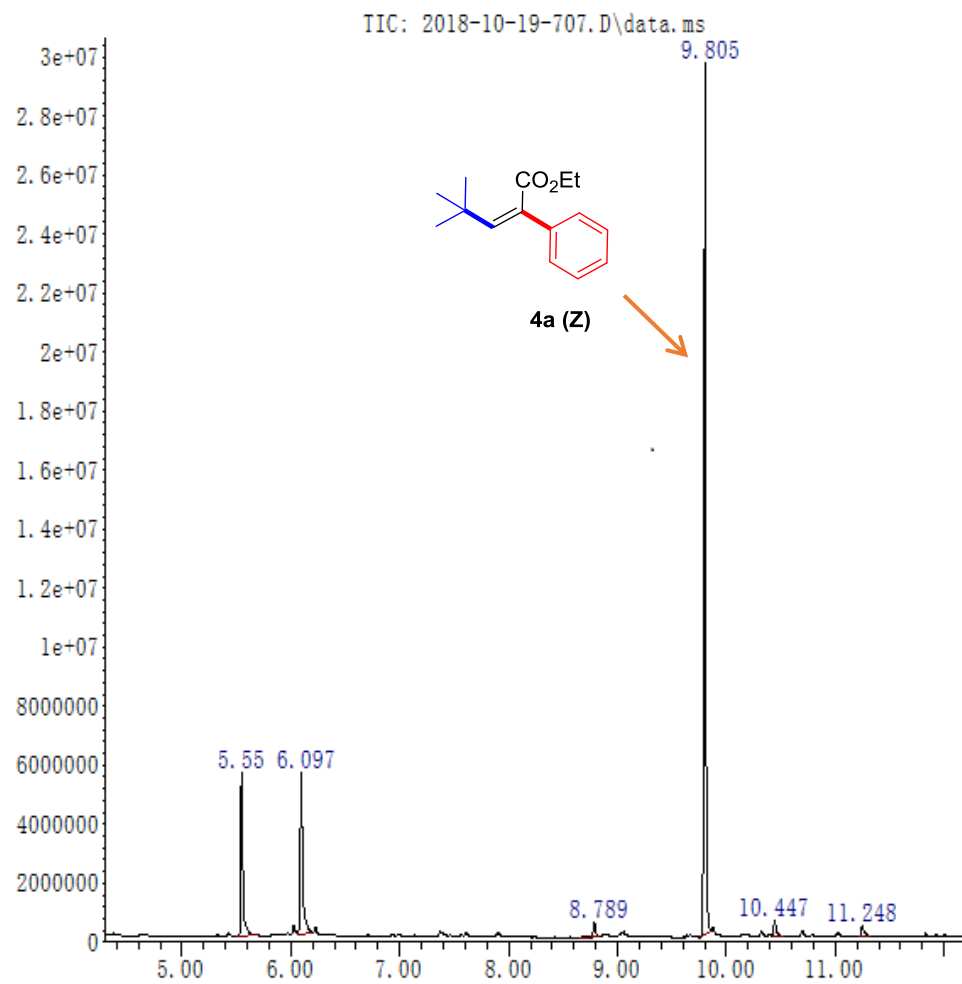

丰度

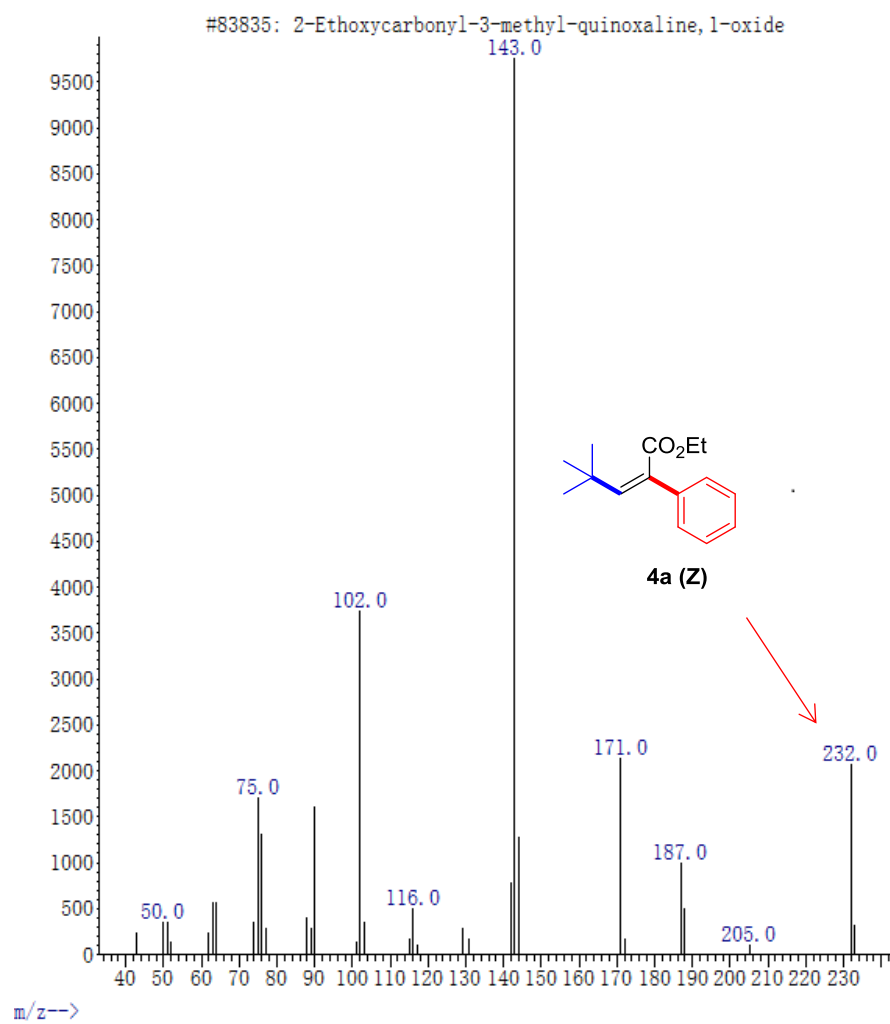

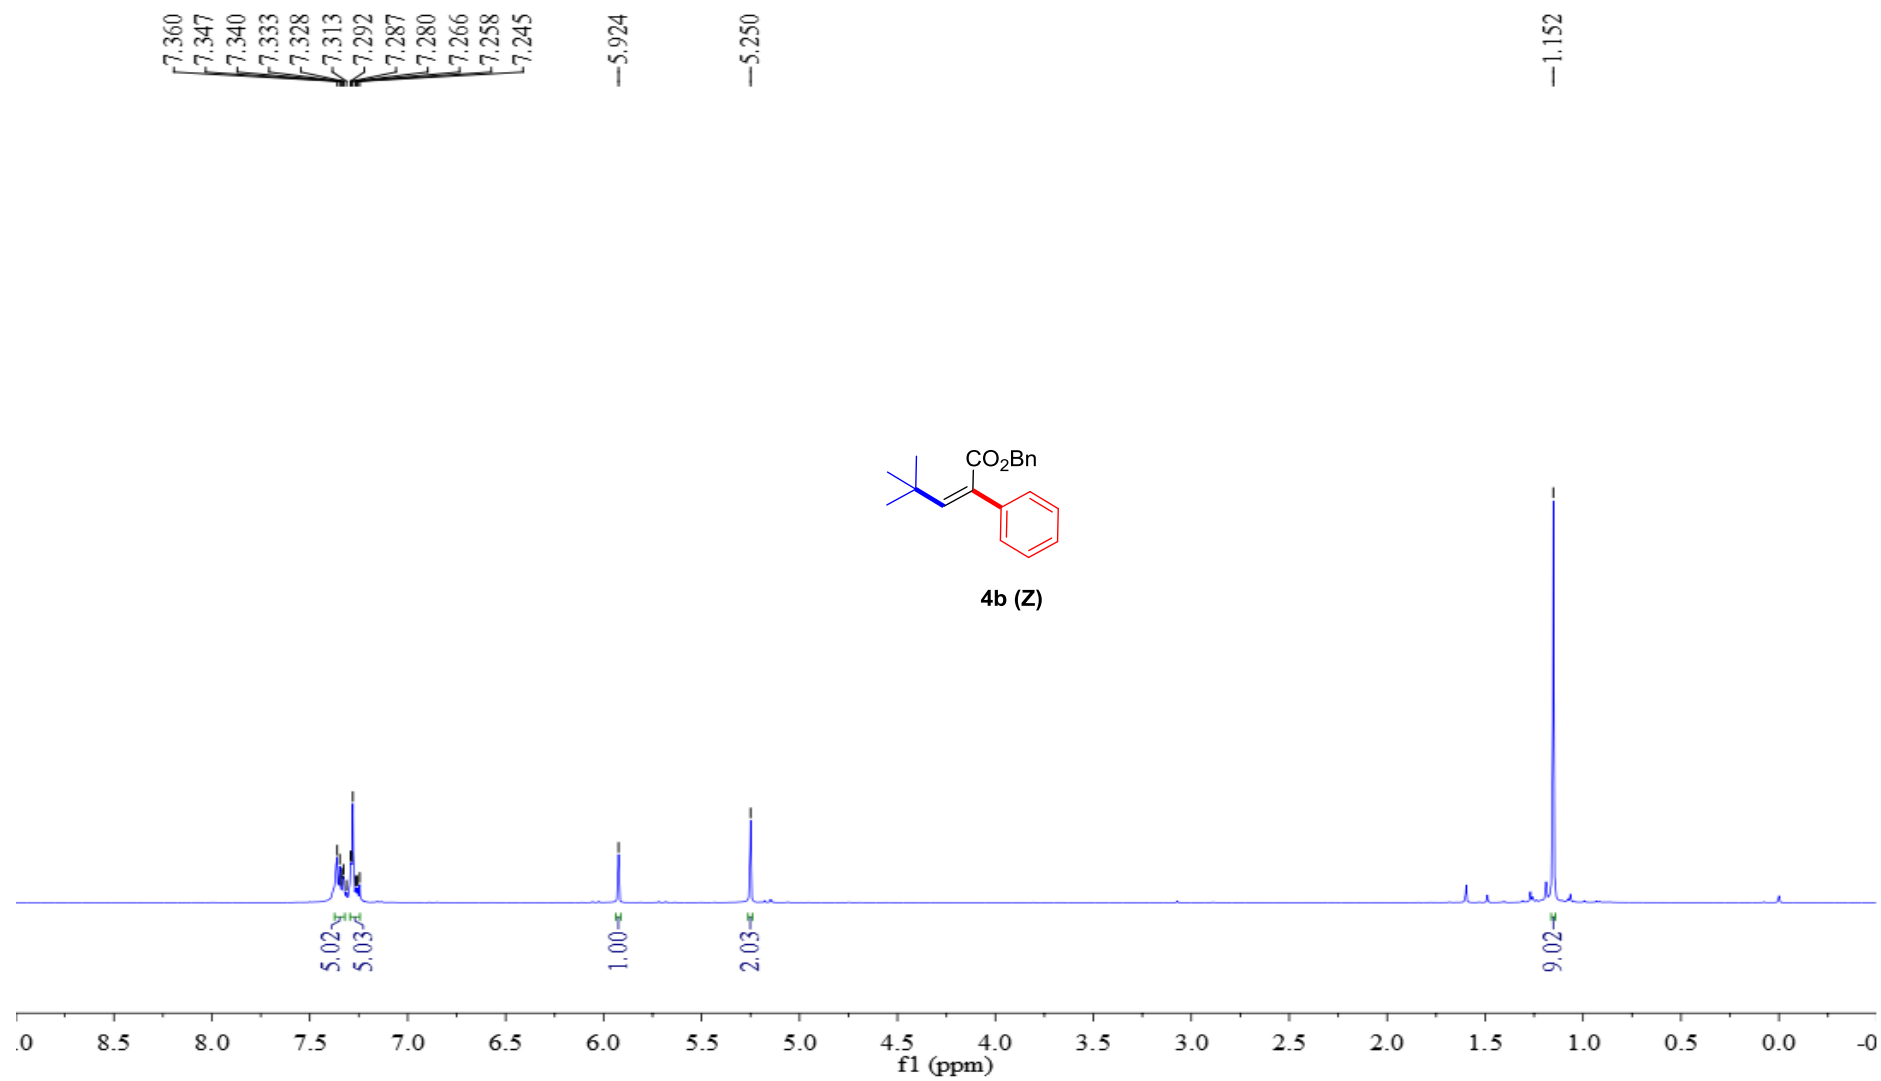



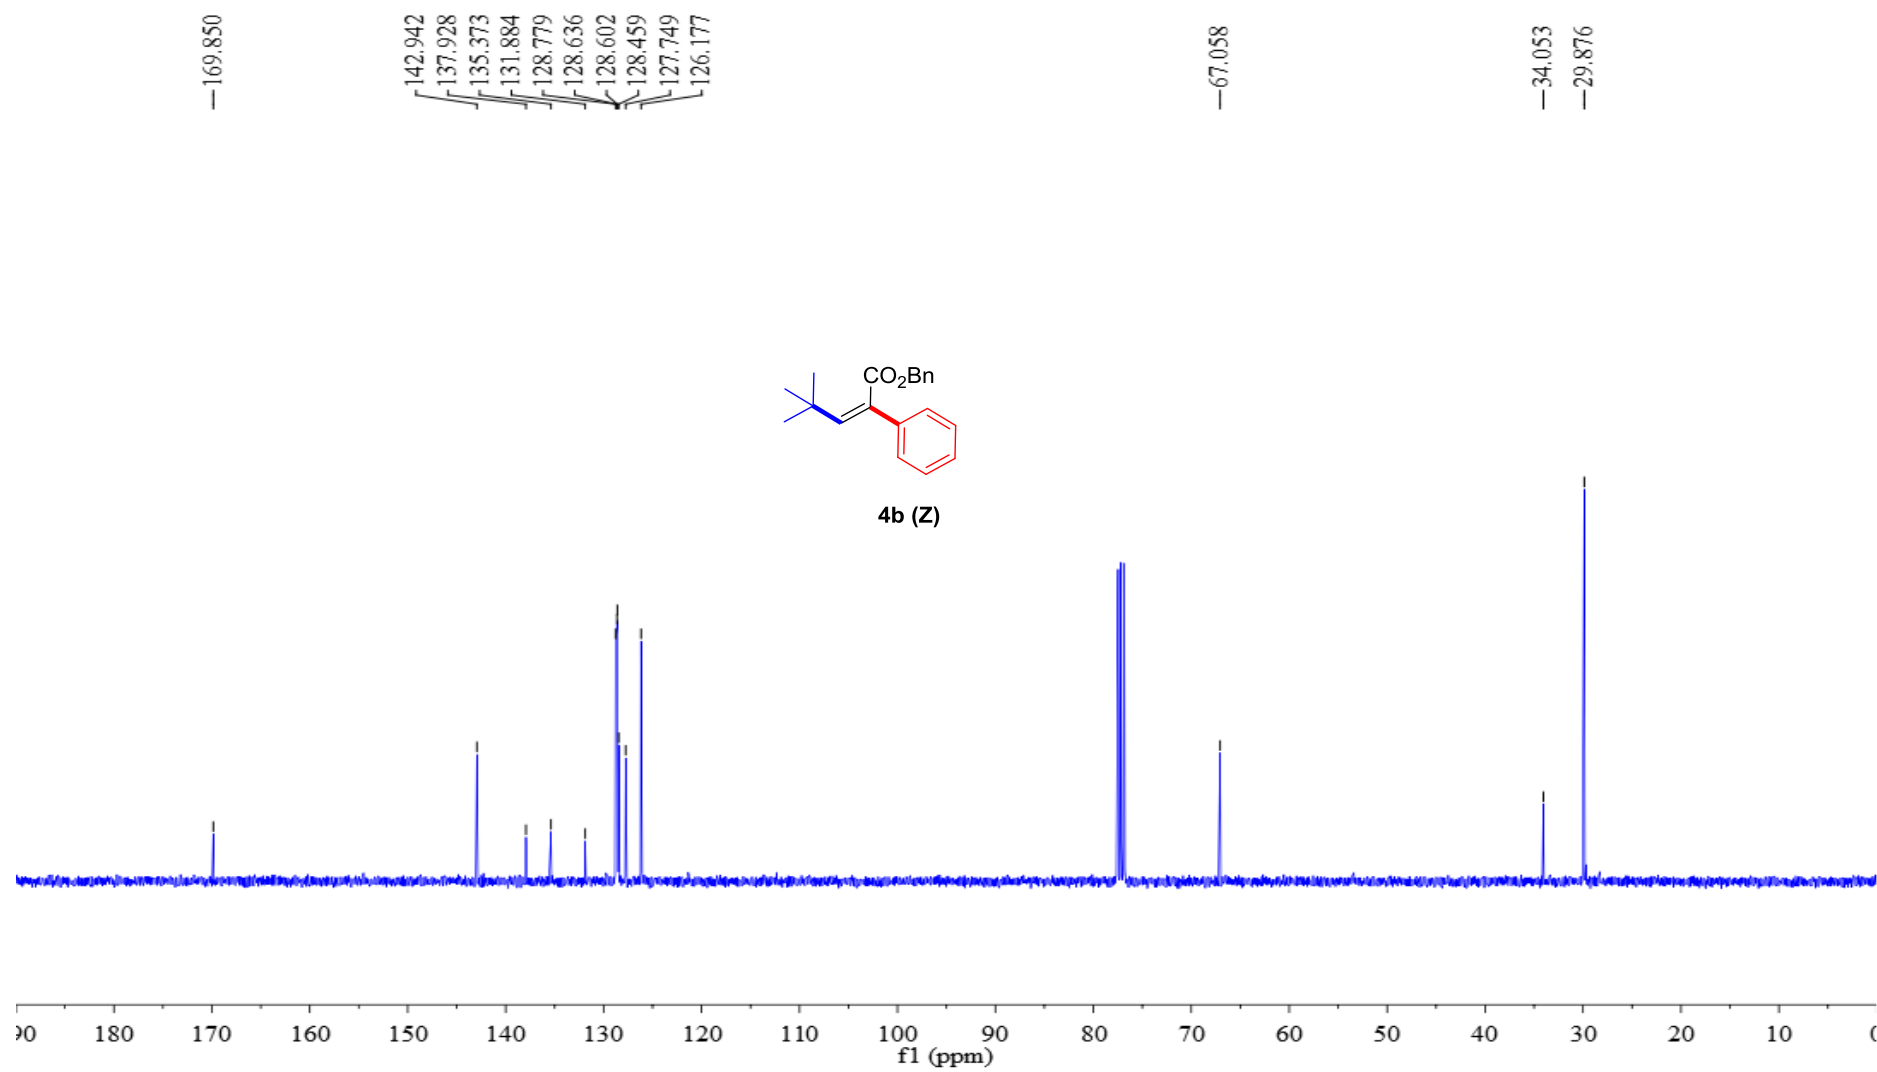

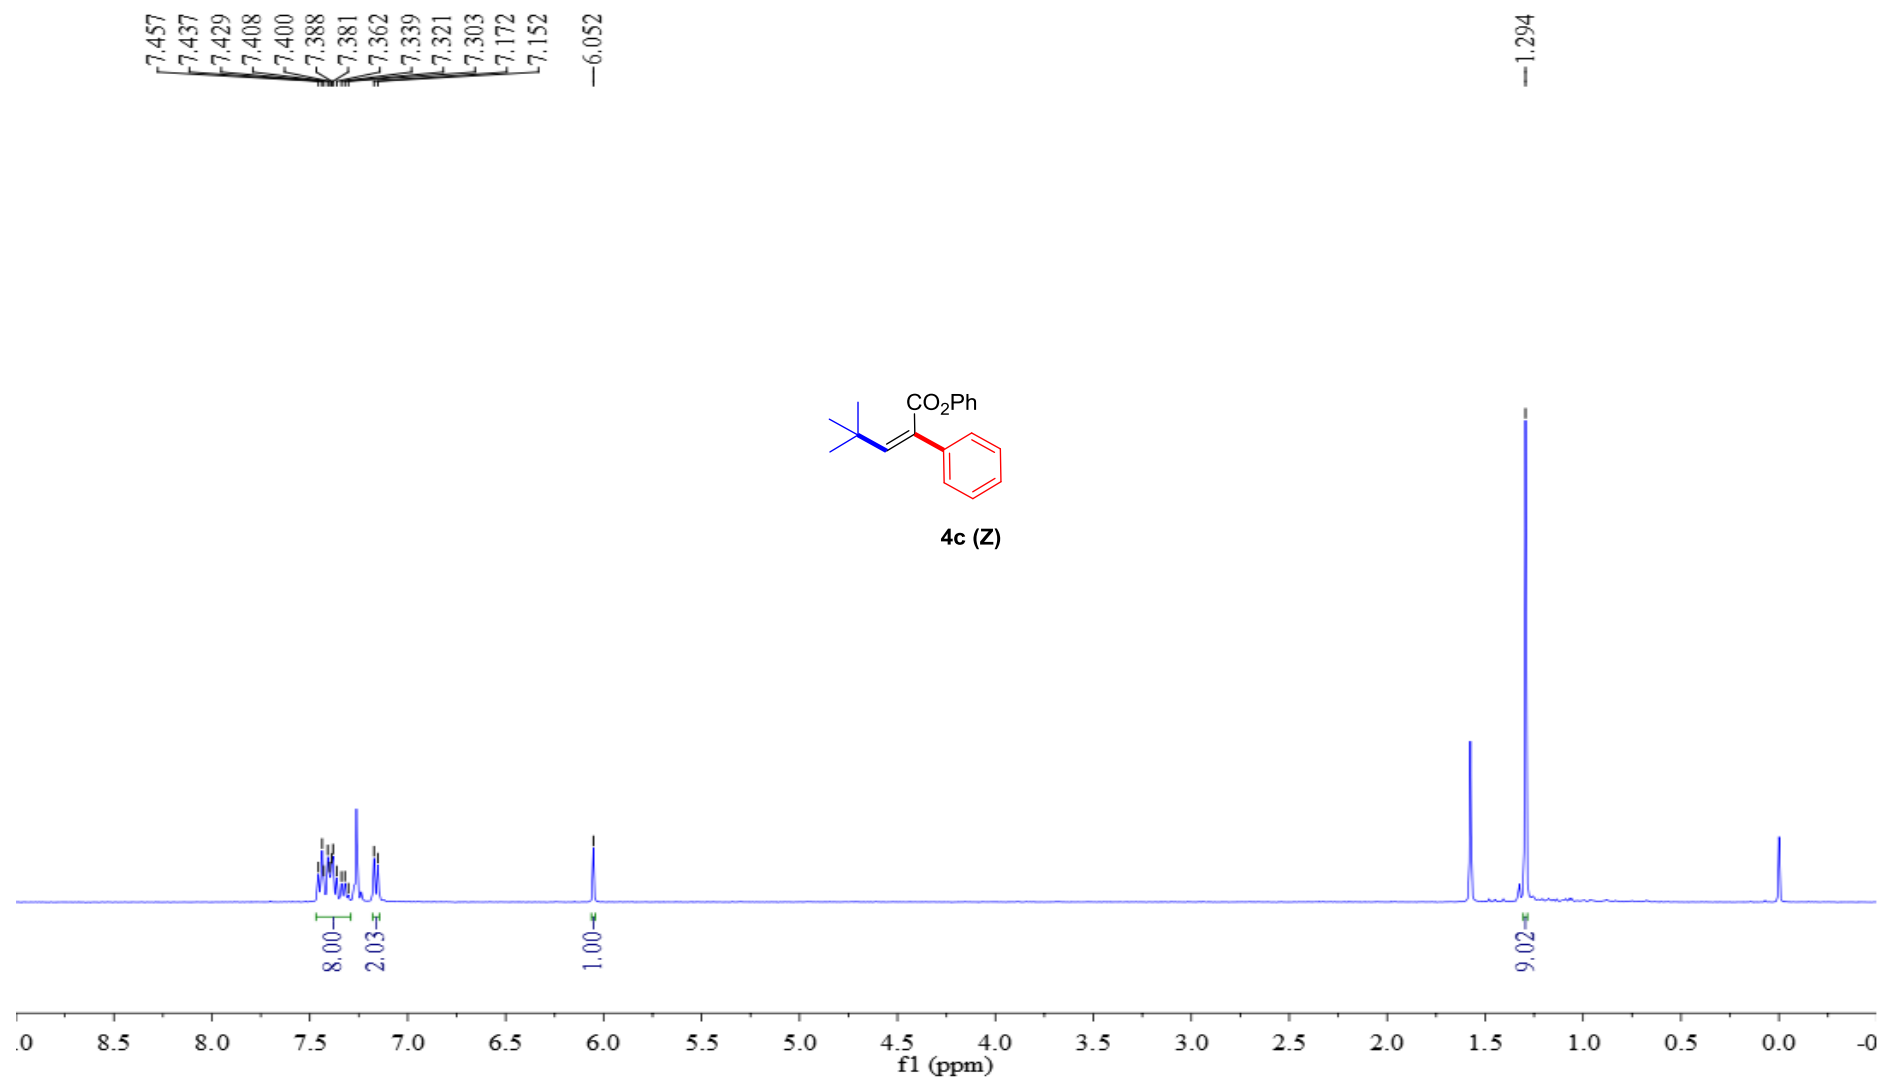

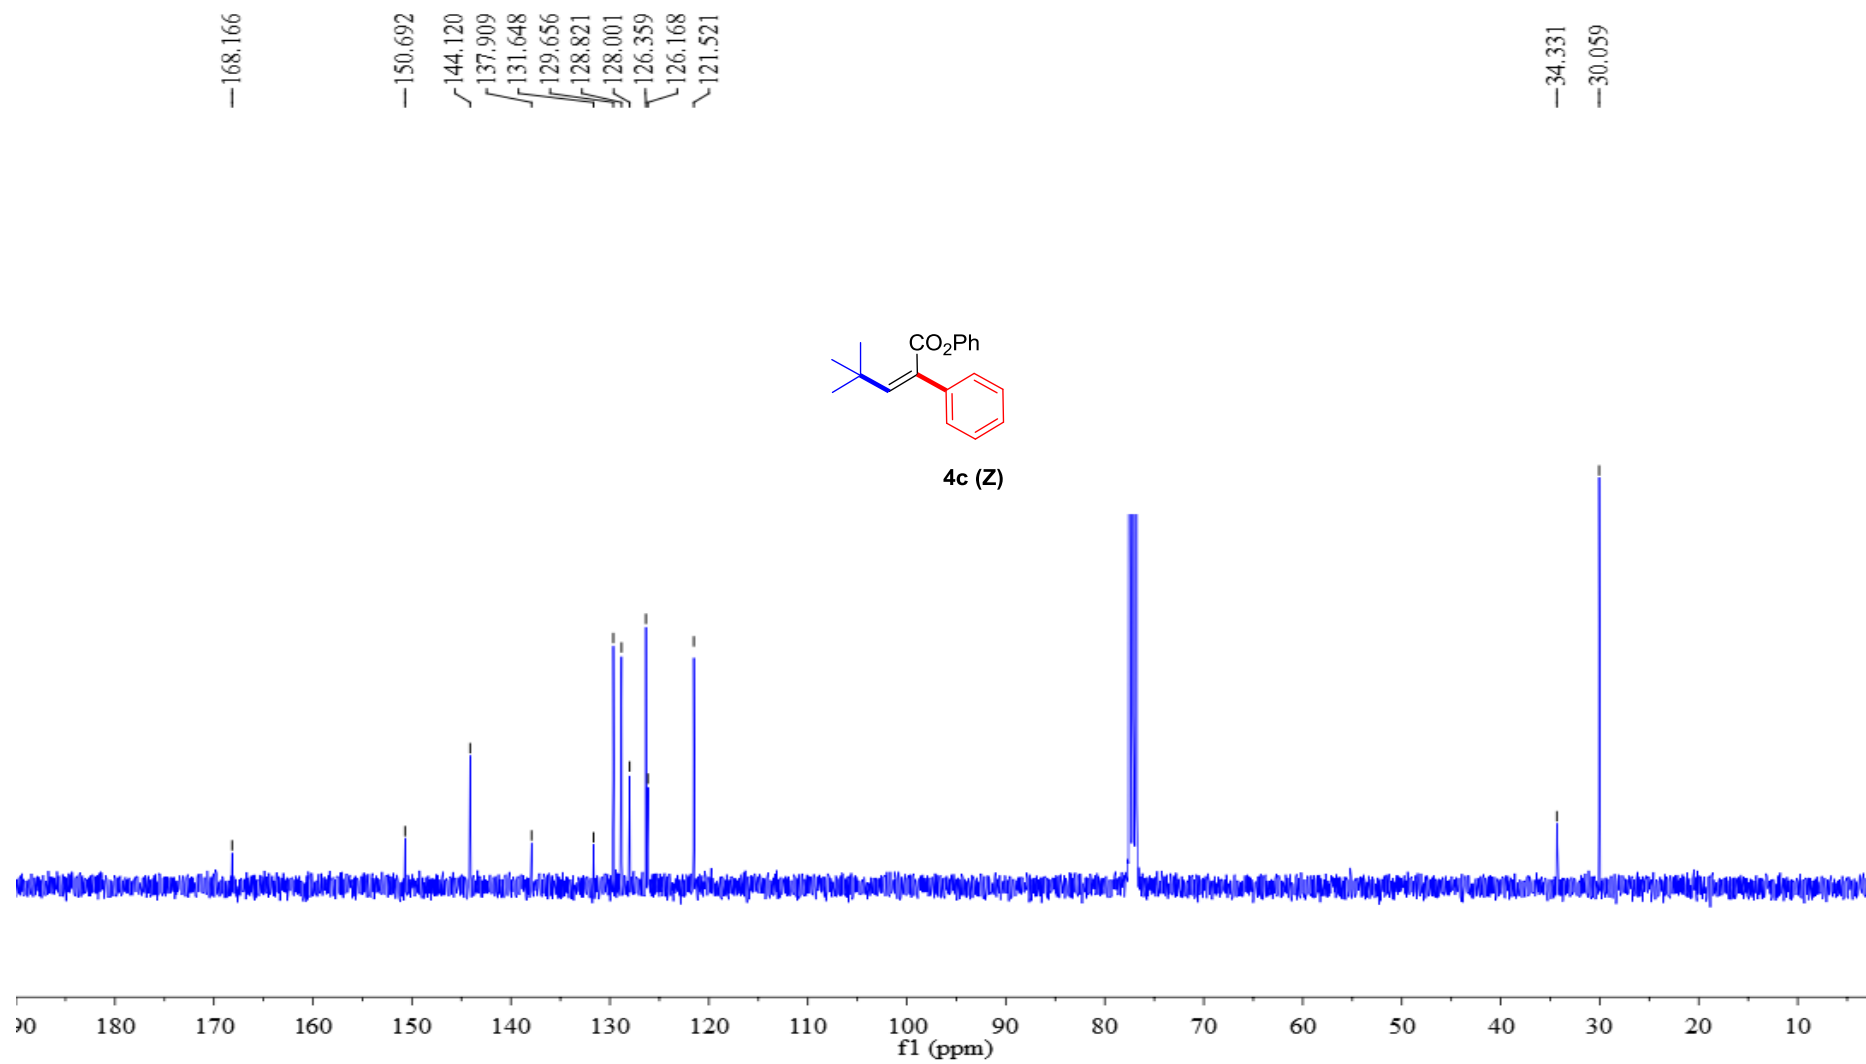

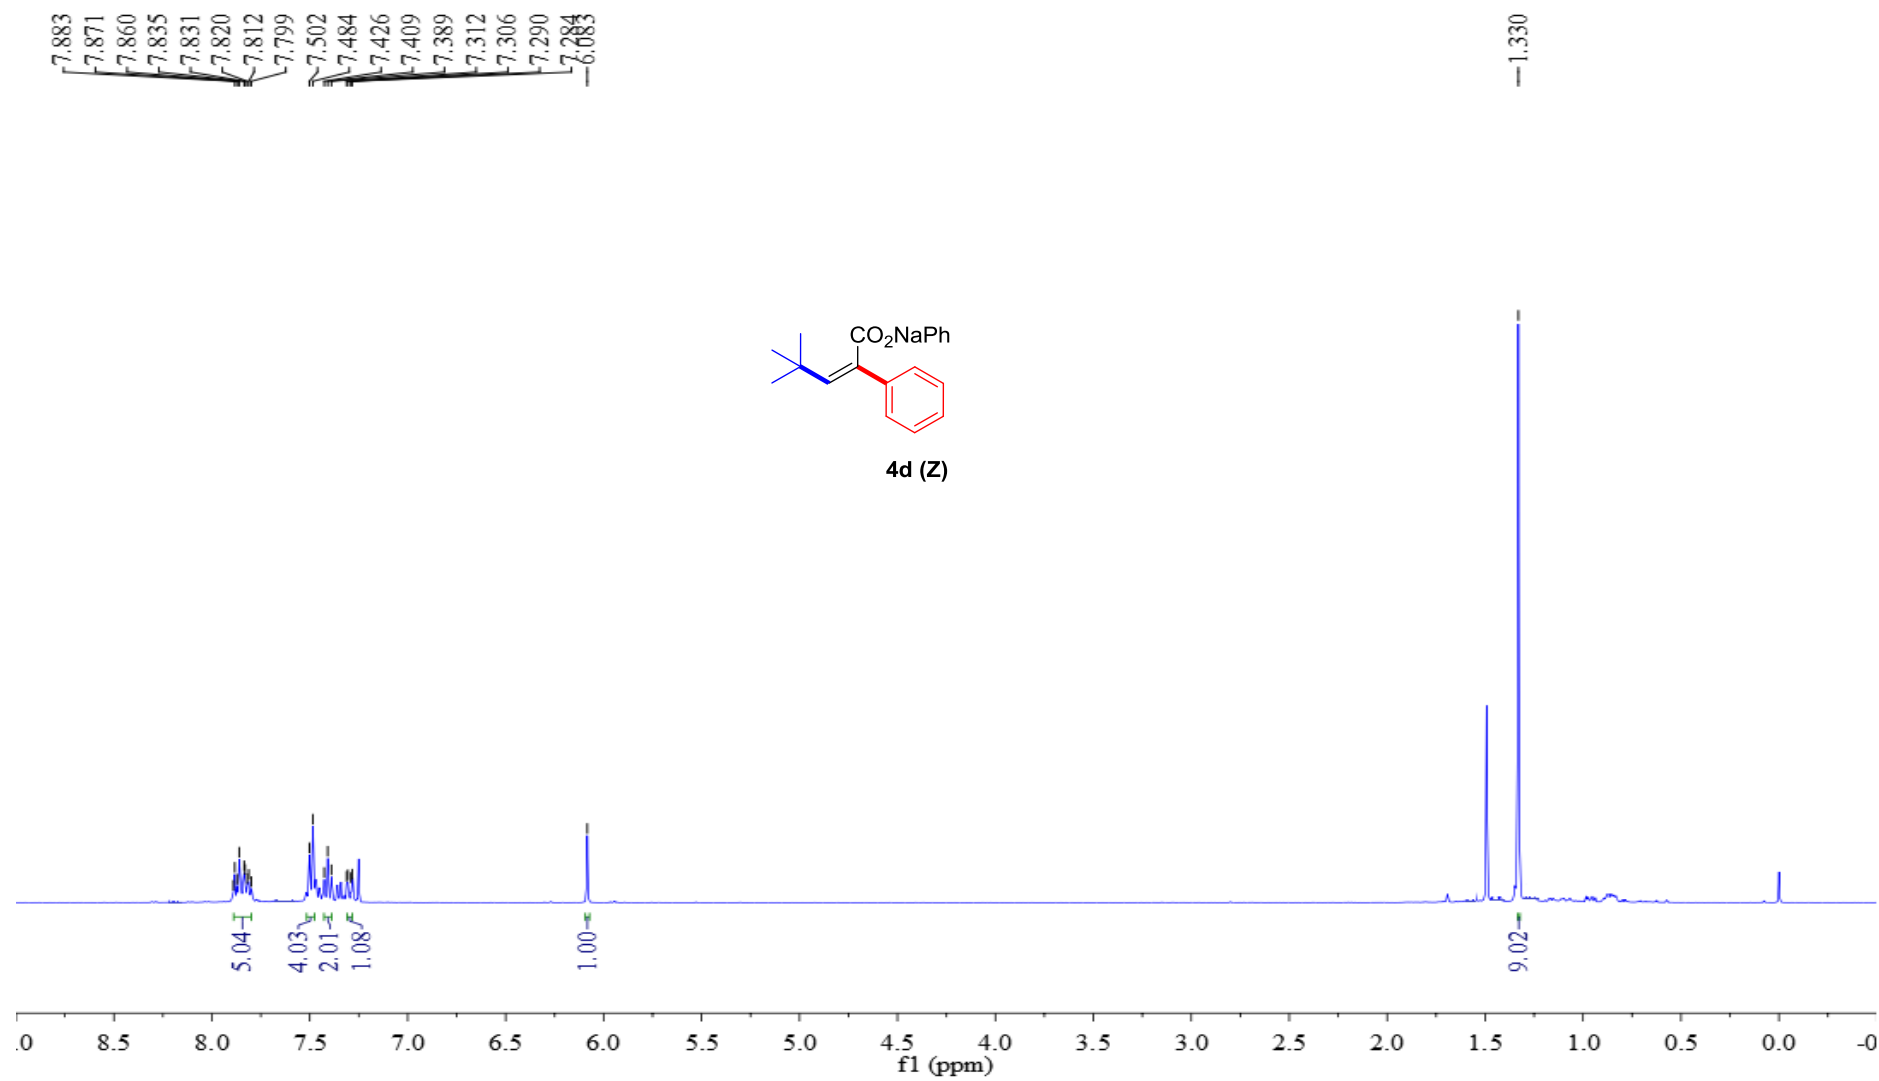

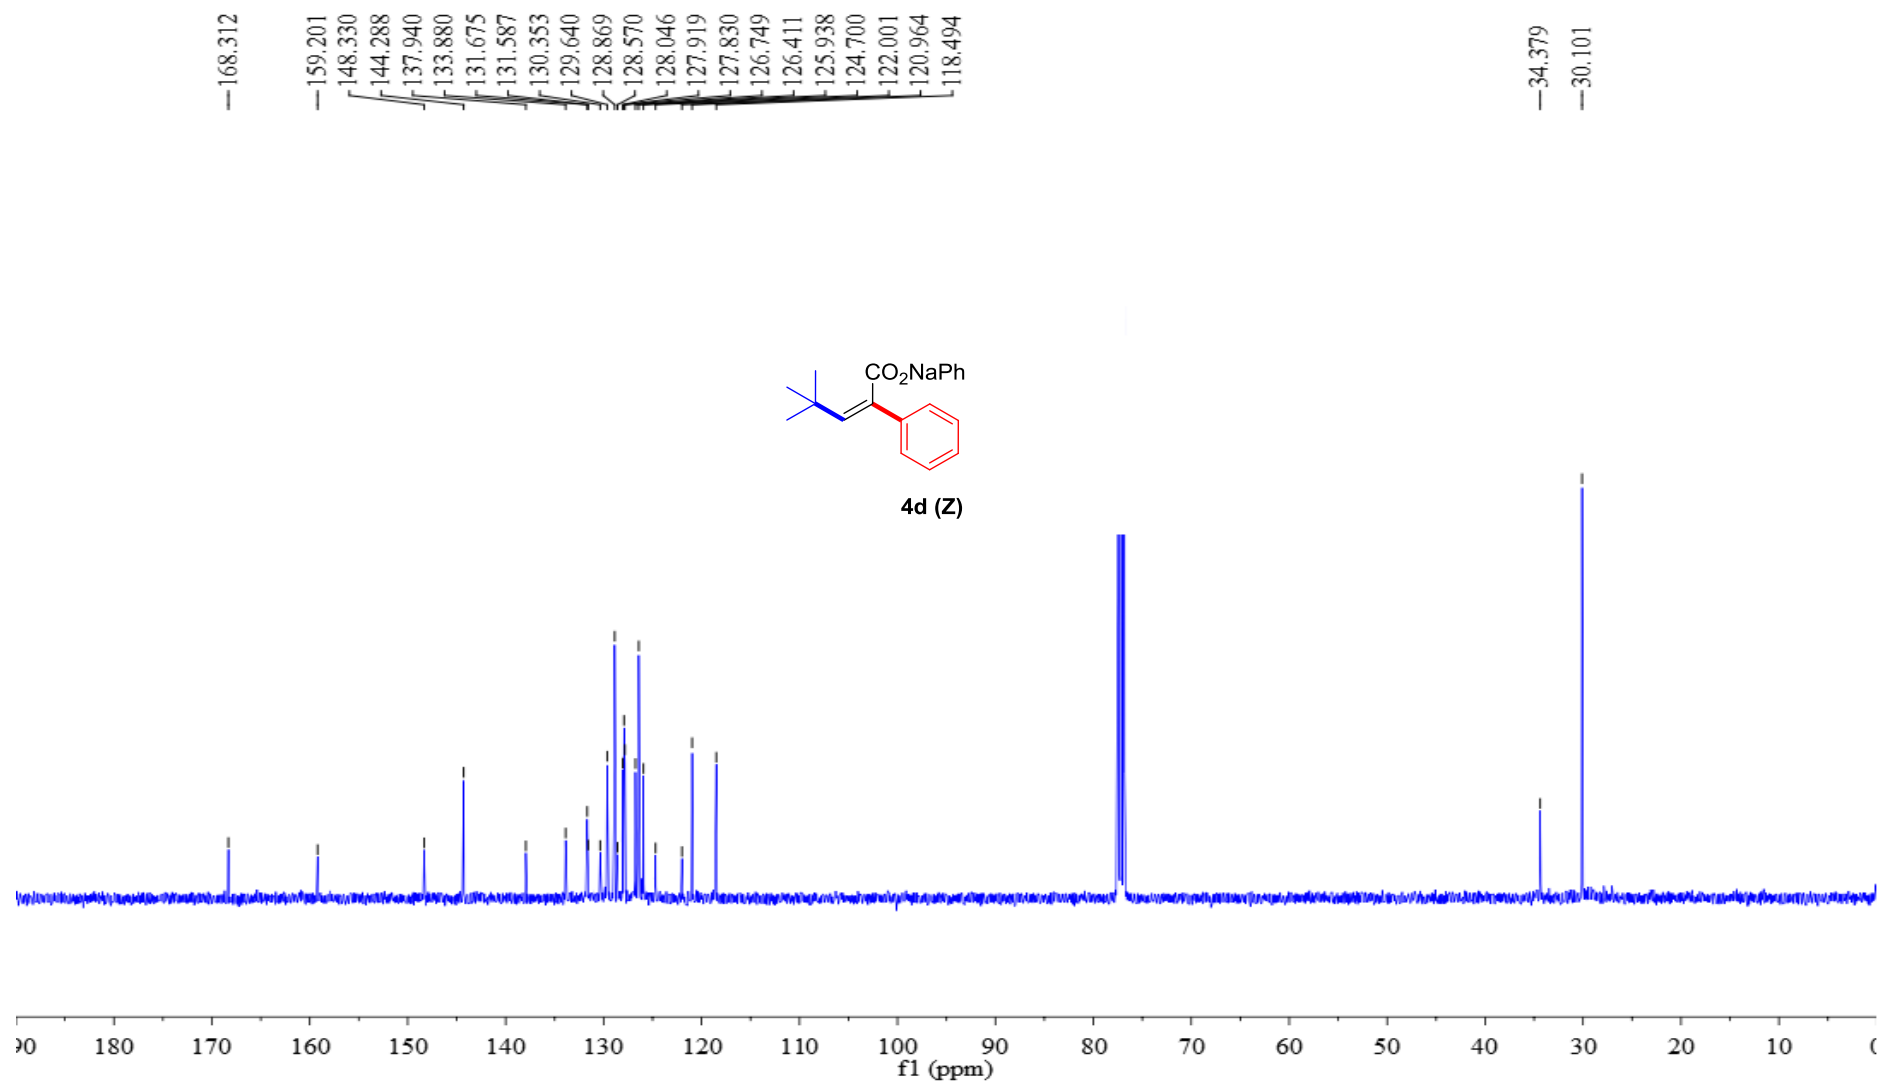

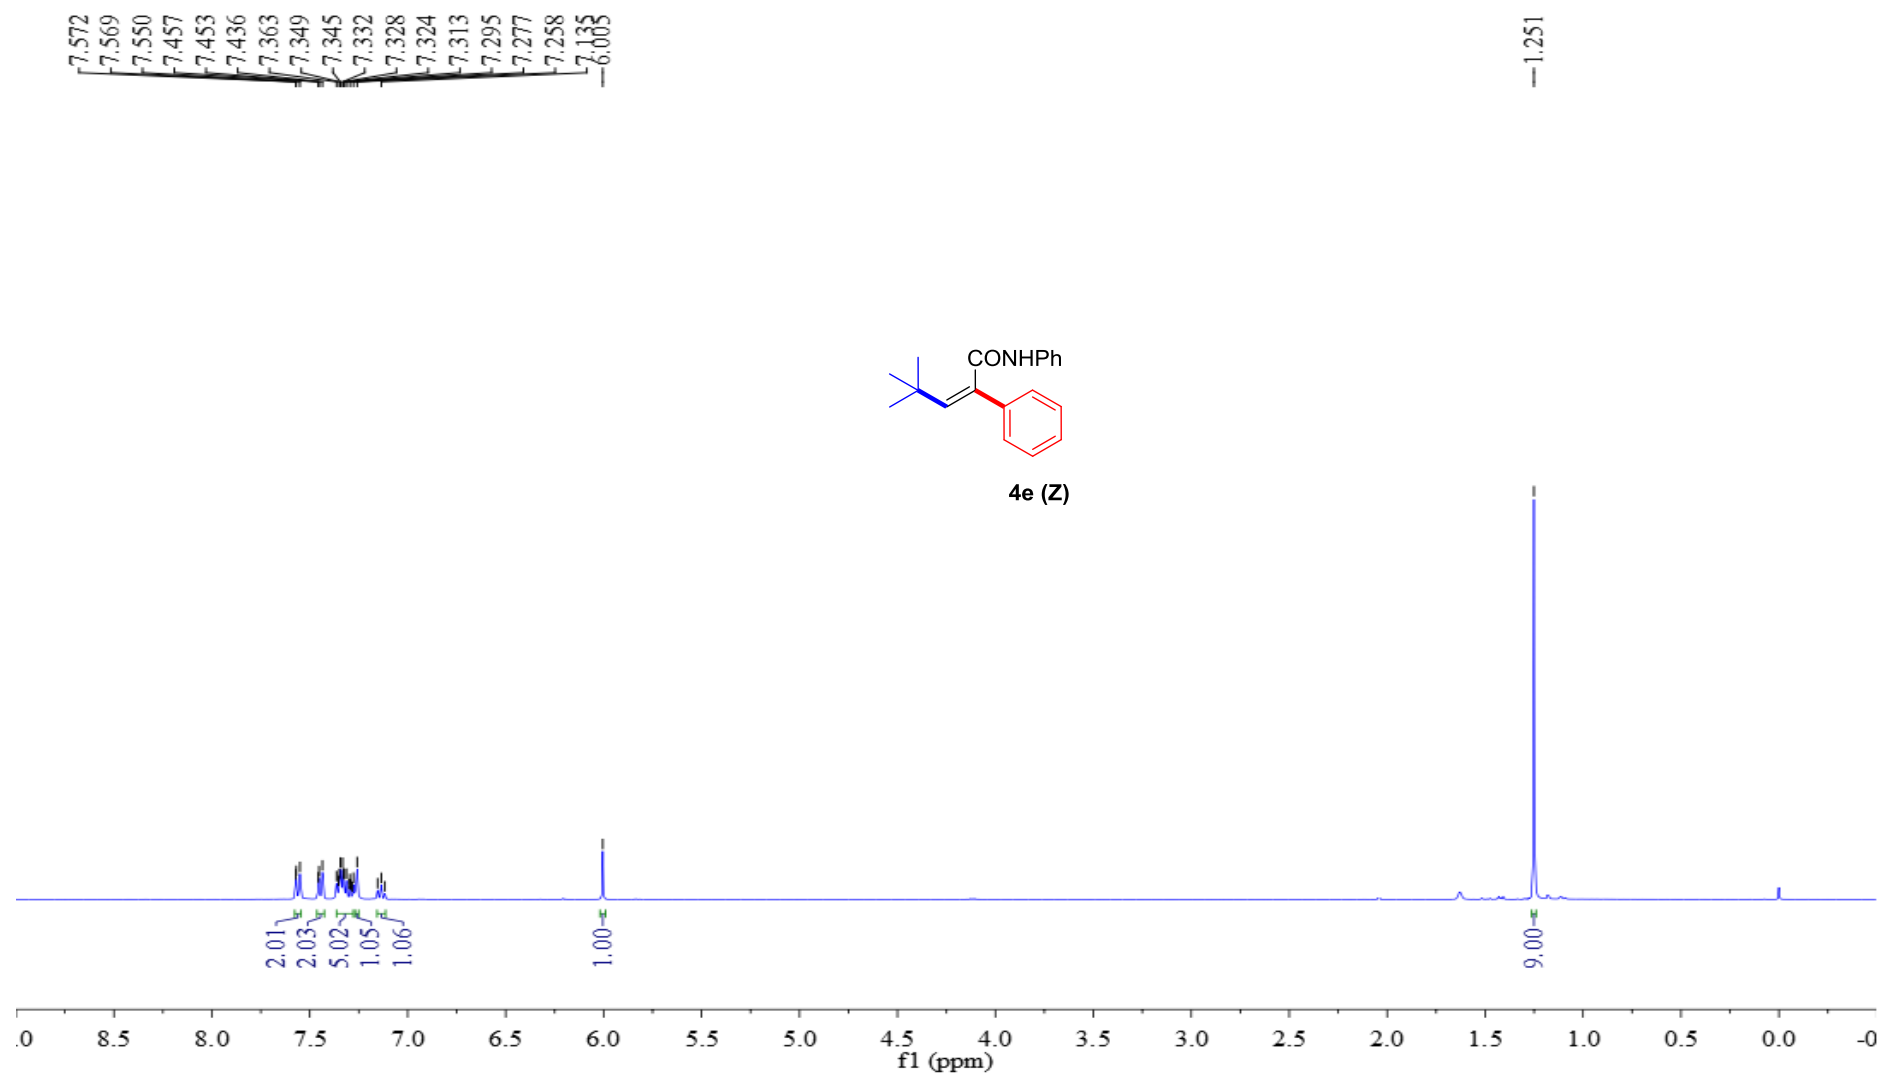

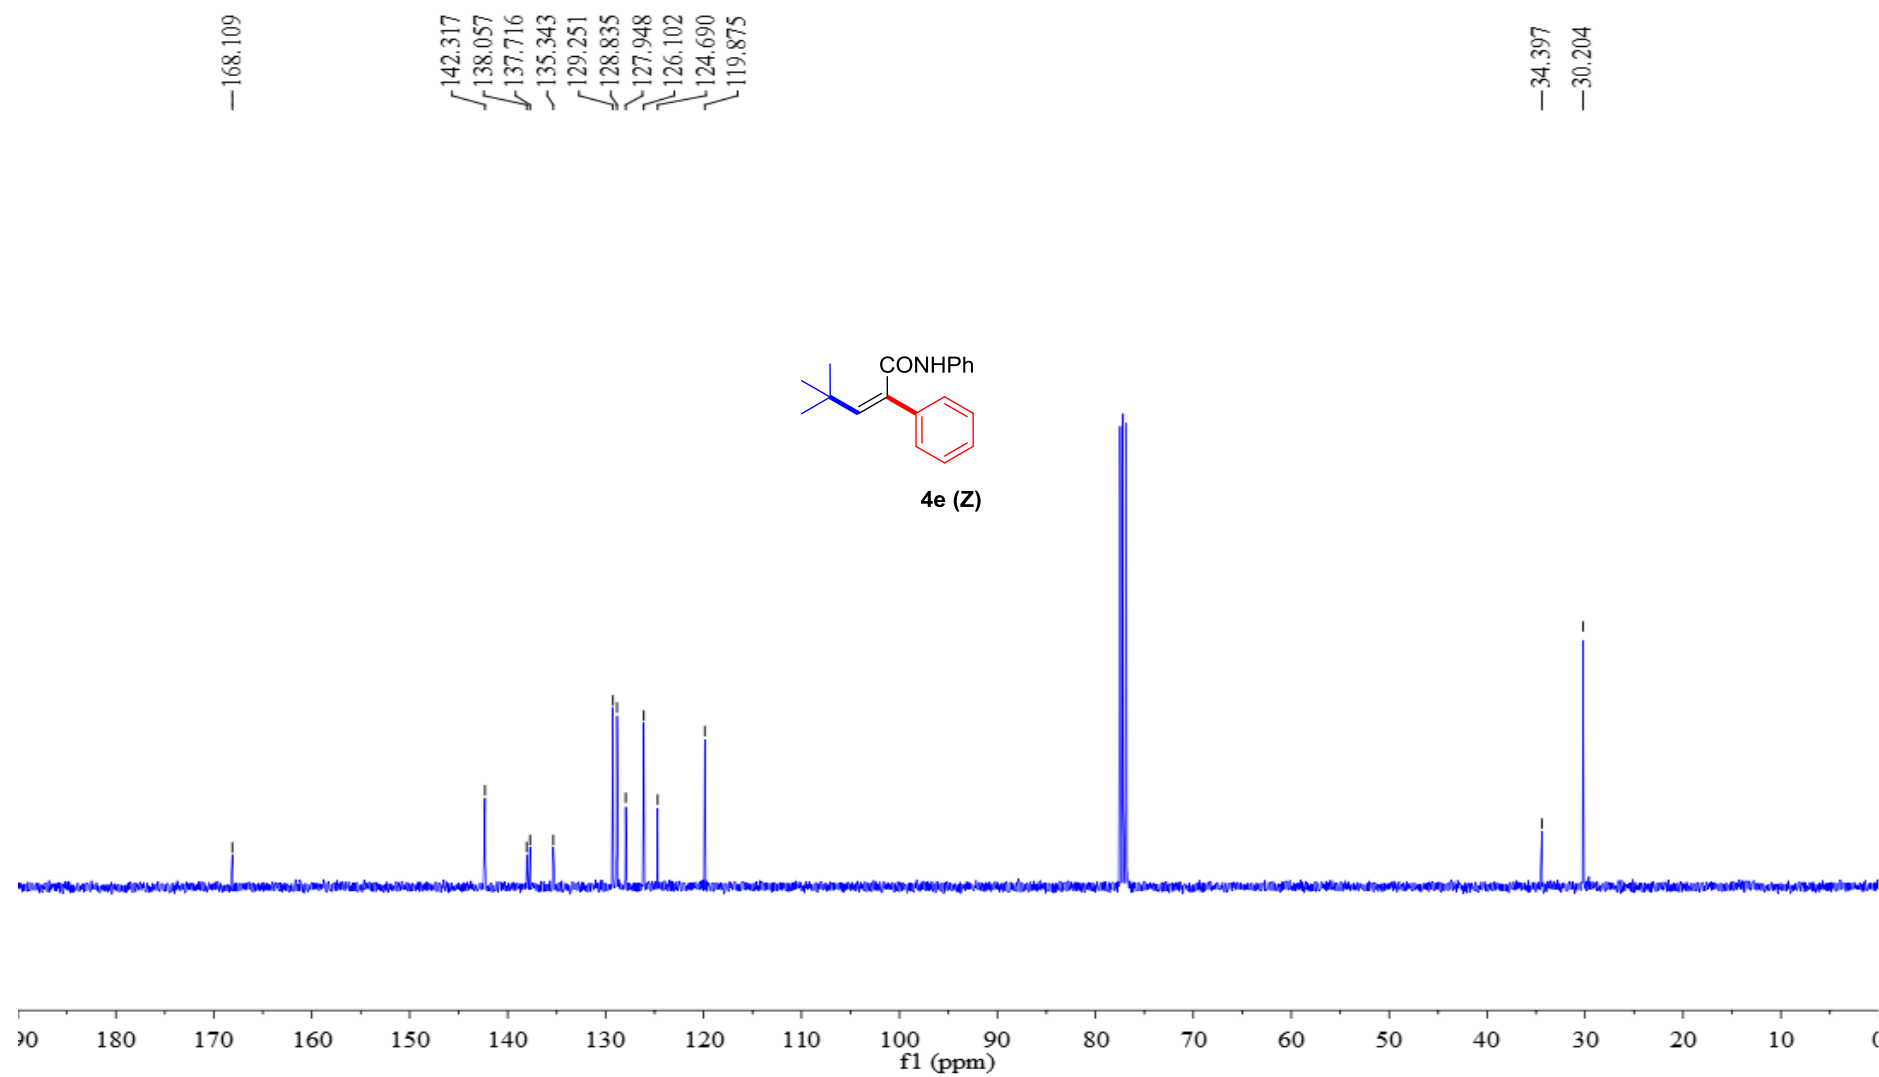

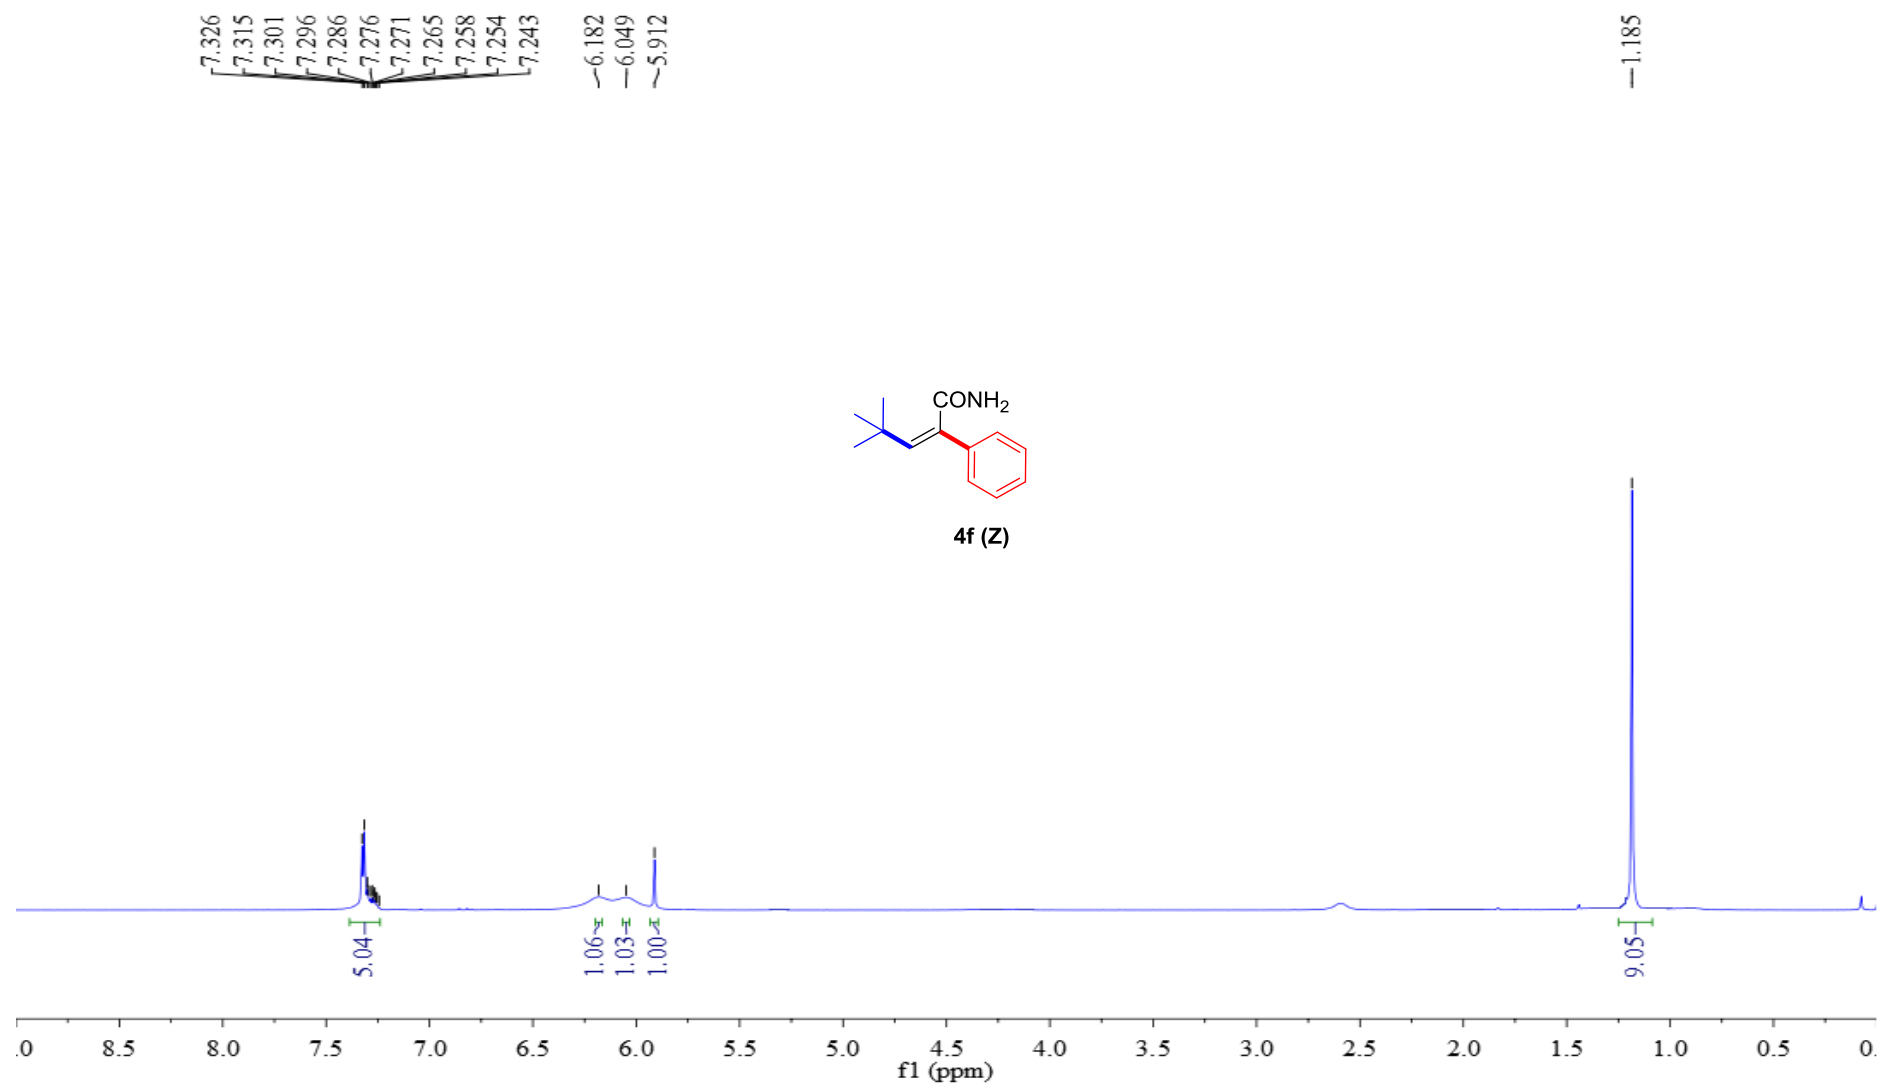



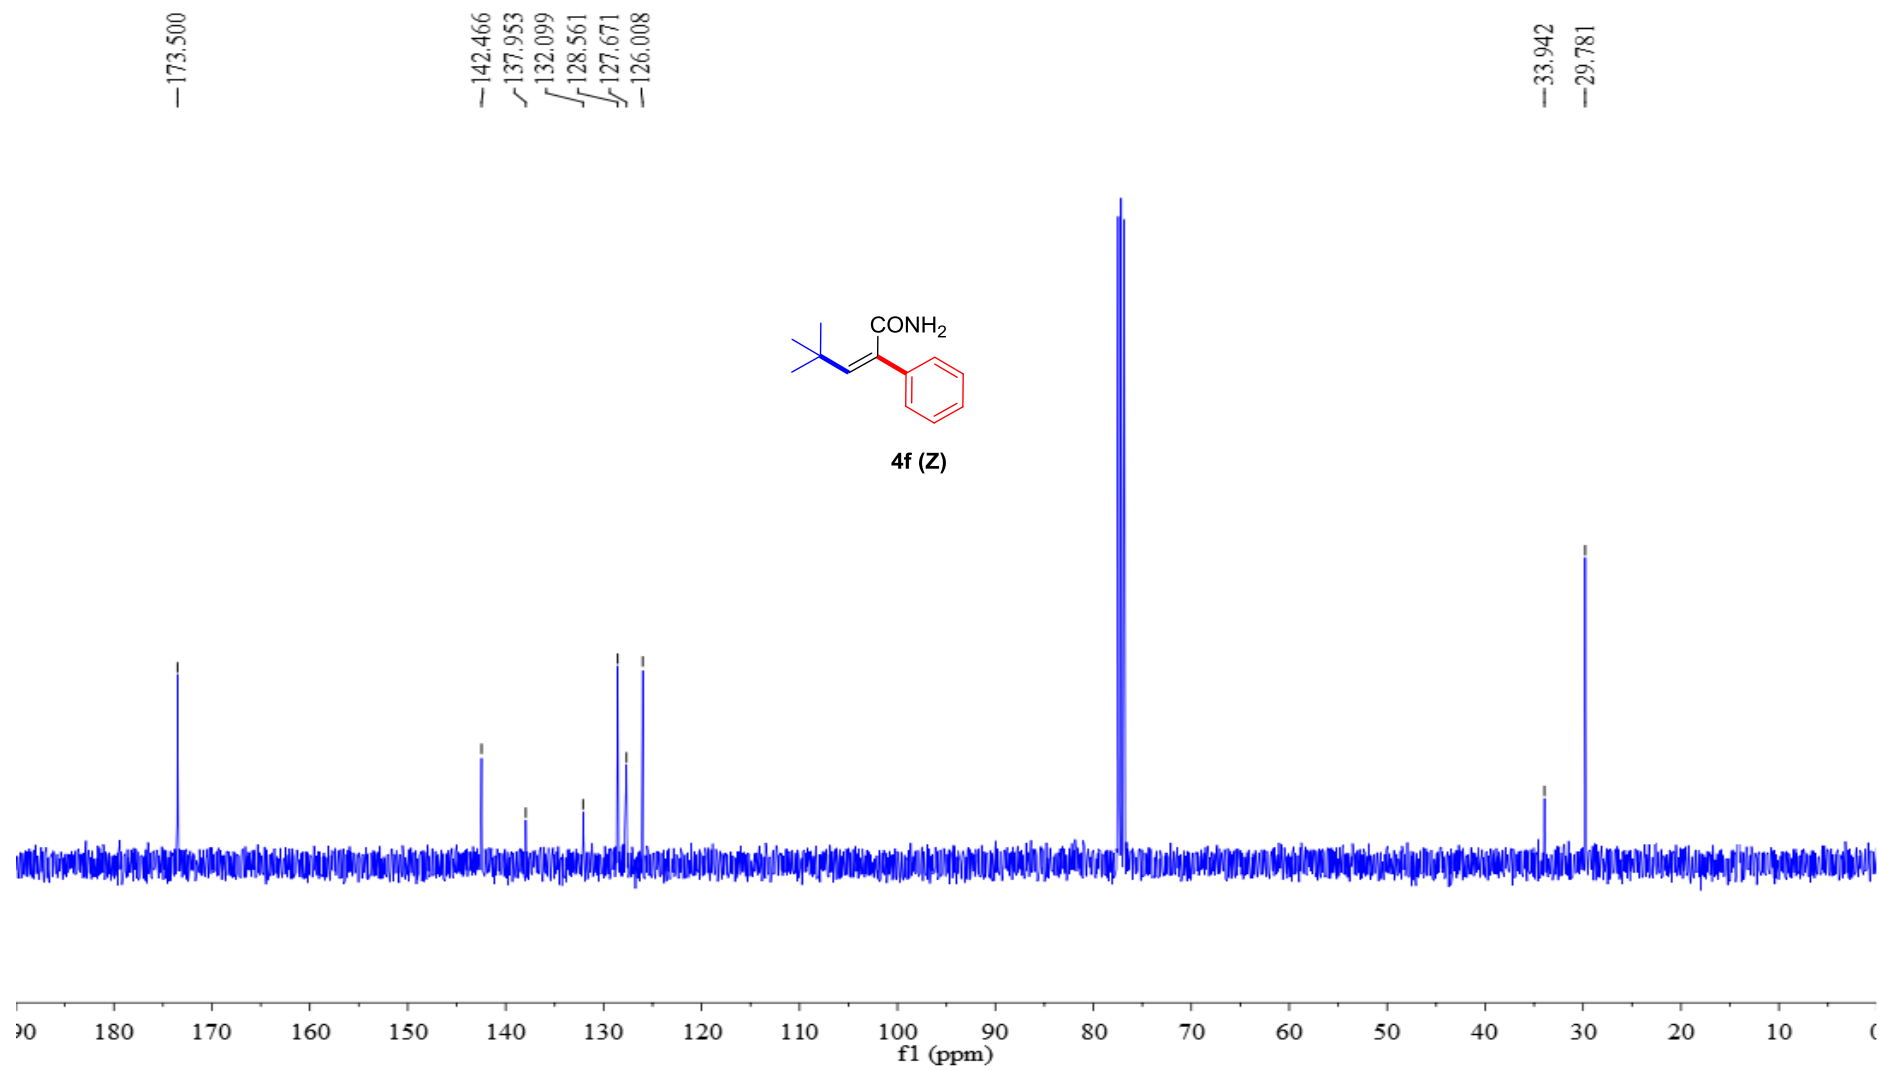

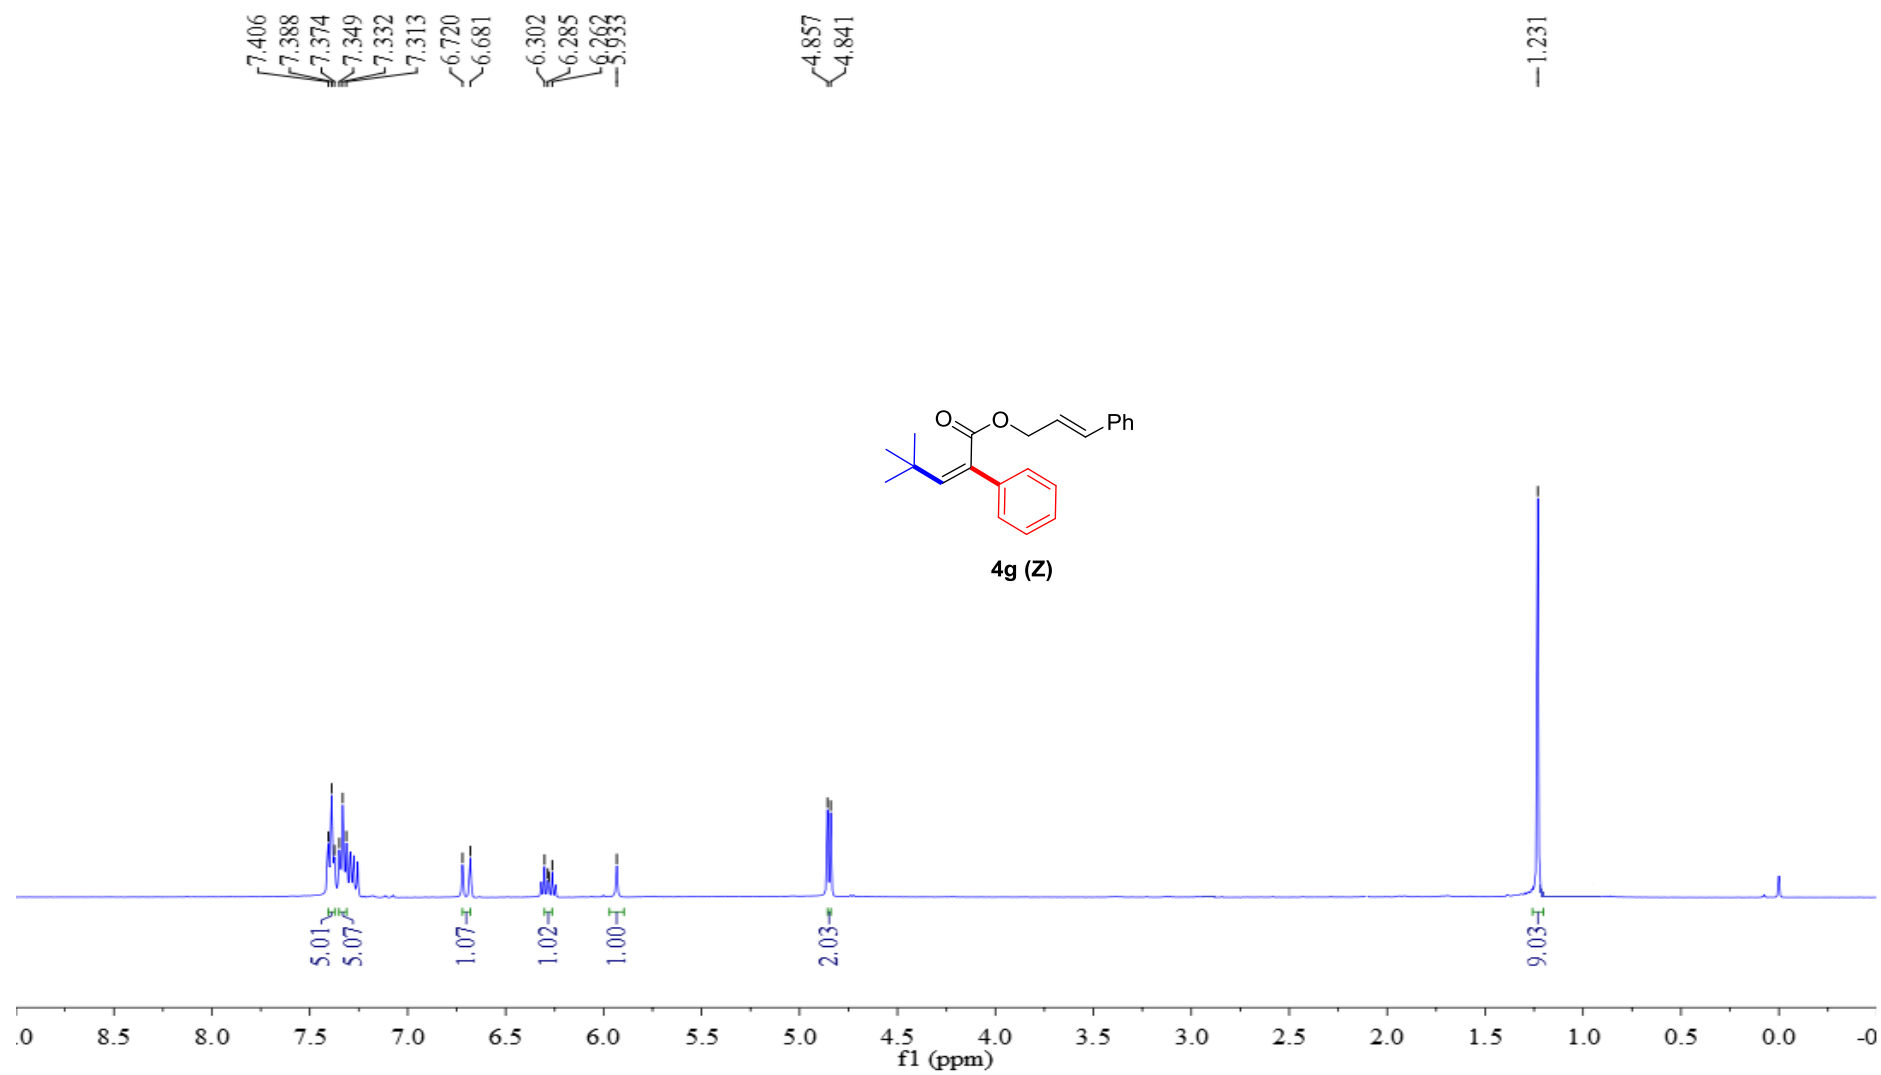

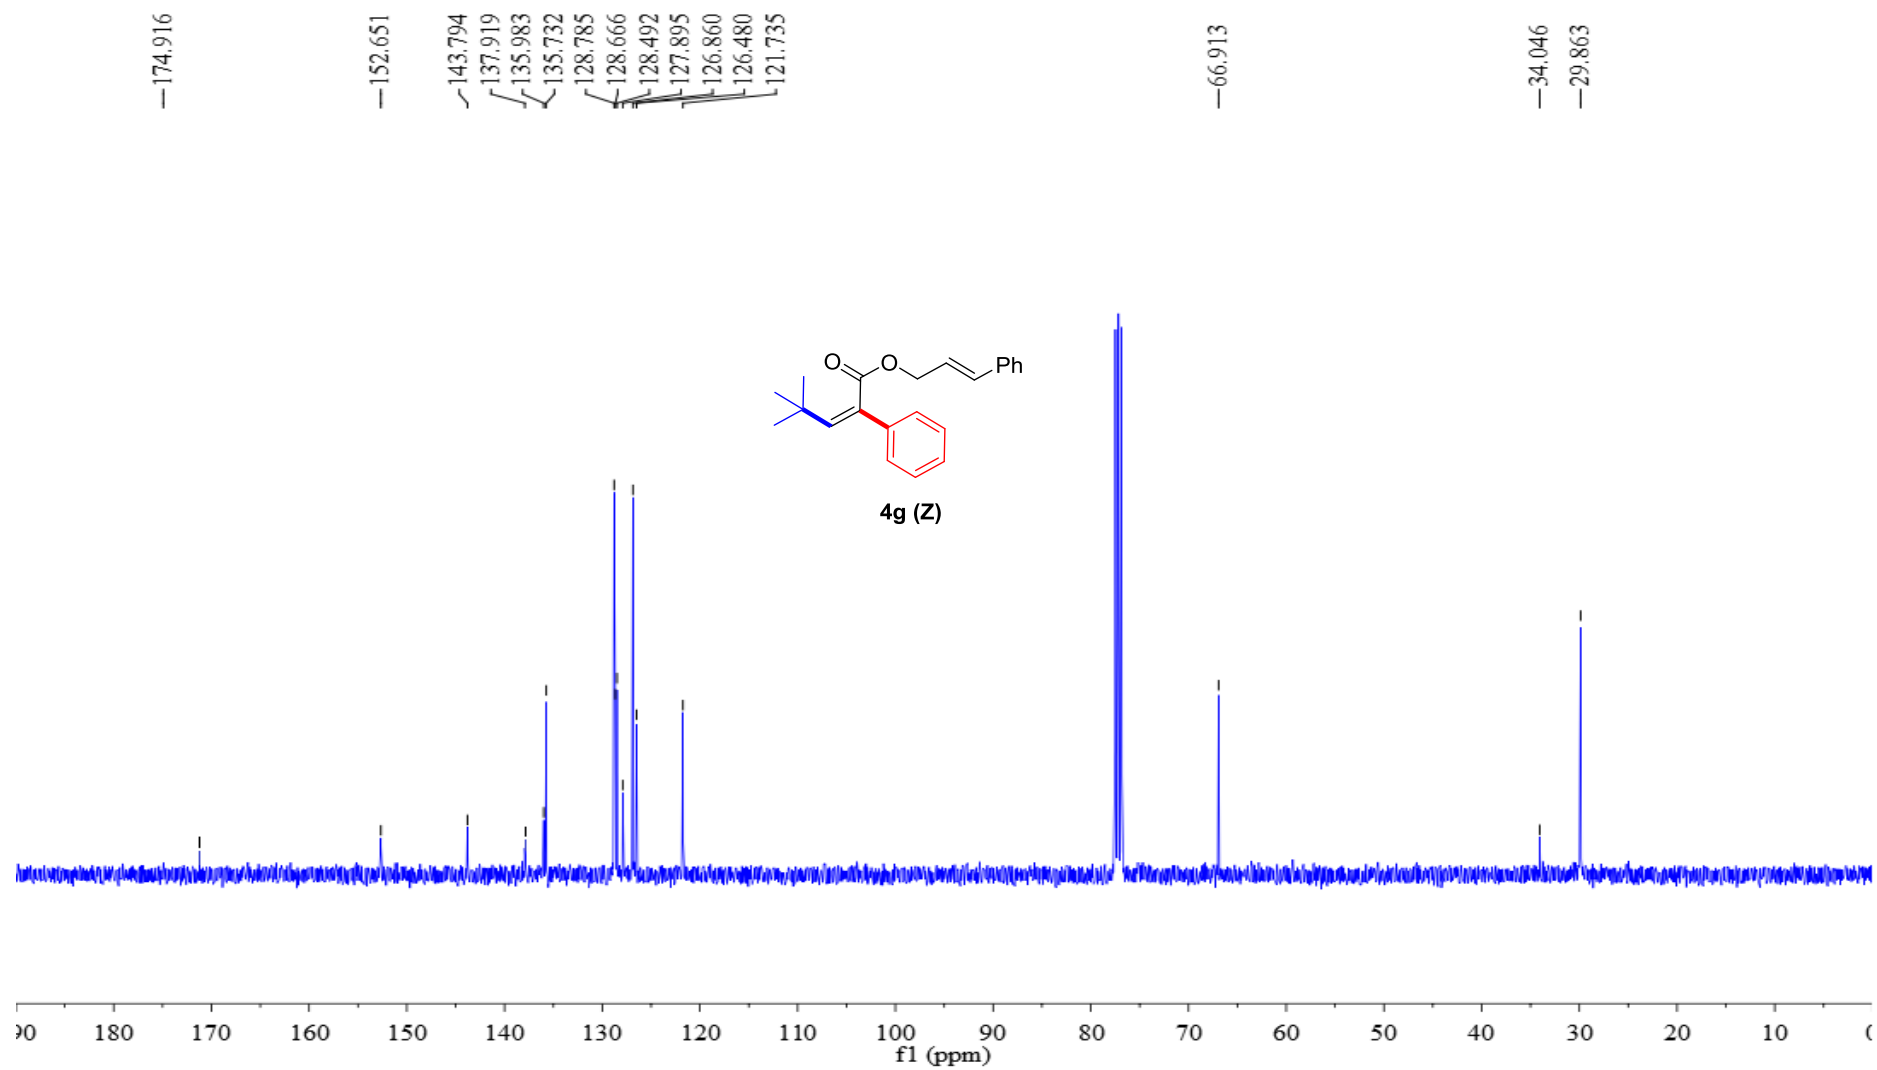

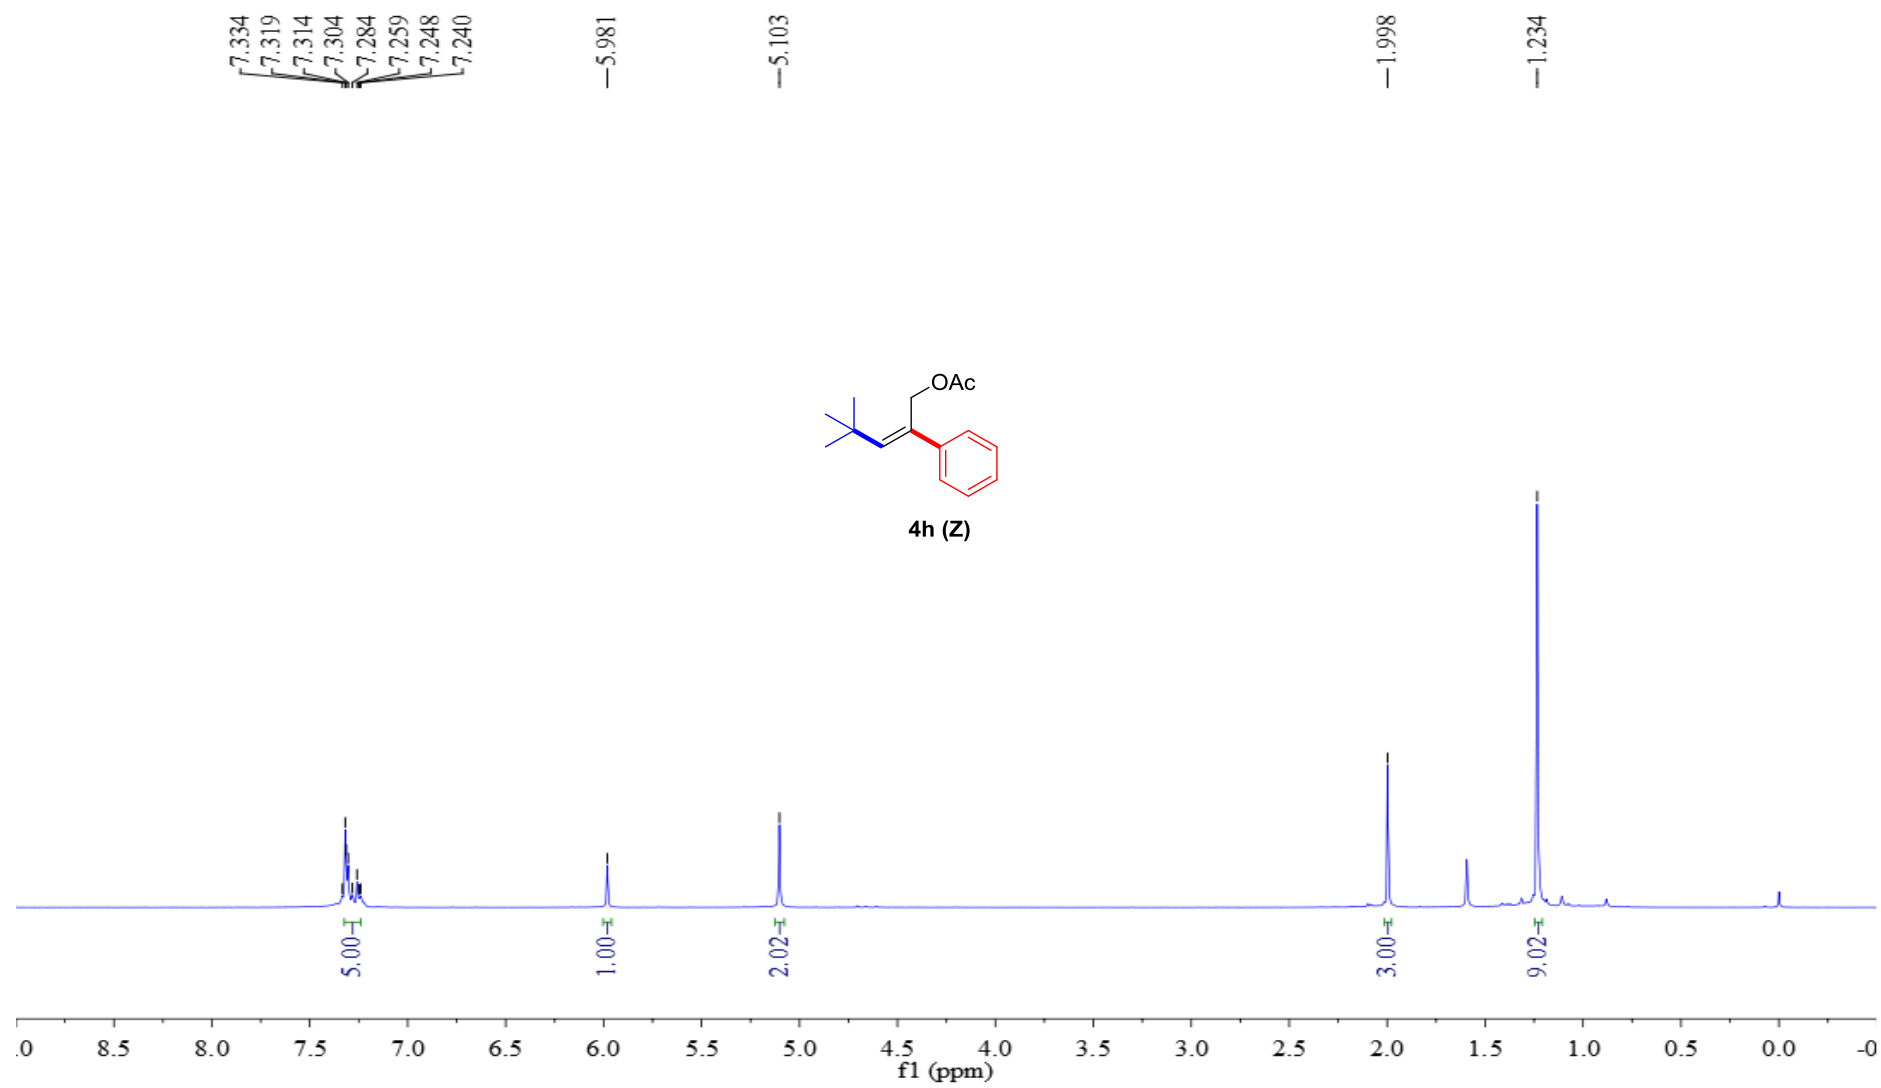

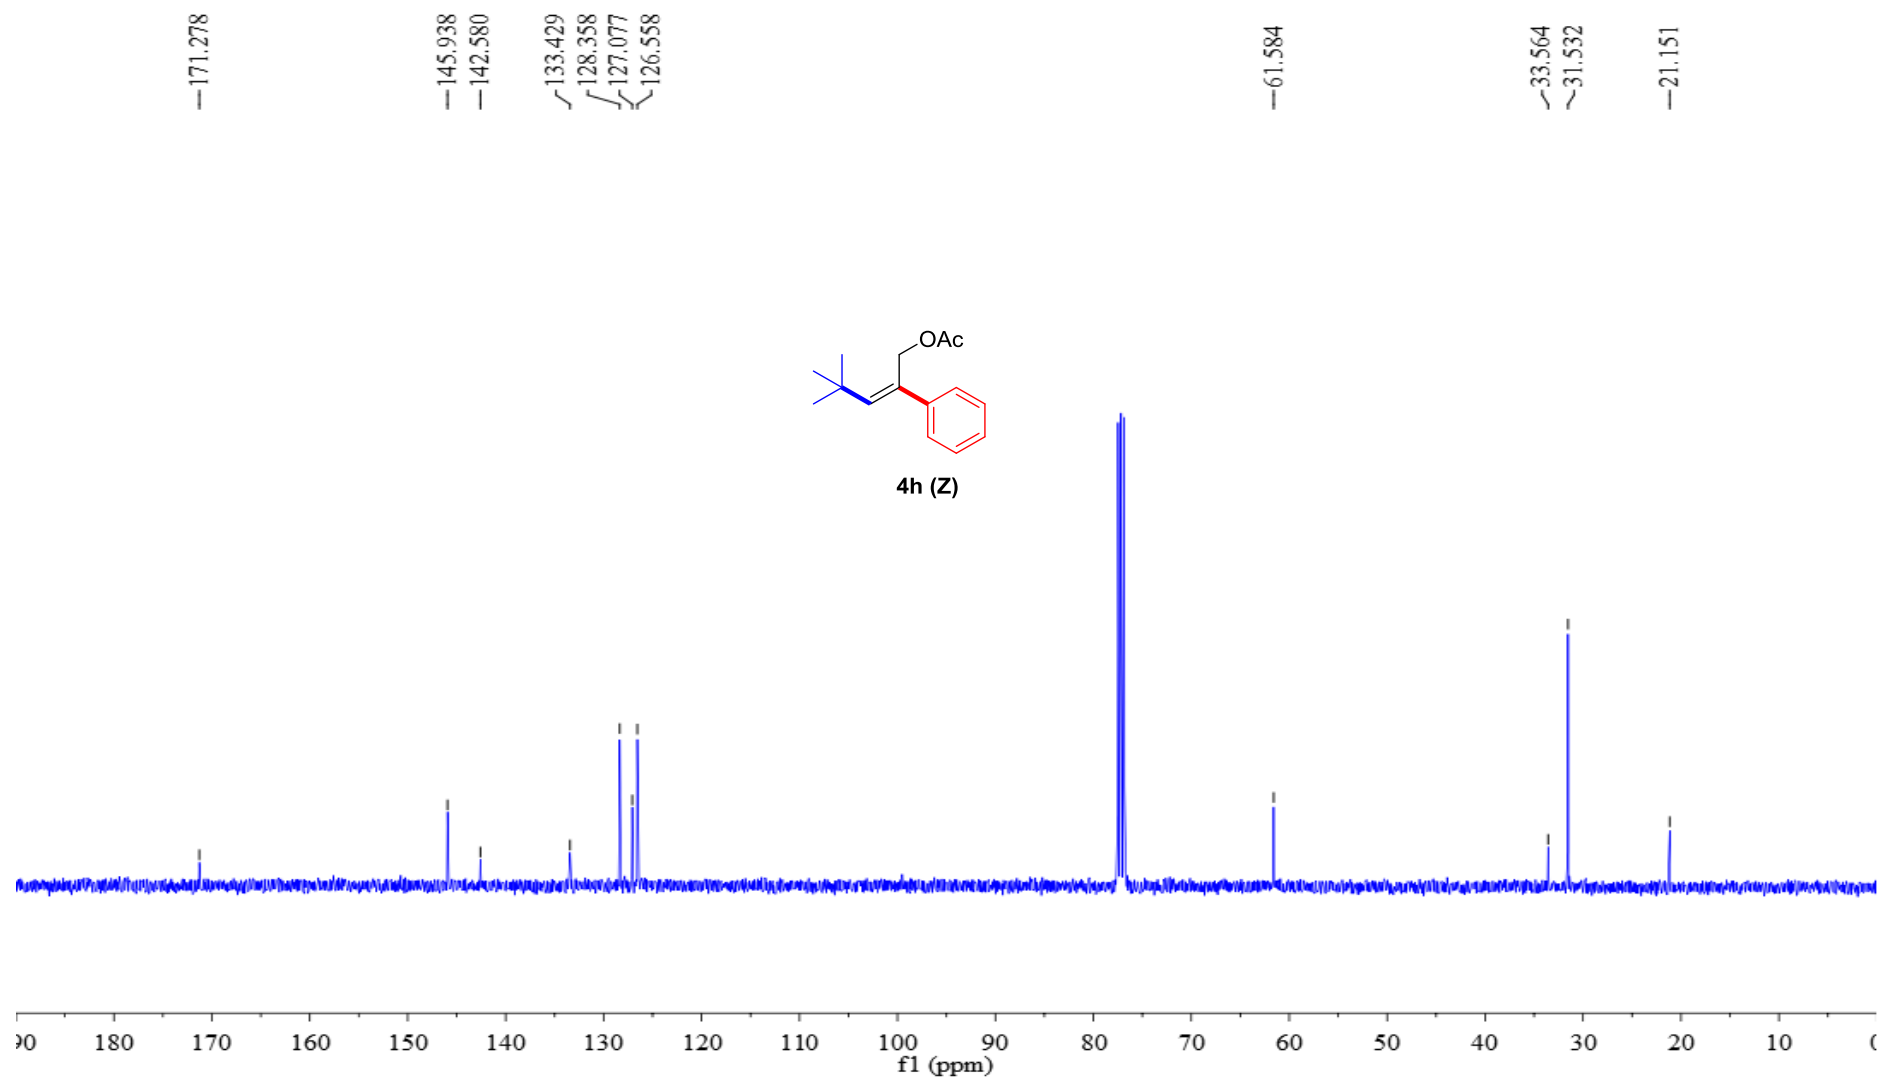

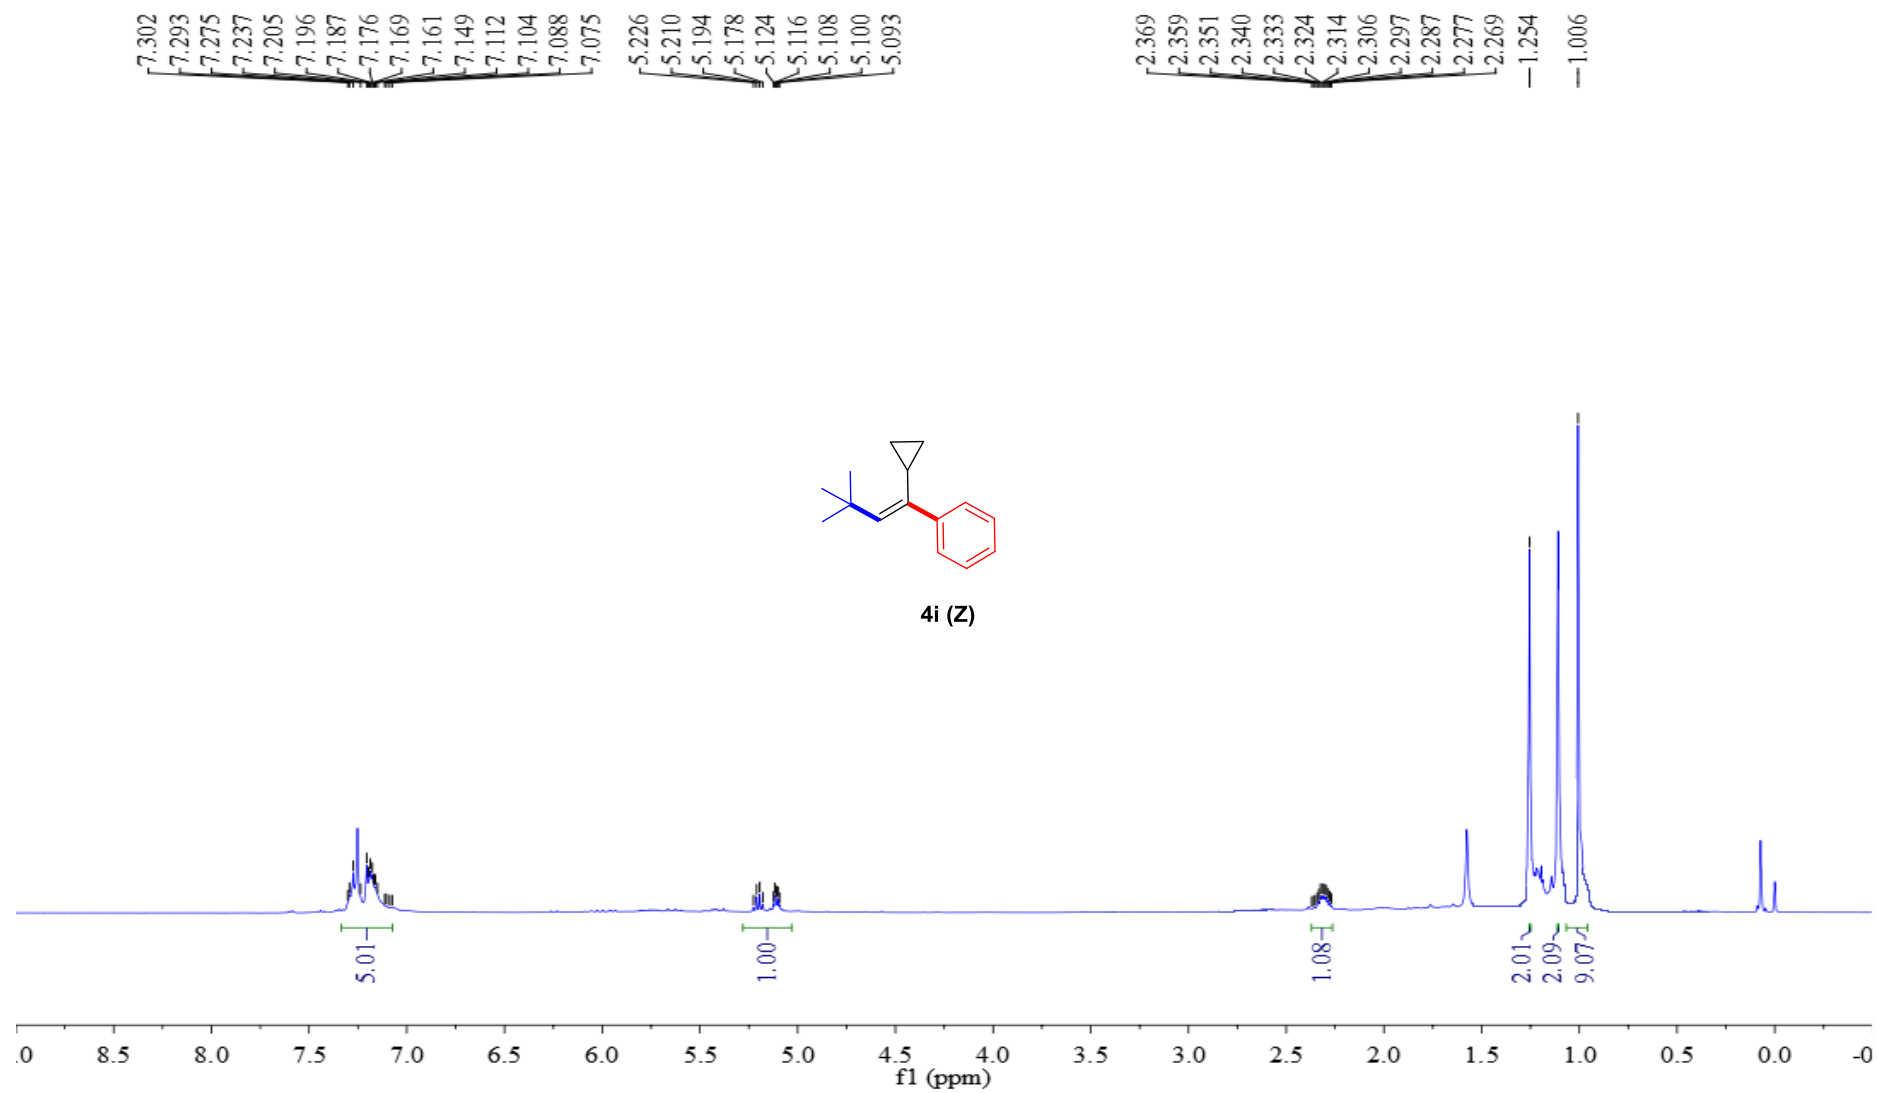

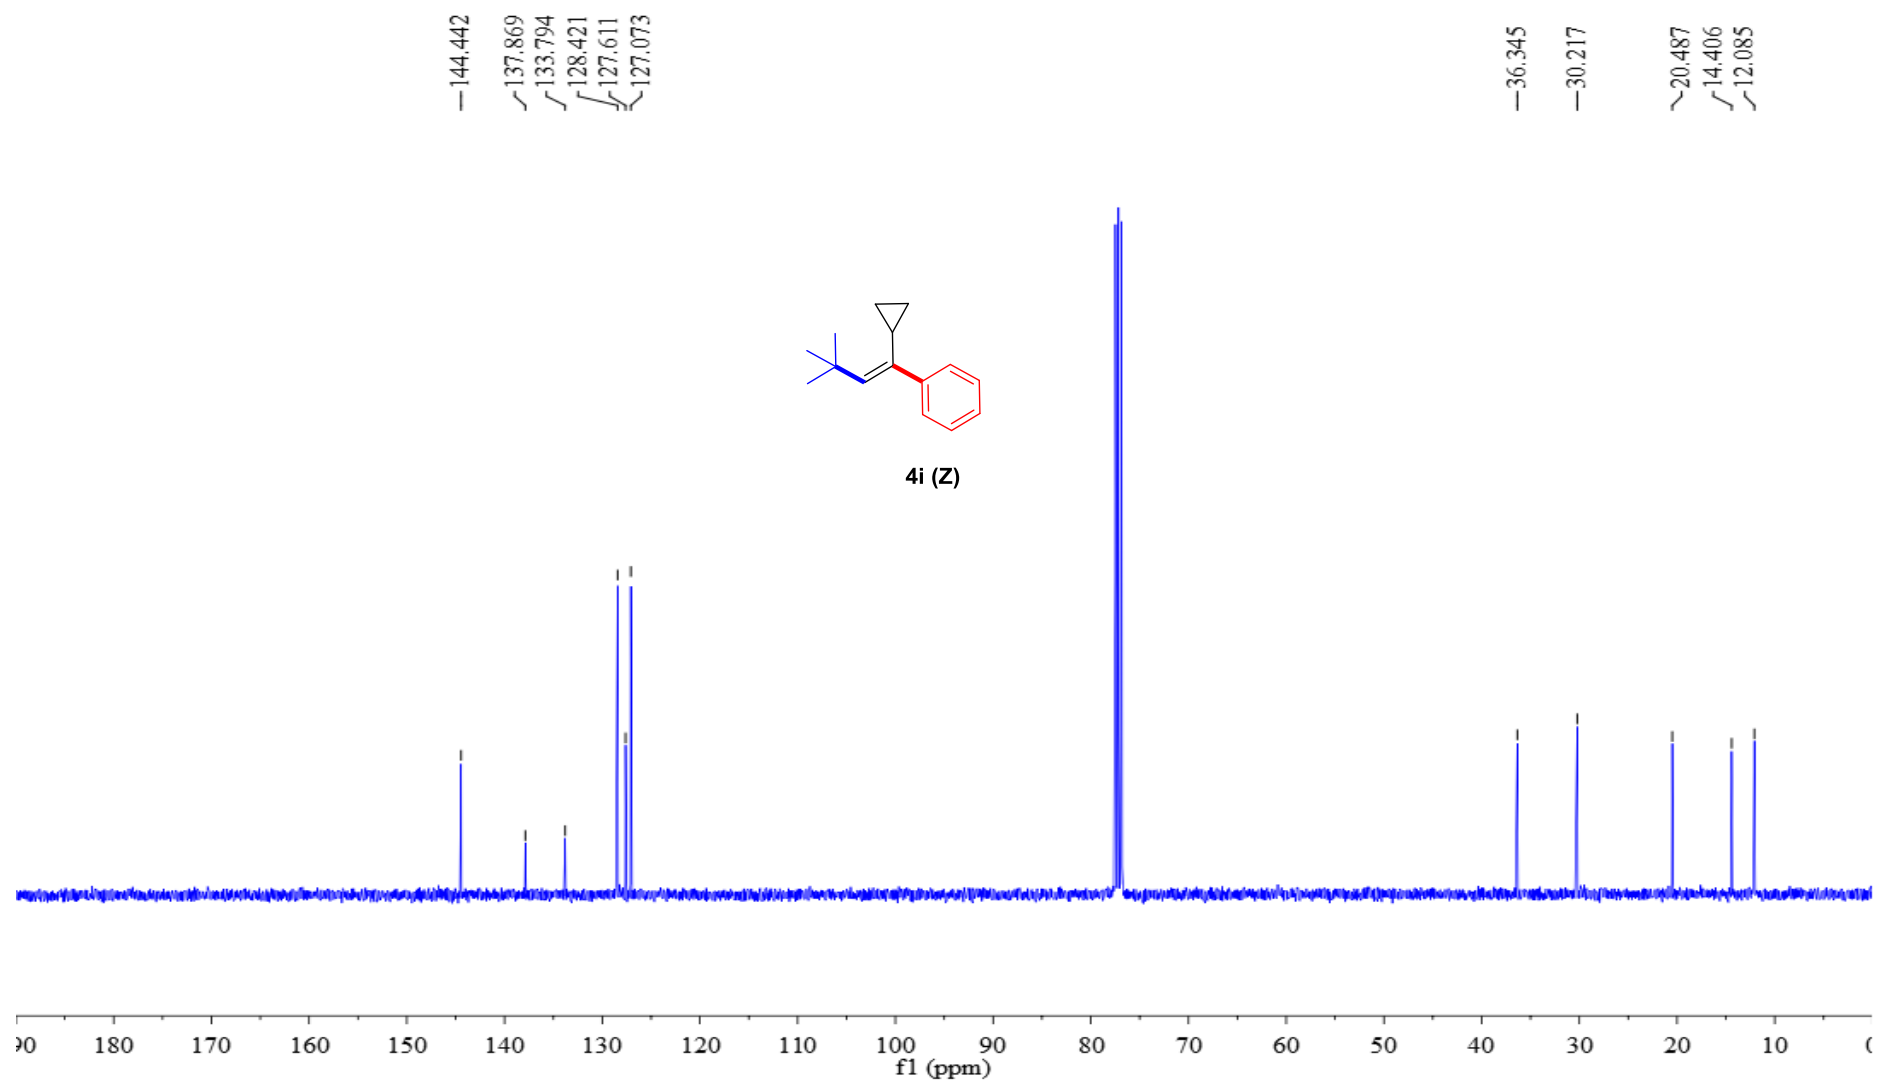

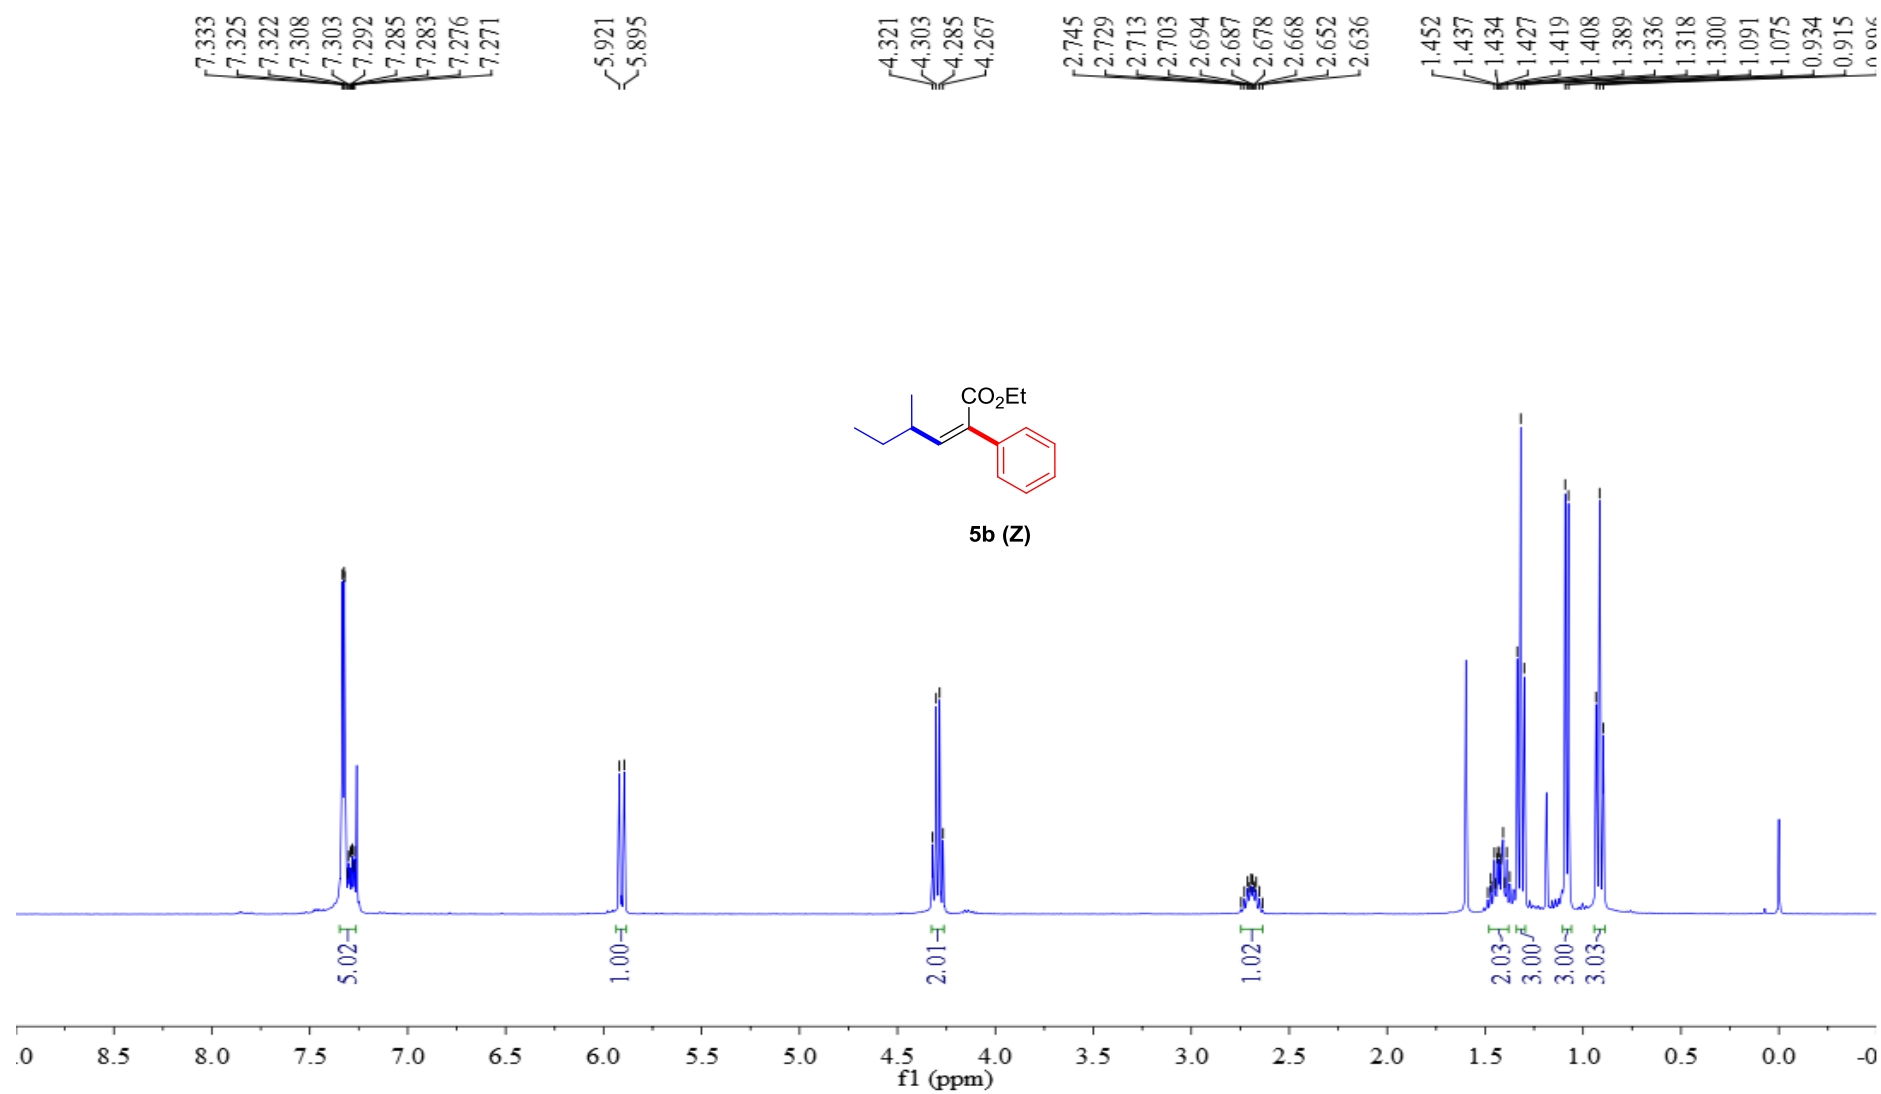



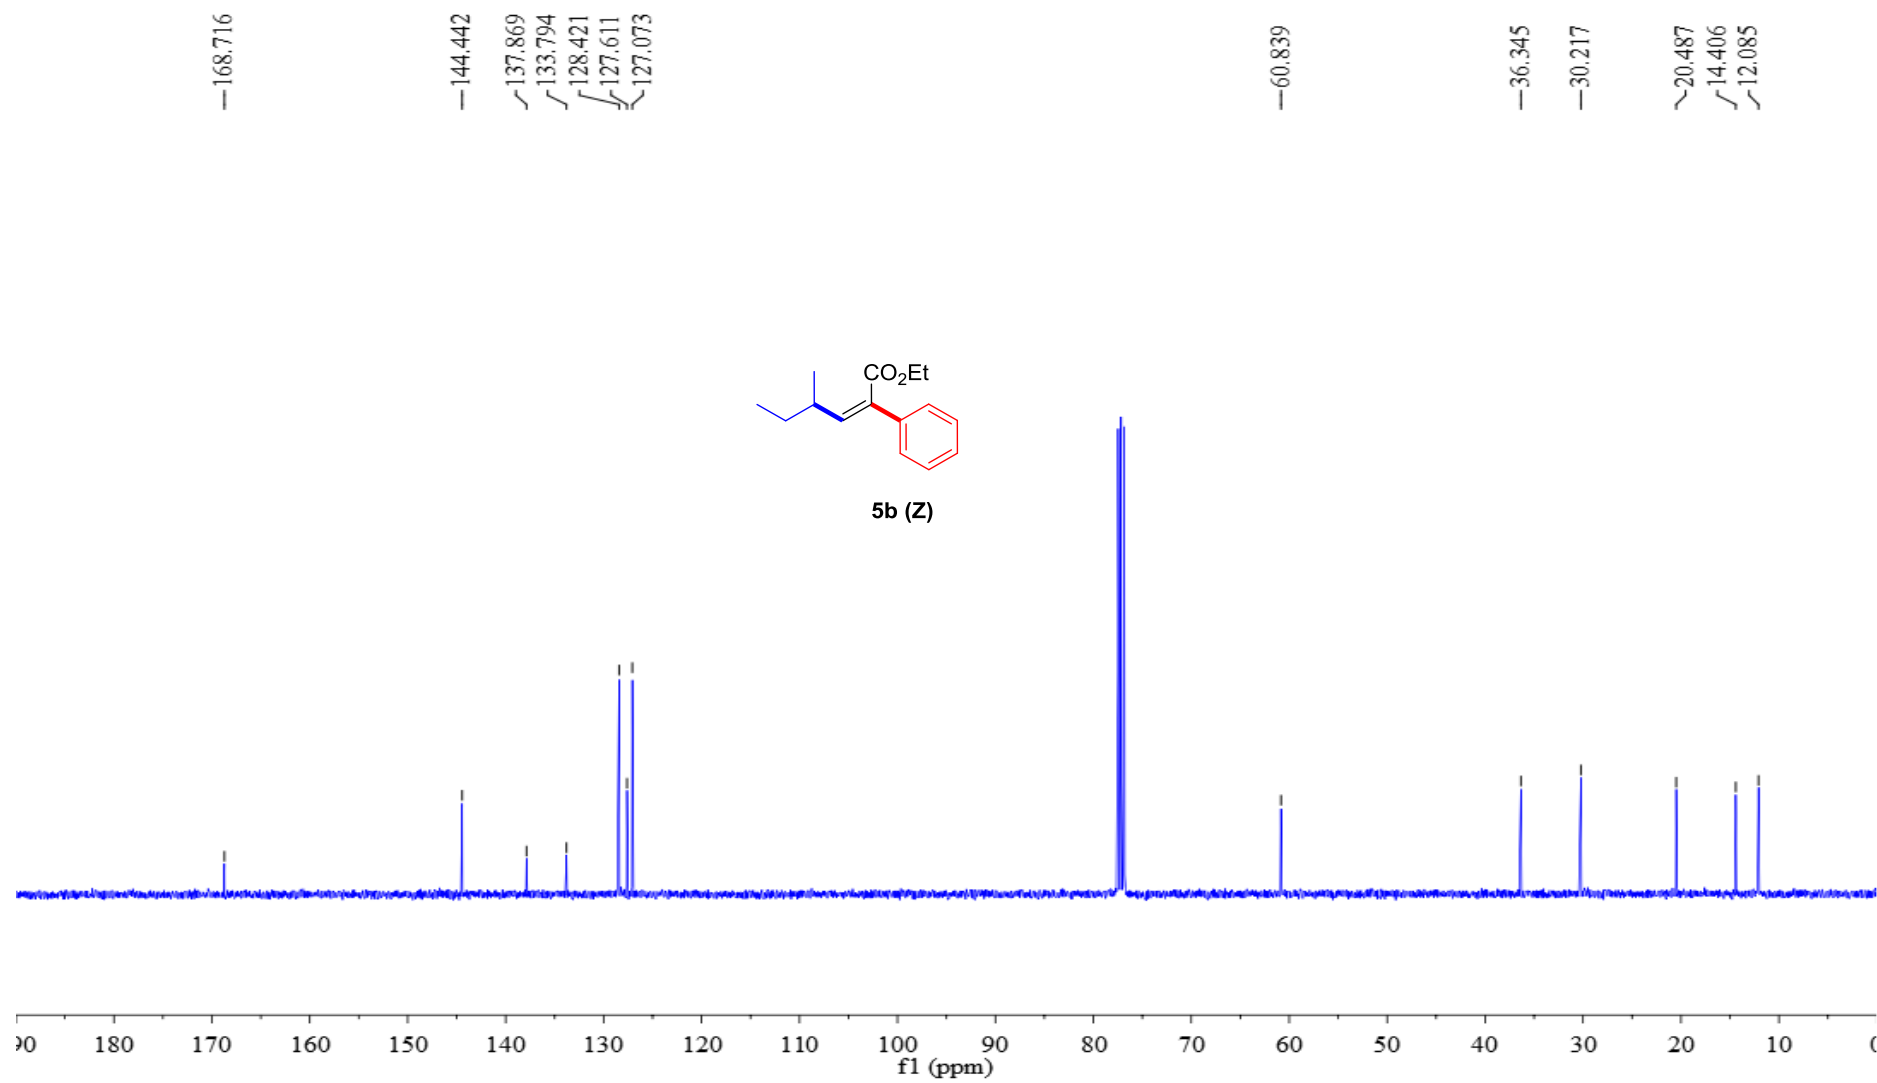

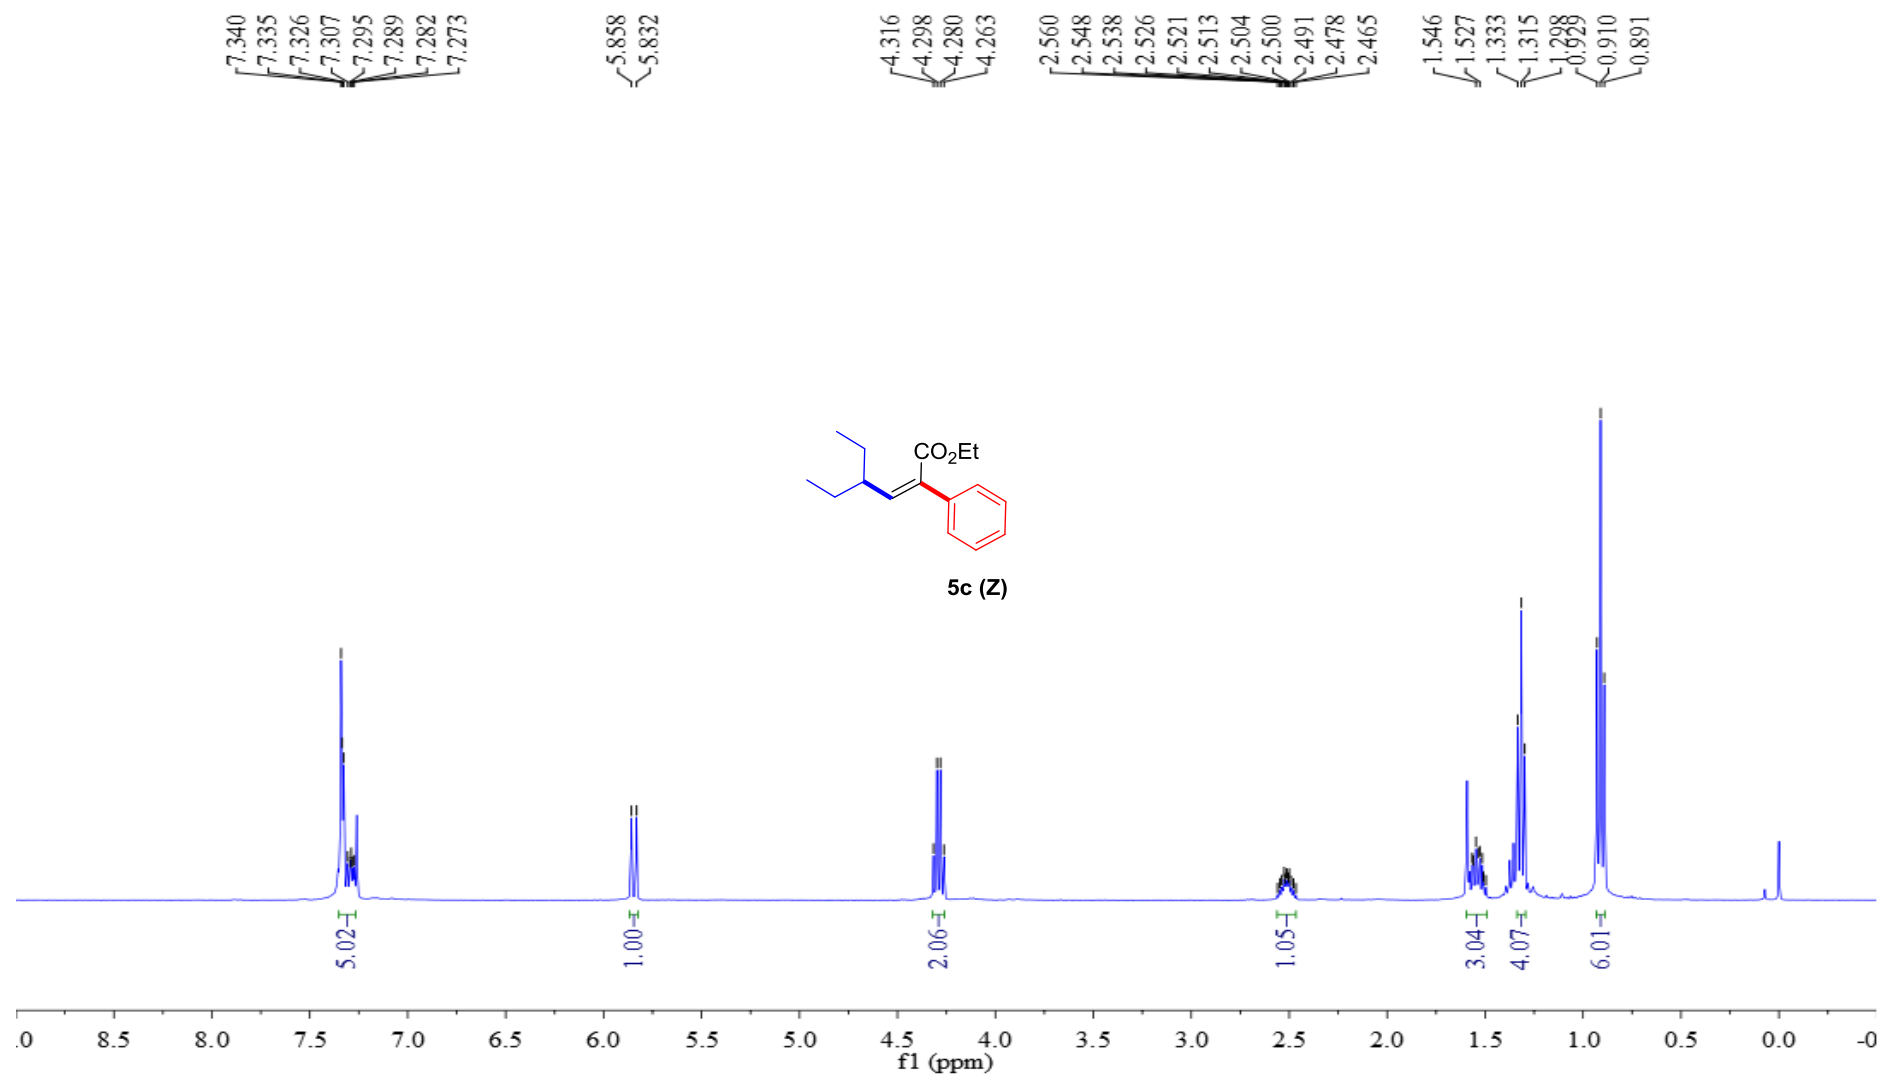

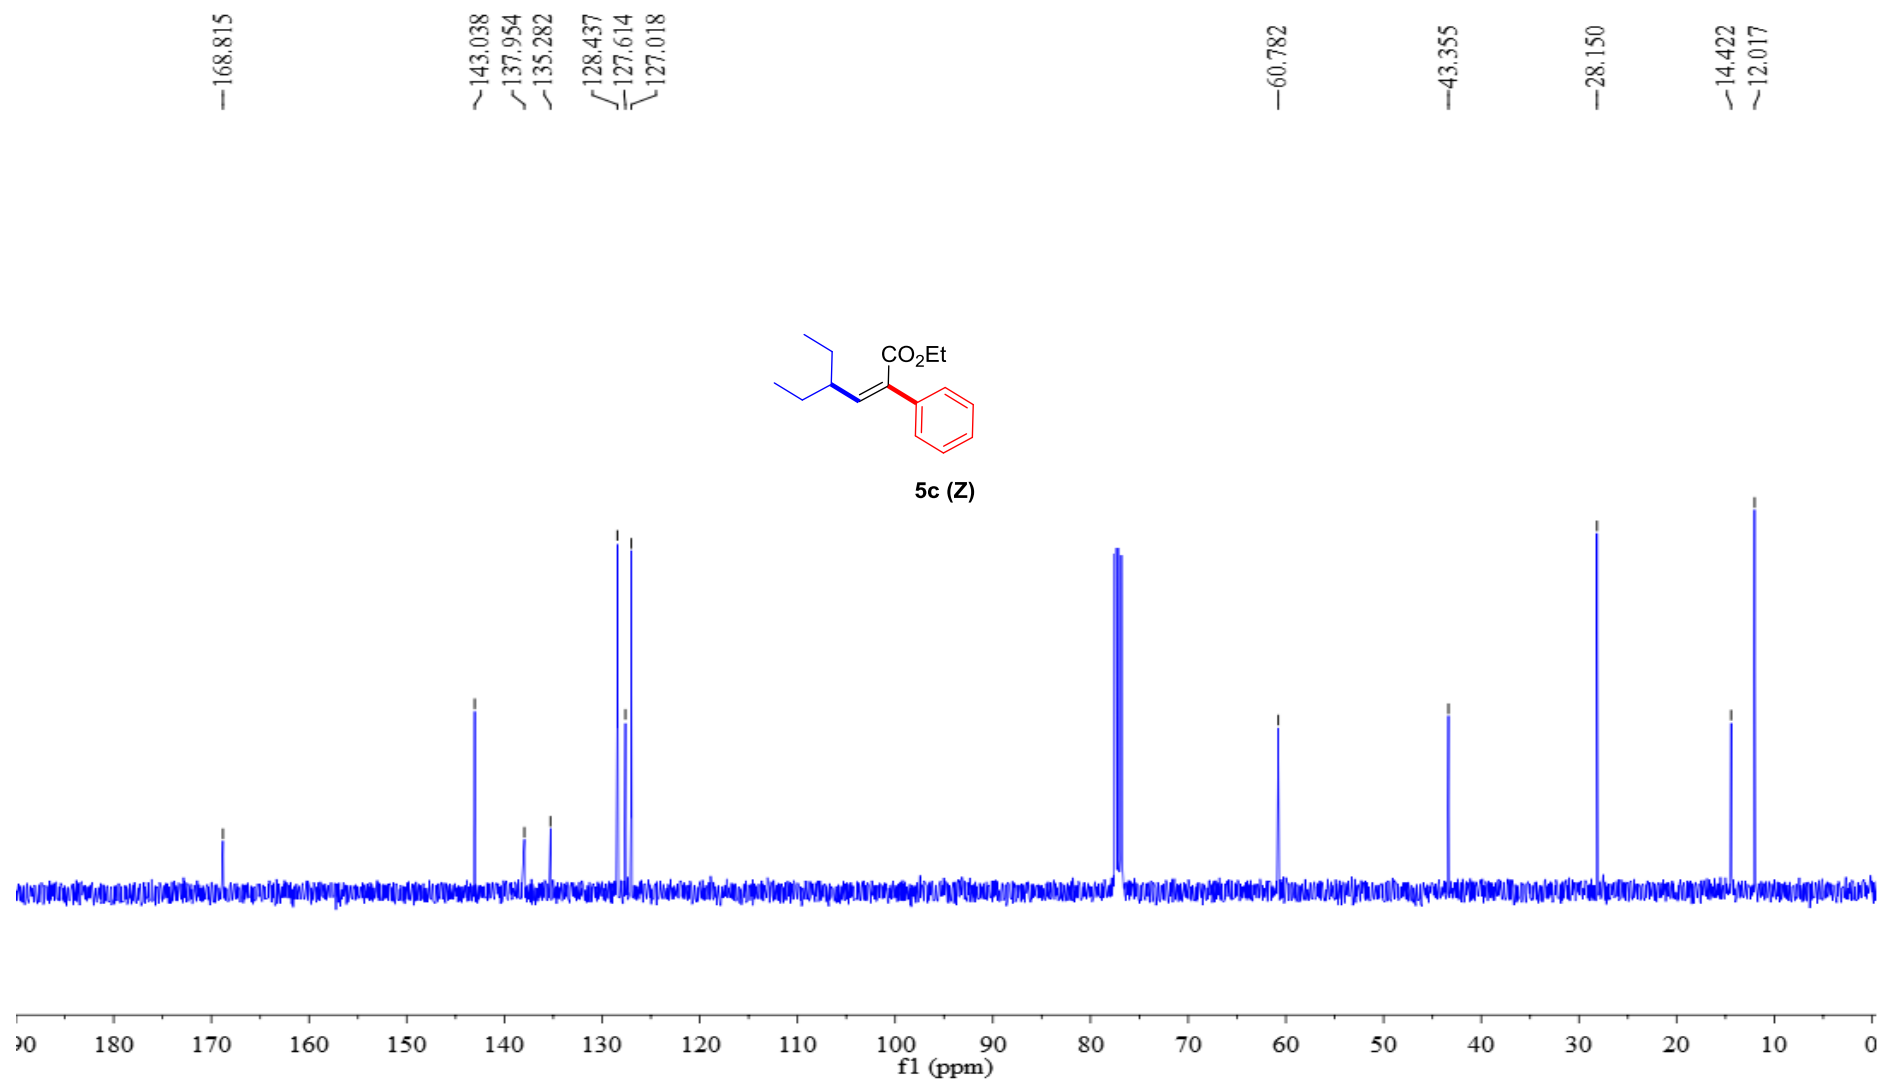

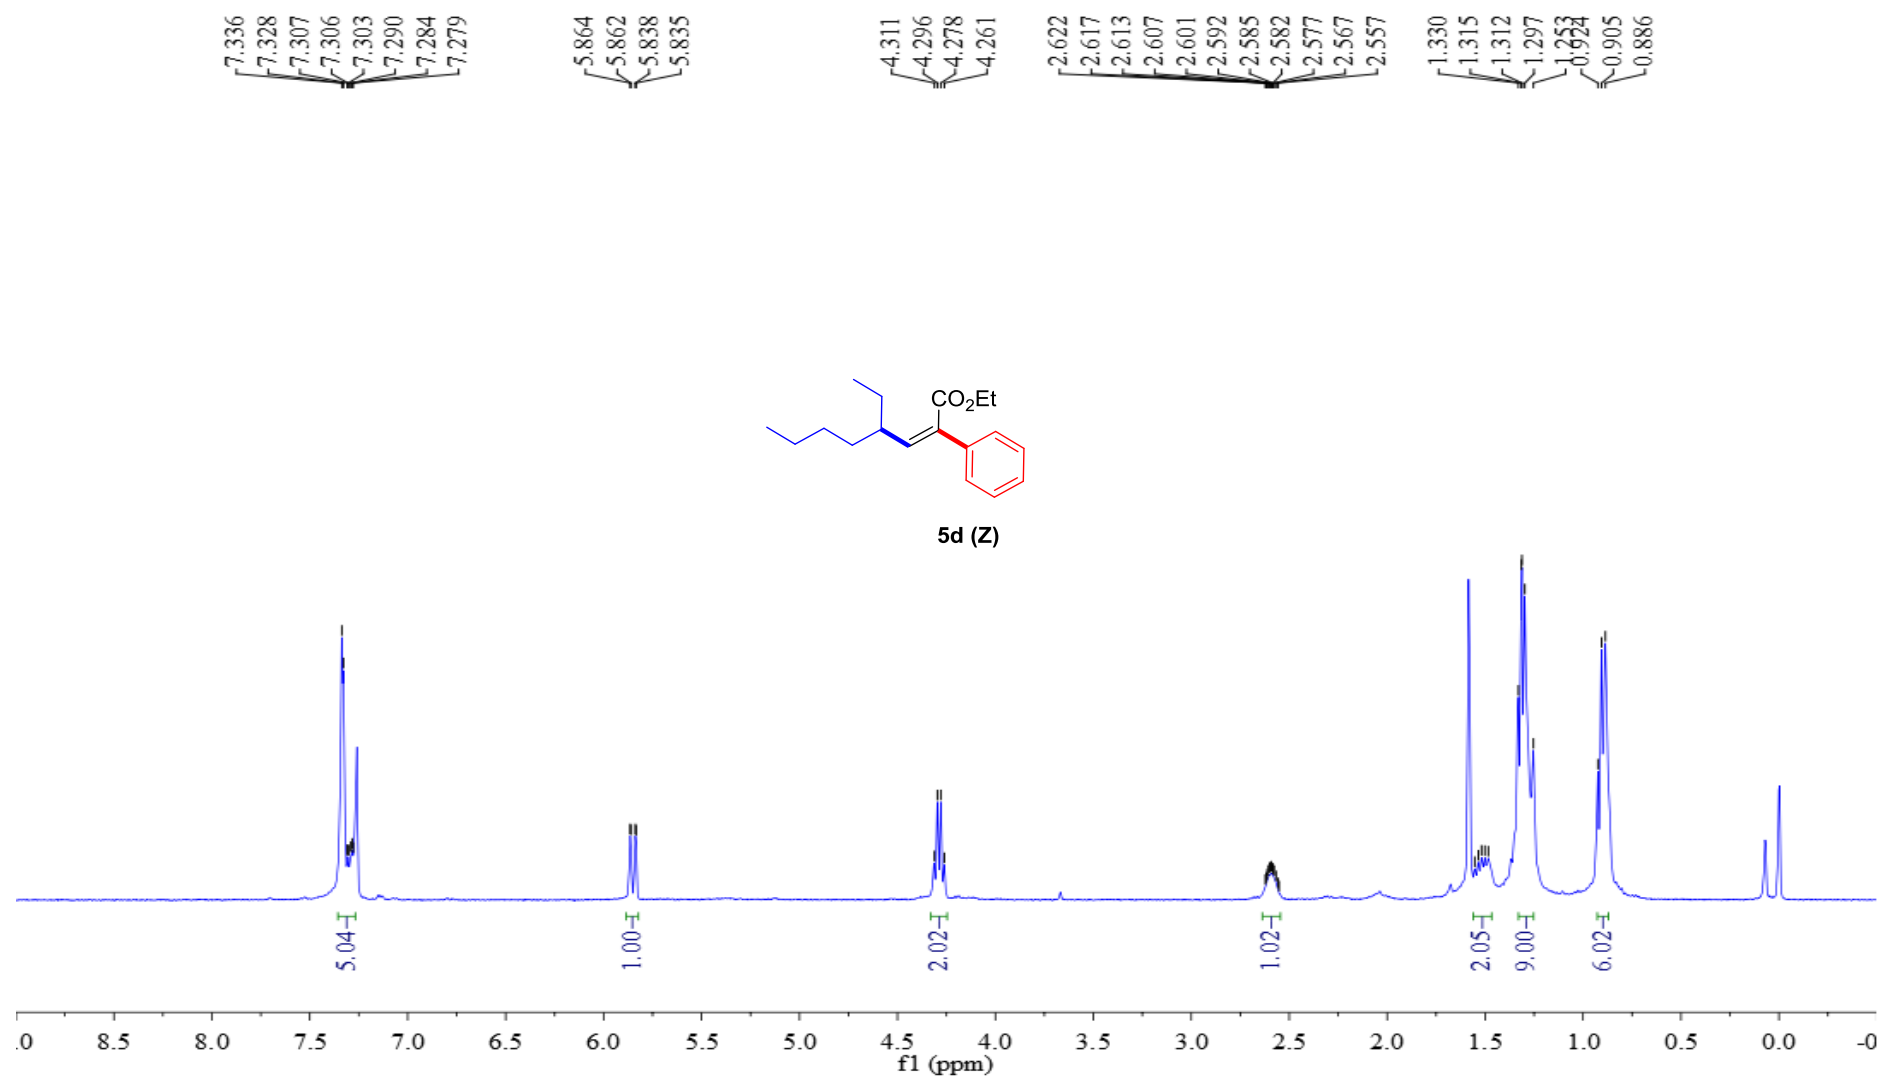

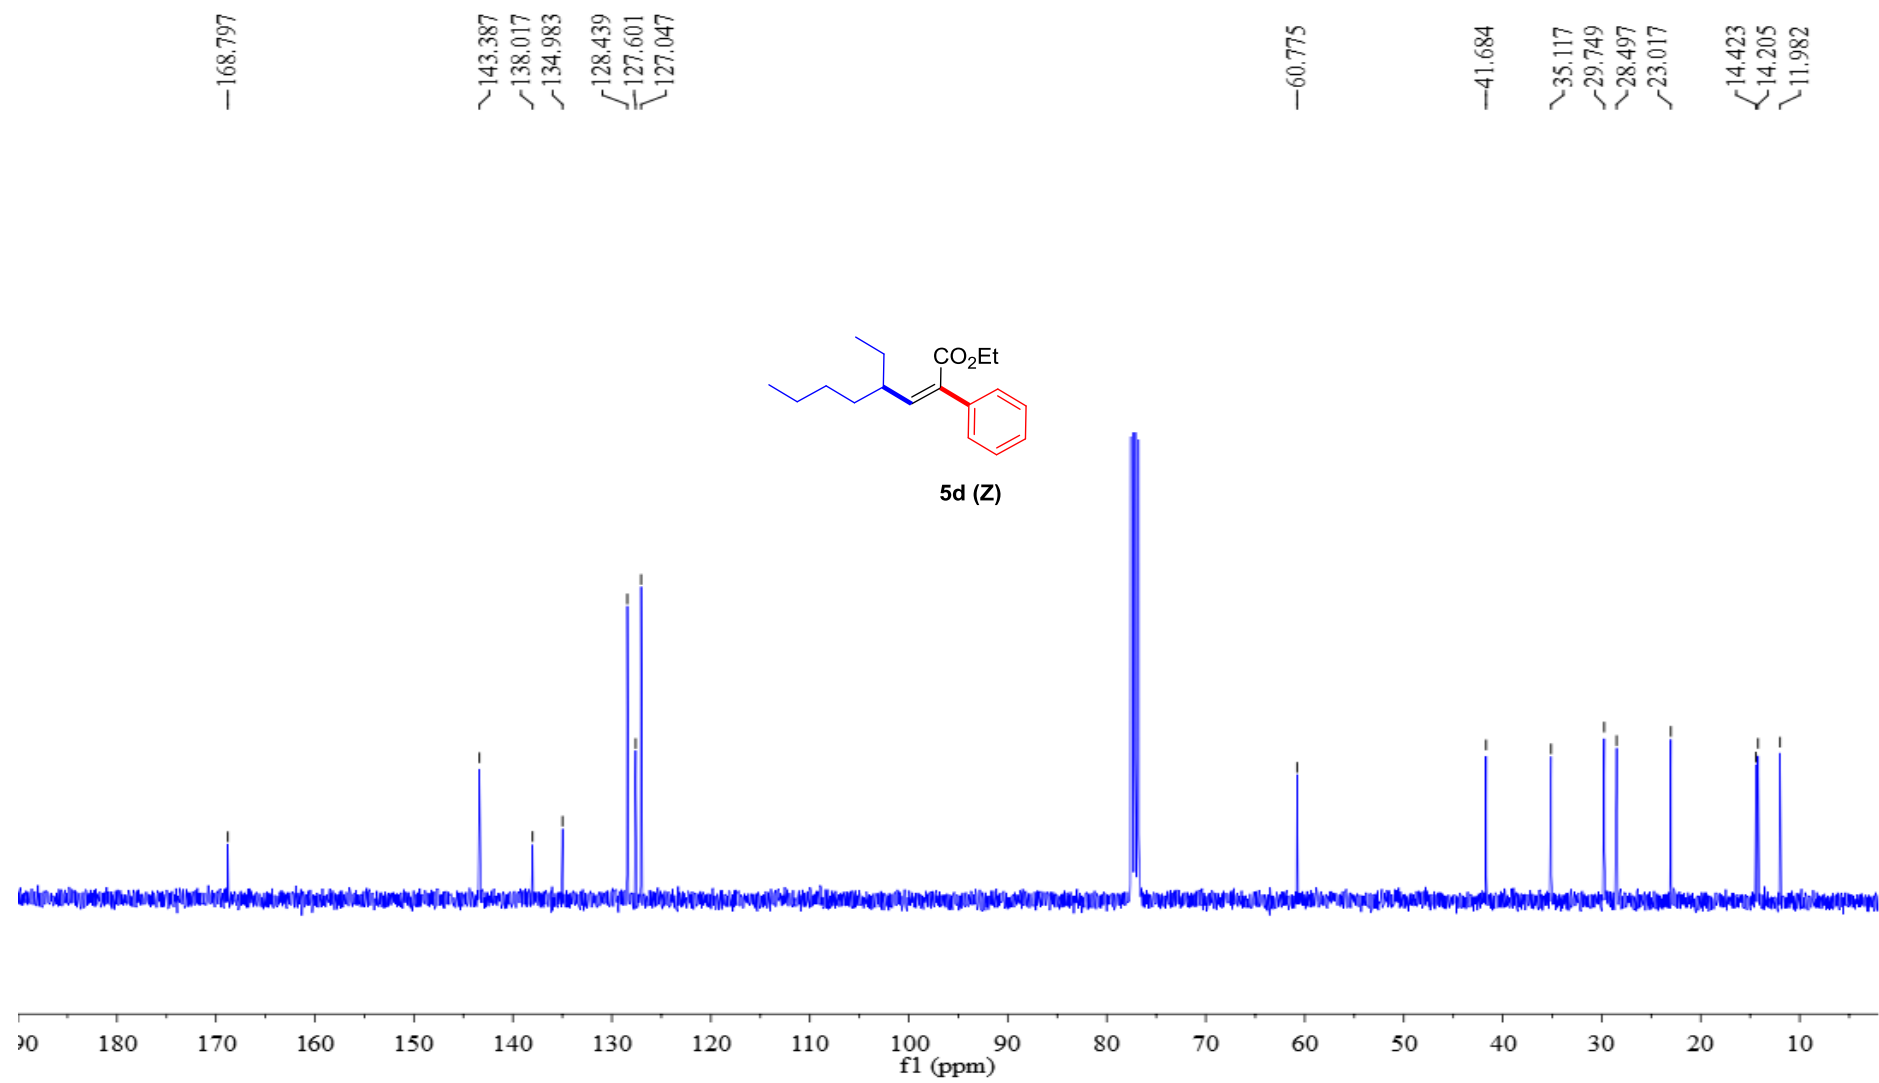

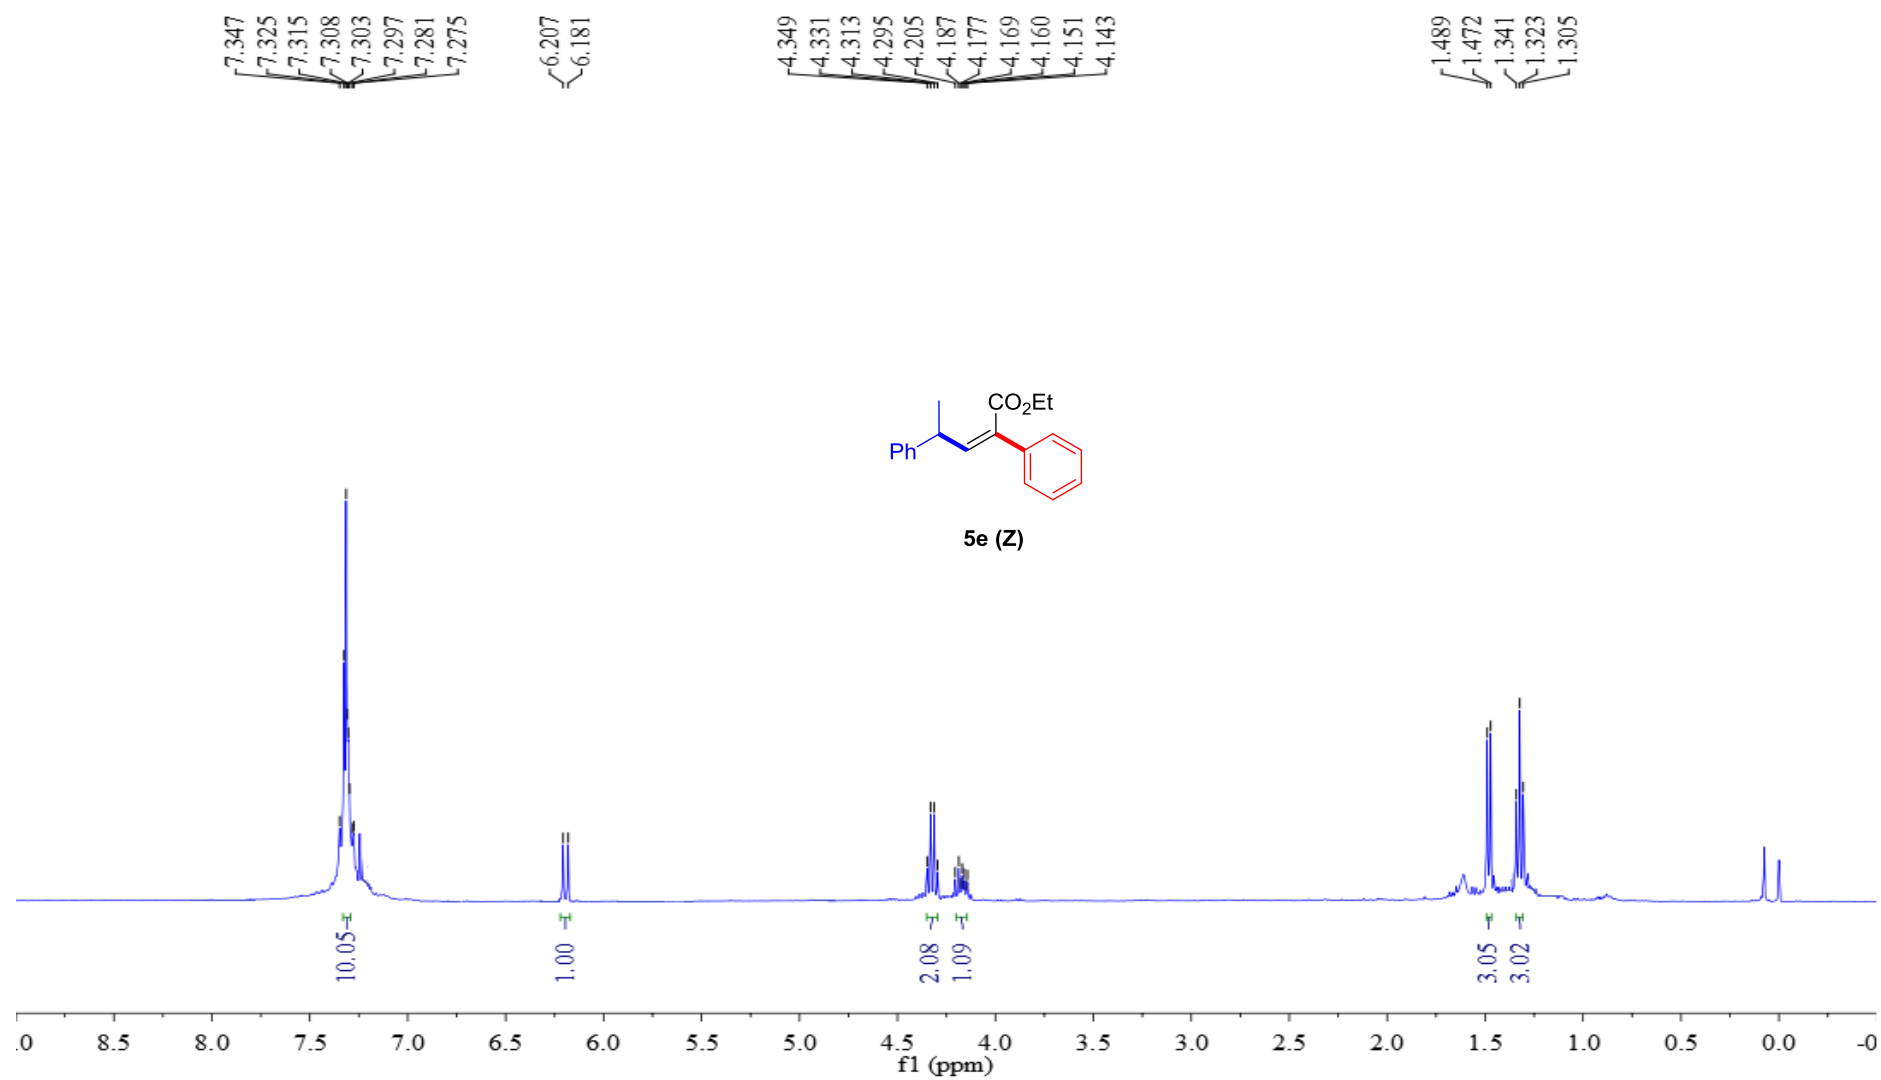

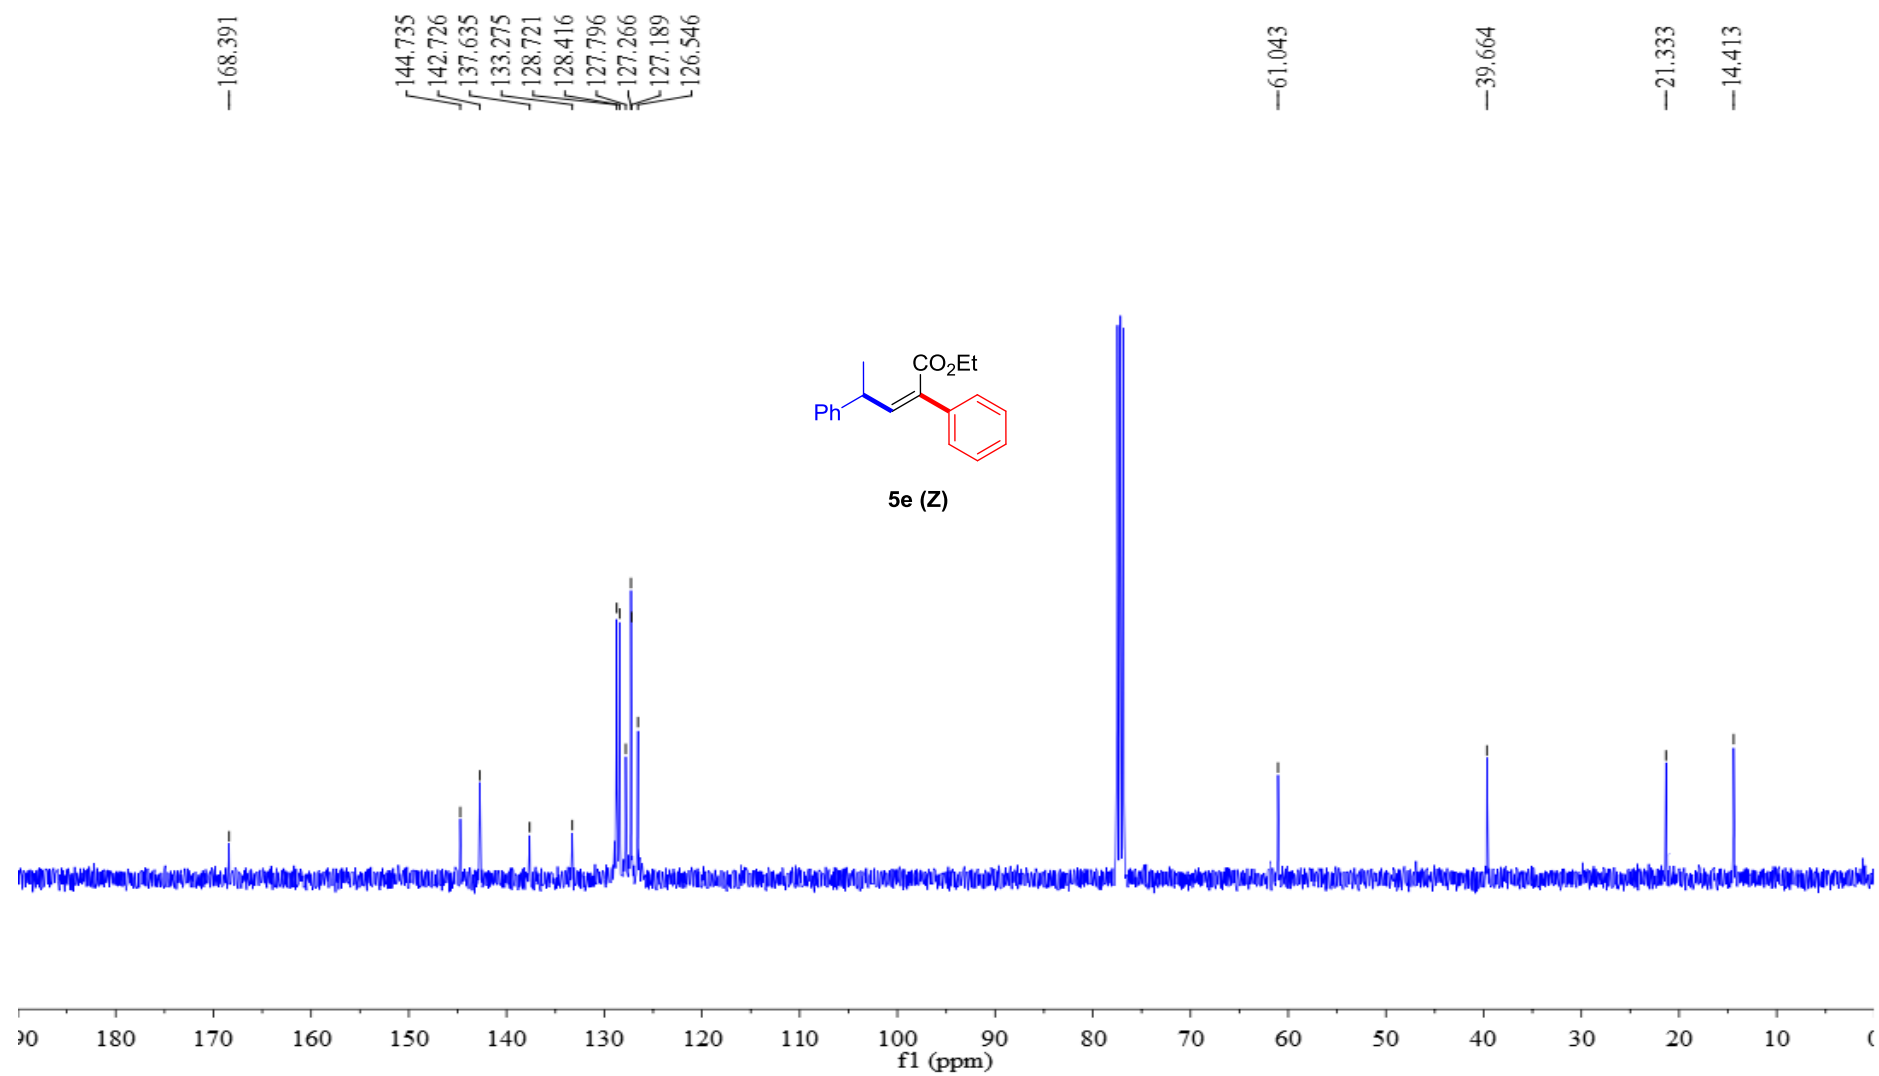

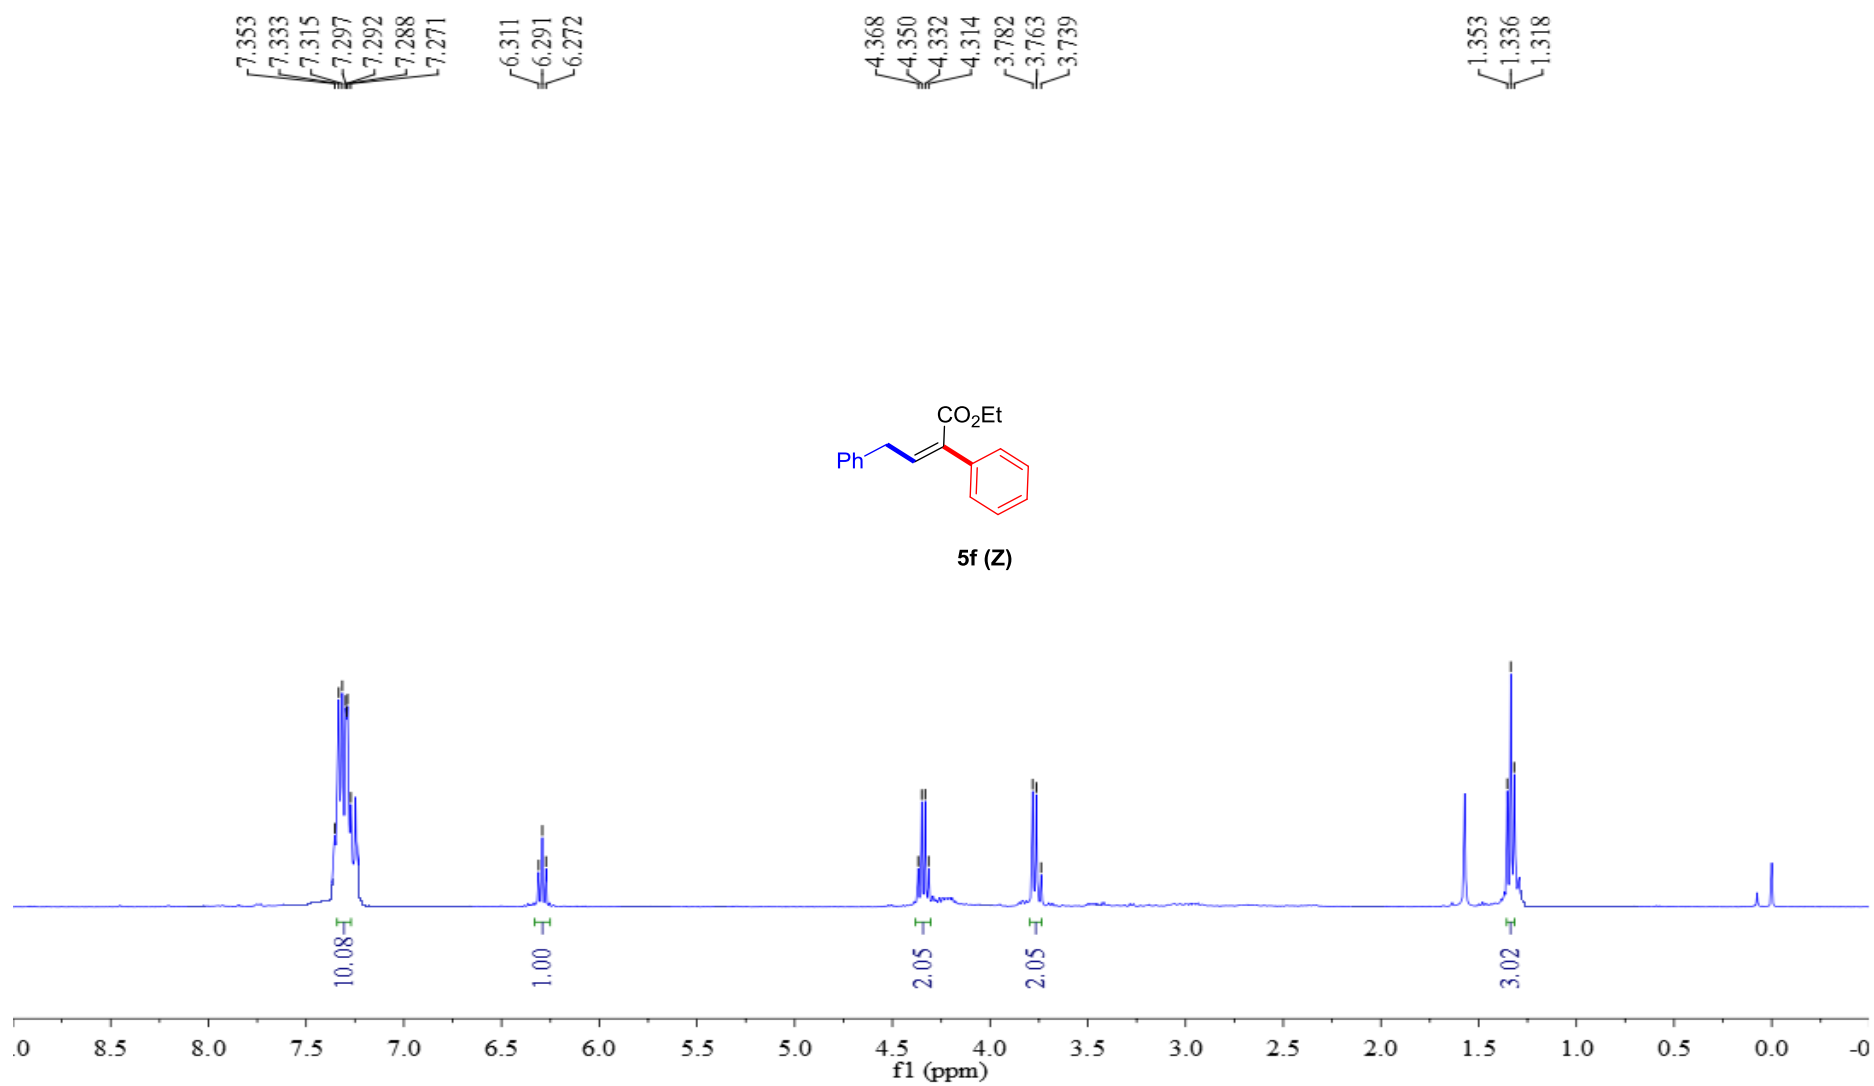



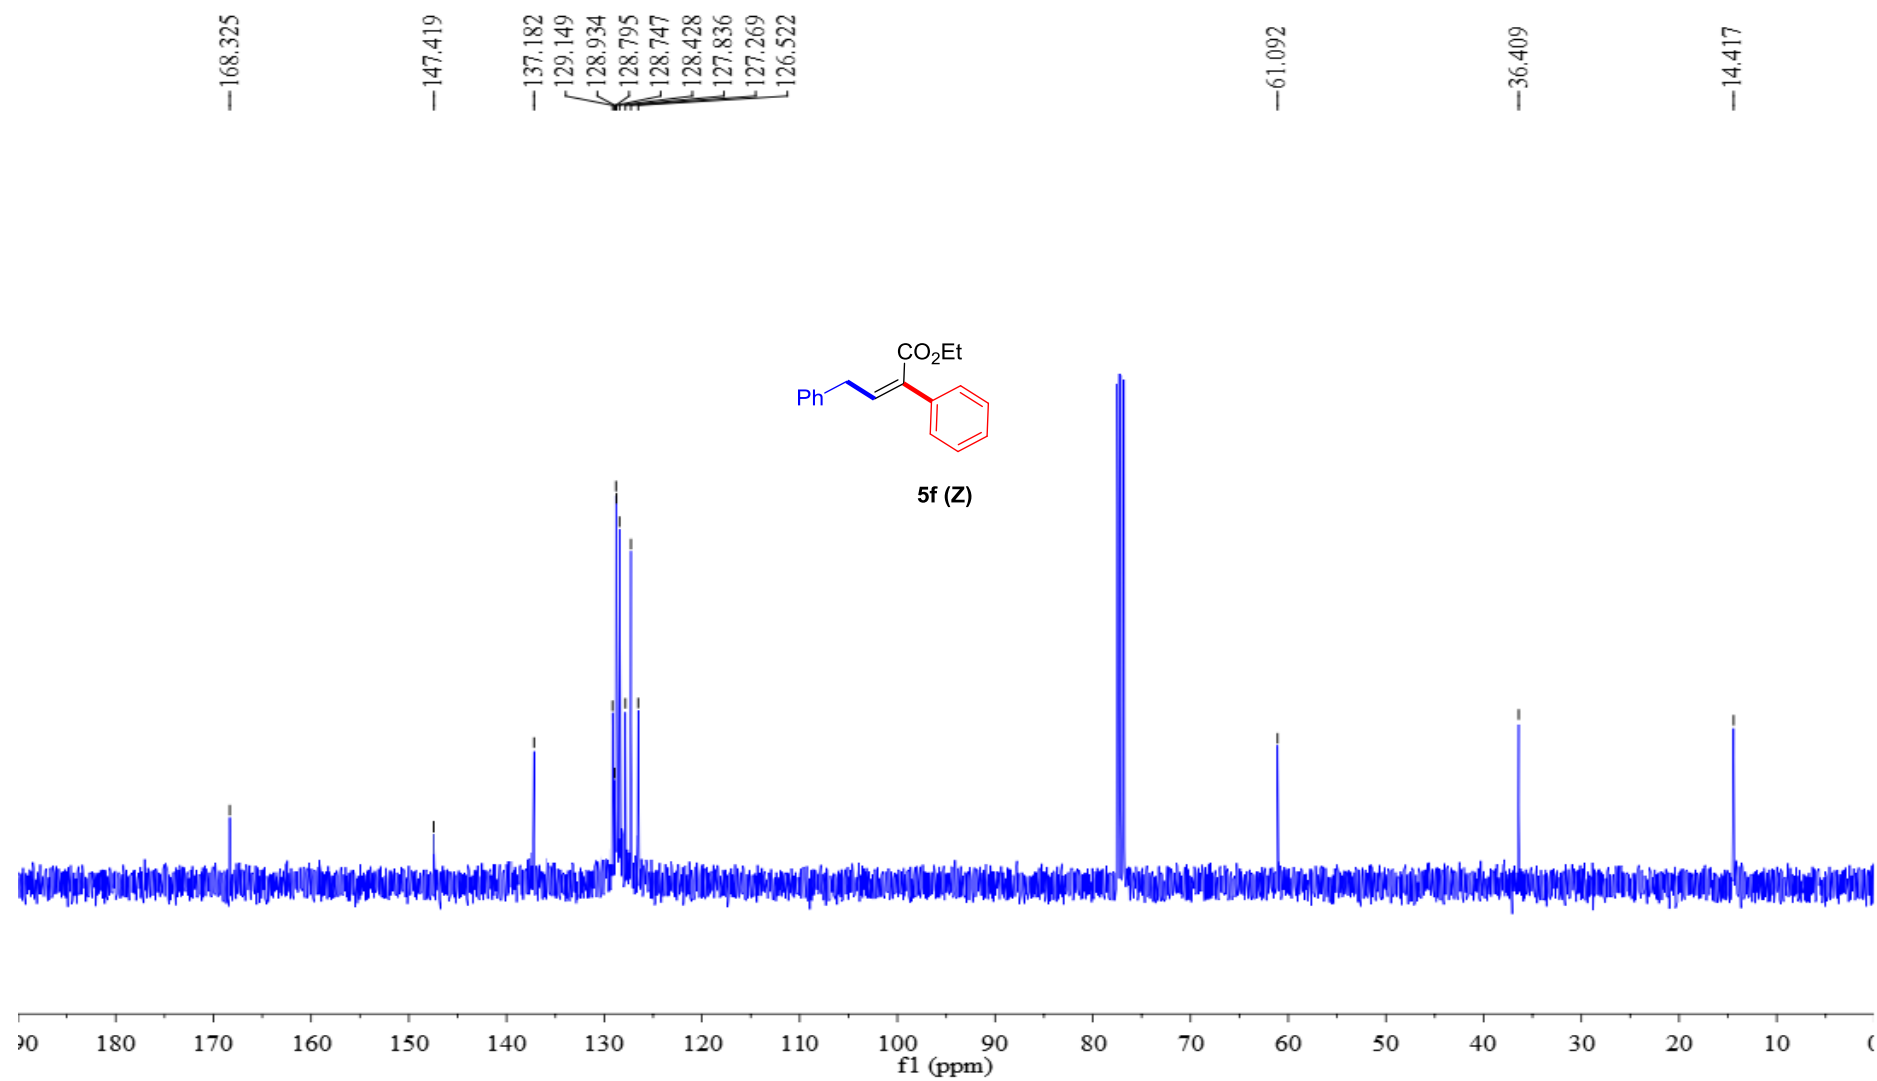

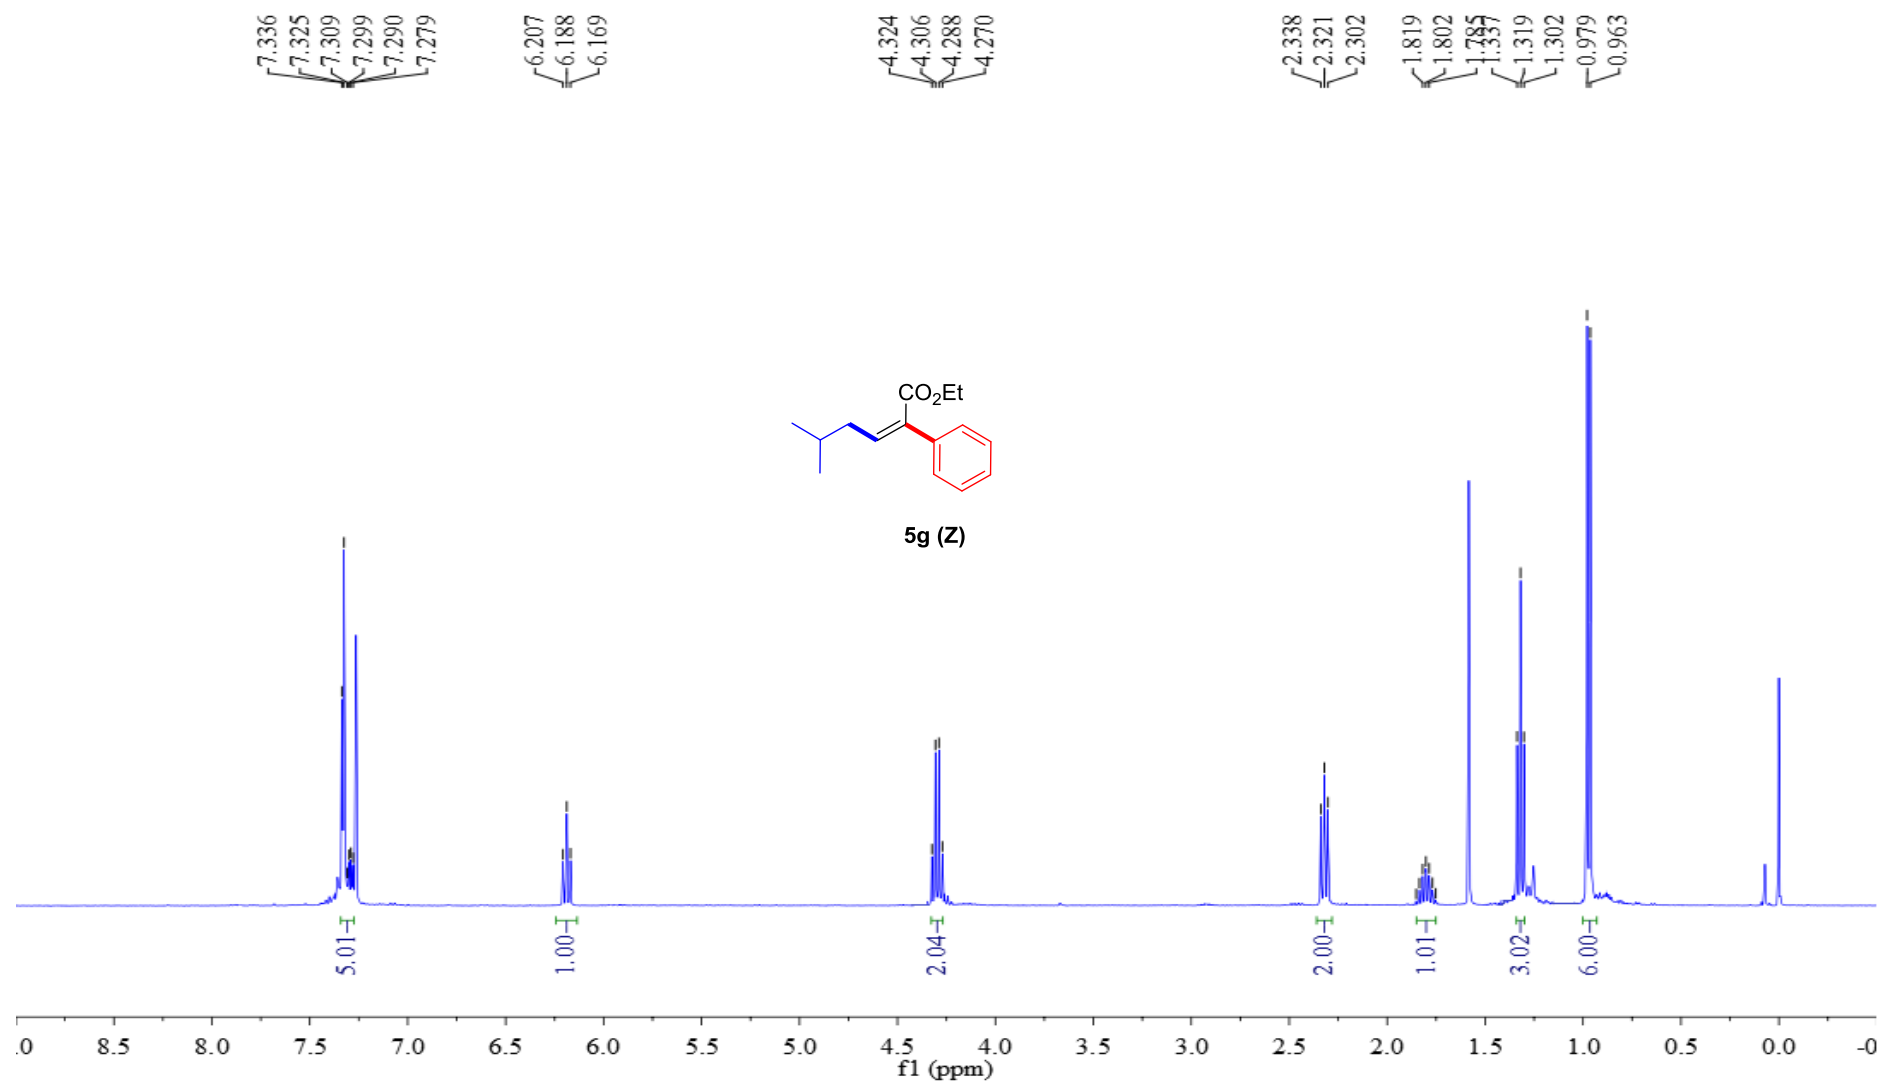

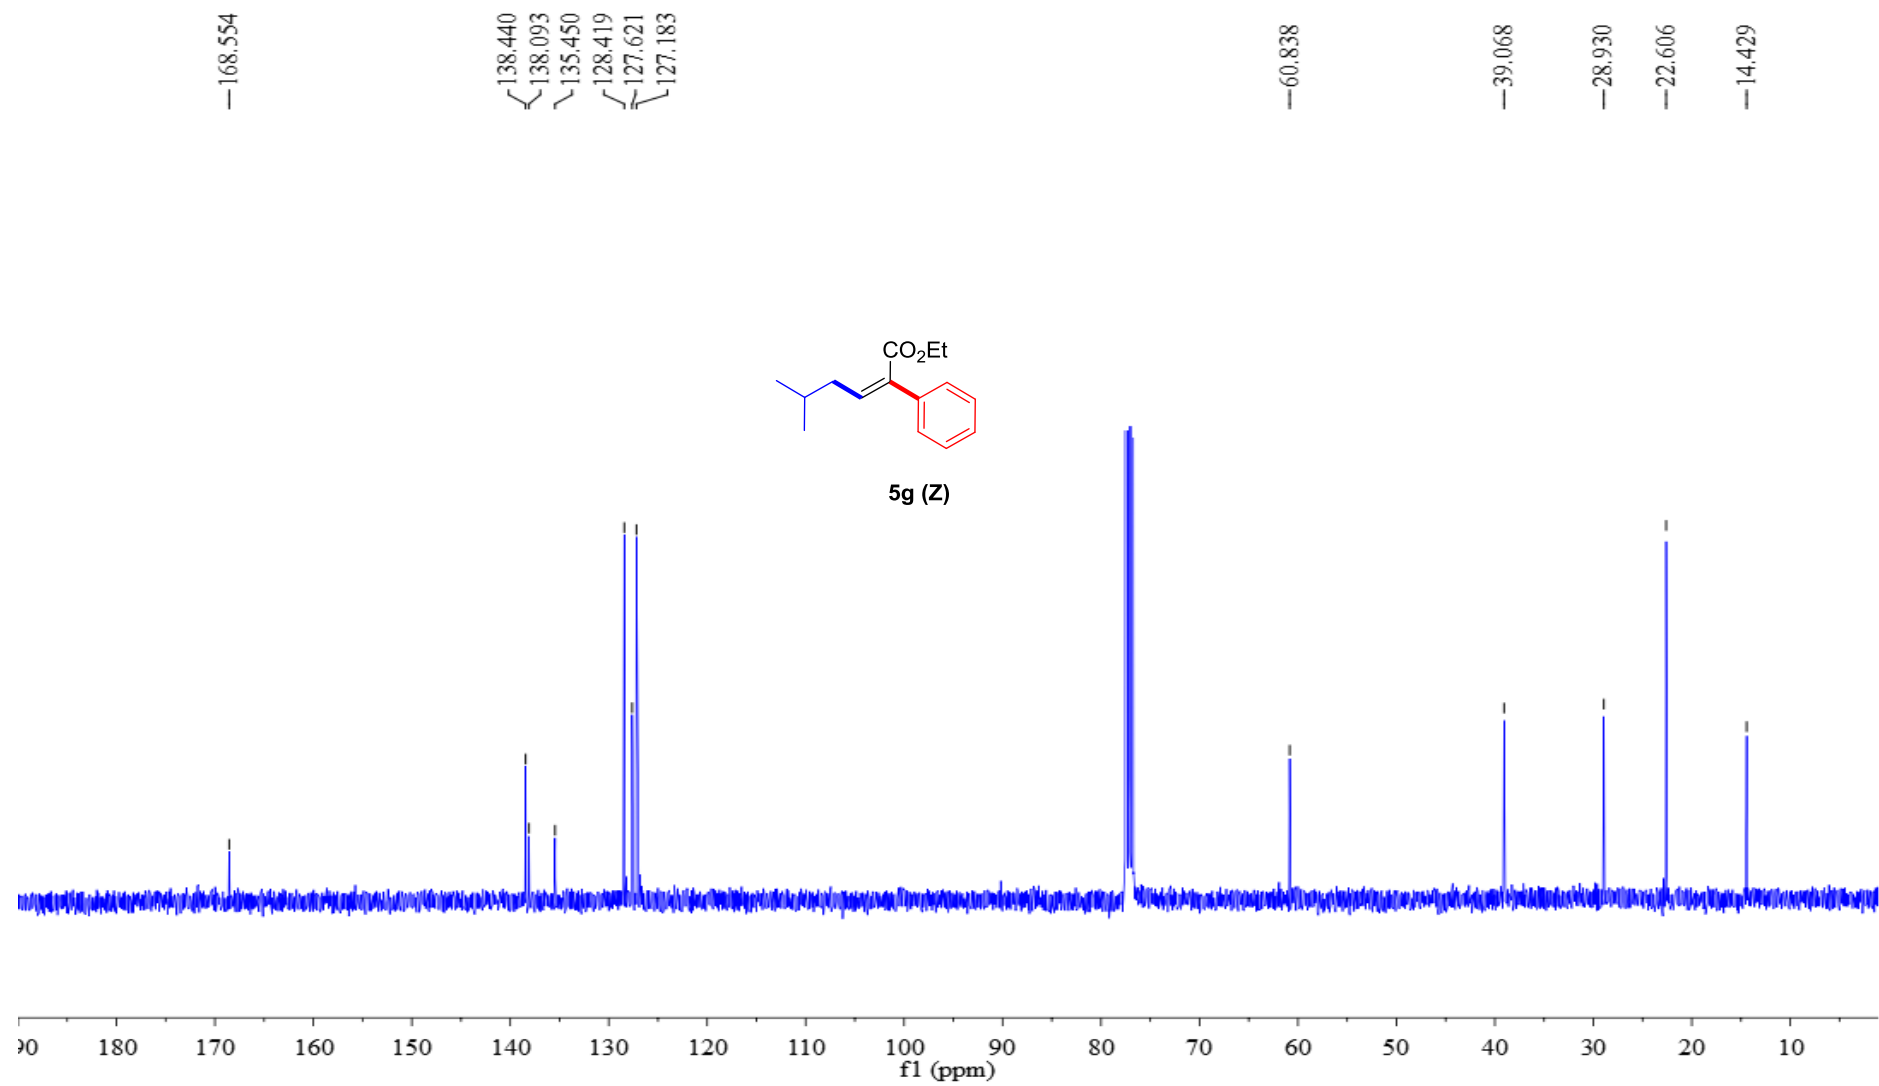

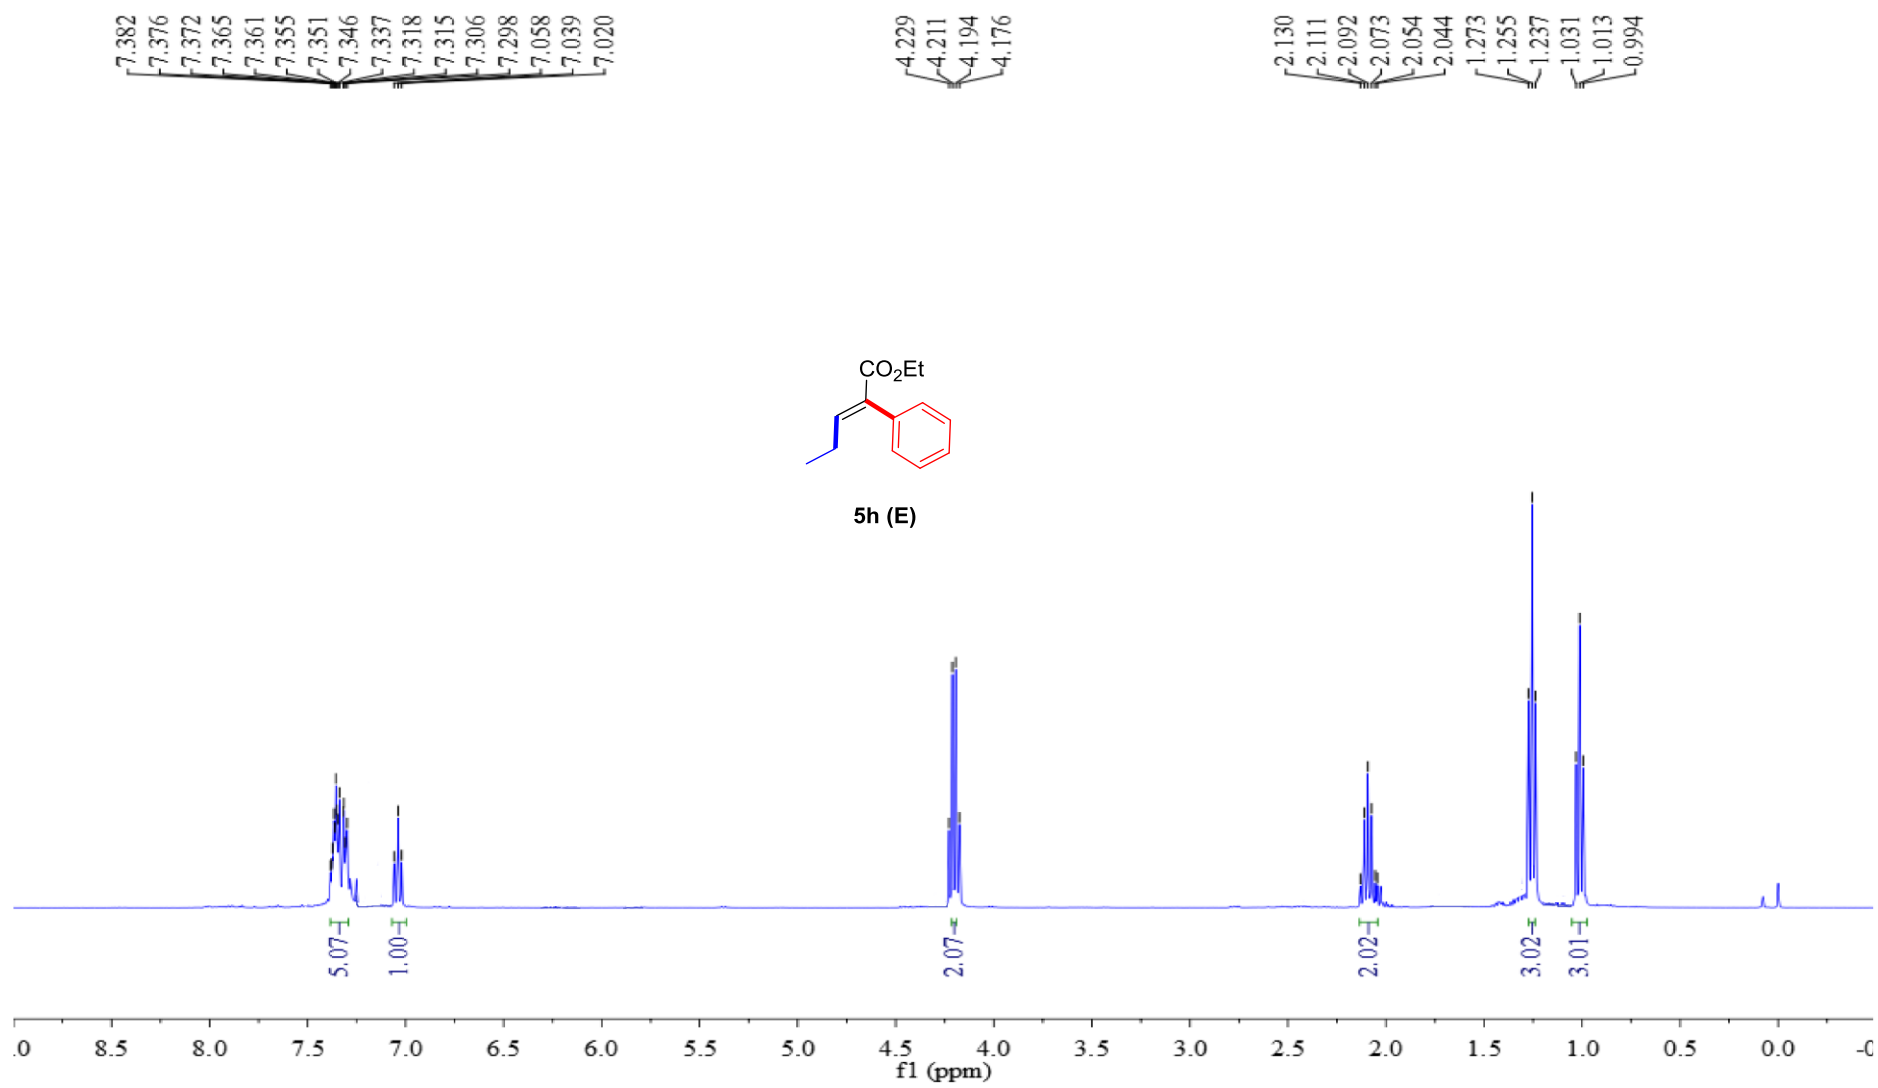

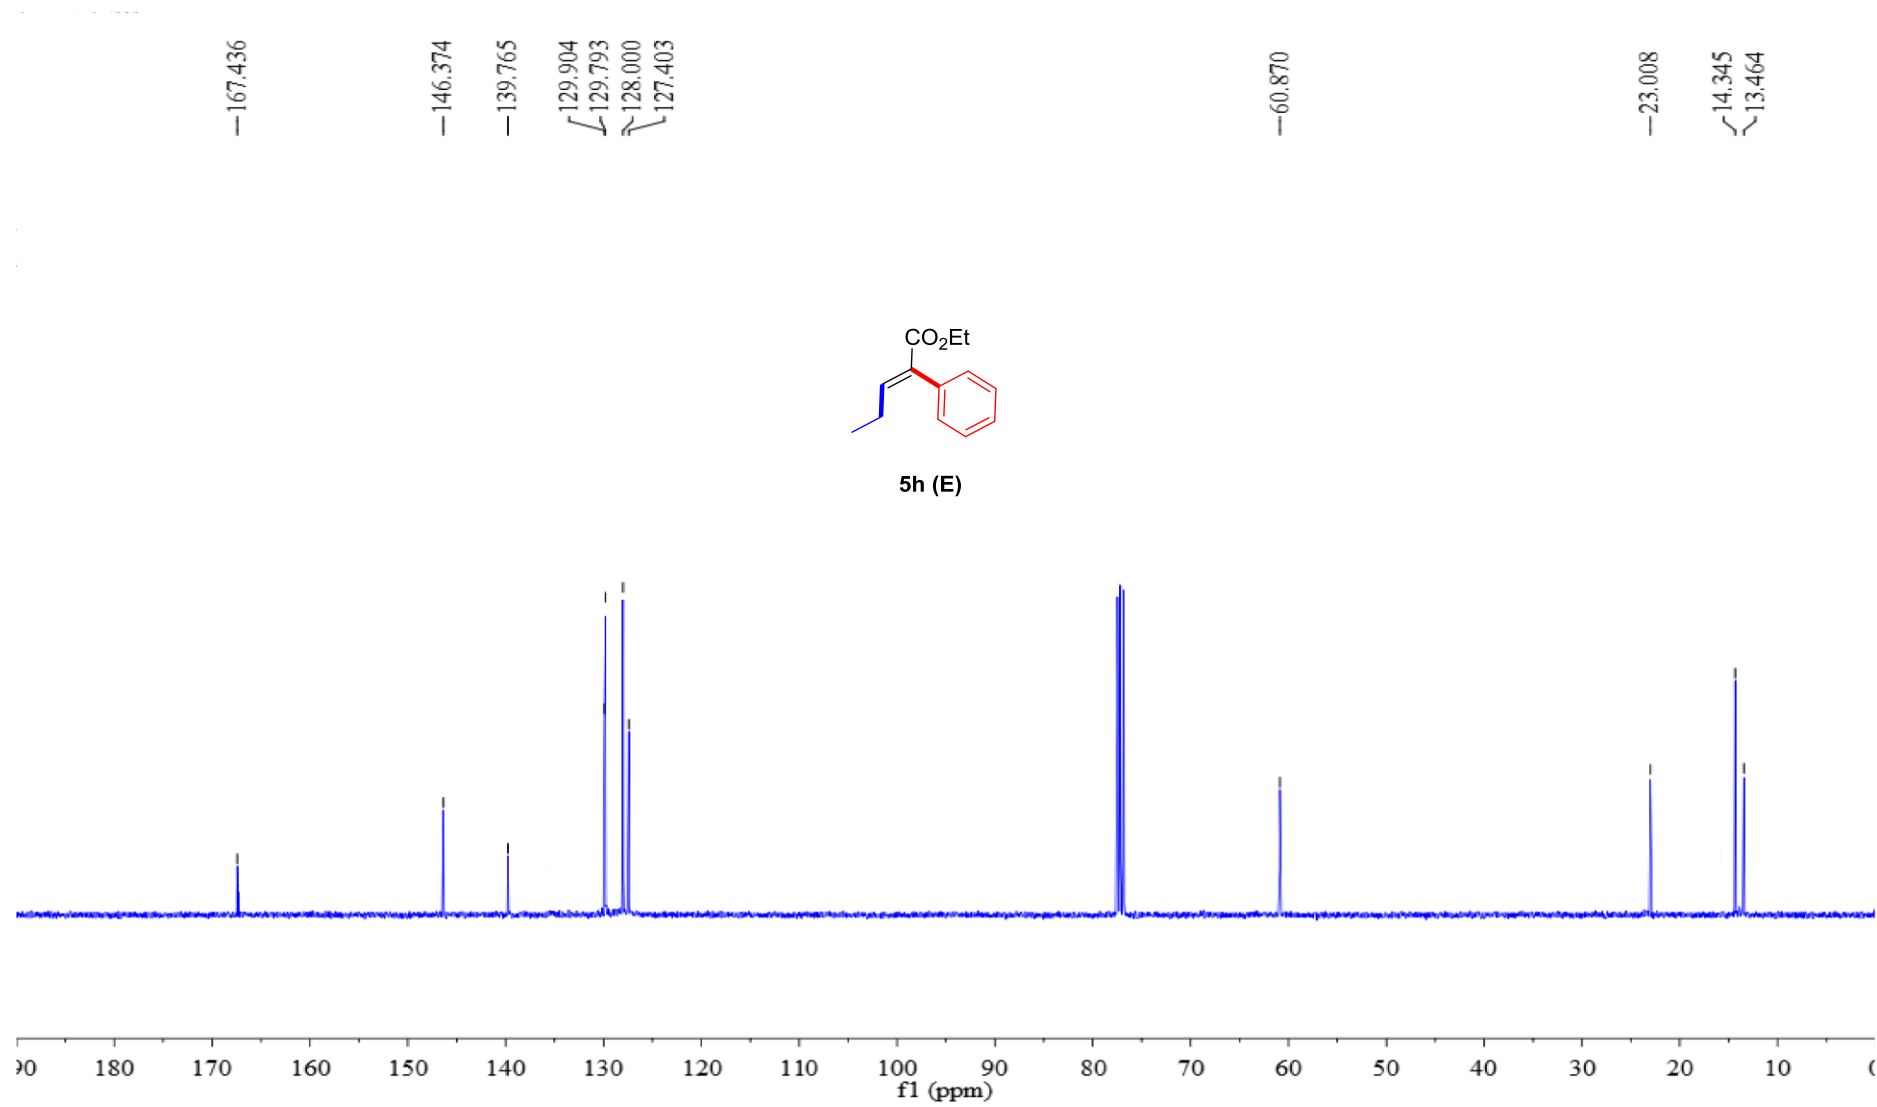

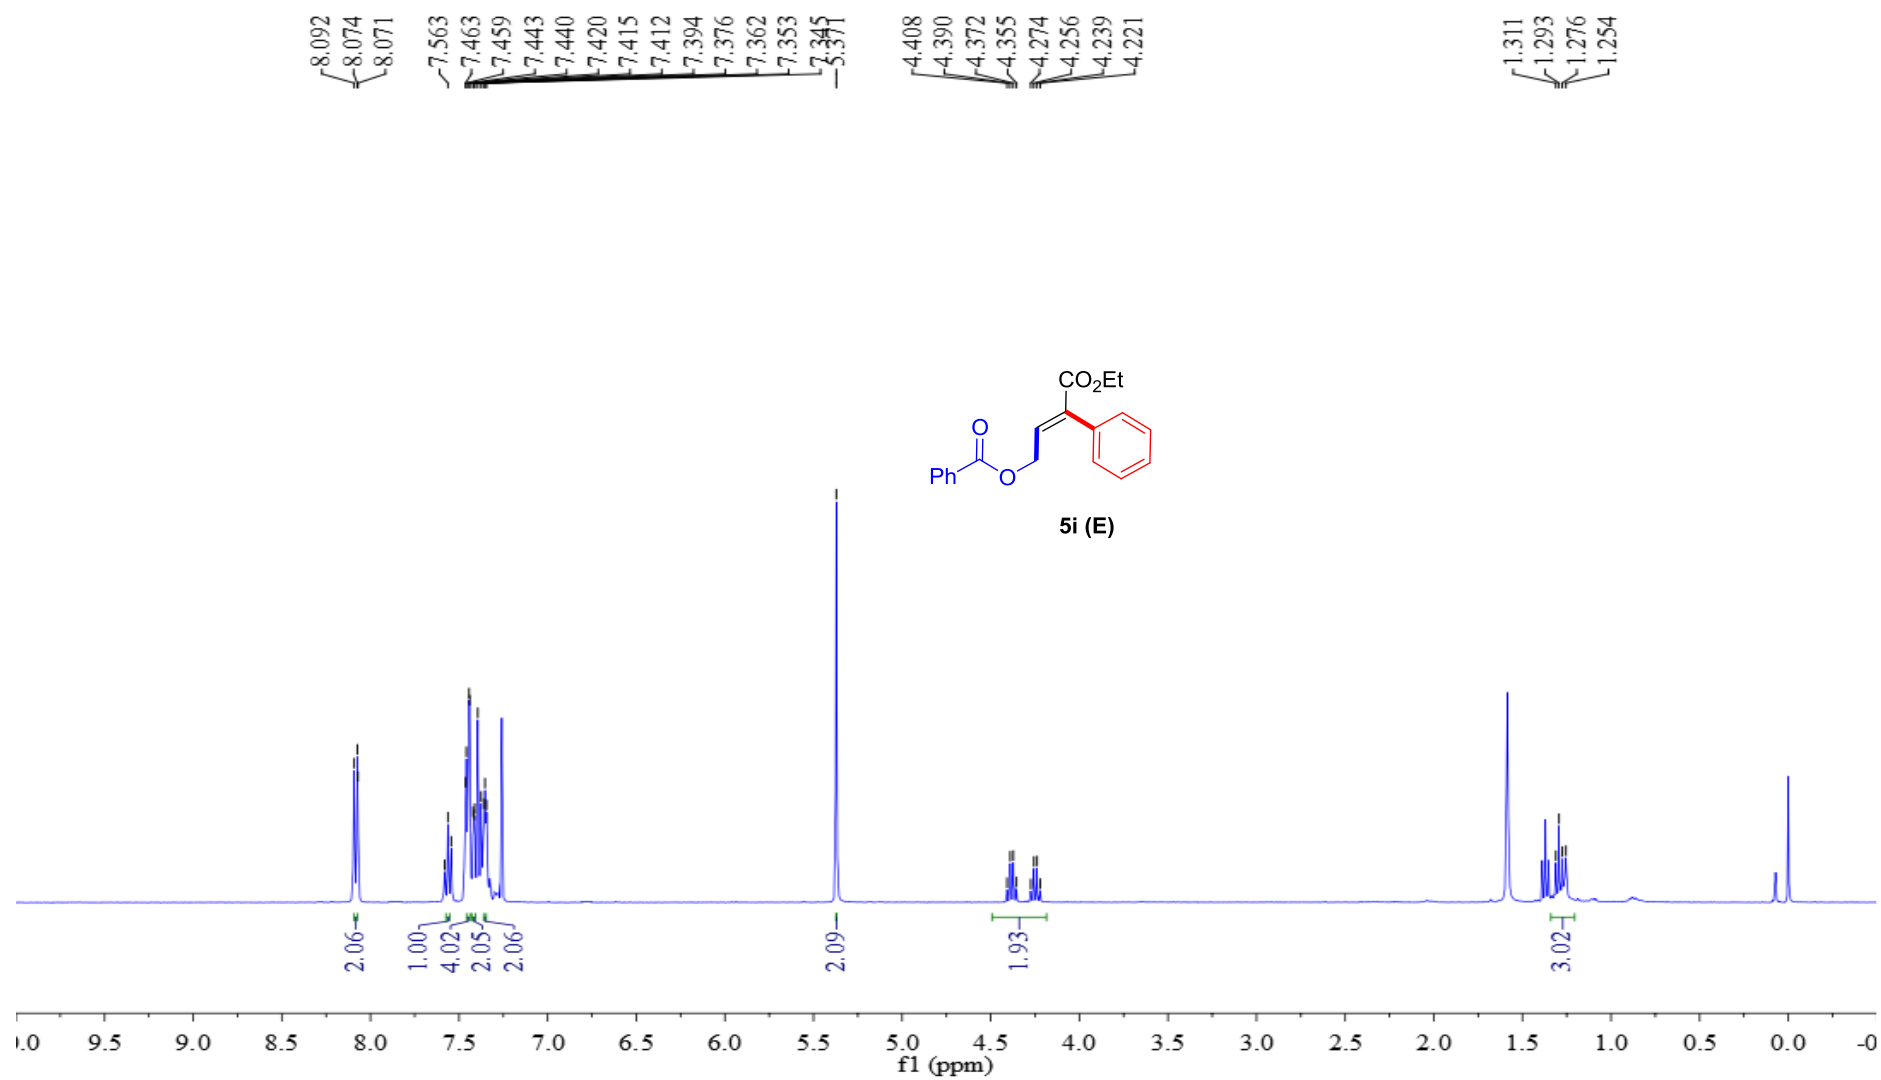

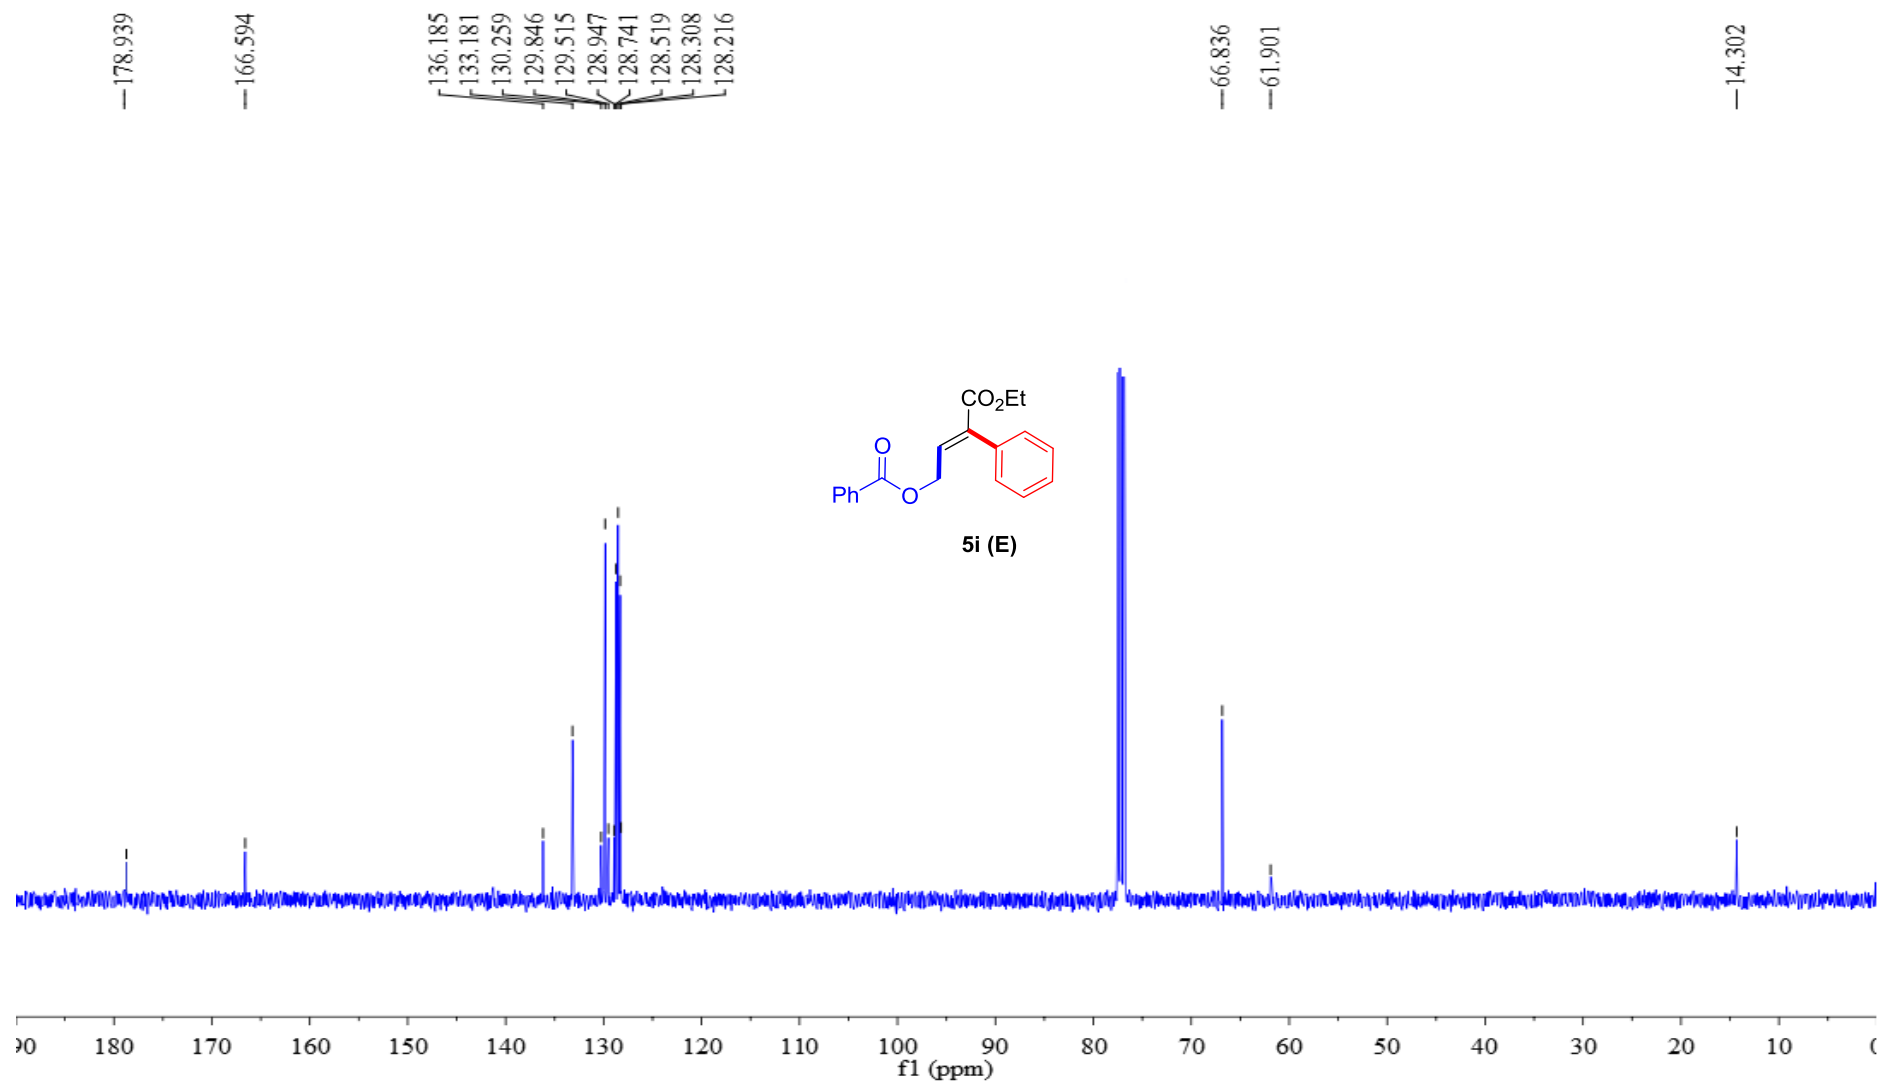

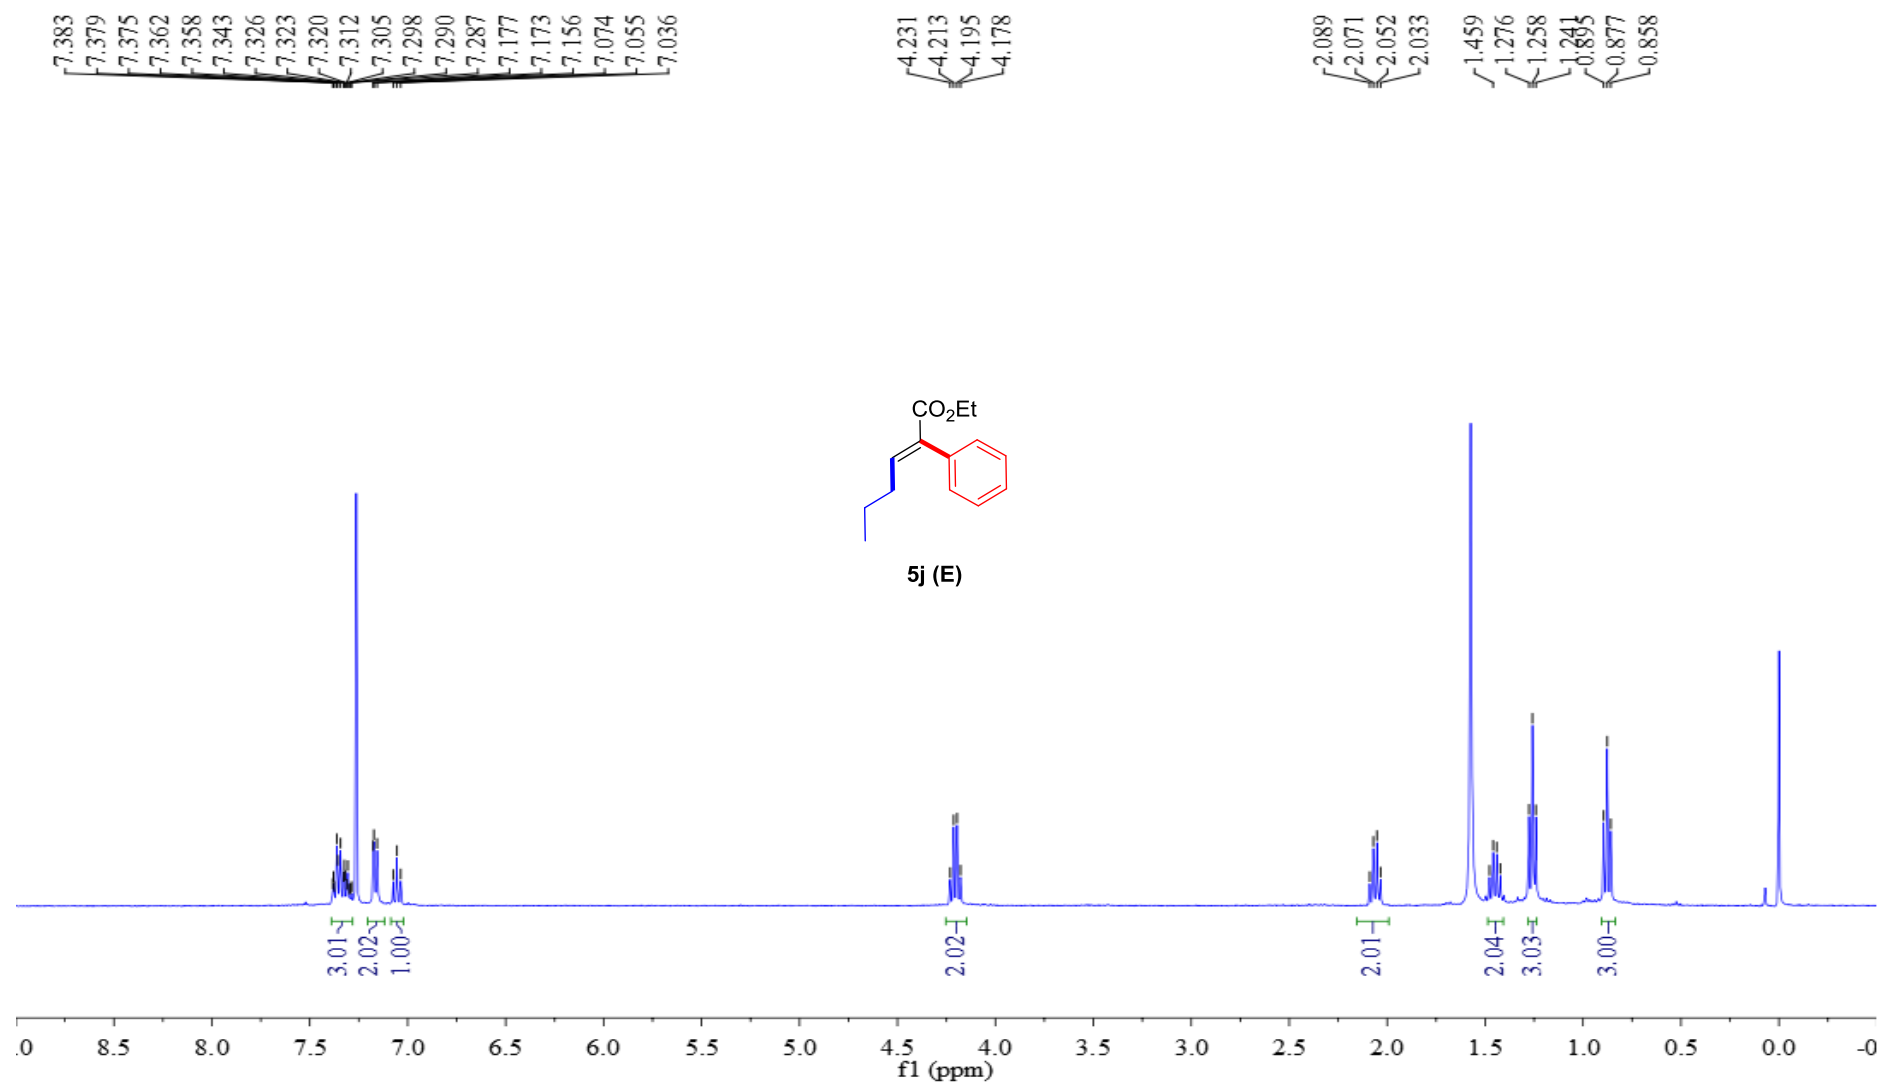



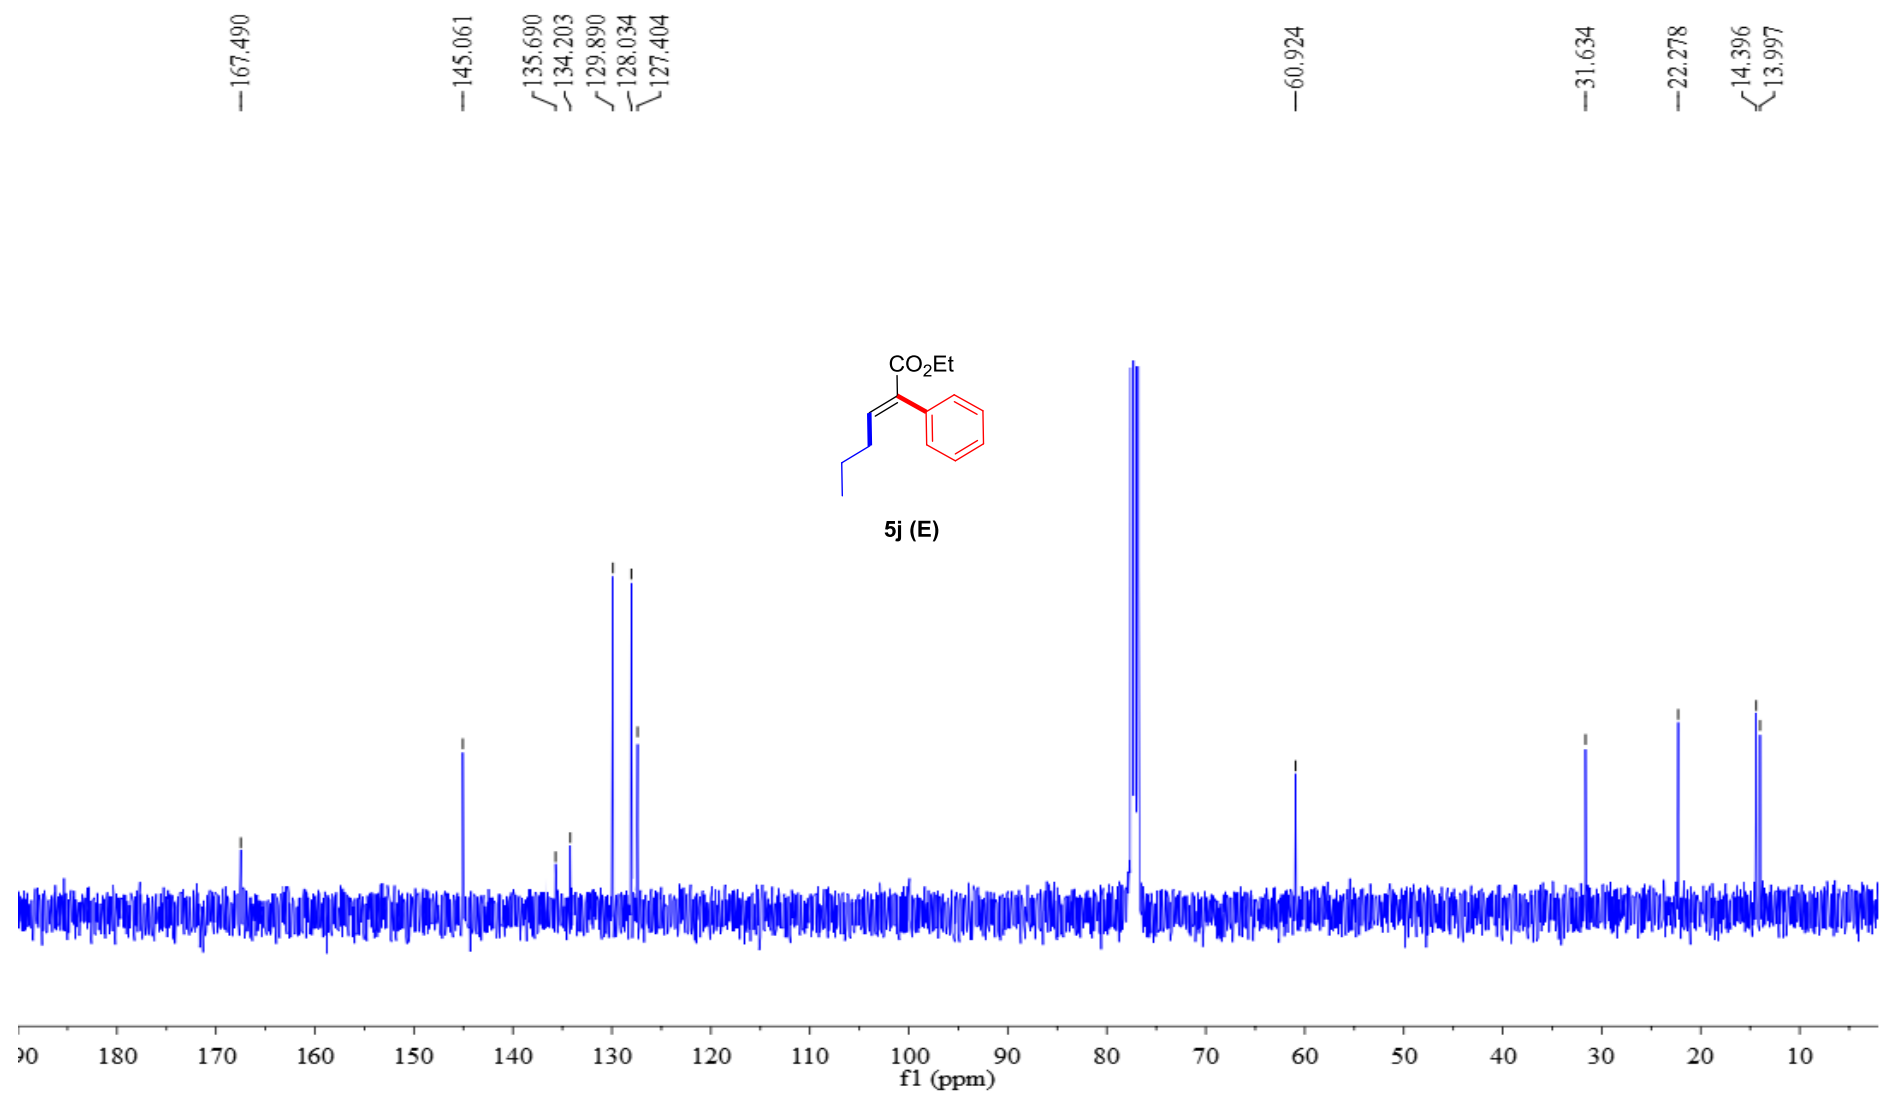

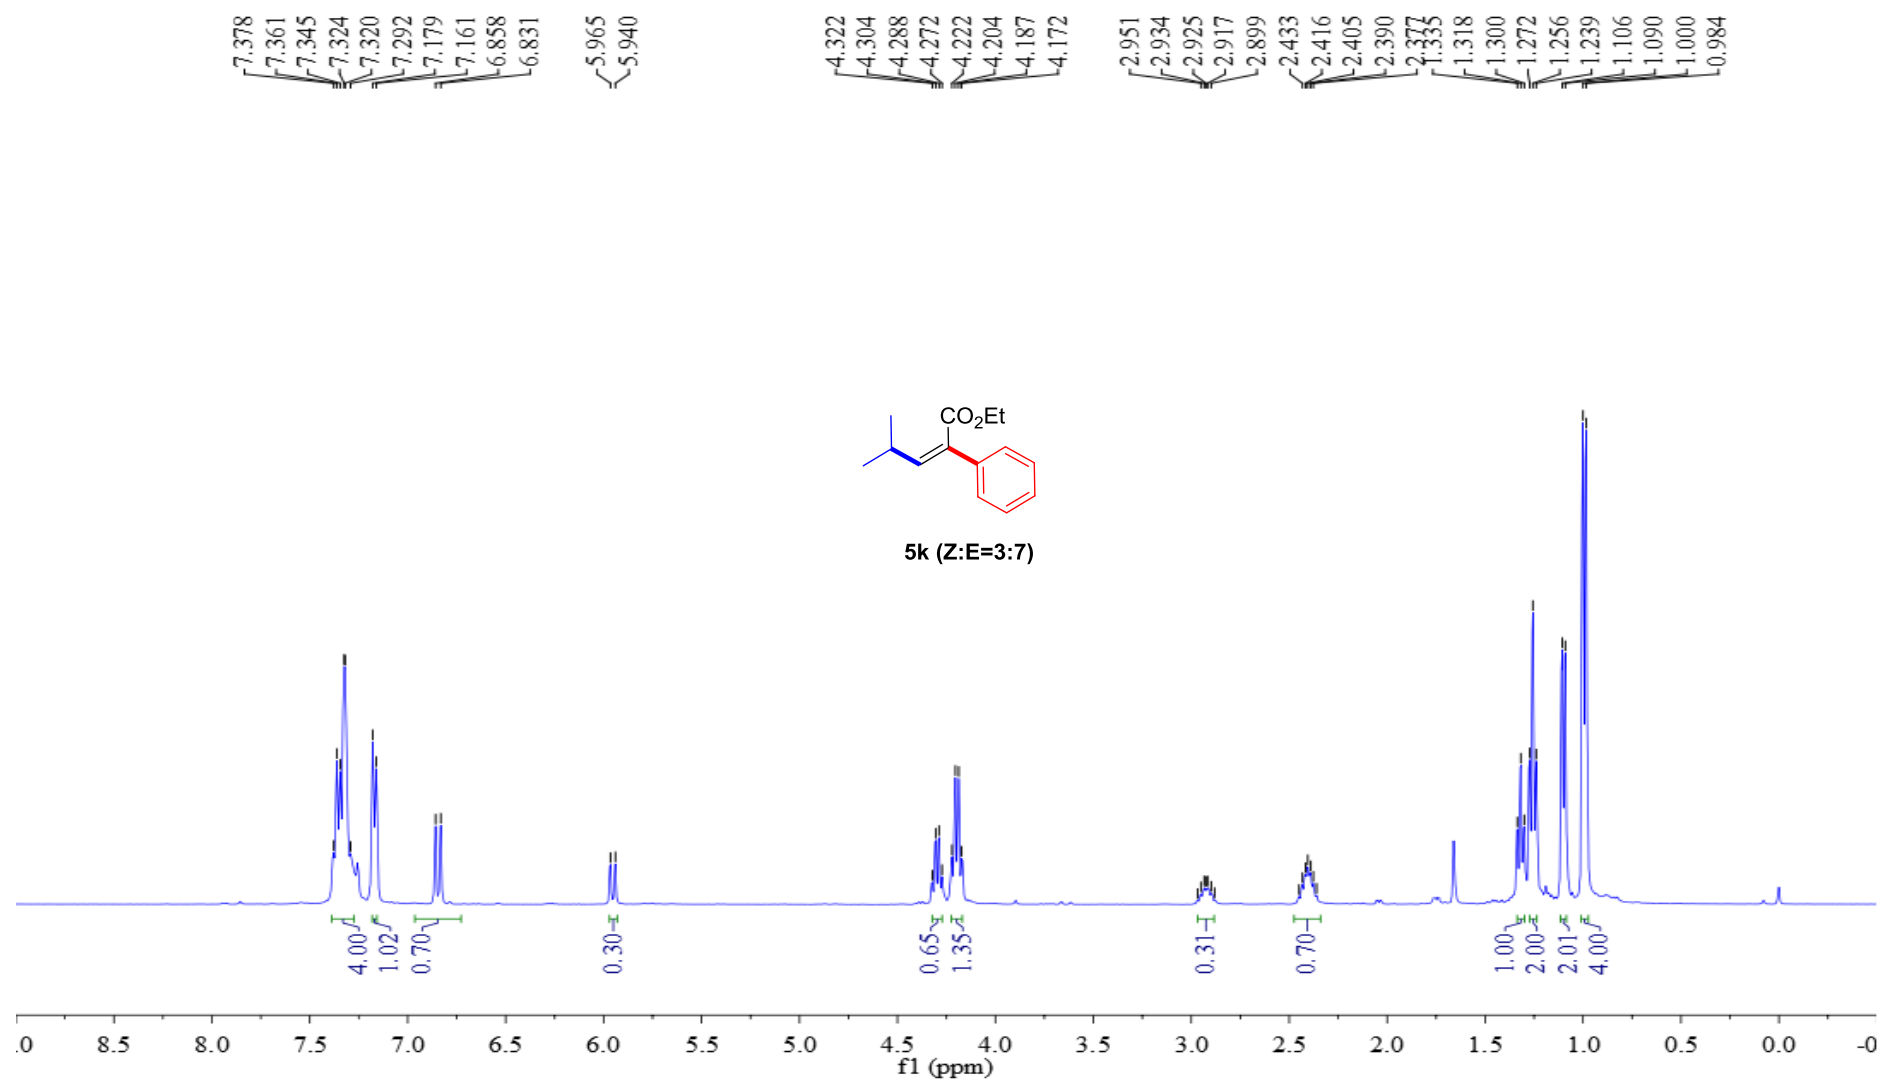

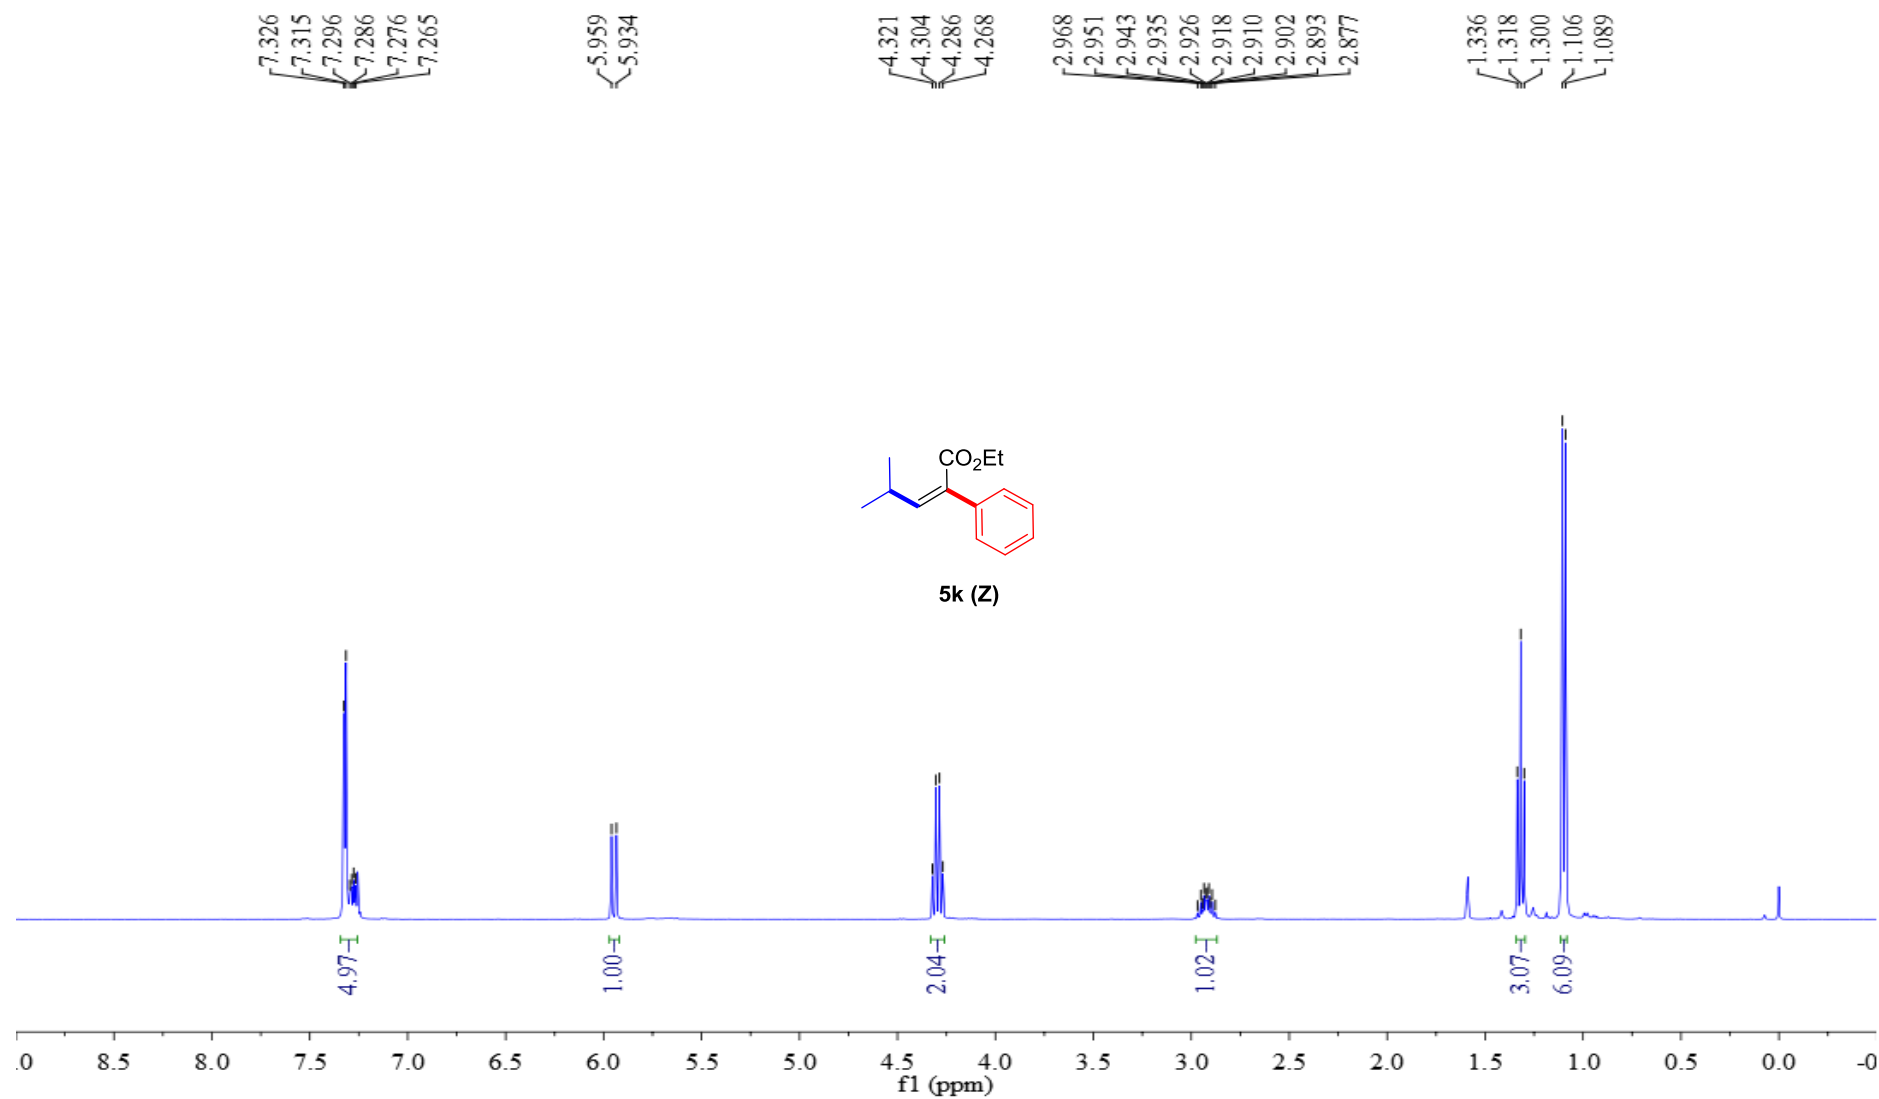

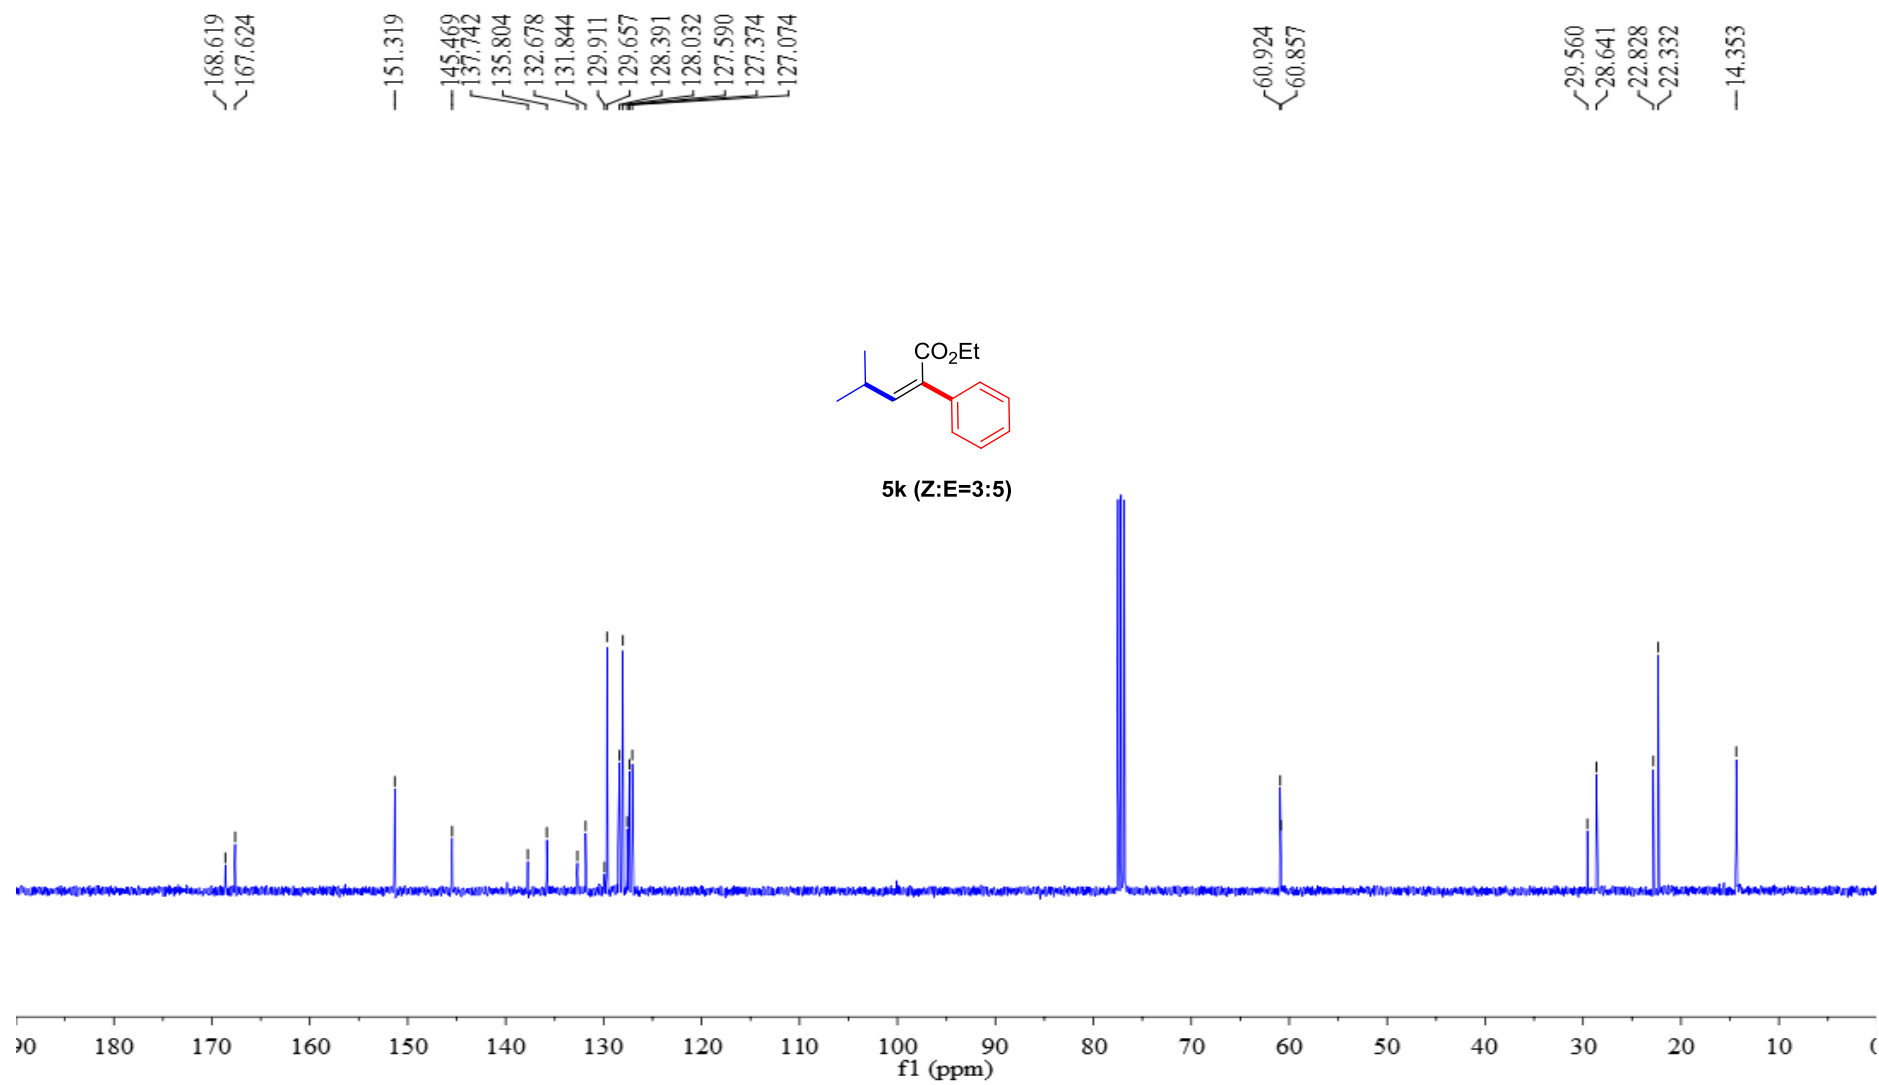

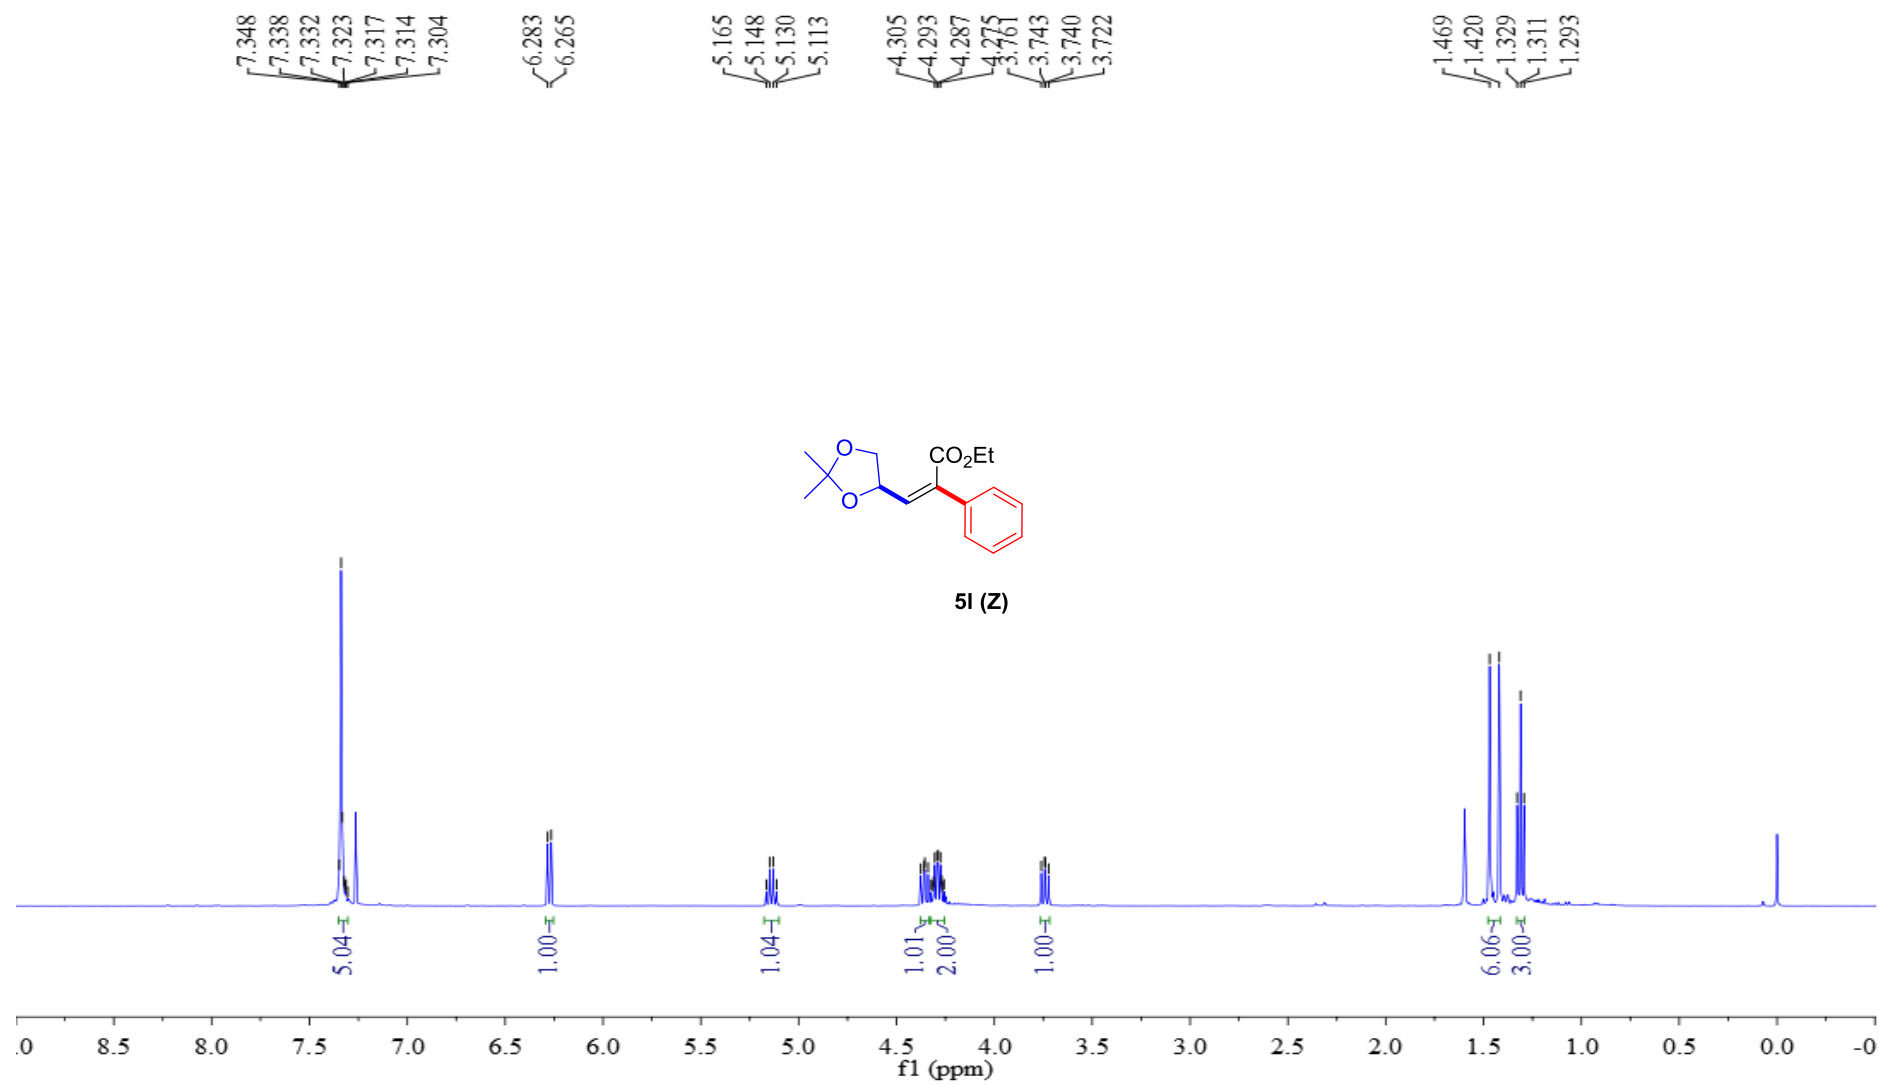

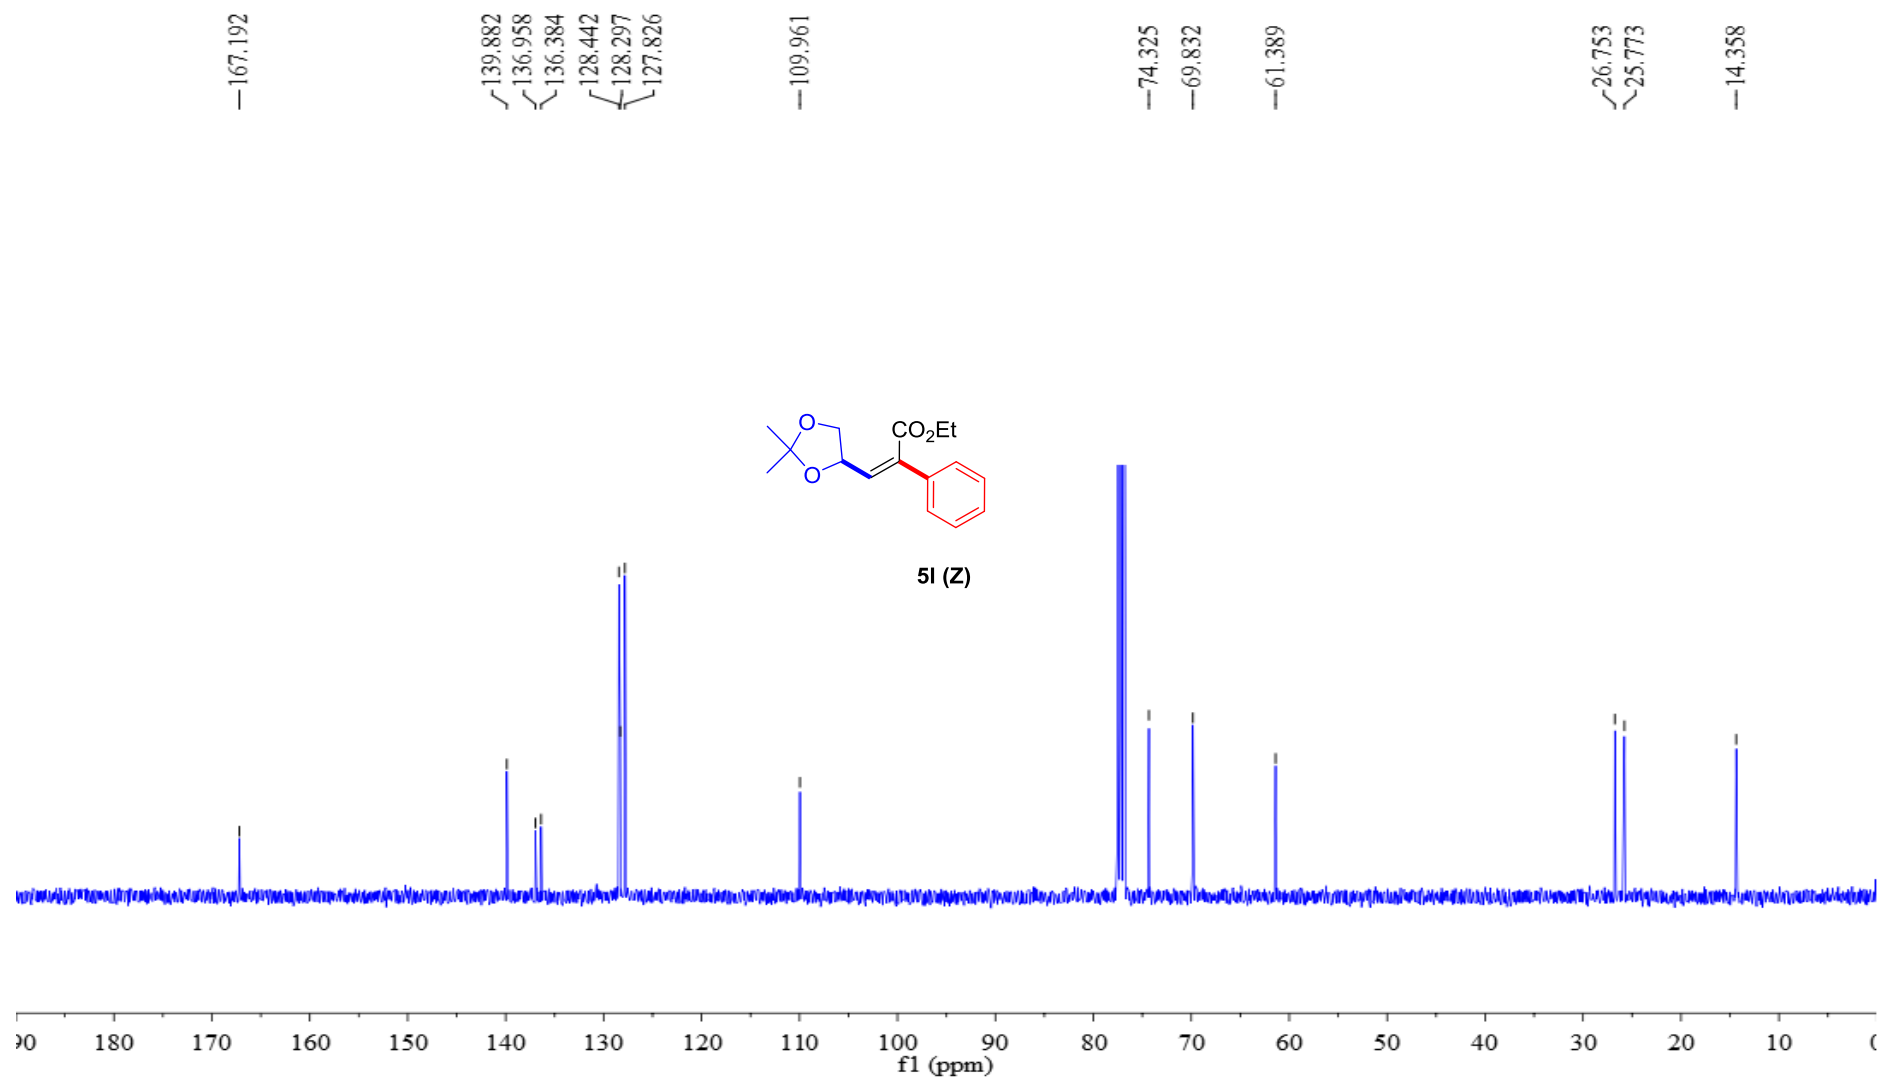

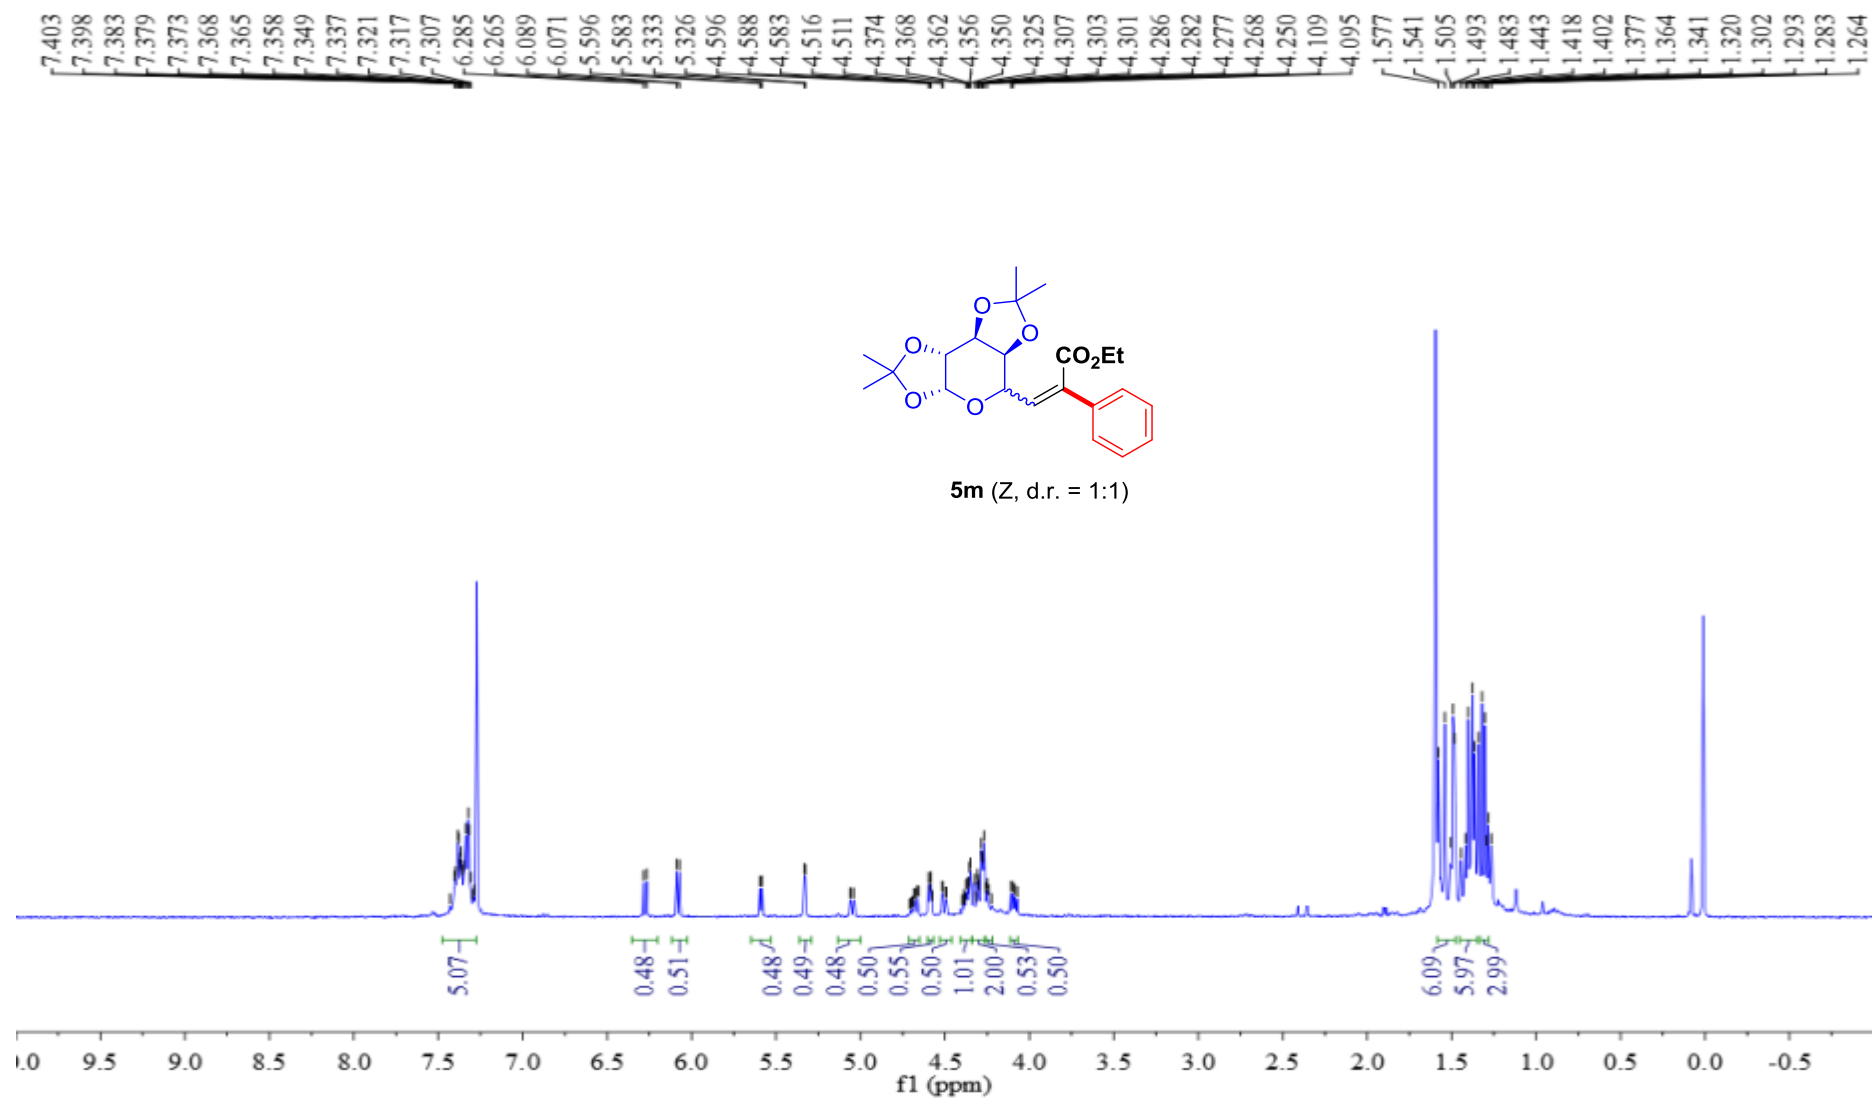

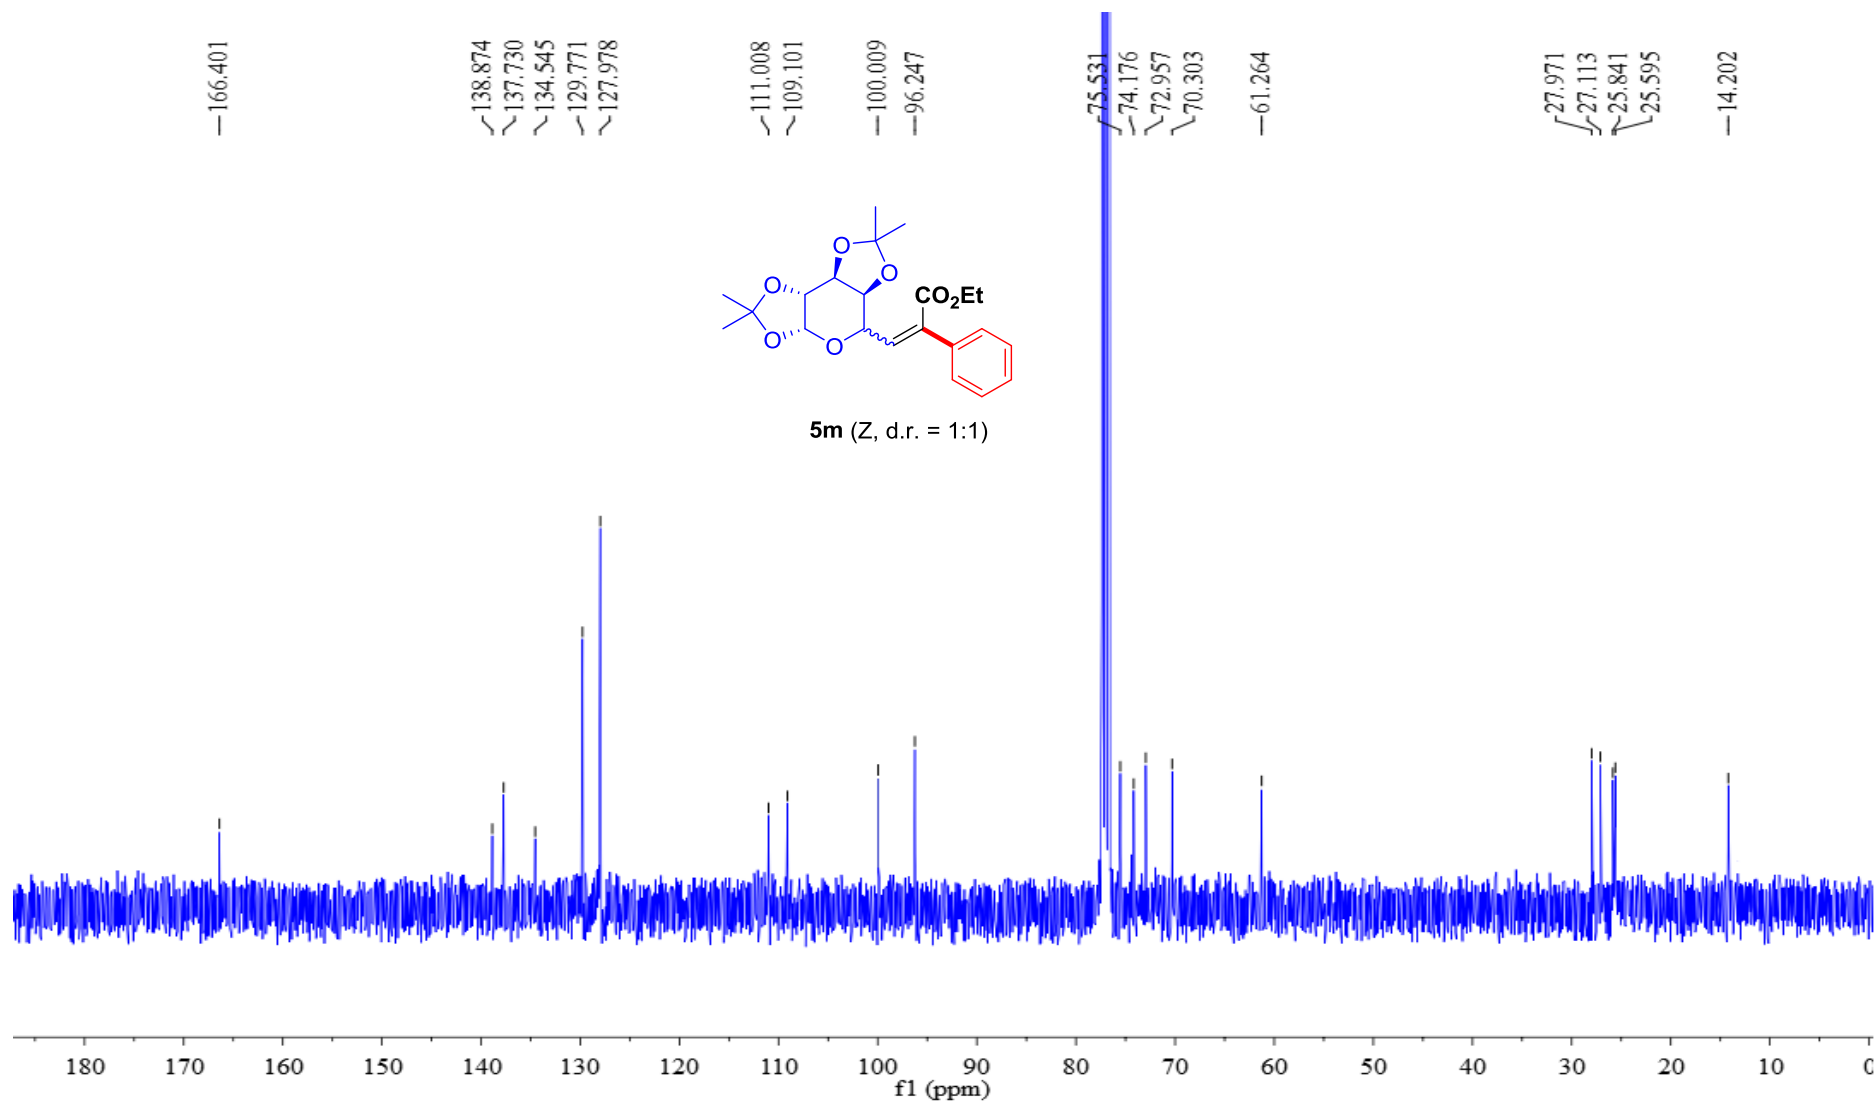



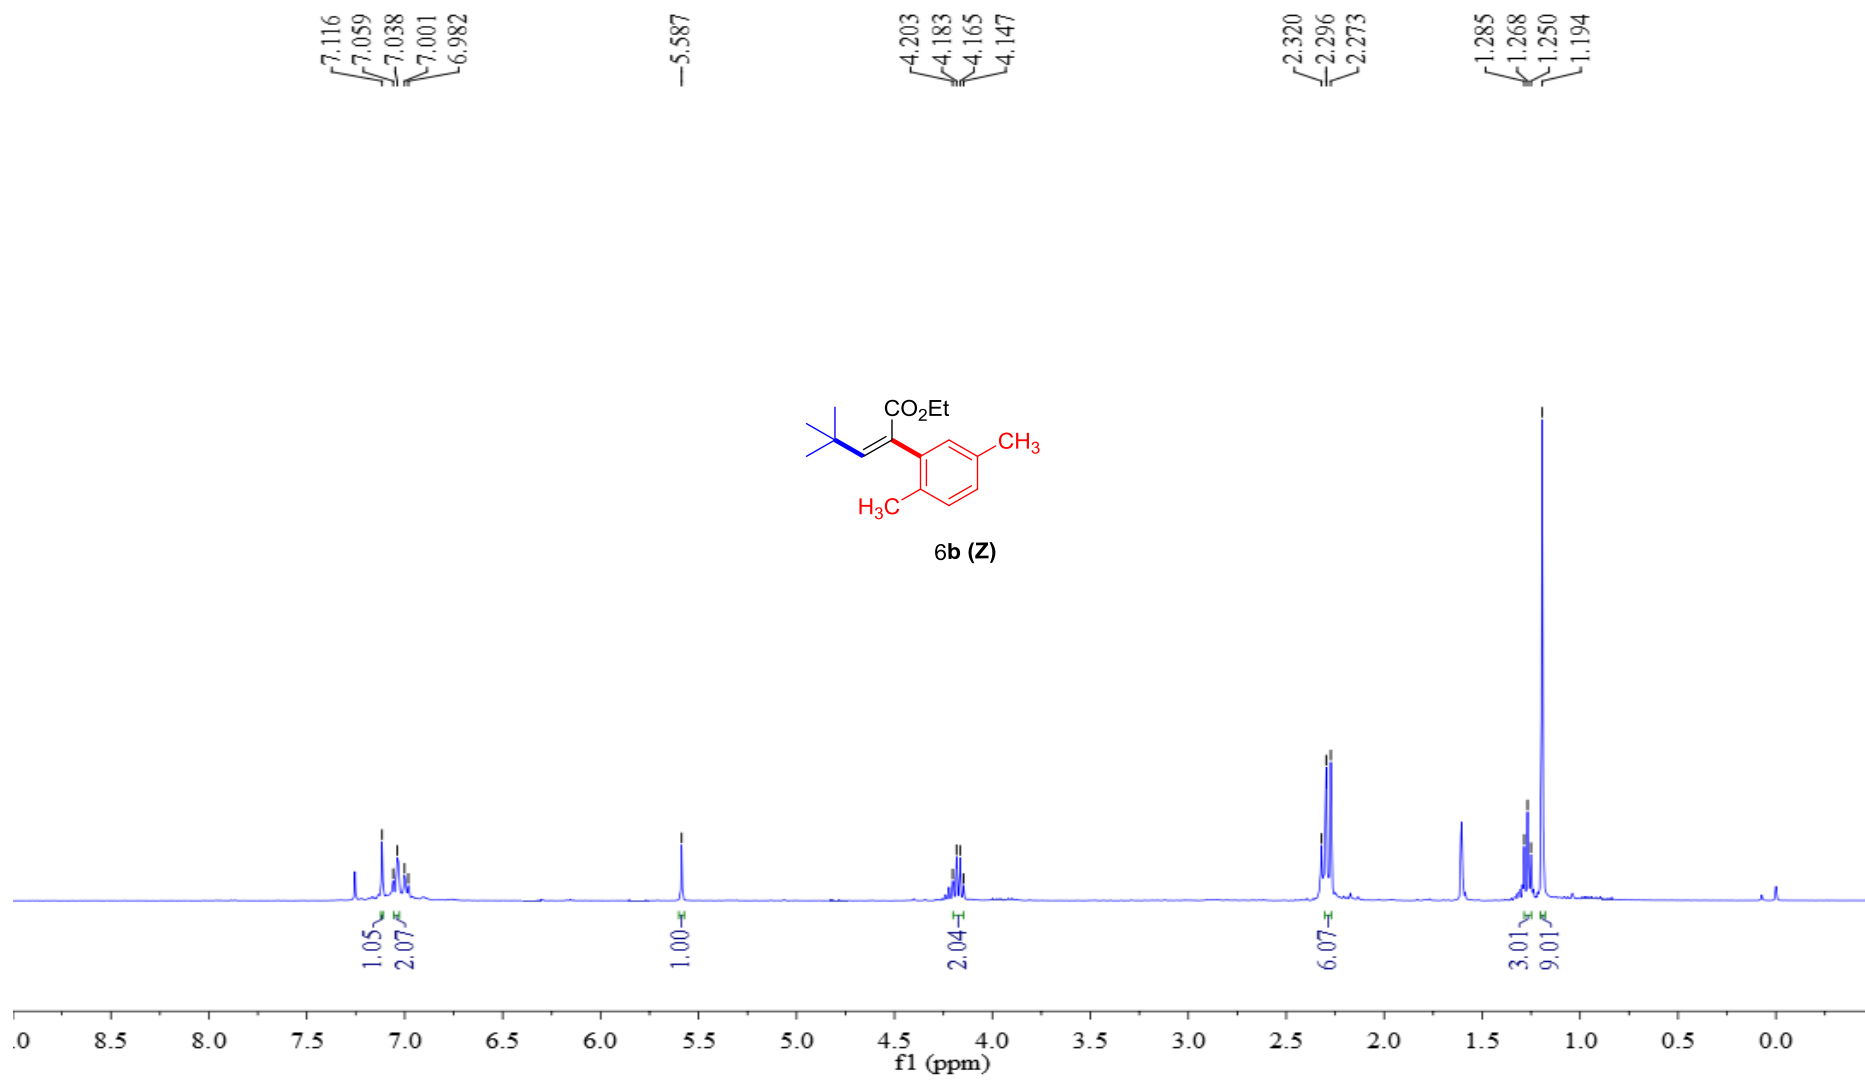

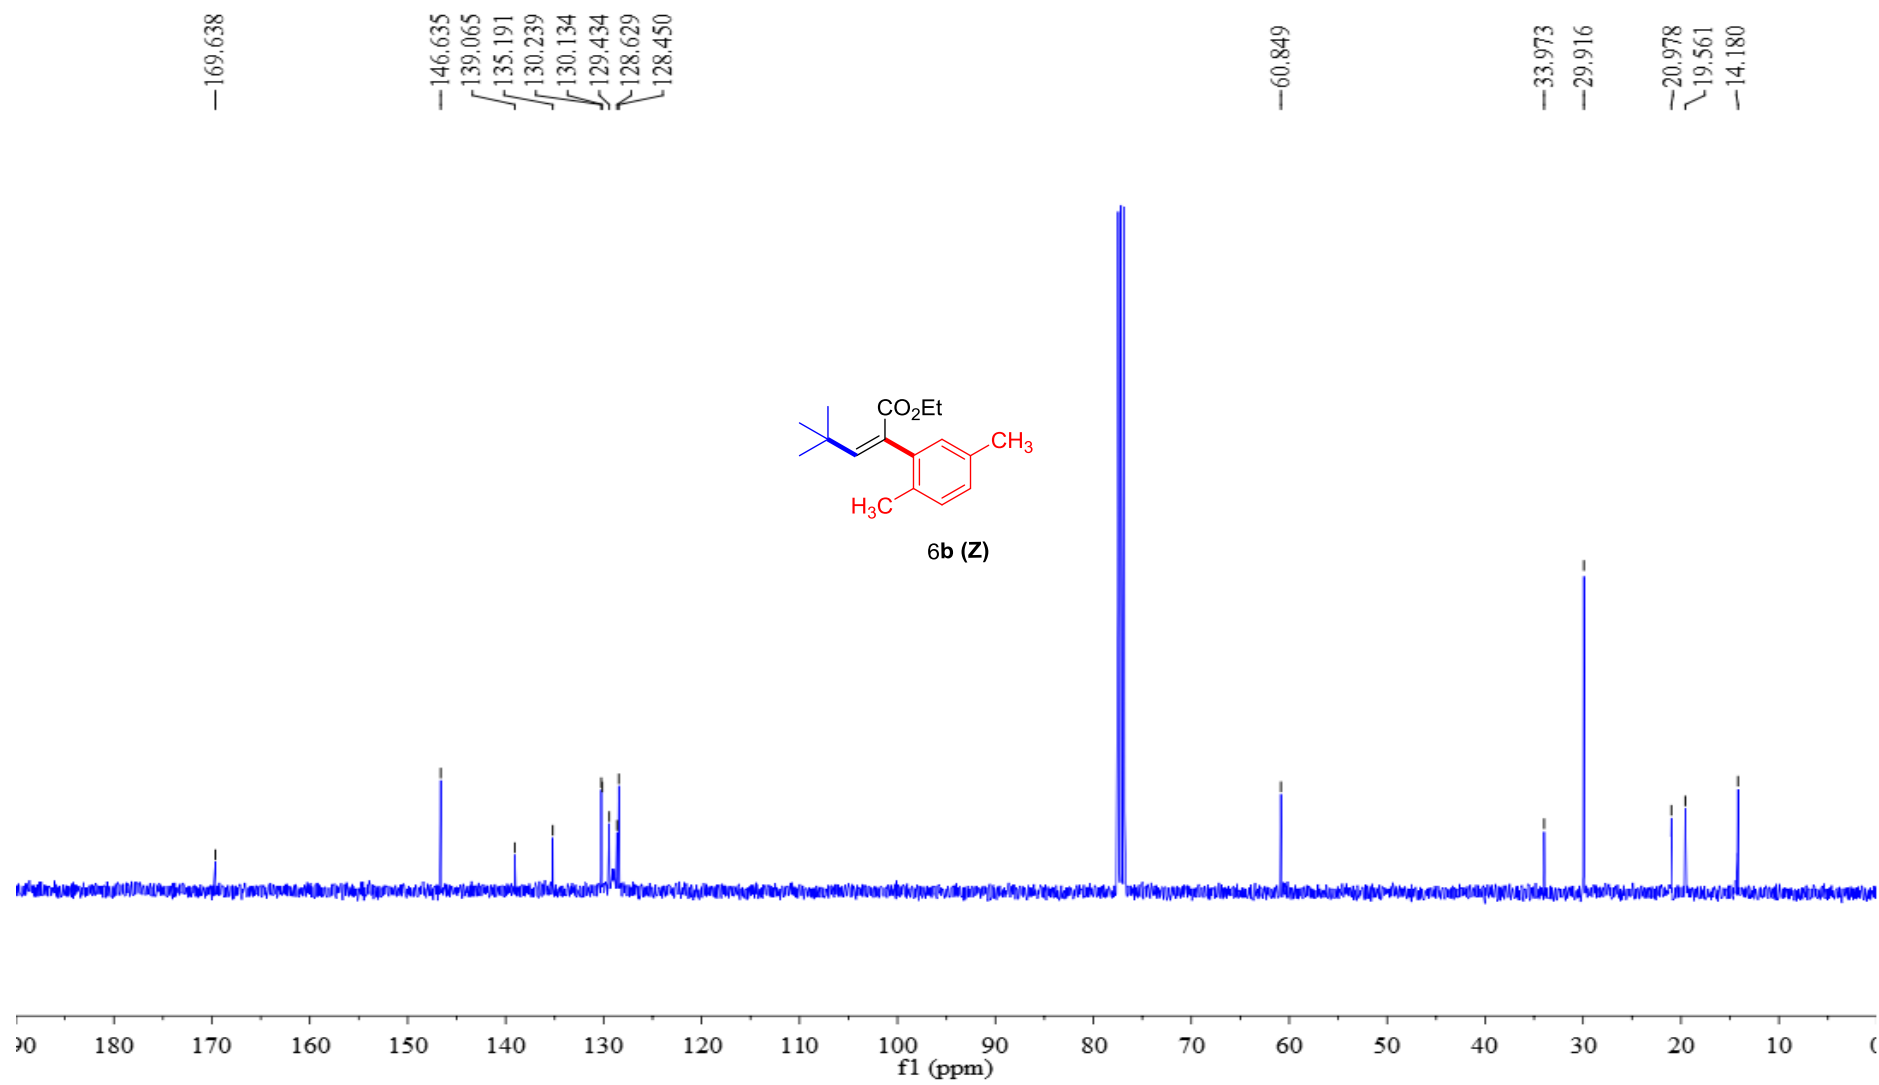

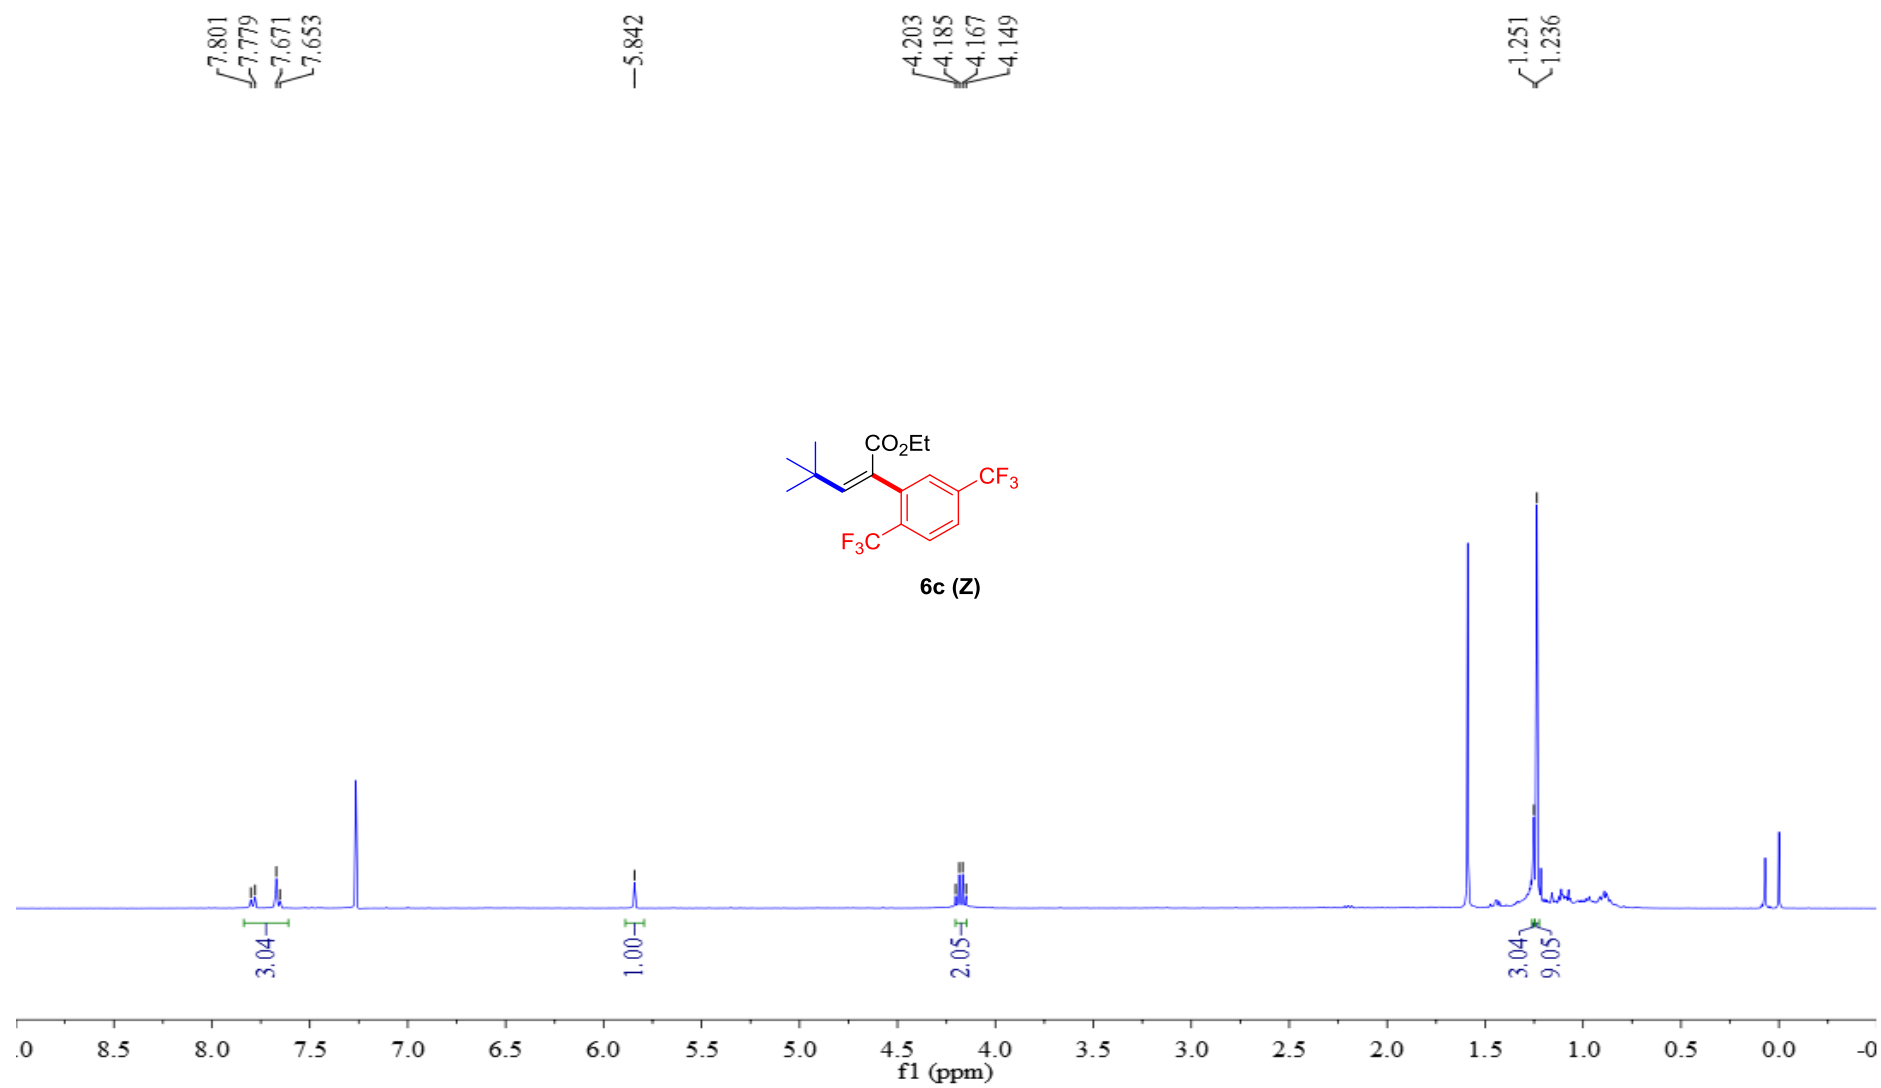

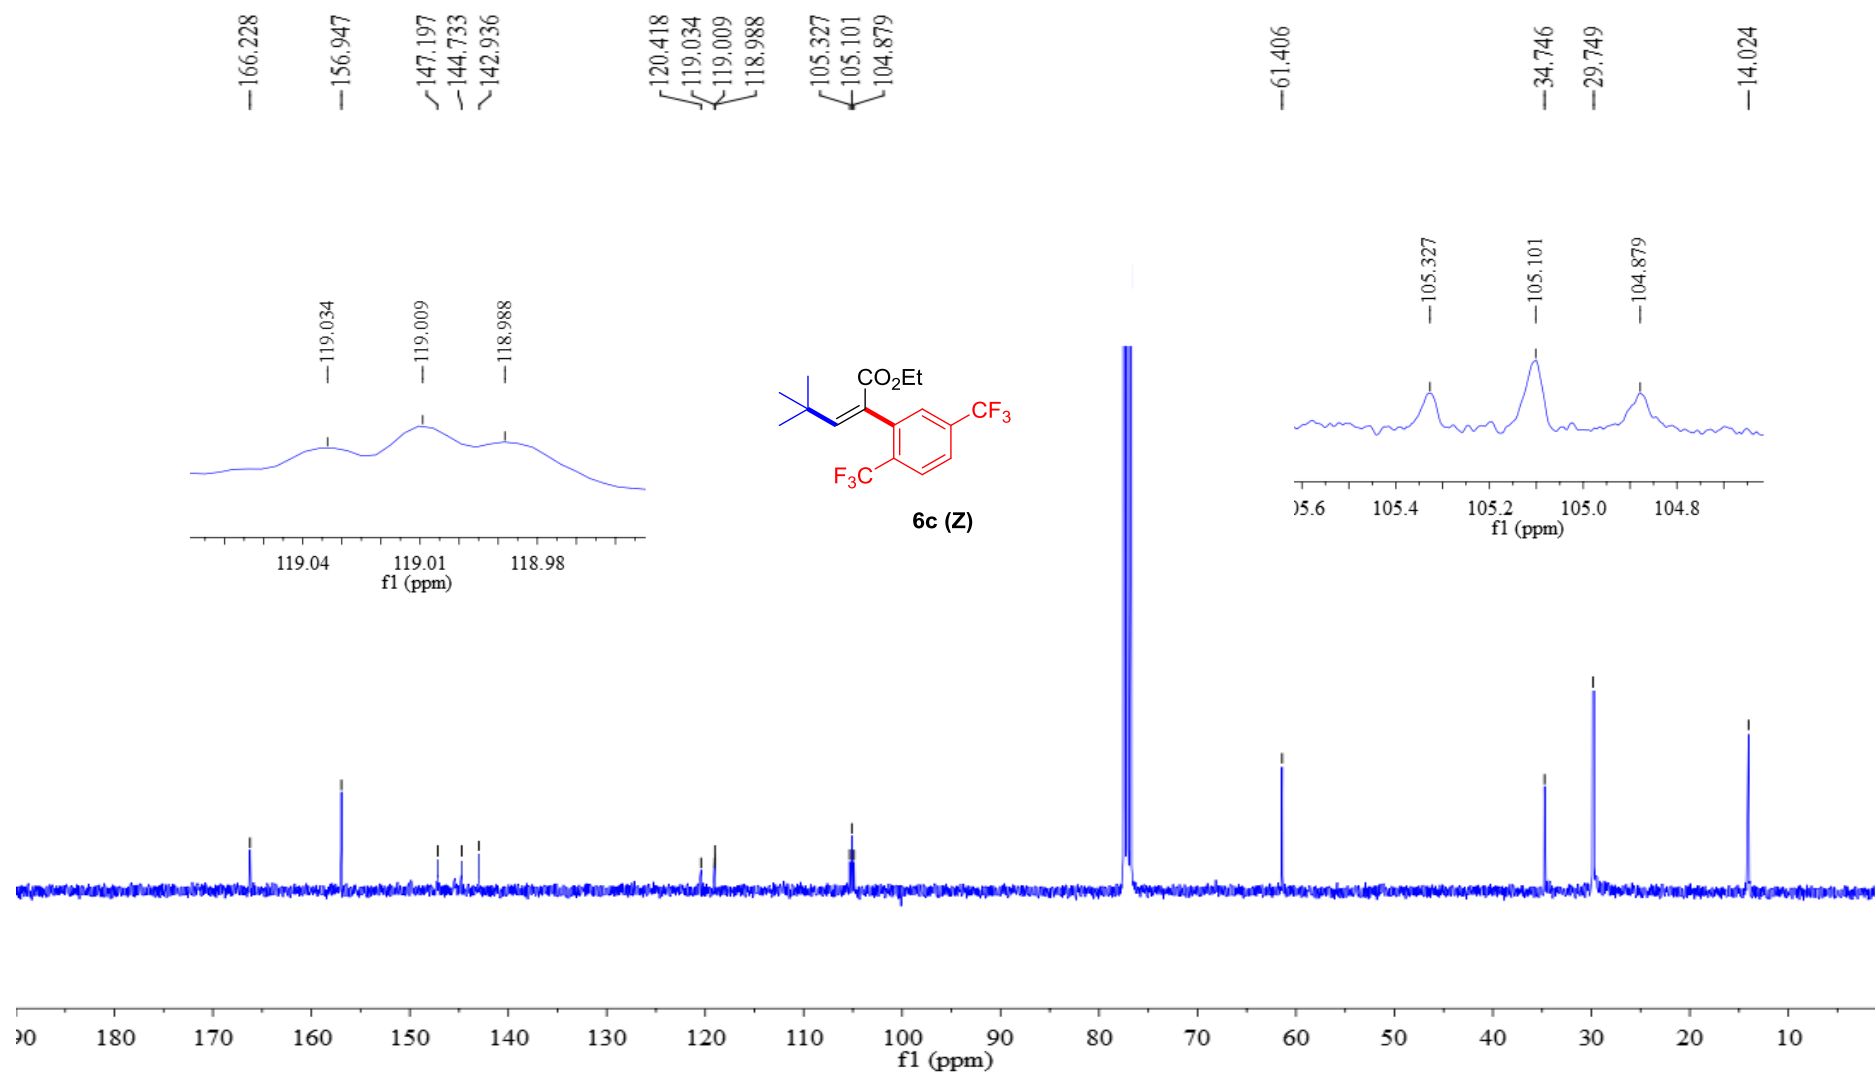

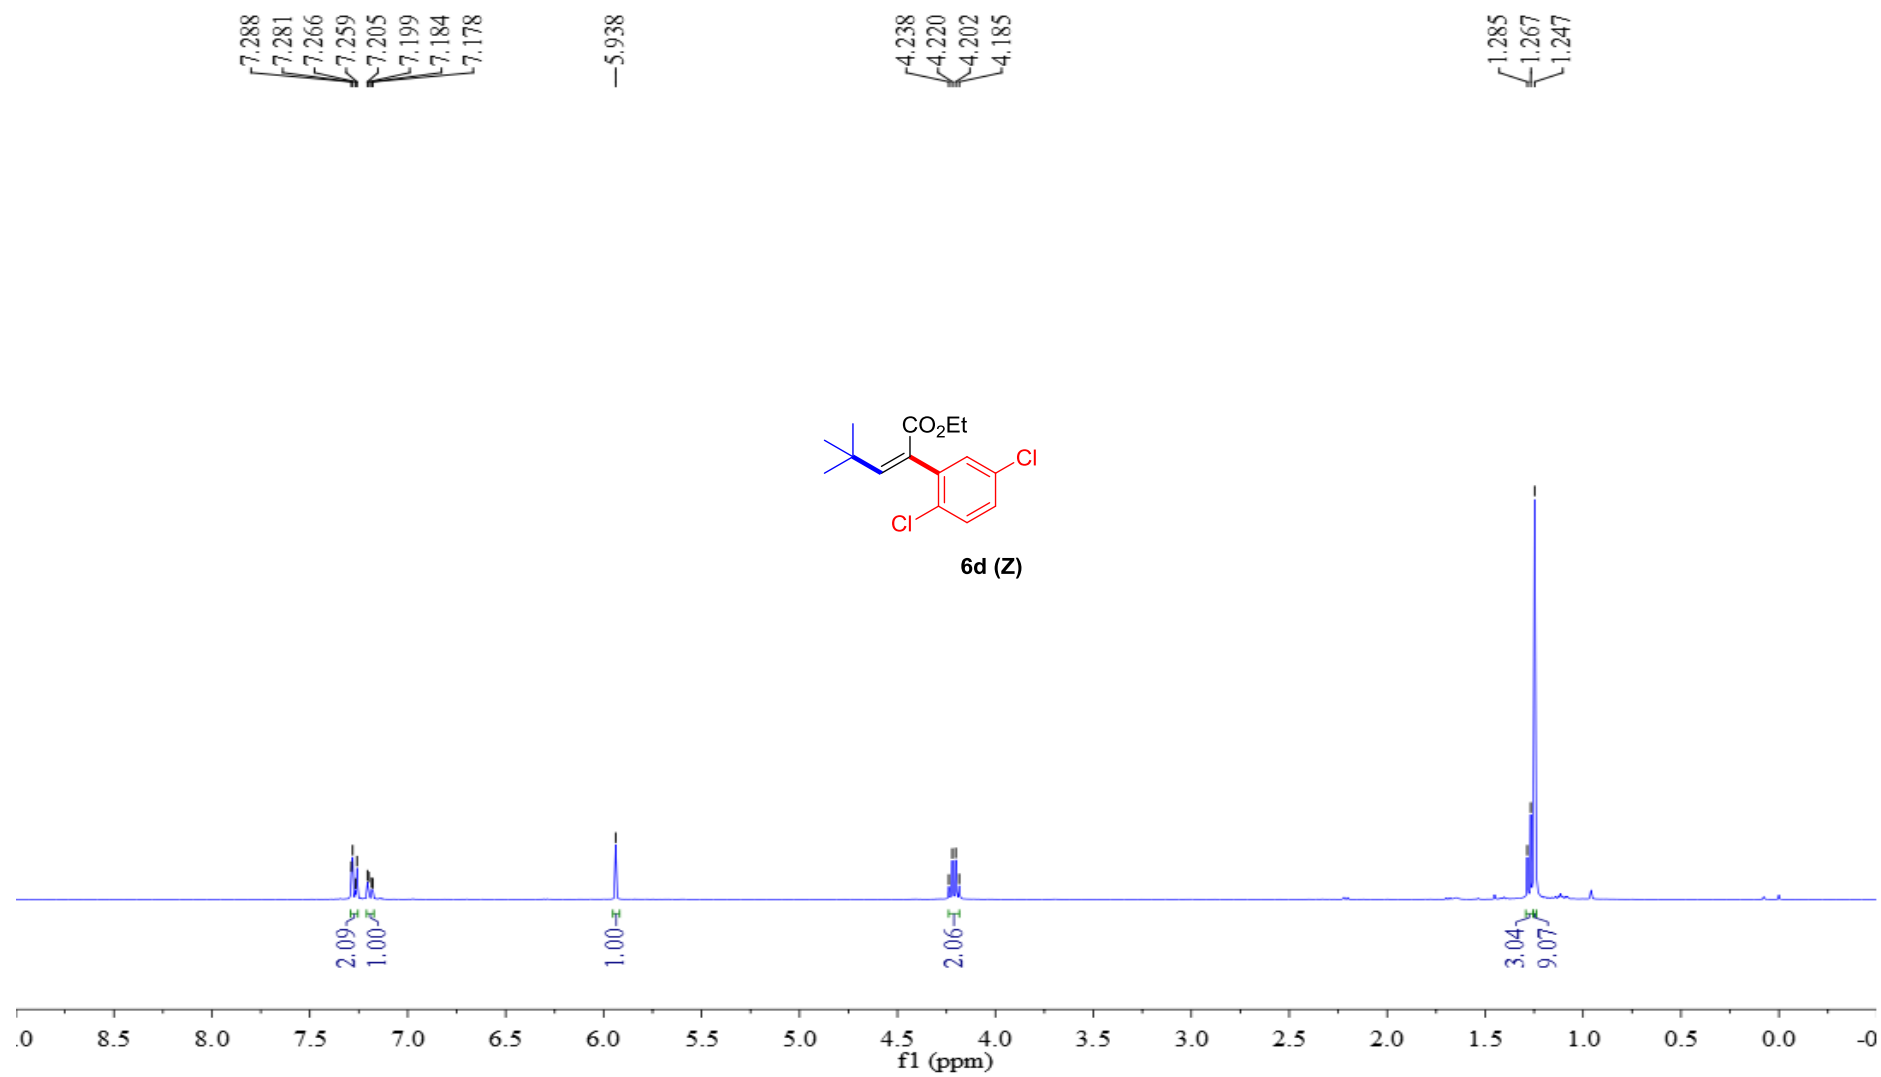

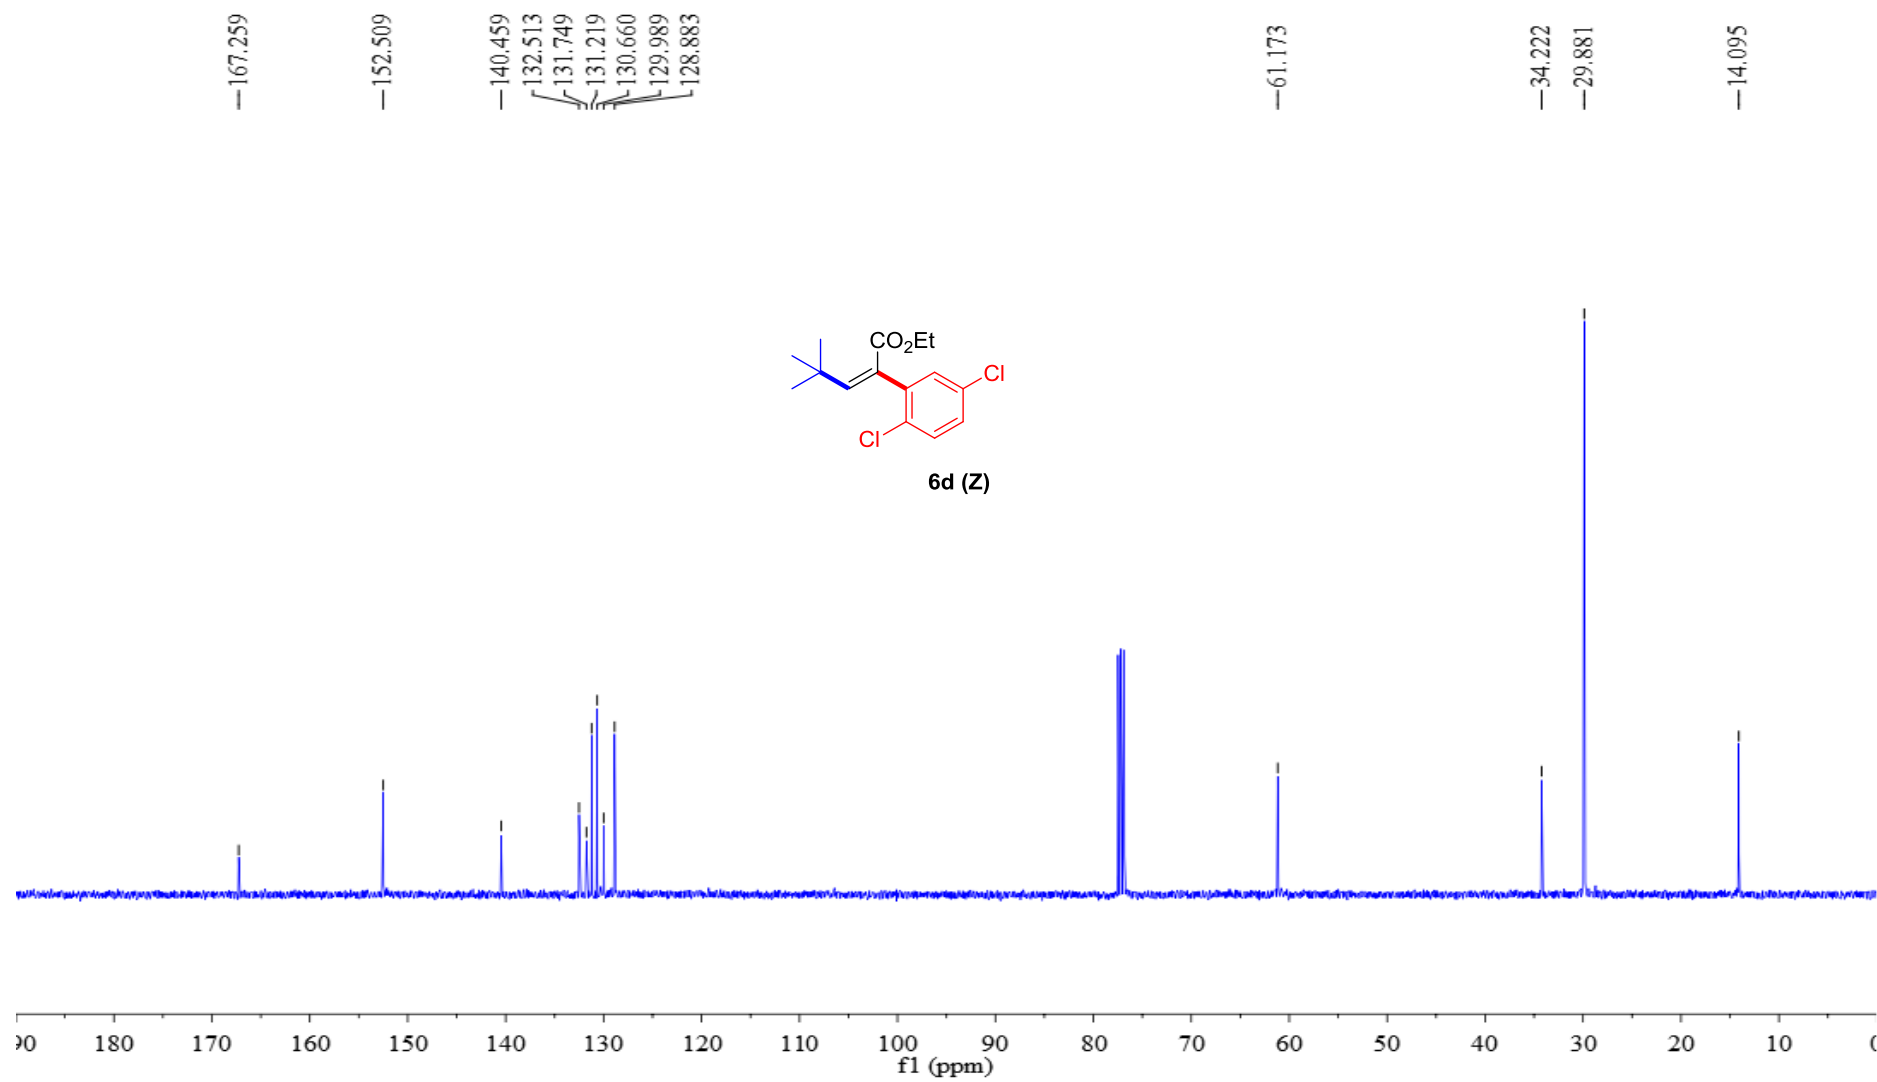

丰度

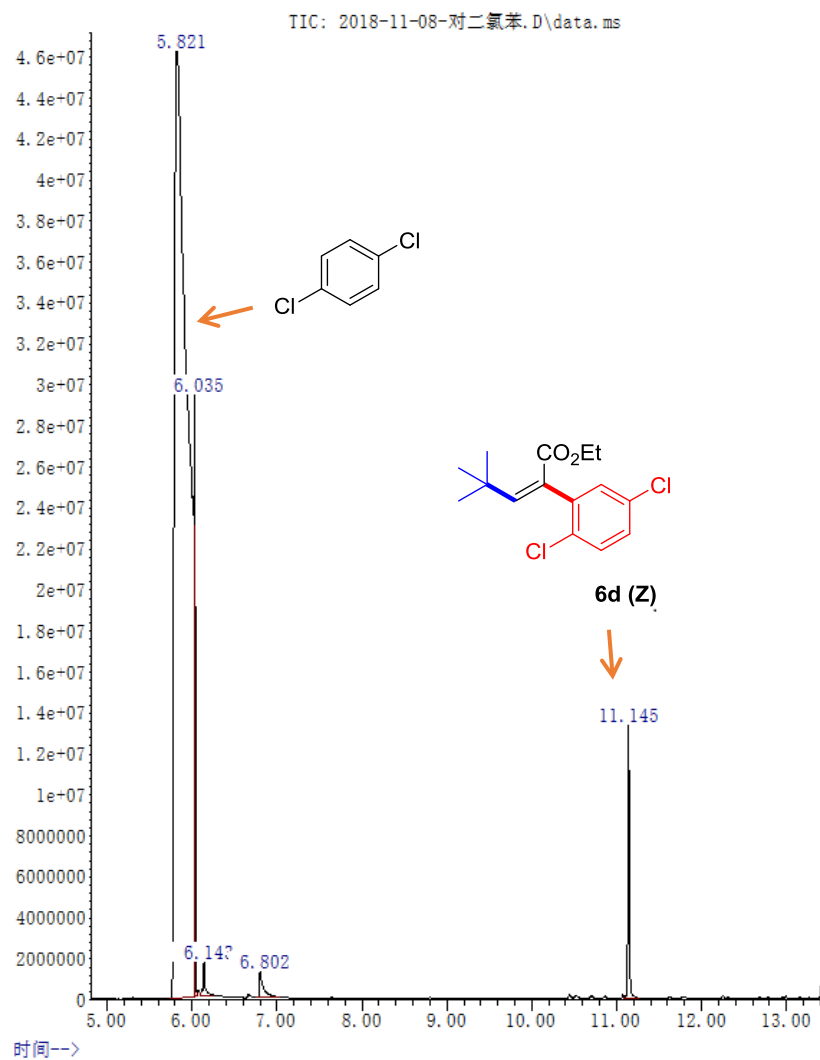

丰度

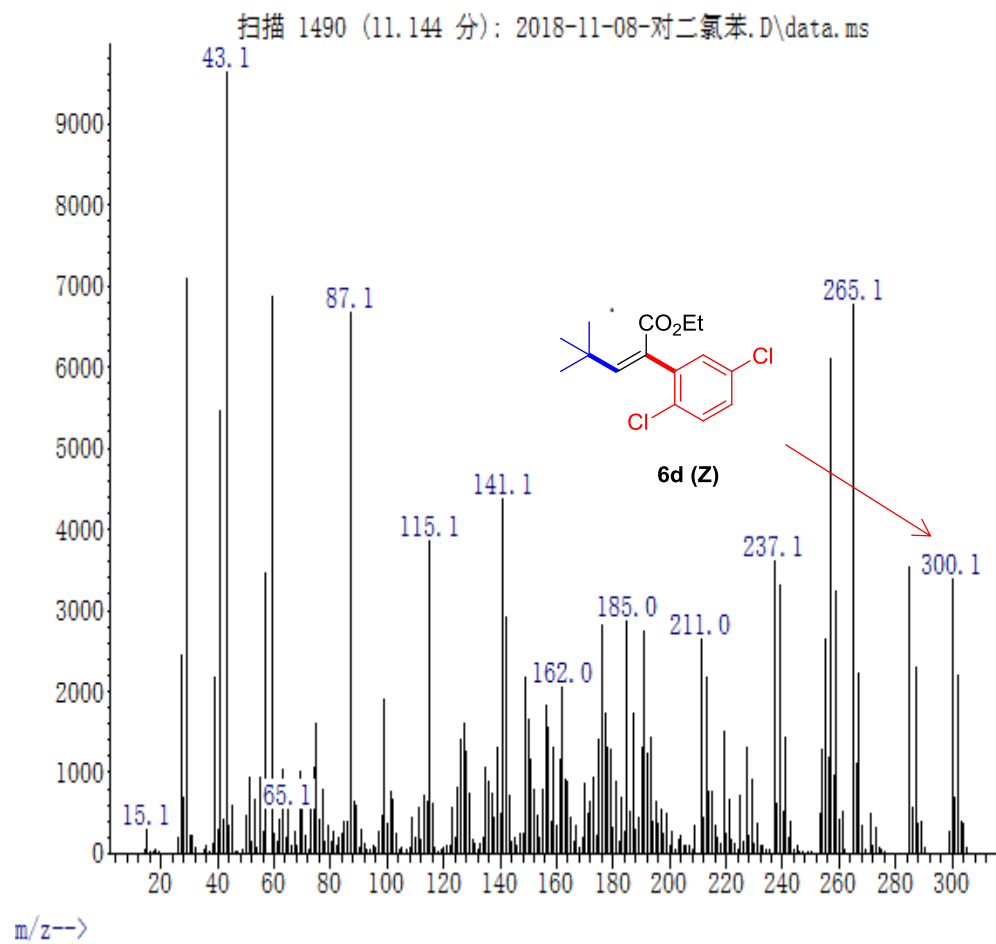

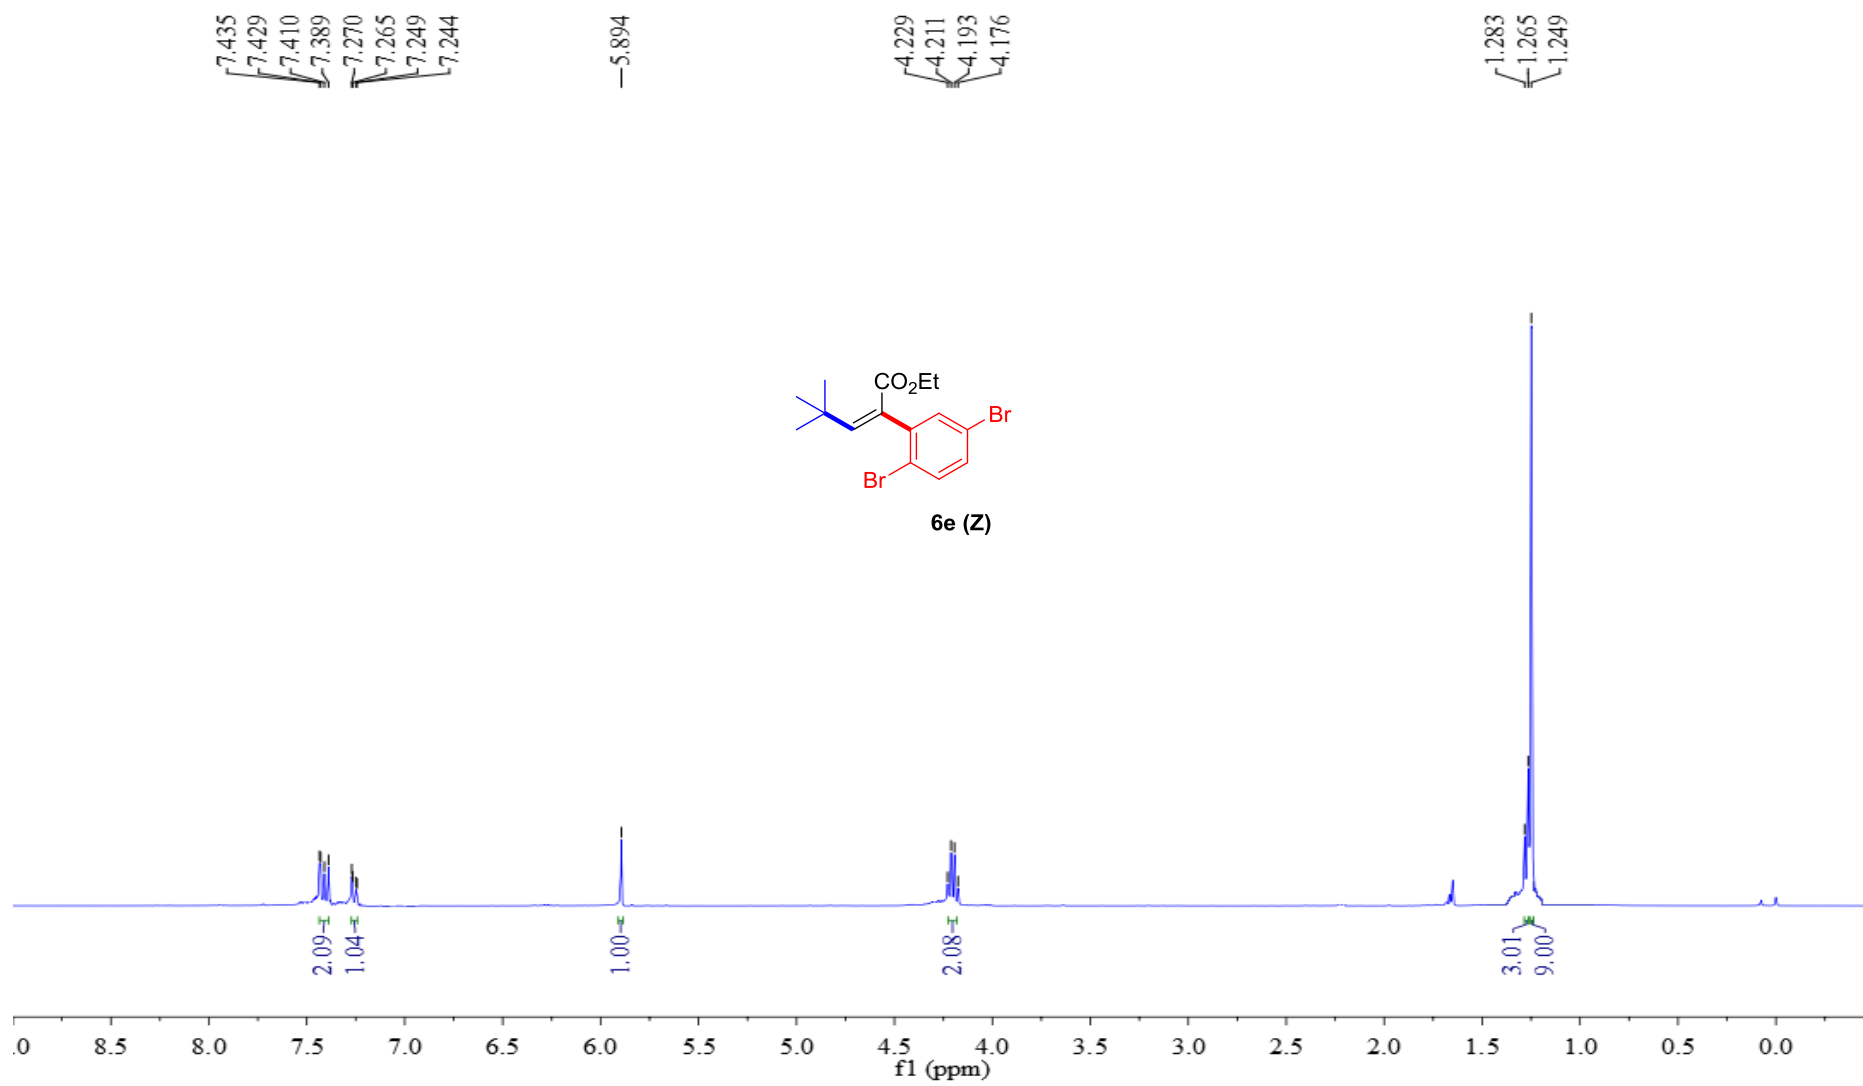



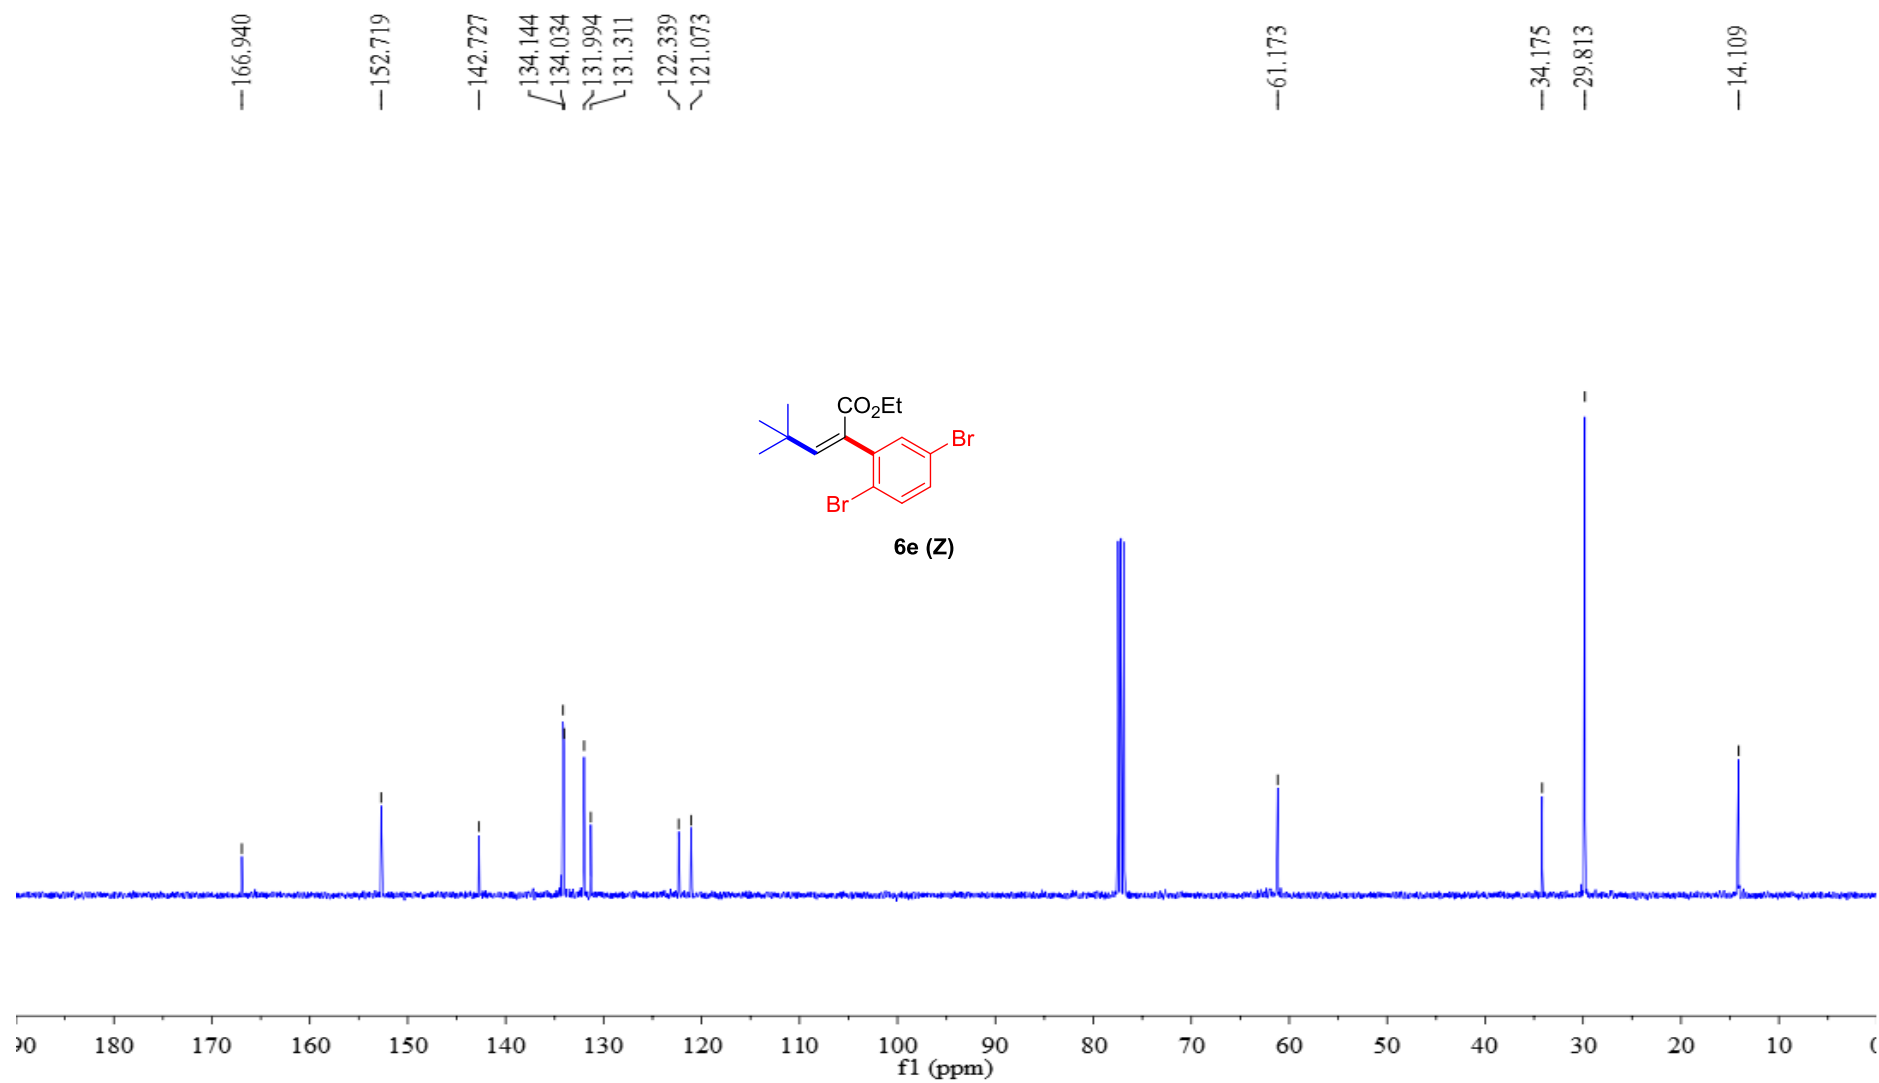

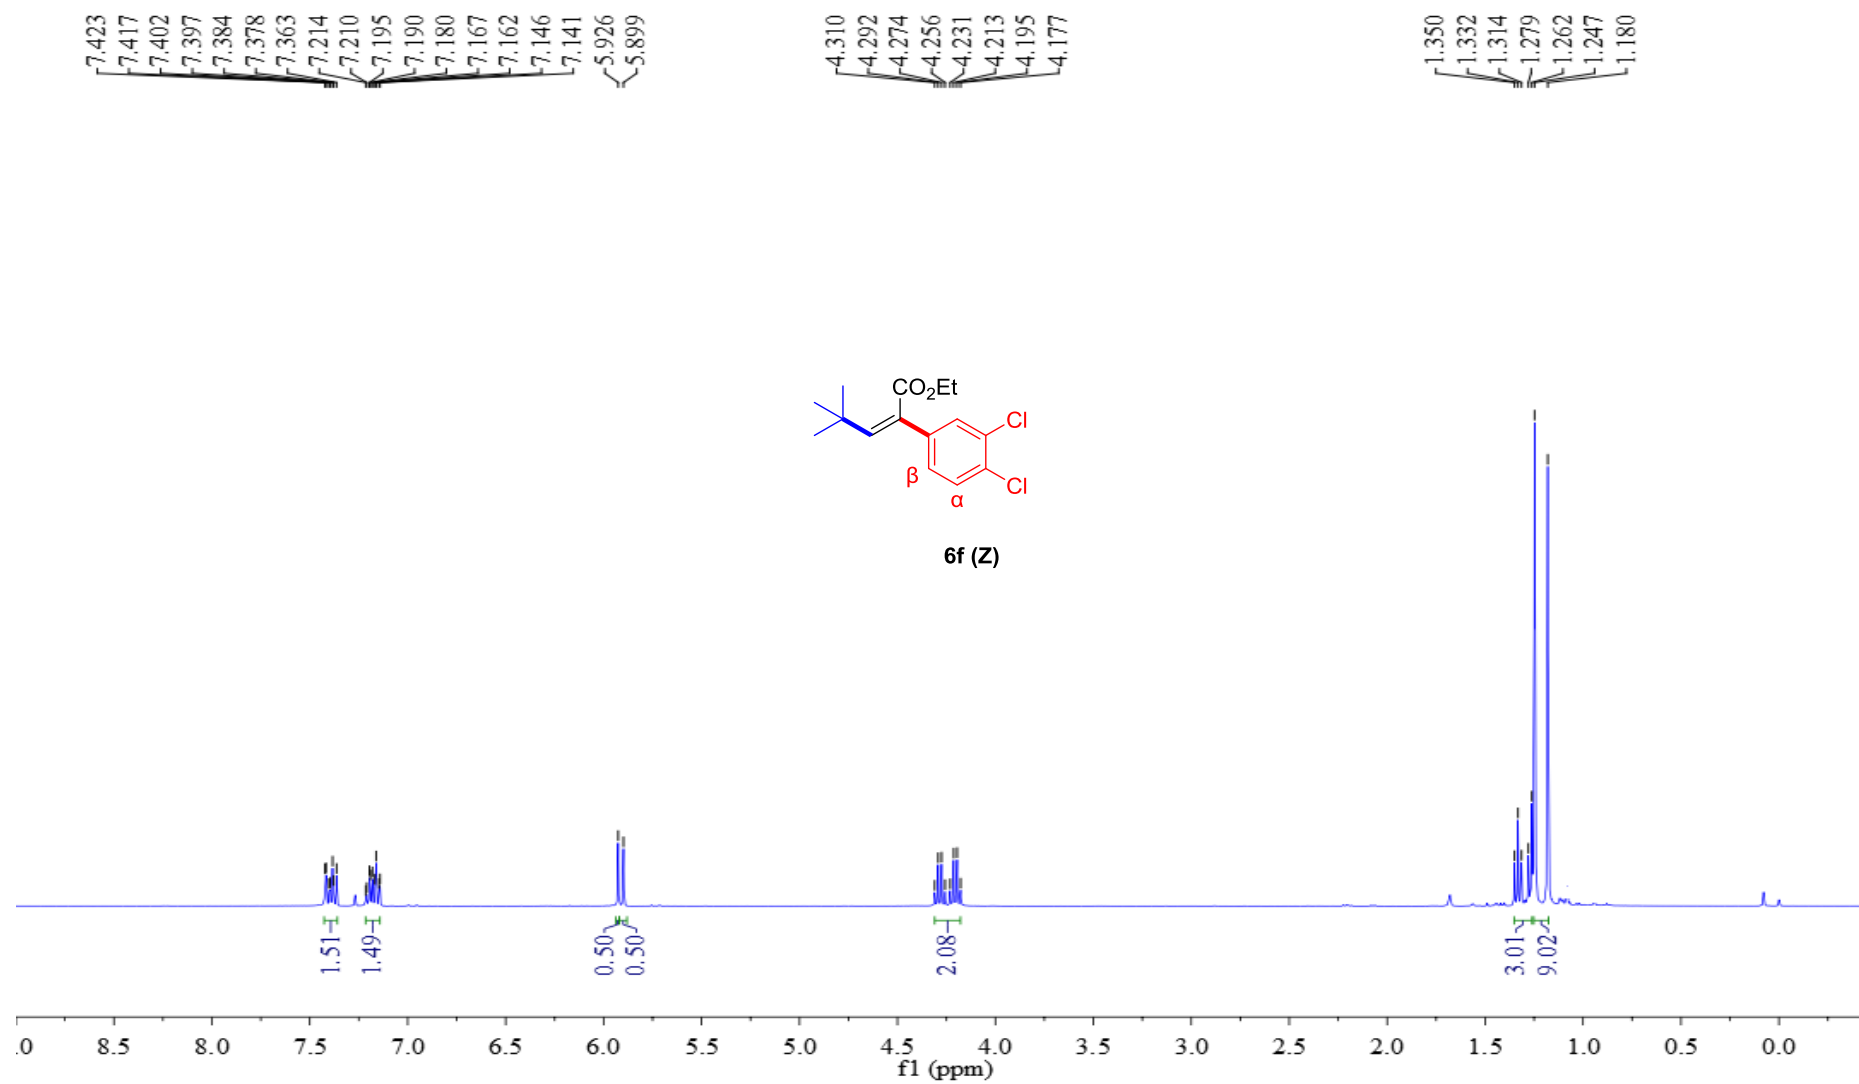

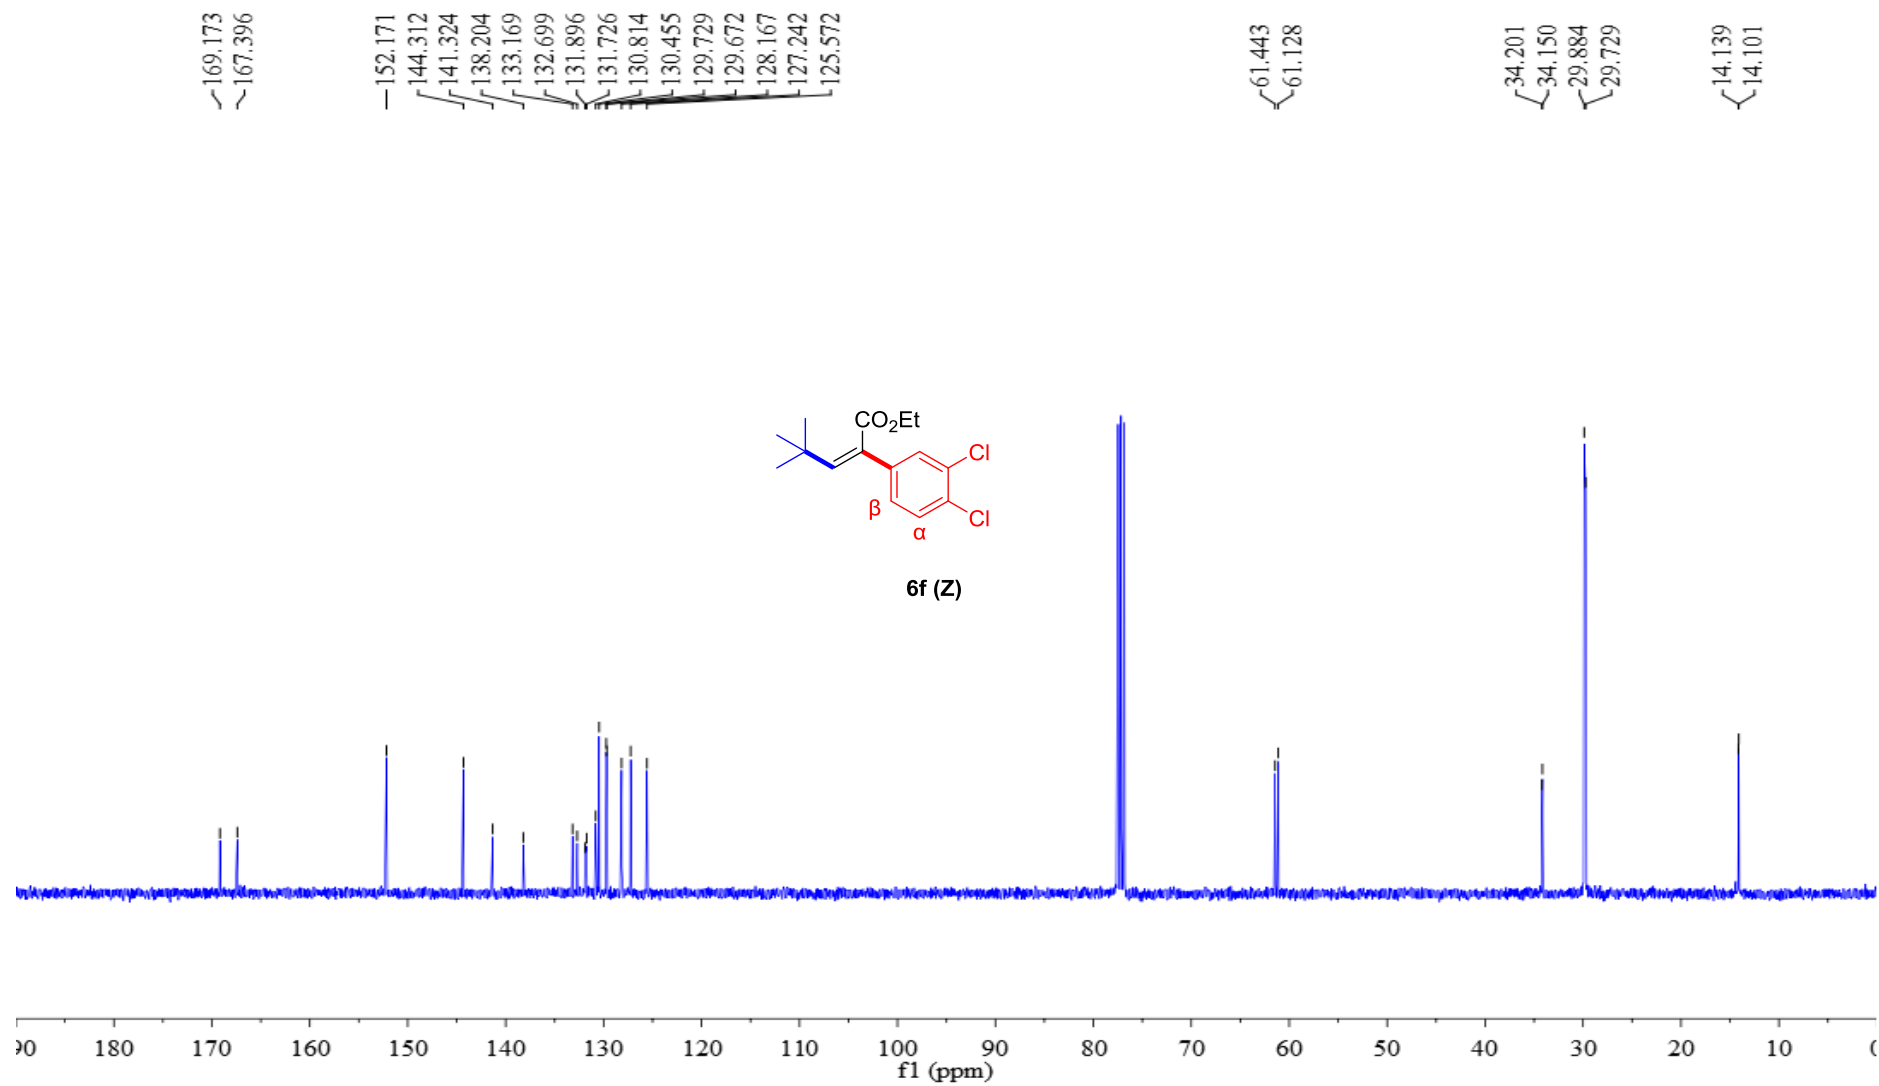

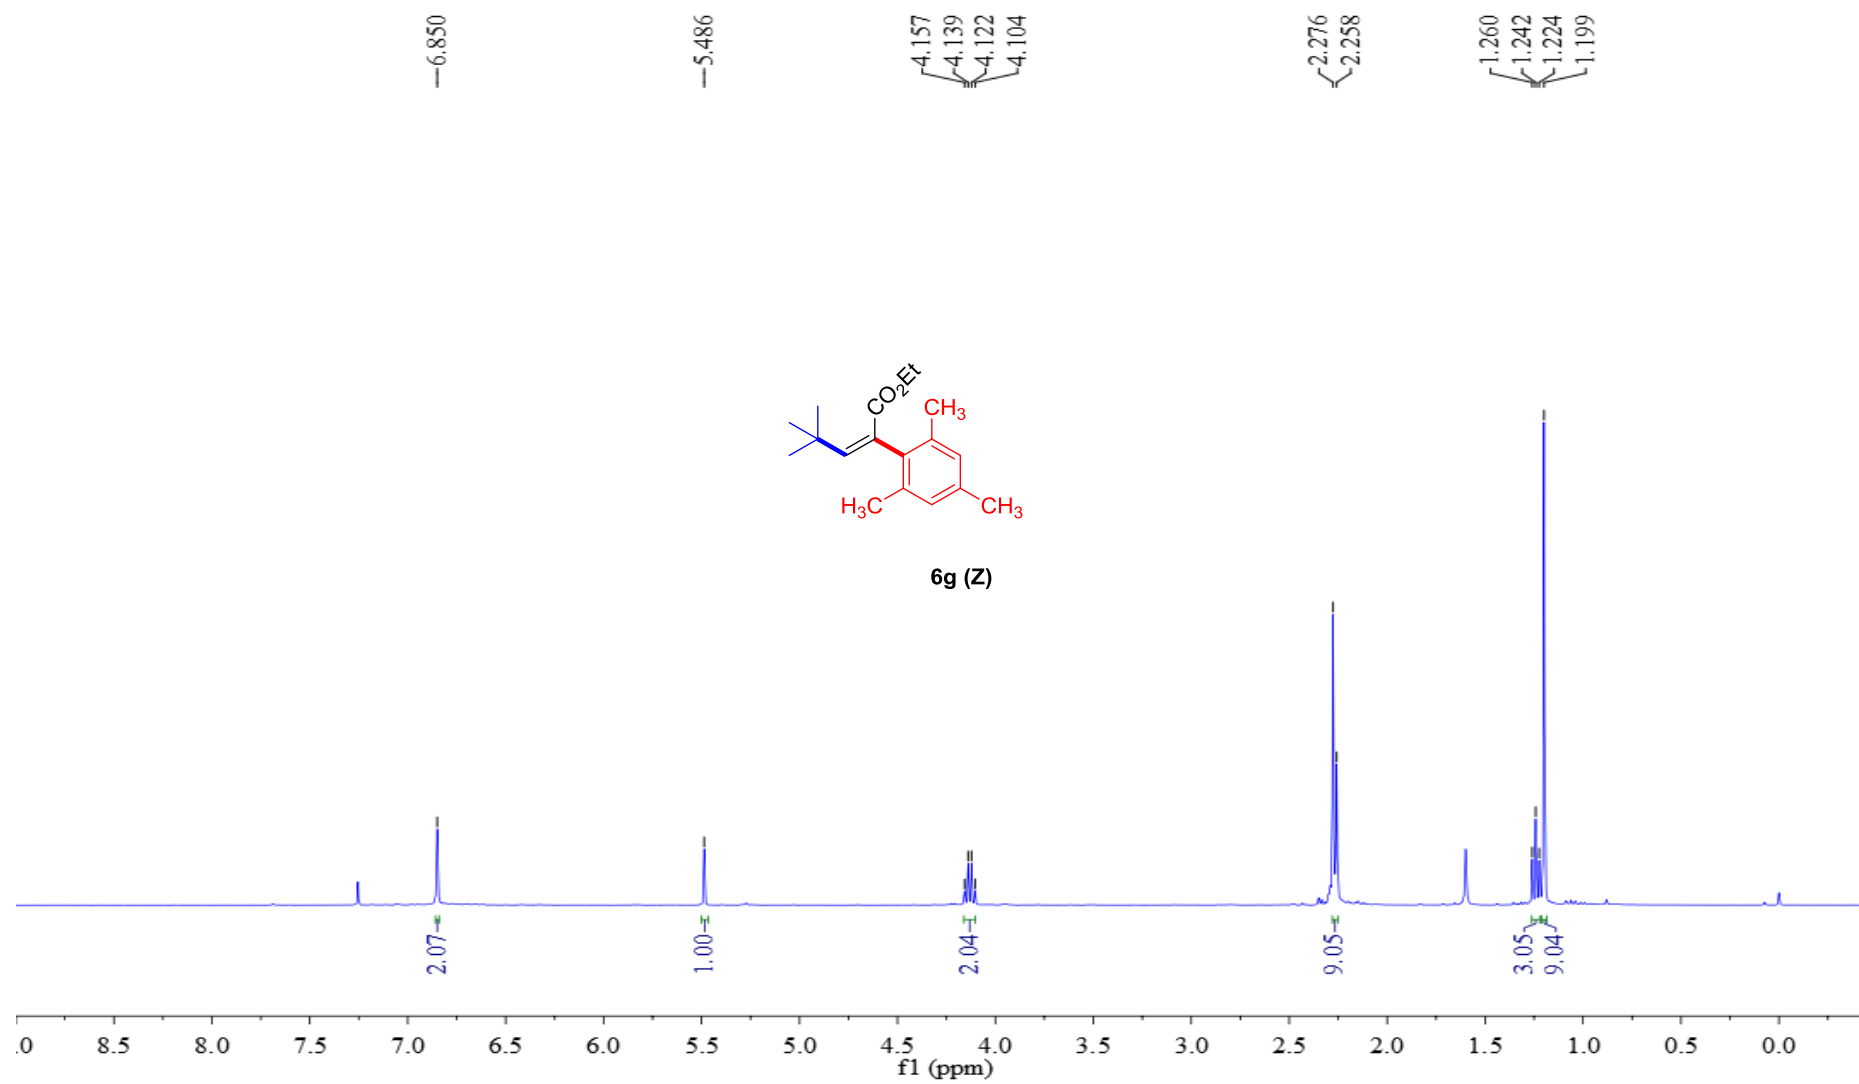

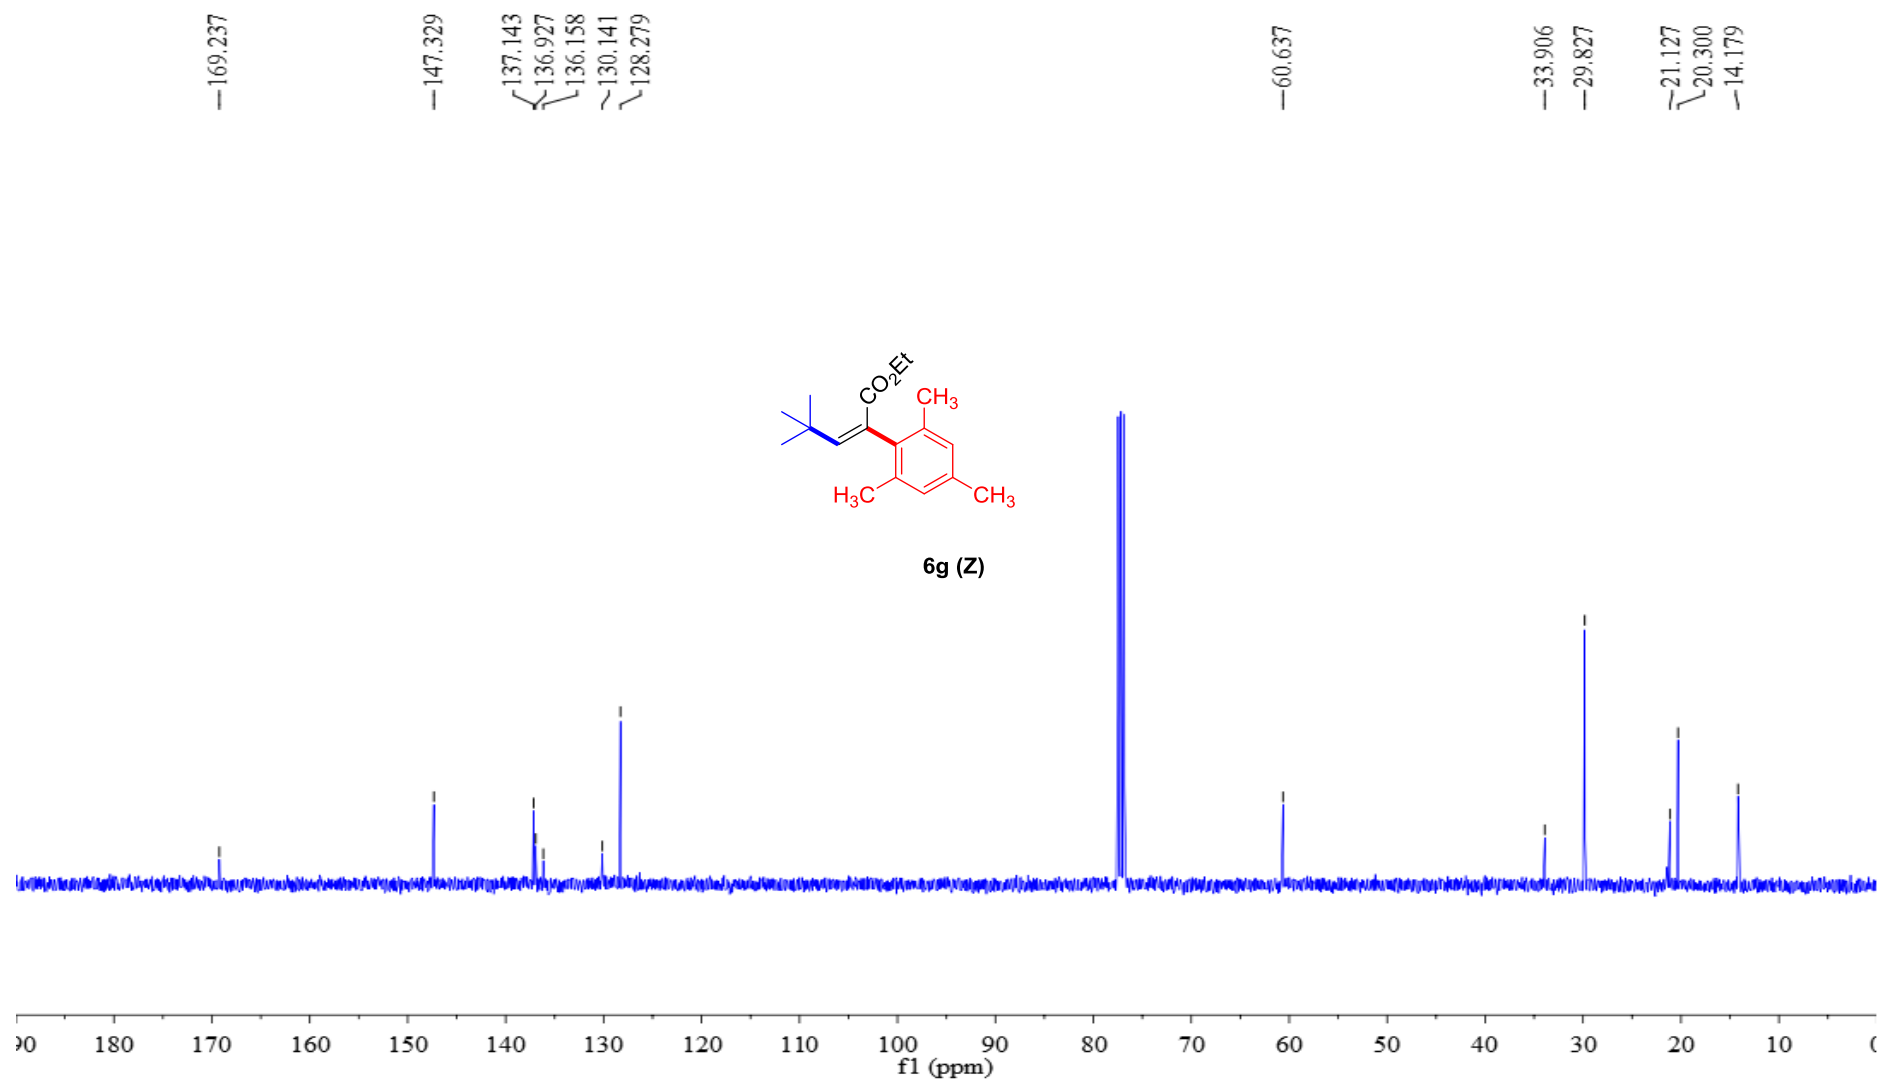

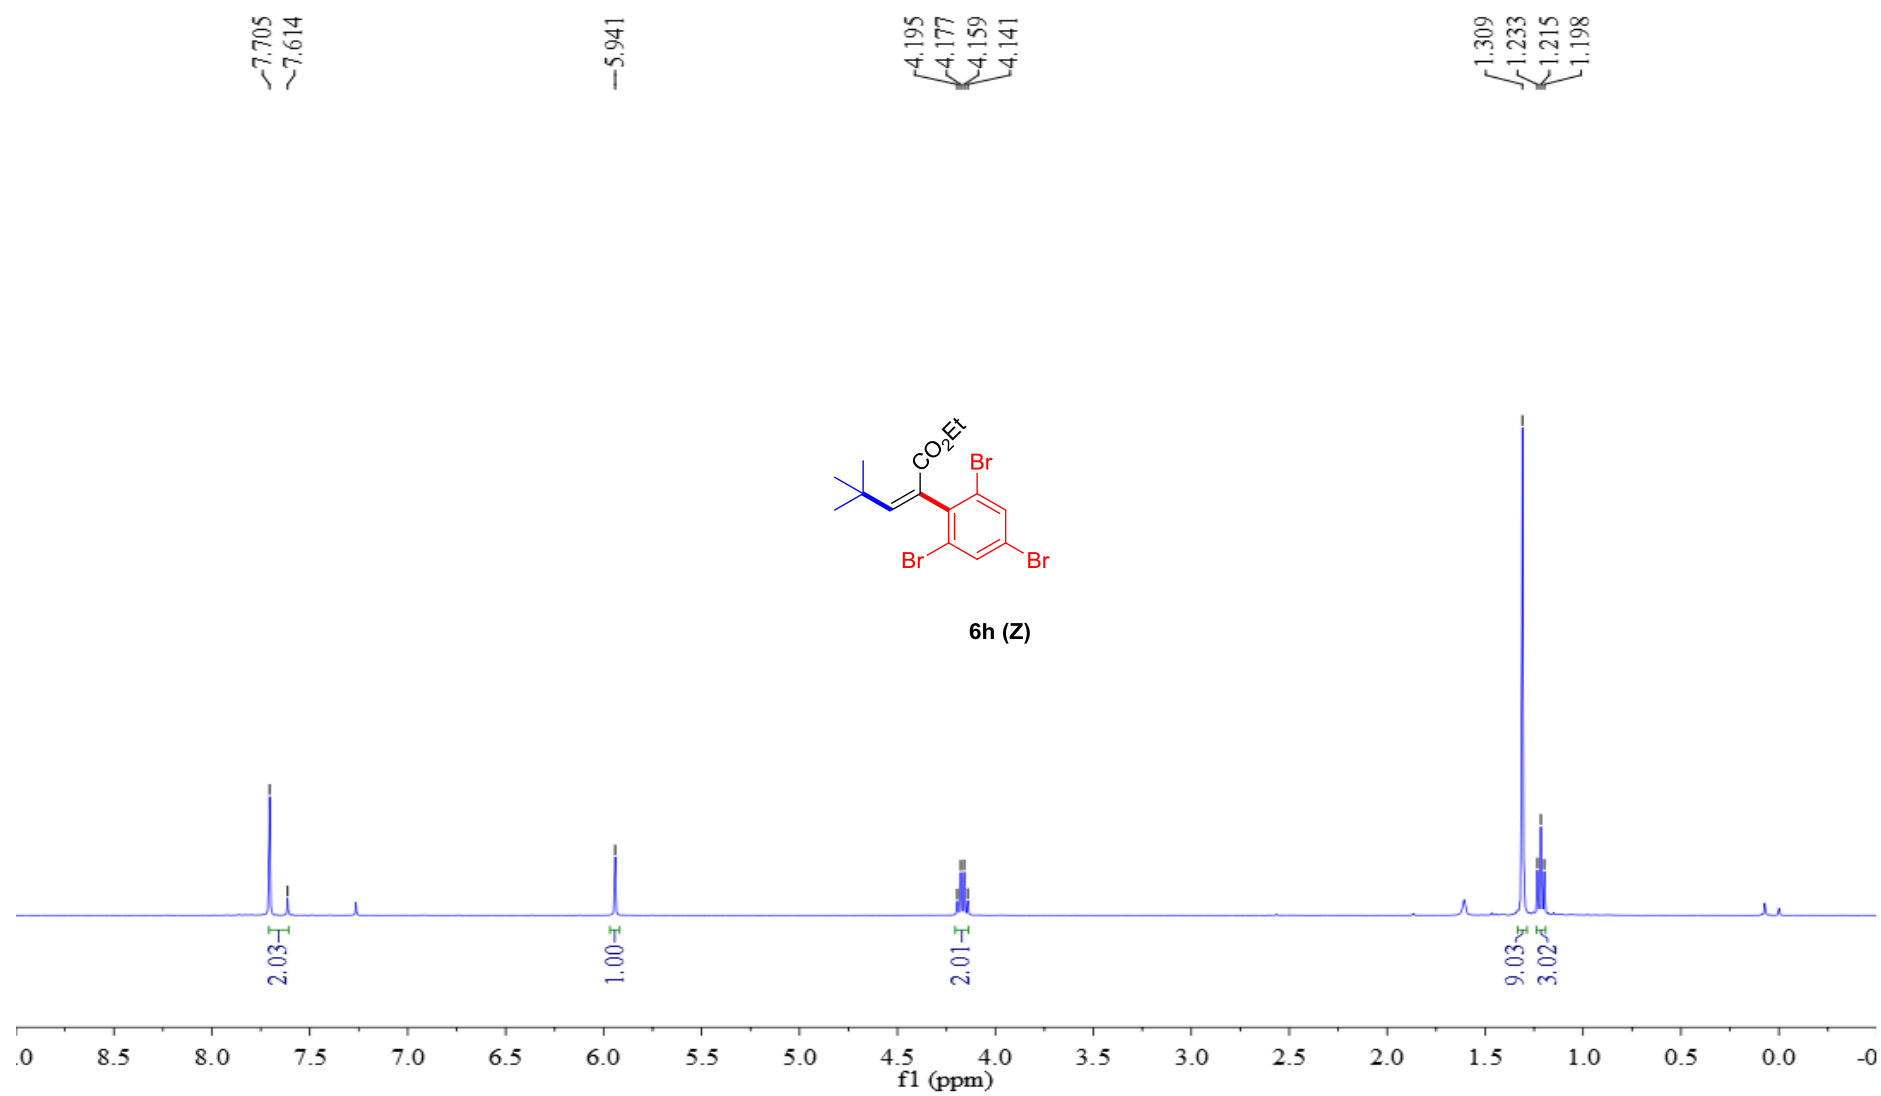

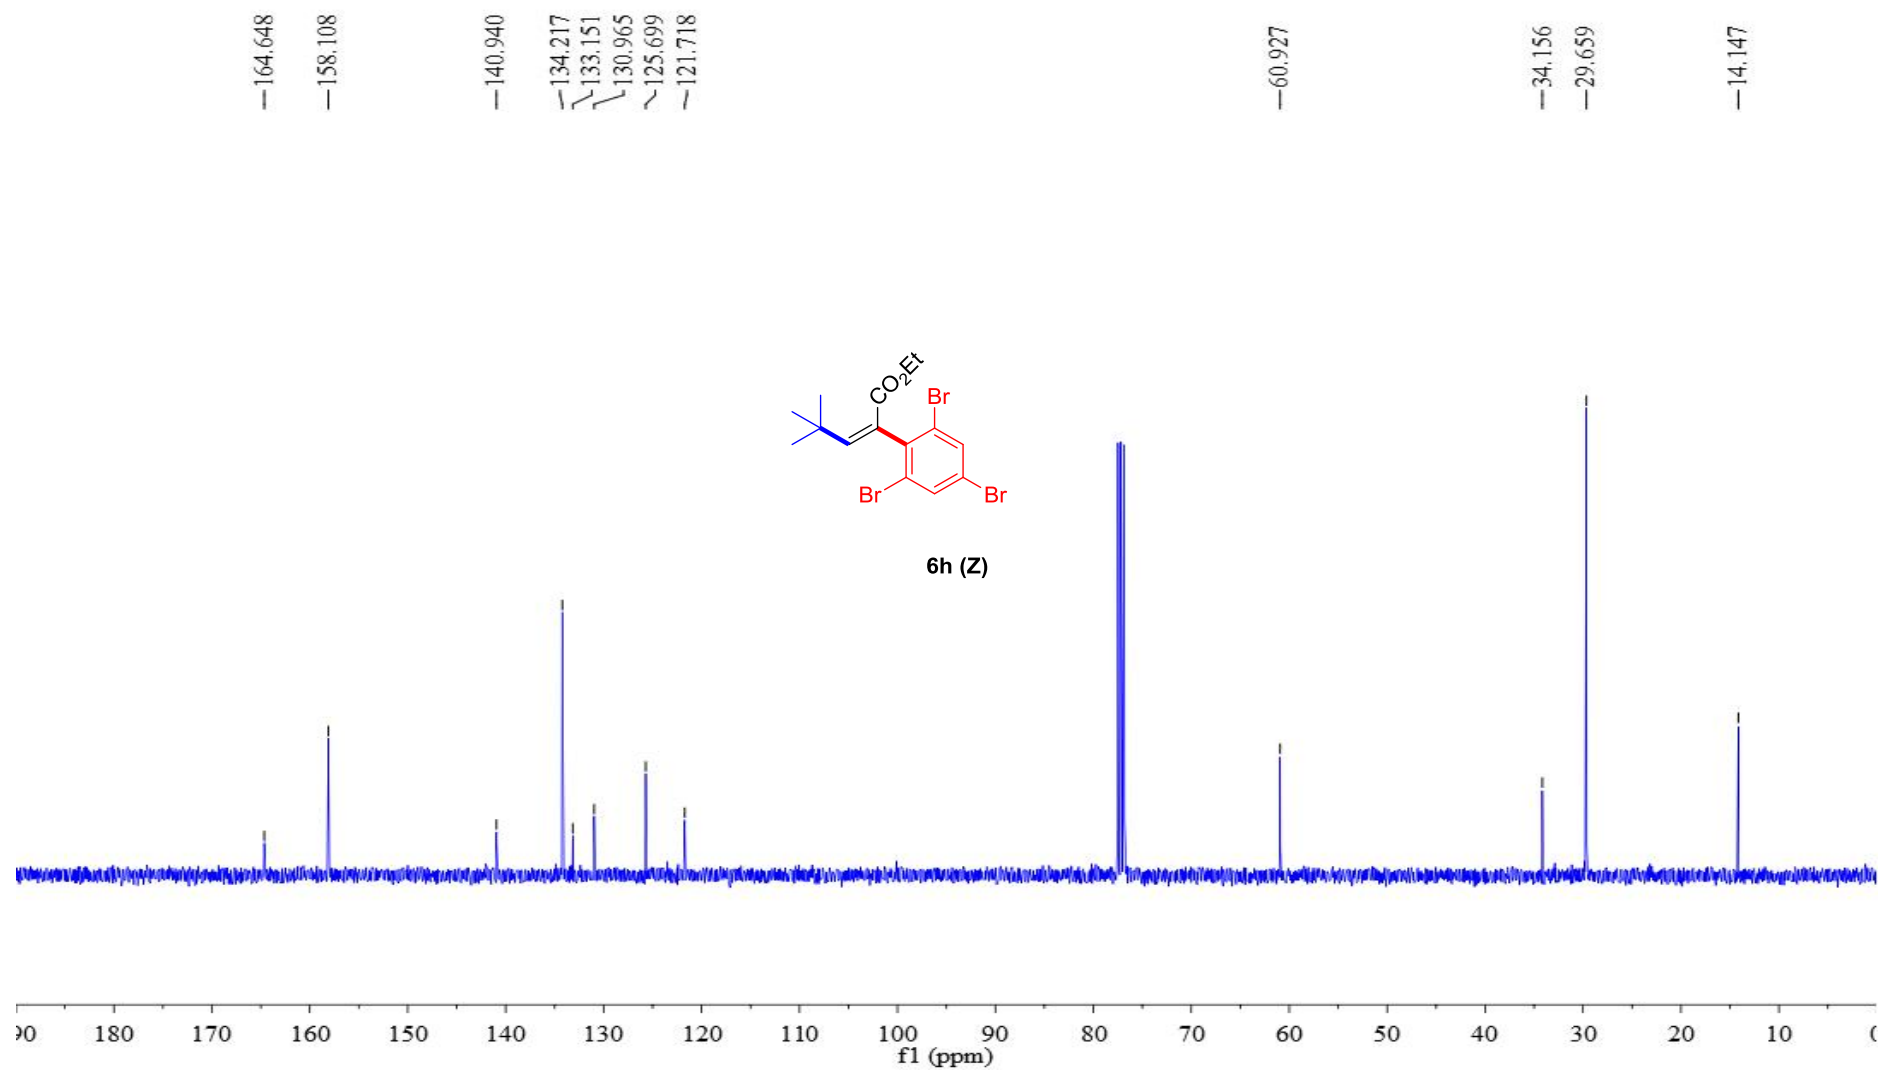

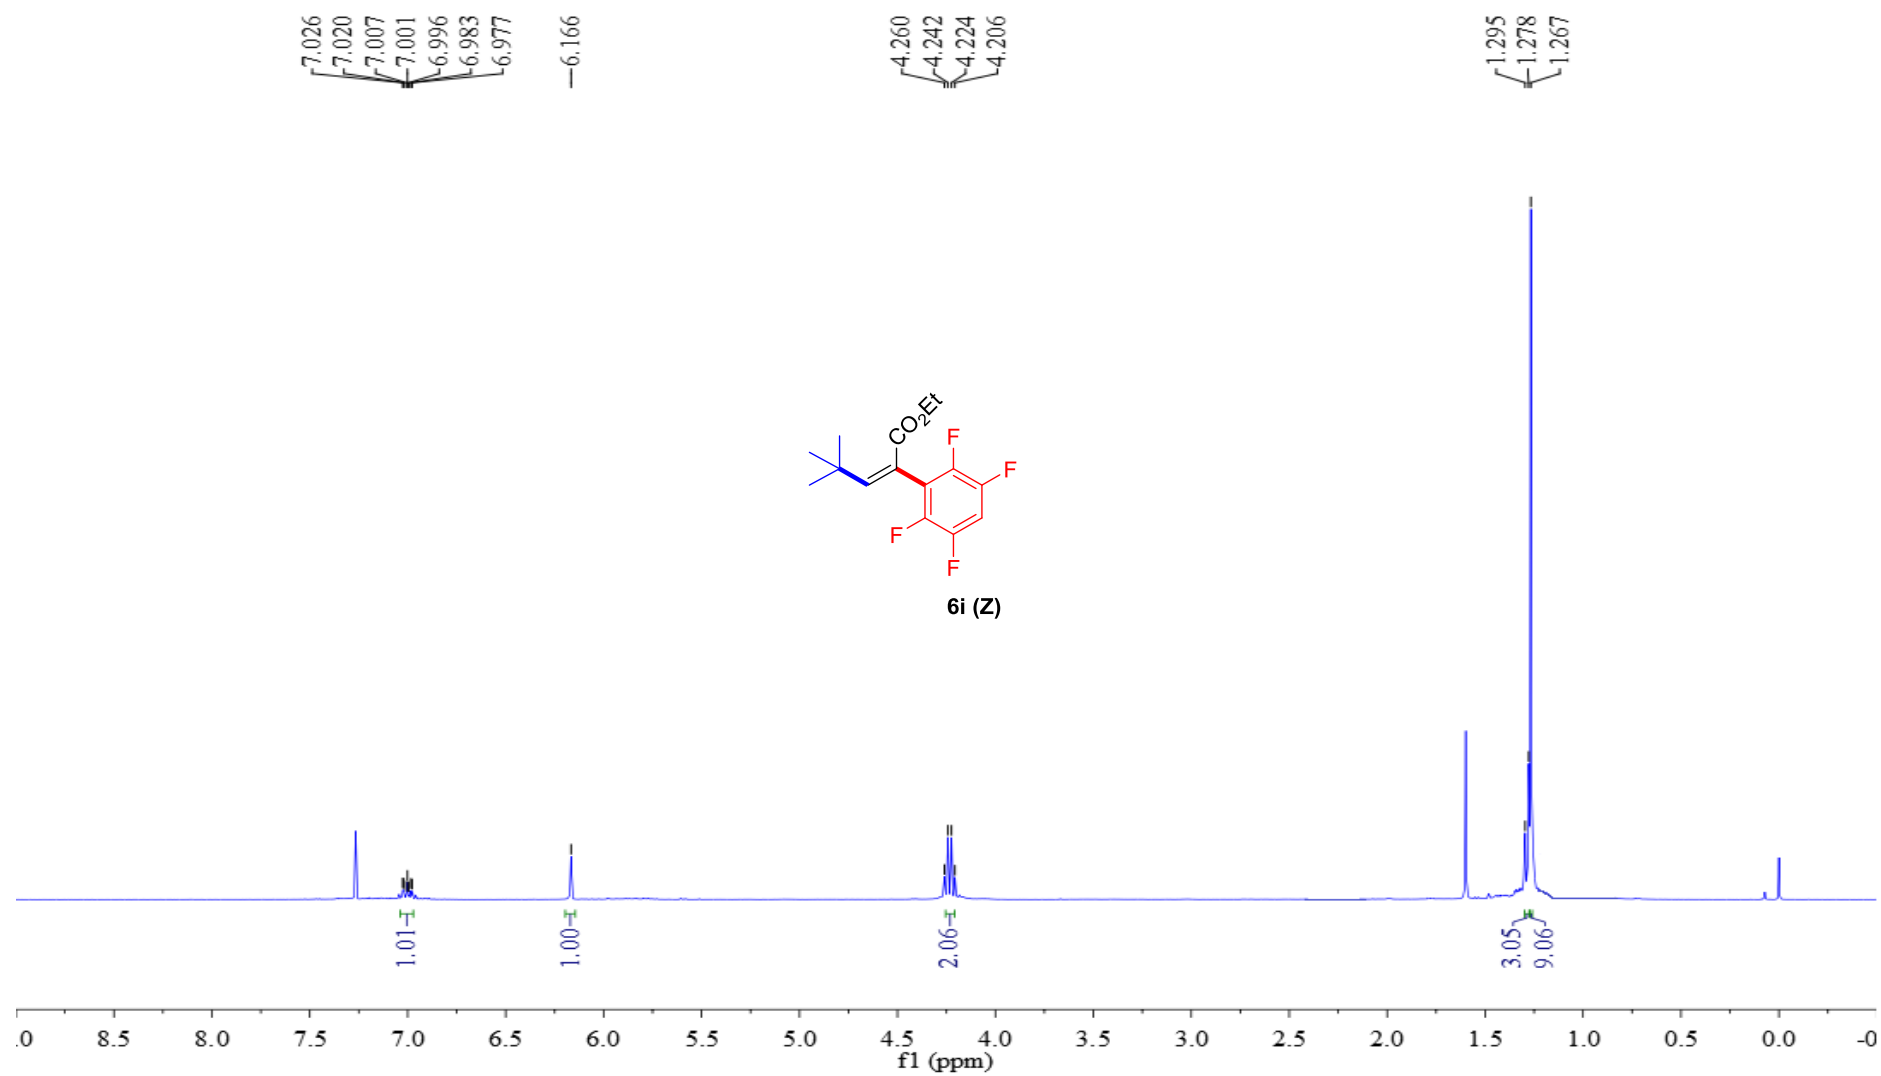



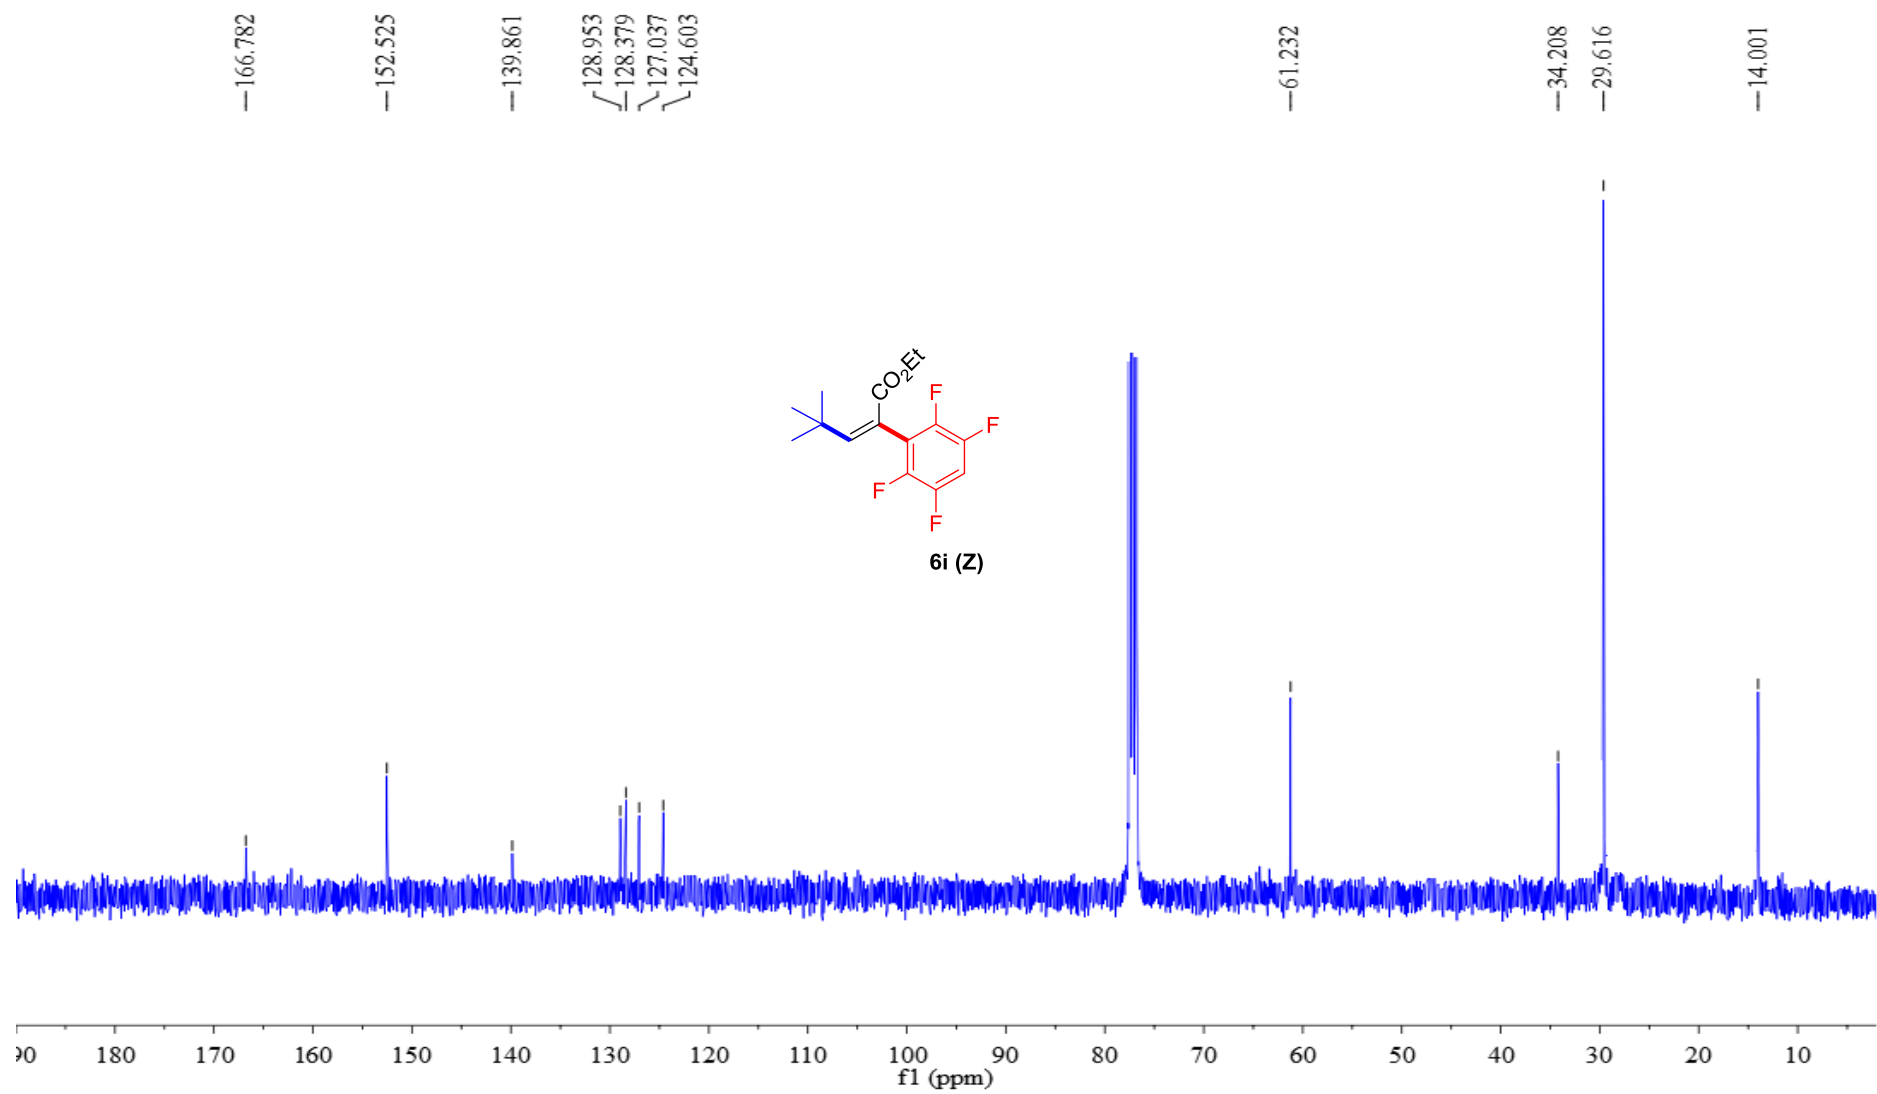

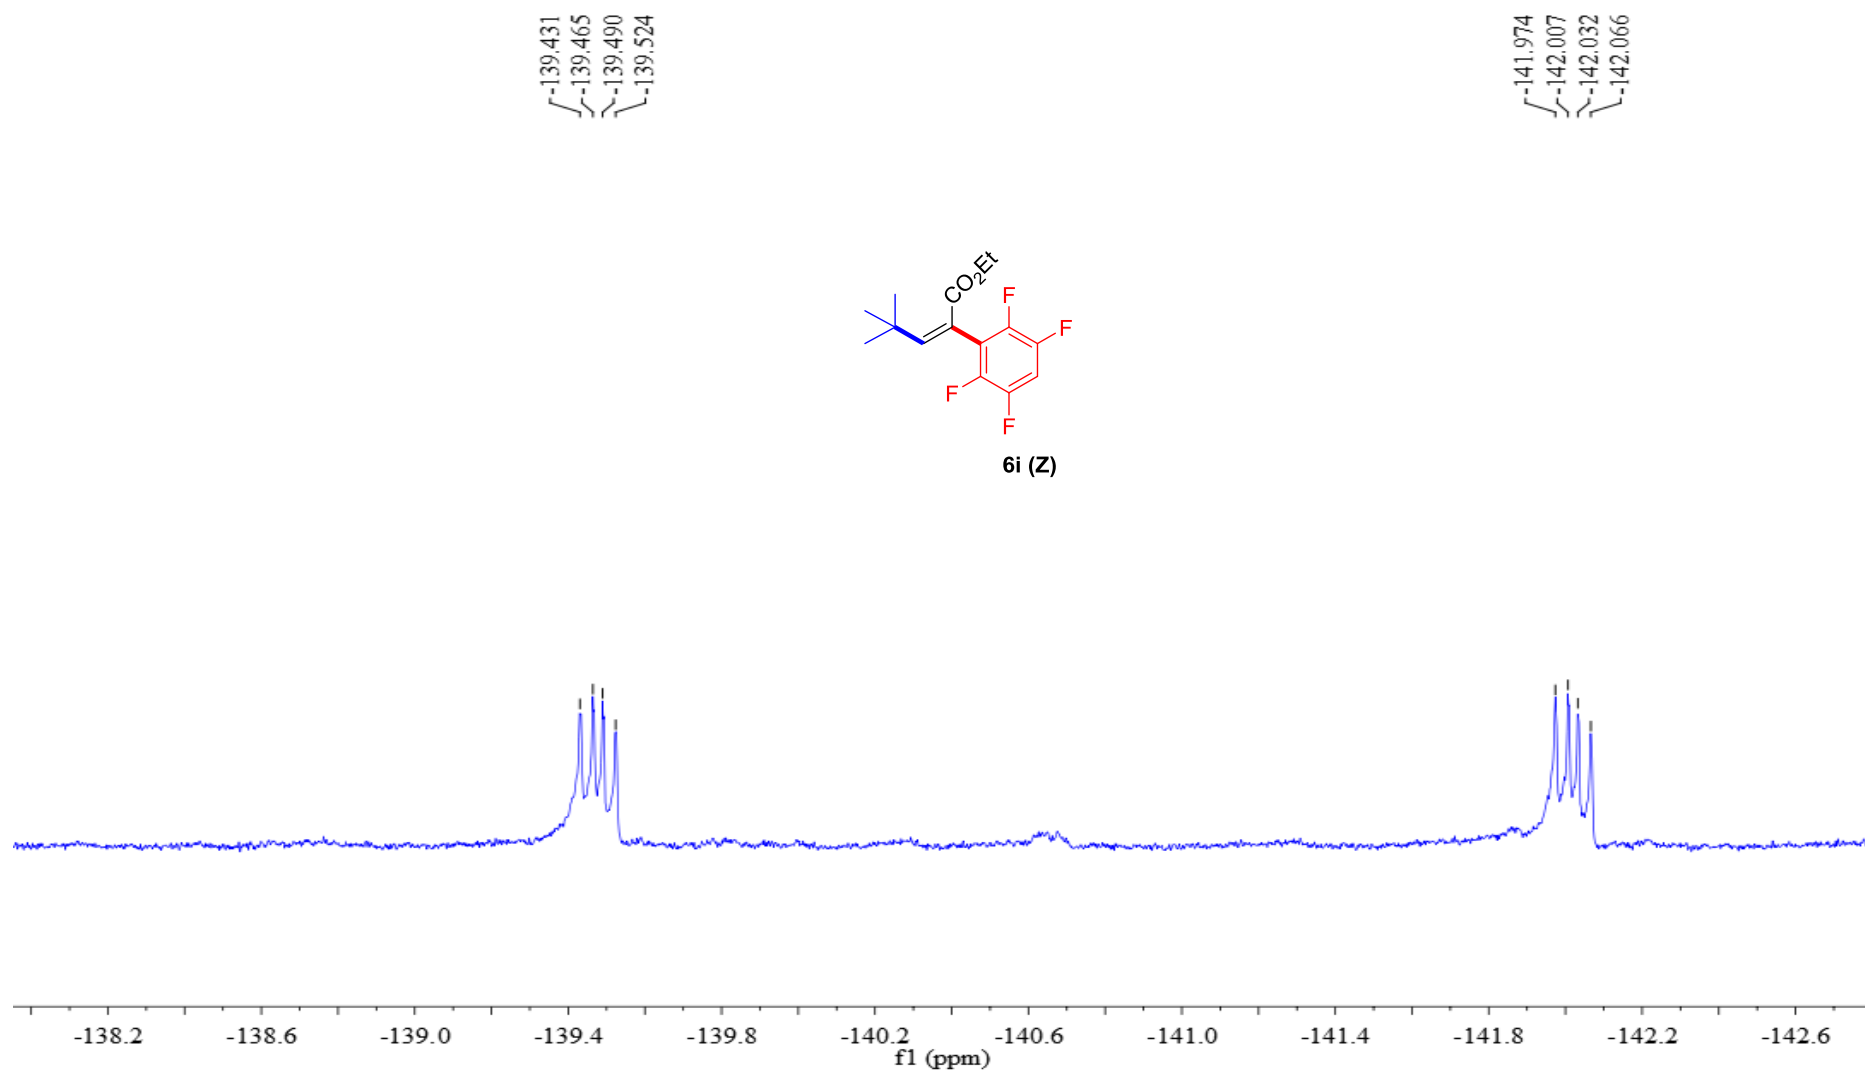

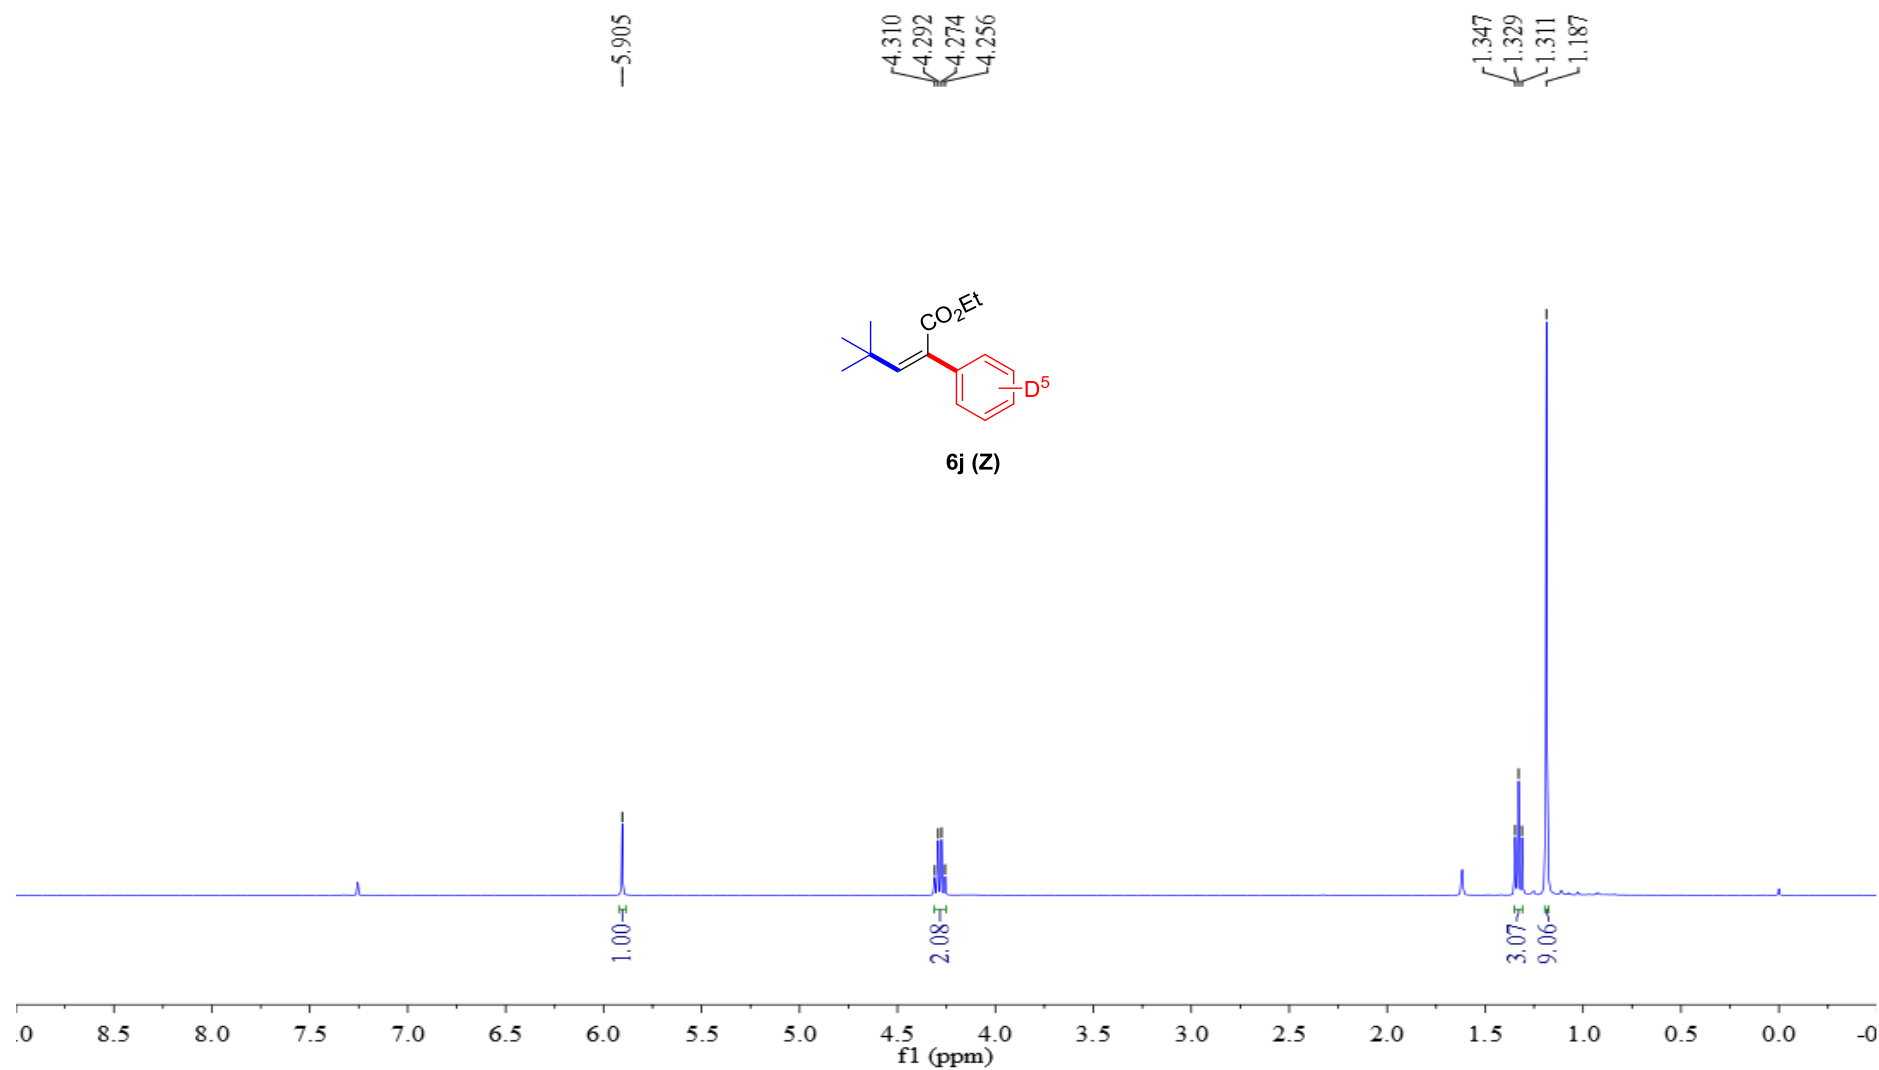

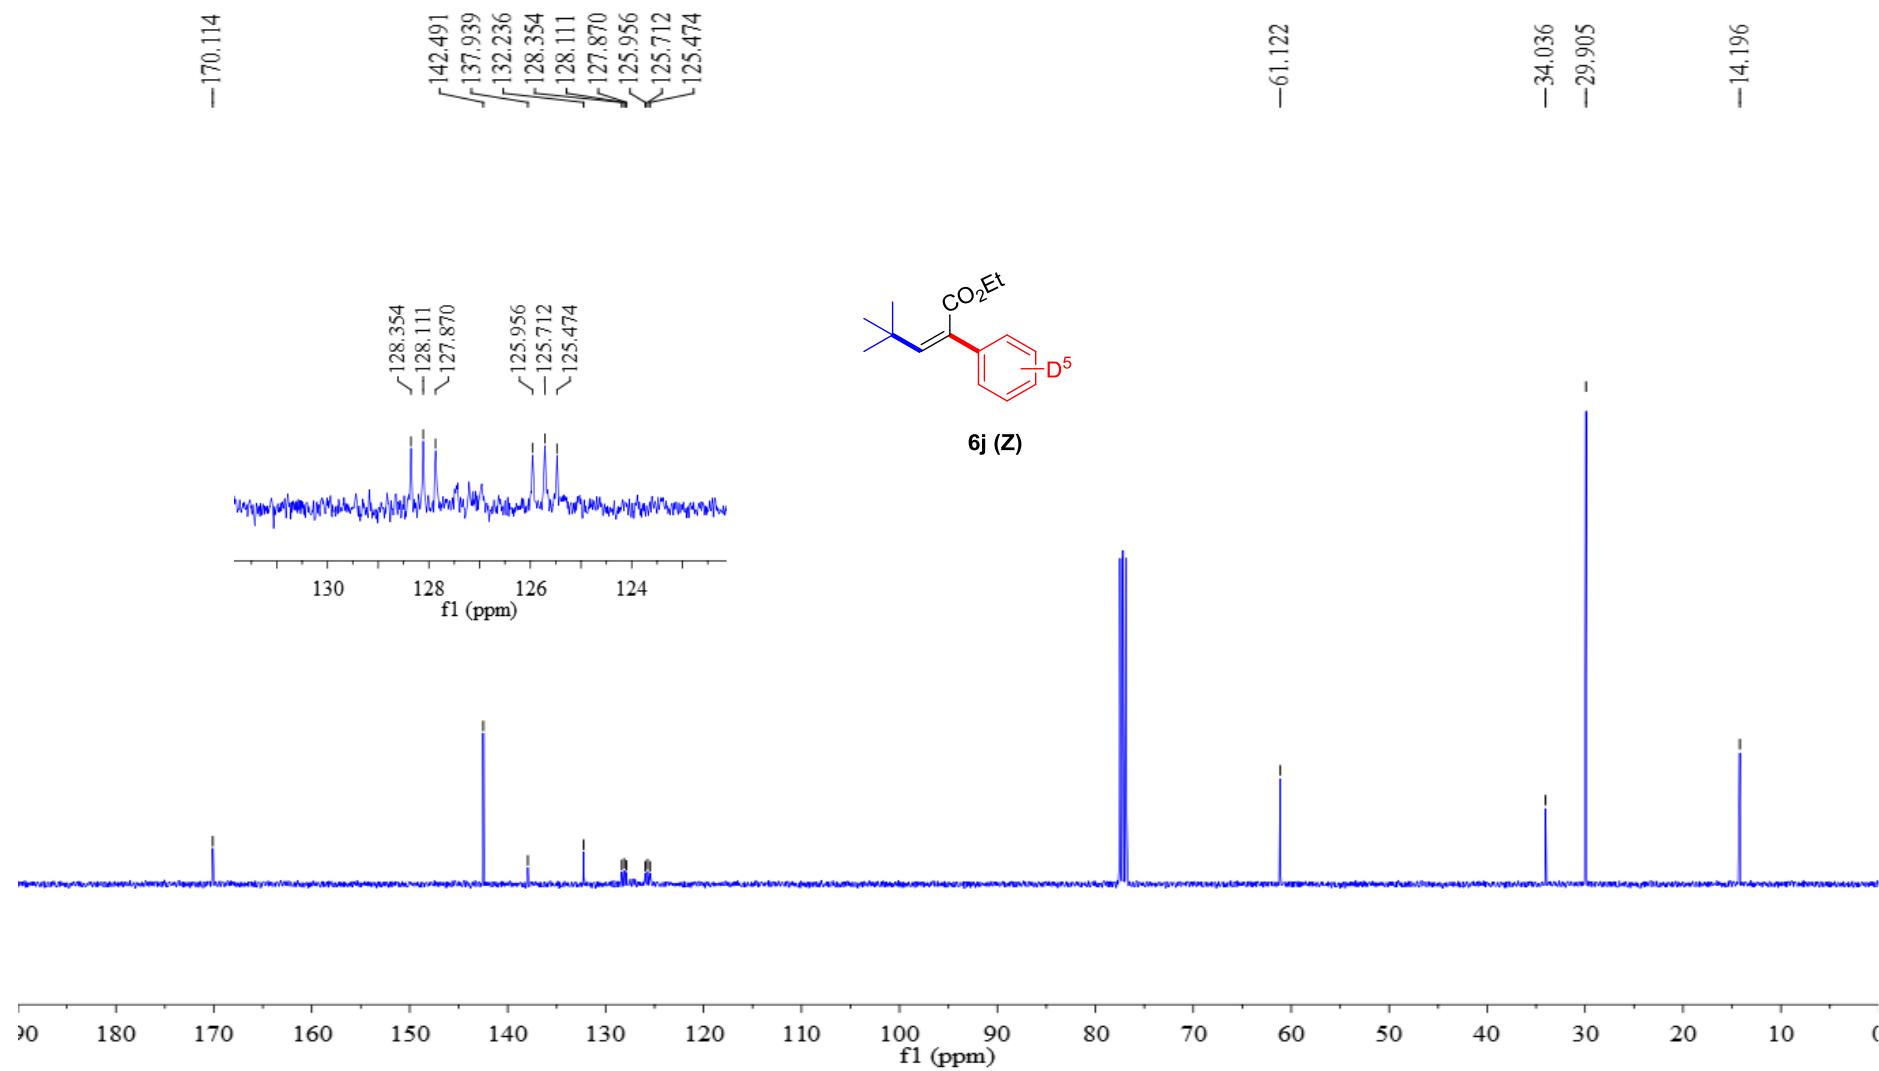

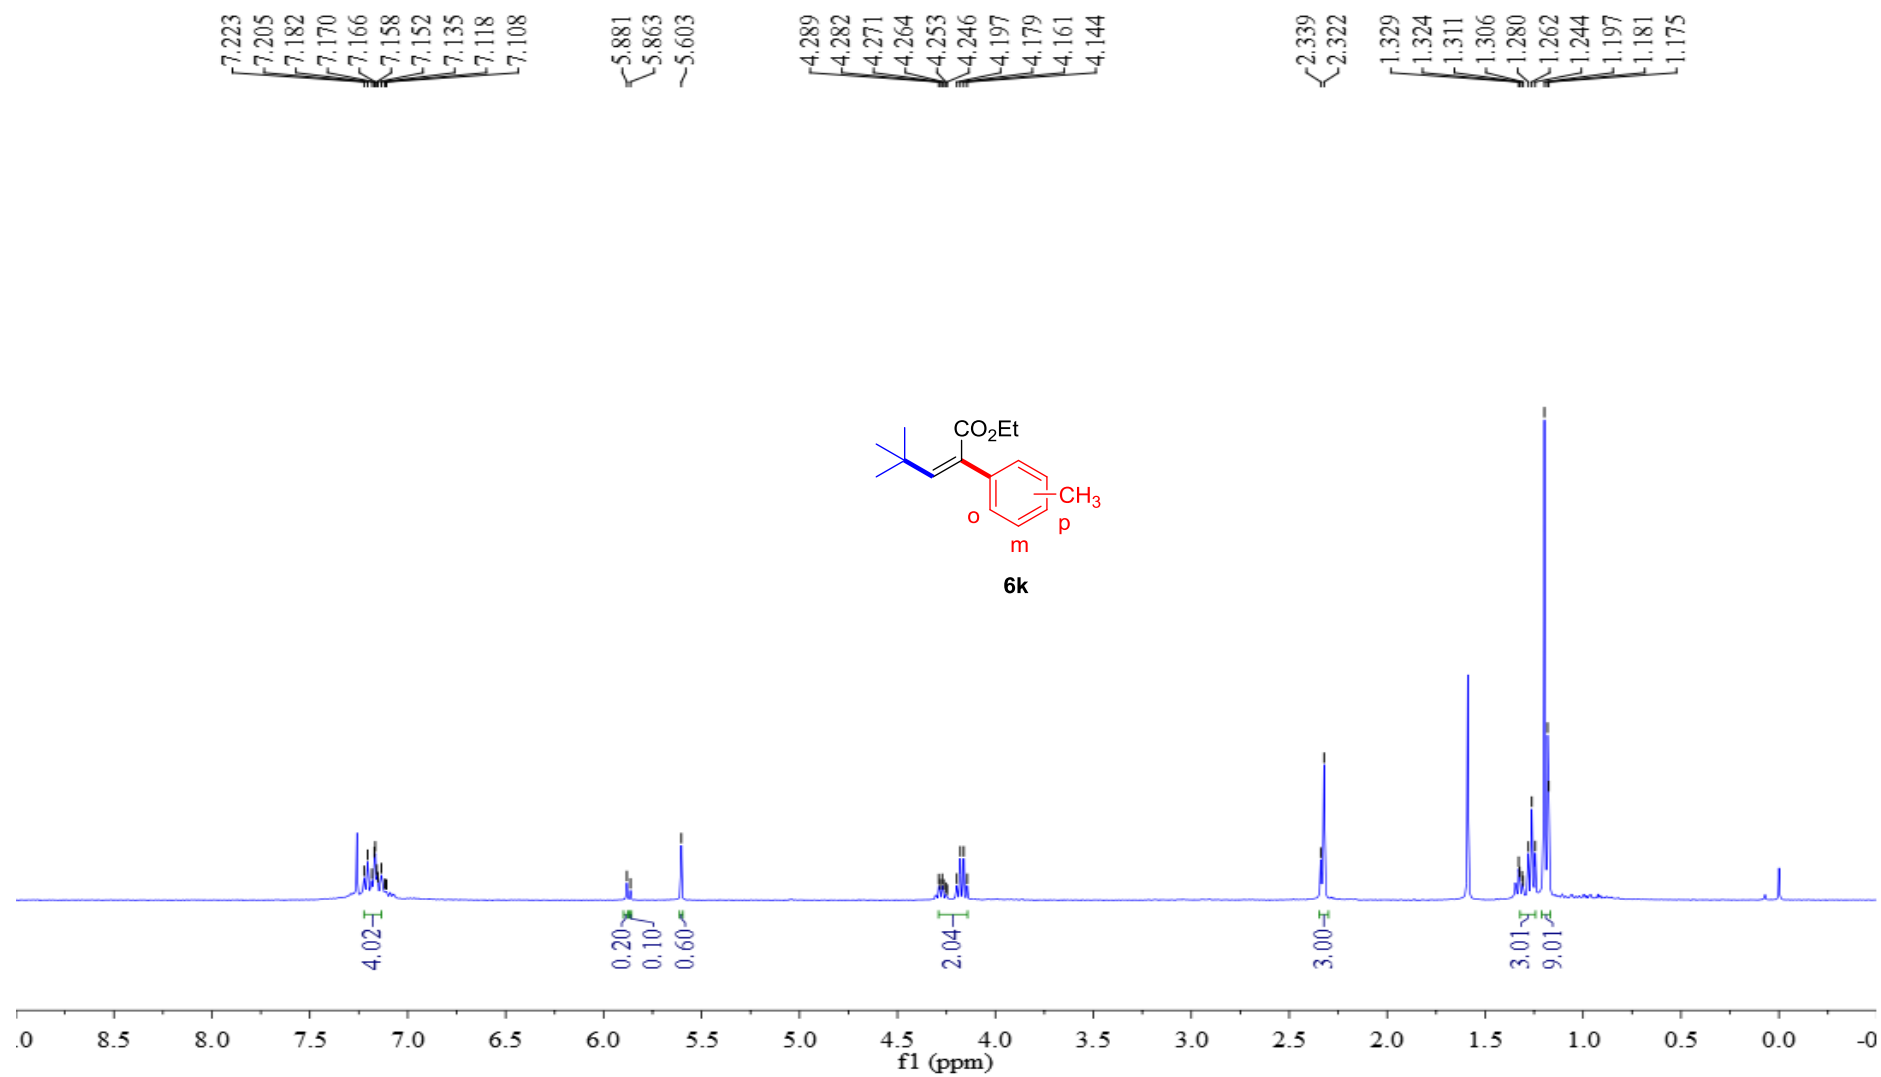

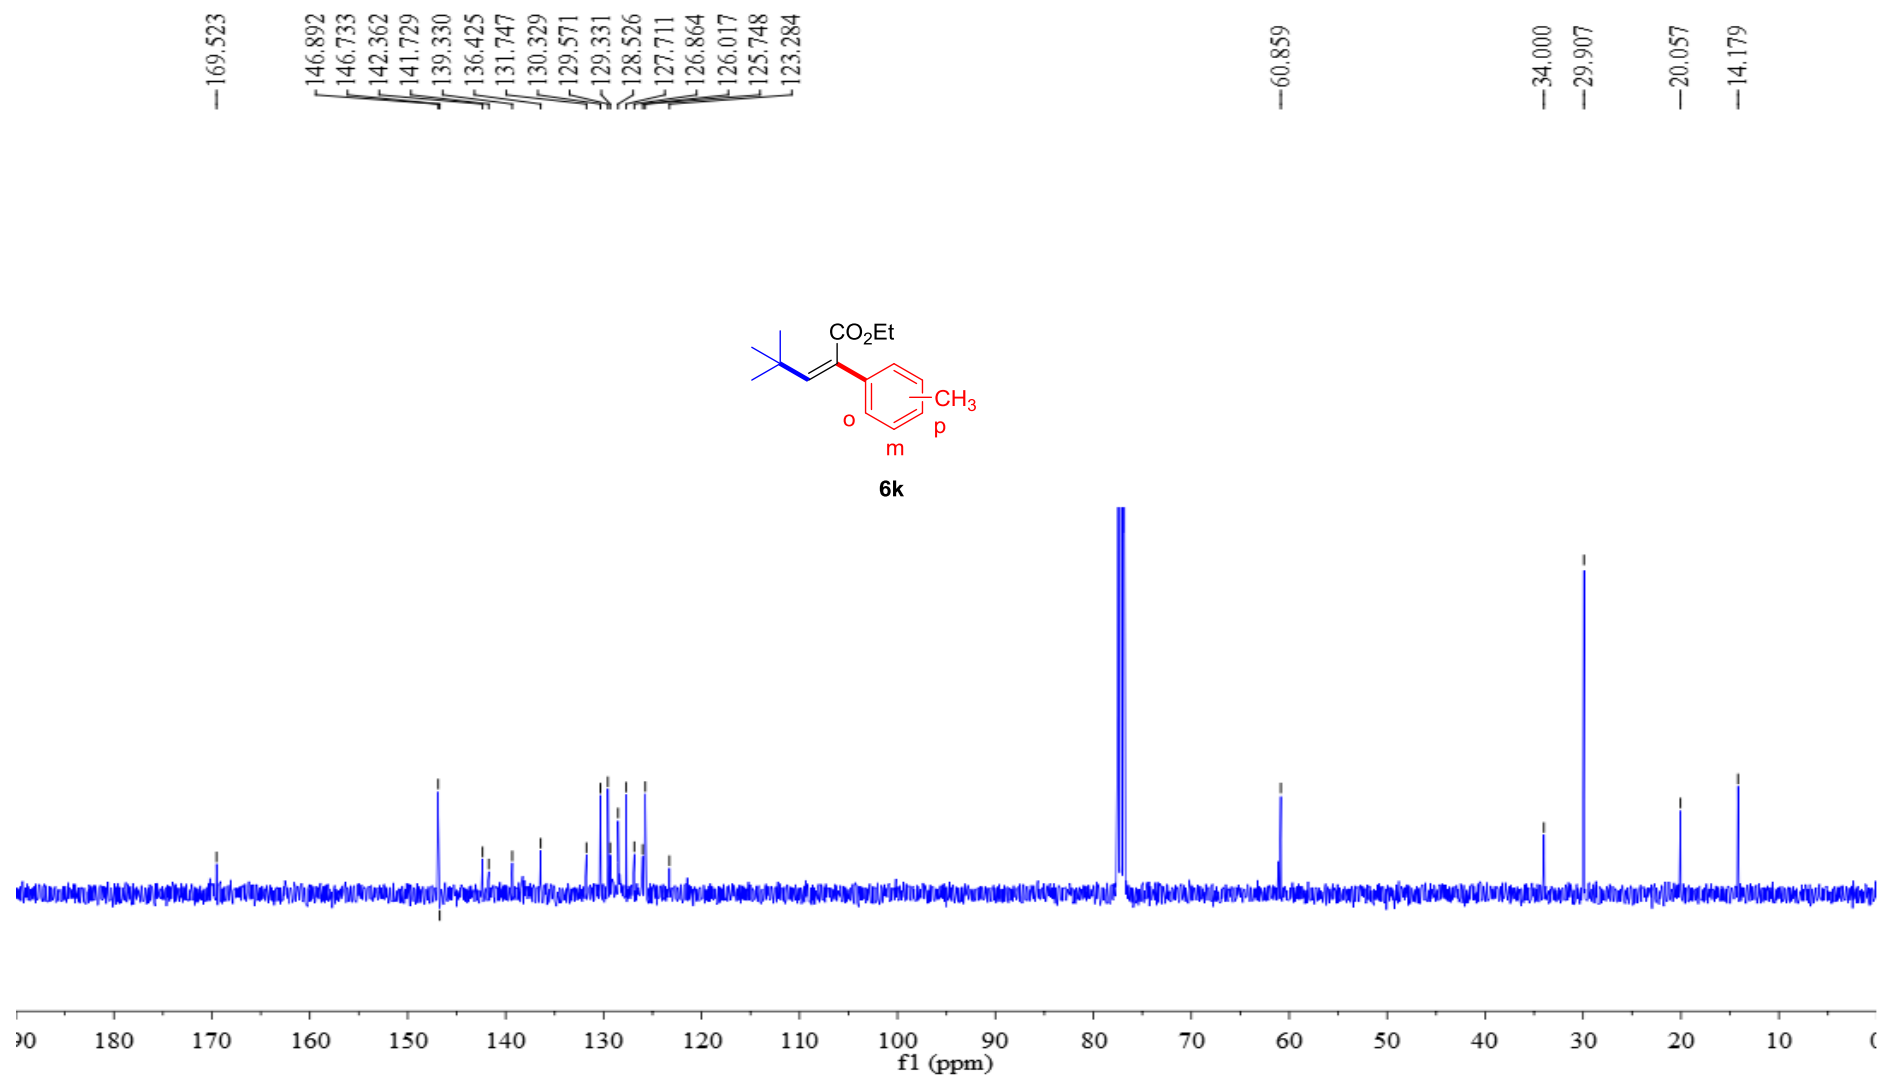

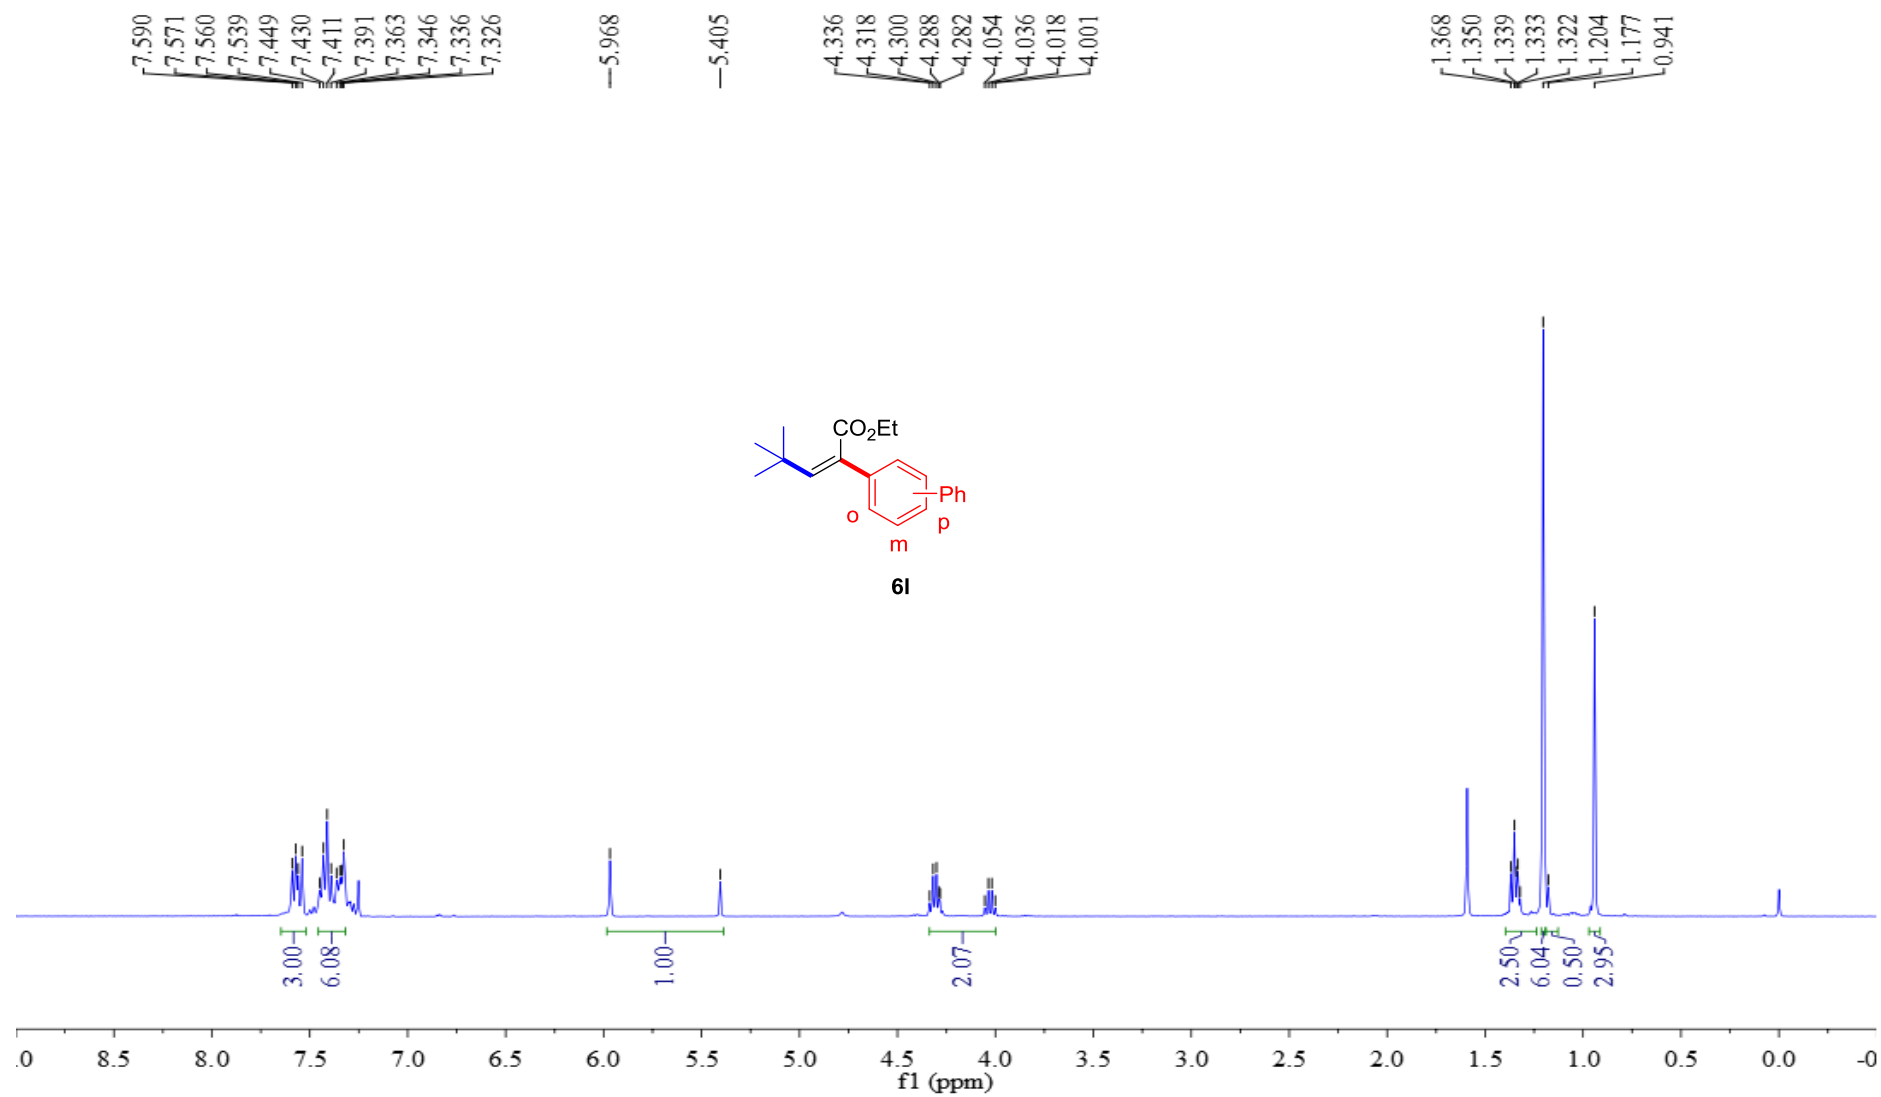

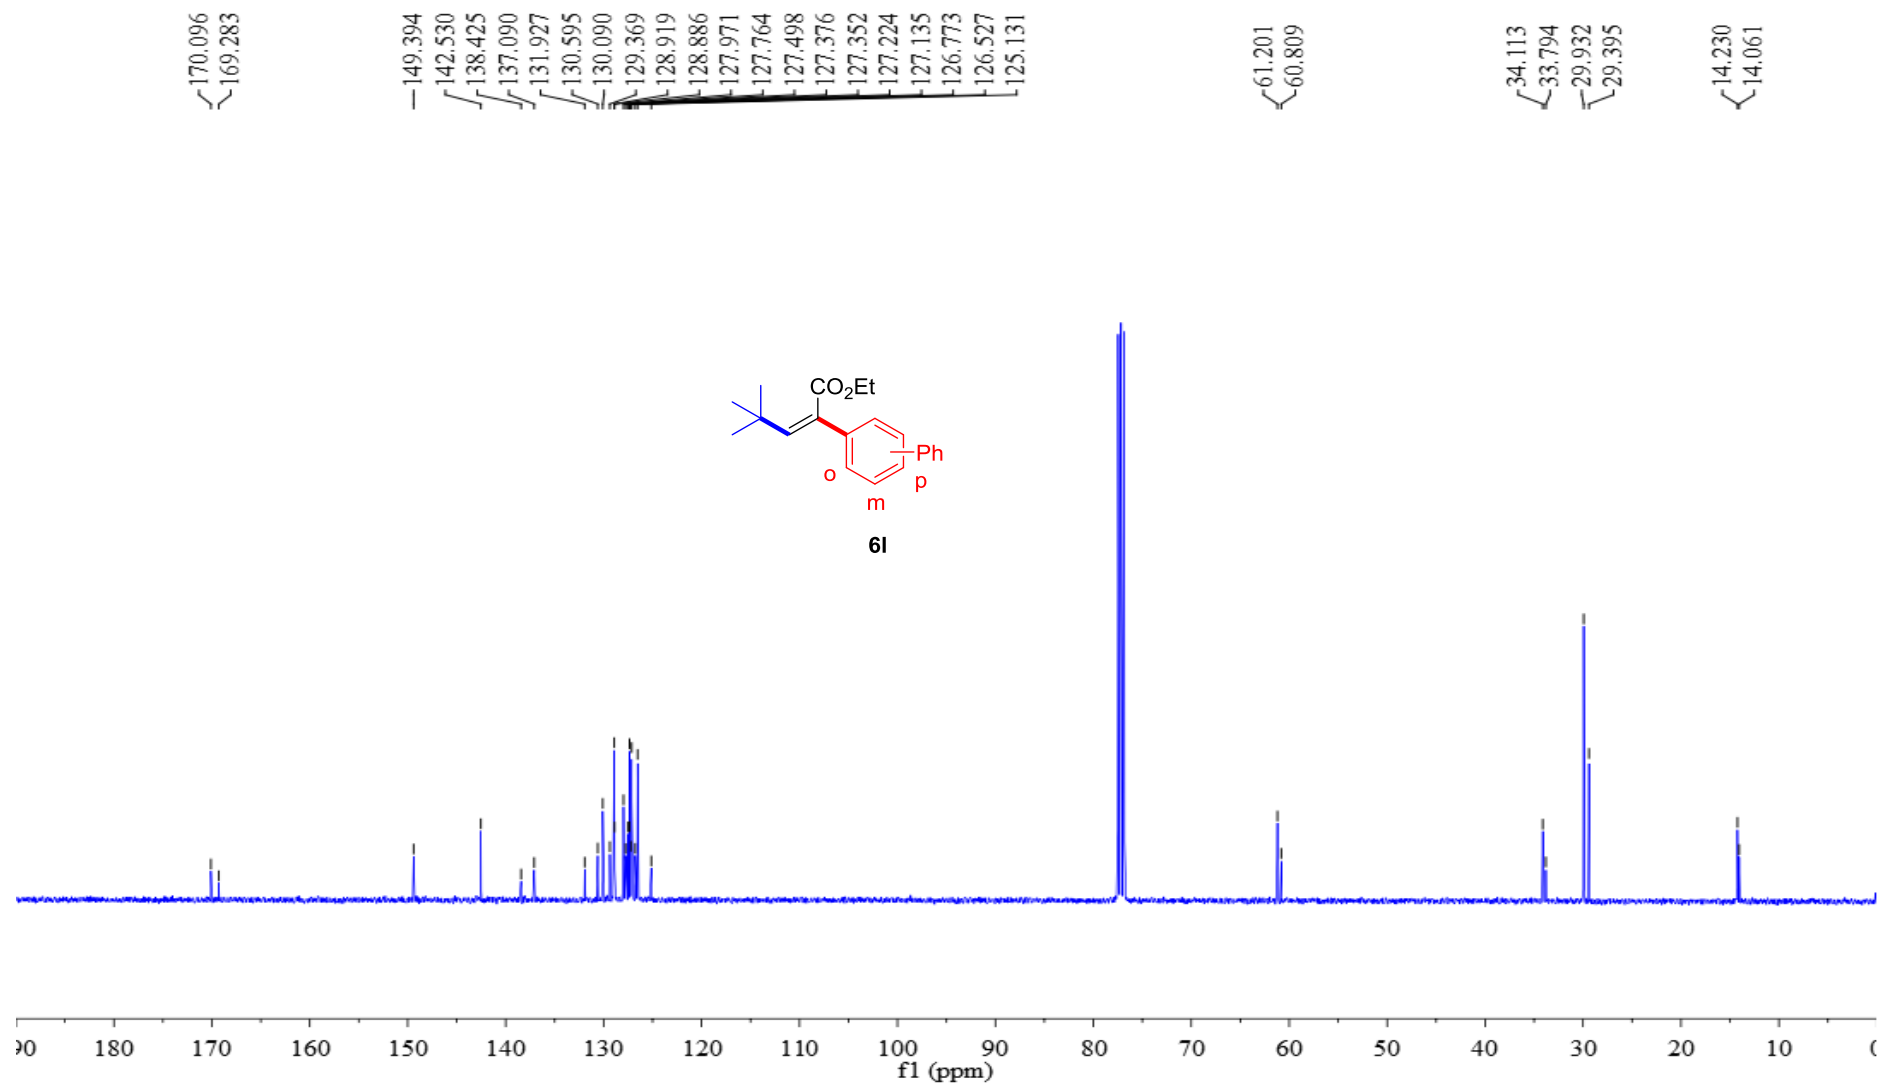



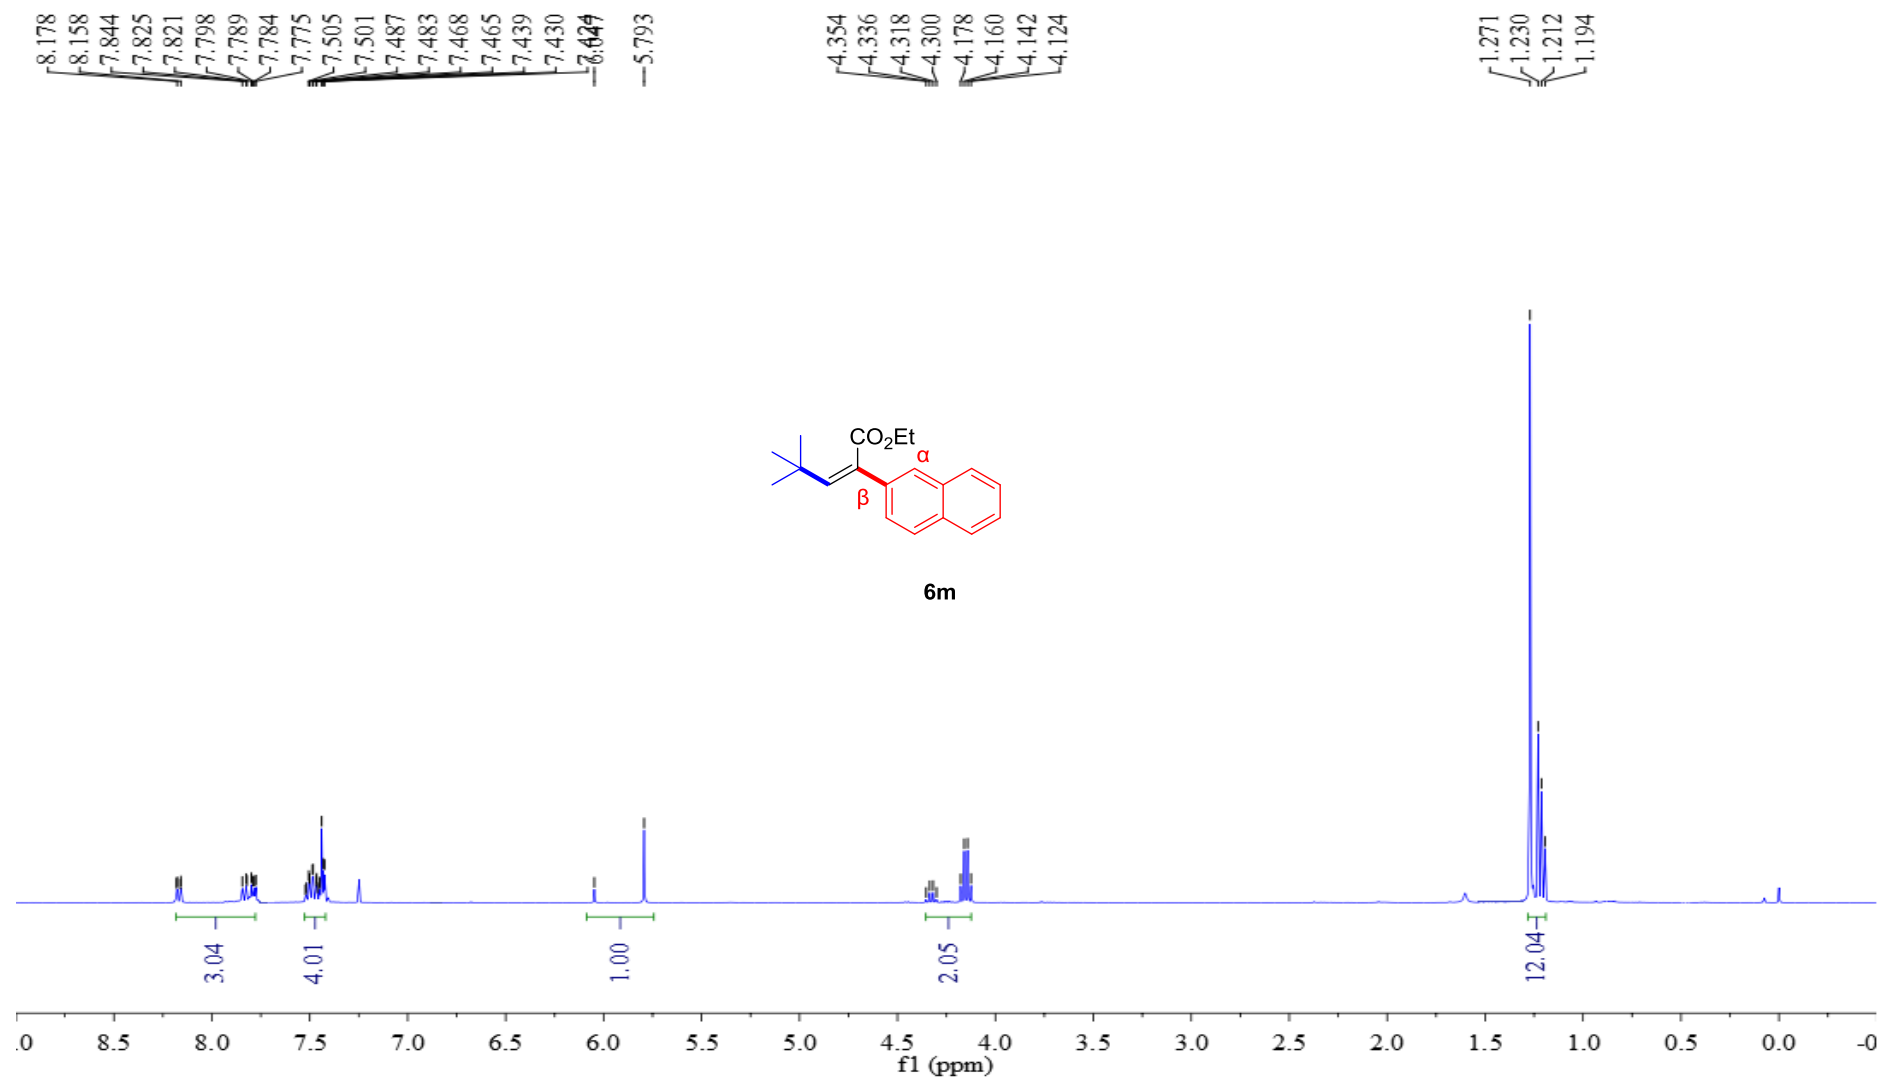

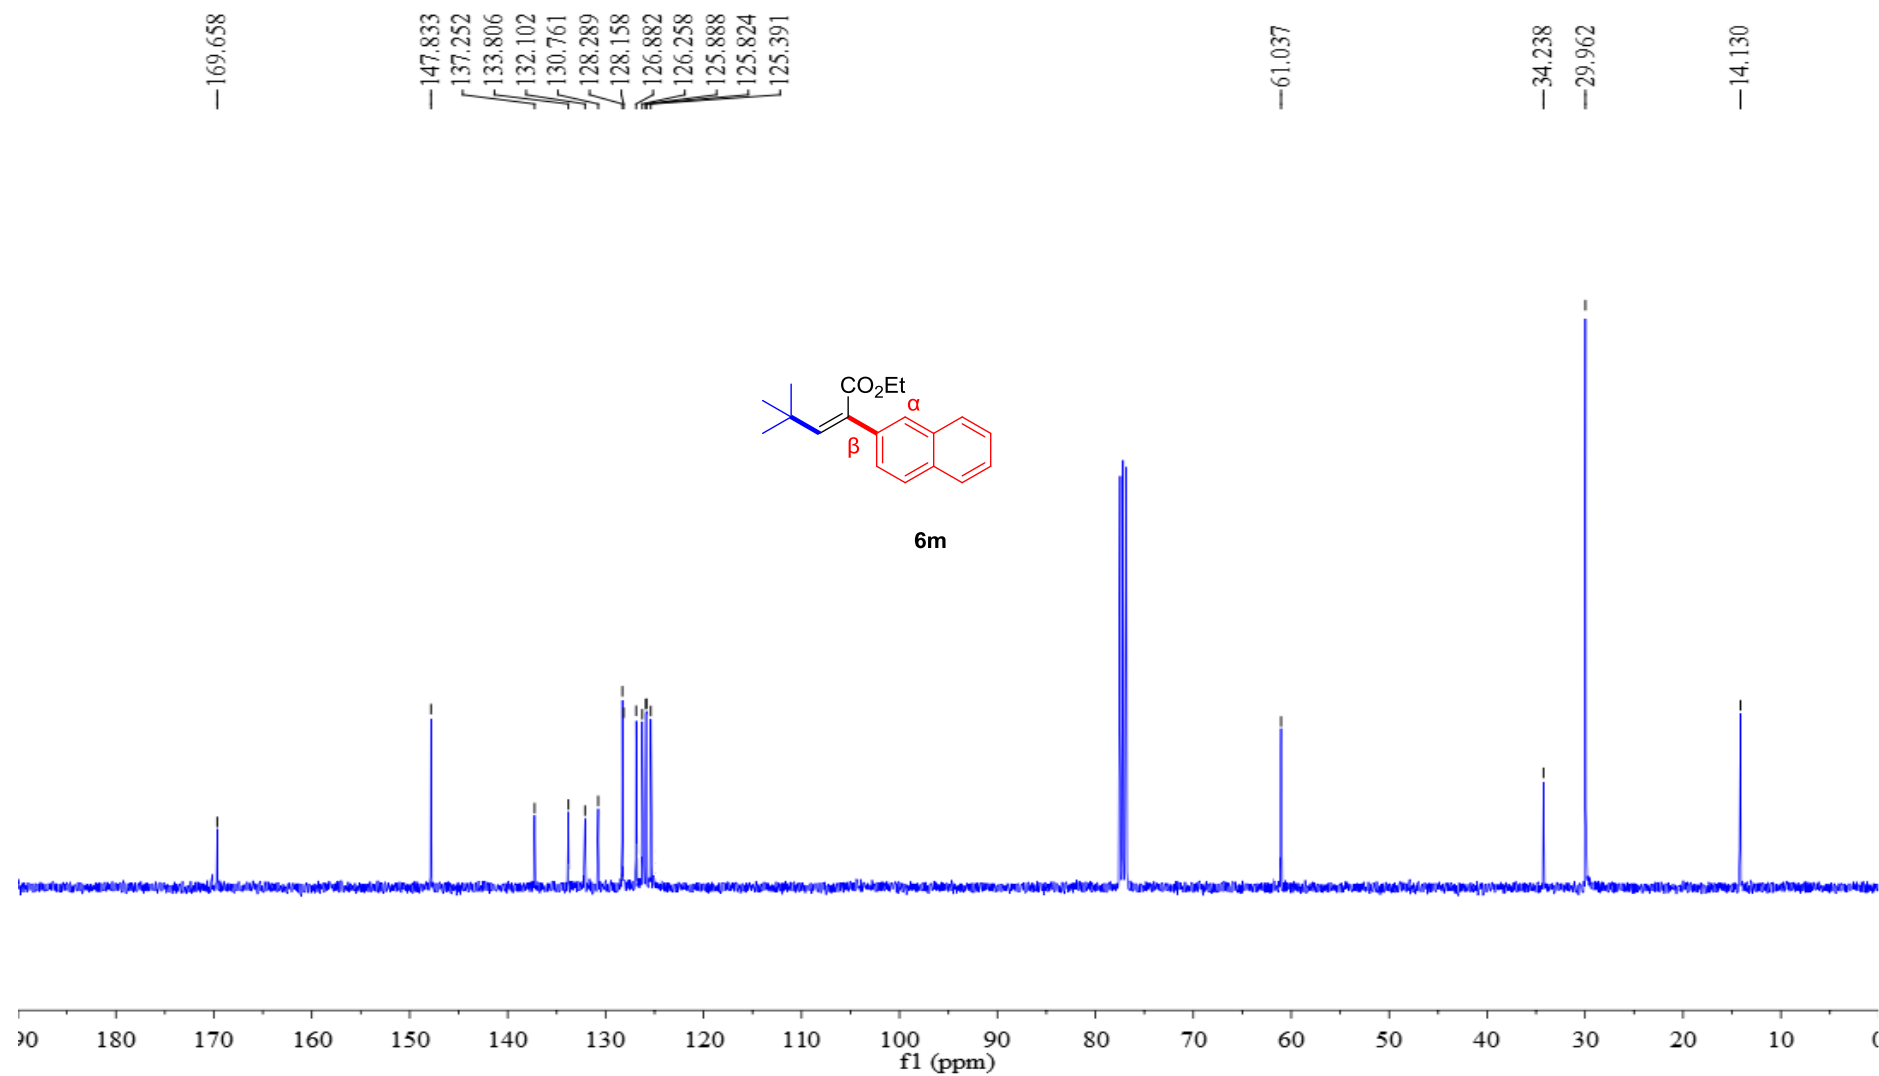

Supplement: c9qo01009b1.pdf [file c9qo01009b1.pdf]
