# Supplementary material for: Regio- and stereo-selective decarbonylative alkylative arylation of terminal alkynes with aliphatic aldehydes and arenes via dual C–H bond functionalization
Source: Royal Society of Chemistry journal article supplement (doi:10.1039/c9qo01009b), 2019-01-01
Supplement: c9qo01009b2.log [file c9qo01009b2.log]

 Entering Link 1 = C:\G03W\l1.exe PID=     18228.
  
 Copyright (c) 1988,1990,1992,1993,1995,1998,2003, Gaussian, Inc.
                  All Rights Reserved.
  
 This is the Gaussian(R) 03 program.  It is based on the
 the Gaussian(R) 98 system (copyright 1998, Gaussian, Inc.),
 the Gaussian(R) 94 system (copyright 1995, Gaussian, Inc.),
 the Gaussian 92(TM) system (copyright 1992, Gaussian, Inc.),
 the Gaussian 90(TM) system (copyright 1990, Gaussian, Inc.),
 the Gaussian 88(TM) system (copyright 1988, Gaussian, Inc.),
 the Gaussian 86(TM) system (copyright 1986, Carnegie Mellon
 University), and the Gaussian 82(TM) system (copyright 1983,
 Carnegie Mellon University). Gaussian is a federally registered
 trademark of Gaussian, Inc.
  
 This software contains proprietary and confidential information,
 including trade secrets, belonging to Gaussian, Inc.
  
 This software is provided under written license and may be
 used, copied, transmitted, or stored only in accord with that
 written license.
  
 The following legend is applicable only to US Government
 contracts under DFARS:
  
                    RESTRICTED RIGHTS LEGEND
  
 Use, duplication or disclosure by the US Government is subject
 to restrictions as set forth in subparagraph (c)(1)(ii) of the
 Rights in Technical Data and Computer Software clause at DFARS
 252.227-7013.
  
 Gaussian, Inc.
 Carnegie Office Park, Building 6, Pittsburgh, PA 15106 USA
  
 The following legend is applicable only to US Government
 contracts under FAR:
  
                    RESTRICTED RIGHTS LEGEND
  
 Use, reproduction and disclosure by the US Government is subject
 to restrictions as set forth in subparagraph (c) of the
 Commercial Computer Software - Restricted Rights clause at FAR
 52.227-19.
  
 Gaussian, Inc.
 Carnegie Office Park, Building 6, Pittsburgh, PA 15106 USA
  
  
 ---------------------------------------------------------------
 Warning -- This program may not be used in any manner that
 competes with the business of Gaussian, Inc. or will provide
 assistance to any competitor of Gaussian, Inc.  The licensee
 of this program is prohibited from giving any competitor of
 Gaussian, Inc. access to this program.  By using this program,
 the user acknowledges that Gaussian, Inc. is engaged in the
 business of creating and licensing software in the field of
 computational chemistry and represents and warrants to the
 licensee that it is not a competitor of Gaussian, Inc. and that
 it will not use this program in any manner prohibited above.
 ---------------------------------------------------------------
  

 Cite this work as:
 Gaussian 03, Revision B.05,
 M. J. Frisch, G. W. Trucks, H. B. Schlegel, G. E. Scuseria, 
 M. A. Robb, J. R. Cheeseman, J. A. Montgomery, Jr., T. Vreven, 
 K. N. Kudin, J. C. Burant, J. M. Millam, S. S. Iyengar, J. Tomasi, 
 V. Barone, B. Mennucci, M. Cossi, G. Scalmani, N. Rega, 
 G. A. Petersson, H. Nakatsuji, M. Hada, M. Ehara, K. Toyota, 
 R. Fukuda, J. Hasegawa, M. Ishida, T. Nakajima, Y. Honda, O. Kitao, 
 H. Nakai, M. Klene, X. Li, J. E. Knox, H. P. Hratchian, J. B. Cross, 
 C. Adamo, J. Jaramillo, R. Gomperts, R. E. Stratmann, O. Yazyev, 
 A. J. Austin, R. Cammi, C. Pomelli, J. W. Ochterski, P. Y. Ayala, 
 K. Morokuma, G. A. Voth, P. Salvador, J. J. Dannenberg, 
 V. G. Zakrzewski, S. Dapprich, A. D. Daniels, M. C. Strain, 
 O. Farkas, D. K. Malick, A. D. Rabuck, K. Raghavachari, 
 J. B. Foresman, J. V. Ortiz, Q. Cui, A. G. Baboul, S. Clifford, 
 J. Cioslowski, B. B. Stefanov, G. Liu, A. Liashenko, P. Piskorz, 
 I. Komaromi, R. L. Martin, D. J. Fox, T. Keith, M. A. Al-Laham, 
 C. Y. Peng, A. Nanayakkara, M. Challacombe, P. M. W. Gill, 
 B. Johnson, W. Chen, M. W. Wong, C. Gonzalez, and J. A. Pople, 
 Gaussian, Inc., Pittsburgh PA, 2003.
 
 **********************************************
 Gaussian 03:  x86-Win32-G03RevB.05  8-Nov-2003
                  14-Jul-2019 
 **********************************************
 %chk=C:\Users\Administrator\Documents\Gaussian Interface\pr-Z_DFT-631-g#1.chk
 %mem=128MB
 %nprocshared=1
 Will use up to    1 processors via shared memory.
 Default route:  MaxDisk=2000MB
 -----------------------------------------------
 # freq rb3lyp/6-311+g(d) geom=connectivity test
 -----------------------------------------------
 1/10=4,30=1,38=1,57=2/1,3;
 2/17=6,18=5,40=1/2;
 3/5=4,6=6,7=11,11=2,16=1,25=1,30=1,74=-5/1,2,3;
 4/7=1/1;
 5/5=2,38=5/2;
 8/6=4,10=90,11=11,27=262144000/1;
 11/6=1,8=1,9=11,15=111,16=1/1,2,10;
 10/6=1/2;
 6/7=2,8=2,9=2,10=2,18=1,28=1/1;
 7/8=1,10=1,25=1/1,2,3,16;
 1/10=4,30=1/3;
 99//99;
 ----------
 [No Title]
 ----------
 Symbolic Z-matrix:
 Charge =  0 Multiplicity = 1
 C                    -0.1543    0.28983   0.19772 
 C                     0.42181   1.49445   0.0662 
 C                     0.64283  -0.92116   0.59453 
 O                     0.46012  -1.56628   1.60123 
 O                     1.58244  -1.23198  -0.32153 
 C                     3.34608  -2.58817  -1.20447 
 C                     2.39911  -2.39768  -0.03862 
 C                     1.87071   1.86983   0.22702 
 C                    -1.61893   0.08858   0.00542 
 C                    -2.38002  -0.71187   0.87152 
 C                    -3.75205  -0.85645   0.67922 
 C                    -4.39071  -0.21512  -0.38089 
 C                    -3.64276   0.57046  -1.25612 
 H                     2.44895   0.98296   0.50012 
 C                     2.02731   2.91083   1.35019 
 C                    -2.27084   0.71563  -1.06798 
 H                    -0.23909   2.33492  -0.14847 
 H                     3.99637  -1.71991  -1.3336 
 H                     2.79782  -2.74768  -2.13564 
 H                     3.97818  -3.4628   -1.02783 
 H                     1.73957  -3.25643   0.10171 
 H                     2.92985  -2.2309    0.9017 
 C                     2.43018   2.40848  -1.10252 
 H                    -1.89427  -1.20801   1.7023 
 H                    -4.32474  -1.47189   1.36603 
 H                    -5.45951  -0.33282  -0.52851 
 H                    -4.12458   1.06094  -2.09625 
 H                     3.48028   2.69621  -0.99261 
 H                     2.36475   1.65805  -1.89378 
 H                     1.87848   3.29514  -1.43261 
 H                     3.07792   3.18957   1.47595 
 H                     1.66311   2.52547   2.3058 
 H                     1.46802   3.82481   1.12413 
 H                    -1.69202   1.30268  -1.7733 
 

 GradGradGradGradGradGradGradGradGradGradGradGradGradGradGradGradGradGrad
 Berny optimization.
 Initialization pass.
 Trust Radius=3.00D-01 FncErr=1.00D-07 GrdErr=1.00D-07
 Number of steps in this run=   2 maximum allowed number of steps=   2.
 GradGradGradGradGradGradGradGradGradGradGradGradGradGradGradGradGradGrad

                          Input orientation:                          
 ---------------------------------------------------------------------
 Center     Atomic     Atomic              Coordinates (Angstroms)
 Number     Number      Type              X           Y           Z
 ---------------------------------------------------------------------
    1          6             0       -0.154303    0.289832    0.197718
    2          6             0        0.421805    1.494454    0.066196
    3          6             0        0.642834   -0.921159    0.594527
    4          8             0        0.460120   -1.566282    1.601230
    5          8             0        1.582442   -1.231984   -0.321529
    6          6             0        3.346081   -2.588169   -1.204466
    7          6             0        2.399106   -2.397680   -0.038620
    8          6             0        1.870707    1.869830    0.227020
    9          6             0       -1.618932    0.088577    0.005415
   10          6             0       -2.380020   -0.711874    0.871519
   11          6             0       -3.752048   -0.856452    0.679216
   12          6             0       -4.390714   -0.215124   -0.380891
   13          6             0       -3.642763    0.570461   -1.256123
   14          1             0        2.448953    0.982963    0.500117
   15          6             0        2.027310    2.910832    1.350190
   16          6             0       -2.270843    0.715633   -1.067975
   17          1             0       -0.239092    2.334915   -0.148470
   18          1             0        3.996369   -1.719906   -1.333598
   19          1             0        2.797815   -2.747680   -2.135638
   20          1             0        3.978176   -3.462803   -1.027826
   21          1             0        1.739574   -3.256433    0.101710
   22          1             0        2.929851   -2.230902    0.901697
   23          6             0        2.430184    2.408480   -1.102518
   24          1             0       -1.894271   -1.208014    1.702304
   25          1             0       -4.324739   -1.471886    1.366026
   26          1             0       -5.459511   -0.332824   -0.528506
   27          1             0       -4.124578    1.060936   -2.096249
   28          1             0        3.480275    2.696206   -0.992609
   29          1             0        2.364749    1.658045   -1.893775
   30          1             0        1.878484    3.295140   -1.432612
   31          1             0        3.077919    3.189573    1.475945
   32          1             0        1.663112    2.525468    2.305803
   33          1             0        1.468020    3.824809    1.124127
   34          1             0       -1.692020    1.302675   -1.773301
 ---------------------------------------------------------------------
                    Distance matrix (angstroms):
                    1          2          3          4          5
     1  C    0.000000
     2  C    1.341757   0.000000
     3  C    1.503125   2.482574   0.000000
     4  O    2.406766   3.424310   1.209553   0.000000
     5  O    2.366817   2.988457   1.348567   2.251303   0.000000
     6  C    4.743595   5.180133   3.650047   4.152704   2.393583
     7  C    3.714630   4.366854   2.380227   2.672077   1.451146
     8  C    2.568641   1.505353   3.071214   3.960439   3.163108
     9  C    1.490846   2.478869   2.546018   3.099619   3.478444
    10  C    2.532042   3.656043   3.042724   3.054323   4.170729
    11  C    3.806518   4.829451   4.396174   4.369935   5.440524
    12  C    4.305456   5.126683   5.175571   5.411564   6.059383
    13  C    3.789691   4.372986   4.900630   5.437259   5.605804
    14  H    2.710870   2.135238   2.626149   3.415634   2.516333
    15  C    3.599621   2.496480   4.143906   4.750122   4.489485
    16  C    2.502604   3.023782   3.732628   4.448590   4.381575
    17  H    2.075909   1.090523   3.454252   4.332400   4.008828
    18  H    4.859224   5.006899   3.949919   4.598029   2.662592
    19  H    4.835910   5.337527   3.928603   4.563409   2.658093
    20  H    5.715034   6.198311   4.496275   4.783873   3.348873
    21  H    4.021440   4.930386   2.626635   2.596570   2.074178
    22  H    4.044959   4.568001   2.653343   2.651535   2.075965
    23  C    3.585925   2.496983   4.142593   5.195203   3.818585
    24  H    2.744961   3.917192   2.783228   2.383638   4.022935
    25  H    4.675589   5.746165   5.057202   4.791566   6.148185
    26  H    5.390764   6.187285   6.232652   6.410868   7.102143
    27  H    4.649728   5.053089   5.822130   6.449270   6.401343
    28  H    4.518592   3.452465   4.863682   5.832507   4.413932
    29  H    3.548517   2.764648   3.976045   5.122398   3.381749
    30  H    3.977697   2.758770   4.838729   5.903336   4.670867
    31  H    4.526546   3.451922   4.858462   5.430168   5.001753
    32  H    3.570026   2.760375   3.981039   4.322734   4.585611
    33  H    3.998278   2.764840   4.846196   5.505211   5.260624
    34  H    2.697284   2.808698   4.000449   4.924437   4.387965
                    6          7          8          9         10
     6  C    0.000000
     7  C    1.514016   0.000000
     8  C    4.909138   4.308296   0.000000
     9  C    5.768894   4.725256   3.924226   0.000000
    10  C    6.373259   5.148819   5.014903   1.403607   0.000000
    11  C    7.545233   6.381800   6.265179   2.428430   1.392962
    12  C    8.134348   7.140193   6.627366   2.815003   2.420368
    13  C    7.669651   6.840786   5.855461   2.433019   2.786712
    14  H    4.057515   3.423663   1.093382   4.194323   5.131217
    15  C    6.205194   5.499757   1.539390   4.802981   5.725180
    16  C    6.517942   5.706200   4.490169   1.403693   2.410671
    17  H    6.181048   5.419374   2.192840   2.640771   3.860942
    18  H    1.092442   2.165085   4.454231   6.049394   6.821804
    19  H    1.092301   2.163089   5.269068   5.668873   6.324356
    20  H    1.093495   2.146271   5.869671   6.708763   7.183438
    21  H    2.175669   1.091848   5.129471   4.741089   4.902901
    22  H    2.176421   1.092566   4.288704   5.184084   5.522960
    23  C    5.080921   4.922603   1.539750   4.796333   6.063950
    24  H    6.149425   4.783221   5.081796   2.153228   1.082733
    25  H    8.166700   6.931105   7.130775   3.407007   2.145714
    26  H    9.114930   8.140115   7.691203   3.900346   3.403970
    27  H    8.361937   7.665136   6.480380   3.411852   3.872207
    28  H    5.290322   5.294025   2.181995   5.813578   7.030863
    29  H    4.412311   4.460010   2.187853   4.684001   5.981321
    30  H    6.067884   5.884085   2.187681   4.958012   6.284906
    31  H    6.374858   5.828558   2.181489   5.817134   6.736150
    32  H    6.426792   5.502308   2.189588   4.690633   5.374427
    33  H    7.076422   6.398302   2.188356   4.973954   5.954218
    34  H    6.390986   5.782651   4.125042   2.154810   3.395118
                   11         12         13         14         15
    11  C    0.000000
    12  C    1.393923   0.000000
    13  C    2.406982   1.393774   0.000000
    14  H    6.470544   6.999474   6.353231   0.000000
    15  C    6.931350   7.345698   6.664828   2.148741   0.000000
    16  C    2.778146   2.415004   1.392350   4.980648   5.398198
    17  H    4.817753   4.877774   3.990635   3.077990   2.777452
    18  H    8.052015   8.574099   7.975470   3.614209   5.702951
    19  H    7.375693   7.820993   7.298264   4.581114   6.690548
    20  H    8.334472   9.000237   8.625430   4.943477   7.077009
    21  H    6.020908   6.860240   6.742283   4.316761   6.298941
    22  H    6.825422   7.700589   7.463449   3.274364   5.239576
    23  C    7.214870   7.343616   6.346857   2.144969   2.535832
    24  H    2.149800   3.399671   3.869430   5.010911   5.698041
    25  H    1.085561   2.153026   3.392925   7.256651   7.717318
    26  H    2.155970   1.085343   2.155440   8.082893   8.372771
    27  H    3.393871   2.154440   1.085598   7.068133   7.290115
    28  H    8.229391   8.414423   7.438138   2.495407   2.765118
    29  H    7.096350   7.171740   6.138374   2.488683   3.493802
    30  H    7.307423   7.261605   6.159480   3.067090   2.813153
    31  H    7.978317   8.415479   7.713074   2.493384   1.094208
    32  H    6.588408   7.167843   6.682939   2.501474   1.092859
    33  H    7.025757   7.273988   6.509721   3.070457   1.095109
    34  H    3.862691   3.394918   2.146860   4.734797   5.116227
                   16         17         18         19         20
    16  C    0.000000
    17  H    2.756007   0.000000
    18  H    6.729068   5.982076   0.000000
    19  H    6.231030   6.245351   1.770909   0.000000
    20  H    7.517392   7.223029   1.769609   1.769718   0.000000
    21  H    5.764453   5.936403   3.084501   2.526743   2.515905
    22  H    6.293560   5.656124   2.528858   3.083812   2.517861
    23  C    4.996657   2.835605   4.421527   5.271478   6.072382
    24  H    3.393622   4.326353   6.646681   6.254282   6.857355
    25  H    3.863689   5.786013   8.751590   8.038661   8.867507
    26  H    3.399690   5.874865   9.590925   8.752019   9.955703
    27  H    2.147770   4.529224   8.617685   7.901053   9.341326
    28  H    6.083067   3.831030   4.459223   5.604299   6.179202
    29  H    4.801958   3.206904   3.792959   4.433560   5.438391
    30  H    4.899360   2.656159   5.444807   6.152649   7.088184
    31  H    6.418813   3.791006   5.730625   6.955067   7.164736
    32  H    5.489434   3.110972   6.059086   6.987134   7.234086
    33  H    5.333984   2.598753   6.570907   7.456007   8.002567
    34  H    1.084960   2.411762   6.456555   6.057663   7.444235
                   21         22         23         24         25
    21  H    0.000000
    22  H    1.763080   0.000000
    23  C    5.832525   5.078426   0.000000
    24  H    4.467969   4.995941   6.296584   0.000000
    25  H    6.446627   7.308952   8.171899   2.467769   0.000000
    26  H    7.795607   8.719494   8.372068   4.295743   2.484838
    27  H    7.606509   8.341993   6.765226   4.954938   4.294485
    28  H    6.297737   5.307330   1.094330   7.168768   9.157204
    29  H    5.340871   4.822646   1.092484   6.267801   8.072919
    30  H    6.730271   6.090280   1.095217   6.658812   8.308844
    31  H    6.725376   5.452819   2.770945   6.641738   8.748750
    32  H    6.188235   5.118515   3.495531   5.192116   7.260605
    33  H    7.159823   6.233623   2.808860   6.080181   7.852996
    34  H    6.006411   6.403395   4.320338   4.292353   4.948209
                   26         27         28         29         30
    26  H    0.000000
    27  H    2.486450   0.000000
    28  H    9.450407   7.856584   0.000000
    29  H    8.188197   6.519885   1.770389   0.000000
    30  H    8.235636   6.439630   1.765803   1.768956   0.000000
    31  H    9.450546   8.316708   2.549325   3.769510   3.147935
    32  H    8.181375   7.417565   3.769715   4.345247   3.822895
    33  H    8.246684   7.020468   3.131052   3.821874   2.643094
    34  H    4.291662   2.465780   5.413321   4.074086   4.102985
                   31         32         33         34
    31  H    0.000000
    32  H    1.769570   0.000000
    33  H    1.766090   1.767118   0.000000
    34  H    6.072092   5.421367   4.974143   0.000000
 Stoichiometry    C14H18O2
 Framework group  C1[X(C14H18O2)]
 Deg. of freedom    96
 Full point group                 C1      NOp   1
 Largest Abelian subgroup         C1      NOp   1
 Largest concise Abelian subgroup C1      NOp   1
                         Standard orientation:                         
 ---------------------------------------------------------------------
 Center     Atomic     Atomic              Coordinates (Angstroms)
 Number     Number      Type              X           Y           Z
 ---------------------------------------------------------------------
    1          6             0       -0.154303    0.289832    0.197718
    2          6             0        0.421805    1.494454    0.066196
    3          6             0        0.642834   -0.921159    0.594527
    4          8             0        0.460120   -1.566282    1.601230
    5          8             0        1.582442   -1.231984   -0.321529
    6          6             0        3.346081   -2.588169   -1.204466
    7          6             0        2.399106   -2.397680   -0.038620
    8          6             0        1.870707    1.869830    0.227020
    9          6             0       -1.618932    0.088577    0.005415
   10          6             0       -2.380020   -0.711874    0.871519
   11          6             0       -3.752048   -0.856452    0.679216
   12          6             0       -4.390714   -0.215124   -0.380891
   13          6             0       -3.642763    0.570461   -1.256123
   14          1             0        2.448953    0.982963    0.500117
   15          6             0        2.027310    2.910832    1.350190
   16          6             0       -2.270843    0.715633   -1.067975
   17          1             0       -0.239092    2.334915   -0.148470
   18          1             0        3.996369   -1.719906   -1.333598
   19          1             0        2.797815   -2.747680   -2.135638
   20          1             0        3.978176   -3.462803   -1.027826
   21          1             0        1.739574   -3.256433    0.101710
   22          1             0        2.929851   -2.230902    0.901697
   23          6             0        2.430184    2.408480   -1.102518
   24          1             0       -1.894271   -1.208014    1.702304
   25          1             0       -4.324739   -1.471886    1.366026
   26          1             0       -5.459511   -0.332825   -0.528506
   27          1             0       -4.124578    1.060936   -2.096249
   28          1             0        3.480275    2.696206   -0.992609
   29          1             0        2.364749    1.658045   -1.893775
   30          1             0        1.878484    3.295140   -1.432612
   31          1             0        3.077919    3.189573    1.475945
   32          1             0        1.663112    2.525468    2.305803
   33          1             0        1.468020    3.824809    1.124127
   34          1             0       -1.692020    1.302675   -1.773301
 ---------------------------------------------------------------------
 Rotational constants (GHZ):      0.6471048      0.3391548      0.2665404
 Standard basis: 6-311+G(d) (5D, 7F)
 There are   406 symmetry adapted basis functions of A   symmetry.
 Integral buffers will be    262144 words long.
 Raffenetti 2 integral format.
 Two-electron integral symmetry is turned on.
   406 basis functions,   666 primitive gaussians,   422 cartesian basis functions
    59 alpha electrons       59 beta electrons
       nuclear repulsion energy      1069.9181874328 Hartrees.
 NAtoms=   34 NActive=   34 NUniq=   34 SFac= 1.00D+00 NAtFMM=   60 Big=F
 One-electron integrals computed using PRISM.
 NBasis=   406 RedAO= T  NBF=   406
 NBsUse=   405 1.00D-06 NBFU=   405
 Harris functional with IExCor=  402 diagonalized for initial guess.
 ExpMin= 4.38D-02 ExpMax= 8.59D+03 ExpMxC= 1.30D+03 IAcc=2 IRadAn=         4 AccDes= 0.00D+00
 HarFok:  IExCor= 402 AccDes= 0.00D+00 IRadAn=         4 IDoV=1
 ScaDFX=  1.000000  1.000000  1.000000  1.000000
 Initial guess orbital symmetries:
       Occupied  (A) (A) (A) (A) (A) (A) (A) (A) (A) (A) (A) (A)
                 (A) (A) (A) (A) (A) (A) (A) (A) (A) (A) (A) (A)
                 (A) (A) (A) (A) (A) (A) (A) (A) (A) (A) (A) (A)
                 (A) (A) (A) (A) (A) (A) (A) (A) (A) (A) (A) (A)
                 (A) (A) (A) (A) (A) (A) (A) (A) (A) (A) (A)
       Virtual   (A) (A) (A) (A) (A) (A) (A) (A) (A) (A) (A) (A)
                 (A) (A) (A) (A) (A) (A) (A) (A) (A) (A) (A) (A)
                 (A) (A) (A) (A) (A) (A) (A) (A) (A) (A) (A) (A)
                 (A) (A) (A) (A) (A) (A) (A) (A) (A) (A) (A) (A)
                 (A) (A) (A) (A) (A) (A) (A) (A) (A) (A) (A) (A)
                 (A) (A) (A) (A) (A) (A) (A) (A) (A) (A) (A) (A)
                 (A) (A) (A) (A) (A) (A) (A) (A) (A) (A) (A) (A)
                 (A) (A) (A) (A) (A) (A) (A) (A) (A) (A) (A) (A)
                 (A) (A) (A) (A) (A) (A) (A) (A) (A) (A) (A) (A)
                 (A) (A) (A) (A) (A) (A) (A) (A) (A) (A) (A) (A)
                 (A) (A) (A) (A) (A) (A) (A) (A) (A) (A) (A) (A)
                 (A) (A) (A) (A) (A) (A) (A) (A) (A) (A) (A) (A)
                 (A) (A) (A) (A) (A) (A) (A) (A) (A) (A) (A) (A)
                 (A) (A) (A) (A) (A) (A) (A) (A) (A) (A) (A) (A)
                 (A) (A) (A) (A) (A) (A) (A) (A) (A) (A) (A) (A)
                 (A) (A) (A) (A) (A) (A) (A) (A) (A) (A) (A) (A)
                 (A) (A) (A) (A) (A) (A) (A) (A) (A) (A) (A) (A)
                 (A) (A) (A) (A) (A) (A) (A) (A) (A) (A) (A) (A)
                 (A) (A) (A) (A) (A) (A) (A) (A) (A) (A) (A) (A)
                 (A) (A) (A) (A) (A) (A) (A) (A) (A) (A) (A) (A)
                 (A) (A) (A) (A) (A) (A) (A) (A) (A) (A) (A) (A)
                 (A) (A) (A) (A) (A) (A) (A) (A) (A) (A) (A) (A)
                 (A) (A) (A) (A) (A) (A) (A) (A) (A) (A) (A) (A)
                 (A) (A) (A) (A) (A) (A) (A) (A) (A) (A) (A) (A)
                 (A) (A) (A) (A) (A) (A) (A) (A) (A) (A) (A) (A)
                 (A) (A) (A) (A) (A) (A) (A) (A) (A) (A) (A) (A)
                 (A) (A) (A) (A) (A) (A) (A) (A) (A) (A) (A) (A)
                 (A) (A) (A) (A) (A) (A) (A) (A) (A) (A) (A) (A)
                 (A) (A) (A) (A) (A) (A) (A) (A) (A) (A)
 The electronic state of the initial guess is 1-A.
 Requested convergence on RMS density matrix=1.00D-08 within 128 cycles.
 Requested convergence on MAX density matrix=1.00D-06.
 Requested convergence on             energy=1.00D-06.
 No special actions if energy rises.
 SCF Done:  E(RB+HF-LYP) =  -694.948735690     A.U. after   15 cycles
             Convg  =    0.9283D-08             -V/T =  2.0042
             S**2   =   0.0000
 Range of M.O.s used for correlation:     1   405
 NBasis=   406 NAE=    59 NBE=    59 NFC=     0 NFV=     0
 NROrb=    405 NOA=    59 NOB=    59 NVA=   346 NVB=   346

 **** Warning!!: The largest alpha MO coefficient is  0.18351775D+03

 Symmetrizing basis deriv contribution to polar:
 IMax=3 JMax=2 DiffMx= 0.00D+00
 G2DrvN: will do   18 centers at a time, making    2 passes doing MaxLOS=2.
 FoFDir/FoFCou used for L=0 through L=2.
          Differentiating once with respect to electric field.
                with respect to dipole field.
          Differentiating once with respect to nuclear coordinates.
 Integrals replicated using symmetry in FoFDir.
 MinBra= 0 MaxBra= 2 Meth= 1.
 IRaf=       0 NMat=  53 IRICut=      53 DoRegI=T DoRafI=T ISym2E= 2 JSym2E=2.
          There are 105 degrees of freedom in the 1st order CPHF.
   105 vectors were produced by pass  0.
 AX will form  53 AO Fock derivatives at one time.
   105 vectors were produced by pass  1.
   102 vectors were produced by pass  2.
   102 vectors were produced by pass  3.
   102 vectors were produced by pass  4.
   102 vectors were produced by pass  5.
    71 vectors were produced by pass  6.
    26 vectors were produced by pass  7.
     9 vectors were produced by pass  8.
     2 vectors were produced by pass  9.
     2 vectors were produced by pass 10.
 Inv2:  IOpt= 1 Iter= 1 AM= 1.62D-13 Conv= 1.00D-12.
 Inverted reduced A of dimension  728 with in-core refinement.
 Isotropic polarizability for W=    0.000000      175.34 Bohr**3.
 End of Minotr Frequency-dependent properties file   721 does not exist.

 **********************************************************************

            Population analysis using the SCF density.

 **********************************************************************

 Orbital symmetries:
       Occupied  (A) (A) (A) (A) (A) (A) (A) (A) (A) (A) (A) (A)
                 (A) (A) (A) (A) (A) (A) (A) (A) (A) (A) (A) (A)
                 (A) (A) (A) (A) (A) (A) (A) (A) (A) (A) (A) (A)
                 (A) (A) (A) (A) (A) (A) (A) (A) (A) (A) (A) (A)
                 (A) (A) (A) (A) (A) (A) (A) (A) (A) (A) (A)
       Virtual   (A) (A) (A) (A) (A) (A) (A) (A) (A) (A) (A) (A)
                 (A) (A) (A) (A) (A) (A) (A) (A) (A) (A) (A) (A)
                 (A) (A) (A) (A) (A) (A) (A) (A) (A) (A) (A) (A)
                 (A) (A) (A) (A) (A) (A) (A) (A) (A) (A) (A) (A)
                 (A) (A) (A) (A) (A) (A) (A) (A) (A) (A) (A) (A)
                 (A) (A) (A) (A) (A) (A) (A) (A) (A) (A) (A) (A)
                 (A) (A) (A) (A) (A) (A) (A) (A) (A) (A) (A) (A)
                 (A) (A) (A) (A) (A) (A) (A) (A) (A) (A) (A) (A)
                 (A) (A) (A) (A) (A) (A) (A) (A) (A) (A) (A) (A)
                 (A) (A) (A) (A) (A) (A) (A) (A) (A) (A) (A) (A)
                 (A) (A) (A) (A) (A) (A) (A) (A) (A) (A) (A) (A)
                 (A) (A) (A) (A) (A) (A) (A) (A) (A) (A) (A) (A)
                 (A) (A) (A) (A) (A) (A) (A) (A) (A) (A) (A) (A)
                 (A) (A) (A) (A) (A) (A) (A) (A) (A) (A) (A) (A)
                 (A) (A) (A) (A) (A) (A) (A) (A) (A) (A) (A) (A)
                 (A) (A) (A) (A) (A) (A) (A) (A) (A) (A) (A) (A)
                 (A) (A) (A) (A) (A) (A) (A) (A) (A) (A) (A) (A)
                 (A) (A) (A) (A) (A) (A) (A) (A) (A) (A) (A) (A)
                 (A) (A) (A) (A) (A) (A) (A) (A) (A) (A) (A) (A)
                 (A) (A) (A) (A) (A) (A) (A) (A) (A) (A) (A) (A)
                 (A) (A) (A) (A) (A) (A) (A) (A) (A) (A) (A) (A)
                 (A) (A) (A) (A) (A) (A) (A) (A) (A) (A) (A) (A)
                 (A) (A) (A) (A) (A) (A) (A) (A) (A) (A) (A) (A)
                 (A) (A) (A) (A) (A) (A) (A) (A) (A) (A) (A) (A)
                 (A) (A) (A) (A) (A) (A) (A) (A) (A) (A) (A) (A)
                 (A) (A) (A) (A) (A) (A) (A) (A) (A) (A) (A) (A)
                 (A) (A) (A) (A) (A) (A) (A) (A) (A) (A) (A) (A)
                 (A) (A) (A) (A) (A) (A) (A) (A) (A) (A) (A) (A)
                 (A) (A) (A) (A) (A) (A) (A) (A) (A) (A)
 The electronic state is 1-A.
 Alpha  occ. eigenvalues --  -19.17280 -19.11719 -10.30855 -10.23408 -10.19594
 Alpha  occ. eigenvalues --  -10.19140 -10.18671 -10.18624 -10.17734 -10.17674
 Alpha  occ. eigenvalues --  -10.17587 -10.17510 -10.17431 -10.17208 -10.16467
 Alpha  occ. eigenvalues --  -10.16399  -1.11404  -1.02720  -0.86727  -0.83298
 Alpha  occ. eigenvalues --   -0.79476  -0.77857  -0.74970  -0.73048  -0.69162
 Alpha  occ. eigenvalues --   -0.67085  -0.63640  -0.61188  -0.59571  -0.58264
 Alpha  occ. eigenvalues --   -0.56032  -0.52635  -0.50898  -0.49626  -0.48198
 Alpha  occ. eigenvalues --   -0.47100  -0.45372  -0.44901  -0.43802  -0.43011
 Alpha  occ. eigenvalues --   -0.42468  -0.42080  -0.41698  -0.40770  -0.39807
 Alpha  occ. eigenvalues --   -0.39344  -0.37814  -0.36979  -0.36571  -0.36193
 Alpha  occ. eigenvalues --   -0.35317  -0.34916  -0.34257  -0.33986  -0.31292
 Alpha  occ. eigenvalues --   -0.30113  -0.27497  -0.25681  -0.23709
 Alpha virt. eigenvalues --   -0.04283  -0.01408  -0.00268  -0.00108   0.00628
 Alpha virt. eigenvalues --    0.01191   0.01809   0.02313   0.02701   0.03155
 Alpha virt. eigenvalues --    0.03500   0.04161   0.04242   0.05021   0.05390
 Alpha virt. eigenvalues --    0.05618   0.06384   0.06600   0.06781   0.07517
 Alpha virt. eigenvalues --    0.07735   0.07881   0.08150   0.08823   0.09578
 Alpha virt. eigenvalues --    0.09850   0.10214   0.10697   0.11444   0.11679
 Alpha virt. eigenvalues --    0.11935   0.12288   0.12945   0.13084   0.13906
 Alpha virt. eigenvalues --    0.14352   0.14709   0.15247   0.15637   0.16000
 Alpha virt. eigenvalues --    0.16363   0.16502   0.16838   0.17447   0.17878
 Alpha virt. eigenvalues --    0.18024   0.18775   0.19036   0.19208   0.19813
 Alpha virt. eigenvalues --    0.19914   0.20165   0.20626   0.20677   0.20990
 Alpha virt. eigenvalues --    0.21382   0.21736   0.21867   0.22097   0.22633
 Alpha virt. eigenvalues --    0.22885   0.23634   0.23698   0.24057   0.24299
 Alpha virt. eigenvalues --    0.24417   0.24555   0.25057   0.25570   0.26011
 Alpha virt. eigenvalues --    0.26368   0.26719   0.27214   0.27656   0.27752
 Alpha virt. eigenvalues --    0.28145   0.29205   0.29536   0.30200   0.30727
 Alpha virt. eigenvalues --    0.31193   0.31283   0.31984   0.32418   0.33296
 Alpha virt. eigenvalues --    0.33485   0.33740   0.34814   0.35966   0.36336
 Alpha virt. eigenvalues --    0.37005   0.38045   0.38257   0.39761   0.40598
 Alpha virt. eigenvalues --    0.41265   0.42905   0.43502   0.43999   0.45146
 Alpha virt. eigenvalues --    0.46053   0.47463   0.48018   0.49897   0.50305
 Alpha virt. eigenvalues --    0.51694   0.52185   0.52338   0.53581   0.53670
 Alpha virt. eigenvalues --    0.53993   0.54648   0.55416   0.55889   0.56431
 Alpha virt. eigenvalues --    0.56727   0.57560   0.57842   0.58637   0.59649
 Alpha virt. eigenvalues --    0.60878   0.62090   0.62243   0.63188   0.63475
 Alpha virt. eigenvalues --    0.63816   0.65128   0.65281   0.66208   0.66698
 Alpha virt. eigenvalues --    0.67055   0.67955   0.68550   0.68953   0.69264
 Alpha virt. eigenvalues --    0.70086   0.70726   0.71053   0.71471   0.71531
 Alpha virt. eigenvalues --    0.72582   0.73113   0.73809   0.74343   0.74834
 Alpha virt. eigenvalues --    0.75816   0.76115   0.77061   0.77337   0.78512
 Alpha virt. eigenvalues --    0.79442   0.80005   0.80753   0.83396   0.83599
 Alpha virt. eigenvalues --    0.84562   0.84963   0.85485   0.87367   0.88126
 Alpha virt. eigenvalues --    0.88746   0.90245   0.91308   0.92487   0.93621
 Alpha virt. eigenvalues --    0.95263   0.95522   0.97116   1.00189   1.03491
 Alpha virt. eigenvalues --    1.05108   1.05980   1.07479   1.08765   1.10499
 Alpha virt. eigenvalues --    1.11567   1.12182   1.14393   1.17321   1.18428
 Alpha virt. eigenvalues --    1.19458   1.20712   1.21392   1.23575   1.24631
 Alpha virt. eigenvalues --    1.25895   1.28220   1.30026   1.31738   1.32922
 Alpha virt. eigenvalues --    1.34267   1.37295   1.39365   1.41572   1.42360
 Alpha virt. eigenvalues --    1.47191   1.47951   1.51215   1.51753   1.53665
 Alpha virt. eigenvalues --    1.54697   1.55840   1.56158   1.58435   1.58820
 Alpha virt. eigenvalues --    1.60356   1.61426   1.61655   1.62633   1.63106
 Alpha virt. eigenvalues --    1.63373   1.64544   1.64907   1.66473   1.69020
 Alpha virt. eigenvalues --    1.71216   1.71652   1.74145   1.75887   1.76576
 Alpha virt. eigenvalues --    1.76874   1.78419   1.79311   1.80157   1.82147
 Alpha virt. eigenvalues --    1.83869   1.85967   1.87492   1.89399   1.90979
 Alpha virt. eigenvalues --    1.92674   1.93518   1.96000   1.96981   1.99551
 Alpha virt. eigenvalues --    1.99762   2.00901   2.03661   2.05450   2.08409
 Alpha virt. eigenvalues --    2.10962   2.12647   2.16007   2.20474   2.24698
 Alpha virt. eigenvalues --    2.28286   2.29394   2.30238   2.32030   2.35350
 Alpha virt. eigenvalues --    2.39408   2.41008   2.42273   2.44366   2.45491
 Alpha virt. eigenvalues --    2.47758   2.47880   2.50142   2.50806   2.52293
 Alpha virt. eigenvalues --    2.52941   2.55558   2.56690   2.60176   2.61938
 Alpha virt. eigenvalues --    2.65365   2.67086   2.67627   2.68862   2.72946
 Alpha virt. eigenvalues --    2.77823   2.78293   2.79859   2.81376   2.83493
 Alpha virt. eigenvalues --    2.86648   2.87669   2.91407   2.91764   2.93523
 Alpha virt. eigenvalues --    2.94928   2.96752   2.98469   2.99871   3.04015
 Alpha virt. eigenvalues --    3.04879   3.06681   3.08470   3.11541   3.16071
 Alpha virt. eigenvalues --    3.16658   3.18255   3.20245   3.20635   3.21682
 Alpha virt. eigenvalues --    3.22295   3.23507   3.24751   3.26706   3.29001
 Alpha virt. eigenvalues --    3.30695   3.31261   3.32778   3.32977   3.35529
 Alpha virt. eigenvalues --    3.40017   3.42445   3.48420   3.57578   3.60686
 Alpha virt. eigenvalues --    3.62646   3.65933   3.68863   3.74198   3.84857
 Alpha virt. eigenvalues --    3.95298   3.99785   3.99996   4.01927   4.03366
 Alpha virt. eigenvalues --    4.13993   4.26753   4.38433   4.79271   5.04593
 Alpha virt. eigenvalues --    5.10788   5.22348   5.35716   5.58013   5.85722
 Alpha virt. eigenvalues --   23.33895  23.48334  23.51583  23.62990  23.66375
 Alpha virt. eigenvalues --   23.68184  23.78352  23.83874  23.84657  23.89654
 Alpha virt. eigenvalues --   24.02388  24.04999  24.14210  24.22085  49.90008
 Alpha virt. eigenvalues --   50.01087
          Condensed to atoms (all electrons):
              1          2          3          4          5          6
     1  C   20.272058  -1.109047  -6.930408   0.229875  -0.421345  -0.188826
     2  C   -1.109047  18.209199  -4.295788   0.023082  -0.139886  -0.082616
     3  C   -6.930408  -4.295788  14.906221   0.280852   0.143541   0.290499
     4  O    0.229875   0.023082   0.280852   8.004804  -0.157355   0.011754
     5  O   -0.421345  -0.139886   0.143541  -0.157355   8.384577  -0.112536
     6  C   -0.188826  -0.082616   0.290499   0.011754  -0.112536   6.047151
     7  C   -0.567905  -0.082282  -0.000957  -0.126252   0.124226  -0.116758
     8  C    0.017870  -1.301243  -1.109349   0.027598   0.038236  -0.003980
     9  C   -3.868250  -5.597666   3.201800  -0.087349   0.048938   0.028412
    10  C    0.884426  -0.812437   1.037498  -0.034476   0.073992   0.046517
    11  C   -0.065369  -0.734949   0.991813   0.046767   0.007016   0.006945
    12  C   -0.702926   0.111030  -0.033760  -0.002844   0.005183  -0.000737
    13  C    0.950168  -0.127072  -0.095498  -0.001360  -0.009028  -0.002363
    14  H    0.131746  -0.153042  -0.060004   0.002742  -0.003272  -0.002046
    15  C    0.182012  -0.020926   0.121981  -0.000728  -0.013686   0.011463
    16  C   -3.786837   2.460600  -1.334870  -0.009621  -0.046992  -0.044805
    17  H   -0.017254   0.278184  -0.029838  -0.000589  -0.001372  -0.000333
    18  H    0.003443   0.006214  -0.011398  -0.000398  -0.006909   0.367067
    19  H   -0.002186  -0.006088  -0.010502  -0.000271  -0.006506   0.374972
    20  H   -0.000595   0.000568   0.014017   0.000285   0.016324   0.410339
    21  H    0.049678   0.015839  -0.036409   0.004135  -0.044063  -0.046844
    22  H   -0.001589  -0.021015   0.000221   0.000008  -0.050016  -0.047282
    23  C    0.143574  -0.047644  -0.277487  -0.002920   0.033616  -0.023257
    24  H    0.073871  -0.010392   0.022948   0.004242   0.001208  -0.000207
    25  H    0.008930   0.001745  -0.008784   0.000135  -0.000007  -0.000008
    26  H    0.011809  -0.001766  -0.000193   0.000005  -0.000001   0.000000
    27  H   -0.006796   0.010522  -0.005928   0.000006   0.000002  -0.000010
    28  H   -0.045486   0.142530   0.012579   0.000004   0.000241   0.000538
    29  H    0.036736  -0.077687  -0.005225  -0.000028   0.000498   0.000014
    30  H    0.031472  -0.061342  -0.009384   0.000032  -0.000092  -0.000144
    31  H    0.004652   0.140876   0.011272  -0.000035   0.000148   0.000204
    32  H   -0.004952  -0.037451   0.009757  -0.000846  -0.000246  -0.000145
    33  H    0.031127  -0.105790  -0.005347   0.000120  -0.000076   0.000067
    34  H    0.072611   0.125096  -0.038754  -0.000089  -0.000685  -0.000115
              7          8          9         10         11         12
     1  C   -0.567905   0.017870  -3.868250   0.884426  -0.065369  -0.702926
     2  C   -0.082282  -1.301243  -5.597666  -0.812437  -0.734949   0.111030
     3  C   -0.000957  -1.109349   3.201800   1.037498   0.991813  -0.033760
     4  O   -0.126252   0.027598  -0.087349  -0.034476   0.046767  -0.002844
     5  O    0.124226   0.038236   0.048938   0.073992   0.007016   0.005183
     6  C   -0.116758  -0.003980   0.028412   0.046517   0.006945  -0.000737
     7  C    6.010616   0.028147   0.077228  -0.054679   0.024222   0.000825
     8  C    0.028147   8.829750  -0.634659  -0.498128  -0.017743  -0.026690
     9  C    0.077228  -0.634659  16.512887  -4.118688   0.340771  -1.328272
    10  C   -0.054679  -0.498128  -4.118688  18.359967  -3.017594   1.394604
    11  C    0.024222  -0.017743   0.340771  -3.017594   9.095459  -0.472157
    12  C    0.000825  -0.026690  -1.328272   1.394604  -0.472157   6.631645
    13  C   -0.002400   0.182944  -0.459751  -2.026206   0.969782  -0.374147
    14  H   -0.001589   0.432377   0.004282   0.005621   0.001968  -0.000162
    15  C   -0.027132  -0.288215   0.015944   0.046424  -0.010050  -0.001776
    16  C    0.053915   0.307182   0.251053  -4.917317  -1.022103   0.824172
    17  H   -0.000796  -0.030862  -0.007764  -0.056805  -0.000136   0.004604
    18  H   -0.011875  -0.001193  -0.002060   0.000345  -0.000066   0.000010
    19  H   -0.006964   0.001334   0.006798  -0.002073  -0.000244   0.000070
    20  H   -0.084203  -0.000254  -0.000258   0.000245   0.000026  -0.000001
    21  H    0.407932  -0.003337  -0.029704   0.013608  -0.000133   0.000112
    22  H    0.411363   0.004739   0.030720  -0.010411  -0.001329   0.000078
    23  C    0.045005  -0.187534   0.008464   0.082658   0.007370   0.003597
    24  H    0.000170   0.000939  -0.057746   0.295632   0.048550  -0.013926
    25  H   -0.000122  -0.000120  -0.027324   0.021606   0.282254   0.068104
    26  H   -0.000001   0.000055   0.060111  -0.095508   0.109837   0.221988
    27  H   -0.000007   0.000118   0.021958   0.016550  -0.027807   0.055315
    28  H   -0.000478  -0.174571   0.002127   0.000285  -0.000061   0.000030
    29  H    0.000928   0.017562  -0.009248  -0.004051   0.000155  -0.000112
    30  H   -0.000447  -0.004357  -0.002818  -0.000832   0.000165  -0.000143
    31  H   -0.000167  -0.218892   0.002050   0.001356   0.000045   0.000017
    32  H    0.000013  -0.002080  -0.001899   0.000625  -0.001074   0.000057
    33  H    0.000149   0.043259   0.006705  -0.000767   0.000698  -0.000153
    34  H   -0.000508   0.016008  -0.083284  -0.003014  -0.004456  -0.008262
             13         14         15         16         17         18
     1  C    0.950168   0.131746   0.182012  -3.786837  -0.017254   0.003443
     2  C   -0.127072  -0.153042  -0.020926   2.460600   0.278184   0.006214
     3  C   -0.095498  -0.060004   0.121981  -1.334870  -0.029838  -0.011398
     4  O   -0.001360   0.002742  -0.000728  -0.009621  -0.000589  -0.000398
     5  O   -0.009028  -0.003272  -0.013686  -0.046992  -0.001372  -0.006909
     6  C   -0.002363  -0.002046   0.011463  -0.044805  -0.000333   0.367067
     7  C   -0.002400  -0.001589  -0.027132   0.053915  -0.000796  -0.011875
     8  C    0.182944   0.432377  -0.288215   0.307182  -0.030862  -0.001193
     9  C   -0.459751   0.004282   0.015944   0.251053  -0.007764  -0.002060
    10  C   -2.026206   0.005621   0.046424  -4.917317  -0.056805   0.000345
    11  C    0.969782   0.001968  -0.010050  -1.022103  -0.000136  -0.000066
    12  C   -0.374147  -0.000162  -0.001776   0.824172   0.004604   0.000010
    13  C    9.279402   0.000465  -0.001783  -2.145121   0.028537  -0.000013
    14  H    0.000465   0.480503  -0.035164  -0.000084   0.005423  -0.000176
    15  C   -0.001783  -0.035164   6.588770  -0.092209  -0.001177  -0.000777
    16  C   -2.145121  -0.000084  -0.092209  15.832753   0.157449   0.000020
    17  H    0.028537   0.005423  -0.001177   0.157449   0.477726   0.000001
    18  H   -0.000013  -0.000176  -0.000777   0.000020   0.000001   0.462602
    19  H    0.000049   0.000044   0.000161   0.002649   0.000001  -0.029454
    20  H   -0.000016  -0.000022  -0.000017  -0.000250   0.000000  -0.028104
    21  H   -0.000236   0.000031  -0.000768  -0.004406   0.000002   0.006079
    22  H   -0.000007   0.000204   0.002774   0.004252  -0.000001  -0.007561
    23  C   -0.045065  -0.027202  -0.597799  -0.051937  -0.020999   0.003694
    24  H    0.010653  -0.000021   0.000086  -0.049421  -0.000030  -0.000001
    25  H   -0.015684   0.000000   0.000007  -0.009451   0.000003   0.000000
    26  H    0.104398   0.000000  -0.000001  -0.087849   0.000001   0.000000
    27  H    0.249488   0.000000   0.000043   0.007917   0.000042   0.000000
    28  H   -0.000668  -0.004835  -0.001707  -0.002582  -0.000501  -0.000026
    29  H    0.000663  -0.005332  -0.003873   0.007388   0.000514   0.000002
    30  H    0.004358   0.005778   0.027469   0.005175   0.003015  -0.000006
    31  H   -0.000144  -0.005687   0.398635  -0.000546  -0.000199   0.000002
    32  H    0.000243  -0.005419   0.392459  -0.000995   0.000192   0.000002
    33  H   -0.000602   0.006751   0.359960  -0.001554   0.002193   0.000000
    34  H    0.011189   0.000006  -0.000285   0.226824  -0.000780   0.000000
             19         20         21         22         23         24
     1  C   -0.002186  -0.000595   0.049678  -0.001589   0.143574   0.073871
     2  C   -0.006088   0.000568   0.015839  -0.021015  -0.047644  -0.010392
     3  C   -0.010502   0.014017  -0.036409   0.000221  -0.277487   0.022948
     4  O   -0.000271   0.000285   0.004135   0.000008  -0.002920   0.004242
     5  O   -0.006506   0.016324  -0.044063  -0.050016   0.033616   0.001208
     6  C    0.374972   0.410339  -0.046844  -0.047282  -0.023257  -0.000207
     7  C   -0.006964  -0.084203   0.407932   0.411363   0.045005   0.000170
     8  C    0.001334  -0.000254  -0.003337   0.004739  -0.187534   0.000939
     9  C    0.006798  -0.000258  -0.029704   0.030720   0.008464  -0.057746
    10  C   -0.002073   0.000245   0.013608  -0.010411   0.082658   0.295632
    11  C   -0.000244   0.000026  -0.000133  -0.001329   0.007370   0.048550
    12  C    0.000070  -0.000001   0.000112   0.000078   0.003597  -0.013926
    13  C    0.000049  -0.000016  -0.000236  -0.000007  -0.045065   0.010653
    14  H    0.000044  -0.000022   0.000031   0.000204  -0.027202  -0.000021
    15  C    0.000161  -0.000017  -0.000768   0.002774  -0.597799   0.000086
    16  C    0.002649  -0.000250  -0.004406   0.004252  -0.051937  -0.049421
    17  H    0.000001   0.000000   0.000002  -0.000001  -0.020999  -0.000030
    18  H   -0.029454  -0.028104   0.006079  -0.007561   0.003694  -0.000001
    19  H    0.453004  -0.027033  -0.007073   0.006208  -0.000812   0.000001
    20  H   -0.027033   0.452281  -0.003312  -0.002982  -0.000112   0.000000
    21  H   -0.007073  -0.003312   0.462968  -0.042984   0.001999  -0.000161
    22  H    0.006208  -0.002982  -0.042984   0.474813  -0.004511   0.000021
    23  C   -0.000812  -0.000112   0.001999  -0.004511   6.799914  -0.000037
    24  H    0.000001   0.000000  -0.000161   0.000021  -0.000037   0.421117
    25  H    0.000000   0.000000   0.000001   0.000000   0.000014  -0.005470
    26  H    0.000000   0.000000   0.000000   0.000000  -0.000008  -0.000246
    27  H    0.000000   0.000000   0.000000   0.000000  -0.000007   0.000071
    28  H    0.000000   0.000000  -0.000001  -0.000002   0.409573   0.000000
    29  H   -0.000004  -0.000003   0.000004  -0.000030   0.390700   0.000000
    30  H    0.000001   0.000000   0.000000   0.000002   0.355283   0.000000
    31  H    0.000000   0.000000   0.000000  -0.000004   0.002319   0.000000
    32  H    0.000000   0.000000   0.000002  -0.000034   0.001046  -0.000009
    33  H    0.000000   0.000000   0.000000   0.000001   0.014745  -0.000001
    34  H   -0.000001   0.000000   0.000002  -0.000001   0.002667  -0.000258
             25         26         27         28         29         30
     1  C    0.008930   0.011809  -0.006796  -0.045486   0.036736   0.031472
     2  C    0.001745  -0.001766   0.010522   0.142530  -0.077687  -0.061342
     3  C   -0.008784  -0.000193  -0.005928   0.012579  -0.005225  -0.009384
     4  O    0.000135   0.000005   0.000006   0.000004  -0.000028   0.000032
     5  O   -0.000007  -0.000001   0.000002   0.000241   0.000498  -0.000092
     6  C   -0.000008   0.000000  -0.000010   0.000538   0.000014  -0.000144
     7  C   -0.000122  -0.000001  -0.000007  -0.000478   0.000928  -0.000447
     8  C   -0.000120   0.000055   0.000118  -0.174571   0.017562  -0.004357
     9  C   -0.027324   0.060111   0.021958   0.002127  -0.009248  -0.002818
    10  C    0.021606  -0.095508   0.016550   0.000285  -0.004051  -0.000832
    11  C    0.282254   0.109837  -0.027807  -0.000061   0.000155   0.000165
    12  C    0.068104   0.221988   0.055315   0.000030  -0.000112  -0.000143
    13  C   -0.015684   0.104398   0.249488  -0.000668   0.000663   0.004358
    14  H    0.000000   0.000000   0.000000  -0.004835  -0.005332   0.005778
    15  C    0.000007  -0.000001   0.000043  -0.001707  -0.003873   0.027469
    16  C   -0.009451  -0.087849   0.007917  -0.002582   0.007388   0.005175
    17  H    0.000003   0.000001   0.000042  -0.000501   0.000514   0.003015
    18  H    0.000000   0.000000   0.000000  -0.000026   0.000002  -0.000006
    19  H    0.000000   0.000000   0.000000   0.000000  -0.000004   0.000001
    20  H    0.000000   0.000000   0.000000   0.000000  -0.000003   0.000000
    21  H    0.000001   0.000000   0.000000  -0.000001   0.000004   0.000000
    22  H    0.000000   0.000000   0.000000  -0.000002  -0.000030   0.000002
    23  C    0.000014  -0.000008  -0.000007   0.409573   0.390700   0.355283
    24  H   -0.005470  -0.000246   0.000071   0.000000   0.000000   0.000000
    25  H    0.471886  -0.006847  -0.000313   0.000000   0.000000   0.000000
    26  H   -0.006847   0.474705  -0.006854   0.000000   0.000000   0.000000
    27  H   -0.000313  -0.006854   0.474843   0.000000   0.000000   0.000000
    28  H    0.000000   0.000000   0.000000   0.467947  -0.024897  -0.029387
    29  H    0.000000   0.000000   0.000000  -0.024897   0.450673  -0.032655
    30  H    0.000000   0.000000   0.000000  -0.029387  -0.032655   0.456558
    31  H    0.000000   0.000000   0.000000   0.003170   0.000124  -0.000382
    32  H    0.000000   0.000000   0.000000   0.000094  -0.000296  -0.000211
    33  H    0.000000   0.000000   0.000000  -0.000397  -0.000180   0.002271
    34  H    0.000102  -0.000318  -0.005589  -0.000022   0.000026   0.000087
             31         32         33         34
     1  C    0.004652  -0.004952   0.031127   0.072611
     2  C    0.140876  -0.037451  -0.105790   0.125096
     3  C    0.011272   0.009757  -0.005347  -0.038754
     4  O   -0.000035  -0.000846   0.000120  -0.000089
     5  O    0.000148  -0.000246  -0.000076  -0.000685
     6  C    0.000204  -0.000145   0.000067  -0.000115
     7  C   -0.000167   0.000013   0.000149  -0.000508
     8  C   -0.218892  -0.002080   0.043259   0.016008
     9  C    0.002050  -0.001899   0.006705  -0.083284
    10  C    0.001356   0.000625  -0.000767  -0.003014
    11  C    0.000045  -0.001074   0.000698  -0.004456
    12  C    0.000017   0.000057  -0.000153  -0.008262
    13  C   -0.000144   0.000243  -0.000602   0.011189
    14  H   -0.005687  -0.005419   0.006751   0.000006
    15  C    0.398635   0.392459   0.359960  -0.000285
    16  C   -0.000546  -0.000995  -0.001554   0.226824
    17  H   -0.000199   0.000192   0.002193  -0.000780
    18  H    0.000002   0.000002   0.000000   0.000000
    19  H    0.000000   0.000000   0.000000  -0.000001
    20  H    0.000000   0.000000   0.000000   0.000000
    21  H    0.000000   0.000002   0.000000   0.000002
    22  H   -0.000004  -0.000034   0.000001  -0.000001
    23  C    0.002319   0.001046   0.014745   0.002667
    24  H    0.000000  -0.000009  -0.000001  -0.000258
    25  H    0.000000   0.000000   0.000000   0.000102
    26  H    0.000000   0.000000   0.000000  -0.000318
    27  H    0.000000   0.000000   0.000000  -0.005589
    28  H    0.003170   0.000094  -0.000397  -0.000022
    29  H    0.000124  -0.000296  -0.000180   0.000026
    30  H   -0.000382  -0.000211   0.002271   0.000087
    31  H    0.472053  -0.024088  -0.029692  -0.000001
    32  H   -0.024088   0.451352  -0.031899  -0.000001
    33  H   -0.029692  -0.031899   0.459400   0.000007
    34  H   -0.000001  -0.000001   0.000007   0.475877
 Mulliken atomic charges:
              1
     1  C    0.583714
     2  C   -0.699358
     3  C   -0.745117
     4  O   -0.211284
     5  O    0.136326
     6  C   -0.922927
     7  C   -0.099216
     8  C    0.555089
     9  C    1.696493
    10  C   -0.628974
    11  C   -0.558572
    12  C   -0.355371
    13  C   -0.485174
    14  H    0.226118
    15  C   -1.050112
    16  C   -0.532399
    17  H    0.211549
    18  H    0.250536
    19  H    0.253918
    20  H    0.253077
    21  H    0.257038
    22  H    0.254355
    23  C   -1.018905
    24  H    0.258418
    25  H    0.219345
    26  H    0.216685
    27  H    0.216439
    28  H    0.246501
    29  H    0.257634
    30  H    0.250533
    31  H    0.242914
    32  H    0.255802
    33  H    0.249004
    34  H    0.215921
 Sum of Mulliken charges=   0.00000
 Atomic charges with hydrogens summed into heavy atoms:
              1
     1  C    0.583714
     2  C   -0.487809
     3  C   -0.745117
     4  O   -0.211284
     5  O    0.136326
     6  C   -0.165395
     7  C    0.412177
     8  C    0.781206
     9  C    1.696493
    10  C   -0.370556
    11  C   -0.339226
    12  C   -0.138686
    13  C   -0.268735
    14  H    0.000000
    15  C   -0.302393
    16  C   -0.316477
    17  H    0.000000
    18  H    0.000000
    19  H    0.000000
    20  H    0.000000
    21  H    0.000000
    22  H    0.000000
    23  C   -0.264238
    24  H    0.000000
    25  H    0.000000
    26  H    0.000000
    27  H    0.000000
    28  H    0.000000
    29  H    0.000000
    30  H    0.000000
    31  H    0.000000
    32  H    0.000000
    33  H    0.000000
    34  H    0.000000
 Sum of Mulliken charges=   0.00000
 APT atomic charges:
              1
     1  C   -0.101805
     2  C    0.029700
     3  C    1.179210
     4  O   -0.746143
     5  O   -0.918900
     6  C    0.044818
     7  C    0.566816
     8  C    0.112772
     9  C    0.086732
    10  C   -0.091332
    11  C   -0.003144
    12  C   -0.053750
    13  C   -0.017383
    14  H   -0.051842
    15  C    0.055167
    16  C   -0.080386
    17  H    0.007765
    18  H   -0.004291
    19  H   -0.001292
    20  H   -0.013768
    21  H   -0.037945
    22  H   -0.046539
    23  C    0.039976
    24  H    0.084973
    25  H    0.018284
    26  H    0.023352
    27  H    0.018941
    28  H   -0.043219
    29  H   -0.008229
    30  H   -0.014929
    31  H   -0.043999
    32  H   -0.008435
    33  H   -0.017363
    34  H    0.036187
 Sum of APT charges=   0.00000
 APT Atomic charges with hydrogens summed into heavy atoms:
              1
     1  C   -0.101805
     2  C    0.037464
     3  C    1.179210
     4  O   -0.746143
     5  O   -0.918900
     6  C    0.025468
     7  C    0.482332
     8  C    0.060930
     9  C    0.086732
    10  C   -0.006359
    11  C    0.015140
    12  C   -0.030399
    13  C    0.001558
    14  H    0.000000
    15  C   -0.014629
    16  C   -0.044199
    17  H    0.000000
    18  H    0.000000
    19  H    0.000000
    20  H    0.000000
    21  H    0.000000
    22  H    0.000000
    23  C   -0.026402
    24  H    0.000000
    25  H    0.000000
    26  H    0.000000
    27  H    0.000000
    28  H    0.000000
    29  H    0.000000
    30  H    0.000000
    31  H    0.000000
    32  H    0.000000
    33  H    0.000000
    34  H    0.000000
 Sum of APT charges=   0.00000
 Electronic spatial extent (au):  <R**2>=  4471.3004
 Charge=     0.0000 electrons
 Dipole moment (field-independent basis, Debye):
    X=     1.4764    Y=     0.4652    Z=    -1.5453  Tot=     2.1873
 Quadrupole moment (field-independent basis, Debye-Ang):
   XX=   -86.5316   YY=   -93.6910   ZZ=  -101.5394
   XY=    -2.3091   XZ=     0.7852   YZ=     0.4071
 Traceless Quadrupole moment (field-independent basis, Debye-Ang):
   XX=     7.3890   YY=     0.2297   ZZ=    -7.6187
   XY=    -2.3091   XZ=     0.7852   YZ=     0.4071
 Octapole moment (field-independent basis, Debye-Ang**2):
  XXX=     6.1565  YYY=   -21.9195  ZZZ=    -5.1421  XYY=    23.7185
  XXY=   -24.7478  XXZ=    -0.8641  XZZ=    -1.0214  YZZ=     2.4602
  YYZ=    -6.9352  XYZ=    14.1778
 Hexadecapole moment (field-independent basis, Debye-Ang**3):
 XXXX= -3503.7739 YYYY= -1775.7668 ZZZZ=  -660.6511 XXXY=    -9.5231
 XXXZ=    34.6930 YYYX=   -68.2185 YYYZ=    -0.1118 ZZZX=     0.5110
 ZZZY=    -3.3916 XXYY=  -901.6572 XXZZ=  -726.4886 YYZZ=  -425.0667
 XXYZ=   -39.8284 YYXZ=   -10.6450 ZZXY=   -11.4915
 N-N= 1.069918187433D+03 E-N=-3.757237562543D+03  KE= 6.920321335297D+02
  Exact polarizability: 216.807  15.920 164.403   0.850 -15.012 144.818
 Approx polarizability: 286.540  26.742 240.500   1.581 -41.520 233.460
 Full mass-weighted force constant matrix:
 Low frequencies ---   -8.6680   -2.3177    0.0006    0.0009    0.0012    8.0992
 Low frequencies ---   16.7029   38.5803   45.5242
 Diagonal vibrational polarizability:
       75.7969454      70.6481459      40.0523875
 Harmonic frequencies (cm**-1), IR intensities (KM/Mole), Raman scattering
 activities (A**4/AMU), depolarization ratios for plane and unpolarized
 incident light, reduced masses (AMU), force constants (mDyne/A),
 and normal coordinates:
                     1                      2                      3
                     A                      A                      A
 Frequencies --    16.1735                38.4555                45.5200
 Red. masses --     4.1108                 3.2166                 3.1337
 Frc consts  --     0.0006                 0.0028                 0.0038
 IR Inten    --     1.3160                 0.0681                 0.0824
 Atom AN      X      Y      Z        X      Y      Z        X      Y      Z
   1   6    -0.02  -0.05  -0.01     0.01  -0.01  -0.03     0.00  -0.01  -0.06
   2   6     0.00  -0.05  -0.01     0.00  -0.01  -0.04     0.00  -0.01  -0.08
   3   6    -0.04  -0.07  -0.05     0.00  -0.01  -0.02     0.00   0.00  -0.02
   4   8    -0.12  -0.17  -0.13    -0.02  -0.02  -0.03     0.02   0.06   0.02
   5   8     0.06   0.03   0.02     0.02  -0.01  -0.01    -0.01  -0.05   0.00
   6   6     0.24   0.20   0.12     0.00  -0.03  -0.01     0.07  -0.04   0.14
   7   6     0.07   0.03   0.01     0.00  -0.02  -0.01     0.01  -0.02   0.08
   8   6     0.00  -0.05  -0.03     0.00   0.01  -0.03     0.01  -0.01  -0.10
   9   6    -0.03  -0.01   0.01     0.01  -0.01  -0.01     0.00   0.00  -0.03
  10   6    -0.05   0.04   0.04    -0.01   0.14   0.10     0.02  -0.09  -0.08
  11   6    -0.06   0.09   0.06    -0.02   0.15   0.12     0.02  -0.07  -0.05
  12   6    -0.05   0.10   0.06     0.01   0.02   0.02    -0.02   0.03   0.03
  13   6    -0.03   0.05   0.03     0.03  -0.13  -0.09    -0.05   0.11   0.08
  14   1     0.00  -0.04  -0.01     0.03   0.00  -0.15     0.04  -0.04  -0.25
  15   6     0.01  -0.02  -0.07    -0.01  -0.12   0.10     0.04  -0.16   0.03
  16   6    -0.02   0.00   0.01     0.03  -0.14  -0.10    -0.04   0.09   0.05
  17   1     0.00  -0.05   0.02    -0.01  -0.02  -0.04     0.00  -0.01  -0.07
  18   1     0.23   0.24   0.31     0.01  -0.04   0.00     0.06  -0.04   0.14
  19   1     0.39   0.28   0.03     0.00  -0.02  -0.01     0.13  -0.09   0.11
  20   1     0.25   0.20   0.12    -0.01  -0.04  -0.01     0.08  -0.03   0.20
  21   1     0.08  -0.01  -0.18    -0.01  -0.01  -0.01     0.02  -0.03   0.07
  22   1    -0.07  -0.06   0.10     0.00  -0.03  -0.01    -0.05   0.02   0.10
  23   6    -0.02  -0.09  -0.05    -0.05   0.19   0.03    -0.07   0.18  -0.06
  24   1    -0.05   0.03   0.03    -0.03   0.24   0.17     0.05  -0.15  -0.14
  25   1    -0.07   0.12   0.08    -0.04   0.27   0.21     0.04  -0.14  -0.09
  26   1    -0.05   0.14   0.08     0.00   0.03   0.04    -0.03   0.04   0.06
  27   1    -0.02   0.06   0.03     0.05  -0.24  -0.16    -0.08   0.19   0.14
  28   1    -0.02  -0.08  -0.07    -0.05   0.20   0.04    -0.07   0.17  -0.08
  29   1    -0.02  -0.12  -0.03    -0.05   0.30  -0.07    -0.12   0.30  -0.16
  30   1    -0.02  -0.11  -0.08    -0.07   0.23   0.16    -0.10   0.23   0.10
  31   1     0.01  -0.02  -0.08    -0.02  -0.09   0.10     0.04  -0.14   0.00
  32   1     0.02   0.01  -0.05     0.04  -0.26   0.06     0.12  -0.31   0.00
  33   1     0.01  -0.02  -0.09    -0.06  -0.12   0.23    -0.01  -0.15   0.20
  34   1    -0.01  -0.03   0.00     0.06  -0.25  -0.18    -0.07   0.15   0.08
                     4                      5                      6
                     A                      A                      A
 Frequencies --    65.3456                73.1195                87.4092
 Red. masses --     2.9272                 3.5397                 2.6195
 Frc consts  --     0.0074                 0.0112                 0.0118
 IR Inten    --     1.3088                 0.3640                 0.0941
 Atom AN      X      Y      Z        X      Y      Z        X      Y      Z
   1   6    -0.01   0.04   0.02     0.00   0.02   0.12    -0.04   0.01   0.00
   2   6     0.01   0.03   0.01     0.01   0.02   0.12     0.00  -0.02  -0.02
   3   6    -0.02   0.04   0.02    -0.02  -0.01   0.06    -0.03   0.02   0.02
   4   8     0.06   0.11   0.08    -0.09  -0.10  -0.01     0.02   0.06   0.05
   5   8    -0.14  -0.05  -0.07     0.03   0.06   0.09    -0.04   0.03   0.00
   6   6     0.08   0.15   0.05    -0.07   0.02  -0.03    -0.03   0.11  -0.05
   7   6    -0.16  -0.08  -0.10    -0.02   0.00   0.01     0.12   0.16   0.06
   8   6     0.03  -0.02   0.00     0.02   0.02  -0.05     0.02  -0.10  -0.01
   9   6    -0.01   0.03   0.02     0.01   0.03   0.09    -0.04   0.01   0.00
  10   6     0.00   0.03   0.02    -0.03   0.00   0.03    -0.04   0.02   0.01
  11   6     0.01  -0.03   0.00    -0.01  -0.04  -0.08    -0.04   0.00  -0.01
  12   6     0.01  -0.08  -0.03     0.04  -0.06  -0.12    -0.03  -0.03  -0.03
  13   6     0.00  -0.07  -0.03     0.08  -0.02  -0.06    -0.03  -0.03  -0.03
  14   1    -0.01  -0.05  -0.01     0.07   0.01  -0.16    -0.03  -0.14  -0.05
  15   6     0.09  -0.05   0.01     0.19  -0.01  -0.05     0.10  -0.16   0.03
  16   6    -0.01  -0.01  -0.01     0.06   0.02   0.05    -0.04  -0.01  -0.02
  17   1     0.03   0.05   0.01    -0.01   0.02   0.17     0.04   0.01  -0.03
  18   1     0.09   0.18   0.35    -0.03  -0.01  -0.01    -0.17   0.18  -0.29
  19   1     0.27   0.32  -0.09    -0.10   0.10  -0.02    -0.14  -0.12   0.06
  20   1     0.06   0.13   0.02    -0.11  -0.02  -0.10     0.13   0.23  -0.01
  21   1    -0.17  -0.12  -0.38    -0.06   0.03  -0.02     0.24   0.11   0.28
  22   1    -0.35  -0.23   0.03     0.01  -0.07   0.00     0.24   0.37  -0.04
  23   6     0.03  -0.04   0.00    -0.18   0.06  -0.12     0.05  -0.09   0.00
  24   1     0.01   0.06   0.05    -0.07   0.00   0.05    -0.04   0.04   0.02
  25   1     0.02  -0.03   0.00    -0.04  -0.07  -0.12    -0.04   0.01   0.00
  26   1     0.02  -0.13  -0.05     0.06  -0.10  -0.21    -0.03  -0.04  -0.04
  27   1     0.00  -0.11  -0.05     0.13  -0.03  -0.09    -0.03  -0.05  -0.04
  28   1     0.05  -0.09  -0.01    -0.16   0.04  -0.28     0.07  -0.17   0.00
  29   1    -0.01  -0.02  -0.01    -0.32   0.09  -0.14    -0.01  -0.06  -0.03
  30   1     0.07   0.00   0.02    -0.23   0.07   0.00     0.11  -0.04   0.04
  31   1     0.11  -0.10   0.00     0.21   0.00  -0.21     0.12  -0.24   0.03
  32   1     0.09  -0.04   0.01     0.36  -0.04   0.00     0.09  -0.18   0.01
  33   1     0.13  -0.02   0.03     0.15  -0.01   0.07     0.16  -0.11   0.08
  34   1    -0.01  -0.01  -0.01     0.10   0.04   0.09    -0.04  -0.01  -0.02
                     7                      8                      9
                     A                      A                      A
 Frequencies --   103.2509               138.9288               175.8219
 Red. masses --     4.8128                 3.3122                 2.7304
 Frc consts  --     0.0302                 0.0377                 0.0497
 IR Inten    --     0.9415                 1.2649                 2.4863
 Atom AN      X      Y      Z        X      Y      Z        X      Y      Z
   1   6     0.00  -0.10   0.06     0.01  -0.03   0.03    -0.02   0.00  -0.04
   2   6    -0.05  -0.08   0.07     0.05  -0.06  -0.17    -0.06   0.03   0.03
   3   6     0.05  -0.07   0.08    -0.01  -0.01   0.13     0.06   0.07   0.01
   4   8     0.20   0.04   0.17    -0.06  -0.03   0.10     0.05   0.08   0.01
   5   8    -0.06  -0.12  -0.03     0.03   0.05   0.16     0.14   0.13   0.07
   6   6     0.05   0.07  -0.07    -0.09   0.14  -0.10    -0.01  -0.02  -0.01
   7   6     0.07  -0.03  -0.04    -0.03  -0.03  -0.02    -0.02   0.00  -0.02
   8   6    -0.07  -0.01   0.01     0.03  -0.03  -0.10    -0.05  -0.03   0.03
   9   6     0.02  -0.10  -0.01     0.01  -0.02   0.02    -0.01  -0.07  -0.08
  10   6    -0.06  -0.04  -0.03     0.00  -0.03   0.00     0.00  -0.06  -0.07
  11   6    -0.08   0.11  -0.04     0.00  -0.02  -0.02    -0.02   0.01   0.01
  12   6    -0.01   0.20  -0.03     0.01   0.01  -0.01    -0.05   0.07   0.06
  13   6     0.09   0.11  -0.04     0.03   0.03   0.02    -0.04   0.00   0.00
  14   1     0.00   0.03   0.00     0.05  -0.01  -0.09    -0.09  -0.06   0.01
  15   6    -0.07   0.03  -0.03    -0.12  -0.07  -0.04     0.08  -0.06   0.04
  16   6     0.10  -0.04  -0.03     0.03   0.00   0.03    -0.02  -0.07  -0.08
  17   1    -0.09  -0.11   0.07     0.07  -0.08  -0.30    -0.06   0.03   0.03
  18   1    -0.07   0.16  -0.11    -0.02   0.12   0.07     0.27  -0.20   0.23
  19   1     0.03  -0.01  -0.05    -0.15   0.41  -0.11    -0.02   0.37  -0.07
  20   1     0.17   0.16  -0.09    -0.15   0.05  -0.34    -0.31  -0.27  -0.18
  21   1     0.17  -0.10   0.00    -0.07  -0.02  -0.15    -0.15   0.08  -0.14
  22   1     0.09   0.04  -0.06     0.01  -0.21  -0.01    -0.03  -0.19   0.02
  23   6    -0.18  -0.01  -0.04     0.12   0.06  -0.02    -0.06  -0.08   0.00
  24   1    -0.12  -0.09  -0.02    -0.02  -0.05  -0.01     0.02  -0.08  -0.09
  25   1    -0.16   0.18  -0.05    -0.01  -0.03  -0.04    -0.01   0.05   0.04
  26   1    -0.02   0.33  -0.03     0.01   0.03  -0.02    -0.07   0.15   0.13
  27   1     0.15   0.16  -0.05     0.04   0.05   0.02    -0.06   0.02   0.02
  28   1    -0.19   0.06  -0.12     0.10   0.11   0.09    -0.02  -0.20  -0.06
  29   1    -0.19  -0.03  -0.01     0.23   0.10  -0.07    -0.18  -0.08   0.01
  30   1    -0.26  -0.05  -0.02     0.11   0.05  -0.03     0.02  -0.03   0.03
  31   1    -0.09   0.12  -0.10    -0.15   0.00   0.06     0.11  -0.16   0.01
  32   1     0.01   0.03   0.01    -0.17  -0.14  -0.09     0.07  -0.04   0.04
  33   1    -0.16  -0.02  -0.02    -0.17  -0.10  -0.04     0.16   0.00   0.07
  34   1     0.17  -0.11  -0.02     0.04   0.00   0.03    -0.03  -0.10  -0.10
                    10                     11                     12
                     A                      A                      A
 Frequencies --   209.1165               225.1989               242.1875
 Red. masses --     3.6488                 1.0491                 1.1661
 Frc consts  --     0.0940                 0.0313                 0.0403
 IR Inten    --     1.5138                 0.0450                 0.1950
 Atom AN      X      Y      Z        X      Y      Z        X      Y      Z
   1   6    -0.03   0.00   0.06     0.00   0.00   0.00     0.00   0.00   0.02
   2   6    -0.03  -0.02  -0.04     0.00   0.00   0.00    -0.03   0.02  -0.02
   3   6     0.07   0.03  -0.03     0.00   0.00   0.00     0.01   0.00   0.01
   4   8     0.16   0.01  -0.03    -0.01   0.00   0.00     0.00  -0.02  -0.01
   5   8     0.08   0.08  -0.06     0.00  -0.01   0.00     0.00   0.01  -0.01
   6   6     0.07  -0.12   0.03     0.00   0.01   0.00     0.00  -0.01   0.01
   7   6     0.01   0.03  -0.04     0.00   0.00   0.00    -0.01   0.00  -0.01
   8   6    -0.03  -0.04  -0.06     0.00   0.00  -0.01    -0.03   0.02  -0.02
   9   6    -0.06   0.05   0.15     0.00  -0.01   0.00     0.00  -0.03   0.03
  10   6    -0.12   0.07   0.12     0.01  -0.01  -0.01    -0.01  -0.04   0.01
  11   6    -0.10   0.01  -0.03     0.00   0.00   0.00    -0.02  -0.01  -0.01
  12   6    -0.02  -0.06  -0.12     0.00   0.01   0.01     0.00   0.02   0.00
  13   6     0.02   0.02  -0.02     0.00   0.00   0.00     0.03   0.00   0.00
  14   1    -0.04  -0.05  -0.05     0.00   0.00  -0.02    -0.05   0.00  -0.02
  15   6    -0.10  -0.09  -0.01     0.03  -0.01   0.00     0.00   0.02  -0.03
  16   6    -0.01   0.07   0.13     0.01  -0.01  -0.01     0.03  -0.03   0.02
  17   1    -0.02   0.00   0.01    -0.01   0.00   0.01    -0.05   0.00  -0.02
  18   1     0.32  -0.29   0.13    -0.03   0.02  -0.01    -0.07   0.04  -0.05
  19   1     0.12   0.06  -0.03    -0.01  -0.01   0.00     0.02  -0.12   0.01
  20   1    -0.18  -0.29   0.05     0.02   0.02   0.00     0.08   0.06   0.08
  21   1    -0.06   0.09  -0.05     0.00  -0.01   0.00    -0.02   0.00  -0.02
  22   1    -0.02   0.00  -0.02     0.00   0.00   0.00    -0.02  -0.01   0.00
  23   6     0.03  -0.03  -0.02    -0.03   0.03  -0.01     0.03   0.03   0.01
  24   1    -0.18   0.08   0.16     0.01  -0.01  -0.01    -0.03  -0.05   0.01
  25   1    -0.15  -0.01  -0.09     0.00   0.00   0.00    -0.04   0.00  -0.02
  26   1     0.01  -0.15  -0.26     0.00   0.02   0.01     0.00   0.06   0.00
  27   1     0.10   0.01  -0.06     0.00   0.00   0.00     0.04   0.01   0.00
  28   1     0.00   0.05   0.05    -0.12   0.34   0.06     0.16  -0.41  -0.05
  29   1     0.14  -0.05  -0.01     0.25  -0.07   0.06    -0.34   0.21  -0.13
  30   1    -0.01  -0.07  -0.09    -0.25  -0.16  -0.14     0.35   0.32   0.24
  31   1    -0.11  -0.14   0.13     0.10  -0.39   0.30     0.04  -0.21   0.15
  32   1    -0.24  -0.10  -0.07    -0.38   0.16  -0.09    -0.26   0.14  -0.07
  33   1    -0.03  -0.05  -0.04     0.43   0.18  -0.20     0.25   0.14  -0.17
  34   1     0.04   0.09   0.19     0.01  -0.01  -0.01     0.05  -0.04   0.02
                    13                     14                     15
                     A                      A                      A
 Frequencies --   259.1277               266.7113               274.5372
 Red. masses --     2.3535                 2.7006                 1.9594
 Frc consts  --     0.0931                 0.1132                 0.0870
 IR Inten    --     1.3601                 1.6179                 2.2255
 Atom AN      X      Y      Z        X      Y      Z        X      Y      Z
   1   6    -0.01   0.04   0.04     0.02   0.00  -0.05     0.01  -0.01  -0.04
   2   6    -0.04   0.03  -0.03    -0.02   0.00   0.00     0.00   0.00   0.00
   3   6     0.00   0.07   0.00    -0.02  -0.01  -0.02     0.05   0.01   0.02
   4   8     0.00  -0.01  -0.05    -0.05   0.03   0.00     0.00   0.04   0.03
   5   8    -0.01   0.12  -0.03    -0.02  -0.05   0.00     0.12   0.01   0.09
   6   6    -0.04   0.00   0.06    -0.01   0.03  -0.01     0.04  -0.02  -0.05
   7   6    -0.12   0.05  -0.02     0.04   0.00   0.03     0.00  -0.12  -0.05
   8   6    -0.04  -0.02  -0.03    -0.06  -0.04   0.01    -0.01   0.00   0.02
   9   6     0.04  -0.04   0.03     0.05   0.07  -0.03    -0.02   0.04  -0.02
  10   6     0.05  -0.07   0.01     0.11   0.09   0.02    -0.02   0.07   0.00
  11   6     0.04  -0.01   0.00     0.12   0.02   0.03    -0.01   0.02   0.00
  12   6     0.07   0.06   0.03     0.11  -0.05  -0.01    -0.03  -0.05  -0.03
  13   6     0.09   0.01   0.01     0.05   0.03   0.01    -0.06   0.00   0.00
  14   1    -0.07  -0.04  -0.03    -0.07  -0.05   0.01    -0.01   0.00   0.01
  15   6    -0.06  -0.09   0.03    -0.13  -0.07   0.05    -0.01  -0.01   0.02
  16   6     0.09  -0.05   0.00     0.04   0.10   0.00    -0.06   0.06   0.00
  17   1    -0.03   0.03  -0.06    -0.03   0.00   0.01     0.00   0.00   0.01
  18   1    -0.28   0.15  -0.14     0.11  -0.05   0.09    -0.33   0.23  -0.25
  19   1     0.05  -0.40   0.07    -0.07   0.24  -0.02     0.09  -0.44  -0.01
  20   1     0.20   0.23   0.33    -0.13  -0.09  -0.16     0.41   0.29   0.13
  21   1    -0.19   0.10  -0.08     0.08  -0.03   0.08    -0.09  -0.08  -0.21
  22   1    -0.18  -0.01   0.02     0.06   0.05   0.01    -0.01  -0.31  -0.01
  23   6    -0.02  -0.07  -0.04    -0.14  -0.11  -0.04    -0.04  -0.03   0.00
  24   1     0.04  -0.09  -0.01     0.15   0.14   0.03    -0.01   0.10   0.02
  25   1     0.02  -0.01  -0.01     0.15   0.00   0.03     0.01   0.01   0.01
  26   1     0.06   0.13   0.05     0.13  -0.14  -0.03    -0.02  -0.12  -0.05
  27   1     0.10   0.02   0.01     0.01   0.01   0.02    -0.07   0.00   0.00
  28   1    -0.06   0.05  -0.01    -0.07  -0.31  -0.22    -0.02  -0.05  -0.05
  29   1     0.10  -0.17   0.04    -0.42  -0.10  -0.03    -0.09  -0.03   0.01
  30   1    -0.10  -0.17  -0.17    -0.04  -0.01   0.05    -0.03  -0.02   0.01
  31   1    -0.08   0.00   0.01    -0.13  -0.16   0.25     0.00  -0.03   0.04
  32   1     0.02  -0.21   0.01    -0.34  -0.08  -0.03    -0.03   0.00   0.01
  33   1    -0.17  -0.12   0.15    -0.02  -0.02  -0.02     0.01   0.00   0.01
  34   1     0.13  -0.09   0.01     0.02   0.13   0.01    -0.09   0.09   0.00
                    16                     17                     18
                     A                      A                      A
 Frequencies --   324.8402               384.7321               386.1166
 Red. masses --     4.9536                 3.2914                 3.4402
 Frc consts  --     0.3080                 0.2870                 0.3022
 IR Inten    --     6.9237                 5.5944                 0.2254
 Atom AN      X      Y      Z        X      Y      Z        X      Y      Z
   1   6    -0.01  -0.04   0.06     0.00   0.06   0.11     0.02  -0.04  -0.07
   2   6     0.12  -0.12   0.00     0.07   0.02   0.01     0.18  -0.11   0.07
   3   6    -0.01  -0.06   0.08    -0.06   0.01   0.12    -0.01   0.04  -0.10
   4   8     0.24  -0.23   0.02    -0.12   0.00   0.10    -0.08   0.17  -0.03
   5   8    -0.04   0.12  -0.01    -0.08   0.04   0.02     0.04   0.05  -0.03
   6   6    -0.08   0.02   0.09     0.18  -0.14  -0.08    -0.03   0.02   0.01
   7   6    -0.12   0.10   0.02     0.06   0.07  -0.17    -0.04   0.03   0.00
   8   6     0.10  -0.07   0.04     0.07   0.02   0.00     0.20  -0.14   0.06
   9   6    -0.01   0.08  -0.12     0.00   0.05   0.00     0.00  -0.04   0.05
  10   6     0.05   0.08  -0.09     0.01  -0.02  -0.05    -0.04  -0.06   0.02
  11   6     0.05   0.03   0.01     0.01  -0.02  -0.02    -0.05  -0.01   0.00
  12   6    -0.03  -0.03   0.02    -0.03   0.04   0.05    -0.02   0.02   0.00
  13   6    -0.10  -0.01  -0.03    -0.03  -0.03  -0.01     0.02  -0.03   0.00
  14   1     0.19  -0.01   0.04     0.09   0.03   0.00     0.31  -0.06   0.07
  15   6    -0.03   0.02  -0.02    -0.04  -0.01   0.04    -0.06   0.01  -0.04
  16   6    -0.08   0.07  -0.10    -0.01  -0.03  -0.05     0.02  -0.05   0.05
  17   1     0.19  -0.11  -0.18     0.11   0.02  -0.11     0.28   0.00   0.20
  18   1    -0.07   0.00   0.05     0.36  -0.28  -0.14    -0.06   0.04   0.01
  19   1    -0.03  -0.07   0.07     0.34  -0.27  -0.15    -0.04   0.01   0.02
  20   1    -0.09   0.03   0.21     0.01  -0.21   0.22    -0.01   0.04   0.01
  21   1    -0.18   0.14   0.00     0.11   0.04  -0.14    -0.08   0.05  -0.02
  22   1    -0.16   0.07   0.05     0.08   0.07  -0.18    -0.05  -0.01   0.02
  23   6    -0.07   0.02   0.01    -0.01  -0.02  -0.06    -0.06   0.02   0.02
  24   1     0.12   0.11  -0.11     0.02  -0.04  -0.08    -0.07  -0.11   0.01
  25   1     0.12   0.02   0.06     0.04  -0.06  -0.02    -0.08   0.00  -0.01
  26   1    -0.03  -0.08   0.08    -0.05   0.09   0.10    -0.03   0.06  -0.01
  27   1    -0.17  -0.05  -0.01    -0.04  -0.06  -0.03     0.07  -0.03  -0.02
  28   1    -0.05   0.00  -0.14     0.01  -0.03  -0.17    -0.06   0.08  -0.20
  29   1    -0.22   0.11  -0.06    -0.10  -0.05  -0.02    -0.22   0.13  -0.08
  30   1    -0.11   0.07   0.20    -0.03  -0.02  -0.05    -0.21   0.03   0.29
  31   1    -0.04   0.02   0.10    -0.06   0.03   0.18    -0.12   0.17   0.13
  32   1    -0.18   0.13  -0.04    -0.13  -0.07  -0.02    -0.22   0.14  -0.05
  33   1     0.02   0.00  -0.21    -0.05  -0.02   0.03    -0.13  -0.10  -0.32
  34   1    -0.16   0.11  -0.14    -0.03  -0.05  -0.08     0.04  -0.06   0.06
                    19                     20                     21
                     A                      A                      A
 Frequencies --   402.2970               417.2563               454.5381
 Red. masses --     2.8153                 2.9734                 2.9788
 Frc consts  --     0.2685                 0.3050                 0.3626
 IR Inten    --     1.0452                 0.4900                 2.4686
 Atom AN      X      Y      Z        X      Y      Z        X      Y      Z
   1   6     0.06   0.07   0.04     0.01   0.01   0.00    -0.04   0.05   0.10
   2   6     0.08   0.07   0.04     0.03   0.00  -0.01    -0.06   0.06   0.23
   3   6     0.05   0.01  -0.02     0.01   0.00  -0.01     0.00   0.00  -0.02
   4   8     0.05  -0.04  -0.05     0.01   0.00  -0.01     0.02   0.01  -0.01
   5   8     0.02  -0.07  -0.01     0.00   0.00  -0.01     0.03  -0.02   0.02
   6   6    -0.05   0.04   0.02    -0.01   0.01   0.01     0.00   0.00  -0.01
   7   6     0.01  -0.06   0.07     0.00   0.00   0.01     0.03  -0.05   0.03
   8   6     0.09   0.13  -0.03     0.03   0.02   0.01    -0.01  -0.09  -0.08
   9   6     0.00   0.03   0.04     0.00   0.00   0.00    -0.03   0.11   0.02
  10   6    -0.04  -0.05  -0.05    -0.05   0.16   0.12     0.03   0.02  -0.04
  11   6    -0.06   0.01  -0.02     0.02  -0.17  -0.12     0.05  -0.05  -0.03
  12   6    -0.09   0.03   0.02    -0.02   0.00   0.00     0.00   0.06   0.06
  13   6    -0.04  -0.07  -0.03    -0.04   0.16   0.12    -0.02  -0.03  -0.04
  14   1     0.11   0.14  -0.04     0.04   0.03   0.01    -0.03  -0.12  -0.13
  15   6    -0.05   0.00   0.14     0.00   0.01   0.03    -0.08  -0.09  -0.14
  16   6    -0.04  -0.03   0.02     0.03  -0.18  -0.12    -0.01   0.00  -0.08
  17   1     0.06   0.08   0.09     0.03   0.00  -0.02    -0.08   0.13   0.56
  18   1    -0.12   0.10   0.06    -0.02   0.02   0.01    -0.04   0.03   0.00
  19   1    -0.13   0.13   0.05    -0.02   0.02   0.01    -0.03   0.03   0.01
  20   1     0.01   0.06  -0.14     0.00   0.01  -0.01     0.04   0.02  -0.07
  21   1     0.03  -0.07   0.09     0.00   0.00   0.01     0.02  -0.05   0.01
  22   1     0.01  -0.01   0.06     0.00   0.00   0.01     0.03  -0.06   0.02
  23   6     0.04  -0.04  -0.16    -0.01  -0.01  -0.02     0.07   0.04   0.00
  24   1    -0.06  -0.13  -0.09    -0.09   0.35   0.26     0.08   0.00  -0.09
  25   1    -0.04   0.00  -0.01     0.06  -0.36  -0.26     0.09  -0.13  -0.07
  26   1    -0.10   0.09   0.05    -0.02   0.02   0.00    -0.01   0.11   0.14
  27   1     0.00  -0.11  -0.07    -0.08   0.35   0.25    -0.05  -0.10  -0.06
  28   1     0.08  -0.14  -0.33     0.00  -0.02  -0.08     0.04   0.07   0.21
  29   1    -0.13  -0.20   0.00    -0.05  -0.03   0.01     0.22   0.15  -0.12
  30   1     0.09  -0.06  -0.28    -0.01  -0.01  -0.02     0.09   0.07   0.05
  31   1    -0.09   0.01   0.39    -0.01   0.01   0.07    -0.12   0.02  -0.07
  32   1    -0.20  -0.23  -0.01    -0.02  -0.02   0.01    -0.14  -0.06  -0.15
  33   1    -0.06   0.03   0.26     0.00   0.01   0.04    -0.15  -0.16  -0.24
  34   1    -0.06  -0.02   0.00     0.07  -0.37  -0.25     0.00  -0.07  -0.13
                    22                     23                     24
                     A                      A                      A
 Frequencies --   497.4611               552.9393               633.5830
 Red. masses --     3.1040                 3.8755                 6.3372
 Frc consts  --     0.4526                 0.6981                 1.4988
 IR Inten    --     0.8254                11.5874                 0.1582
 Atom AN      X      Y      Z        X      Y      Z        X      Y      Z
   1   6     0.00  -0.10  -0.05     0.07   0.16   0.15     0.00   0.02  -0.06
   2   6    -0.02  -0.05   0.19     0.01   0.16   0.00     0.00   0.03   0.02
   3   6    -0.04  -0.05   0.00     0.11   0.12   0.08    -0.01   0.00   0.02
   4   8    -0.03   0.02   0.05    -0.03  -0.04  -0.06     0.01  -0.03   0.01
   5   8    -0.02   0.05   0.01    -0.03  -0.06  -0.03    -0.02   0.00   0.02
   6   6    -0.01   0.00   0.01     0.01   0.00   0.00     0.00   0.00   0.00
   7   6    -0.04   0.07  -0.04     0.02  -0.04   0.02     0.00   0.01  -0.01
   8   6     0.02   0.08  -0.07     0.04  -0.09   0.01     0.02  -0.01   0.00
   9   6     0.02  -0.16  -0.13     0.11  -0.15  -0.11     0.00  -0.08   0.12
  10   6     0.00   0.00   0.01    -0.01   0.00  -0.06     0.22  -0.11   0.20
  11   6    -0.01   0.06   0.06    -0.05   0.09   0.02     0.25   0.17  -0.15
  12   6     0.04  -0.11  -0.07    -0.07  -0.12  -0.09     0.00   0.08  -0.12
  13   6    -0.01   0.07   0.05    -0.04   0.05   0.09    -0.23   0.12  -0.22
  14   1     0.10   0.11  -0.11    -0.06  -0.16   0.01     0.00  -0.02   0.00
  15   6    -0.02   0.00   0.03    -0.03  -0.06  -0.08     0.00  -0.01  -0.01
  16   6     0.01   0.01  -0.01     0.00  -0.06   0.01    -0.24  -0.16   0.14
  17   1    -0.12  -0.06   0.46     0.12   0.19  -0.21     0.01   0.06   0.08
  18   1     0.04  -0.04  -0.01    -0.01   0.02   0.02     0.02  -0.02  -0.01
  19   1     0.04  -0.05  -0.01    -0.01   0.04   0.00     0.02  -0.02  -0.01
  20   1    -0.05  -0.01   0.11     0.03   0.00  -0.07    -0.01  -0.01   0.03
  21   1    -0.06   0.08  -0.05     0.07  -0.07   0.08     0.01   0.00  -0.01
  22   1    -0.05   0.04  -0.03     0.04   0.04   0.00     0.00   0.00  -0.01
  23   6     0.10   0.04  -0.12    -0.04  -0.01   0.06     0.00   0.00   0.00
  24   1    -0.02   0.16   0.11    -0.10   0.15   0.09     0.07  -0.18   0.25
  25   1    -0.05   0.23   0.18    -0.04   0.30   0.22     0.10   0.22  -0.23
  26   1     0.05  -0.17  -0.12    -0.06  -0.12  -0.10    -0.01  -0.17   0.21
  27   1    -0.06   0.24   0.17    -0.04   0.30   0.23    -0.08   0.20  -0.26
  28   1     0.12  -0.06  -0.02    -0.06   0.09   0.01     0.00   0.02  -0.02
  29   1     0.14  -0.02  -0.07    -0.03   0.07  -0.02    -0.01   0.01  -0.01
  30   1     0.21   0.06  -0.23    -0.15  -0.03   0.19    -0.02  -0.01   0.02
  31   1    -0.03  -0.01   0.16    -0.07   0.07  -0.05    -0.02   0.03   0.02
  32   1    -0.10  -0.14  -0.06    -0.07   0.02  -0.06    -0.02   0.00  -0.01
  33   1    -0.02   0.02   0.11    -0.12  -0.15  -0.23    -0.03  -0.03  -0.04
  34   1    -0.02   0.15   0.09    -0.11   0.16   0.10    -0.09  -0.20   0.22
                    25                     26                     27
                     A                      A                      A
 Frequencies --   644.9489               700.3472               709.7973
 Red. masses --     5.4381                 4.2850                 1.9606
 Frc consts  --     1.3328                 1.2383                 0.5820
 IR Inten    --    11.1119                 1.6358                40.8997
 Atom AN      X      Y      Z        X      Y      Z        X      Y      Z
   1   6     0.23  -0.12  -0.07    -0.04  -0.09   0.37    -0.01  -0.02   0.07
   2   6     0.00  -0.04   0.04     0.02  -0.21  -0.01     0.01  -0.04   0.00
   3   6     0.10  -0.04   0.04     0.07   0.02  -0.05     0.00   0.00  -0.02
   4   8    -0.08   0.01   0.05    -0.09   0.12  -0.03    -0.01   0.03   0.00
   5   8     0.00   0.01  -0.05     0.07   0.02  -0.13     0.02   0.01  -0.02
   6   6    -0.04   0.03   0.03    -0.01   0.00   0.02     0.00   0.00   0.00
   7   6    -0.06   0.10  -0.04     0.02  -0.04   0.03     0.00  -0.01   0.01
   8   6    -0.11   0.02  -0.02    -0.06   0.03  -0.02    -0.02   0.01   0.00
   9   6     0.24   0.06   0.05    -0.01  -0.03  -0.02    -0.01   0.09   0.06
  10   6     0.04   0.16  -0.11     0.04   0.03  -0.01     0.02  -0.06  -0.07
  11   6     0.03   0.07  -0.16     0.07  -0.01  -0.05    -0.01   0.12   0.08
  12   6    -0.26   0.02   0.01     0.01   0.01   0.01     0.00  -0.06  -0.04
  13   6    -0.01  -0.13   0.10    -0.05  -0.02  -0.08    -0.04   0.12   0.09
  14   1    -0.11   0.02  -0.04     0.08   0.12   0.01     0.01   0.02   0.00
  15   6    -0.02  -0.04  -0.05     0.00   0.03   0.02     0.00   0.00   0.00
  16   6     0.01  -0.05   0.16    -0.04   0.03  -0.03     0.01  -0.06  -0.05
  17   1    -0.18  -0.15   0.19    -0.01  -0.33  -0.36    -0.02  -0.07  -0.03
  18   1     0.01  -0.02   0.02    -0.10   0.07   0.05    -0.02   0.01   0.01
  19   1     0.01  -0.02   0.01    -0.09   0.08   0.05    -0.02   0.01   0.01
  20   1    -0.10   0.01   0.15     0.07   0.03  -0.14     0.01   0.00  -0.03
  21   1    -0.06   0.10  -0.02    -0.04   0.00   0.04    -0.01   0.00   0.00
  22   1    -0.07   0.12  -0.04    -0.03   0.02   0.04    -0.01   0.00   0.01
  23   6    -0.02  -0.01   0.04     0.00   0.01  -0.01     0.00   0.00   0.00
  24   1    -0.13   0.00  -0.11     0.03   0.21   0.10     0.09  -0.36  -0.28
  25   1     0.27  -0.12  -0.13     0.05   0.15   0.08     0.06  -0.12  -0.08
  26   1    -0.25  -0.03  -0.01    -0.04   0.16   0.25     0.09  -0.49  -0.33
  27   1     0.23  -0.19  -0.06    -0.12   0.14   0.05     0.02  -0.14  -0.10
  28   1    -0.02  -0.08   0.20     0.01  -0.07   0.09     0.00  -0.02   0.02
  29   1     0.06  -0.02   0.04     0.05  -0.02   0.01     0.01  -0.01   0.01
  30   1     0.08   0.02  -0.04     0.11   0.04  -0.10     0.02   0.01  -0.02
  31   1     0.02  -0.14  -0.14     0.06  -0.13  -0.06     0.01  -0.03  -0.02
  32   1     0.05  -0.04  -0.03     0.07  -0.01   0.04     0.02   0.00   0.01
  33   1     0.04   0.02   0.03     0.10   0.11   0.15     0.02   0.02   0.03
  34   1    -0.15  -0.11  -0.03    -0.09   0.23   0.09     0.07  -0.42  -0.30
                    28                     29                     30
                     A                      A                      A
 Frequencies --   752.4124               792.3397               815.5082
 Red. masses --     2.5275                 3.2069                 1.1434
 Frc consts  --     0.8431                 1.1862                 0.4480
 IR Inten    --    17.8403                28.3791                 0.1139
 Atom AN      X      Y      Z        X      Y      Z        X      Y      Z
   1   6     0.04  -0.04  -0.01     0.11  -0.05  -0.10    -0.02   0.00   0.00
   2   6    -0.01  -0.01   0.04     0.04  -0.02   0.01    -0.01  -0.01   0.00
   3   6     0.16   0.10   0.10     0.20   0.07   0.11    -0.02   0.00  -0.01
   4   8    -0.06  -0.02  -0.01    -0.06  -0.03   0.01     0.01   0.00  -0.01
   5   8    -0.01  -0.03  -0.05     0.01  -0.04  -0.05     0.01   0.02   0.02
   6   6    -0.01   0.01   0.01    -0.04   0.02   0.02    -0.02  -0.03  -0.02
   7   6    -0.02   0.01  -0.02    -0.04   0.04  -0.05    -0.05  -0.05  -0.03
   8   6     0.01  -0.01   0.00    -0.03   0.03  -0.01     0.00  -0.01   0.00
   9   6    -0.02  -0.12  -0.09    -0.06   0.15   0.11     0.00  -0.01   0.00
  10   6    -0.04   0.03   0.09    -0.03  -0.08   0.01     0.01   0.01  -0.01
  11   6    -0.03  -0.04   0.04    -0.05  -0.05   0.07     0.01   0.01  -0.01
  12   6     0.04   0.10   0.07     0.08  -0.08  -0.05    -0.01   0.00   0.00
  13   6    -0.03   0.03  -0.06    -0.04   0.04  -0.07     0.01  -0.01   0.02
  14   1     0.03   0.00  -0.01     0.01   0.06  -0.01     0.00  -0.01   0.00
  15   6     0.00  -0.01   0.00    -0.01  -0.02  -0.03     0.00   0.01   0.01
  16   6    -0.04   0.11   0.00    -0.01  -0.01  -0.11     0.00  -0.01   0.01
  17   1    -0.01  -0.03  -0.06    -0.03  -0.04   0.18     0.00   0.00  -0.01
  18   1    -0.02   0.02   0.06    -0.02   0.02   0.14    -0.12   0.12   0.43
  19   1     0.03   0.02  -0.02     0.11   0.01  -0.07     0.37   0.10  -0.27
  20   1    -0.01   0.01   0.03    -0.05   0.04   0.13     0.14   0.11   0.07
  21   1     0.01   0.01   0.07    -0.01   0.04   0.14    -0.03   0.03   0.51
  22   1     0.02   0.09  -0.05     0.07   0.15  -0.13     0.35   0.21  -0.29
  23   6     0.01   0.00  -0.01    -0.03  -0.01   0.04     0.01   0.00  -0.01
  24   1     0.04  -0.11  -0.04     0.03  -0.09  -0.02     0.00   0.02   0.00
  25   1    -0.02  -0.44  -0.30    -0.20   0.27   0.23     0.03   0.00   0.00
  26   1     0.13  -0.36  -0.25    -0.01   0.36   0.26    -0.01  -0.01  -0.01
  27   1    -0.02  -0.44  -0.34    -0.22   0.35   0.22     0.03  -0.01   0.00
  28   1     0.01   0.01  -0.01    -0.02  -0.06   0.10     0.00   0.01  -0.01
  29   1     0.02   0.01  -0.02     0.00  -0.05   0.07     0.01   0.01  -0.02
  30   1     0.01   0.01   0.00     0.04   0.00  -0.03     0.00   0.00   0.00
  31   1    -0.01   0.02   0.03     0.01  -0.09  -0.07     0.00   0.01   0.01
  32   1    -0.02  -0.01  -0.01     0.02  -0.05  -0.04     0.00   0.02   0.01
  33   1    -0.02  -0.02  -0.02     0.03   0.02   0.03     0.00   0.00   0.00
  34   1     0.03  -0.08  -0.10     0.02   0.03  -0.05     0.00  -0.01   0.01
                    31                     32                     33
                     A                      A                      A
 Frequencies --   849.0585               855.8592               864.9648
 Red. masses --     2.8097                 1.3551                 4.0059
 Frc consts  --     1.1934                 0.5848                 1.7658
 IR Inten    --     3.2875                 0.9166                 8.0062
 Atom AN      X      Y      Z        X      Y      Z        X      Y      Z
   1   6    -0.08  -0.06  -0.04     0.02   0.01   0.01    -0.08  -0.02  -0.05
   2   6    -0.13  -0.04  -0.01     0.02   0.03  -0.01     0.11  -0.15   0.07
   3   6     0.09   0.11   0.08    -0.02  -0.05  -0.02     0.00   0.26   0.04
   4   8    -0.02  -0.02  -0.03     0.00   0.00   0.02     0.07   0.00  -0.17
   5   8    -0.03  -0.01  -0.02     0.02   0.00  -0.02    -0.15  -0.02   0.16
   6   6     0.02   0.00   0.00    -0.01   0.00   0.01     0.07  -0.01  -0.07
   7   6     0.01  -0.01   0.02     0.00   0.01  -0.01     0.01  -0.05   0.06
   8   6     0.01  -0.15   0.03     0.01   0.03  -0.01    -0.04   0.07  -0.02
   9   6    -0.02   0.04   0.03     0.01  -0.01  -0.01    -0.02   0.00  -0.01
  10   6     0.02   0.01  -0.05     0.00  -0.06  -0.02     0.02   0.01  -0.02
  11   6     0.04   0.01  -0.05     0.00  -0.07  -0.03     0.03   0.01  -0.04
  12   6    -0.02  -0.04  -0.02     0.01   0.00   0.00    -0.03  -0.01  -0.01
  13   6     0.02  -0.01   0.05    -0.02   0.07   0.03     0.02  -0.01   0.05
  14   1    -0.08  -0.20   0.03     0.00   0.02   0.00     0.26   0.25  -0.03
  15   6     0.03   0.08   0.15     0.00  -0.02  -0.03    -0.04  -0.02  -0.06
  16   6     0.01   0.02   0.04    -0.02   0.07   0.03     0.01   0.00   0.04
  17   1    -0.12  -0.03   0.03     0.00   0.02   0.00     0.17  -0.12   0.00
  18   1     0.00   0.00  -0.06    -0.02   0.01   0.02     0.12  -0.07  -0.14
  19   1    -0.06   0.00   0.04     0.00   0.01   0.00     0.05  -0.07  -0.05
  20   1     0.02  -0.02  -0.07     0.00   0.01   0.01     0.02  -0.04  -0.04
  21   1     0.01  -0.02  -0.04    -0.01   0.02   0.01     0.08  -0.11  -0.01
  22   1    -0.05  -0.02   0.05     0.01   0.01  -0.01     0.01  -0.09   0.06
  23   6     0.08   0.02  -0.15    -0.01   0.00   0.03    -0.06   0.01   0.04
  24   1     0.00   0.12   0.02    -0.09   0.35   0.27     0.01   0.10   0.04
  25   1     0.05   0.26   0.18    -0.11   0.40   0.30     0.04   0.15   0.09
  26   1    -0.06   0.16   0.12     0.00   0.03   0.03    -0.04   0.04   0.01
  27   1     0.09  -0.07  -0.02     0.05  -0.39  -0.28     0.11  -0.10  -0.05
  28   1     0.04   0.17  -0.20    -0.01  -0.02   0.01    -0.02  -0.20   0.27
  29   1     0.09   0.20  -0.33    -0.03  -0.04   0.06     0.05  -0.12   0.15
  30   1    -0.06   0.02   0.08    -0.01  -0.01   0.00     0.18   0.06  -0.19
  31   1    -0.01   0.24   0.12     0.00  -0.02   0.00     0.04  -0.26  -0.15
  32   1     0.00   0.32   0.24    -0.01  -0.06  -0.05     0.07  -0.15  -0.07
  33   1    -0.03  -0.02  -0.10    -0.01  -0.01   0.00     0.10   0.12   0.17
  34   1     0.05  -0.26  -0.15     0.08  -0.40  -0.28     0.04  -0.15  -0.06
                    34                     35                     36
                     A                      A                      A
 Frequencies --   880.7045               919.9219               935.2391
 Red. masses --     2.7482                 1.3649                 1.5134
 Frc consts  --     1.2559                 0.6805                 0.7799
 IR Inten    --     7.6921                 9.5012                 4.7437
 Atom AN      X      Y      Z        X      Y      Z        X      Y      Z
   1   6    -0.02   0.00  -0.10    -0.01   0.00   0.04    -0.02  -0.01   0.05
   2   6     0.02   0.01   0.03     0.02  -0.03  -0.13    -0.03  -0.01  -0.08
   3   6    -0.03   0.02   0.09     0.02   0.02   0.02     0.00   0.01  -0.01
   4   8    -0.03  -0.05   0.08     0.00  -0.01   0.00     0.00   0.00  -0.01
   5   8    -0.04   0.17  -0.16    -0.02   0.01   0.00    -0.01   0.00   0.01
   6   6     0.09  -0.10  -0.01     0.01  -0.01   0.00     0.00   0.00   0.00
   7   6     0.05  -0.12   0.09     0.00  -0.01   0.01     0.00   0.00   0.00
   8   6     0.01   0.03   0.00     0.00   0.00  -0.01     0.05   0.04  -0.01
   9   6    -0.01   0.01   0.00     0.00   0.01   0.01     0.01  -0.06  -0.04
  10   6     0.00   0.00   0.00     0.01  -0.03  -0.03    -0.01   0.06   0.03
  11   6     0.00   0.01  -0.01     0.01   0.00  -0.01     0.01   0.03   0.01
  12   6     0.00   0.00  -0.01    -0.01   0.04   0.04     0.01  -0.07  -0.04
  13   6     0.02  -0.01   0.01    -0.01   0.01   0.00     0.00  -0.02  -0.01
  14   1     0.05   0.05  -0.03     0.00   0.00   0.01     0.01   0.03   0.05
  15   6     0.00  -0.02  -0.04    -0.01   0.01   0.02     0.01   0.00  -0.03
  16   6     0.00  -0.01   0.02     0.01  -0.03  -0.04    -0.01   0.08   0.04
  17   1     0.04   0.02   0.01    -0.11   0.11   0.79    -0.14   0.04   0.42
  18   1    -0.25   0.17   0.06    -0.01   0.01   0.00     0.01   0.00  -0.01
  19   1    -0.18   0.22   0.09    -0.01   0.01   0.00     0.01   0.00  -0.01
  20   1     0.41   0.02  -0.62     0.02   0.00  -0.03     0.00   0.00   0.00
  21   1    -0.14   0.04   0.14    -0.01   0.00   0.01     0.00   0.00   0.00
  22   1    -0.12   0.05   0.14    -0.01   0.00   0.01     0.00   0.00   0.00
  23   6    -0.01   0.00   0.03     0.01  -0.01   0.03     0.02  -0.01   0.05
  24   1     0.00  -0.03  -0.02    -0.05   0.22   0.15     0.07  -0.31  -0.23
  25   1     0.01   0.00  -0.01     0.01   0.04   0.03     0.06  -0.13  -0.09
  26   1    -0.01   0.04   0.00     0.05  -0.27  -0.17    -0.09   0.36   0.29
  27   1     0.04   0.03   0.03    -0.01  -0.06  -0.04    -0.03   0.08   0.06
  28   1     0.00  -0.05   0.04     0.01   0.02  -0.10     0.02   0.06  -0.16
  29   1    -0.02  -0.06   0.09    -0.08  -0.02   0.05    -0.12  -0.03   0.08
  30   1     0.03   0.00  -0.05    -0.07  -0.05   0.05    -0.11  -0.07   0.11
  31   1     0.00  -0.03   0.00     0.02  -0.05  -0.07     0.00   0.01   0.06
  32   1    -0.01  -0.07  -0.06     0.06   0.04   0.06    -0.02  -0.11  -0.09
  33   1     0.00  -0.01   0.01     0.05   0.06   0.04    -0.01   0.01   0.05
  34   1     0.01  -0.02   0.01    -0.03   0.24   0.16     0.09  -0.38  -0.26
                    37                     38                     39
                     A                      A                      A
 Frequencies --   939.0382               953.9429               968.2203
 Red. masses --     1.1958                 2.5773                 1.5411
 Frc consts  --     0.6213                 1.3818                 0.8512
 IR Inten    --     0.5078                11.0482                 0.2580
 Atom AN      X      Y      Z        X      Y      Z        X      Y      Z
   1   6     0.00   0.00   0.01     0.14   0.05   0.03     0.00   0.00   0.01
   2   6     0.00   0.00  -0.02     0.13   0.02  -0.02     0.01   0.00  -0.04
   3   6     0.00   0.00   0.00    -0.06  -0.02  -0.04     0.00   0.00   0.00
   4   8     0.00   0.00   0.00     0.02   0.01  -0.01     0.00   0.00   0.00
   5   8     0.00   0.00   0.00    -0.04   0.04   0.04     0.00   0.00   0.00
   6   6     0.00   0.00   0.00     0.04  -0.03  -0.03     0.00   0.00   0.00
   7   6     0.00   0.00   0.00    -0.01  -0.01   0.03     0.00   0.00   0.00
   8   6    -0.01   0.01   0.05    -0.12  -0.10   0.00     0.02  -0.03  -0.11
   9   6     0.00  -0.01   0.00     0.09  -0.03  -0.02     0.00   0.00   0.00
  10   6     0.00   0.01   0.00    -0.01  -0.01   0.06     0.00   0.00   0.00
  11   6     0.00   0.00   0.00    -0.06  -0.04   0.06     0.00   0.00   0.00
  12   6     0.00  -0.01   0.00     0.01  -0.02  -0.02     0.00   0.00   0.00
  13   6     0.00   0.00   0.00    -0.05   0.04  -0.06     0.00   0.00   0.00
  14   1     0.05  -0.07  -0.33    -0.11  -0.08   0.03     0.06  -0.08  -0.38
  15   6     0.00  -0.08   0.04    -0.07   0.03   0.09     0.09   0.07   0.06
  16   6     0.00   0.01   0.00     0.00   0.05  -0.01     0.00   0.01   0.00
  17   1    -0.01   0.01   0.05     0.13   0.07   0.22    -0.01   0.02   0.11
  18   1     0.00   0.00   0.00    -0.02   0.02  -0.02     0.00   0.00   0.00
  19   1     0.00   0.00   0.00     0.01   0.03  -0.02     0.00   0.00   0.00
  20   1    -0.01   0.00   0.01     0.10   0.00  -0.14     0.00   0.00   0.00
  21   1     0.00   0.00   0.00    -0.05   0.02   0.05     0.00   0.00   0.00
  22   1     0.00   0.00   0.00    -0.04   0.02   0.05     0.00   0.00   0.00
  23   6    -0.01   0.08   0.00    -0.02  -0.02  -0.11    -0.11  -0.05   0.05
  24   1     0.01  -0.03  -0.02     0.00  -0.16  -0.03     0.00   0.00   0.00
  25   1     0.00  -0.02  -0.01    -0.11  -0.09  -0.02     0.00  -0.02  -0.01
  26   1    -0.01   0.04   0.03    -0.03   0.15   0.10     0.00   0.00   0.01
  27   1    -0.01   0.01   0.00    -0.10  -0.01  -0.06    -0.01   0.01   0.01
  28   1     0.07  -0.16  -0.10    -0.06  -0.03   0.26    -0.12  -0.20   0.52
  29   1    -0.09  -0.26   0.33     0.21   0.17  -0.30     0.20   0.01  -0.03
  30   1     0.15   0.02  -0.42     0.10   0.10  -0.01     0.17   0.08  -0.05
  31   1    -0.03   0.11  -0.17     0.04  -0.20  -0.28    -0.04   0.39   0.40
  32   1    -0.01   0.37   0.21     0.16   0.26   0.27    -0.17  -0.02  -0.08
  33   1    -0.02  -0.19  -0.41     0.14   0.16   0.08    -0.15  -0.10  -0.06
  34   1     0.01  -0.04  -0.03     0.02  -0.12  -0.14     0.01  -0.02  -0.02
                    40                     41                     42
                     A                      A                      A
 Frequencies --   978.2280               989.0268               999.8709
 Red. masses --     1.3500                 2.3990                 1.3348
 Frc consts  --     0.7612                 1.3826                 0.7863
 IR Inten    --     0.8126                14.3035                 0.0923
 Atom AN      X      Y      Z        X      Y      Z        X      Y      Z
   1   6     0.00   0.00   0.00     0.14  -0.09   0.04    -0.03   0.02   0.00
   2   6     0.01   0.00   0.01    -0.08   0.00   0.01     0.02   0.00   0.00
   3   6     0.00   0.00   0.00    -0.01   0.00  -0.06     0.00   0.00   0.01
   4   8     0.00   0.00   0.00     0.02   0.04  -0.06     0.00  -0.01   0.01
   5   8     0.00   0.00   0.00    -0.09   0.04   0.09     0.02   0.00  -0.02
   6   6     0.00   0.00   0.00     0.08  -0.04  -0.07    -0.02   0.01   0.02
   7   6     0.00   0.00   0.00    -0.06   0.01   0.07     0.02  -0.01  -0.02
   8   6     0.00   0.00   0.00     0.02   0.04   0.00     0.00  -0.01   0.00
   9   6     0.00   0.01   0.01     0.07   0.03   0.04    -0.01  -0.02  -0.02
  10   6     0.02  -0.07  -0.04     0.00  -0.01   0.02    -0.01   0.06   0.05
  11   6    -0.01   0.04   0.03    -0.03  -0.07   0.02     0.03  -0.07  -0.07
  12   6    -0.01   0.04   0.03    -0.02   0.03   0.03    -0.02   0.06   0.04
  13   6     0.02  -0.09  -0.06    -0.04   0.02  -0.08     0.02  -0.05  -0.01
  14   1     0.01   0.01   0.01    -0.18  -0.10  -0.01     0.04   0.02   0.00
  15   6    -0.01   0.00   0.00     0.06  -0.02  -0.01    -0.01   0.00   0.00
  16   6    -0.01   0.07   0.04     0.01   0.02  -0.04     0.00   0.02   0.01
  17   1     0.02   0.00  -0.02    -0.33  -0.25  -0.17     0.07   0.06   0.05
  18   1     0.00   0.00   0.00     0.02   0.01  -0.08    -0.01   0.00   0.02
  19   1     0.00   0.00   0.00     0.05   0.03  -0.07    -0.01  -0.01   0.02
  20   1    -0.01   0.00   0.01     0.15  -0.01  -0.21    -0.04   0.00   0.05
  21   1     0.00   0.00   0.00    -0.11   0.06   0.11     0.03  -0.02  -0.03
  22   1     0.00   0.00   0.00    -0.12   0.05   0.10     0.03  -0.02  -0.02
  23   6     0.00   0.00   0.00     0.04   0.00   0.03    -0.01   0.00  -0.01
  24   1    -0.08   0.37   0.28     0.01  -0.08  -0.02     0.09  -0.41  -0.29
  25   1     0.04  -0.21  -0.15    -0.10   0.17   0.19    -0.08   0.48   0.34
  26   1     0.04  -0.22  -0.15     0.03  -0.24  -0.13     0.07  -0.34  -0.26
  27   1    -0.11   0.49   0.35    -0.13   0.15   0.04    -0.04   0.25   0.19
  28   1     0.00   0.00   0.01     0.04   0.11  -0.23    -0.01  -0.03   0.06
  29   1     0.01   0.00  -0.01    -0.12  -0.01   0.04     0.03   0.00  -0.01
  30   1     0.01   0.00  -0.01    -0.13  -0.08   0.12     0.03   0.02  -0.03
  31   1     0.00  -0.02  -0.02    -0.03   0.23   0.20     0.01  -0.05  -0.05
  32   1     0.01   0.00   0.01    -0.12  -0.04  -0.09     0.03   0.01   0.02
  33   1     0.01   0.01   0.01    -0.12  -0.16  -0.15     0.03   0.04   0.03
  34   1     0.09  -0.39  -0.27    -0.01   0.07  -0.03     0.03  -0.15  -0.09
                    43                     44                     45
                     A                      A                      A
 Frequencies --  1017.2140              1043.4026              1056.7634
 Red. masses --     6.1389                 3.2124                 2.1430
 Frc consts  --     3.7425                 2.0605                 1.4100
 IR Inten    --     0.2578                81.3543                 8.7068
 Atom AN      X      Y      Z        X      Y      Z        X      Y      Z
   1   6     0.04   0.00   0.01     0.05  -0.03  -0.01     0.06  -0.02   0.01
   2   6     0.01   0.01  -0.01    -0.01  -0.02   0.00     0.01   0.00   0.00
   3   6     0.00  -0.01  -0.01    -0.04   0.03   0.00    -0.01   0.00  -0.01
   4   8     0.01   0.00  -0.01     0.01   0.01  -0.02     0.01   0.01  -0.01
   5   8    -0.01   0.00   0.02    -0.10   0.14  -0.02    -0.04   0.05   0.01
   6   6     0.02  -0.01  -0.02    -0.12   0.06   0.11    -0.03   0.01   0.02
   7   6    -0.03   0.02   0.02     0.22  -0.19  -0.08     0.06  -0.06  -0.01
   8   6     0.00   0.00  -0.01    -0.01   0.01   0.00    -0.01   0.01   0.00
   9   6     0.02   0.00   0.00     0.06   0.01   0.01     0.02   0.00   0.01
  10   6    -0.17   0.18  -0.30     0.02   0.02  -0.03    -0.05  -0.05   0.05
  11   6    -0.03  -0.04   0.04    -0.04  -0.06   0.08     0.02   0.10  -0.13
  12   6     0.38   0.04   0.06    -0.03   0.00   0.00     0.13   0.01   0.02
  13   6    -0.03   0.02  -0.06    -0.03   0.06  -0.09     0.00  -0.09   0.13
  14   1    -0.01  -0.01  -0.01    -0.07  -0.03   0.00    -0.07  -0.03   0.00
  15   6     0.00   0.00   0.01     0.02  -0.01   0.00     0.01  -0.01   0.00
  16   6    -0.20  -0.21   0.26     0.01  -0.02   0.03    -0.04   0.04  -0.06
  17   1    -0.02  -0.01   0.05    -0.12  -0.11  -0.01    -0.08  -0.07   0.01
  18   1     0.00   0.00  -0.03     0.02  -0.05   0.16     0.01  -0.02   0.04
  19   1     0.01   0.01  -0.02    -0.05  -0.11   0.11    -0.01  -0.03   0.02
  20   1     0.04   0.00  -0.06    -0.27   0.01   0.39    -0.06   0.00   0.09
  21   1    -0.04   0.03   0.03     0.29  -0.25  -0.20     0.07  -0.07  -0.04
  22   1    -0.05   0.03   0.03     0.35  -0.21  -0.16     0.09  -0.05  -0.03
  23   6     0.00   0.00   0.00     0.01   0.00   0.00     0.01  -0.01   0.00
  24   1    -0.16   0.19  -0.33     0.10   0.09  -0.03    -0.34  -0.16   0.15
  25   1    -0.02  -0.01   0.05     0.06  -0.10   0.13    -0.30   0.18  -0.34
  26   1     0.40   0.00   0.04    -0.04   0.00  -0.01     0.15   0.01   0.03
  27   1    -0.04   0.07   0.00     0.08   0.10  -0.13    -0.36  -0.25   0.25
  28   1     0.00   0.00   0.01     0.01   0.04  -0.06     0.00   0.02  -0.01
  29   1     0.01   0.01  -0.01    -0.03   0.01  -0.01     0.00   0.02  -0.02
  30   1     0.00   0.00   0.01    -0.04  -0.02   0.04    -0.02  -0.01   0.03
  31   1     0.00   0.00  -0.02    -0.01   0.06   0.05     0.00   0.03   0.01
  32   1     0.01   0.02   0.02    -0.03  -0.01  -0.02    -0.02   0.02   0.01
  33   1     0.01   0.00  -0.01    -0.03  -0.04  -0.04    -0.02  -0.03  -0.03
  34   1    -0.14  -0.30   0.25     0.09  -0.01   0.09    -0.32   0.10  -0.24
                    46                     47                     48
                     A                      A                      A
 Frequencies --  1106.0552              1116.5189              1139.3569
 Red. masses --     1.6072                 2.2933                 2.1590
 Frc consts  --     1.1585                 1.6844                 1.6513
 IR Inten    --     4.9703                 4.7580                12.3051
 Atom AN      X      Y      Z        X      Y      Z        X      Y      Z
   1   6     0.00   0.00   0.02    -0.01   0.00   0.02     0.00   0.00   0.01
   2   6     0.00  -0.02   0.00     0.01  -0.01  -0.08     0.00  -0.01   0.00
   3   6     0.01   0.00   0.00     0.00   0.00   0.00    -0.02   0.02   0.00
   4   8     0.00   0.00   0.00     0.00   0.00   0.00     0.02   0.01  -0.04
   5   8     0.00   0.00   0.00     0.00   0.00   0.00    -0.01  -0.05   0.08
   6   6     0.00   0.00   0.00     0.00   0.00   0.00     0.00  -0.12   0.15
   7   6     0.00   0.00   0.00     0.00   0.00   0.00     0.04   0.10  -0.20
   8   6    -0.01   0.00  -0.01    -0.04   0.05   0.26    -0.01   0.01   0.00
   9   6     0.00   0.04  -0.05     0.00   0.00   0.00     0.01   0.00   0.00
  10   6     0.10  -0.02   0.05     0.00   0.00   0.00     0.00   0.00   0.00
  11   6    -0.06  -0.04   0.04     0.00   0.00   0.00     0.00   0.00   0.00
  12   6     0.01   0.06  -0.07     0.00   0.00   0.00     0.00   0.00   0.00
  13   6     0.05  -0.03   0.06     0.00   0.00   0.00     0.00   0.00   0.00
  14   1    -0.03  -0.01  -0.02    -0.06   0.09   0.43    -0.03  -0.01   0.00
  15   6     0.00   0.00   0.00     0.08  -0.07  -0.09     0.01   0.00   0.00
  16   6    -0.11  -0.04   0.02     0.00   0.00   0.00     0.00   0.00   0.00
  17   1    -0.06  -0.05   0.06    -0.03   0.03   0.20    -0.04  -0.05   0.00
  18   1     0.00   0.00   0.00     0.00   0.00   0.00    -0.44   0.22   0.19
  19   1     0.00   0.00   0.00     0.00   0.00   0.00    -0.35   0.31   0.28
  20   1     0.00   0.00   0.00     0.00   0.00   0.00     0.27  -0.01  -0.40
  21   1    -0.01   0.00   0.00     0.00   0.00   0.00     0.08   0.07  -0.18
  22   1    -0.01   0.01   0.00     0.00   0.00   0.00     0.05   0.08  -0.20
  23   6     0.01   0.00   0.01    -0.05   0.03  -0.13     0.00   0.00   0.00
  24   1     0.43   0.13  -0.05     0.01   0.01   0.00    -0.01   0.00   0.00
  25   1    -0.26   0.00  -0.07     0.00   0.00   0.00    -0.01   0.00   0.00
  26   1     0.03   0.35  -0.48     0.00   0.01  -0.01     0.00   0.00   0.00
  27   1     0.26   0.06   0.00     0.01   0.00   0.00    -0.01   0.00   0.00
  28   1     0.01   0.02  -0.03    -0.06  -0.06   0.28     0.00   0.01  -0.01
  29   1    -0.02   0.00   0.00     0.25   0.11  -0.22    -0.01   0.00   0.00
  30   1    -0.02  -0.02   0.02     0.23   0.18  -0.18    -0.01  -0.01   0.01
  31   1     0.00   0.02   0.01    -0.02   0.15   0.23     0.00   0.02   0.01
  32   1    -0.01   0.01   0.00    -0.17  -0.22  -0.24    -0.01   0.00   0.00
  33   1    -0.01  -0.01  -0.01    -0.17  -0.24  -0.14    -0.01  -0.02  -0.02
  34   1    -0.44   0.02  -0.19     0.00   0.00   0.00    -0.01   0.00  -0.01
                    49                     50                     51
                     A                      A                      A
 Frequencies --  1174.7132              1183.3817              1185.4321
 Red. masses --     2.1336                 1.5548                 1.1278
 Frc consts  --     1.7347                 1.2828                 0.9337
 IR Inten    --    47.7084                 4.3142                 3.4920
 Atom AN      X      Y      Z        X      Y      Z        X      Y      Z
   1   6     0.00   0.02  -0.01     0.00   0.00   0.00     0.00   0.00   0.00
   2   6     0.12  -0.03   0.02     0.00   0.00   0.00     0.00   0.01   0.00
   3   6    -0.06   0.05   0.03     0.00  -0.01  -0.01     0.01  -0.01  -0.01
   4   8     0.01  -0.01   0.00     0.00   0.00   0.00     0.00   0.00   0.00
   5   8     0.04  -0.02  -0.03     0.03   0.03   0.02    -0.01   0.00   0.00
   6   6     0.00   0.00  -0.01     0.08   0.07   0.05     0.00   0.00   0.00
   7   6    -0.01   0.01   0.01    -0.12  -0.11  -0.08     0.00   0.00   0.00
   8   6    -0.06   0.19  -0.04     0.00   0.01   0.00     0.01   0.00   0.00
   9   6    -0.08  -0.01  -0.03    -0.01   0.00   0.00    -0.01   0.00   0.00
  10   6    -0.02   0.00   0.00     0.00   0.00   0.00     0.01   0.01  -0.01
  11   6     0.03   0.01  -0.01     0.00   0.00   0.00    -0.04   0.01  -0.03
  12   6    -0.01   0.00   0.00     0.00   0.00   0.00     0.00  -0.04   0.05
  13   6     0.02  -0.01   0.01     0.00   0.00   0.00     0.05   0.02  -0.01
  14   1    -0.32   0.01  -0.06     0.01   0.01   0.00     0.02   0.01   0.00
  15   6     0.02  -0.09   0.05     0.00   0.00   0.00     0.00   0.00   0.00
  16   6     0.00   0.00   0.01     0.00   0.00   0.00    -0.01   0.00  -0.01
  17   1    -0.13  -0.21   0.04     0.00   0.00   0.00     0.00   0.01   0.01
  18   1     0.01  -0.01   0.00     0.14  -0.05  -0.39     0.00   0.00   0.01
  19   1     0.03  -0.01  -0.02    -0.27  -0.09   0.28     0.00   0.00  -0.01
  20   1    -0.01   0.01   0.03    -0.18  -0.15  -0.11     0.01   0.00   0.00
  21   1     0.02  -0.02  -0.02     0.22  -0.30   0.36    -0.01   0.01  -0.01
  22   1     0.03  -0.05   0.01    -0.05   0.47  -0.22     0.00  -0.01   0.01
  23   6     0.03  -0.11   0.00     0.00  -0.01   0.00     0.00   0.00   0.00
  24   1     0.02   0.01  -0.01     0.01   0.01   0.00     0.15   0.07  -0.05
  25   1     0.09   0.00   0.03    -0.01   0.00  -0.01    -0.38   0.10  -0.24
  26   1    -0.01  -0.02   0.03     0.00  -0.01   0.01    -0.03  -0.39   0.52
  27   1     0.09   0.02  -0.01     0.02   0.01   0.00     0.47   0.20  -0.14
  28   1    -0.06   0.21   0.05     0.00   0.01   0.01    -0.01   0.00   0.02
  29   1    -0.01   0.19  -0.27     0.00   0.01  -0.01     0.01   0.01  -0.01
  30   1    -0.16  -0.06   0.41     0.00   0.00   0.02     0.01   0.00   0.01
  31   1    -0.03   0.16  -0.14     0.00   0.00  -0.01     0.00  -0.01  -0.02
  32   1    -0.08   0.26   0.15     0.00   0.01   0.01     0.01   0.01   0.01
  33   1    -0.03  -0.22  -0.37     0.00  -0.01  -0.02     0.01   0.00  -0.01
  34   1     0.10  -0.04   0.07     0.01   0.00   0.00    -0.16   0.03  -0.11
                    52                     53                     54
                     A                      A                      A
 Frequencies --  1193.5270              1207.5259              1214.1553
 Red. masses --     2.5711                 1.8373                 1.5087
 Frc consts  --     2.1579                 1.5784                 1.3104
 IR Inten    --   234.2861                88.8278                65.1929
 Atom AN      X      Y      Z        X      Y      Z        X      Y      Z
   1   6     0.02  -0.03   0.02    -0.03  -0.01  -0.01     0.02   0.00   0.01
   2   6    -0.09   0.06  -0.03    -0.10   0.00  -0.01     0.05   0.01   0.00
   3   6     0.16  -0.12  -0.08    -0.09   0.06   0.04     0.08  -0.06  -0.03
   4   8    -0.02   0.02   0.00     0.01  -0.01   0.00    -0.01   0.01   0.00
   5   8    -0.10   0.06   0.07     0.05  -0.03  -0.03    -0.05   0.03   0.03
   6   6     0.00  -0.01   0.00     0.00   0.00   0.00     0.00   0.00   0.00
   7   6     0.03  -0.02  -0.01    -0.01   0.01   0.00     0.01  -0.01   0.00
   8   6     0.13   0.08   0.00     0.12   0.04   0.01    -0.05  -0.02  -0.01
   9   6    -0.09  -0.01   0.01     0.12   0.01   0.03    -0.08  -0.01  -0.01
  10   6     0.01   0.01  -0.01    -0.02  -0.01   0.01    -0.07  -0.02   0.01
  11   6     0.02   0.02  -0.02     0.00  -0.03   0.03     0.07   0.00   0.01
  12   6    -0.01   0.00  -0.01     0.02   0.00   0.00     0.00   0.00   0.00
  13   6     0.01  -0.01   0.02     0.00   0.02  -0.03     0.06   0.01   0.00
  14   1     0.40   0.27   0.04     0.34   0.18   0.00    -0.14  -0.07   0.00
  15   6    -0.06  -0.07   0.04    -0.04  -0.03   0.01     0.02   0.01   0.00
  16   6     0.00   0.00   0.00    -0.02   0.01  -0.02    -0.05   0.01  -0.03
  17   1     0.02   0.14  -0.07    -0.22  -0.10  -0.01     0.13   0.07   0.01
  18   1    -0.03   0.01   0.04     0.01   0.00  -0.01     0.00   0.00   0.01
  19   1     0.00   0.01   0.00     0.01   0.00  -0.01     0.00   0.00   0.00
  20   1     0.03   0.01  -0.03    -0.01   0.00   0.01     0.01   0.00  -0.01
  21   1    -0.08   0.08  -0.01     0.05  -0.05  -0.01    -0.04   0.03   0.01
  22   1    -0.06   0.05   0.03     0.05  -0.04  -0.01    -0.04   0.03   0.01
  23   6    -0.05  -0.08  -0.02    -0.03  -0.04  -0.01     0.01   0.02   0.00
  24   1     0.20   0.11  -0.07    -0.40  -0.18   0.14    -0.35  -0.15   0.10
  25   1     0.07   0.01   0.01     0.18  -0.07   0.15     0.50  -0.10   0.28
  26   1    -0.01   0.07  -0.10     0.02   0.02  -0.02     0.01   0.02  -0.03
  27   1    -0.09  -0.06   0.06     0.17   0.10  -0.09     0.44   0.18  -0.12
  28   1    -0.10   0.00   0.29    -0.05  -0.02   0.17     0.02   0.01  -0.06
  29   1     0.18   0.12  -0.21     0.12   0.05  -0.10    -0.05  -0.02   0.04
  30   1     0.08   0.07   0.16     0.06   0.05   0.09    -0.02  -0.02  -0.04
  31   1     0.00  -0.10  -0.28     0.00  -0.09  -0.15     0.00   0.03   0.05
  32   1     0.10   0.21   0.20     0.09   0.09   0.11    -0.03  -0.03  -0.04
  33   1     0.13  -0.01  -0.18     0.09   0.03  -0.07    -0.03  -0.01   0.02
  34   1     0.15  -0.03   0.10    -0.41   0.12  -0.26    -0.32   0.06  -0.21
                    55                     56                     57
                     A                      A                      A
 Frequencies --  1273.4032              1308.4639              1315.4268
 Red. masses --     2.6192                 1.0969                 3.9965
 Frc consts  --     2.5024                 1.1065                 4.0744
 IR Inten    --    57.4840                 1.5580                 8.6263
 Atom AN      X      Y      Z        X      Y      Z        X      Y      Z
   1   6     0.20  -0.03   0.03     0.00   0.00   0.00     0.01  -0.04  -0.02
   2   6     0.00   0.06  -0.01     0.00   0.00   0.00     0.02   0.02   0.01
   3   6    -0.12   0.07   0.03     0.00   0.00   0.00    -0.05   0.02   0.01
   4   8     0.02   0.00  -0.01     0.00   0.00   0.00     0.01   0.00   0.00
   5   8     0.03  -0.01  -0.02     0.02   0.02   0.02     0.01   0.00  -0.01
   6   6     0.00   0.00   0.00    -0.05  -0.05  -0.04     0.00   0.00   0.00
   7   6    -0.01   0.01   0.01     0.01   0.01   0.01    -0.01   0.00   0.00
   8   6     0.11  -0.07   0.04     0.00   0.00   0.00    -0.03   0.02  -0.01
   9   6    -0.20  -0.03  -0.01     0.00   0.00   0.00    -0.02  -0.21   0.27
  10   6    -0.03  -0.01   0.00     0.00   0.00   0.00     0.13   0.09  -0.08
  11   6     0.04   0.03  -0.03     0.00   0.00   0.00    -0.14   0.05  -0.10
  12   6    -0.01   0.00   0.00     0.00   0.00   0.00    -0.01  -0.09   0.12
  13   6     0.04  -0.02   0.04     0.00   0.00   0.00     0.15   0.08  -0.07
  14   1    -0.12  -0.24  -0.04     0.02   0.01   0.00    -0.06   0.02   0.04
  15   6    -0.05   0.04  -0.02     0.00   0.00   0.00     0.01  -0.01   0.00
  16   6    -0.03   0.01  -0.02     0.00   0.00   0.00    -0.12   0.05  -0.11
  17   1    -0.54  -0.36   0.01     0.01   0.01   0.00     0.30   0.24  -0.01
  18   1     0.00   0.00   0.00    -0.08   0.01   0.21     0.00   0.00  -0.01
  19   1     0.01   0.01  -0.01     0.14   0.04  -0.17     0.00   0.00   0.00
  20   1     0.01   0.00   0.00     0.07   0.06   0.05     0.00   0.00   0.00
  21   1     0.08  -0.07  -0.03     0.49  -0.40  -0.20     0.03  -0.03  -0.01
  22   1     0.07  -0.07  -0.02    -0.48   0.41   0.20     0.05  -0.04  -0.02
  23   6    -0.05   0.03  -0.02     0.00   0.00   0.00     0.01   0.00   0.00
  24   1     0.23   0.13  -0.08     0.00   0.00   0.00     0.28   0.15  -0.13
  25   1     0.20   0.00   0.06     0.00   0.00   0.00     0.33  -0.06   0.18
  26   1    -0.01   0.01  -0.02     0.00   0.00   0.00     0.01   0.11  -0.16
  27   1     0.15   0.03   0.01     0.00   0.00   0.00    -0.35  -0.13   0.10
  28   1    -0.01  -0.12   0.10     0.00   0.00   0.00     0.00   0.03  -0.01
  29   1     0.11  -0.06   0.06     0.00   0.00   0.00    -0.03   0.01   0.00
  30   1     0.10   0.07  -0.11     0.00   0.00   0.00    -0.01  -0.01   0.01
  31   1     0.01  -0.17  -0.04     0.00   0.00   0.00     0.00   0.04   0.00
  32   1     0.13  -0.08   0.00     0.00   0.00   0.00    -0.04   0.02   0.00
  33   1     0.06   0.14   0.14     0.00   0.00   0.00    -0.01  -0.03  -0.02
  34   1     0.14  -0.03   0.10     0.00   0.00   0.00    -0.25   0.08  -0.20
                    58                     59                     60
                     A                      A                      A
 Frequencies --  1344.0954              1359.8755              1364.0997
 Red. masses --     1.3235                 1.6695                 1.4851
 Frc consts  --     1.4087                 1.8190                 1.6281
 IR Inten    --     2.9919                27.1311                21.9891
 Atom AN      X      Y      Z        X      Y      Z        X      Y      Z
   1   6     0.01   0.01   0.00    -0.09   0.06  -0.02     0.08  -0.03   0.02
   2   6     0.00   0.00   0.01     0.04  -0.02   0.01    -0.04   0.01  -0.01
   3   6    -0.01   0.01   0.00     0.07  -0.03  -0.02    -0.04   0.01   0.01
   4   8     0.00   0.00   0.00    -0.01   0.00   0.00     0.01   0.00  -0.01
   5   8     0.00   0.00   0.00    -0.01   0.00   0.02     0.01   0.00  -0.01
   6   6     0.00   0.00   0.00     0.00   0.01  -0.01     0.00   0.00   0.01
   7   6     0.00   0.00   0.00     0.02  -0.01  -0.02    -0.02   0.01   0.01
   8   6     0.02  -0.03  -0.14     0.08   0.02   0.01    -0.07  -0.03  -0.01
   9   6     0.00   0.00   0.00     0.04   0.00   0.00    -0.03   0.03  -0.04
  10   6     0.00   0.00   0.00     0.09   0.03  -0.01     0.06   0.02  -0.01
  11   6     0.00   0.00   0.00    -0.04   0.00  -0.01    -0.01   0.00  -0.01
  12   6     0.00   0.00   0.00     0.00  -0.05   0.07     0.00  -0.05   0.06
  13   6     0.00   0.00   0.00     0.03   0.02  -0.01     0.02  -0.01   0.02
  14   1    -0.14   0.17   0.89    -0.42  -0.31   0.00     0.39   0.28   0.02
  15   6     0.02  -0.04   0.04    -0.03   0.02   0.00     0.03  -0.01   0.00
  16   6     0.00   0.00   0.00    -0.07   0.01  -0.03    -0.09   0.01  -0.04
  17   1    -0.05  -0.04   0.01    -0.30  -0.30  -0.01     0.14   0.15   0.01
  18   1     0.00   0.00   0.00     0.01   0.00   0.03     0.00   0.00  -0.03
  19   1     0.00   0.00   0.00    -0.01  -0.02   0.01     0.01   0.01  -0.01
  20   1     0.00   0.00   0.00    -0.02   0.00   0.03     0.01   0.00  -0.02
  21   1     0.02  -0.02  -0.01    -0.09   0.09   0.05     0.07  -0.07  -0.04
  22   1     0.02  -0.01   0.00    -0.13   0.10   0.05     0.10  -0.08  -0.04
  23   6    -0.04   0.05   0.01    -0.03   0.01  -0.01     0.03  -0.01   0.01
  24   1     0.01   0.01   0.00    -0.38  -0.19   0.13    -0.35  -0.17   0.13
  25   1     0.00   0.00   0.00    -0.15   0.02  -0.07    -0.16   0.04  -0.10
  26   1     0.00   0.00   0.01     0.01   0.12  -0.17     0.02   0.16  -0.21
  27   1     0.00   0.00   0.00     0.08   0.04  -0.03     0.26   0.10  -0.06
  28   1     0.01  -0.15   0.05    -0.02  -0.06   0.08     0.02   0.04  -0.07
  29   1     0.01  -0.08   0.13     0.08  -0.05   0.04    -0.06   0.04  -0.03
  30   1     0.01   0.02  -0.14     0.05   0.05  -0.02    -0.04  -0.05   0.00
  31   1    -0.01   0.15  -0.02     0.01  -0.09  -0.06     0.00   0.07   0.05
  32   1    -0.04   0.12   0.08     0.08  -0.06   0.01    -0.06   0.05   0.00
  33   1     0.03  -0.07  -0.12     0.04   0.05  -0.01    -0.03  -0.04   0.01
  34   1    -0.01   0.00   0.00     0.27  -0.07   0.18     0.41  -0.11   0.27
                    61                     62                     63
                     A                      A                      A
 Frequencies --  1393.0914              1408.3771              1409.4820
 Red. masses --     1.3934                 1.2840                 1.2949
 Frc consts  --     1.5933                 1.5006                 1.5157
 IR Inten    --    11.3728                 8.6482                 5.5340
 Atom AN      X      Y      Z        X      Y      Z        X      Y      Z
   1   6     0.00   0.12  -0.02    -0.02   0.04  -0.01     0.03  -0.04   0.01
   2   6     0.03  -0.01   0.00     0.02   0.00   0.00    -0.02   0.00   0.00
   3   6     0.01  -0.01  -0.02     0.04  -0.03  -0.01    -0.04   0.04   0.01
   4   8     0.00  -0.01   0.02    -0.01   0.00   0.01     0.01   0.00   0.00
   5   8     0.00  -0.01   0.01    -0.01   0.02  -0.01     0.01  -0.02   0.00
   6   6     0.00   0.01  -0.02    -0.02  -0.01   0.04     0.03   0.01  -0.05
   7   6     0.04  -0.03  -0.03    -0.05   0.03   0.04     0.05  -0.03  -0.04
   8   6    -0.08  -0.06   0.00    -0.01  -0.01   0.00     0.01   0.01  -0.01
   9   6    -0.01  -0.02   0.01     0.01   0.00   0.00    -0.01   0.00   0.00
  10   6     0.00   0.00   0.00     0.00   0.00   0.00     0.00   0.00   0.00
  11   6    -0.02   0.01  -0.02    -0.01   0.00   0.00     0.01   0.00   0.00
  12   6     0.00   0.00   0.00     0.00   0.00   0.00     0.00   0.00   0.00
  13   6     0.03   0.01  -0.01     0.01   0.00   0.00    -0.01  -0.01   0.00
  14   1     0.49   0.31   0.00     0.07   0.04   0.00    -0.07  -0.03   0.03
  15   6     0.03   0.01   0.01     0.01   0.05   0.06     0.00   0.03   0.04
  16   6    -0.01   0.00   0.00     0.00   0.00   0.00     0.00   0.00   0.00
  17   1    -0.45  -0.39   0.00    -0.16  -0.14   0.00     0.16   0.15   0.01
  18   1     0.00   0.03   0.08     0.05  -0.09  -0.18    -0.07   0.11   0.20
  19   1    -0.07  -0.03   0.04     0.19   0.02  -0.09    -0.21  -0.02   0.10
  20   1    -0.06  -0.01   0.10     0.12   0.03  -0.23    -0.13  -0.04   0.25
  21   1    -0.19   0.18   0.12     0.22  -0.20  -0.16    -0.21   0.20   0.16
  22   1    -0.22   0.13   0.09     0.27  -0.15  -0.12    -0.27   0.14   0.12
  23   6     0.03   0.00   0.00    -0.02  -0.02   0.06    -0.04  -0.03   0.07
  24   1     0.06   0.02  -0.02     0.01   0.00   0.00    -0.01   0.00   0.00
  25   1     0.10  -0.02   0.06     0.02  -0.01   0.02    -0.03   0.01  -0.02
  26   1     0.00  -0.05   0.06     0.00  -0.02   0.03     0.00   0.02  -0.03
  27   1    -0.09  -0.04   0.03    -0.04  -0.02   0.01     0.05   0.02  -0.01
  28   1     0.03  -0.02  -0.01     0.01   0.04  -0.28    -0.01   0.08  -0.32
  29   1    -0.07   0.01   0.00     0.12   0.20  -0.18     0.16   0.23  -0.20
  30   1    -0.10  -0.07   0.02     0.15  -0.01  -0.24     0.22   0.02  -0.28
  31   1     0.03  -0.02   0.03     0.10  -0.19  -0.22     0.06  -0.11  -0.19
  32   1    -0.07  -0.01  -0.03    -0.09  -0.27  -0.13    -0.06  -0.20  -0.09
  33   1    -0.10  -0.08  -0.02    -0.12  -0.12  -0.27    -0.05  -0.07  -0.21
  34   1    -0.03   0.00  -0.01    -0.02   0.00  -0.01     0.02   0.00   0.01
                    64                     65                     66
                     A                      A                      A
 Frequencies --  1430.8683              1436.0183              1479.4979
 Red. masses --     1.2289                 1.3880                 2.1757
 Frc consts  --     1.4824                 1.6864                 2.8059
 IR Inten    --     1.8772                 9.9708                 7.3769
 Atom AN      X      Y      Z        X      Y      Z        X      Y      Z
   1   6     0.00  -0.03   0.01    -0.02   0.03  -0.01     0.03  -0.02   0.02
   2   6    -0.01   0.01   0.00     0.01   0.00   0.00    -0.03  -0.02   0.00
   3   6    -0.01   0.00   0.00     0.04  -0.03  -0.01    -0.01   0.00   0.01
   4   8     0.00   0.00   0.00     0.00   0.00   0.00     0.00   0.01  -0.01
   5   8     0.00   0.00   0.00    -0.01   0.02  -0.01     0.00   0.00   0.00
   6   6     0.02   0.00  -0.02     0.10  -0.04  -0.09     0.00   0.00   0.00
   7   6     0.00   0.00   0.00    -0.07   0.03   0.06     0.00   0.00   0.00
   8   6     0.00   0.00   0.00     0.00   0.00   0.00     0.01   0.01   0.00
   9   6     0.00   0.00   0.00     0.00   0.00   0.00     0.00   0.09  -0.12
  10   6     0.00   0.00   0.00     0.00   0.00   0.00     0.08  -0.03   0.06
  11   6     0.01   0.00   0.00    -0.01   0.00   0.00    -0.15  -0.01  -0.03
  12   6     0.00   0.00   0.00     0.00   0.00   0.00     0.01   0.06  -0.09
  13   6    -0.01   0.00   0.00     0.01   0.00   0.00     0.15   0.02   0.02
  14   1     0.00  -0.01   0.00     0.01   0.00  -0.02    -0.05  -0.03   0.01
  15   6     0.01   0.07   0.07     0.00  -0.01  -0.01     0.00   0.00   0.01
  16   6     0.00   0.00   0.00     0.00   0.00   0.00    -0.10  -0.04   0.03
  17   1     0.07   0.08   0.00    -0.08  -0.08   0.00     0.11   0.10   0.03
  18   1    -0.04   0.05   0.06    -0.27   0.28   0.26     0.01  -0.01   0.00
  19   1    -0.08   0.02   0.04    -0.40   0.17   0.17     0.00  -0.01   0.00
  20   1    -0.04  -0.02   0.08    -0.19  -0.13   0.44     0.00   0.00  -0.01
  21   1     0.01  -0.01   0.00     0.22  -0.22  -0.15    -0.01   0.01   0.01
  22   1     0.01  -0.01   0.00     0.29  -0.16  -0.11    -0.02   0.00   0.01
  23   6     0.03   0.03  -0.08     0.00   0.00   0.01     0.00   0.00  -0.01
  24   1     0.00   0.00   0.00     0.00  -0.01   0.00    -0.10  -0.12   0.13
  25   1    -0.03   0.01  -0.02     0.02  -0.01   0.01     0.34  -0.14   0.28
  26   1     0.00   0.02  -0.03     0.00  -0.02   0.02    -0.03  -0.36   0.49
  27   1     0.03   0.01  -0.01    -0.03  -0.01   0.01    -0.33  -0.19   0.19
  28   1     0.02  -0.10   0.35     0.00   0.00  -0.03     0.00   0.01   0.01
  29   1    -0.15  -0.25   0.22     0.01   0.03  -0.03     0.00  -0.03   0.02
  30   1    -0.23  -0.01   0.29     0.01  -0.01  -0.03     0.01   0.02   0.03
  31   1     0.13  -0.26  -0.30    -0.02   0.03   0.06     0.00   0.02  -0.03
  32   1    -0.11  -0.37  -0.16     0.02   0.06   0.03     0.01  -0.06  -0.01
  33   1    -0.16  -0.15  -0.36     0.02   0.02   0.06     0.04   0.02  -0.05
  34   1     0.01   0.00   0.00    -0.01   0.00   0.00     0.10  -0.10   0.16
                    67                     68                     69
                     A                      A                      A
 Frequencies --  1503.3952              1504.1999              1506.0697
 Red. masses --     1.0404                 1.0442                 1.0418
 Frc consts  --     1.3855                 1.3920                 1.3922
 IR Inten    --     5.6606                 2.8837                 3.9401
 Atom AN      X      Y      Z        X      Y      Z        X      Y      Z
   1   6     0.00   0.00   0.00     0.00   0.00   0.00     0.00   0.00   0.00
   2   6     0.00   0.00   0.00     0.00   0.00   0.00     0.00   0.00   0.00
   3   6     0.00   0.00   0.00     0.00   0.00   0.00     0.00   0.00   0.00
   4   8     0.00   0.00   0.00     0.00   0.00   0.00     0.00   0.00   0.00
   5   8     0.00   0.00   0.00     0.00   0.00   0.00     0.00   0.00   0.00
   6   6    -0.02  -0.02  -0.02    -0.02  -0.02  -0.01    -0.01  -0.01   0.00
   7   6    -0.01  -0.01  -0.01    -0.01  -0.01  -0.01     0.00   0.00   0.00
   8   6     0.00   0.00  -0.01     0.00   0.00   0.01     0.00   0.00  -0.02
   9   6     0.00   0.00   0.00     0.00   0.00   0.00     0.00   0.00   0.00
  10   6     0.00   0.00   0.00     0.00   0.00   0.00     0.00   0.00   0.00
  11   6     0.00   0.00   0.00     0.00   0.00   0.00     0.00   0.00   0.00
  12   6     0.00   0.00   0.00     0.00   0.00   0.00     0.00   0.00   0.00
  13   6     0.00   0.00   0.00     0.00   0.00   0.00     0.00   0.00   0.00
  14   1     0.00   0.00   0.00     0.00   0.00  -0.02    -0.01   0.02   0.08
  15   6     0.02   0.00   0.00    -0.03  -0.01   0.01    -0.01   0.03  -0.02
  16   6     0.00   0.00   0.00     0.00   0.00   0.00     0.00   0.00   0.00
  17   1     0.00   0.00   0.00     0.00   0.00   0.00     0.00   0.00   0.00
  18   1     0.31  -0.26  -0.03     0.21  -0.19  -0.06     0.06  -0.06  -0.02
  19   1    -0.26   0.28   0.08    -0.17   0.24   0.05    -0.05   0.08   0.01
  20   1     0.38   0.32   0.24     0.27   0.24   0.20     0.08   0.07   0.06
  21   1    -0.02  -0.01   0.02     0.00  -0.01   0.04     0.00   0.00   0.02
  22   1     0.02   0.02  -0.04     0.00  -0.01  -0.01     0.00  -0.01   0.00
  23   6    -0.02   0.00  -0.01     0.03   0.01   0.01     0.01  -0.03   0.00
  24   1     0.00   0.00   0.00     0.00   0.00   0.00     0.00   0.00   0.00
  25   1     0.00   0.00   0.00     0.00   0.00   0.00     0.00   0.00   0.00
  26   1     0.00   0.00   0.00     0.00   0.00  -0.01     0.00   0.00   0.00
  27   1     0.00   0.00   0.00     0.00   0.00   0.00     0.00   0.00   0.00
  28   1    -0.01   0.03  -0.17     0.05  -0.18   0.16    -0.13   0.42   0.16
  29   1     0.22  -0.15   0.11    -0.17   0.20  -0.16    -0.36  -0.02   0.03
  30   1     0.11   0.15   0.20    -0.23  -0.23  -0.22     0.26   0.09  -0.13
  31   1     0.05  -0.09  -0.13    -0.09   0.22   0.08     0.04  -0.34   0.37
  32   1    -0.23   0.17  -0.03     0.22  -0.25   0.00     0.36   0.07   0.15
  33   1    -0.17  -0.06   0.20     0.31   0.14  -0.23    -0.23  -0.16  -0.17
  34   1     0.00   0.00   0.00     0.00   0.00   0.00     0.00   0.00   0.00
                    70                     71                     72
                     A                      A                      A
 Frequencies --  1511.6338              1518.3994              1526.5439
 Red. masses --     1.0483                 1.0521                 1.1010
 Frc consts  --     1.4113                 1.4292                 1.5116
 IR Inten    --     3.2547                 6.7253                19.9364
 Atom AN      X      Y      Z        X      Y      Z        X      Y      Z
   1   6     0.00   0.00   0.00     0.00   0.02   0.00     0.00   0.01   0.00
   2   6     0.00   0.00   0.00     0.00  -0.01   0.00     0.00  -0.01   0.00
   3   6     0.00   0.00   0.00     0.00   0.00   0.00     0.00   0.00   0.00
   4   8     0.00   0.00   0.00     0.00   0.00   0.00     0.00   0.00   0.00
   5   8     0.00  -0.01   0.00     0.00   0.00   0.00     0.00   0.00   0.00
   6   6    -0.01   0.03  -0.03     0.00   0.00   0.00     0.00   0.00   0.00
   7   6    -0.02  -0.01   0.04     0.00   0.00   0.00     0.00   0.00   0.00
   8   6     0.00   0.00   0.00    -0.01  -0.03   0.00    -0.04   0.00  -0.01
   9   6     0.00   0.00   0.00     0.00   0.00   0.00     0.03   0.00   0.01
  10   6     0.00   0.00   0.00    -0.01   0.00   0.00    -0.02  -0.01   0.01
  11   6     0.00   0.00   0.00     0.00   0.00   0.00    -0.02   0.01  -0.02
  12   6     0.00   0.00   0.00     0.00   0.00   0.00     0.02   0.00   0.01
  13   6     0.00   0.00   0.00    -0.01   0.00   0.00    -0.03  -0.02   0.01
  14   1     0.00   0.00   0.00     0.04   0.00   0.00     0.04   0.06  -0.01
  15   6     0.00   0.00   0.00    -0.01  -0.02   0.03    -0.03   0.01   0.00
  16   6     0.00   0.00   0.00     0.00   0.00   0.00    -0.01   0.01  -0.02
  17   1     0.00   0.00   0.00    -0.04  -0.04   0.00     0.03   0.01   0.00
  18   1     0.25  -0.10   0.47    -0.02   0.01  -0.04    -0.02   0.01  -0.01
  19   1    -0.19  -0.48   0.18     0.01   0.04  -0.01     0.01   0.01  -0.01
  20   1     0.12   0.06  -0.25    -0.01   0.00   0.02    -0.01  -0.01   0.00
  21   1    -0.13   0.03  -0.37     0.00   0.00   0.00     0.01   0.00   0.01
  22   1     0.20   0.31  -0.16     0.00   0.00   0.00    -0.01  -0.01   0.01
  23   6     0.00   0.00   0.00     0.00  -0.03  -0.02    -0.03   0.01  -0.01
  24   1     0.01   0.00   0.00     0.02   0.01  -0.01     0.10   0.04  -0.02
  25   1     0.00   0.00   0.00     0.01   0.00   0.00     0.09  -0.01   0.04
  26   1     0.00   0.00   0.00     0.01   0.01  -0.01     0.03   0.01  -0.01
  27   1     0.01   0.00   0.00     0.02   0.01  -0.01     0.10   0.04  -0.02
  28   1    -0.01   0.02   0.01    -0.13   0.46   0.01     0.05  -0.13  -0.31
  29   1    -0.02   0.00   0.00    -0.18  -0.18   0.16     0.44  -0.18   0.13
  30   1     0.01   0.00  -0.01     0.36   0.24   0.07     0.02   0.15   0.33
  31   1    -0.01   0.03   0.02    -0.08   0.39  -0.20    -0.05   0.00   0.32
  32   1     0.04  -0.04   0.00    -0.11  -0.25  -0.12     0.42  -0.19   0.09
  33   1     0.04   0.02  -0.04     0.37   0.21  -0.06     0.12   0.01  -0.32
  34   1     0.00   0.00   0.00     0.01   0.00   0.00     0.08  -0.01   0.04
                    73                     74                     75
                     A                      A                      A
 Frequencies --  1528.9746              1531.2647              1615.8786
 Red. masses --     1.8511                 1.1197                 5.1080
 Frc consts  --     2.5497                 1.5469                 7.8581
 IR Inten    --    10.4487                 5.9266                 1.3757
 Atom AN      X      Y      Z        X      Y      Z        X      Y      Z
   1   6    -0.03   0.00  -0.01     0.01   0.00   0.00     0.03   0.02   0.01
   2   6    -0.01  -0.01   0.00     0.00   0.00   0.00    -0.05  -0.05   0.00
   3   6     0.00   0.01   0.00    -0.01   0.01   0.00     0.00   0.00   0.00
   4   8     0.00   0.00   0.00     0.00   0.00   0.00     0.00   0.00   0.00
   5   8     0.00  -0.01   0.00     0.01  -0.01   0.01     0.00   0.00   0.00
   6   6     0.00  -0.01   0.01     0.00  -0.02   0.02     0.00   0.00   0.00
   7   6     0.00  -0.02   0.02     0.01  -0.05   0.05     0.00   0.00   0.00
   8   6     0.02   0.01   0.00     0.00   0.00   0.00     0.02   0.01   0.00
   9   6     0.12   0.01   0.02    -0.03   0.00  -0.01     0.00   0.15  -0.20
  10   6    -0.07  -0.05   0.06     0.02   0.01  -0.01    -0.11  -0.11   0.12
  11   6    -0.08   0.04  -0.08     0.02  -0.01   0.02    -0.05   0.12  -0.17
  12   6     0.08   0.01   0.01    -0.02   0.00   0.00    -0.02  -0.22   0.30
  13   6    -0.09  -0.06   0.06     0.02   0.01  -0.01     0.07   0.13  -0.16
  14   1    -0.05  -0.04   0.00     0.01   0.01   0.00    -0.04  -0.03   0.00
  15   6     0.01   0.00   0.00     0.00   0.00   0.00     0.00   0.00   0.00
  16   6    -0.06   0.04  -0.07     0.01  -0.01   0.02     0.10  -0.09   0.15
  17   1     0.01   0.00  -0.01     0.01   0.01   0.00     0.09   0.06   0.04
  18   1    -0.06   0.02  -0.12    -0.16   0.06  -0.32     0.00   0.00   0.00
  19   1     0.05   0.12  -0.05     0.14   0.31  -0.12     0.00   0.00   0.00
  20   1    -0.03  -0.01   0.07    -0.08  -0.04   0.17     0.00   0.00   0.00
  21   1    -0.10   0.04  -0.17    -0.30   0.12  -0.48     0.00   0.00   0.00
  22   1     0.07   0.19  -0.06     0.17   0.52  -0.16     0.00  -0.01   0.00
  23   6     0.01   0.00   0.00     0.00   0.00   0.00     0.00   0.00   0.00
  24   1     0.38   0.14  -0.08    -0.09  -0.03   0.02     0.31   0.07   0.00
  25   1     0.35  -0.06   0.18    -0.08   0.01  -0.04     0.23   0.06  -0.02
  26   1     0.10   0.01   0.01    -0.02   0.00   0.00     0.03   0.32  -0.44
  27   1     0.36   0.13  -0.08    -0.08  -0.03   0.02    -0.22   0.02  -0.08
  28   1    -0.01   0.01   0.13     0.01  -0.02  -0.03     0.00  -0.01   0.01
  29   1    -0.16   0.09  -0.07     0.04  -0.01   0.01     0.00   0.00   0.00
  30   1    -0.04  -0.08  -0.14     0.00   0.01   0.03    -0.01   0.00   0.00
  31   1     0.03  -0.03  -0.11     0.00  -0.01   0.03     0.01  -0.02  -0.01
  32   1    -0.15   0.09  -0.02     0.04  -0.01   0.01    -0.01   0.00   0.00
  33   1    -0.07  -0.02   0.13     0.00   0.00  -0.03    -0.02  -0.01   0.00
  34   1     0.34  -0.04   0.17    -0.07   0.01  -0.04    -0.31  -0.01  -0.10
                    76                     77                     78
                     A                      A                      A
 Frequencies --  1642.6523              1685.2167              1765.6432
 Red. masses --     5.3464                 7.4570                12.2722
 Frc consts  --     8.4997                12.4774                22.5412
 IR Inten    --     6.1434                 4.2136               242.7115
 Atom AN      X      Y      Z        X      Y      Z        X      Y      Z
   1   6    -0.04  -0.02   0.00     0.24   0.44  -0.06     0.03   0.15  -0.05
   2   6     0.01   0.02   0.00    -0.30  -0.44   0.03    -0.05  -0.08   0.00
   3   6     0.00   0.00   0.02     0.00   0.02  -0.09    -0.08  -0.47   0.63
   4   8     0.00   0.01  -0.01     0.00  -0.05   0.08     0.07   0.28  -0.42
   5   8     0.00   0.00   0.00     0.00   0.00   0.00     0.01   0.02  -0.04
   6   6     0.00   0.00   0.00     0.00   0.00   0.00    -0.01   0.01  -0.01
   7   6     0.00   0.00   0.00     0.00   0.01   0.00     0.02  -0.03   0.01
   8   6     0.00   0.00   0.00     0.08   0.07   0.01     0.01   0.01   0.00
   9   6     0.19   0.03   0.02    -0.04  -0.06   0.05    -0.03  -0.03   0.02
  10   6    -0.29  -0.07   0.02    -0.03   0.01  -0.02     0.00   0.00   0.00
  11   6     0.27  -0.01   0.09     0.05  -0.01   0.03     0.00   0.00   0.00
  12   6    -0.14  -0.02  -0.01    -0.01   0.02  -0.03     0.00   0.00   0.00
  13   6     0.28   0.07  -0.03     0.01  -0.01   0.02    -0.01   0.00   0.00
  14   1     0.01   0.01   0.00    -0.25  -0.16  -0.03    -0.01   0.00   0.03
  15   6     0.00   0.00   0.00     0.01   0.01   0.01     0.00   0.00   0.00
  16   6    -0.27   0.01  -0.10    -0.03   0.02  -0.03     0.02   0.01   0.00
  17   1    -0.02  -0.01  -0.01     0.51   0.15   0.08     0.02   0.00   0.07
  18   1     0.00   0.00   0.00     0.00   0.00   0.01     0.02  -0.01  -0.03
  19   1     0.00   0.00   0.00    -0.01   0.00   0.00     0.03   0.00  -0.02
  20   1     0.00   0.00   0.00     0.00   0.00  -0.01    -0.04   0.00   0.05
  21   1     0.00   0.00   0.00     0.03  -0.01   0.00    -0.13   0.06   0.03
  22   1     0.00   0.00   0.00     0.02  -0.05  -0.01    -0.07   0.10   0.07
  23   6     0.00   0.00   0.00     0.01   0.01  -0.01     0.00   0.00   0.00
  24   1     0.33   0.20  -0.18    -0.01   0.02  -0.03     0.09   0.02  -0.05
  25   1    -0.25   0.12  -0.23    -0.06   0.01  -0.04     0.01   0.00   0.00
  26   1    -0.16  -0.01  -0.03    -0.02  -0.03   0.02     0.01   0.01  -0.01
  27   1    -0.28  -0.17   0.16     0.02  -0.01   0.02     0.02   0.01  -0.01
  28   1     0.00   0.00  -0.01     0.01  -0.03   0.07     0.00   0.00   0.01
  29   1     0.00   0.00   0.00    -0.03   0.00   0.00     0.00   0.01  -0.01
  30   1     0.00   0.00   0.00    -0.04  -0.02   0.00     0.00   0.00  -0.01
  31   1     0.00   0.01   0.00     0.03  -0.05  -0.04     0.01  -0.01  -0.01
  32   1     0.00   0.00   0.00    -0.03   0.00  -0.01     0.00  -0.01   0.00
  33   1     0.00   0.00   0.00    -0.04  -0.02  -0.01     0.00   0.00  -0.02
  34   1     0.26  -0.11   0.25     0.04  -0.02  -0.02    -0.02   0.01  -0.03
                    79                     80                     81
                     A                      A                      A
 Frequencies --  3020.2368              3024.6879              3041.0619
 Red. masses --     1.0361                 1.0367                 1.0358
 Frc consts  --     5.5685                 5.5881                 5.6440
 IR Inten    --    25.0092                48.4664                20.0630
 Atom AN      X      Y      Z        X      Y      Z        X      Y      Z
   1   6     0.00   0.00   0.00     0.00   0.00   0.00     0.00   0.00   0.00
   2   6     0.00   0.00   0.00     0.00   0.00   0.00     0.00   0.00   0.00
   3   6     0.00   0.00   0.00     0.00   0.00   0.00     0.00   0.00   0.00
   4   8     0.00   0.00   0.00     0.00   0.00   0.00     0.00   0.00   0.00
   5   8     0.00   0.00   0.00     0.00   0.00   0.00     0.00   0.00   0.00
   6   6     0.00   0.00   0.00     0.00   0.00   0.00     0.03  -0.01  -0.04
   7   6     0.00   0.00   0.00     0.00   0.00   0.00     0.00   0.00   0.00
   8   6     0.00   0.00   0.00     0.00   0.00   0.00     0.00   0.00   0.00
   9   6     0.00   0.00   0.00     0.00   0.00   0.00     0.00   0.00   0.00
  10   6     0.00   0.00   0.00     0.00   0.00   0.00     0.00   0.00   0.00
  11   6     0.00   0.00   0.00     0.00   0.00   0.00     0.00   0.00   0.00
  12   6     0.00   0.00   0.00     0.00   0.00   0.00     0.00   0.00   0.00
  13   6     0.00   0.00   0.00     0.00   0.00   0.00     0.00   0.00   0.00
  14   1     0.00  -0.01   0.00    -0.03   0.04  -0.01     0.00   0.00   0.00
  15   6     0.00   0.03   0.02     0.00   0.03   0.02     0.00   0.00   0.00
  16   6     0.00   0.00   0.00     0.00   0.00   0.00     0.00   0.00   0.00
  17   1     0.00   0.00   0.00    -0.01   0.02   0.00     0.00   0.00   0.00
  18   1     0.00   0.00   0.00     0.00   0.00   0.00    -0.33  -0.45   0.06
  19   1     0.00   0.00   0.00     0.00   0.00   0.00     0.28   0.08   0.46
  20   1     0.00   0.00   0.00     0.00   0.00   0.00    -0.35   0.50  -0.11
  21   1     0.00   0.00   0.00     0.00   0.00   0.00    -0.01  -0.01   0.00
  22   1     0.00   0.00   0.00     0.00   0.00   0.00     0.01   0.00   0.02
  23   6    -0.01  -0.02   0.03     0.01   0.02  -0.02     0.00   0.00   0.00
  24   1     0.00   0.00   0.00     0.00   0.00   0.00     0.00   0.00   0.00
  25   1     0.00   0.00   0.00     0.00   0.00   0.00     0.00   0.00   0.00
  26   1     0.00   0.00   0.00     0.00   0.00   0.00     0.00   0.00   0.00
  27   1     0.00   0.00   0.00     0.00   0.00   0.00     0.00   0.00   0.00
  28   1     0.44   0.11   0.06    -0.36  -0.09  -0.04     0.00   0.00   0.00
  29   1    -0.02  -0.24  -0.24     0.02   0.20   0.20     0.00   0.00   0.00
  30   1    -0.27   0.42  -0.15     0.22  -0.35   0.13     0.00   0.00   0.00
  31   1    -0.36  -0.09  -0.04    -0.42  -0.10  -0.04     0.00   0.00   0.00
  32   1     0.10   0.11  -0.26     0.12   0.14  -0.31     0.00   0.00   0.00
  33   1     0.22  -0.35   0.10     0.27  -0.43   0.11     0.00   0.00   0.00
  34   1     0.00   0.00   0.00     0.00   0.00   0.00     0.00   0.00   0.00
                    82                     83                     84
                     A                      A                      A
 Frequencies --  3057.7926              3060.5585              3077.7428
 Red. masses --     1.0858                 1.0595                 1.1019
 Frc consts  --     5.9813                 5.8474                 6.1496
 IR Inten    --     2.7139                15.9502                 1.2446
 Atom AN      X      Y      Z        X      Y      Z        X      Y      Z
   1   6     0.00   0.00   0.00     0.00   0.00   0.00     0.00   0.00   0.00
   2   6     0.00   0.01   0.00     0.00   0.00   0.00     0.00   0.00   0.00
   3   6     0.00   0.00   0.00     0.00   0.00   0.00     0.00   0.00   0.00
   4   8     0.00   0.00   0.00     0.00   0.00   0.00     0.00   0.00   0.00
   5   8     0.00   0.00   0.00     0.00   0.00   0.00     0.00   0.00   0.00
   6   6     0.00   0.00   0.00     0.01  -0.01   0.01     0.00   0.00   0.00
   7   6     0.00   0.00   0.01     0.00   0.03  -0.06     0.00   0.00   0.00
   8   6     0.04  -0.06   0.02     0.00  -0.01   0.00     0.00   0.00   0.00
   9   6     0.00   0.00   0.00     0.00   0.00   0.00     0.00   0.00   0.00
  10   6     0.00   0.00   0.00     0.00   0.00   0.00     0.00   0.00   0.00
  11   6     0.00   0.00   0.00     0.00   0.00   0.00     0.00   0.00   0.00
  12   6     0.00   0.00   0.00     0.00   0.00   0.00     0.00   0.00   0.00
  13   6     0.00   0.00   0.00     0.00   0.00   0.00     0.00   0.00   0.00
  14   1    -0.45   0.70  -0.21    -0.05   0.07  -0.02     0.02  -0.04   0.01
  15   6    -0.02   0.02  -0.02     0.00   0.00   0.00     0.05  -0.02   0.02
  16   6     0.00   0.00   0.00     0.00   0.00   0.00     0.00   0.00   0.00
  17   1     0.06  -0.07   0.02     0.01  -0.01   0.00     0.00   0.00   0.00
  18   1     0.00   0.00   0.00     0.04   0.05   0.00     0.00   0.00   0.00
  19   1     0.01   0.00   0.01    -0.05  -0.02  -0.08     0.00   0.00   0.00
  20   1     0.01  -0.01   0.00    -0.05   0.08  -0.02     0.00   0.00   0.00
  21   1     0.04   0.05  -0.01    -0.38  -0.48   0.06     0.00   0.00   0.00
  22   1    -0.04  -0.02  -0.07     0.38   0.13   0.65     0.00   0.00   0.00
  23   6    -0.03   0.02   0.00     0.00   0.00   0.00    -0.06   0.03  -0.01
  24   1     0.00   0.00   0.00     0.00   0.00   0.00     0.00   0.00   0.00
  25   1     0.00   0.00   0.00     0.00   0.00   0.00     0.00   0.00   0.00
  26   1     0.00   0.00   0.00     0.00   0.00   0.00     0.00   0.00   0.00
  27   1     0.00   0.00   0.00     0.00   0.00   0.00     0.00   0.00   0.00
  28   1     0.22   0.07   0.03     0.03   0.01   0.00     0.51   0.15   0.06
  29   1    -0.02  -0.08  -0.09     0.00  -0.01  -0.01    -0.02  -0.04  -0.05
  30   1     0.11  -0.19   0.07     0.01  -0.02   0.01     0.26  -0.42   0.15
  31   1     0.20   0.05   0.02     0.02   0.01   0.00    -0.44  -0.12  -0.04
  32   1    -0.06  -0.05   0.12    -0.01  -0.01   0.01     0.05   0.03  -0.09
  33   1     0.12  -0.19   0.05     0.01  -0.02   0.00    -0.23   0.38  -0.10
  34   1     0.00   0.00   0.00     0.00   0.00   0.00     0.00   0.00   0.00
                    85                     86                     87
                     A                      A                      A
 Frequencies --  3089.3049              3094.5511              3096.8948
 Red. masses --     1.0986                 1.1065                 1.1018
 Frc consts  --     6.1773                 6.2428                 6.2260
 IR Inten    --    76.9503                 0.4788                25.2490
 Atom AN      X      Y      Z        X      Y      Z        X      Y      Z
   1   6     0.00   0.00   0.00     0.00   0.00   0.00     0.00   0.00   0.00
   2   6    -0.01   0.01   0.00     0.00   0.00   0.00     0.00   0.00   0.00
   3   6     0.00   0.00   0.00     0.00   0.00   0.00     0.00   0.00   0.00
   4   8     0.00   0.00   0.00     0.00   0.00   0.00     0.00   0.00   0.00
   5   8     0.00   0.00   0.00     0.00   0.00   0.00     0.00   0.00   0.00
   6   6     0.00   0.00   0.00     0.03   0.04   0.02     0.00   0.00   0.00
   7   6     0.00   0.00   0.00    -0.05  -0.05  -0.03     0.00   0.00   0.00
   8   6     0.02  -0.03   0.01     0.00   0.00   0.00     0.00  -0.01   0.00
   9   6     0.00   0.00   0.00     0.00   0.00   0.00     0.00   0.00   0.00
  10   6     0.00   0.00   0.00     0.00   0.00   0.00     0.00   0.00   0.00
  11   6     0.00   0.00   0.00     0.00   0.00   0.00     0.00   0.00   0.00
  12   6     0.00   0.00   0.00     0.00   0.00   0.00     0.00   0.00   0.00
  13   6     0.00   0.00   0.00     0.00   0.00   0.00     0.00   0.00   0.00
  14   1    -0.23   0.35  -0.11    -0.01   0.01   0.00    -0.05   0.08  -0.02
  15   6     0.06  -0.02   0.01     0.00   0.00   0.00    -0.04  -0.05   0.06
  16   6     0.00   0.00   0.00     0.00   0.00   0.00     0.00   0.00   0.00
  17   1     0.09  -0.12   0.03     0.00   0.00   0.00     0.03  -0.04   0.01
  18   1     0.01   0.01   0.00    -0.28  -0.38   0.05     0.00   0.00   0.00
  19   1     0.00   0.00   0.01    -0.19  -0.05  -0.32     0.00   0.00   0.01
  20   1     0.00   0.00   0.00     0.07  -0.07   0.02     0.00  -0.01   0.00
  21   1     0.00   0.00   0.00     0.37   0.48  -0.08    -0.01  -0.01   0.00
  22   1     0.00   0.00   0.00     0.23   0.08   0.43     0.00   0.00  -0.01
  23   6     0.05  -0.01   0.02     0.00   0.00   0.00     0.01   0.02   0.01
  24   1     0.00   0.00   0.00     0.00   0.00   0.00     0.00   0.00   0.00
  25   1     0.00   0.00   0.00     0.00   0.00   0.00     0.00   0.00   0.00
  26   1     0.00   0.00   0.00     0.00   0.00   0.00     0.00   0.00   0.00
  27   1     0.00   0.00   0.00     0.00   0.00   0.00     0.00   0.00   0.00
  28   1    -0.42  -0.12  -0.04    -0.01   0.00   0.00    -0.11  -0.03  -0.01
  29   1     0.00  -0.04  -0.04     0.00  -0.01  -0.01    -0.01  -0.17  -0.17
  30   1    -0.17   0.29  -0.10     0.00   0.00   0.00     0.02  -0.03   0.01
  31   1    -0.50  -0.14  -0.06     0.00   0.00   0.00     0.36   0.08   0.05
  32   1     0.00  -0.01   0.02     0.00   0.00  -0.01     0.28   0.30  -0.73
  33   1    -0.22   0.37  -0.09     0.00   0.00   0.00    -0.14   0.21  -0.04
  34   1     0.00   0.00   0.00     0.00   0.00   0.00     0.00   0.00   0.00
                    88                     89                     90
                     A                      A                      A
 Frequencies --  3100.7583              3105.8011              3117.4569
 Red. masses --     1.1010                 1.1004                 1.0874
 Frc consts  --     6.2371                 6.2540                 6.2263
 IR Inten    --    34.9134                30.5336                28.7331
 Atom AN      X      Y      Z        X      Y      Z        X      Y      Z
   1   6     0.00   0.00   0.00     0.00   0.00   0.00     0.00   0.00   0.00
   2   6    -0.01   0.01   0.00     0.00   0.00   0.00     0.05  -0.07   0.02
   3   6     0.00   0.00   0.00     0.00   0.00   0.00     0.00   0.00   0.00
   4   8     0.00   0.00   0.00     0.00   0.00   0.00     0.00   0.00   0.00
   5   8     0.00   0.00   0.00     0.00   0.00   0.00     0.00   0.00   0.00
   6   6     0.00   0.00   0.00     0.04  -0.07   0.05     0.00   0.00   0.00
   7   6     0.00   0.00   0.00    -0.01  -0.01   0.01     0.00   0.00   0.00
   8   6     0.01  -0.01   0.00     0.00   0.00   0.00     0.01  -0.01   0.00
   9   6     0.00   0.00   0.00     0.00   0.00   0.00     0.00   0.00   0.00
  10   6     0.00   0.00   0.00     0.00   0.00   0.00     0.00   0.00   0.00
  11   6     0.00   0.00   0.00     0.00   0.00   0.00     0.00   0.00   0.00
  12   6     0.00   0.00   0.00     0.00   0.00   0.00     0.00   0.00   0.00
  13   6     0.00   0.00   0.00     0.00   0.00   0.00     0.00   0.00   0.00
  14   1    -0.08   0.12  -0.04     0.00  -0.01   0.00    -0.09   0.14  -0.04
  15   6    -0.01  -0.01   0.02     0.00   0.00   0.00     0.00  -0.01   0.00
  16   6     0.00   0.00   0.00     0.00   0.00   0.00     0.00   0.00   0.00
  17   1     0.07  -0.09   0.02    -0.01   0.01   0.00    -0.59   0.75  -0.19
  18   1     0.01   0.01   0.00     0.25   0.31  -0.04     0.01   0.02   0.00
  19   1    -0.01   0.00  -0.02    -0.23  -0.08  -0.39     0.02   0.00   0.03
  20   1    -0.02   0.03  -0.01    -0.44   0.61  -0.12     0.00  -0.01   0.00
  21   1     0.01   0.01   0.00     0.11   0.14  -0.02     0.01   0.01   0.00
  22   1     0.00   0.00   0.01    -0.03  -0.01  -0.05     0.01   0.00   0.02
  23   6    -0.02  -0.07  -0.05     0.00   0.00   0.00     0.00  -0.01   0.00
  24   1     0.00   0.00   0.00     0.00   0.00   0.00     0.00   0.00   0.00
  25   1     0.00   0.00   0.00     0.00   0.00   0.00     0.00   0.00   0.00
  26   1     0.00   0.00   0.00     0.00   0.00   0.00     0.00   0.00   0.00
  27   1     0.00   0.00   0.00     0.00   0.00   0.00     0.00   0.00  -0.01
  28   1     0.31   0.07   0.03    -0.01   0.00   0.00    -0.01   0.00   0.00
  29   1     0.05   0.58   0.61     0.00  -0.03  -0.03     0.00   0.04   0.04
  30   1    -0.15   0.22  -0.09     0.01  -0.01   0.00    -0.04   0.07  -0.03
  31   1     0.07   0.01   0.01     0.00   0.00   0.00    -0.02  -0.01   0.00
  32   1     0.07   0.08  -0.19     0.00   0.00   0.00     0.01   0.01  -0.04
  33   1    -0.05   0.08  -0.02     0.00   0.00   0.00    -0.04   0.07  -0.01
  34   1     0.00   0.00   0.00     0.00   0.00   0.00    -0.02  -0.03   0.03
                    91                     92                     93
                     A                      A                      A
 Frequencies --  3120.8292              3158.2317              3167.5631
 Red. masses --     1.1062                 1.0855                 1.0887
 Frc consts  --     6.3476                 6.3791                 6.4361
 IR Inten    --    43.3230                 0.6618                10.8142
 Atom AN      X      Y      Z        X      Y      Z        X      Y      Z
   1   6     0.00   0.00   0.00     0.00   0.00   0.00     0.00   0.00   0.00
   2   6     0.00   0.00   0.00     0.00   0.00   0.00     0.00   0.00   0.00
   3   6     0.00   0.00   0.00     0.00   0.00   0.00     0.00   0.00   0.00
   4   8     0.00   0.00   0.00     0.00   0.00   0.00     0.00   0.00   0.00
   5   8     0.00   0.00   0.00     0.00   0.00   0.00     0.00   0.00   0.00
   6   6    -0.05  -0.04  -0.04     0.00   0.00   0.00     0.00   0.00   0.00
   7   6    -0.04  -0.04  -0.02     0.00   0.00   0.00     0.00   0.00   0.00
   8   6     0.00   0.00   0.00     0.00   0.00   0.00     0.00   0.00   0.00
   9   6     0.00   0.00   0.00     0.00   0.00   0.00     0.00   0.00   0.00
  10   6     0.00   0.00   0.00     0.00   0.00   0.00     0.00   0.00  -0.01
  11   6     0.00   0.00   0.00     0.02   0.02  -0.02    -0.03  -0.03   0.04
  12   6     0.00   0.00   0.00    -0.05  -0.01  -0.01     0.02   0.00   0.00
  13   6     0.00   0.00   0.00     0.02  -0.02   0.04     0.02  -0.02   0.03
  14   1     0.01  -0.01   0.00     0.00   0.00   0.00     0.00   0.00   0.00
  15   6     0.00   0.00   0.00     0.00   0.00   0.00     0.00   0.00   0.00
  16   6     0.00   0.00   0.00     0.01   0.01  -0.02     0.02   0.02  -0.02
  17   1     0.03  -0.03   0.01     0.01  -0.01   0.00     0.02  -0.02   0.00
  18   1     0.32   0.43  -0.07     0.00   0.00   0.00     0.00   0.00   0.00
  19   1     0.29   0.08   0.49     0.00   0.00   0.00     0.00   0.00   0.00
  20   1     0.00  -0.02   0.00     0.00   0.00   0.00     0.00   0.00   0.00
  21   1     0.28   0.35  -0.06     0.00   0.00   0.00     0.00   0.00   0.00
  22   1     0.18   0.06   0.34     0.00   0.00   0.00     0.00   0.00   0.00
  23   6     0.00   0.00   0.00     0.00   0.00   0.00     0.00   0.00   0.00
  24   1     0.00   0.00   0.00    -0.03   0.03  -0.05     0.05  -0.06   0.10
  25   1     0.00   0.00   0.00    -0.22  -0.24   0.26     0.36   0.39  -0.43
  26   1     0.00   0.00   0.00     0.57   0.06   0.08    -0.26  -0.03  -0.03
  27   1     0.00   0.00   0.00    -0.28   0.28  -0.48    -0.22   0.23  -0.39
  28   1     0.00   0.00   0.00     0.00   0.00   0.00     0.00   0.00   0.00
  29   1     0.00   0.00   0.00     0.00   0.00   0.00     0.00   0.00   0.00
  30   1     0.00  -0.01   0.00     0.00   0.00   0.00     0.00   0.00   0.00
  31   1     0.00   0.00   0.00     0.00   0.00   0.00     0.00   0.00   0.00
  32   1     0.00   0.00   0.00     0.00   0.00   0.00     0.00   0.00   0.00
  33   1     0.00  -0.01   0.00     0.00   0.00   0.00     0.00   0.00   0.00
  34   1     0.00   0.00   0.00    -0.16  -0.16   0.20    -0.23  -0.24   0.28
                    94                     95                     96
                     A                      A                      A
 Frequencies --  3178.5263              3187.2383              3209.9122
 Red. masses --     1.0924                 1.0966                 1.0926
 Frc consts  --     6.5025                 6.5631                 6.6327
 IR Inten    --    31.8267                22.9062                 3.1539
 Atom AN      X      Y      Z        X      Y      Z        X      Y      Z
   1   6     0.00   0.00   0.00     0.00   0.00   0.00     0.00   0.00   0.00
   2   6     0.00   0.00   0.00     0.00   0.00   0.00     0.00   0.00   0.00
   3   6     0.00   0.00   0.00     0.00   0.00   0.00     0.00   0.00   0.00
   4   8     0.00   0.00   0.00     0.00   0.00   0.00     0.00   0.00   0.00
   5   8     0.00   0.00   0.00     0.00   0.00   0.00     0.00   0.00   0.00
   6   6     0.00   0.00   0.00     0.00   0.00   0.00     0.00   0.00   0.00
   7   6     0.00   0.00   0.00     0.00   0.00   0.00     0.00   0.00   0.00
   8   6     0.00   0.00   0.00     0.00   0.00   0.00     0.00   0.00   0.00
   9   6     0.00   0.00   0.00     0.00   0.00   0.00     0.00   0.00   0.00
  10   6     0.00   0.00  -0.01     0.00   0.01  -0.01    -0.04   0.04  -0.07
  11   6    -0.02  -0.02   0.03    -0.01  -0.02   0.02     0.01   0.01  -0.01
  12   6    -0.04   0.00  -0.01    -0.05  -0.01  -0.01     0.01   0.00   0.00
  13   6     0.01  -0.01   0.01    -0.02   0.02  -0.04     0.00   0.00   0.00
  14   1     0.00   0.00   0.00     0.00   0.00   0.00     0.00   0.00   0.00
  15   6     0.00   0.00   0.00     0.00   0.00   0.00     0.00   0.00   0.00
  16   6    -0.03  -0.03   0.04     0.02   0.02  -0.03     0.00   0.00   0.00
  17   1    -0.02   0.02  -0.01     0.01  -0.01   0.00     0.00   0.00   0.00
  18   1     0.00   0.00   0.00     0.00   0.00   0.00     0.00   0.00   0.00
  19   1     0.00   0.00   0.00     0.00   0.00   0.00     0.00   0.00   0.00
  20   1     0.00   0.00   0.00     0.00   0.00   0.00     0.00   0.00   0.00
  21   1     0.00   0.00   0.00     0.00   0.00   0.00     0.00   0.00   0.00
  22   1     0.00   0.00   0.00     0.00   0.00   0.00     0.00   0.00   0.00
  23   6     0.00   0.00   0.00     0.00   0.00   0.00     0.00   0.00   0.00
  24   1     0.05  -0.05   0.08     0.06  -0.06   0.10     0.43  -0.45   0.75
  25   1     0.24   0.27  -0.30     0.15   0.17  -0.19    -0.11  -0.12   0.13
  26   1     0.50   0.05   0.07     0.57   0.06   0.08    -0.05  -0.01  -0.01
  27   1    -0.09   0.09  -0.15     0.25  -0.25   0.43    -0.01   0.01  -0.03
  28   1     0.00   0.00   0.00     0.00   0.00   0.00     0.00   0.00   0.00
  29   1     0.00   0.00   0.00     0.00   0.00   0.00     0.00   0.00   0.00
  30   1     0.00   0.00   0.00     0.00   0.00   0.00     0.00   0.00   0.00
  31   1     0.00   0.00   0.00     0.00   0.00   0.00     0.00   0.00   0.00
  32   1     0.00   0.00   0.00     0.00   0.00   0.00     0.00   0.00   0.00
  33   1     0.00   0.00   0.00     0.00   0.00   0.00     0.00   0.00   0.00
  34   1     0.37   0.37  -0.45    -0.26  -0.26   0.32     0.01   0.01  -0.01

 -------------------
 - Thermochemistry -
 -------------------
 Temperature   298.150 Kelvin.  Pressure   1.00000 Atm.
 Atom  1 has atomic number  6 and mass  12.00000
 Atom  2 has atomic number  6 and mass  12.00000
 Atom  3 has atomic number  6 and mass  12.00000
 Atom  4 has atomic number  8 and mass  15.99491
 Atom  5 has atomic number  8 and mass  15.99491
 Atom  6 has atomic number  6 and mass  12.00000
 Atom  7 has atomic number  6 and mass  12.00000
 Atom  8 has atomic number  6 and mass  12.00000
 Atom  9 has atomic number  6 and mass  12.00000
 Atom 10 has atomic number  6 and mass  12.00000
 Atom 11 has atomic number  6 and mass  12.00000
 Atom 12 has atomic number  6 and mass  12.00000
 Atom 13 has atomic number  6 and mass  12.00000
 Atom 14 has atomic number  1 and mass   1.00783
 Atom 15 has atomic number  6 and mass  12.00000
 Atom 16 has atomic number  6 and mass  12.00000
 Atom 17 has atomic number  1 and mass   1.00783
 Atom 18 has atomic number  1 and mass   1.00783
 Atom 19 has atomic number  1 and mass   1.00783
 Atom 20 has atomic number  1 and mass   1.00783
 Atom 21 has atomic number  1 and mass   1.00783
 Atom 22 has atomic number  1 and mass   1.00783
 Atom 23 has atomic number  6 and mass  12.00000
 Atom 24 has atomic number  1 and mass   1.00783
 Atom 25 has atomic number  1 and mass   1.00783
 Atom 26 has atomic number  1 and mass   1.00783
 Atom 27 has atomic number  1 and mass   1.00783
 Atom 28 has atomic number  1 and mass   1.00783
 Atom 29 has atomic number  1 and mass   1.00783
 Atom 30 has atomic number  1 and mass   1.00783
 Atom 31 has atomic number  1 and mass   1.00783
 Atom 32 has atomic number  1 and mass   1.00783
 Atom 33 has atomic number  1 and mass   1.00783
 Atom 34 has atomic number  1 and mass   1.00783
 Molecular mass:   218.13068 amu.
 Principal axes and moments of inertia in atomic units:
                           1         2         3
     EIGENVALUES --  2788.947235321.290806770.98636
           X            0.99996   0.00673  -0.00596
           Y           -0.00666   0.99990   0.01280
           Z            0.00605  -0.01276   0.99990
 This molecule is an asymmetric top.
 Rotational symmetry number  1.
 Warning -- assumption of classical behavior for rotation
           may cause significant error
 Rotational temperatures (Kelvin)      0.03106     0.01628     0.01279
 Rotational constants (GHZ):           0.64710     0.33915     0.26654
 Zero-point vibrational energy     758036.8 (Joules/Mol)
                                  181.17515 (Kcal/Mol)
 Warning -- explicit consideration of  23 degrees of freedom as
           vibrations may cause significant error
 Vibrational temperatures:     23.27    55.33    65.49    94.02   105.20
          (Kelvin)            125.76   148.55   199.89   252.97   300.87
                              324.01   348.45   372.83   383.74   395.00
                              467.37   553.54   555.54   578.81   600.34
                              653.98   715.73   795.56   911.58   927.94
                             1007.64  1021.24  1082.55  1140.00  1173.33
                             1221.60  1231.39  1244.49  1267.14  1323.56
                             1345.60  1351.06  1372.51  1393.05  1407.45
                             1422.99  1438.59  1463.54  1501.22  1520.44
                             1591.36  1606.42  1639.28  1690.15  1702.62
                             1705.57  1717.22  1737.36  1746.90  1832.14
                             1882.59  1892.60  1933.85  1956.56  1962.63
                             2004.35  2026.34  2027.93  2058.70  2066.11
                             2128.66  2163.05  2164.21  2166.90  2174.90
                             2184.64  2196.35  2199.85  2203.15  2324.89
                             2363.41  2424.65  2540.36  4345.44  4351.85
                             4375.40  4399.48  4403.46  4428.18  4444.82
                             4452.36  4455.74  4461.29  4468.55  4485.32
                             4490.17  4543.99  4557.41  4573.18  4585.72
                             4618.34
 
 Zero-point correction=                           0.288721 (Hartree/Particle)
 Thermal correction to Energy=                    0.305530
 Thermal correction to Enthalpy=                  0.306475
 Thermal correction to Gibbs Free Energy=         0.242130
 Sum of electronic and zero-point Energies=           -694.660015
 Sum of electronic and thermal Energies=              -694.643205
 Sum of electronic and thermal Enthalpies=            -694.642261
 Sum of electronic and thermal Free Energies=         -694.706606
 
                     E (Thermal)             CV                S
                      KCal/Mol        Cal/Mol-Kelvin    Cal/Mol-Kelvin
 Total                  191.723             61.757            135.425
 Electronic               0.000              0.000              0.000
 Translational            0.889              2.981             42.043
 Rotational               0.889              2.981             32.974
 Vibrational            189.946             55.795             60.408
 Vibration  1             0.593              1.986              7.056
 Vibration  2             0.594              1.982              5.337
 Vibration  3             0.595              1.979              5.003
 Vibration  4             0.597              1.971              4.289
 Vibration  5             0.599              1.967              4.068
 Vibration  6             0.601              1.958              3.717
 Vibration  7             0.605              1.947              3.392
 Vibration  8             0.615              1.914              2.819
 Vibration  9             0.628              1.872              2.372
 Vibration 10             0.642              1.827              2.051
 Vibration 11             0.650              1.803              1.917
 Vibration 12             0.658              1.776              1.787
 Vibration 13             0.668              1.747              1.668
 Vibration 14             0.672              1.734              1.617
 Vibration 15             0.677              1.720              1.567
 Vibration 16             0.709              1.626              1.286
 Vibration 17             0.754              1.503              1.021
 Vibration 18             0.755              1.500              1.015
 Vibration 19             0.768              1.465              0.954
 Vibration 20             0.780              1.433              0.901
 Vibration 21             0.813              1.351              0.782
 Vibration 22             0.853              1.256              0.665
 Vibration 23             0.908              1.133              0.538
                       Q            Log10(Q)             Ln(Q)
 Total Bot       0.424946-111       -111.371666       -256.442739
 Total V=0       0.269457D+22         21.430489         49.345525
 Vib (Bot)       0.935195-126       -126.029098       -290.192722
 Vib (Bot)  1    0.128093D+02          1.107527          2.550175
 Vib (Bot)  2    0.538097D+01          0.730861          1.682869
 Vib (Bot)  3    0.454325D+01          0.657366          1.513642
 Vib (Bot)  4    0.315811D+01          0.499428          1.149975
 Vib (Bot)  5    0.281941D+01          0.450158          1.036527
 Vib (Bot)  6    0.235326D+01          0.371670          0.855802
 Vib (Bot)  7    0.198639D+01          0.298065          0.686320
 Vib (Bot)  8    0.146402D+01          0.165546          0.381185
 Vib (Bot)  9    0.114398D+01          0.058419          0.134516
 Vib (Bot) 10    0.950123D+00         -0.022220         -0.051163
 Vib (Bot) 11    0.876418D+00         -0.057289         -0.131912
 Vib (Bot) 12    0.808814D+00         -0.092151         -0.212186
 Vib (Bot) 13    0.749881D+00         -0.125008         -0.287841
 Vib (Bot) 14    0.725818D+00         -0.139172         -0.320456
 Vib (Bot) 15    0.702315D+00         -0.153468         -0.353374
 Vib (Bot) 16    0.577009D+00         -0.238817         -0.549897
 Vib (Bot) 17    0.468391D+00         -0.329391         -0.758452
 Vib (Bot) 18    0.466254D+00         -0.331377         -0.763024
 Vib (Bot) 19    0.442301D+00         -0.354282         -0.815765
 Vib (Bot) 20    0.421700D+00         -0.374997         -0.863462
 Vib (Bot) 21    0.375885D+00         -0.424945         -0.978471
 Vib (Bot) 22    0.331128D+00         -0.480005         -1.105252
 Vib (Bot) 23    0.283014D+00         -0.548192         -1.262260
 Vib (V=0)       0.593004D+07          6.773058         15.595542
 Vib (V=0)  1    0.133191D+02          1.124475          2.589199
 Vib (V=0)  2    0.590415D+01          0.771157          1.775656
 Vib (V=0)  3    0.507068D+01          0.705066          1.623475
 Vib (V=0)  4    0.369745D+01          0.567902          1.307643
 Vib (V=0)  5    0.336340D+01          0.526778          1.212952
 Vib (V=0)  6    0.290579D+01          0.463264          1.066706
 Vib (V=0)  7    0.254835D+01          0.406260          0.935448
 Vib (V=0)  8    0.204705D+01          0.311127          0.716397
 Vib (V=0)  9    0.174848D+01          0.242660          0.558745
 Vib (V=0) 10    0.157365D+01          0.196909          0.453401
 Vib (V=0) 11    0.150901D+01          0.178693          0.411456
 Vib (V=0) 12    0.145088D+01          0.161633          0.372173
 Vib (V=0) 13    0.140129D+01          0.146528          0.337392
 Vib (V=0) 14    0.138137D+01          0.140310          0.323075
 Vib (V=0) 15    0.136212D+01          0.134214          0.309040
 Vib (V=0) 16    0.126350D+01          0.101577          0.233889
 Vib (V=0) 17    0.118512D+01          0.073763          0.169845
 Vib (V=0) 18    0.118366D+01          0.073228          0.168613
 Vib (V=0) 19    0.116756D+01          0.067277          0.154912
 Vib (V=0) 20    0.115409D+01          0.062239          0.143310
 Vib (V=0) 21    0.112553D+01          0.051358          0.118255
 Vib (V=0) 22    0.109970D+01          0.041276          0.095042
 Vib (V=0) 23    0.107454D+01          0.031223          0.071893
 Electronic      0.100000D+01          0.000000          0.000000
 Translational   0.126628D+09          8.102530         18.656765
 Rotational      0.358840D+07          6.554901         15.093217
 ***** Axes restored to original set *****
 -------------------------------------------------------------------
 Center     Atomic                   Forces (Hartrees/Bohr)
 Number     Number              X              Y              Z
 -------------------------------------------------------------------
    1          6          -0.000001381    0.000001400    0.000003805
    2          6          -0.000000347   -0.000000745    0.000001040
    3          6          -0.000003981   -0.000004320   -0.000004808
    4          8           0.000002096    0.000001032    0.000001989
    5          8           0.000002686    0.000003246    0.000003005
    6          6          -0.000000855   -0.000000330   -0.000001248
    7          6          -0.000003432   -0.000002763   -0.000003403
    8          6          -0.000000271    0.000000452    0.000002699
    9          6           0.000000878    0.000000042   -0.000003821
   10          6           0.000000099   -0.000000647   -0.000002189
   11          6          -0.000000866   -0.000000225   -0.000001668
   12          6          -0.000000025    0.000000802   -0.000001260
   13          6           0.000000481    0.000001632   -0.000001522
   14          1          -0.000000421   -0.000001269    0.000000925
   15          6          -0.000000926   -0.000002346    0.000003597
   16          6          -0.000000082    0.000000915    0.000000681
   17          1           0.000001218   -0.000000526   -0.000003831
   18          1          -0.000000092   -0.000000069   -0.000000203
   19          1           0.000000042    0.000000816   -0.000001117
   20          1          -0.000000228   -0.000000006   -0.000001259
   21          1          -0.000000332    0.000000138    0.000000525
   22          1           0.000001099   -0.000000066   -0.000001810
   23          6           0.000002875    0.000001291    0.000002600
   24          1          -0.000000836   -0.000000647   -0.000001063
   25          1          -0.000000534   -0.000000173   -0.000002337
   26          1           0.000000141    0.000001211   -0.000002009
   27          1           0.000000751    0.000001790   -0.000000498
   28          1           0.000001122   -0.000002502    0.000001787
   29          1          -0.000001740    0.000001749    0.000001052
   30          1           0.000002236    0.000002442    0.000003714
   31          1          -0.000000369    0.000001144    0.000000446
   32          1           0.000002822   -0.000002852    0.000002324
   33          1          -0.000002602   -0.000002224    0.000004054
   34          1           0.000000774    0.000001610   -0.000000199
 -------------------------------------------------------------------
 Cartesian Forces:  Max     0.000004808 RMS     0.000001895
 ------------------------------------------------------------------------
           Internal Coordinate Forces (Hartree/Bohr or radian)
 Cent Atom N1     Length/X     N2     Alpha/Y      N3      Beta/Z       J
 ------------------------------------------------------------------------
   1  C        -0.000001(   1)      0.000001(  35)      0.000004(  69)
   2  C         0.000000(   2)     -0.000001(  36)      0.000001(  70)
   3  C        -0.000004(   3)     -0.000004(  37)     -0.000005(  71)
   4  O         0.000002(   4)      0.000001(  38)      0.000002(  72)
   5  O         0.000003(   5)      0.000003(  39)      0.000003(  73)
   6  C        -0.000001(   6)      0.000000(  40)     -0.000001(  74)
   7  C        -0.000003(   7)     -0.000003(  41)     -0.000003(  75)
   8  C         0.000000(   8)      0.000000(  42)      0.000003(  76)
   9  C         0.000001(   9)      0.000000(  43)     -0.000004(  77)
  10  C         0.000000(  10)     -0.000001(  44)     -0.000002(  78)
  11  C        -0.000001(  11)      0.000000(  45)     -0.000002(  79)
  12  C         0.000000(  12)      0.000001(  46)     -0.000001(  80)
  13  C         0.000000(  13)      0.000002(  47)     -0.000002(  81)
  14  H         0.000000(  14)     -0.000001(  48)      0.000001(  82)
  15  C        -0.000001(  15)     -0.000002(  49)      0.000004(  83)
  16  C         0.000000(  16)      0.000001(  50)      0.000001(  84)
  17  H         0.000001(  17)     -0.000001(  51)     -0.000004(  85)
  18  H         0.000000(  18)      0.000000(  52)      0.000000(  86)
  19  H         0.000000(  19)      0.000001(  53)     -0.000001(  87)
  20  H         0.000000(  20)      0.000000(  54)     -0.000001(  88)
  21  H         0.000000(  21)      0.000000(  55)      0.000001(  89)
  22  H         0.000001(  22)      0.000000(  56)     -0.000002(  90)
  23  C         0.000003(  23)      0.000001(  57)      0.000003(  91)
  24  H        -0.000001(  24)     -0.000001(  58)     -0.000001(  92)
  25  H        -0.000001(  25)      0.000000(  59)     -0.000002(  93)
  26  H         0.000000(  26)      0.000001(  60)     -0.000002(  94)
  27  H         0.000001(  27)      0.000002(  61)      0.000000(  95)
  28  H         0.000001(  28)     -0.000003(  62)      0.000002(  96)
  29  H        -0.000002(  29)      0.000002(  63)      0.000001(  97)
  30  H         0.000002(  30)      0.000002(  64)      0.000004(  98)
  31  H         0.000000(  31)      0.000001(  65)      0.000000(  99)
  32  H         0.000003(  32)     -0.000003(  66)      0.000002( 100)
  33  H        -0.000003(  33)     -0.000002(  67)      0.000004( 101)
  34  H         0.000001(  34)      0.000002(  68)      0.000000( 102)
 ------------------------------------------------------------------------
 Internal  Forces:  Max     0.000004808 RMS     0.000001895

 GradGradGradGradGradGradGradGradGradGradGradGradGradGradGradGradGradGrad
 Berny optimization.
 Search for a local minimum.
 Step number   1 out of a maximum of   2
 All quantities printed in internal units (Hartrees-Bohrs-Radians)
 Second derivative matrix not updated -- analytic derivatives used.
     Eigenvalues ---    0.00004   0.00017   0.00027   0.00050   0.00075
     Eigenvalues ---    0.00095   0.00200   0.00210   0.00243   0.00286
     Eigenvalues ---    0.00391   0.00649   0.00803   0.00949   0.01332
     Eigenvalues ---    0.01503   0.01518   0.01754   0.01849   0.02474
     Eigenvalues ---    0.03002   0.03142   0.03169   0.03606   0.04287
     Eigenvalues ---    0.04881   0.05260   0.05297   0.05454   0.05677
     Eigenvalues ---    0.05907   0.06197   0.06297   0.07127   0.07343
     Eigenvalues ---    0.07777   0.08225   0.08645   0.08909   0.09372
     Eigenvalues ---    0.10268   0.10625   0.10810   0.10975   0.11286
     Eigenvalues ---    0.11696   0.11928   0.12471   0.13652   0.14976
     Eigenvalues ---    0.15432   0.16610   0.16908   0.18159   0.18588
     Eigenvalues ---    0.19155   0.19558   0.20212   0.21423   0.22787
     Eigenvalues ---    0.24330   0.28323   0.28706   0.31426   0.33853
     Eigenvalues ---    0.39609   0.40656   0.42276   0.44204   0.49230
     Eigenvalues ---    0.55651   0.60587   0.61033   0.66222   0.67526
     Eigenvalues ---    0.68673   0.71499   0.75470   0.76487   0.78376
     Eigenvalues ---    0.78735   0.79632   0.81510   0.81850   0.85650
     Eigenvalues ---    0.86567   0.89150   0.90829   0.93086   0.98912
     Eigenvalues ---    1.07179   1.09418   1.24348   1.25124   1.31792
     Eigenvalues ---    1.58263
 Angle between quadratic step and forces=  79.11 degrees.
 Linear search not attempted -- first point.
 TrRot=  0.000585  0.000424  0.000137  1.940543  0.000135 -1.940478
 Variable       Old X    -DE/DX   Delta X   Delta X   Delta X     New X
                                 (Linear)    (Quad)   (Total)
    X1       -0.29159   0.00000   0.00000   0.00168   0.00221  -0.28938
    Y1        0.54770   0.00000   0.00000   0.00354   0.00400   0.55170
    Z1        0.37363   0.00000   0.00000   0.00015   0.00020   0.37383
    X2        0.79710   0.00000   0.00000   0.00065   0.00105   0.79814
    Y2        2.82411   0.00000   0.00000   0.00378   0.00427   2.82838
    Z2        0.12509   0.00000   0.00000  -0.00124  -0.00142   0.12367
    X3        1.21478   0.00000   0.00000   0.00303   0.00368   1.21846
    Y3       -1.74074   0.00000   0.00000   0.00542   0.00606  -1.73468
    Z3        1.12349   0.00000   0.00000   0.00348   0.00390   1.12739
    X4        0.86950   0.00000   0.00000   0.00842   0.00905   0.87855
    Y4       -2.95984   0.00000   0.00000   0.01235   0.01321  -2.94663
    Z4        3.02589   0.00000   0.00000   0.00889   0.00944   3.03532
    X5        2.99038   0.00000   0.00000  -0.00293  -0.00216   2.98822
    Y5       -2.32811   0.00000   0.00000  -0.00140  -0.00086  -2.32897
    Z5       -0.60760   0.00000   0.00000  -0.00022   0.00036  -0.60724
    X6        6.32318   0.00000   0.00000  -0.01393  -0.01291   6.31027
    Y6       -4.89093   0.00000   0.00000  -0.01238  -0.01183  -4.90276
    Z6       -2.27611   0.00000   0.00000  -0.00532  -0.00426  -2.28037
    X7        4.53365   0.00000   0.00000  -0.00293  -0.00204   4.53161
    Y7       -4.53096   0.00000   0.00000  -0.00095  -0.00024  -4.53120
    Z7       -0.07298   0.00000   0.00000   0.00172   0.00265  -0.07033
    X8        3.53512   0.00000   0.00000   0.00035   0.00068   3.53581
    Y8        3.53347   0.00000   0.00000   0.00423   0.00494   3.53840
    Z8        0.42901   0.00000   0.00000   0.00042   0.00028   0.42929
    X9       -3.05934   0.00000   0.00000   0.00239   0.00296  -3.05638
    Y9        0.16739   0.00000   0.00000   0.00057   0.00080   0.16818
    Z9        0.01023   0.00000   0.00000  -0.00128  -0.00131   0.00892
   X10       -4.49759   0.00000   0.00000   0.00362   0.00421  -4.49338
   Y10       -1.34525   0.00000   0.00000  -0.00142  -0.00108  -1.34633
   Z10        1.64693   0.00000   0.00000  -0.00203  -0.00194   1.64499
   X11       -7.09034   0.00000   0.00000   0.00412   0.00475  -7.08559
   Y11       -1.61846   0.00000   0.00000  -0.00475  -0.00463  -1.62309
   Z11        1.28353   0.00000   0.00000  -0.00314  -0.00315   1.28039
   X12       -8.29725   0.00000   0.00000   0.00346   0.00411  -8.29314
   Y12       -0.40653   0.00000   0.00000  -0.00613  -0.00634  -0.41287
   Z12       -0.71978   0.00000   0.00000  -0.00357  -0.00378  -0.72356
   X13       -6.88382   0.00000   0.00000   0.00228   0.00291  -6.88092
   Y13        1.07802   0.00000   0.00000  -0.00414  -0.00446   1.07355
   Z13       -2.37373   0.00000   0.00000  -0.00281  -0.00315  -2.37687
   X14        4.62785   0.00000   0.00000   0.00080   0.00122   4.62907
   Y14        1.85753   0.00000   0.00000   0.00345   0.00430   1.86183
   Z14        0.94508   0.00000   0.00000  -0.00278  -0.00265   0.94243
   X15        3.83106   0.00000   0.00000  -0.00044  -0.00034   3.83072
   Y15        5.50068   0.00000   0.00000  -0.00010   0.00090   5.50157
   Z15        2.55149   0.00000   0.00000   0.00458   0.00421   2.55570
   X16       -4.29127   0.00000   0.00000   0.00176   0.00236  -4.28891
   Y16        1.35235   0.00000   0.00000  -0.00084  -0.00095   1.35140
   Z16       -2.01818   0.00000   0.00000  -0.00172  -0.00196  -2.02015
   X17       -0.45182   0.00000   0.00000   0.00055   0.00086  -0.45096
   Y17        4.41235   0.00000   0.00000   0.00308   0.00344   4.41579
   Z17       -0.28057   0.00000   0.00000  -0.00364  -0.00408  -0.28465
   X18        7.55204   0.00000   0.00000  -0.01308  -0.01216   7.53988
   Y18       -3.25015   0.00000   0.00000  -0.01492  -0.01432  -3.26447
   Z18       -2.52013   0.00000   0.00000  -0.01813  -0.01722  -2.53735
   X19        5.28710   0.00000   0.00000  -0.02276  -0.02164   5.26546
   Y19       -5.19236   0.00000   0.00000  -0.01847  -0.01821  -5.21057
   Z19       -4.03577   0.00000   0.00000   0.00093   0.00198  -4.03379
   X20        7.51766   0.00000   0.00000  -0.01435  -0.01324   7.50442
   Y20       -6.54375   0.00000   0.00000  -0.01245  -0.01178  -6.55553
   Z20       -1.94231   0.00000   0.00000  -0.00413  -0.00280  -1.94511
   X21        3.28732   0.00000   0.00000  -0.00352  -0.00254   3.28478
   Y21       -6.15377   0.00000   0.00000   0.00163   0.00230  -6.15147
   Z21        0.19220   0.00000   0.00000   0.01469   0.01576   0.20796
   X22        5.53662   0.00000   0.00000   0.00599   0.00677   5.54338
   Y22       -4.21579   0.00000   0.00000   0.00552   0.00652  -4.20927
   Z22        1.70396   0.00000   0.00000  -0.00444  -0.00350   1.70046
   X23        4.59238   0.00000   0.00000   0.00044   0.00082   4.59320
   Y23        4.55137   0.00000   0.00000   0.00964   0.01010   4.56147
   Z23       -2.08346   0.00000   0.00000   0.00269   0.00248  -2.08098
   X24       -3.57965   0.00000   0.00000   0.00404   0.00462  -3.57503
   Y24       -2.28282   0.00000   0.00000  -0.00009   0.00051  -2.28231
   Z24        3.21689   0.00000   0.00000  -0.00144  -0.00119   3.21570
   X25       -8.17257   0.00000   0.00000   0.00505   0.00569  -8.16688
   Y25       -2.78146   0.00000   0.00000  -0.00625  -0.00604  -2.78750
   Z25        2.58142   0.00000   0.00000  -0.00371  -0.00363   2.57779
   X26      -10.31698   0.00000   0.00000   0.00387   0.00455 -10.31243
   Y26       -0.62895   0.00000   0.00000  -0.00871  -0.00909  -0.63803
   Z26       -0.99873   0.00000   0.00000  -0.00450  -0.00479  -1.00352
   X27       -7.79432   0.00000   0.00000   0.00175   0.00240  -7.79192
   Y27        2.00488   0.00000   0.00000  -0.00516  -0.00575   1.99913
   Z27       -3.96134   0.00000   0.00000  -0.00311  -0.00361  -3.96494
   X28        6.57677   0.00000   0.00000   0.00080   0.00114   6.57790
   Y28        5.09509   0.00000   0.00000   0.00793   0.00855   5.10364
   Z28       -1.87576   0.00000   0.00000   0.00360   0.00341  -1.87234
   X29        4.46873   0.00000   0.00000  -0.00068  -0.00013   4.46860
   Y29        3.13325   0.00000   0.00000   0.01339   0.01366   3.14691
   Z29       -3.57872   0.00000   0.00000  -0.00080  -0.00084  -3.57956
   X30        3.54982   0.00000   0.00000   0.00132   0.00162   3.55144
   Y30        6.22691   0.00000   0.00000   0.01178   0.01210   6.23901
   Z30       -2.70724   0.00000   0.00000   0.00698   0.00651  -2.70074
   X31        5.81642   0.00000   0.00000  -0.00092  -0.00086   5.81556
   Y31        6.02742   0.00000   0.00000   0.00186   0.00301   6.03043
   Z31        2.78913   0.00000   0.00000   0.00427   0.00393   2.79307
   X32        3.14283   0.00000   0.00000   0.00176   0.00182   3.14465
   Y32        4.77244   0.00000   0.00000  -0.00504  -0.00386   4.76858
   Z32        4.35734   0.00000   0.00000   0.00341   0.00310   4.36044
   X33        2.77416   0.00000   0.00000  -0.00296  -0.00295   2.77120
   Y33        7.22784   0.00000   0.00000  -0.00050   0.00037   7.22822
   Z33        2.12429   0.00000   0.00000   0.00922   0.00858   2.13287
   X34       -3.19745   0.00000   0.00000   0.00092   0.00151  -3.19595
   Y34        2.46170   0.00000   0.00000   0.00062   0.00041   2.46211
   Z34       -3.35105   0.00000   0.00000  -0.00120  -0.00152  -3.35258
         Item               Value     Threshold  Converged?
 Maximum Force            0.000005     0.000450     YES
 RMS     Force            0.000002     0.000300     YES
 Maximum Displacement     0.021639     0.001800     NO 
 RMS     Displacement     0.006443     0.001200     NO 
 Predicted change in Energy=-9.054321D-08
 GradGradGradGradGradGradGradGradGradGradGradGradGradGradGradGradGradGrad


 Test job not archived.
 1|1|UNPC-UNK|Freq|RB3LYP|6-311+G(d)|C14H18O2|PCUSER|14-Jul-2019|0||# F
 REQ RB3LYP/6-311+G(D) GEOM=CONNECTIVITY TEST||[No Title]||0,1|C,-0.154
 3030508,0.289832,0.1977179915|C,0.4218049492,1.494454,0.0661959915|C,0
 .6428339492,-0.921159,0.5945269915|O,0.4601199492,-1.566282,1.60122999
 15|O,1.5824419492,-1.231984,-0.3215290085|C,3.3460809492,-2.588169,-1.
 2044660085|C,2.3991059492,-2.39768,-0.0386200085|C,1.8707069492,1.8698
 3,0.2270199915|C,-1.6189320508,0.088577,0.0054149915|C,-2.3800200508,-
 0.711874,0.8715189915|C,-3.7520480508,-0.856452,0.6792159915|C,-4.3907
 140508,-0.215124,-0.3808910085|C,-3.6427630508,0.570461,-1.2561230085|
 H,2.4489529492,0.982963,0.5001169915|C,2.0273099492,2.910832,1.3501899
 915|C,-2.2708430508,0.715633,-1.0679750085|H,-0.2390920508,2.334915,-0
 .1484700085|H,3.9963689492,-1.719906,-1.3335980085|H,2.7978149492,-2.7
 4768,-2.1356380085|H,3.9781759492,-3.462803,-1.0278260085|H,1.73957394
 92,-3.256433,0.1017099915|H,2.9298509492,-2.230902,0.9016969915|C,2.43
 01839492,2.40848,-1.1025180085|H,-1.8942710508,-1.208014,1.7023039915|
 H,-4.3247390508,-1.471886,1.3660259915|H,-5.4595110508,-0.332824,-0.52
 85060085|H,-4.1245780508,1.060936,-2.0962490085|H,3.4802749492,2.69620
 6,-0.9926090085|H,2.3647489492,1.658045,-1.8937750085|H,1.8784839492,3
 .29514,-1.4326120085|H,3.0779189492,3.189573,1.4759449915|H,1.66311194
 92,2.525468,2.3058029915|H,1.4680199492,3.824809,1.1241269915|H,-1.692
 0200508,1.302675,-1.7733010085||Version=x86-Win32-G03RevB.05|State=1-A
 |HF=-694.9487357|RMSD=9.283e-009|RMSF=1.895e-006|Dipole=0.5808705,0.18
 30226,-0.607963|DipoleDeriv=0.034957,0.1037303,0.0358129,-0.0999396,-0
 .2059142,0.0392655,-0.0372202,-0.0221027,-0.1344581,0.112228,0.2176197
 ,-0.0006708,0.0265848,0.1654219,-0.0414517,-0.0149454,-0.1014076,-0.18
 85506,1.136816,-0.7248963,-0.4739562,-0.4589551,1.1657556,-0.2969293,-
 0.8116363,0.0467442,1.2350576,-0.6181728,0.2081739,0.0701194,0.0043824
 ,-0.7497416,0.3529091,0.3154531,0.1579912,-0.8705151,-1.1616309,0.6516
 235,0.4408157,0.6562051,-0.9217469,-0.1493144,0.5321983,-0.2235695,-0.
 6733225,0.0205271,0.0517351,0.0735728,0.037349,0.0848103,-0.0198809,0.
 0743807,-0.0210855,0.0291167,0.672552,-0.3225744,-0.0989996,-0.4098788
 ,0.7061434,0.1205353,-0.0015683,0.0212627,0.3217524,0.1073771,0.035532
 3,-0.0122781,-0.0454013,0.0569842,0.0202639,0.0768222,0.0614131,0.1739
 549,0.322774,0.0333302,0.0573926,0.2182233,-0.0869348,0.0209078,0.0817
 559,0.0831521,0.0243578,-0.1715552,-0.0678776,0.0404506,-0.0064271,-0.
 0624044,-0.049621,0.0484023,-0.0642303,-0.040037,0.03411,0.0802978,-0.
 069123,0.0506512,-0.0508747,-0.1224537,-0.0768752,-0.1211773,0.0073334
 ,0.0222368,0.007297,0.0271371,0.0308884,-0.1097561,-0.0463855,0.006678
 6,-0.0500766,-0.0737315,-0.0267088,-0.0295006,0.0764665,-0.0214582,-0.
 0635259,-0.105015,0.0805559,-0.0957209,0.0380869,-0.0509193,0.0424753,
 -0.0087622,0.076322,-0.082867,0.0381727,-0.0243187,0.0487299,-0.021739
 4,0.0180118,-0.1158951,0.0043618,0.0130838,0.1175768,-0.028429,0.05579
 41,-0.0062173,0.0299125,-0.1098049,0.0265147,-0.056619,-0.0068829,-0.0
 936778,-0.0679518,-0.0416415,-0.0578148,-0.0376755,-0.0121709,0.052106
 6,-0.0194754,0.0949425,-0.0604447,0.0333113,-0.0427025,0.0337012,0.095
 9092,0.0055307,-0.0824806,0.0251473,-0.1284564,-0.0561356,0.0294042,0.
 0251032,-0.0183003,0.0377321,0.0021063,-0.0267845,-0.100685,-0.0249302
 ,0.0814151,-0.0101544,-0.0348862,-0.0401354,-0.087396,-0.0167877,0.110
 3372,0.0102552,0.1287898,-0.0753404,0.0161728,-0.0089792,0.0390573,0.0
 508255,-0.0680679,-0.0731751,0.040935,0.0153727,-0.0892181,-0.0103189,
 0.004575,0.0252677,0.0434509,-0.0379083,0.0450705,-0.0262544,0.0273883
 ,-0.0132184,-0.0821717,-0.0826642,0.0001475,-0.0884892,0.0009332,-0.11
 69757,0.0320721,-0.0234349,0.1112497,-0.0182424,-0.0692263,-0.0703497,
 0.0077438,0.1229883,0.0077232,-0.0444189,0.0110014,0.0910575,0.05734,-
 0.0470209,0.0564696,0.0408742,-0.0077275,-0.0713274,0.0518723,-0.08011
 67,0.0476726,0.0999855,0.0683582,0.1019687,0.014907,-0.136692,-0.03257
 07,-0.0338195,-0.0298014,0.1138225,0.0301236,-0.035308,0.0279584,0.092
 9243,0.0071606,0.0213779,-0.0698637,0.0386222,0.077878,0.0985821,-0.08
 92808,0.0989392,-0.028216,-0.1996003,-0.1122139,0.0109047,-0.0894818,0
 .0258201,0.0199474,-0.000927,0.0350556,0.0441241,0.0758765,-0.0098146,
 -0.0108726,0.0034844,-0.0263018,-0.1160033,0.0038208,-0.0873135,-0.074
 2618,0.0092377,0.135738,-0.0427141,0.0715564,-0.0846969,0.0762809,0.00
 47658,0.0258178,0.0306708,-0.1827434,-0.1050109,-0.0507399,-0.0803584,
 -0.0035714,-0.0375344,-0.0296219,-0.0497647,0.054319,0.0587609,-0.0112
 268,0.0759232,-0.020062,0.030041,0.0737379,0.0554731,0.0279531,-0.1141
 069,0.0136555,0.1288496,-0.0213974,0.0712861,-0.0961407,-0.0041599,-0.
 0480764,0.0680596,0.0303971,0.0226503,-0.0572082,0.0674109,-0.050549,0
 .056863,0.0790773,0.062762,0.0695769,0.029049|Polar=216.8072134,15.920
 2886,164.4033468,0.8502129,-15.012025,144.8181684|PG=C01 [X(C14H18O2)]
 |NImag=0||0.54720437,0.10928704,0.69921510,0.02407245,-0.11004947,0.20
 353227,-0.17409060,-0.13922854,0.00895074,0.58389326,-0.14988797,-0.42
 336320,0.04471849,0.07678785,0.77104294,0.00553390,0.03731170,-0.05868
 430,0.04783154,-0.08626644,0.18048726,-0.12741877,0.04152779,-0.017470
 76,0.02240545,-0.00732149,0.00183024,0.42430291,0.03858488,-0.14605080
 ,0.02034389,0.00694510,-0.03296737,0.01238030,-0.09441203,0.57948959,-
 0.01333536,0.01541726,-0.07489551,-0.00000706,0.00432075,0.00146269,-0
 .12222177,-0.28375607,0.70349745,0.02029675,0.01017439,-0.00970952,-0.
 00395054,0.00320268,-0.00208797,-0.10416997,-0.02782758,0.06780721,0.0
 9681664,-0.00069901,-0.02024610,0.03973318,0.00724698,0.00232793,0.000
 07207,-0.02791673,-0.28038863,0.28068315,0.03232221,0.27472459,0.00359
 466,0.02761664,-0.01364938,-0.00626752,0.00003895,0.00086353,0.0649313
 7,0.28091383,-0.49652813,-0.11989322,-0.33319114,0.58732120,-0.0201816
 0,0.02059462,0.01793714,-0.00655454,-0.00068528,0.00040236,-0.15496760
 ,0.04061147,0.07396509,-0.00607880,-0.01067834,0.06350217,0.30205290,0
 .03234040,-0.00881576,-0.01840940,0.00167646,0.00040635,0.00003570,0.0
 5239817,-0.11213398,-0.01302010,-0.01198927,0.02872974,0.01600518,-0.1
 4579383,0.28543514,0.00319416,-0.00087413,0.00690141,0.00104300,0.0004
 3108,-0.00059548,0.06573878,-0.00121826,-0.14888494,0.06147493,0.01668
 573,-0.07570362,-0.13059555,-0.04065265,0.30779014,-0.00059789,0.00015
 096,0.00056718,-0.00001022,0.00003396,-0.00006285,-0.00021400,0.002792
 72,-0.00292727,0.00071698,-0.00065217,0.00115297,-0.02330129,0.0136548
 6,0.01880354,0.54147586,0.00114529,-0.00010186,-0.00109445,0.00027392,
 0.00012373,0.00009543,0.00000361,-0.00544256,0.00613482,-0.00048649,0.
 00294795,-0.00160854,0.03289173,-0.01502042,-0.02782257,0.00821171,0.5
 7459378,-0.00038438,-0.00007664,0.00063725,-0.00017622,-0.00000564,-0.
 00006966,-0.00025537,0.00287524,-0.00313644,0.00080907,-0.00127642,0.0
 0139314,-0.00535384,0.00029648,0.00881385,0.04127842,-0.01100874,0.528
 69096,0.00279620,0.00199152,0.00361189,-0.00035724,0.00070649,-0.00026
 212,-0.03541115,0.02944428,0.01411705,0.00169048,0.00171436,-0.0132845
 7,-0.08735855,0.02398142,-0.00481775,-0.12580619,-0.00600531,0.0652085
 8,0.52279897,0.00093369,0.00491816,0.00235258,-0.00127077,0.00022129,0
 .00013118,0.02968701,-0.01341645,-0.02446740,-0.00889968,-0.00695802,0
 .01293541,0.03486440,-0.13017668,0.02576634,-0.00001632,-0.07752557,-0
 .01251631,0.10073086,0.48913453,0.00508688,0.00210057,-0.00083326,-0.0
 0049551,0.00033327,0.00035166,0.01297433,-0.02461469,0.01164639,0.0004
 2066,-0.00193299,-0.00444745,-0.01713923,0.03958521,-0.09419390,0.0576
 4219,-0.00376782,-0.16842081,0.01319415,0.01662125,0.57448407,-0.00973
 492,-0.00838942,-0.00007507,-0.19634279,-0.01643298,-0.01710450,0.0041
 6537,-0.00055672,0.00016978,-0.00099501,0.00081159,-0.00013213,-0.0029
 8419,-0.00103470,-0.00002020,0.00002548,0.00009485,-0.00006153,-0.0001
 6612,0.00014266,0.00004713,0.51549794,-0.02881949,-0.00593499,-0.00259
 451,-0.01679769,-0.09179812,0.00105725,-0.00411090,0.00181575,-0.00133
 657,0.00050916,-0.00051999,0.00009587,0.00119721,-0.00109945,-0.000041
 72,0.00000164,-0.00010843,0.00004386,-0.00001377,-0.00030764,-0.000388
 38,-0.06558534,0.54855833,0.00119304,0.00324296,0.00564189,-0.01848005
 ,-0.00017806,-0.07085610,0.00364911,-0.00266558,-0.00661696,-0.0007488
 9,0.00192947,-0.00031003,-0.00074209,-0.00239664,0.00009169,0.00003671
 ,-0.00005335,0.00003867,0.00000715,0.00048257,0.00001173,0.02843480,-0
 .03294026,0.43859840,-0.19719534,-0.01538112,-0.01969235,-0.02468218,-
 0.02066853,0.00339296,-0.02150916,0.01153029,-0.01153041,-0.00045488,-
 0.00356053,0.00461657,0.00297930,-0.00263199,-0.00132910,0.00009177,-0
 .00015157,0.00011437,-0.00038121,0.00126606,0.00015043,0.00251346,0.00
 130590,-0.00105205,0.60117745,-0.01208370,-0.08471578,0.01638042,-0.03
 543139,-0.00453352,-0.00296312,0.02276934,0.01104180,0.00125159,-0.002
 32085,-0.00250698,0.00110713,0.00347364,-0.00539055,-0.00057128,0.0001
 5181,-0.00044022,0.00022602,-0.00090056,0.00011510,-0.00119693,0.00063
 812,-0.00258907,0.00214241,0.06712557,0.35713388,-0.02218437,0.0165330
 9,-0.07624391,0.00209886,-0.00242977,0.00552657,-0.00971153,-0.0040123
 1,0.00033048,0.00235427,0.00080636,-0.00012364,-0.00063104,0.00087573,
 0.00068617,0.00000537,0.00009839,-0.00004407,0.00015494,-0.00043595,0.
 00026690,-0.00176688,0.00333201,0.01137725,0.04695314,-0.22654145,0.46
 619744,-0.02562560,-0.02262425,0.01890219,-0.00192095,0.00498112,-0.00
 083994,0.00020248,-0.00168683,0.00029100,-0.00382623,0.00059874,0.0001
 4160,-0.00043133,0.00053412,0.00047913,-0.00001818,0.00001732,-0.00001
 680,0.00014008,-0.00025034,-0.00004364,0.00054233,-0.00184067,-0.00185
 778,-0.16949485,-0.04309602,0.02919383,0.66764182,-0.01256102,-0.00198
 346,0.00044099,0.00224434,0.00378759,0.00005576,0.00103434,0.00008433,
 -0.00052812,-0.00041928,0.00033636,0.00072653,-0.00082018,0.00056665,0
 .00083312,-0.00001580,0.00003313,-0.00002742,0.00004501,-0.00015491,0.
 00003020,-0.00050907,-0.00006081,-0.00025479,-0.07206291,-0.14808257,0
 .08852104,0.04688898,0.33528083,0.00227228,-0.00370800,0.00848997,-0.0
 0375562,-0.00107472,0.00058104,-0.00115228,-0.00120466,0.00308055,0.00
 221931,0.00170843,-0.00111882,0.00061517,-0.00035000,-0.00161284,-0.00
 000578,0.00001195,0.00000537,-0.00020675,0.00012306,-0.00005666,0.0001
 6191,-0.00050699,-0.00052436,0.07504432,0.09863611,-0.17479369,0.09022
 570,-0.26288321,0.52311864,0.00533415,-0.00103654,0.00128862,-0.001857
 12,-0.00187345,-0.00017253,-0.00033191,0.00008469,-0.00012292,0.000145
 16,0.00026151,-0.00024286,0.00026166,-0.00012889,-0.00004515,0.0000074
 9,-0.00000443,0.00000881,-0.00008769,0.00007343,-0.00000717,0.00006532
 ,0.00026814,0.00027096,-0.03276400,-0.04686884,0.05311268,-0.32607718,
 -0.01022222,-0.06005883,0.66582544,-0.00268667,0.00217415,0.00539166,0
 .00043604,0.00042238,0.00030118,-0.00030511,-0.00124576,0.00126445,0.0
 0105414,0.00072111,-0.00078357,0.00018414,0.00011451,-0.00041832,-0.00
 000941,0.00000620,-0.00000030,-0.00009138,0.00011006,0.00001727,0.0001
 7684,-0.00029591,-0.00106061,-0.02035057,0.00843695,-0.00904903,-0.047
 59116,-0.08756142,0.02371319,0.09031889,0.34848187,0.00204531,0.005317
 31,-0.00103313,0.00119015,-0.00064877,0.00000478,-0.00000856,0.0007632
 9,-0.00178254,-0.00136689,-0.00014957,0.00065684,-0.00033378,0.0001645
 5,0.00071204,0.00000099,-0.00000167,-0.00000291,0.00014025,-0.00009175
 ,0.00004120,-0.00002471,0.00039098,0.00035441,0.01662269,-0.01748643,0
 .03534011,-0.00891295,0.03460916,-0.11197620,0.02625751,-0.27203033,0.
 51418601,-0.00169349,-0.00108559,-0.00047259,0.00016528,0.00098407,-0.
 00081478,0.00039099,-0.00084699,0.00027644,-0.00035930,0.00036022,-0.0
 0007371,-0.00043401,0.00045823,0.00018018,-0.00002540,0.00002843,-0.00
 002818,0.00011303,-0.00020472,0.00003385,0.00008299,-0.00009403,0.0004
 2291,0.00228363,-0.00043610,0.00424813,-0.02184934,0.01447086,-0.02928
 093,-0.17065789,0.05172968,-0.10219642,0.72220383,0.00062228,-0.001059
 14,-0.00030115,-0.00036405,-0.00024937,-0.00044434,-0.00010890,-0.0000
 0941,0.00013803,-0.00004675,0.00003689,-0.00011341,-0.00000415,0.00004
 916,0.00004524,-0.00000028,0.00000583,-0.00000284,0.00000656,-0.000050
 32,-0.00000496,-0.00006993,0.00012296,0.00032562,-0.00079446,-0.028227
 89,0.02927543,0.04164474,0.02300775,-0.00930462,0.01521430,-0.12975804
 ,0.09683151,0.07859504,0.32256627,-0.00072552,-0.00011824,-0.00082199,
 0.00041853,0.00078729,0.00057126,0.00046057,-0.00005872,-0.00033424,-0
 .00028929,-0.00011972,0.00014549,-0.00013526,0.00005478,0.00007242,-0.
 00000332,0.00000602,-0.00000842,0.00004735,-0.00006837,-0.00001230,0.0
 0007120,-0.00027987,-0.00018048,0.00334195,0.02998049,-0.04648207,-0.0
 6627093,-0.01745377,0.01252533,-0.05098831,0.10771678,-0.22338453,0.06
 121433,-0.24192896,0.48149340,0.00321552,0.00124990,-0.00119524,-0.000
 25593,-0.00000808,0.00115431,0.00046687,0.00033050,-0.00140553,-0.0004
 2982,-0.00021812,0.00041958,0.00002042,-0.00014855,0.00019645,0.000002
 64,-0.00001119,-0.00000525,0.00002443,0.00001956,-0.00002346,0.0001865
 9,-0.00038038,-0.00028329,-0.02263851,0.04185719,-0.06476042,-0.052514
 79,-0.02116408,0.01670311,0.06297930,-0.00916508,0.02905047,-0.1859066
 3,-0.05282438,0.03543687,0.65991226,0.00139117,0.00348567,0.00459957,0
 .00054042,-0.00093892,0.00070858,0.00020455,-0.00013545,-0.00036315,-0
 .00014083,0.00022626,-0.00004446,-0.00004261,0.00004207,-0.00003254,-0
 .00000850,0.00000234,-0.00000732,0.00004191,0.00002053,0.00000906,0.00
 007305,0.00019621,-0.00056206,0.01255742,0.02206494,-0.01647485,-0.021
 73979,-0.01412805,0.00434978,0.01738331,-0.01456517,0.03673058,-0.0888
 6711,-0.15043995,0.09701037,0.05637844,0.33416038,-0.00141990,0.006281
 65,-0.00104000,0.00061693,-0.00042663,0.00083983,-0.00103320,-0.000747
 22,-0.00062928,0.00004247,0.00002602,0.00009062,-0.00032766,0.00042202
 ,0.00032689,-0.00001224,0.00003006,-0.00003347,0.00007857,0.00001970,0
 .00011124,-0.00012715,0.00003250,-0.00025277,-0.02812651,-0.01045143,0
 .01160252,0.01766063,0.00494421,-0.00787030,-0.00878219,0.02913302,-0.
 03445229,0.08701157,0.10839612,-0.18692340,0.07538619,-0.26940283,0.53
 321270,0.00195707,0.00055996,0.00024438,-0.02065673,0.02790545,-0.0087
 4883,-0.00284411,-0.00071329,0.00082959,0.00050186,-0.00042168,-0.0000
 2929,0.00132964,0.00066177,-0.00013778,0.00002551,0.00005825,-0.000018
 19,0.00066500,-0.00059369,-0.00006565,-0.12222643,0.10772197,-0.034251
 71,-0.00012611,-0.00014852,0.00027415,0.00007195,0.00008636,-0.0001324
 2,-0.00008742,-0.00003200,-0.00003733,-0.00004879,-0.00003927,0.000071
 88,0.00012543,-0.00007345,0.00005577,0.13558408,0.00005230,0.00047542,
 -0.00007078,-0.00421560,0.00767669,-0.00250125,-0.00081617,-0.00093844
 ,0.00052689,-0.00002063,0.00027317,-0.00047556,-0.00117879,-0.00319845
 ,-0.00111389,0.00004712,0.00005345,-0.00004968,-0.00005313,-0.00033949
 ,-0.00007862,0.11132883,-0.21712859,0.05359488,0.00008582,0.00015881,-
 0.00010910,0.00006791,-0.00000727,0.00003904,0.00000208,0.00000300,-0.
 00001652,0.00000634,0.00000309,0.00000943,0.00001009,-0.00001275,-0.00
 000946,-0.11653096,0.24120138,0.00033480,-0.00048765,-0.00013614,-0.00
 168722,0.00297944,-0.00162326,-0.00213221,0.00034618,0.00185241,0.0003
 4298,0.00004203,-0.00076503,0.00138461,0.00032481,-0.00035620,-0.00012
 617,-0.00007936,-0.00001801,0.00043004,-0.00055201,0.00016484,-0.03441
 964,0.05176040,-0.06322947,0.00005450,-0.00010082,-0.00005453,-0.00002
 027,-0.00001558,-0.00001497,0.00002136,0.00000103,0.00002779,-0.000008
 80,0.00001059,-0.00003246,-0.00004507,0.00000466,0.00004227,0.03589845
 ,-0.05572779,0.07289291,-0.00335526,0.00029512,-0.00040083,-0.00729545
 ,-0.02688688,-0.02562539,-0.00227372,0.00181524,-0.00086391,0.00060243
 ,-0.00072783,0.00031810,0.00163082,-0.00007604,-0.00012493,-0.00001078
 ,-0.00009104,0.00004480,0.00010659,-0.00001974,-0.00004821,-0.07713292
 ,-0.00385342,-0.01116825,-0.00008801,-0.00032475,0.00276833,-0.0008743
 9,0.00016612,-0.00036458,0.00003195,-0.00028287,0.00009505,-0.00009530
 ,0.00005235,-0.00007629,-0.00013606,0.00000284,0.00003720,0.00227792,0
 .01113524,0.01308707,0.56653966,0.00082364,0.00173328,-0.00077977,-0.0
 1084988,-0.01122882,-0.00803019,0.00121182,-0.00072661,-0.00094535,-0.
 00020563,0.00031754,0.00020437,-0.00084808,-0.00054504,0.00005108,0.00
 000005,0.00002446,0.00000518,-0.00011969,0.00013291,0.00001046,0.00043
 947,-0.12306670,-0.04824812,-0.00045925,0.00001592,0.00035818,0.000034
 05,0.00005490,-0.00001589,-0.00003029,-0.00001786,0.00004372,0.0000937
 9,0.00000966,0.00000126,-0.00001205,-0.00005381,-0.00004106,-0.0036730
 2,-0.01953472,-0.02205201,-0.00464471,0.51241069,0.00173968,0.00158974
 ,-0.00051043,-0.00894331,-0.00663340,-0.00454489,-0.00041625,-0.000983
 33,0.00115063,-0.00002182,0.00039687,-0.00071148,0.00029730,0.00096673
 ,0.00004951,-0.00001423,0.00001864,-0.00002417,0.00028121,-0.00036641,
 0.00001291,-0.00447256,-0.04525004,-0.12460487,-0.00020305,0.00008701,
 -0.00031016,0.00021592,0.00000100,0.00010626,0.00003891,0.00001840,-0.
 00000301,0.00008478,0.00002845,-0.00001671,-0.00005813,-0.00001057,-0.
 00001064,0.00132730,0.00343764,0.00462169,-0.01203189,-0.05725269,0.51
 365630,-0.02828238,0.01208536,-0.02732105,0.00031166,0.00426893,-0.003
 23967,-0.00267789,-0.00600912,0.00095888,0.00113702,0.00194742,-0.0012
 9733,-0.00116588,0.00160714,0.00043627,-0.00004690,0.00012583,-0.00007
 572,0.00026730,-0.00027836,0.00026539,-0.00029292,0.00013510,0.0014253
 2,-0.15271887,0.01047266,-0.04281613,0.06050980,0.01482423,-0.00744416
 ,-0.04718185,0.01225833,-0.02880171,-0.03241589,-0.04771540,0.05566090
 ,-0.32648277,-0.01156136,-0.05983139,0.00000996,-0.00006272,0.00004725
 ,0.00007248,0.00018455,0.00014823,0.67614943,0.00532890,0.00819670,-0.
 00229464,-0.00369211,-0.00290171,0.00057327,-0.00093583,-0.00094503,-0
 .00005720,0.00018878,0.00011692,-0.00004606,-0.00027992,0.00056992,0.0
 0011587,-0.00002812,0.00002817,-0.00004245,0.00012399,-0.00011821,0.00
 008664,0.00034987,0.00030161,0.00031128,0.04216660,-0.12315961,0.09235
 648,-0.00877436,-0.01251393,0.02916338,0.01140506,-0.00777052,0.004358
 33,-0.01995021,0.00985436,-0.00873885,-0.04927407,-0.08715761,0.023074
 07,-0.00010720,-0.00001662,0.00001686,-0.00016681,-0.00002126,0.000064
 07,0.09628281,0.32882912,-0.01087742,-0.00031934,-0.00052236,0.0014906
 4,0.00213699,-0.00181153,0.00111754,-0.00052317,0.00155307,0.00012408,
 -0.00003712,-0.00008904,-0.00008974,0.00007270,-0.00017516,-0.00001814
 ,-0.00000794,-0.00000168,-0.00015344,-0.00013558,-0.00010381,-0.000133
 14,0.00043239,-0.00008238,-0.09036816,0.08478217,-0.21056432,0.0263229
 2,0.03458494,-0.03364985,-0.02670898,0.00424762,-0.02029199,0.01761214
 ,-0.01550128,0.03497679,-0.00882744,0.03329829,-0.11136025,-0.00015423
 ,-0.00003322,-0.00001229,0.00013383,0.00000275,0.00003132,0.01776715,-
 0.25708256,0.51043183,0.00874450,-0.01233651,0.00186455,-0.15291061,0.
 12611698,-0.03300105,-0.00199562,-0.00217390,-0.00164023,0.00050794,0.
 00011959,0.00057584,0.00092788,-0.00016131,-0.00000242,-0.00000481,-0.
 00005217,0.00002813,0.00010918,0.00003804,-0.00001960,-0.01777379,0.02
 377029,-0.00689794,0.00021090,-0.00115983,0.00114426,-0.00000168,-0.00
 012688,-0.00008800,0.00009386,-0.00005080,0.00004133,0.00001301,0.0001
 4857,-0.00010909,-0.00028541,-0.00010223,0.00017022,-0.00504987,-0.002
 10515,-0.00061702,0.00107269,0.00131810,0.00076071,-0.00001853,-0.0002
 7026,-0.00044965,0.16470282,0.01872825,-0.02395165,0.00673173,0.120226
 13,-0.21064561,0.04138736,-0.00527959,-0.00039417,0.00081460,0.0012855
 2,-0.00202329,0.00186830,0.00097766,-0.00038588,-0.00028604,0.00001693
 ,-0.00006021,0.00004822,-0.00017886,0.00035367,-0.00005234,-0.00485170
 ,0.00527933,-0.00108628,0.00181616,0.00076802,-0.00087083,-0.00048046,
 -0.00010009,0.00025347,0.00034205,0.00004357,0.00007728,0.00004962,0.0
 0012176,-0.00029168,-0.00044425,0.00036199,-0.00014061,-0.00181029,0.0
 0039577,-0.00020448,-0.00031469,0.00120716,0.00008496,-0.00038399,0.00
 001269,0.00062578,-0.13055223,0.22828819,0.00143255,0.00716947,0.00459
 515,-0.03348014,0.03991380,-0.04940218,-0.00089318,0.00215731,0.011411
 42,0.00098817,-0.00278138,0.00007646,-0.00154662,0.00101359,-0.0005769
 6,-0.00007109,0.00012036,-0.00007390,-0.00052051,-0.00025490,-0.000084
 87,-0.00265305,0.00259372,0.00148603,-0.00119806,-0.00161307,-0.006987
 90,0.00186584,0.00055270,-0.00013166,-0.00074321,0.00064332,-0.0004587
 7,-0.00009795,-0.00050694,0.00063675,0.00089564,0.00049332,-0.00036131
 ,-0.00083975,-0.00025088,0.00121400,0.00022421,0.00118584,0.00071995,-
 0.00148404,-0.00134624,0.00027076,0.03901287,-0.04767727,0.03773715,0.
 00000301,-0.00000389,-0.00003224,-0.00010685,-0.00003952,-0.00001509,-
 0.00033324,-0.00023132,0.00093107,-0.00007398,0.00069587,-0.00051047,0
 .00186272,-0.00063100,-0.00120396,-0.13983067,-0.12353128,0.01590216,-
 0.01468027,-0.01804320,0.00278979,-0.00010635,0.00008417,-0.00002139,-
 0.00003447,0.00000866,-0.00001493,0.00001815,0.00000084,0.00001934,0.0
 0000378,0.00001375,0.00000107,0.00001296,0.00000421,0.00000167,-0.0000
 0271,0.00000185,-0.00000996,0.00001080,-0.00001437,0.00013710,0.000074
 22,-0.00000612,0.00000411,0.00000416,0.00000143,0.00001956,0.00002699,
 0.00001010,0.00001413,0.14978340,-0.00009335,-0.00000126,0.00004596,-0
 .00005744,-0.00002954,-0.00000039,0.00033962,0.00008439,-0.00057982,0.
 00001362,-0.00014838,0.00013788,-0.00075780,0.00189668,0.00037633,-0.1
 2552055,-0.21665425,0.02300297,0.00462739,0.00384977,-0.00029197,0.000
 00336,-0.00001596,0.00000772,0.00002660,0.00006065,-0.00001138,-0.0000
 0571,-0.00000163,0.00000665,0.00000376,0.00000890,-0.00000208,-0.00000
 409,-0.00000006,-0.00000190,0.00000030,0.00000059,-0.00000217,-0.00001
 493,-0.00002274,-0.00003602,-0.00000049,-0.00000146,-0.00001192,-0.000
 01984,-0.00000805,0.00000804,0.00000273,0.00001547,-0.00000977,0.13700
 891,0.23230210,0.00000723,0.00001941,0.00002972,0.00005481,0.00005564,
 -0.00001138,0.00001458,0.00037197,-0.00054881,0.00017140,-0.00060231,0
 .00003747,-0.00207771,0.00006916,0.00130681,0.01548502,0.02065529,-0.0
 5247535,0.01739456,0.02478456,-0.00343307,0.00007069,-0.00016308,0.000
 05945,-0.00000937,-0.00002173,0.00000651,0.00000079,0.00000630,-0.0000
 1753,-0.00000475,-0.00000601,0.00000341,0.00000225,-0.00000043,0.00000
 349,0.00000512,0.00000236,0.00000354,0.00002364,0.00001710,-0.00005587
 ,-0.00001595,0.00003132,-0.00002685,-0.00000035,-0.00000550,0.00000067
 ,-0.00002466,-0.00001411,-0.00000656,-0.02132083,-0.02454948,0.0550159
 4,0.00004797,-0.00000925,-0.00005700,0.00001873,0.00000316,0.00000326,
 -0.00035007,-0.00034259,0.00084977,-0.00027999,0.00033805,-0.00033474,
 0.00209219,-0.00139453,-0.00116050,-0.11869009,-0.02096174,-0.11594305
 ,0.01259184,0.00438364,0.02140491,0.00000077,0.00003026,-0.00001720,-0
 .00001455,-0.00002533,0.00000501,0.00000073,-0.00000873,0.00000550,-0.
 00000440,-0.00000294,-0.00000038,0.00000298,-0.00000068,-0.00000096,-0
 .00000552,0.00000154,-0.00000218,-0.00000580,-0.00001441,0.00002555,-0
 .00000980,-0.00001005,0.00001582,0.00001163,0.00000530,-0.00000863,0.0
 0000346,-0.00000504,0.00000902,-0.00995283,-0.00108625,-0.01542438,0.1
 2567936,0.00001336,0.00004356,0.00004555,-0.00003910,-0.00004819,0.000
 02118,0.00051904,0.00004313,-0.00062488,-0.00009740,-0.00030362,0.0004
 0677,-0.00112998,0.00060784,0.00008809,-0.02099126,-0.05459054,-0.0320
 8189,-0.00120014,-0.00196938,-0.00395406,-0.00002467,0.00006939,-0.000
 03214,0.00003894,0.00002272,-0.00000351,-0.00001001,0.00000137,-0.0000
 0348,-0.00000121,-0.00000459,-0.00000326,-0.00000702,-0.00000229,-0.00
 000208,0.00000469,-0.00000192,0.00000919,-0.00002136,-0.00001315,0.000
 01824,0.00000291,-0.00002396,0.00001239,-0.00000278,0.00001519,-0.0000
 0530,0.00001152,0.00000699,-0.00001406,-0.01287744,-0.00312868,-0.0232
 6116,0.02213463,0.05309242,-0.00004373,-0.00003789,-0.00004056,0.00004
 889,-0.00003992,0.00002694,0.00025187,0.00032375,-0.00050709,0.0002915
 4,-0.00042154,0.00041839,-0.00058938,0.00072095,0.00238179,-0.11290406
 ,-0.03281742,-0.23656853,-0.01477185,-0.00361690,-0.02486521,-0.000031
 12,0.00006388,-0.00003412,-0.00004901,-0.00003512,-0.00000024,0.000015
 42,0.00002128,-0.00001316,-0.00000174,0.00000095,0.00000960,0.00001415
 ,0.00000272,0.00000791,0.00001013,0.00000359,0.00001256,0.00001737,-0.
 00000723,-0.00000198,0.00000419,-0.00000995,0.00000970,0.00002174,0.00
 001592,0.00000712,0.00000567,-0.00002206,0.00000431,0.00235247,-0.0001
 0815,0.00450738,0.12277425,0.03588745,0.25919164,-0.00026787,-0.000051
 41,0.00025816,-0.00011981,-0.00004343,-0.00002524,0.00100748,0.0009837
 9,-0.00180132,-0.00017819,-0.00054934,0.00068949,-0.00386664,0.0015256
 1,0.00525297,-0.13446606,0.12009048,-0.02333462,-0.01079763,0.01558731
 ,-0.00736102,-0.00002421,0.00000968,0.00002101,0.00008676,0.00016017,-
 0.00003003,-0.00002160,-0.00001498,0.00000870,0.00000921,0.00000350,-0
 .00001290,-0.00001977,-0.00000150,-0.00000579,0.00000101,-0.00000478,-
 0.00001025,-0.00002639,-0.00001237,0.00000815,0.00003245,-0.00000055,-
 0.00001988,-0.00004981,-0.00001348,0.00001426,0.00001296,0.00003696,-0
 .00002835,0.01345993,-0.01562943,0.00319866,-0.00982179,0.01263731,-0.
 00167956,0.14425885,-0.00005185,-0.00002309,-0.00004997,0.00004837,-0.
 00000850,-0.00000647,-0.00065618,0.00043377,0.00100735,0.00015826,0.00
 011290,-0.00053204,0.00101612,0.00094321,-0.00139934,0.12119847,-0.215
 10263,0.03425547,0.00066904,-0.00422799,0.00150283,-0.00002983,0.00003
 897,-0.00001091,-0.00005297,-0.00004302,-0.00000089,0.00002027,0.00000
 382,-0.00000196,-0.00000622,-0.00000604,0.00000713,0.00001405,0.000000
 63,0.00000414,0.00000087,0.00000355,-0.00000374,0.00001788,-0.00000082
 ,0.00006306,0.00001882,0.00000402,0.00001456,0.00001760,0.00000262,-0.
 00000221,0.00000590,-0.00002099,0.00001926,0.01543608,-0.01951938,0.00
 400657,-0.00406559,0.00511231,0.00008547,-0.13399469,0.23189313,0.0003
 0206,-0.00003806,-0.00040935,0.00011817,0.00000538,0.00004411,0.000195
 97,-0.00137216,0.00186048,-0.00017709,0.00047035,-0.00048703,0.0058638
 1,-0.00209075,-0.00498448,-0.02484534,0.03596097,-0.05600131,0.0118925
 6,-0.02085837,0.00666028,0.00002834,0.00000125,-0.00004185,-0.00005716
 ,-0.00013487,0.00002507,0.00001181,0.00001272,-0.00000562,-0.00000773,
 0.00000061,0.00000270,0.00001340,-0.00000203,0.00000331,0.00000137,0.0
 0000219,0.00001736,0.00001389,0.00000948,-0.00000084,-0.00003481,-0.00
 000687,0.00002351,0.00004304,0.00002279,-0.00000404,-0.00001477,-0.000
 02887,0.00004456,-0.00211272,0.00201270,-0.00202852,-0.01475649,0.0234
 9035,-0.00330871,0.02504651,-0.03802713,0.05718870,-0.00084724,-0.0007
 6915,-0.00053617,0.00007779,-0.00021209,0.00004655,0.00255189,0.001746
 68,-0.00212263,-0.00062222,0.00024652,0.00130416,0.01079343,0.02634205
 ,-0.00162519,-0.01206267,-0.01531656,0.00181785,-0.15582439,-0.1332973
 3,0.01609390,0.00000679,0.00007240,0.00000796,0.00006599,0.00030003,-0
 .00000928,-0.00003115,-0.00004841,0.00002318,-0.00001049,-0.00001431,-
 0.00002818,-0.00002199,-0.00000717,0.00000319,0.00000613,-0.00001053,-
 0.00002541,-0.00007983,0.00002604,-0.00003971,-0.00000186,0.00001780,-
 0.00004140,-0.00008669,-0.00001548,0.00000733,-0.00000569,0.00001657,0
 .00004722,-0.00119466,0.00137637,0.00345320,0.00118534,0.00049742,0.00
 002922,0.00005520,0.00031808,-0.00034257,0.16486931,0.00067228,0.00035
 141,-0.00004726,-0.00008163,0.00014488,-0.00001221,-0.00543049,-0.0010
 3095,0.00774789,0.00027126,0.00281181,-0.00320570,-0.00039358,-0.03613
 994,0.00320127,0.00372218,0.00741487,-0.00053529,-0.12547622,-0.202895
 76,0.02146409,-0.00009623,0.00007925,-0.00009957,-0.00017710,-0.000297
 90,-0.00000941,0.00005938,0.00003077,0.00001866,0.00000696,0.00003115,
 0.00002129,0.00004251,0.00000845,0.00000633,-0.00000656,0.00001024,0.0
 0001720,0.00014716,0.00002437,0.00011922,0.00004399,-0.00004402,0.0000
 7069,0.00009850,0.00002787,-0.00000282,0.00002196,-0.00003908,-0.00000
 295,0.00130859,0.00092825,-0.00178289,-0.00017727,0.00008362,0.0004833
 9,-0.00074476,0.00030390,0.00060081,0.13126790,0.23068578,0.00006185,0
 .00013386,-0.00009948,-0.00003628,-0.00001160,-0.00002803,0.00039596,-
 0.00179127,0.00146555,-0.00049176,0.00072699,-0.00033220,0.00234604,0.
 00964794,-0.00125195,0.01689804,0.02034517,-0.00266732,0.01612554,0.02
 101114,-0.05564539,-0.00001962,0.00007852,-0.00000641,0.00005462,0.000
 01095,0.00000530,-0.00000808,-0.00002721,0.00004228,-0.00000387,0.0000
 0292,-0.00001405,-0.00001104,-0.00000666,-0.00001042,-0.00000891,0.000
 00670,-0.00000819,-0.00003873,0.00004596,-0.00005053,-0.00000469,0.000
 00182,-0.00000373,-0.00000655,-0.00000837,-0.00002127,0.00000504,0.000
 04020,0.00004416,0.00346712,-0.00080124,-0.00338026,-0.00096073,0.0005
 6861,0.00100990,-0.00038911,-0.00035800,0.00094989,-0.02038611,-0.0275
 3615,0.05622223,0.00020542,0.00052898,0.00070456,-0.00021950,-0.000041
 11,0.00006814,0.00335215,0.00118653,-0.00767835,0.00030180,-0.00237746
 ,0.00287167,-0.01831835,0.00890360,-0.01419315,0.01276829,0.00372289,0
 .02038613,-0.11017599,-0.02517664,-0.10486209,-0.00008917,0.00008957,0
 .00006036,0.00018163,0.00002166,-0.00001536,-0.00002516,0.00002170,-0.
 00002628,0.00001143,0.00000059,0.00001933,-0.00001445,-0.00000285,-0.0
 0000368,0.00001126,0.00000156,0.00001181,-0.00001746,0.00001226,-0.000
 08857,0.00003564,0.00002610,-0.00005391,-0.00002554,-0.00001058,-0.000
 01140,0.00003324,0.00002071,-0.00011639,0.00098881,-0.00024186,-0.0009
 4099,-0.00251225,0.00053346,0.00424300,0.00070923,-0.00008112,-0.00115
 658,-0.00883642,-0.00512955,-0.01704097,0.12161431,-0.00070487,-0.0010
 0330,-0.00068181,0.00050509,0.00002051,-0.00006335,-0.00202940,0.00098
 737,0.00450878,0.00110485,0.00052378,-0.00156818,0.02643972,-0.0053744
 5,0.02768118,-0.00273961,-0.00009523,-0.00321457,-0.02967720,-0.061155
 25,-0.04546852,0.00024684,-0.00020238,0.00003239,-0.00024942,0.0000094
 7,0.00000813,0.00002115,0.00002265,-0.00000604,-0.00000253,0.00000079,
 0.00000554,0.00002669,0.00000662,0.00001074,-0.00000548,-0.00000165,-0
 .00000955,-0.00002792,0.00006258,0.00000726,-0.00010360,0.00004459,-0.
 00000991,0.00001927,0.00000284,0.00003554,-0.00007898,-0.00007074,0.00
 014147,0.00077211,0.00037685,0.00036580,0.00120709,0.00103150,-0.00043
 235,-0.00001098,0.00009794,0.00002968,-0.01263272,-0.00237572,-0.02208
 640,0.01802077,0.06707515,-0.00047642,-0.00005737,-0.00009540,-0.00003
 021,-0.00021127,0.00006447,0.00270696,-0.00066864,-0.00135757,0.000214
 65,-0.00055221,0.00115041,-0.00643874,0.00755017,-0.00196526,-0.011014
 92,-0.00520947,-0.02008060,-0.10844741,-0.04124143,-0.24152633,-0.0000
 8652,0.00019451,-0.00004780,0.00003505,0.00007714,-0.00002637,-0.00001
 818,-0.00002038,0.00004145,0.00000457,0.00001222,-0.00001581,-0.000006
 46,-0.00000332,-0.00000047,0.00000583,-0.00000080,0.00000074,-0.000038
 34,0.00003866,-0.00001850,0.00003020,-0.00001522,-0.00000638,-0.000013
 74,0.00000850,0.00000024,0.00001854,-0.00000836,0.00004317,-0.00029333
 ,0.00079728,0.00097218,0.00360061,-0.00056277,-0.00224752,0.00018994,-
 0.00052750,0.00046945,0.00225143,-0.00037074,0.00374741,0.11773292,0.0
 4079173,0.26089137,-0.00156826,-0.00024607,-0.00061832,-0.01871915,-0.
 01613931,0.02967620,-0.00233773,0.00202081,0.00119034,0.00046501,-0.00
 101335,0.00018749,0.00108436,-0.00011858,-0.00037386,-0.00004597,-0.00
 003611,0.00002321,-0.00000351,-0.00005415,-0.00006671,-0.08768522,-0.0
 0862756,0.03240694,0.00018371,-0.00068302,-0.00195542,0.00010203,0.000
 19110,-0.00003862,-0.00004504,0.00017578,-0.00012806,-0.00023765,-0.00
 005371,0.00001178,0.00001943,0.00010254,0.00010583,0.00663468,0.005342
 59,-0.01440906,0.00187316,0.00203568,-0.00003910,-0.00036771,-0.000242
 63,0.00018664,0.00120832,-0.00003951,-0.00040049,0.00010143,0.00000044
 ,0.00000425,-0.00001685,-0.00001640,0.00000646,0.00002502,0.00003430,-
 0.00002534,0.00002565,0.00004897,0.00000221,0.00004414,-0.00008266,0.0
 0003626,0.54949971,-0.00015794,0.00079984,0.00006158,-0.00978481,-0.00
 649307,0.00789695,-0.00024488,0.00035807,0.00094905,0.00010342,0.00001
 752,-0.00026513,0.00007691,0.00003348,-0.00037055,-0.00001329,0.000009
 22,0.00001595,0.00004973,-0.00003682,0.00008835,-0.00779491,-0.0893911
 2,0.03386729,-0.00020250,-0.00018693,-0.00087513,0.00013533,0.00005752
 ,0.00004693,-0.00002963,0.00007081,0.00000667,0.00000037,0.00000219,-0
 .00000209,-0.00002653,-0.00001074,0.00000133,-0.01101101,-0.00971754,0
 .02488547,0.00865714,0.00784294,-0.02151073,-0.00002607,-0.00008832,-0
 .00003925,0.00108546,0.00061169,-0.00077688,0.00006595,-0.00000499,0.0
 0005983,-0.00002808,-0.00006670,-0.00003181,0.00000077,0.00003067,-0.0
 0003349,-0.00001083,0.00001379,-0.00002263,-0.00003371,0.00005318,-0.0
 0005801,-0.01155735,0.55409081,-0.00275622,-0.00307420,-0.00086406,0.0
 1011859,0.00313644,0.00266154,-0.00176781,0.00194813,0.00054836,0.0004
 6169,-0.00075915,0.00005083,0.00088340,-0.00060008,-0.00062015,-0.0000
 8163,-0.00007292,0.00005999,-0.00013358,0.00015201,0.00004530,0.023553
 62,0.02951956,-0.14475950,0.00088651,-0.00031822,-0.00031592,-0.000328
 22,-0.00001029,-0.00006808,0.00008102,0.00001923,-0.00001289,-0.000197
 16,-0.00000823,-0.00004423,-0.00000415,0.00010037,0.00004410,0.0039721
 3,0.00452812,-0.01040819,0.00965241,0.00596158,-0.03194751,-0.00039439
 ,-0.00011262,0.00009503,-0.00107961,-0.00031006,0.00069164,0.00014631,
 0.00000066,0.00004602,-0.00002479,-0.00006829,-0.00003882,0.00004273,0
 .00005039,-0.00007400,0.00004550,-0.00000873,-0.00001191,0.00001751,-0
 .00002846,-0.00001868,0.03582081,0.04129297,0.48609872,0.00026171,0.00
 073693,-0.00007094,-0.00008207,0.00006344,-0.00007293,-0.00218555,-0.0
 0256797,0.00403243,-0.00159625,0.00190623,-0.00201039,0.00096331,-0.00
 002435,-0.00121328,0.00000548,-0.00001734,0.00002369,-0.00028444,0.000
 39223,-0.00000384,-0.00000869,-0.00000495,-0.00000756,0.01244690,-0.00
 796331,0.01392434,-0.11413772,0.05471385,-0.10038194,-0.00892497,0.014
 61071,-0.02402766,-0.00496486,-0.00212617,-0.00045236,-0.00071473,-0.0
 0045711,0.00054629,-0.00004645,0.00000170,-0.00001020,0.00002006,-0.00
 001076,-0.00001060,-0.00167715,-0.00307543,0.00225751,0.00003357,0.000
 14510,0.00006230,0.00000459,0.00001110,-0.00001188,-0.00000108,0.00000
 608,-0.00001995,0.00002562,-0.00002014,-0.00001223,-0.00000746,-0.0000
 1717,0.00004048,-0.00000251,-0.00003711,0.00001482,0.00001427,-0.00000
 163,0.00002859,0.11997061,0.00196353,-0.00162160,-0.00157215,-0.000692
 13,-0.00048245,-0.00013846,-0.00048231,0.00059967,0.00060962,0.0017566
 6,-0.00090629,-0.00023783,0.00025888,-0.00023307,-0.00031185,0.0000003
 7,-0.00001970,0.00000921,-0.00005606,0.00010349,-0.00004063,-0.0000128
 7,0.00004911,0.00030663,0.00826171,-0.00432910,0.01373151,0.05308889,-
 0.10564780,0.10978856,-0.00255257,0.00564606,-0.00387525,-0.00197956,0
 .00516618,0.00247674,-0.00062156,-0.00049680,-0.00038784,-0.00000242,0
 .00000179,-0.00000296,0.00003952,-0.00001157,0.00002790,-0.00313062,0.
 00250798,0.00410383,-0.00000483,0.00001479,-0.00013777,-0.00000802,-0.
 00000238,0.00000352,0.00000408,0.00000333,-0.00000955,0.00001080,-0.00
 000236,-0.00000453,0.00004053,-0.00004289,-0.00000535,-0.00001217,-0.0
 0000672,0.00000323,-0.00005553,-0.00003612,0.00000360,-0.05705730,0.10
 274276,-0.00002288,-0.00189825,-0.00077771,-0.00007067,0.00000227,0.00
 000305,0.00123760,0.00112272,-0.00178254,-0.00245317,-0.00079925,0.000
 44440,-0.00016858,0.00007996,0.00060299,0.00000109,-0.00000945,-0.0000
 0076,0.00014206,-0.00009860,0.00000330,-0.00002397,0.00000350,0.000119
 31,-0.00980860,0.00851744,-0.01084364,-0.09757938,0.10985908,-0.220106
 07,0.00020651,0.00129265,0.00174416,-0.00075341,0.00269913,0.00355897,
 0.00045554,-0.00044736,0.00004192,0.00003727,-0.00000258,0.00001044,0.
 00001250,0.00000313,0.00001923,0.00233811,0.00441742,0.00104847,-0.000
 03660,-0.00010467,-0.00007791,-0.00001228,-0.00000858,0.00001074,0.000
 00270,0.00000148,0.00000207,-0.00000788,0.00000876,0.00000267,0.000007
 57,-0.00002819,-0.00000760,-0.00000450,-0.00000346,-0.00001776,-0.0000
 2489,-0.00001020,-0.00001775,0.10673970,-0.12223256,0.22773359,-0.0001
 4496,-0.00090715,0.00103782,-0.00047080,0.00009294,-0.00000913,0.00021
 208,-0.00048242,0.00019171,-0.00002077,0.00026595,-0.00020053,-0.00011
 759,0.00017238,-0.00001400,-0.00000693,0.00001538,-0.00000659,0.000042
 19,-0.00009057,0.00001909,0.00009769,-0.00014497,-0.00012075,-0.004905
 29,-0.00066860,-0.00242358,-0.01210418,-0.01831169,0.02124117,-0.13511
 505,-0.08491989,0.08897859,0.01175386,0.00917542,-0.01007328,-0.000399
 38,0.00081622,-0.00314974,-0.00001566,0.00000935,-0.00000475,-0.000110
 08,0.00000587,0.00003446,-0.00074990,0.00052867,-0.00075419,0.00000214
 ,0.00000580,0.00006392,0.00000773,-0.00000066,-0.00000065,0.00000136,-
 0.00000577,0.00000208,-0.00000972,0.00000616,0.00000397,-0.00000633,0.
 00002010,0.00000132,-0.00001006,0.00000837,-0.00000206,-0.00002282,0.0
 0000545,-0.00004209,0.00083785,0.00092123,0.00019031,0.14017975,0.0000
 6222,0.00003464,0.00014555,-0.00000400,0.00002634,-0.00008257,0.000104
 30,-0.00010565,0.00004340,-0.00001275,0.00004493,-0.00002915,-0.000054
 17,0.00004373,0.00000594,-0.00000257,0.00000250,-0.00000241,0.00004179
 ,-0.00001882,0.00000988,0.00005385,-0.00002391,0.00003319,-0.00112515,
 0.00552444,0.00230665,-0.00075645,0.00141552,0.00194007,-0.08501368,-0
 .13279600,0.10933698,-0.00895064,-0.00479380,0.00816185,0.00154387,0.0
 0381194,0.00469480,-0.00000344,0.00000341,0.00000146,-0.00003026,0.000
 00301,0.00001655,0.00047886,-0.00026852,-0.00035158,0.00004223,-0.0000
 1286,-0.00000826,-0.00000056,-0.00000365,0.00000152,0.00000206,-0.0000
 0165,-0.00000178,-0.00000325,0.00000422,0.00000085,-0.00000177,0.00000
 064,0.00000111,-0.00000678,0.00000127,-0.00000306,-0.00002794,-0.00000
 514,-0.00001917,0.00045302,-0.00233631,-0.00239720,0.09273401,0.132552
 04,-0.00016192,-0.00000535,0.00022869,0.00000021,-0.00004015,-0.000057
 64,-0.00005541,0.00008593,0.00011058,0.00010164,-0.00003064,-0.0000225
 9,0.00009745,-0.00009428,-0.00006674,0.00000326,-0.00000647,0.00000229
 ,-0.00002706,0.00006100,-0.00000558,-0.00000286,-0.00001120,-0.0000229
 8,-0.00211714,0.00253064,0.00332050,-0.00350873,-0.00297662,0.00610266
 ,0.08895378,0.10946044,-0.16187406,0.01483857,0.01291547,-0.01060659,-
 0.00376915,0.00456463,-0.00054742,0.00000948,-0.00000022,0.00000636,0.
 00000542,-0.00000924,-0.00000453,-0.00072531,-0.00042623,-0.00018901,0
 .00002538,-0.00002499,-0.00001168,-0.00000420,-0.00000013,-0.00000095,
 -0.00000044,0.00000468,-0.00000366,0.00000642,-0.00000380,-0.00000116,
 0.00000244,-0.00001021,0.00000444,-0.00000032,-0.00000616,0.00000258,0
 .00001394,0.00000250,0.00001402,0.00078590,-0.00224193,-0.00086015,-0.
 09544981,-0.12170729,0.16611509,0.00000071,0.00017125,0.00008008,0.000
 01553,-0.00001826,0.00002153,0.00021025,-0.00012895,-0.00019678,-0.000
 17580,0.00005142,0.00003520,-0.00017198,0.00013213,0.00012100,-0.00000
 598,0.00000763,-0.00000631,0.00007497,-0.00008410,0.00000915,0.0000364
 6,-0.00000015,-0.00001356,0.00057656,0.00014248,0.00018409,0.00110179,
 0.00091787,-0.00299411,-0.00997100,-0.00288762,0.00022110,-0.32521097,
 -0.03256009,-0.03905694,-0.01228750,-0.00014064,-0.00424011,-0.0000142
 2,0.00000057,-0.00000294,-0.00003395,0.00000780,0.00001323,0.00066006,
 -0.00281856,0.00212309,0.00000566,0.00003787,0.00001726,0.00000266,-0.
 00000380,0.00000296,0.00000286,-0.00000537,0.00000366,-0.00000953,0.00
 000774,0.00000211,-0.00000490,0.00000974,-0.00000519,-0.00000561,0.000
 00882,-0.00000519,-0.00001884,-0.00000210,-0.00002009,-0.00053206,-0.0
 0022364,0.00011703,0.00068183,0.00089081,0.00009572,0.34510415,0.00001
 649,-0.00065940,-0.00055993,-0.00013179,0.00011158,-0.00018897,-0.0000
 6329,-0.00001384,0.00019298,0.00010034,-0.00001678,-0.00004261,0.00003
 448,-0.00002764,-0.00008344,0.00000121,0.00000080,0.00000431,-0.000016
 25,0.00000464,-0.00000342,0.00000387,-0.00000361,0.00006916,0.00025845
 ,-0.00086265,0.00023702,0.00018583,0.00304329,0.00544596,0.01541765,0.
 00508296,0.00132576,-0.03263283,-0.04743820,0.00739770,-0.01811697,0.0
 0173640,-0.00397529,-0.00000043,-0.00000088,-0.00000410,0.00000008,0.0
 0000669,0.00000292,-0.00225199,0.00260478,0.00560671,0.00000199,0.0000
 0649,0.00001780,-0.00000045,-0.00000111,-0.00000090,0.00000073,-0.0000
 0004,-0.00000370,0.00000162,0.00000043,-0.00000081,0.00000514,-0.00000
 427,0.00000305,-0.00000392,-0.00000046,-0.00000013,-0.00001387,-0.0000
 0407,-0.00000658,0.00066445,0.00022163,0.00011421,0.00025723,-0.002129
 57,-0.00226859,0.03615366,0.04038436,0.00005006,-0.00062864,-0.0002481
 5,-0.00011012,0.00011589,-0.00009293,0.00008627,0.00019480,-0.00018056
 ,-0.00016158,-0.00013873,0.00013682,-0.00003665,-0.00001166,0.00006047
 ,0.00000128,-0.00000031,0.00000125,0.00001406,-0.00001703,-0.00000069,
 0.00000334,-0.00004048,0.00003733,0.00033581,0.00039401,-0.00109274,-0
 .00232345,0.00543871,-0.00114974,-0.02440372,-0.00407163,0.00138541,-0
 .03918127,0.00746873,-0.05707164,0.02061256,0.00151737,0.00680971,0.00
 001445,0.00000145,-0.00000091,-0.00000807,0.00000531,0.00000032,0.0013
 3234,0.00531519,0.00000483,-0.00000306,-0.00005364,0.00001094,-0.00000
 183,-0.00000145,0.00000067,0.00000027,0.00000043,-0.00000083,-0.000000
 74,0.00000134,0.00000037,0.00000289,-0.00000352,-0.00000059,-0.0000004
 5,-0.00000017,-0.00000212,-0.00001180,0.00000024,-0.00001419,-0.001093
 71,-0.00014677,0.00001916,0.00090307,-0.00211490,-0.00067828,0.0429669
 0,-0.01115134,0.05252336,-0.00024536,0.00093635,-0.00109426,-0.0000734
 7,0.00010088,0.00007503,-0.00006986,-0.00057763,-0.00001434,0.00002401
 ,0.00017956,-0.00008471,-0.00020747,0.00023269,0.00009795,-0.00001057,
 0.00001739,-0.00001670,0.00007178,-0.00007403,0.00002773,0.00005031,-0
 .00005725,0.00005596,-0.00497893,-0.00229533,-0.00054338,-0.00090744,-
 0.00045678,0.00066051,-0.00097244,-0.00304307,0.00183415,0.01195473,-0
 .00806245,0.01407325,-0.11316467,0.05162637,-0.09602201,0.00000179,-0.
 00000014,0.00000084,-0.00005799,0.00001758,0.00002116,-0.00908621,0.01
 517166,-0.02530205,0.00003952,-0.00003759,-0.00004175,0.00000065,-0.00
 000449,0.00000098,0.00000344,0.00000016,0.00000604,-0.00000953,0.00000
 510,0.00000786,-0.00001130,0.00001569,-0.00000411,-0.00000718,0.000008
 50,-0.00000180,-0.00005714,0.00000110,-0.00005692,0.00003175,0.0002237
 7,0.00004851,0.00039433,-0.00050580,0.00069503,0.00068675,0.00098374,-
 0.00000640,0.11583642,-0.00027510,0.00020798,0.00004160,0.00006355,-0.
 00004200,-0.00005999,-0.00015626,0.00004490,0.00004753,0.00003930,0.00
 000252,-0.00003409,0.00006008,-0.00006108,-0.00003851,0.00000704,-0.00
 000140,0.00000832,-0.00002442,0.00004192,0.00000505,-0.00001416,0.0000
 0857,0.00000104,-0.00166275,0.00502828,0.00249835,-0.00024868,-0.00045
 031,-0.00046648,-0.00383976,0.00296627,0.00446782,0.00948862,-0.004557
 37,0.01348832,0.05207606,-0.09943824,0.10654654,0.00001037,0.00000074,
 0.00000412,0.00001185,0.00000540,-0.00000412,-0.00263180,0.00465299,-0
 .00342486,-0.00006562,-0.00002188,-0.00004039,-0.00000240,0.00000012,-
 0.00000107,-0.00000131,0.00000062,-0.00000469,0.00000264,-0.00000213,-
 0.00000172,0.00000086,-0.00000413,0.00000466,0.00000276,-0.00000537,-0
 .00000077,0.00000801,0.00001250,0.00000913,0.00019145,-0.00071755,-0.0
 0055212,0.00044437,-0.00022693,0.00074302,0.00036766,-0.00217155,-0.00
 229675,-0.05476702,0.09711150,-0.00003298,0.00018273,-0.00000032,-0.00
 001783,0.00001759,-0.00009343,0.00006440,-0.00015333,-0.00008320,-0.00
 007474,0.00005309,-0.00000773,-0.00011677,0.00007801,0.00005495,-0.000
 00234,0.00000605,-0.00000279,0.00005041,-0.00003958,0.00000834,0.00003
 557,-0.00001655,0.00004156,-0.00077253,0.00225143,0.00383165,0.0007192
 1,-0.00039334,0.00003826,0.00251899,0.00472279,0.00094277,-0.01099366,
 0.00749629,-0.01098019,-0.09589450,0.10707830,-0.21608500,-0.00000582,
 0.00000197,0.00000038,-0.00003327,0.00002248,0.00001387,-0.00046299,0.
 00194166,-0.00014041,-0.00004201,0.00000946,-0.00004277,-0.00000040,-0
 .00000416,0.00000167,0.00000245,-0.00000236,0.00000073,-0.00000565,0.0
 0000505,0.00000192,-0.00000422,0.00000501,-0.00000142,-0.00000437,0.00
 000450,-0.00000377,-0.00004034,0.00000979,-0.00003360,0.00006439,-0.00
 050917,-0.00041130,-0.00059357,0.00050911,-0.00058769,0.00079506,-0.00
 206885,-0.00065272,0.10474637,-0.11880928,0.22484491,-0.00015520,0.000
 23227,0.00015499,0.00038207,-0.00210869,0.00297894,-0.00061989,0.00075
 096,0.00000139,0.00017098,-0.00036644,0.00013195,0.00042932,-0.0003452
 4,-0.00012464,-0.00001758,-0.00006755,0.00001989,-0.00017431,0.0002014
 1,-0.00000572,-0.01099335,-0.00230914,-0.00182196,0.00004341,-0.000117
 57,-0.00018988,-0.00006490,0.00005741,-0.00005813,-0.00000191,0.000012
 15,-0.00001557,-0.00006457,-0.00000058,-0.00002522,-0.00004175,0.00000
 184,0.00005907,0.00062222,-0.00034403,0.00019831,0.00018546,0.00019089
 ,-0.00111109,-0.00003637,-0.00007917,0.00001754,0.00031297,0.00011453,
 -0.00021678,0.00001671,0.00001738,-0.00001579,0.00000149,0.00002031,0.
 00000007,0.00002298,-0.00000720,-0.00001293,0.00002845,-0.00002056,0.0
 0000466,0.00002316,-0.00003453,0.00002508,-0.28517611,-0.06324455,-0.0
 2793978,0.00001287,-0.00000536,-0.00000474,-0.00002373,-0.00001422,0.0
 0001115,-0.00002062,-0.00000633,-0.00000315,-0.00002144,0.00001222,-0.
 00001437,0.30981771,-0.00032110,0.00021968,-0.00000476,0.00024063,-0.0
 0067337,0.00246123,-0.00052627,0.00058133,0.00024610,0.00015521,-0.000
 29715,0.00005488,0.00034813,-0.00021306,-0.00006077,-0.00006526,-0.000
 09829,0.00001576,-0.00018150,0.00012981,0.00000233,-0.01202152,-0.0040
 1170,-0.00095986,0.00010336,-0.00012749,-0.00027413,-0.00003395,0.0000
 4083,-0.00003654,-0.00000073,0.00001742,-0.00002094,-0.00005367,-0.000
 01085,-0.00000765,-0.00001104,0.00003517,0.00002613,0.00002824,-0.0000
 5400,-0.00050975,0.00074523,0.00021362,-0.00074935,-0.00009539,-0.0000
 7234,0.00004841,-0.00037539,0.00006167,-0.00005038,0.00003742,0.000008
 30,-0.00002648,0.00001510,0.00002885,0.00000709,0.00002375,0.00001076,
 -0.00001161,0.00004128,-0.00001898,0.00000163,0.00001088,-0.00004155,0
 .00003364,-0.06384658,-0.06501166,-0.00855418,0.00000847,-0.00000313,-
 0.00000518,-0.00001364,-0.00000703,0.00000538,-0.00000838,-0.00000304,
 -0.00000389,-0.00001945,0.00000369,-0.00001113,0.07135563,0.06623196,0
 .00103086,0.00063505,0.00046755,0.00022086,0.00192947,-0.00505750,0.00
 074743,-0.00082857,-0.00038230,-0.00016730,0.00036679,-0.00008056,-0.0
 0034816,0.00014342,0.00021104,-0.00000895,0.00000169,-0.00002933,0.000
 02191,-0.00002219,0.00002224,0.02968552,0.00674766,0.00156244,-0.00021
 404,0.00023904,0.00048588,0.00004260,-0.00003579,0.00003669,0.00000416
 ,-0.00005455,0.00003174,0.00008705,0.00002018,-0.00000075,-0.00000564,
 -0.00007023,-0.00001779,-0.00069913,-0.00027665,0.00126741,0.00085852,
 0.00029817,0.00185186,0.00021436,0.00014249,-0.00010192,0.00011064,-0.
 00018322,0.00000891,-0.00001589,-0.00000315,0.00001629,0.00000028,0.00
 001062,0.00000641,-0.00000466,-0.00000064,0.00001511,-0.00000522,-0.00
 000884,-0.00000707,-0.00000679,0.00001861,-0.00000978,-0.02926883,-0.0
 0859029,-0.05037637,-0.00001317,0.00001062,0.00001428,0.00001332,0.000
 00867,-0.00000454,0.00000450,0.00000494,0.00000914,0.00002884,-0.00000
 258,0.00001445,0.02982501,0.00702262,0.05474203,0.00005083,-0.00018249
 ,-0.00019011,0.00058344,0.00122074,0.00051907,0.00028839,-0.00035775,0
 .00008613,-0.00009309,0.00015472,-0.00003528,-0.00041295,0.00013267,0.
 00007123,0.00010291,0.00009915,0.00000542,0.00017076,-0.00011721,-0.00
 005132,-0.00097626,0.00905291,0.00815305,-0.00004415,0.00001227,-0.000
 03084,0.00004514,-0.00001498,0.00001063,-0.00001140,0.00002251,-0.0000
 0336,0.00002412,-0.00000921,0.00001327,0.00001010,0.00002837,-0.000037
 23,0.00029957,-0.00010830,-0.00061397,-0.00086692,-0.00134988,0.001877
 54,-0.00005189,-0.00007649,0.00004946,-0.00002786,0.00006450,0.0001015
 5,-0.00008901,-0.00000112,-0.00002315,0.00000636,-0.00000810,-0.000005
 23,-0.00003245,-0.00003373,0.00001994,-0.00003921,0.00002011,0.0000110
 6,-0.00001770,0.00003543,-0.00001477,-0.05011216,-0.01214023,-0.012927
 38,0.00000129,0.00000275,-0.00000376,0.00001023,0.00000519,-0.00000558
 ,0.00001080,0.00000304,-0.00000284,0.00000106,-0.00000428,0.00000573,-
 0.00037893,-0.02225223,-0.02293252,0.04989036,0.00022899,0.00021860,0.
 00000874,0.00016393,0.00051193,0.00025031,-0.00017545,-0.00005087,0.00
 022296,0.00005401,0.00007671,-0.00013575,0.00002791,0.00008030,0.00000
 613,-0.00002894,-0.00000812,-0.00000341,0.00011126,-0.00013491,0.00000
 221,0.00097630,0.00935305,0.00973030,-0.00011091,-0.00001293,0.0000156
 5,0.00004154,-0.00000050,0.00001087,-0.00001067,-0.00000327,0.00001315
 ,0.00001933,-0.00000392,0.00000052,-0.00000711,-0.00001517,0.00002261,
 0.00034137,0.00080960,-0.00069589,-0.00100584,-0.00041432,0.00190429,0
 .00007955,0.00008056,-0.00005471,-0.00002483,-0.00005895,-0.00008131,0
 .00003022,-0.00001149,-0.00000820,0.00001250,-0.00001595,0.00000018,-0
 .00000319,0.00001465,-0.00000264,-0.00000953,0.00002701,-0.00000711,-0
 .00001131,0.00000675,0.00000039,-0.01122396,-0.17614280,-0.13210278,-0
 .00001412,-0.00000761,0.00000802,0.00000383,0.00000003,-0.00000040,0.0
 0000064,-0.00000237,0.00000292,0.00001535,-0.00000342,0.00000202,-0.00
 013818,-0.00550018,-0.00401559,0.01380817,0.18802456,0.00042775,0.0005
 6214,0.00030270,-0.00163298,-0.00106574,0.00072335,0.00070702,-0.00025
 051,-0.00073884,-0.00015991,-0.00005949,0.00043458,-0.00046077,0.00000
 192,0.00053356,0.00011868,0.00006030,-0.00000507,-0.00015449,0.0001645
 4,-0.00008033,-0.00161304,-0.01976185,-0.01945853,0.00004102,0.0000922
 9,-0.00020350,0.00001864,0.00001144,0.00002455,0.00001145,0.00001030,-
 0.00000265,-0.00000829,0.00000780,-0.00001373,-0.00001566,-0.00000417,
 0.00001114,-0.00069832,-0.00002178,0.00083697,0.00281600,0.00376130,-0
 .00458462,0.00002151,0.00001216,-0.00000779,0.00009733,0.00003860,-0.0
 0012039,-0.00012760,0.00001779,-0.00001369,-0.00000487,0.00002510,0.00
 001625,-0.00001613,-0.00006162,0.00002821,0.00000174,-0.00004703,0.000
 02603,0.00002597,-0.00001468,0.00002135,-0.01215271,-0.13029208,-0.181
 84185,0.00001281,-0.00001261,-0.00001015,-0.00000010,-0.00000575,-0.00
 000008,-0.00000431,-0.00000158,-0.00000056,-0.00000407,-0.00000021,-0.
 00000324,-0.00073508,-0.00148974,-0.00232435,0.01176700,0.14248988,0.1
 9897741,-0.00006208,0.00014865,0.00002515,0.00123918,-0.00117708,-0.00
 003012,0.00012609,-0.00018344,0.00013054,-0.00002387,0.00013868,-0.000
 12379,-0.00005386,0.00003506,-0.00003788,-0.00004670,-0.00003692,0.000
 00142,-0.00002468,-0.00000494,0.00003069,0.00603997,-0.01052678,0.0032
 4212,-0.00004975,0.00001401,-0.00000531,0.00002638,-0.00001375,0.00001
 893,0.00000186,-0.00000292,0.00000564,0.00002881,0.00000273,0.00000317
 ,-0.00000786,0.00001063,-0.00001838,-0.00008878,-0.00129896,0.00245023
 ,0.00016324,-0.00023341,-0.00053619,0.00000712,0.00000873,0.00000290,-
 0.00001906,0.00018820,0.00015307,0.00002615,-0.00000362,-0.00000762,0.
 00001116,0.00000629,0.00000150,0.00000295,0.00001652,-0.00000440,0.000
 01210,-0.00000166,-0.00000590,-0.00000687,0.00000459,0.00000424,-0.115
 18256,0.10585832,-0.03798197,-0.00000661,0.00000078,0.00000152,0.00000
 834,0.00000507,-0.00000383,0.00000870,0.00000188,-0.00000010,0.0000087
 0,-0.00000341,0.00000804,-0.01524877,0.02632344,-0.00848112,0.00066017
 ,-0.00293319,0.00166097,0.12236987,-0.00051009,0.00018786,-0.00015779,
 0.00142674,0.00013744,-0.00032373,0.00071515,-0.00012304,-0.00026351,-
 0.00017323,0.00003260,0.00013491,-0.00045598,-0.00004059,0.00022134,0.
 00006286,0.00004295,-0.00000294,-0.00006693,0.00013437,-0.00000243,0.0
 0539480,-0.01100013,0.00396098,0.00014753,-0.00000045,-0.00006969,-0.0
 0003852,-0.00001820,-0.00000447,0.00001202,0.00001817,-0.00000903,-0.0
 0001367,0.00000021,0.00000210,0.00000577,0.00005138,-0.00003331,-0.001
 52131,0.00040516,0.00209229,-0.00028771,0.00075424,-0.00101321,-0.0001
 3795,-0.00007467,0.00010812,-0.00089320,0.00001392,0.00018198,-0.00007
 365,0.00000816,0.00000268,-0.00000490,0.00001115,-0.00000296,-0.000006
 86,-0.00003639,0.00001597,-0.00000917,-0.00003479,0.00000601,0.0000029
 2,0.00002257,-0.00000960,0.10558978,-0.21507491,0.05957348,0.00002459,
 0.00000671,-0.00001645,-0.00000005,0.00000150,-0.00000301,0.00000415,-
 0.00000064,-0.00000818,-0.00002041,-0.00000622,-0.00000735,-0.00421682
 ,0.00825325,-0.00328753,0.01167831,-0.01757751,0.00704533,-0.11635211,
 0.23302853,0.00040916,-0.00020288,0.00004188,-0.00169875,-0.00033705,0
 .00079138,-0.00026360,-0.00010336,-0.00016187,0.00002627,-0.00005857,0
 .00012985,0.00010903,0.00012248,0.00013721,0.00005304,0.00002553,-0.00
 000227,0.00004970,-0.00006987,-0.00005784,-0.01540517,0.02434780,-0.00
 993031,-0.00003964,0.00003391,0.00000986,0.00001857,0.00001904,-0.0000
 0691,-0.00000344,-0.00000115,-0.00001382,0.00000051,-0.00000127,0.0000
 0376,0.00000710,-0.00000743,-0.00000111,0.00265466,0.00169177,-0.00480
 664,-0.00093642,0.00123485,0.00169810,0.00002373,-0.00003317,0.0000208
 5,0.00077563,-0.00011901,0.00008632,-0.00004593,0.00000085,-0.00002545
 ,0.00000346,0.00001717,0.00001449,-0.00001399,-0.00001966,0.00001557,-
 0.00001097,0.00001616,0.00001515,0.00001048,-0.00002985,0.00002145,-0.
 03787983,0.05896964,-0.06940794,-0.00000499,0.00000144,0.00000351,0.00
 000143,0.00000047,-0.00000089,0.00000135,0.00000302,0.00000187,-0.0000
 0148,0.00000202,0.00000239,-0.00199906,0.00277383,-0.00212798,0.013478
 95,-0.01849848,0.00824070,0.03998612,-0.06849432,0.07525849,0.00027035
 ,0.00026565,-0.00050999,0.00061808,-0.00172555,-0.00062913,-0.00045366
 ,0.00053259,0.00007953,0.00014561,-0.00028550,0.00009389,0.00030938,-0
 .00029257,-0.00012238,0.00000415,-0.00003072,0.00001497,-0.00014026,0.
 00016110,-0.00001763,-0.00247501,0.00005400,0.00077389,0.00002653,-0.0
 0003772,0.00014293,-0.00006414,0.00006511,-0.00005968,-0.00001136,-0.0
 0000924,-0.00001710,-0.00003828,-0.00001394,0.00000260,0.00001148,0.00
 000154,0.00002235,0.00050220,-0.00060586,-0.00020493,-0.28797761,-0.06
 102932,-0.02687215,-0.00003935,-0.00007445,0.00001228,0.00034039,0.000
 09165,0.00028411,0.00000029,0.00001348,-0.00001024,-0.00000052,0.00000
 929,-0.00000003,0.00001390,-0.00001327,-0.00001015,0.00001780,-0.00001
 699,0.00000871,0.00001765,-0.00002682,0.00001960,0.00030571,0.00048285
 ,0.00048185,0.00001148,0.00001140,0.00000010,-0.00002042,-0.00001071,0
 .00000572,-0.00001637,-0.00000051,-0.00000070,-0.00001614,0.00000862,-
 0.00001083,0.00051545,0.00013521,-0.00036571,0.00037867,0.00006595,-0.
 00006025,-0.00004573,-0.00005909,-0.00000208,0.31240477,-0.00088951,0.
 00020101,-0.00030029,0.00131705,-0.00325245,-0.00341299,-0.00057895,0.
 00074269,-0.00032568,0.00016086,-0.00028639,0.00011765,0.00048837,-0.0
 0032822,-0.00009136,0.00000181,-0.00005153,0.00002755,-0.00012762,0.00
 015059,-0.00005498,-0.02293847,-0.00644775,-0.00328545,0.00004154,-0.0
 0009110,0.00071746,-0.00025083,0.00005476,-0.00010465,0.00001063,-0.00
 007342,0.00000708,-0.00005767,0.00000926,-0.00001817,-0.00003310,0.000
 00513,0.00002573,0.00000482,0.00029218,0.00087384,-0.06085371,-0.06267
 486,-0.00582921,-0.00002229,-0.00006150,0.00003850,-0.00032822,0.00016
 109,-0.00008637,0.00001206,0.00001351,-0.00002329,0.00000247,0.0000136
 3,0.00000588,0.00001620,-0.00000780,-0.00001584,0.00002488,-0.00000994
 ,0.00001284,0.00002655,-0.00004785,0.00003583,-0.00009635,0.00062772,0
 .00138012,0.00001186,0.00001595,0.00000245,-0.00003548,-0.00001217,0.0
 0000416,-0.00001448,-0.00000146,-0.00000341,-0.00002097,0.00000429,-0.
 00001538,0.00041026,0.00047579,-0.00028142,0.00016304,-0.00013469,0.00
 026400,0.00016978,0.00003754,-0.00006847,0.06788562,0.06619933,-0.0010
 3098,-0.00014073,0.00007136,0.00082901,-0.00380324,-0.00322096,-0.0003
 7210,0.00048764,-0.00026872,0.00012286,-0.00023735,0.00014746,0.000275
 11,-0.00020176,-0.00006199,-0.00000692,-0.00003521,0.00001478,-0.00005
 378,0.00008992,0.00000172,-0.02414914,-0.00509774,-0.00419980,0.000012
 91,-0.00014597,0.00059499,-0.00022256,0.00004466,-0.00010071,-0.000006
 02,-0.00005919,0.00002568,-0.00003727,0.00000355,-0.00001096,-0.000015
 03,-0.00000117,0.00000636,0.00049865,0.00048643,0.00091006,-0.02529235
 ,-0.00574688,-0.05083115,-0.00000508,-0.00004674,0.00001450,0.00017614
 ,0.00016670,-0.00003365,0.00001339,0.00000762,-0.00000167,-0.00000293,
 0.00000204,-0.00000313,0.00001193,0.00000076,-0.00001046,0.00001293,-0
 .00000938,-0.00000121,0.00001356,-0.00001905,0.00000775,-0.00144200,0.
 00032964,0.00125473,0.00001140,0.00000148,-0.00000104,-0.00002942,-0.0
 0001019,0.00000123,-0.00001049,-0.00000003,-0.00000091,-0.00001613,0.0
 0000316,-0.00001067,0.00076160,0.00004230,-0.00048642,0.00029922,0.000
 08542,0.00039747,0.00002438,0.00000313,-0.00010794,0.02882747,0.009965
 95,0.05305367,0.00014485,0.00008358,0.00014914,0.00030458,0.00047931,-
 0.00085948,0.00030769,-0.00037011,0.00007747,-0.00012380,0.00017783,-0
 .00014045,-0.00015723,0.00010829,0.00000567,-0.00001261,0.00000644,-0.
 00000997,0.00006358,-0.00004184,0.00005296,-0.00023719,0.00180950,-0.0
 0402608,-0.00005906,0.00002459,-0.00000906,0.00002282,-0.00000216,0.00
 003151,-0.00000068,-0.00000396,0.00000865,0.00001805,0.00000780,-0.000
 00039,-0.00001196,-0.00000322,-0.00000912,-0.00011042,0.00016202,0.000
 42442,-0.07833440,-0.03216965,0.07683213,0.00003389,0.00001078,-0.0000
 2337,0.00001009,0.00009818,-0.00001730,0.00000114,-0.00000213,0.000008
 22,0.00000066,-0.00000483,-0.00000781,-0.00000398,0.00000647,0.0000051
 8,-0.00000929,0.00000231,-0.00001049,-0.00002047,0.00002412,-0.0000165
 3,0.00008924,-0.00037596,-0.00039368,-0.00000031,-0.00001653,-0.000004
 29,0.00000874,0.00000253,-0.00000408,0.00000615,0.00000088,0.00000066,
 0.00000594,-0.00000370,0.00000492,0.00047159,0.00008640,-0.00033595,0.
 00064452,-0.00003849,-0.00004965,-0.00000437,-0.00019289,0.00026419,-0
 .00931067,-0.01141768,0.02800389,0.08019915,0.00002625,-0.00001126,0.0
 0018140,0.00083204,0.00103432,-0.00009522,0.00011142,-0.00011749,-0.00
 021479,0.00002338,0.00002561,0.00014413,-0.00011735,0.00010978,0.00009
 072,0.00000907,0.00001010,-0.00000378,0.00002776,-0.00007452,-0.000029
 58,0.00778608,0.00894894,-0.02089552,-0.00006635,-0.00004605,-0.000107
 05,0.00004906,-0.00000997,-0.00000120,0.00000344,0.00000462,0.00000453
 ,0.00002186,0.00000022,0.00000405,0.00000687,-0.00000655,-0.00000283,0
 .00039423,0.00097913,0.00085648,-0.03206877,-0.08337681,0.08443941,0.0
 0003051,0.00000354,-0.00001070,-0.00008620,-0.00006119,0.00005324,-0.0
 0000776,-0.00000261,-0.00000417,0.00000217,0.00000396,0.00000736,-0.00
 000771,0.00000048,0.00000516,-0.00000139,0.00000783,0.00000396,0.00000
 293,-0.00000384,0.00000332,-0.00099738,-0.00324849,-0.00300429,-0.0000
 1945,-0.00000161,0.00000546,0.00000857,0.00000745,-0.00000061,0.000005
 62,0.00000217,0.00000297,0.00000588,-0.00000075,0.00000544,0.00007825,
 -0.00017934,0.00016095,0.00042265,0.00066091,-0.00139506,-0.00021591,0
 .00015627,-0.00033424,-0.00157942,-0.00370942,0.00581076,0.03586558,0.
 08840647,-0.00056257,-0.00044821,0.00040458,0.00137213,0.00129934,0.00
 058094,0.00033403,-0.00011056,-0.00059838,-0.00001534,-0.00003905,0.00
 036971,-0.00032296,0.00003257,0.00022565,0.00003155,0.00002633,-0.0000
 0731,0.00000190,-0.00002342,-0.00005253,0.00659509,0.00923252,-0.01950
 016,-0.00001506,-0.00011112,-0.00011589,-0.00001411,-0.00001289,-0.000
 00907,-0.00001140,0.00000530,0.00003002,0.00000247,0.00000041,-0.00000
 028,0.00000429,-0.00000401,0.00000516,0.00034265,-0.00018515,0.0009656
 3,0.07586223,0.08283713,-0.24537567,0.00002400,0.00004202,-0.00004363,
 -0.00010610,-0.00002234,-0.00020850,-0.00003381,-0.00000365,-0.0000039
 2,0.00000127,0.00000990,0.00001063,-0.00000804,-0.00001305,0.00001096,
 -0.00000388,-0.00000717,0.00000681,0.00001143,0.00000663,0.00000502,-0
 .00117088,-0.00491854,-0.00269584,-0.00000814,-0.00002954,-0.00000380,
 -0.00000007,-0.00000160,-0.00000178,0.00000337,-0.00000251,0.00000122,
 0.00000880,-0.00000351,0.00000322,0.00003157,0.00000506,0.00034954,0.0
 0065544,0.00057919,-0.00136658,-0.00013820,-0.00000153,0.00035379,-0.0
 0085547,-0.00182144,0.00471377,-0.08361471,-0.08873293,0.26736617,0.00
 004328,0.00005257,-0.00001109,0.00083761,-0.00119859,0.00055678,0.0000
 9790,-0.00017526,0.00003748,-0.00004104,0.00009318,-0.00005013,-0.0000
 7412,0.00003200,0.00002830,-0.00000384,0.00000220,-0.00000078,-0.00000
 126,-0.00003280,-0.00002234,0.00107359,-0.00302824,0.00132915,-0.00003
 878,0.00001254,-0.00007637,0.00003629,-0.00001340,0.00003022,0.0000048
 5,0.00000457,0.00000601,0.00002010,0.00000410,-0.00000224,-0.00001111,
 0.00000228,-0.00000868,0.00083165,-0.00089866,-0.00042508,-0.11613981,
 0.10925481,-0.02884095,0.00002709,0.00002754,-0.00000490,0.00008044,0.
 00008205,-0.00018764,-0.00000065,-0.00000079,-0.00000892,0.00000573,0.
 00000270,0.00000564,-0.00000520,0.00000251,0.00000202,0.00000228,0.000
 00385,0.00000617,-0.00000248,-0.00000193,0.00000829,-0.00012072,0.0001
 9202,-0.00005377,-0.00000640,-0.00000250,0.00000188,0.00000896,0.00000
 355,-0.00000314,0.00000747,0.00000138,0.00000031,0.00000896,-0.0000029
 1,0.00000704,-0.00004947,0.00015460,-0.00003643,0.00003198,-0.00025171
 ,0.00014747,0.00015685,-0.00001075,0.00043343,-0.01529869,0.02688786,-
 0.00721858,0.00606701,-0.01054321,0.00159650,0.12245879,-0.00063100,0.
 00025413,-0.00009884,0.00194955,0.00045769,0.00104923,0.00084456,-0.00
 005450,-0.00033182,-0.00022091,0.00010438,0.00001382,-0.00043769,-0.00
 029856,0.00002781,0.00001464,0.00001638,-0.00000199,-0.00010866,0.0001
 7846,0.00003114,0.01178036,-0.02072707,0.00461549,0.00006619,-0.000004
 85,0.00005293,-0.00004558,-0.00002355,0.00001797,0.00000820,0.00000487
 ,0.00000182,-0.00001955,0.00000429,-0.00000517,-0.00001495,0.00001836,
 -0.00000331,-0.00121976,-0.00181998,-0.00393567,0.10877204,-0.22307658
 ,0.04645223,-0.00004181,0.00001667,0.00001993,-0.00113519,0.00005729,-
 0.00043015,-0.00002562,0.00000439,0.00001854,-0.00000682,-0.00000381,-
 0.00001150,0.00000402,-0.00001557,0.00000098,0.00000691,-0.00004341,-0
 .00000188,0.00000496,0.00003210,-0.00001418,-0.00035821,0.00080758,0.0
 0137770,0.00002106,-0.00000017,-0.00001186,-0.00000126,-0.00000285,-0.
 00000134,-0.00000066,-0.00000262,-0.00000461,-0.00000631,-0.00000675,-
 0.00000902,-0.00002552,0.00003757,-0.00010035,-0.00030446,0.00025867,-
 0.00006033,0.00006850,0.00072268,-0.00089672,-0.00397776,0.00819878,-0
 .00198085,0.00568361,-0.00951589,0.00241772,-0.12065394,0.24444433,-0.
 00010580,0.00008906,-0.00006129,0.00117574,0.00019765,0.00087561,0.000
 45010,-0.00000350,-0.00043590,-0.00005153,0.00002810,0.00020125,-0.000
 32199,-0.00026944,0.00006019,0.00001357,0.00000562,0.00000593,-0.00010
 840,0.00009425,-0.00002412,0.01346967,-0.02099055,0.00493681,-0.000025
 99,0.00000179,-0.00006524,0.00002167,-0.00001047,-0.00000154,0.0000005
 3,0.00000589,-0.00000199,0.00001254,-0.00000265,0.00000432,0.00001305,
 -0.00000233,-0.00001067,-0.00057598,-0.00352892,-0.00324245,-0.0289065
 3,0.04709408,-0.06041180,-0.00001030,-0.00001614,0.00000775,-0.0003857
 9,0.00020230,-0.00001686,-0.00001372,0.00000393,0.00000690,-0.00000291
 ,-0.00000285,0.00000118,-0.00000032,-0.00000717,-0.00000308,0.00001607
 ,-0.00002669,0.00000839,0.00001631,0.00000796,0.00000174,0.00048134,-0
 .00073871,0.00200738,-0.00000778,-0.00000139,-0.00000152,0.00000344,0.
 00000437,-0.00000021,0.00000343,0.00000232,0.00000158,0.00000116,0.000
 00045,0.00000437,0.00005370,0.00005456,-0.00014926,-0.00023850,0.00024
 791,0.00019969,-0.00035711,0.00041363,-0.00020795,-0.00104255,0.002263
 32,-0.00187362,-0.01634124,0.02305193,-0.00543297,0.03276925,-0.048170
 83,0.06362131,0.00089015,0.00117850,-0.00039151,-0.00017613,-0.0004797
 2,-0.00049007,0.00007587,0.00028340,-0.00015502,-0.00002913,-0.0001641
 3,0.00014442,0.00010066,-0.00015819,0.00001816,0.00000877,-0.00001207,
 0.00000659,-0.00005149,0.00006901,-0.00001009,-0.00014051,0.00008281,0
 .00002007,0.00931011,0.00737671,-0.00939051,-0.00047096,0.00105822,-0.
 00324338,-0.00066168,0.00044740,-0.00060271,-0.00500980,-0.00067218,-0
 .00261365,-0.01169579,-0.01801570,0.02138842,-0.00000687,-0.00001000,0
 .00000997,0.00007554,-0.00000965,-0.00000598,-0.13574712,-0.08171496,0
 .09462601,-0.00039962,0.00002366,-0.00063554,-0.00000458,0.00000328,-0
 .00000113,-0.00000251,0.00000475,-0.00000191,0.00000664,-0.00000585,-0
 .00000168,0.00000564,-0.00001368,0.00000331,0.00000902,-0.00000764,0.0
 0000565,0.00004157,-0.00002883,-0.00000945,0.00053796,0.00033109,-0.00
 056039,0.00000659,0.00010078,0.00018747,-0.00071403,-0.00085552,0.0010
 2538,0.00077701,0.00090812,0.00010061,0.00003208,0.00001310,0.00001362
 ,-0.00005672,0.00000658,0.00002288,-0.00002612,-0.00001931,-0.00000147
 ,0.00001431,0.00002969,0.00001630,-0.00000323,-0.00000269,0.00000203,-
 0.00000724,0.00001106,-0.00000513,0.14331161,-0.00184831,-0.00317458,-
 0.00215593,-0.00028322,0.00120260,-0.00119898,0.00007950,-0.00001580,0
 .00068725,0.00018326,0.00009041,-0.00020902,0.00013227,-0.00014576,-0.
 00024004,0.00001267,0.00000510,0.00002550,-0.00001568,-0.00003856,-0.0
 0001749,0.00006180,-0.00008814,0.00007581,-0.00709006,-0.00473234,0.00
 955011,0.00110520,0.00292236,0.00439881,0.00080551,-0.00026779,-0.0001
 4886,-0.00118623,0.00562482,0.00197632,-0.00099057,0.00116967,0.001934
 40,0.00002816,-0.00001430,-0.00000333,-0.00001933,0.00003738,-0.000009
 56,-0.08054514,-0.12264665,0.10737893,-0.00059962,0.00006503,-0.000188
 19,0.00000438,-0.00000051,-0.00000077,0.00000271,-0.00001711,-0.000015
 34,-0.00000191,0.00000473,-0.00001249,0.00000898,-0.00000411,0.0000098
 3,-0.00001231,0.00000601,-0.00001138,-0.00001977,0.00007988,0.00000474
 ,-0.00054798,-0.00017424,0.00048827,0.00008487,-0.00073275,-0.00050900
 ,-0.00002108,0.00013799,0.00023773,0.00040697,-0.00237521,-0.00236326,
 -0.00000379,-0.00002655,0.00000061,0.00003391,-0.00002435,-0.00002065,
 -0.00001375,-0.00003909,0.00001553,0.00000535,-0.00001269,0.00000433,0
 .00000290,0.00000399,-0.00000188,-0.00000164,-0.00002241,0.00000252,0.
 09024196,0.12320299,0.00133175,-0.00203758,-0.00037771,-0.00068930,0.0
 0075267,-0.00031074,-0.00014010,0.00075093,-0.00011625,-0.00010317,-0.
 00054202,0.00030827,0.00009785,-0.00016730,0.00003089,0.00001232,-0.00
 000692,0.00001069,-0.00002216,0.00008655,0.00001204,-0.00000466,-0.000
 50838,0.00030191,0.01495135,0.01294955,-0.01133939,-0.00418247,0.00393
 703,-0.00096524,-0.00046501,-0.00044650,-0.00017803,-0.00189335,0.0024
 6785,0.00293263,-0.00404072,-0.00304446,0.00642523,0.00018581,0.000030
 47,0.00001513,-0.00001369,0.00003921,-0.00003656,0.09320170,0.10821839
 ,-0.16929048,-0.00029468,-0.00084809,-0.00048579,-0.00000870,0.0000010
 1,0.00000101,-0.00000194,0.00000287,-0.00000547,0.00000657,-0.00000600
 ,-0.00000378,0.00000663,-0.00001725,0.00000147,0.00001098,-0.00001346,
 -0.00000064,-0.00010745,0.00005135,-0.00004619,0.00088886,0.00082022,-
 0.00046256,0.00018862,-0.00048752,-0.00036021,-0.00026582,-0.00006506,
 0.00018309,0.00081994,-0.00213001,-0.00066520,0.00001894,-0.00002459,0
 .00004291,-0.00000888,0.00000260,0.00000199,-0.00001871,-0.00005094,0.
 00001230,0.00002100,-0.00000397,0.00000945,0.00000466,0.00000071,0.000
 01352,-0.00001489,-0.00002689,-0.00000392,-0.09947129,-0.11968450,0.17
 434562||0.00000138,-0.00000140,-0.00000381,0.00000035,0.00000075,-0.00
 000104,0.00000398,0.00000432,0.00000481,-0.00000210,-0.00000103,-0.000
 00199,-0.00000269,-0.00000325,-0.00000301,0.00000085,0.00000033,0.0000
 0125,0.00000343,0.00000276,0.00000340,0.00000027,-0.00000045,-0.000002
 70,-0.00000088,-0.00000004,0.00000382,-0.00000010,0.00000065,0.0000021
 9,0.00000087,0.00000022,0.00000167,0.00000002,-0.00000080,0.00000126,-
 0.00000048,-0.00000163,0.00000152,0.00000042,0.00000127,-0.00000093,0.
 00000093,0.00000235,-0.00000360,0.00000008,-0.00000092,-0.00000068,-0.
 00000122,0.00000053,0.00000383,0.00000009,0.00000007,0.00000020,-0.000
 00004,-0.00000082,0.00000112,0.00000023,0.,0.00000126,0.00000033,-0.00
 000014,-0.00000053,-0.00000110,0.00000007,0.00000181,-0.00000287,-0.00
 000129,-0.00000260,0.00000084,0.00000065,0.00000106,0.00000053,0.00000
 017,0.00000234,-0.00000014,-0.00000121,0.00000201,-0.00000075,-0.00000
 179,0.00000050,-0.00000112,0.00000250,-0.00000179,0.00000174,-0.000001
 75,-0.00000105,-0.00000224,-0.00000244,-0.00000371,0.00000037,-0.00000
 114,-0.00000045,-0.00000282,0.00000285,-0.00000232,0.00000260,0.000002
 22,-0.00000405,-0.00000077,-0.00000161,0.00000020|||@


 A HARD FALL SHOULD MEAN A HIGH BOUNCE 
 IF ONE IS MADE OF THE RIGHT MATERIAL.

                -- THE CHEMIST ANALYST, MARCH 1950
 Job cpu time:  0 days  4 hours 45 minutes 29.0 seconds.
 File lengths (MBytes):  RWF=    646 Int=      0 D2E=      0 Chk=     14 Scr=      1
 Normal termination of Gaussian 03 at Sun Jul 14 22:58:21 2019.
