# Supplementary material for: Regio- and stereo-selective decarbonylative alkylative arylation of terminal alkynes with aliphatic aldehydes and arenes via dual C–H bond functionalization
Source: Royal Society of Chemistry journal article supplement (doi:10.1039/c9qo01009b), 2019-01-01
Supplement: c9qo01009b3.log [file c9qo01009b3.log]

 Entering Link 1 = C:\G03W\l1.exe PID=     60068.
  
 Copyright (c) 1988,1990,1992,1993,1995,1998,2003, Gaussian, Inc.
                  All Rights Reserved.
  
 This is the Gaussian(R) 03 program.  It is based on the
 the Gaussian(R) 98 system (copyright 1998, Gaussian, Inc.),
 the Gaussian(R) 94 system (copyright 1995, Gaussian, Inc.),
 the Gaussian 92(TM) system (copyright 1992, Gaussian, Inc.),
 the Gaussian 90(TM) system (copyright 1990, Gaussian, Inc.),
 the Gaussian 88(TM) system (copyright 1988, Gaussian, Inc.),
 the Gaussian 86(TM) system (copyright 1986, Carnegie Mellon
 University), and the Gaussian 82(TM) system (copyright 1983,
 Carnegie Mellon University). Gaussian is a federally registered
 trademark of Gaussian, Inc.
  
 This software contains proprietary and confidential information,
 including trade secrets, belonging to Gaussian, Inc.
  
 This software is provided under written license and may be
 used, copied, transmitted, or stored only in accord with that
 written license.
  
 The following legend is applicable only to US Government
 contracts under DFARS:
  
                    RESTRICTED RIGHTS LEGEND
  
 Use, duplication or disclosure by the US Government is subject
 to restrictions as set forth in subparagraph (c)(1)(ii) of the
 Rights in Technical Data and Computer Software clause at DFARS
 252.227-7013.
  
 Gaussian, Inc.
 Carnegie Office Park, Building 6, Pittsburgh, PA 15106 USA
  
 The following legend is applicable only to US Government
 contracts under FAR:
  
                    RESTRICTED RIGHTS LEGEND
  
 Use, reproduction and disclosure by the US Government is subject
 to restrictions as set forth in subparagraph (c) of the
 Commercial Computer Software - Restricted Rights clause at FAR
 52.227-19.
  
 Gaussian, Inc.
 Carnegie Office Park, Building 6, Pittsburgh, PA 15106 USA
  
  
 ---------------------------------------------------------------
 Warning -- This program may not be used in any manner that
 competes with the business of Gaussian, Inc. or will provide
 assistance to any competitor of Gaussian, Inc.  The licensee
 of this program is prohibited from giving any competitor of
 Gaussian, Inc. access to this program.  By using this program,
 the user acknowledges that Gaussian, Inc. is engaged in the
 business of creating and licensing software in the field of
 computational chemistry and represents and warrants to the
 licensee that it is not a competitor of Gaussian, Inc. and that
 it will not use this program in any manner prohibited above.
 ---------------------------------------------------------------
  

 Cite this work as:
 Gaussian 03, Revision B.05,
 M. J. Frisch, G. W. Trucks, H. B. Schlegel, G. E. Scuseria, 
 M. A. Robb, J. R. Cheeseman, J. A. Montgomery, Jr., T. Vreven, 
 K. N. Kudin, J. C. Burant, J. M. Millam, S. S. Iyengar, J. Tomasi, 
 V. Barone, B. Mennucci, M. Cossi, G. Scalmani, N. Rega, 
 G. A. Petersson, H. Nakatsuji, M. Hada, M. Ehara, K. Toyota, 
 R. Fukuda, J. Hasegawa, M. Ishida, T. Nakajima, Y. Honda, O. Kitao, 
 H. Nakai, M. Klene, X. Li, J. E. Knox, H. P. Hratchian, J. B. Cross, 
 C. Adamo, J. Jaramillo, R. Gomperts, R. E. Stratmann, O. Yazyev, 
 A. J. Austin, R. Cammi, C. Pomelli, J. W. Ochterski, P. Y. Ayala, 
 K. Morokuma, G. A. Voth, P. Salvador, J. J. Dannenberg, 
 V. G. Zakrzewski, S. Dapprich, A. D. Daniels, M. C. Strain, 
 O. Farkas, D. K. Malick, A. D. Rabuck, K. Raghavachari, 
 J. B. Foresman, J. V. Ortiz, Q. Cui, A. G. Baboul, S. Clifford, 
 J. Cioslowski, B. B. Stefanov, G. Liu, A. Liashenko, P. Piskorz, 
 I. Komaromi, R. L. Martin, D. J. Fox, T. Keith, M. A. Al-Laham, 
 C. Y. Peng, A. Nanayakkara, M. Challacombe, P. M. W. Gill, 
 B. Johnson, W. Chen, M. W. Wong, C. Gonzalez, and J. A. Pople, 
 Gaussian, Inc., Pittsburgh PA, 2003.
 
 **********************************************
 Gaussian 03:  x86-Win32-G03RevB.05  8-Nov-2003
                  14-Jul-2019 
 **********************************************
 %chk=C:\Users\Administrator\Documents\Gaussian Interface\pr-E_321_input.chk
 %mem=128MB
 %nprocshared=1
 Will use up to    1 processors via shared memory.
 Default route:  MaxDisk=2000MB
 -----------------------------------------------
 # freq rb3lyp/6-311+g(d) geom=connectivity test
 -----------------------------------------------
 1/10=4,30=1,38=1,57=2/1,3;
 2/17=6,18=5,40=1/2;
 3/5=4,6=6,7=11,11=2,16=1,25=1,30=1,74=-5/1,2,3;
 4/7=1/1;
 5/5=2,38=5/2;
 8/6=4,10=90,11=11,27=262144000/1;
 11/6=1,8=1,9=11,15=111,16=1/1,2,10;
 10/6=1/2;
 6/7=2,8=2,9=2,10=2,18=1,28=1/1;
 7/8=1,10=1,25=1/1,2,3,16;
 1/10=4,30=1/3;
 99//99;
 ----------
 [No Title]
 ----------
 Symbolic Z-matrix:
 Charge =  0 Multiplicity = 1
 C                     0.17333   0.01152  -0.00233 
 C                     0.45928   1.32447   0.05826 
 C                     1.27492  -1.00258  -0.03912 
 O                     1.09521  -2.19963  -0.03045 
 O                     2.5112   -0.45169  -0.08243 
 C                     4.89753  -0.56171  -0.16787 
 C                     3.62182  -1.3766   -0.12019 
 C                    -0.50119   2.47463   0.1737 
 C                    -1.21512  -0.53718  -0.02574 
 C                    -1.69009  -1.34044   1.01854 
 C                    -2.99154  -1.83425   1.00006 
 C                    -3.83846  -1.54411  -0.06943 
 C                    -3.37344  -0.75749  -1.12075 
 C                    -0.23649   3.23968   1.48464 
 C                    -0.3662    3.41364  -1.03924 
 C                    -2.07138  -0.25975  -1.09789 
 H                     1.51005   1.60513   0.05289 
 H                     4.9936    0.07569   0.71433 
 H                     4.92836   0.07377  -1.05608 
 H                     5.76249  -1.23013  -0.19892 
 H                     3.51253  -2.01938  -0.9966 
 H                     3.57611  -2.0155    0.76473 
 H                    -1.52472   2.092     0.20245 
 H                    -1.03484  -1.58188   1.84832 
 H                    -3.34364  -2.45188   1.8203 
 H                    -4.85136  -1.9338   -0.08515 
 H                    -4.02084  -0.53437  -1.96307 
 H                     0.78245   3.6399    1.51293 
 H                    -0.36682   2.594     2.35665 
 H                    -0.92682   4.08265   1.58327 
 H                     0.64801   3.81916  -1.11654 
 H                    -0.58906   2.89689  -1.97619 
 H                    -1.05477   4.25891  -0.94904 
 H                    -1.70985   0.34033  -1.92692 
 

 GradGradGradGradGradGradGradGradGradGradGradGradGradGradGradGradGradGrad
 Berny optimization.
 Initialization pass.
 Trust Radius=3.00D-01 FncErr=1.00D-07 GrdErr=1.00D-07
 Number of steps in this run=   2 maximum allowed number of steps=   2.
 GradGradGradGradGradGradGradGradGradGradGradGradGradGradGradGradGradGrad

                          Input orientation:                          
 ---------------------------------------------------------------------
 Center     Atomic     Atomic              Coordinates (Angstroms)
 Number     Number      Type              X           Y           Z
 ---------------------------------------------------------------------
    1          6             0        0.173325    0.011519   -0.002327
    2          6             0        0.459280    1.324474    0.058257
    3          6             0        1.274924   -1.002576   -0.039119
    4          8             0        1.095208   -2.199627   -0.030453
    5          8             0        2.511201   -0.451687   -0.082432
    6          6             0        4.897528   -0.561707   -0.167873
    7          6             0        3.621821   -1.376598   -0.120193
    8          6             0       -0.501186    2.474627    0.173696
    9          6             0       -1.215121   -0.537176   -0.025740
   10          6             0       -1.690088   -1.340440    1.018542
   11          6             0       -2.991539   -1.834250    1.000059
   12          6             0       -3.838461   -1.544108   -0.069433
   13          6             0       -3.373439   -0.757493   -1.120755
   14          6             0       -0.236493    3.239675    1.484638
   15          6             0       -0.366198    3.413639   -1.039236
   16          6             0       -2.071379   -0.259748   -1.097894
   17          1             0        1.510045    1.605133    0.052885
   18          1             0        4.993601    0.075690    0.714332
   19          1             0        4.928361    0.073772   -1.056083
   20          1             0        5.762493   -1.230126   -0.198922
   21          1             0        3.512529   -2.019378   -0.996597
   22          1             0        3.576111   -2.015501    0.764726
   23          1             0       -1.524721    2.091999    0.202445
   24          1             0       -1.034844   -1.581882    1.848315
   25          1             0       -3.343639   -2.451882    1.820301
   26          1             0       -4.851359   -1.933796   -0.085154
   27          1             0       -4.020843   -0.534370   -1.963070
   28          1             0        0.782446    3.639896    1.512931
   29          1             0       -0.366817    2.594001    2.356646
   30          1             0       -0.926818    4.082652    1.583272
   31          1             0        0.648011    3.819156   -1.116541
   32          1             0       -0.589055    2.896891   -1.976187
   33          1             0       -1.054768    4.258907   -0.949041
   34          1             0       -1.709846    0.340332   -1.926915
 ---------------------------------------------------------------------
                    Distance matrix (angstroms):
                    1          2          3          4          5
     1  C    0.000000
     2  C    1.345099   0.000000
     3  C    1.497753   2.467776   0.000000
     4  O    2.395793   3.582117   1.210497   0.000000
     5  O    2.384668   2.717521   1.354155   2.250118   0.000000
     6  C    4.761732   4.827718   3.651603   4.142379   2.390389
     7  C    3.719259   4.162848   2.377896   2.658797   1.445809
     8  C    2.559854   1.502888   3.910345   4.943562   4.207540
     9  C    1.493116   2.505277   2.533200   2.846293   3.727734
    10  C    2.518387   3.555798   3.166085   3.097816   4.433154
    11  C    3.798421   4.772073   4.469259   4.230479   5.776107
    12  C    4.303360   5.168718   5.142070   4.977179   6.442962
    13  C    3.797604   4.518229   4.778837   4.820510   5.983362
    14  C    3.577710   2.487299   4.754252   5.801287   4.861243
    15  C    3.597316   2.500103   4.816271   5.887453   4.912804
    16  C    2.512479   3.201668   3.587554   3.863914   4.697664
    17  H    2.080739   1.087615   2.619903   3.828215   2.291535
    18  H    4.873682   4.748680   3.944478   4.574849   2.659938
    19  H    4.870795   4.772703   3.942124   4.573109   2.658339
    20  H    5.728798   5.892045   4.496175   4.769891   3.345211
    21  H    4.032790   4.649343   2.637712   2.609476   2.072682
    22  H    4.034369   4.622680   2.639630   2.611722   2.072975
    23  H    2.693267   2.132169   4.180043   5.033520   4.779138
    24  H    2.724605   3.726073   3.038590   2.906630   4.192799
    25  H    4.664692   5.641618   5.185466   4.815837   6.473046
    26  H    5.388744   6.232157   6.196824   5.952757   7.510256
    27  H    4.661926   5.254766   5.653844   5.716823   6.797885
    28  H    3.978964   2.753487   4.919750   6.048131   4.719622
    29  H    3.539169   2.752586   4.622810   5.551093   4.848536
    30  H    4.505393   3.443034   5.774025   6.794095   5.929146
    31  H    3.995610   2.763912   4.980257   6.132318   4.772940
    32  H    3.578089   2.776772   4.736295   5.709389   4.940736
    33  H    4.521591   3.452229   5.825687   6.868687   5.971335
    34  H    2.712654   3.100734   3.778363   4.232764   4.674040
                    6          7          8          9         10
     6  C    0.000000
     7  C    1.514513   0.000000
     8  C    6.203395   5.649557   0.000000
     9  C    6.114350   4.910149   3.101683   0.000000
    10  C    6.738745   5.432716   4.084359   1.400483   0.000000
    11  C    8.075940   6.723164   5.044914   2.426999   1.392108
    12  C    8.791604   7.462335   5.229412   2.810291   2.416749
    13  C    8.327978   7.093524   4.513540   2.430213   2.783898
    14  C    6.598444   6.226720   1.540756   4.183725   4.827798
    15  C    6.653530   6.300421   1.539860   4.166147   5.346812
    16  C    7.037172   5.883518   3.399890   1.399878   2.406778
    17  H    4.027278   3.657906   2.194462   3.467304   4.455305
    18  H    1.092607   2.165030   6.019956   6.282638   6.838835
    19  H    1.092566   2.164835   6.062709   6.259172   7.078696
    20  H    1.093578   2.147121   7.286818   7.014076   7.552175
    21  H    2.174813   1.092335   6.138043   5.048778   5.620406
    22  H    2.174719   1.092414   6.093843   5.076040   5.315353
    23  H    6.958777   6.214673   1.093094   2.657157   3.531996
    24  H    6.348134   5.059812   4.420905   2.153136   1.084510
    25  H    8.685760   7.310225   5.921262   3.406546   2.147639
    26  H    9.845317   8.491553   6.198806   3.895678   3.400566
    27  H    9.097297   7.906697   5.099786   3.409594   3.869390
    28  H    6.116573   5.991190   2.190688   4.879110   5.582257
    29  H    6.636642   6.148953   2.190337   4.024879   4.361352
    30  H    7.652424   7.307210   2.180324   4.900495   5.505582
    31  H    6.176595   6.068947   2.189320   4.861968   6.053653
    32  H    6.733089   6.280040   2.192721   3.998627   5.304305
    33  H    7.699245   7.369965   2.179598   4.886779   5.968894
    34  H    6.896760   5.885471   3.229341   2.151567   3.391327
                   11         12         13         14         15
    11  C    0.000000
    12  C    1.394730   0.000000
    13  C    2.408964   1.392942   0.000000
    14  C    5.793946   6.186590   5.710154   0.000000
    15  C    6.212204   6.129958   5.142809   2.533185   0.000000
    16  C    2.779777   2.414517   1.394142   4.720407   4.050291
    17  H    5.743758   6.207995   5.550482   2.787838   2.825546
    18  H    8.215350   9.013509   8.606340   6.161011   6.553194
    19  H    8.401969   8.969291   8.343564   6.569164   6.259980
    20  H    8.856387   9.606959   9.194477   7.668202   7.735085
    21  H    6.806160   7.424457   7.001737   6.918767   6.675628
    22  H    6.574364   7.476223   7.309847   6.532312   6.947780
    23  H    4.266518   4.318401   3.645301   2.149584   2.151901
    24  H    2.147530   3.396977   3.868336   4.900718   5.808637
    25  H    1.085468   2.154065   3.394356   6.493138   7.172618
    26  H    2.155580   1.085388   2.154160   7.108167   7.044289
    27  H    3.395481   2.153763   1.085546   6.360142   5.458633
    28  H    6.668754   7.122539   6.598842   1.095086   2.807870
    29  H    5.323429   5.921327   5.688990   1.092830   3.493397
    30  H    6.293881   6.547482   6.060092   1.094024   2.763950
    31  H    7.048923   7.070323   6.092437   2.807896   1.095007
    32  H    6.083886   5.823815   4.673230   3.495584   1.092964
    33  H    6.684058   6.495971   5.529013   2.762463   1.093957
    34  H    3.865064   3.395932   2.150036   4.713348   3.469666
                   16         17         18         19         20
    16  C    0.000000
    17  H    4.198651   0.000000
    18  H    7.301412   3.861589   0.000000
    19  H    7.007806   3.906374   1.771618   0.000000
    20  H    7.944768   5.117169   1.769289   1.769365   0.000000
    21  H    5.855475   4.271819   3.083855   2.527725   2.514268
    22  H    6.200497   4.228988   2.526835   3.083665   2.515094
    23  H    2.742340   3.077208   6.842226   6.877456   8.018797
    24  H    3.391547   4.456130   6.354181   6.836412   7.107651
    25  H    3.865224   6.568210   8.781877   9.114741   9.406997
    26  H    3.399466   7.280833  10.079705  10.030751  10.637761
    27  H    2.150432   6.263567   9.423421   9.015582   9.965438
    28  H    5.492536   2.607948   5.574509   6.041993   7.172756
    29  H    4.794086   3.131738   6.145988   6.785071   7.663114
    30  H    5.230211   3.797168   7.201539   7.571026   8.726323
    31  H    4.902335   2.648123   6.020780   5.687966   7.245357
    32  H    3.596255   3.192490   6.809120   6.265658   7.780302
    33  H    4.633994   3.824217   7.539820   7.302373   8.784487
    34  H    1.085393   3.985853   7.209884   6.700388   7.828675
                   21         22         23         24         25
    21  H    0.000000
    22  H    1.762475   0.000000
    23  H    6.611733   6.573143   0.000000
    24  H    5.381777   4.756374   4.055400   0.000000
    25  H    7.424891   7.013388   5.154879   2.467432   0.000000
    26  H    8.413838   8.470609   5.230321   4.292777   2.484430
    27  H    7.738928   8.206603   4.221125   4.953799   4.295271
    28  H    6.765979   6.351999   3.071869   5.539133   7.364022
    29  H    6.897596   6.271236   2.496664   4.259420   5.883032
    30  H    7.974854   7.624556   2.495370   5.671760   6.971179
    31  H    6.504485   6.793832   3.073038   6.386985   7.992761
    32  H    6.477059   6.999486   2.503949   5.906348   7.114101
    33  H    7.763976   7.984374   2.498453   6.476142   7.612022
    34  H    5.805766   6.382493   2.763473   4.289860   4.950492
                   26         27         28         29         30
    26  H    0.000000
    27  H    2.484898   0.000000
    28  H    8.084533   7.251115   0.000000
    29  H    6.824548   6.465180   1.768207   0.000000
    30  H    7.374504   6.592907   1.767078   1.768556   0.000000
    31  H    8.025166   6.439565   2.639002   3.820197   3.136639
    32  H    6.714073   4.852926   3.821913   4.349089   3.766943
    33  H    7.315051   5.727247   3.133662   3.764672   2.541662
    34  H    4.293349   2.471258   5.378771   5.023111   5.190328
                   31         32         33         34
    31  H    0.000000
    32  H    1.766323   0.000000
    33  H    1.766605   1.768334   0.000000
    34  H    4.280001   2.791880   4.091527   0.000000
 Stoichiometry    C14H18O2
 Framework group  C1[X(C14H18O2)]
 Deg. of freedom    96
 Full point group                 C1      NOp   1
 Largest Abelian subgroup         C1      NOp   1
 Largest concise Abelian subgroup C1      NOp   1
                         Standard orientation:                         
 ---------------------------------------------------------------------
 Center     Atomic     Atomic              Coordinates (Angstroms)
 Number     Number      Type              X           Y           Z
 ---------------------------------------------------------------------
    1          6             0        0.173325    0.011519   -0.002327
    2          6             0        0.459280    1.324474    0.058257
    3          6             0        1.274924   -1.002576   -0.039119
    4          8             0        1.095208   -2.199627   -0.030453
    5          8             0        2.511201   -0.451687   -0.082432
    6          6             0        4.897528   -0.561707   -0.167873
    7          6             0        3.621821   -1.376598   -0.120193
    8          6             0       -0.501186    2.474627    0.173696
    9          6             0       -1.215121   -0.537176   -0.025740
   10          6             0       -1.690088   -1.340440    1.018542
   11          6             0       -2.991539   -1.834250    1.000059
   12          6             0       -3.838461   -1.544108   -0.069433
   13          6             0       -3.373439   -0.757493   -1.120755
   14          6             0       -0.236493    3.239675    1.484638
   15          6             0       -0.366198    3.413639   -1.039236
   16          6             0       -2.071379   -0.259748   -1.097894
   17          1             0        1.510045    1.605133    0.052885
   18          1             0        4.993601    0.075690    0.714332
   19          1             0        4.928361    0.073772   -1.056083
   20          1             0        5.762493   -1.230126   -0.198922
   21          1             0        3.512529   -2.019378   -0.996597
   22          1             0        3.576111   -2.015501    0.764726
   23          1             0       -1.524721    2.091999    0.202445
   24          1             0       -1.034844   -1.581882    1.848315
   25          1             0       -3.343639   -2.451882    1.820301
   26          1             0       -4.851359   -1.933796   -0.085154
   27          1             0       -4.020843   -0.534370   -1.963070
   28          1             0        0.782446    3.639896    1.512931
   29          1             0       -0.366817    2.594001    2.356646
   30          1             0       -0.926818    4.082652    1.583272
   31          1             0        0.648011    3.819156   -1.116541
   32          1             0       -0.589055    2.896891   -1.976187
   33          1             0       -1.054768    4.258907   -0.949041
   34          1             0       -1.709846    0.340332   -1.926915
 ---------------------------------------------------------------------
 Rotational constants (GHZ):      0.6185715      0.3564697      0.2556038
 Standard basis: 6-311+G(d) (5D, 7F)
 There are   406 symmetry adapted basis functions of A   symmetry.
 Integral buffers will be    262144 words long.
 Raffenetti 2 integral format.
 Two-electron integral symmetry is turned on.
   406 basis functions,   666 primitive gaussians,   422 cartesian basis functions
    59 alpha electrons       59 beta electrons
       nuclear repulsion energy      1067.5604354630 Hartrees.
 NAtoms=   34 NActive=   34 NUniq=   34 SFac= 1.00D+00 NAtFMM=   60 Big=F
 One-electron integrals computed using PRISM.
 NBasis=   406 RedAO= T  NBF=   406
 NBsUse=   405 1.00D-06 NBFU=   405
 Harris functional with IExCor=  402 diagonalized for initial guess.
 ExpMin= 4.38D-02 ExpMax= 8.59D+03 ExpMxC= 1.30D+03 IAcc=2 IRadAn=         4 AccDes= 0.00D+00
 HarFok:  IExCor= 402 AccDes= 0.00D+00 IRadAn=         4 IDoV=1
 ScaDFX=  1.000000  1.000000  1.000000  1.000000
 Initial guess orbital symmetries:
       Occupied  (A) (A) (A) (A) (A) (A) (A) (A) (A) (A) (A) (A)
                 (A) (A) (A) (A) (A) (A) (A) (A) (A) (A) (A) (A)
                 (A) (A) (A) (A) (A) (A) (A) (A) (A) (A) (A) (A)
                 (A) (A) (A) (A) (A) (A) (A) (A) (A) (A) (A) (A)
                 (A) (A) (A) (A) (A) (A) (A) (A) (A) (A) (A)
       Virtual   (A) (A) (A) (A) (A) (A) (A) (A) (A) (A) (A) (A)
                 (A) (A) (A) (A) (A) (A) (A) (A) (A) (A) (A) (A)
                 (A) (A) (A) (A) (A) (A) (A) (A) (A) (A) (A) (A)
                 (A) (A) (A) (A) (A) (A) (A) (A) (A) (A) (A) (A)
                 (A) (A) (A) (A) (A) (A) (A) (A) (A) (A) (A) (A)
                 (A) (A) (A) (A) (A) (A) (A) (A) (A) (A) (A) (A)
                 (A) (A) (A) (A) (A) (A) (A) (A) (A) (A) (A) (A)
                 (A) (A) (A) (A) (A) (A) (A) (A) (A) (A) (A) (A)
                 (A) (A) (A) (A) (A) (A) (A) (A) (A) (A) (A) (A)
                 (A) (A) (A) (A) (A) (A) (A) (A) (A) (A) (A) (A)
                 (A) (A) (A) (A) (A) (A) (A) (A) (A) (A) (A) (A)
                 (A) (A) (A) (A) (A) (A) (A) (A) (A) (A) (A) (A)
                 (A) (A) (A) (A) (A) (A) (A) (A) (A) (A) (A) (A)
                 (A) (A) (A) (A) (A) (A) (A) (A) (A) (A) (A) (A)
                 (A) (A) (A) (A) (A) (A) (A) (A) (A) (A) (A) (A)
                 (A) (A) (A) (A) (A) (A) (A) (A) (A) (A) (A) (A)
                 (A) (A) (A) (A) (A) (A) (A) (A) (A) (A) (A) (A)
                 (A) (A) (A) (A) (A) (A) (A) (A) (A) (A) (A) (A)
                 (A) (A) (A) (A) (A) (A) (A) (A) (A) (A) (A) (A)
                 (A) (A) (A) (A) (A) (A) (A) (A) (A) (A) (A) (A)
                 (A) (A) (A) (A) (A) (A) (A) (A) (A) (A) (A) (A)
                 (A) (A) (A) (A) (A) (A) (A) (A) (A) (A) (A) (A)
                 (A) (A) (A) (A) (A) (A) (A) (A) (A) (A) (A) (A)
                 (A) (A) (A) (A) (A) (A) (A) (A) (A) (A) (A) (A)
                 (A) (A) (A) (A) (A) (A) (A) (A) (A) (A) (A) (A)
                 (A) (A) (A) (A) (A) (A) (A) (A) (A) (A) (A) (A)
                 (A) (A) (A) (A) (A) (A) (A) (A) (A) (A) (A) (A)
                 (A) (A) (A) (A) (A) (A) (A) (A) (A) (A) (A) (A)
                 (A) (A) (A) (A) (A) (A) (A) (A) (A) (A)
 The electronic state of the initial guess is 1-A.
 Requested convergence on RMS density matrix=1.00D-08 within 128 cycles.
 Requested convergence on MAX density matrix=1.00D-06.
 Requested convergence on             energy=1.00D-06.
 No special actions if energy rises.
 SCF Done:  E(RB+HF-LYP) =  -694.951642836     A.U. after   16 cycles
             Convg  =    0.4090D-08             -V/T =  2.0042
             S**2   =   0.0000
 Range of M.O.s used for correlation:     1   405
 NBasis=   406 NAE=    59 NBE=    59 NFC=     0 NFV=     0
 NROrb=    405 NOA=    59 NOB=    59 NVA=   346 NVB=   346

 **** Warning!!: The largest alpha MO coefficient is  0.14606251D+03

 Symmetrizing basis deriv contribution to polar:
 IMax=3 JMax=2 DiffMx= 0.00D+00
 G2DrvN: will do   18 centers at a time, making    2 passes doing MaxLOS=2.
 FoFDir/FoFCou used for L=0 through L=2.
          Differentiating once with respect to electric field.
                with respect to dipole field.
          Differentiating once with respect to nuclear coordinates.
 Integrals replicated using symmetry in FoFDir.
 MinBra= 0 MaxBra= 2 Meth= 1.
 IRaf=       0 NMat=  53 IRICut=      53 DoRegI=T DoRafI=T ISym2E= 2 JSym2E=2.
          There are 105 degrees of freedom in the 1st order CPHF.
   105 vectors were produced by pass  0.
 AX will form  53 AO Fock derivatives at one time.
   105 vectors were produced by pass  1.
   102 vectors were produced by pass  2.
   102 vectors were produced by pass  3.
   102 vectors were produced by pass  4.
   102 vectors were produced by pass  5.
    73 vectors were produced by pass  6.
    27 vectors were produced by pass  7.
    11 vectors were produced by pass  8.
     2 vectors were produced by pass  9.
 Inv2:  IOpt= 1 Iter= 1 AM= 1.87D-13 Conv= 1.00D-12.
 Inverted reduced A of dimension  731 with in-core refinement.
 Isotropic polarizability for W=    0.000000      173.07 Bohr**3.
 End of Minotr Frequency-dependent properties file   721 does not exist.

 **********************************************************************

            Population analysis using the SCF density.

 **********************************************************************

 Orbital symmetries:
       Occupied  (A) (A) (A) (A) (A) (A) (A) (A) (A) (A) (A) (A)
                 (A) (A) (A) (A) (A) (A) (A) (A) (A) (A) (A) (A)
                 (A) (A) (A) (A) (A) (A) (A) (A) (A) (A) (A) (A)
                 (A) (A) (A) (A) (A) (A) (A) (A) (A) (A) (A) (A)
                 (A) (A) (A) (A) (A) (A) (A) (A) (A) (A) (A)
       Virtual   (A) (A) (A) (A) (A) (A) (A) (A) (A) (A) (A) (A)
                 (A) (A) (A) (A) (A) (A) (A) (A) (A) (A) (A) (A)
                 (A) (A) (A) (A) (A) (A) (A) (A) (A) (A) (A) (A)
                 (A) (A) (A) (A) (A) (A) (A) (A) (A) (A) (A) (A)
                 (A) (A) (A) (A) (A) (A) (A) (A) (A) (A) (A) (A)
                 (A) (A) (A) (A) (A) (A) (A) (A) (A) (A) (A) (A)
                 (A) (A) (A) (A) (A) (A) (A) (A) (A) (A) (A) (A)
                 (A) (A) (A) (A) (A) (A) (A) (A) (A) (A) (A) (A)
                 (A) (A) (A) (A) (A) (A) (A) (A) (A) (A) (A) (A)
                 (A) (A) (A) (A) (A) (A) (A) (A) (A) (A) (A) (A)
                 (A) (A) (A) (A) (A) (A) (A) (A) (A) (A) (A) (A)
                 (A) (A) (A) (A) (A) (A) (A) (A) (A) (A) (A) (A)
                 (A) (A) (A) (A) (A) (A) (A) (A) (A) (A) (A) (A)
                 (A) (A) (A) (A) (A) (A) (A) (A) (A) (A) (A) (A)
                 (A) (A) (A) (A) (A) (A) (A) (A) (A) (A) (A) (A)
                 (A) (A) (A) (A) (A) (A) (A) (A) (A) (A) (A) (A)
                 (A) (A) (A) (A) (A) (A) (A) (A) (A) (A) (A) (A)
                 (A) (A) (A) (A) (A) (A) (A) (A) (A) (A) (A) (A)
                 (A) (A) (A) (A) (A) (A) (A) (A) (A) (A) (A) (A)
                 (A) (A) (A) (A) (A) (A) (A) (A) (A) (A) (A) (A)
                 (A) (A) (A) (A) (A) (A) (A) (A) (A) (A) (A) (A)
                 (A) (A) (A) (A) (A) (A) (A) (A) (A) (A) (A) (A)
                 (A) (A) (A) (A) (A) (A) (A) (A) (A) (A) (A) (A)
                 (A) (A) (A) (A) (A) (A) (A) (A) (A) (A) (A) (A)
                 (A) (A) (A) (A) (A) (A) (A) (A) (A) (A) (A) (A)
                 (A) (A) (A) (A) (A) (A) (A) (A) (A) (A) (A) (A)
                 (A) (A) (A) (A) (A) (A) (A) (A) (A) (A) (A) (A)
                 (A) (A) (A) (A) (A) (A) (A) (A) (A) (A) (A) (A)
                 (A) (A) (A) (A) (A) (A) (A) (A) (A) (A)
 The electronic state is 1-A.
 Alpha  occ. eigenvalues --  -19.16372 -19.10712 -10.30013 -10.22949 -10.19427
 Alpha  occ. eigenvalues --  -10.19098 -10.18726 -10.18725 -10.17678 -10.17606
 Alpha  occ. eigenvalues --  -10.17553 -10.17499 -10.17444 -10.17131 -10.16795
 Alpha  occ. eigenvalues --  -10.16678  -1.10565  -1.01823  -0.86687  -0.83354
 Alpha  occ. eigenvalues --   -0.79407  -0.77405  -0.74938  -0.73280  -0.69423
 Alpha  occ. eigenvalues --   -0.66505  -0.63560  -0.60928  -0.60025  -0.57385
 Alpha  occ. eigenvalues --   -0.55787  -0.52304  -0.50933  -0.49740  -0.47966
 Alpha  occ. eigenvalues --   -0.46295  -0.45779  -0.44759  -0.44117  -0.42973
 Alpha  occ. eigenvalues --   -0.42347  -0.41903  -0.41101  -0.40890  -0.39900
 Alpha  occ. eigenvalues --   -0.39585  -0.37224  -0.36810  -0.36108  -0.35749
 Alpha  occ. eigenvalues --   -0.35600  -0.34957  -0.34895  -0.33721  -0.30710
 Alpha  occ. eigenvalues --   -0.27944  -0.27823  -0.25530  -0.24562
 Alpha virt. eigenvalues --   -0.04957  -0.01516  -0.01215  -0.00300   0.00761
 Alpha virt. eigenvalues --    0.01264   0.01932   0.02654   0.02886   0.03534
 Alpha virt. eigenvalues --    0.03906   0.03959   0.04769   0.05399   0.05561
 Alpha virt. eigenvalues --    0.05726   0.06503   0.07019   0.07290   0.07519
 Alpha virt. eigenvalues --    0.07783   0.08024   0.08387   0.08938   0.09509
 Alpha virt. eigenvalues --    0.09954   0.10431   0.10771   0.10948   0.11218
 Alpha virt. eigenvalues --    0.12083   0.12542   0.12826   0.13383   0.13662
 Alpha virt. eigenvalues --    0.14052   0.14381   0.14965   0.15569   0.16094
 Alpha virt. eigenvalues --    0.16223   0.16699   0.16942   0.17437   0.18579
 Alpha virt. eigenvalues --    0.18712   0.18780   0.19082   0.19760   0.19917
 Alpha virt. eigenvalues --    0.20101   0.20458   0.20675   0.20812   0.21154
 Alpha virt. eigenvalues --    0.21366   0.22017   0.22249   0.22506   0.22867
 Alpha virt. eigenvalues --    0.22940   0.23313   0.23542   0.23855   0.24335
 Alpha virt. eigenvalues --    0.24470   0.25024   0.25235   0.25516   0.25742
 Alpha virt. eigenvalues --    0.26136   0.26856   0.27045   0.27453   0.27926
 Alpha virt. eigenvalues --    0.28063   0.28448   0.28811   0.29403   0.29866
 Alpha virt. eigenvalues --    0.30457   0.31398   0.32139   0.32495   0.33045
 Alpha virt. eigenvalues --    0.33323   0.34058   0.34959   0.35330   0.35982
 Alpha virt. eigenvalues --    0.37292   0.37789   0.38364   0.39413   0.40793
 Alpha virt. eigenvalues --    0.41412   0.41971   0.42414   0.44109   0.44553
 Alpha virt. eigenvalues --    0.45302   0.48004   0.48522   0.49797   0.50722
 Alpha virt. eigenvalues --    0.51546   0.51952   0.52292   0.53458   0.53759
 Alpha virt. eigenvalues --    0.54351   0.54973   0.55623   0.55982   0.57242
 Alpha virt. eigenvalues --    0.57638   0.59002   0.59184   0.59575   0.60437
 Alpha virt. eigenvalues --    0.61308   0.61732   0.62285   0.62755   0.64319
 Alpha virt. eigenvalues --    0.64792   0.65425   0.66572   0.66964   0.67631
 Alpha virt. eigenvalues --    0.68150   0.68573   0.69139   0.69803   0.70195
 Alpha virt. eigenvalues --    0.70644   0.70851   0.71721   0.71974   0.72377
 Alpha virt. eigenvalues --    0.72909   0.73540   0.74116   0.74832   0.75105
 Alpha virt. eigenvalues --    0.75487   0.75893   0.76071   0.77447   0.77988
 Alpha virt. eigenvalues --    0.79002   0.79392   0.80597   0.81862   0.83632
 Alpha virt. eigenvalues --    0.84588   0.85110   0.85550   0.86310   0.88334
 Alpha virt. eigenvalues --    0.90901   0.91739   0.92186   0.93376   0.95168
 Alpha virt. eigenvalues --    0.97509   0.99730   1.00692   1.02175   1.02539
 Alpha virt. eigenvalues --    1.03670   1.06645   1.07813   1.08943   1.09992
 Alpha virt. eigenvalues --    1.11185   1.12079   1.12944   1.15501   1.18122
 Alpha virt. eigenvalues --    1.19332   1.19682   1.21950   1.22706   1.23815
 Alpha virt. eigenvalues --    1.25257   1.26220   1.30634   1.31299   1.33351
 Alpha virt. eigenvalues --    1.34428   1.37783   1.39807   1.42379   1.42648
 Alpha virt. eigenvalues --    1.46143   1.47731   1.50083   1.51926   1.52943
 Alpha virt. eigenvalues --    1.53981   1.54468   1.56288   1.57934   1.59443
 Alpha virt. eigenvalues --    1.59584   1.61420   1.62126   1.62546   1.63313
 Alpha virt. eigenvalues --    1.63455   1.65424   1.66174   1.68459   1.69257
 Alpha virt. eigenvalues --    1.71071   1.71648   1.74169   1.74414   1.76187
 Alpha virt. eigenvalues --    1.76845   1.78994   1.80270   1.81448   1.81996
 Alpha virt. eigenvalues --    1.83093   1.86098   1.89193   1.90648   1.92164
 Alpha virt. eigenvalues --    1.93648   1.94270   1.95685   1.96686   1.99004
 Alpha virt. eigenvalues --    1.99809   2.00232   2.01430   2.05402   2.08613
 Alpha virt. eigenvalues --    2.12551   2.15969   2.16790   2.19022   2.25128
 Alpha virt. eigenvalues --    2.28223   2.29557   2.31191   2.33803   2.36905
 Alpha virt. eigenvalues --    2.39485   2.41449   2.43061   2.44388   2.46313
 Alpha virt. eigenvalues --    2.47616   2.48252   2.50794   2.51138   2.52977
 Alpha virt. eigenvalues --    2.54790   2.55767   2.56398   2.57922   2.62055
 Alpha virt. eigenvalues --    2.66393   2.67643   2.68865   2.68938   2.70902
 Alpha virt. eigenvalues --    2.77040   2.79032   2.81428   2.82905   2.83318
 Alpha virt. eigenvalues --    2.85927   2.88592   2.89646   2.91211   2.93946
 Alpha virt. eigenvalues --    2.95032   2.98062   2.99655   3.01424   3.05045
 Alpha virt. eigenvalues --    3.06789   3.07165   3.10328   3.10981   3.15178
 Alpha virt. eigenvalues --    3.16707   3.17590   3.19232   3.19912   3.21336
 Alpha virt. eigenvalues --    3.22136   3.23338   3.23764   3.24487   3.30750
 Alpha virt. eigenvalues --    3.31222   3.32149   3.33075   3.35202   3.35920
 Alpha virt. eigenvalues --    3.39179   3.42858   3.49236   3.59661   3.61617
 Alpha virt. eigenvalues --    3.63201   3.65533   3.69079   3.74765   3.84616
 Alpha virt. eigenvalues --    3.96024   3.99327   4.01953   4.03429   4.06094
 Alpha virt. eigenvalues --    4.14696   4.30573   4.37959   4.79595   5.00683
 Alpha virt. eigenvalues --    5.08825   5.24910   5.34470   5.63882   5.87171
 Alpha virt. eigenvalues --   23.36395  23.49107  23.51697  23.62121  23.66581
 Alpha virt. eigenvalues --   23.69015  23.78210  23.85814  23.86136  23.89262
 Alpha virt. eigenvalues --   24.02765  24.04957  24.14015  24.21772  49.90629
 Alpha virt. eigenvalues --   50.04940
          Condensed to atoms (all electrons):
              1          2          3          4          5          6
     1  C   34.095595  -7.887007 -16.026053  -0.137307  -0.796403  -0.318027
     2  C   -7.887007  19.195312  -2.459334  -0.008223   0.283145  -0.073153
     3  C  -16.026053  -2.459334  25.065029   0.363209   0.269031   0.400251
     4  O   -0.137307  -0.008223   0.363209   8.088608  -0.183534   0.012594
     5  O   -0.796403   0.283145   0.269031  -0.183534   8.446576  -0.164630
     6  C   -0.318027  -0.073153   0.400251   0.012594  -0.164630   6.054094
     7  C   -1.704010   0.177944   0.847538  -0.090578   0.261895  -0.060772
     8  C    1.721618  -4.502363  -0.753357   0.041767   0.020235  -0.017028
     9  C   -2.737980   1.714154  -1.032597   0.142505  -0.063462   0.008050
    10  C   -0.441907  -0.739357  -0.746559   0.073308   0.032023  -0.003868
    11  C    0.513081   0.058272  -0.001918  -0.002740   0.013334   0.000209
    12  C   -0.583065  -0.220909   0.167858   0.011163  -0.003081   0.000481
    13  C    0.019292   1.248965  -0.507507  -0.011832   0.015003  -0.003211
    14  C   -0.012565   0.156461  -0.155624  -0.002347   0.003443  -0.002608
    15  C    0.376923  -0.288448  -0.039013   0.000975  -0.004046  -0.000077
    16  C   -1.704830  -0.799775   1.813052  -0.061404  -0.053485   0.010013
    17  H   -0.126323   0.419176   0.041505  -0.001358   0.015101   0.004484
    18  H   -0.004845   0.001776  -0.006886  -0.000395  -0.006083   0.376045
    19  H    0.004310   0.003895  -0.012278  -0.000233  -0.006625   0.368328
    20  H    0.004287  -0.002618   0.013063   0.000347   0.016421   0.420371
    21  H    0.032364  -0.005413  -0.000163  -0.001672  -0.050429  -0.042211
    22  H    0.044331  -0.013405  -0.014233   0.000494  -0.049762  -0.041190
    23  H    0.020023  -0.086797  -0.071237  -0.000074  -0.000033  -0.000001
    24  H    0.072445  -0.054096   0.112392  -0.006370  -0.001617   0.000227
    25  H   -0.012761  -0.004352   0.006210   0.000019  -0.000017   0.000003
    26  H    0.016330   0.001462  -0.001806   0.000000   0.000002  -0.000001
    27  H    0.000734  -0.006058  -0.001294   0.000001  -0.000009   0.000000
    28  H    0.034388  -0.081974  -0.009921   0.000001   0.000055  -0.000038
    29  H    0.009798  -0.081063   0.007159   0.000052  -0.000186  -0.000076
    30  H   -0.002958   0.134898   0.003819   0.000002   0.000014   0.000027
    31  H    0.043733  -0.109044  -0.016813   0.000008  -0.000103  -0.000123
    32  H   -0.007246  -0.045098   0.014633   0.000043  -0.000096  -0.000044
    33  H   -0.025988   0.167987   0.000831   0.000000   0.000028   0.000024
    34  H    0.097846   0.021218   0.009843  -0.000362  -0.000029   0.000017
              7          8          9         10         11         12
     1  C   -1.704010   1.721618  -2.737980  -0.441907   0.513081  -0.583065
     2  C    0.177944  -4.502363   1.714154  -0.739357   0.058272  -0.220909
     3  C    0.847538  -0.753357  -1.032597  -0.746559  -0.001918   0.167858
     4  O   -0.090578   0.041767   0.142505   0.073308  -0.002740   0.011163
     5  O    0.261895   0.020235  -0.063462   0.032023   0.013334  -0.003081
     6  C   -0.060772  -0.017028   0.008050  -0.003868   0.000209   0.000481
     7  C    6.050926  -0.008508  -0.029784  -0.010131   0.007145   0.002644
     8  C   -0.008508  10.005808  -0.599965  -0.079888  -0.020439  -0.010234
     9  C   -0.029784  -0.599965  14.013943  -2.082622  -1.075930  -1.276033
    10  C   -0.010131  -0.079888  -2.082622  19.265447  -0.875029   0.790334
    11  C    0.007145  -0.020439  -1.075930  -0.875029   7.599468   0.209564
    12  C    0.002644  -0.010234  -1.276033   0.790334   0.209564   6.446645
    13  C   -0.004111   0.126607  -0.335132  -1.088346   0.113358  -0.016203
    14  C   -0.003006  -0.061123   0.056175  -0.098682  -0.021879   0.002451
    15  C   -0.003097  -0.189649   0.028131   0.117658   0.012795  -0.001576
    16  C    0.026426  -0.105102  -1.747228  -7.810892  -0.477658   0.488516
    17  H   -0.006464  -0.009980  -0.009274  -0.010783   0.001848  -0.000315
    18  H   -0.010131  -0.000035   0.000185  -0.000328   0.000016  -0.000001
    19  H   -0.008680   0.000546  -0.001103   0.000369   0.000019  -0.000002
    20  H   -0.093811  -0.000022   0.000095  -0.000119  -0.000013   0.000000
    21  H    0.396147  -0.000465  -0.002139   0.002599   0.000037  -0.000054
    22  H    0.402196  -0.000371   0.000518  -0.006624   0.000095  -0.000034
    23  H   -0.000965   0.462491  -0.013930   0.003645  -0.002949   0.008307
    24  H    0.001792   0.000860  -0.014696   0.206409   0.006447  -0.012075
    25  H    0.000042  -0.000384   0.013145   0.033067   0.244877   0.058816
    26  H   -0.000007   0.000615   0.050897  -0.061145   0.075565   0.234146
    27  H   -0.000022   0.000838   0.025710   0.000084  -0.021933   0.051427
    28  H   -0.000478   0.047350  -0.005280   0.001739   0.000017  -0.000012
    29  H    0.000536   0.025455  -0.002396   0.006641   0.002372   0.000182
    30  H    0.000008  -0.186458   0.005062   0.002456   0.000507   0.000289
    31  H   -0.000213   0.043047  -0.007930  -0.001097  -0.000323   0.000352
    32  H    0.000321   0.043447  -0.027310  -0.005623   0.000779  -0.001480
    33  H   -0.000016  -0.219526   0.012891   0.001379  -0.000306   0.000093
    34  H    0.000124   0.026957  -0.033975  -0.037273   0.001667  -0.017638
             13         14         15         16         17         18
     1  C    0.019292  -0.012565   0.376923  -1.704830  -0.126323  -0.004845
     2  C    1.248965   0.156461  -0.288448  -0.799775   0.419176   0.001776
     3  C   -0.507507  -0.155624  -0.039013   1.813052   0.041505  -0.006886
     4  O   -0.011832  -0.002347   0.000975  -0.061404  -0.001358  -0.000395
     5  O    0.015003   0.003443  -0.004046  -0.053485   0.015101  -0.006083
     6  C   -0.003211  -0.002608  -0.000077   0.010013   0.004484   0.376045
     7  C   -0.004111  -0.003006  -0.003097   0.026426  -0.006464  -0.010131
     8  C    0.126607  -0.061123  -0.189649  -0.105102  -0.009980  -0.000035
     9  C   -0.335132   0.056175   0.028131  -1.747228  -0.009274   0.000185
    10  C   -1.088346  -0.098682   0.117658  -7.810892  -0.010783  -0.000328
    11  C    0.113358  -0.021879   0.012795  -0.477658   0.001848   0.000016
    12  C   -0.016203   0.002451  -0.001576   0.488516  -0.000315  -0.000001
    13  C    8.627271   0.019505  -0.059662  -2.004861   0.003222  -0.000006
    14  C    0.019505   6.531423  -0.438620  -0.085229  -0.002058   0.000045
    15  C   -0.059662  -0.438620   6.348244  -0.009174  -0.008517   0.000095
    16  C   -2.004861  -0.085229  -0.009174  18.949130   0.010587   0.000076
    17  H    0.003222  -0.002058  -0.008517   0.010587   0.425445   0.000097
    18  H   -0.000006   0.000045   0.000095   0.000076   0.000097   0.464217
    19  H    0.000026   0.000108   0.000022  -0.000263   0.000148  -0.031853
    20  H   -0.000004  -0.000005  -0.000012   0.000005  -0.000029  -0.028401
    21  H   -0.000193   0.000095  -0.000012  -0.004285  -0.000051   0.006442
    22  H    0.000002   0.000017   0.000080   0.003027   0.000046  -0.008113
    23  H    0.008258  -0.048115  -0.038200   0.055881   0.003784   0.000000
    24  H   -0.013554  -0.001424   0.000435   0.021617  -0.000057   0.000000
    25  H   -0.025753  -0.000041  -0.000005   0.008623   0.000000   0.000000
    26  H    0.076888   0.000025  -0.000027  -0.070052   0.000000   0.000000
    27  H    0.249642   0.000265  -0.000488   0.022463  -0.000001   0.000000
    28  H    0.000549   0.364902  -0.004549   0.000129   0.001015  -0.000001
    29  H   -0.001814   0.377955   0.013748  -0.004764   0.000627   0.000000
    30  H   -0.003088   0.373613   0.012178   0.001661  -0.000417   0.000000
    31  H    0.000810   0.016069   0.377980   0.004844   0.001511   0.000000
    32  H    0.011772  -0.004028   0.359301   0.013088   0.000163   0.000000
    33  H   -0.001658   0.002264   0.406459  -0.000496  -0.000448   0.000000
    34  H    0.053291   0.002377  -0.010729   0.212862  -0.000146   0.000000
             19         20         21         22         23         24
     1  C    0.004310   0.004287   0.032364   0.044331   0.020023   0.072445
     2  C    0.003895  -0.002618  -0.005413  -0.013405  -0.086797  -0.054096
     3  C   -0.012278   0.013063  -0.000163  -0.014233  -0.071237   0.112392
     4  O   -0.000233   0.000347  -0.001672   0.000494  -0.000074  -0.006370
     5  O   -0.006625   0.016421  -0.050429  -0.049762  -0.000033  -0.001617
     6  C    0.368328   0.420371  -0.042211  -0.041190  -0.000001   0.000227
     7  C   -0.008680  -0.093811   0.396147   0.402196  -0.000965   0.001792
     8  C    0.000546  -0.000022  -0.000465  -0.000371   0.462491   0.000860
     9  C   -0.001103   0.000095  -0.002139   0.000518  -0.013930  -0.014696
    10  C    0.000369  -0.000119   0.002599  -0.006624   0.003645   0.206409
    11  C    0.000019  -0.000013   0.000037   0.000095  -0.002949   0.006447
    12  C   -0.000002   0.000000  -0.000054  -0.000034   0.008307  -0.012075
    13  C    0.000026  -0.000004  -0.000193   0.000002   0.008258  -0.013554
    14  C    0.000108  -0.000005   0.000095   0.000017  -0.048115  -0.001424
    15  C    0.000022  -0.000012  -0.000012   0.000080  -0.038200   0.000435
    16  C   -0.000263   0.000005  -0.004285   0.003027   0.055881   0.021617
    17  H    0.000148  -0.000029  -0.000051   0.000046   0.003784  -0.000057
    18  H   -0.031853  -0.028401   0.006442  -0.008113   0.000000   0.000000
    19  H    0.464054  -0.028314  -0.008025   0.006311   0.000000   0.000000
    20  H   -0.028314   0.450195  -0.002817  -0.002892   0.000000   0.000000
    21  H   -0.008025  -0.002817   0.478148  -0.042817   0.000000   0.000010
    22  H    0.006311  -0.002892  -0.042817   0.477902   0.000001   0.000015
    23  H    0.000000   0.000000   0.000000   0.000001   0.453254  -0.000083
    24  H    0.000000   0.000000   0.000010   0.000015  -0.000083   0.477641
    25  H    0.000000   0.000000   0.000000   0.000000  -0.000016  -0.005780
    26  H    0.000000   0.000000   0.000000   0.000000  -0.000008  -0.000316
    27  H    0.000000   0.000000   0.000000   0.000000  -0.000033   0.000089
    28  H    0.000001   0.000000   0.000000   0.000000   0.005727   0.000004
    29  H    0.000000   0.000000   0.000000   0.000000  -0.004793  -0.000035
    30  H    0.000000   0.000000   0.000000   0.000000  -0.004810   0.000005
    31  H    0.000000   0.000000   0.000000   0.000000   0.005492  -0.000001
    32  H    0.000000   0.000000   0.000000   0.000000  -0.005975   0.000002
    33  H    0.000000   0.000000   0.000000   0.000000  -0.005119   0.000000
    34  H    0.000000   0.000000  -0.000001   0.000001  -0.001097  -0.000314
             25         26         27         28         29         30
     1  C   -0.012761   0.016330   0.000734   0.034388   0.009798  -0.002958
     2  C   -0.004352   0.001462  -0.006058  -0.081974  -0.081063   0.134898
     3  C    0.006210  -0.001806  -0.001294  -0.009921   0.007159   0.003819
     4  O    0.000019   0.000000   0.000001   0.000001   0.000052   0.000002
     5  O   -0.000017   0.000002  -0.000009   0.000055  -0.000186   0.000014
     6  C    0.000003  -0.000001   0.000000  -0.000038  -0.000076   0.000027
     7  C    0.000042  -0.000007  -0.000022  -0.000478   0.000536   0.000008
     8  C   -0.000384   0.000615   0.000838   0.047350   0.025455  -0.186458
     9  C    0.013145   0.050897   0.025710  -0.005280  -0.002396   0.005062
    10  C    0.033067  -0.061145   0.000084   0.001739   0.006641   0.002456
    11  C    0.244877   0.075565  -0.021933   0.000017   0.002372   0.000507
    12  C    0.058816   0.234146   0.051427  -0.000012   0.000182   0.000289
    13  C   -0.025753   0.076888   0.249642   0.000549  -0.001814  -0.003088
    14  C   -0.000041   0.000025   0.000265   0.364902   0.377955   0.373613
    15  C   -0.000005  -0.000027  -0.000488  -0.004549   0.013748   0.012178
    16  C    0.008623  -0.070052   0.022463   0.000129  -0.004764   0.001661
    17  H    0.000000   0.000000  -0.000001   0.001015   0.000627  -0.000417
    18  H    0.000000   0.000000   0.000000  -0.000001   0.000000   0.000000
    19  H    0.000000   0.000000   0.000000   0.000001   0.000000   0.000000
    20  H    0.000000   0.000000   0.000000   0.000000   0.000000   0.000000
    21  H    0.000000   0.000000   0.000000   0.000000   0.000000   0.000000
    22  H    0.000000   0.000000   0.000000   0.000000   0.000000   0.000000
    23  H   -0.000016  -0.000008  -0.000033   0.005727  -0.004793  -0.004810
    24  H   -0.005780  -0.000316   0.000089   0.000004  -0.000035   0.000005
    25  H    0.474378  -0.006764  -0.000319   0.000000   0.000000   0.000000
    26  H   -0.006764   0.474638  -0.006732   0.000000   0.000000   0.000000
    27  H   -0.000319  -0.006732   0.476207   0.000000   0.000000   0.000000
    28  H    0.000000   0.000000   0.000000   0.454651  -0.031843  -0.029627
    29  H    0.000000   0.000000   0.000000  -0.031843   0.455297  -0.023895
    30  H    0.000000   0.000000   0.000000  -0.029627  -0.023895   0.468922
    31  H    0.000000   0.000000   0.000000   0.002251  -0.000075  -0.000265
    32  H    0.000000   0.000000  -0.000017  -0.000147  -0.000317   0.000109
    33  H    0.000000   0.000000   0.000001  -0.000547  -0.000002   0.003043
    34  H    0.000093  -0.000302  -0.005722   0.000003   0.000004  -0.000007
             31         32         33         34
     1  C    0.043733  -0.007246  -0.025988   0.097846
     2  C   -0.109044  -0.045098   0.167987   0.021218
     3  C   -0.016813   0.014633   0.000831   0.009843
     4  O    0.000008   0.000043   0.000000  -0.000362
     5  O   -0.000103  -0.000096   0.000028  -0.000029
     6  C   -0.000123  -0.000044   0.000024   0.000017
     7  C   -0.000213   0.000321  -0.000016   0.000124
     8  C    0.043047   0.043447  -0.219526   0.026957
     9  C   -0.007930  -0.027310   0.012891  -0.033975
    10  C   -0.001097  -0.005623   0.001379  -0.037273
    11  C   -0.000323   0.000779  -0.000306   0.001667
    12  C    0.000352  -0.001480   0.000093  -0.017638
    13  C    0.000810   0.011772  -0.001658   0.053291
    14  C    0.016069  -0.004028   0.002264   0.002377
    15  C    0.377980   0.359301   0.406459  -0.010729
    16  C    0.004844   0.013088  -0.000496   0.212862
    17  H    0.001511   0.000163  -0.000448  -0.000146
    18  H    0.000000   0.000000   0.000000   0.000000
    19  H    0.000000   0.000000   0.000000   0.000000
    20  H    0.000000   0.000000   0.000000   0.000000
    21  H    0.000000   0.000000   0.000000  -0.000001
    22  H    0.000000   0.000000   0.000000   0.000001
    23  H    0.005492  -0.005975  -0.005119  -0.001097
    24  H   -0.000001   0.000002   0.000000  -0.000314
    25  H    0.000000   0.000000   0.000000   0.000093
    26  H    0.000000   0.000000   0.000000  -0.000302
    27  H    0.000000  -0.000017   0.000001  -0.005722
    28  H    0.002251  -0.000147  -0.000547   0.000003
    29  H   -0.000075  -0.000317  -0.000002   0.000004
    30  H   -0.000265   0.000109   0.003043  -0.000007
    31  H    0.450076  -0.033120  -0.030508   0.000074
    32  H   -0.033120   0.466800  -0.023497   0.000577
    33  H   -0.030508  -0.023497   0.468682  -0.000053
    34  H    0.000074   0.000577  -0.000053   0.480474
 Mulliken atomic charges:
              1
     1  C    1.422174
     2  C   -0.116177
     3  C   -1.278829
     4  O   -0.226664
     5  O    0.007323
     6  C   -0.928161
     7  C   -0.140902
     8  C    0.197253
     9  C    1.027304
    10  C   -0.436886
    11  C   -0.360353
    12  C   -0.330556
    13  C   -0.497525
    14  C   -0.969841
    15  C   -0.959122
    16  C   -0.702502
    17  H    0.247462
    18  H    0.248084
    19  H    0.249237
    20  H    0.254271
    21  H    0.244908
    22  H    0.244403
    23  H    0.257372
    24  H    0.210027
    25  H    0.216917
    26  H    0.216592
    27  H    0.215166
    28  H    0.251635
    29  H    0.251435
    30  H    0.244913
    31  H    0.253374
    32  H    0.242962
    33  H    0.244483
    34  H    0.200222
 Sum of Mulliken charges=   0.00000
 Atomic charges with hydrogens summed into heavy atoms:
              1
     1  C    1.422174
     2  C    0.131285
     3  C   -1.278829
     4  O   -0.226664
     5  O    0.007323
     6  C   -0.176568
     7  C    0.348409
     8  C    0.454625
     9  C    1.027304
    10  C   -0.226860
    11  C   -0.143436
    12  C   -0.113964
    13  C   -0.282359
    14  C   -0.221857
    15  C   -0.218303
    16  C   -0.502280
    17  H    0.000000
    18  H    0.000000
    19  H    0.000000
    20  H    0.000000
    21  H    0.000000
    22  H    0.000000
    23  H    0.000000
    24  H    0.000000
    25  H    0.000000
    26  H    0.000000
    27  H    0.000000
    28  H    0.000000
    29  H    0.000000
    30  H    0.000000
    31  H    0.000000
    32  H    0.000000
    33  H    0.000000
    34  H    0.000000
 Sum of Mulliken charges=   0.00000
 APT atomic charges:
              1
     1  C   -0.177186
     2  C    0.082506
     3  C    1.311116
     4  O   -0.788408
     5  O   -0.990833
     6  C    0.045532
     7  C    0.596107
     8  C    0.053648
     9  C    0.040852
    10  C   -0.028671
    11  C   -0.017715
    12  C   -0.031894
    13  C   -0.020729
    14  C    0.059324
    15  C    0.068839
    16  C   -0.067083
    17  H    0.029133
    18  H   -0.005907
    19  H   -0.005204
    20  H   -0.015854
    21  H   -0.047987
    22  H   -0.049517
    23  H   -0.038610
    24  H    0.038077
    25  H    0.018695
    26  H    0.023191
    27  H    0.019323
    28  H   -0.018551
    29  H   -0.009161
    30  H   -0.038033
    31  H   -0.016667
    32  H   -0.012825
    33  H   -0.037605
    34  H    0.032100
 Sum of APT charges=   0.00000
 APT Atomic charges with hydrogens summed into heavy atoms:
              1
     1  C   -0.177186
     2  C    0.111639
     3  C    1.311116
     4  O   -0.788408
     5  O   -0.990833
     6  C    0.018566
     7  C    0.498602
     8  C    0.015038
     9  C    0.040852
    10  C    0.009406
    11  C    0.000980
    12  C   -0.008703
    13  C   -0.001407
    14  C   -0.006421
    15  C    0.001742
    16  C   -0.034983
    17  H    0.000000
    18  H    0.000000
    19  H    0.000000
    20  H    0.000000
    21  H    0.000000
    22  H    0.000000
    23  H    0.000000
    24  H    0.000000
    25  H    0.000000
    26  H    0.000000
    27  H    0.000000
    28  H    0.000000
    29  H    0.000000
    30  H    0.000000
    31  H    0.000000
    32  H    0.000000
    33  H    0.000000
    34  H    0.000000
 Sum of APT charges=   0.00000
 Electronic spatial extent (au):  <R**2>=  4522.8510
 Charge=     0.0000 electrons
 Dipole moment (field-independent basis, Debye):
    X=     0.7874    Y=     2.2954    Z=     0.1352  Tot=     2.4305
 Quadrupole moment (field-independent basis, Debye-Ang):
   XX=   -84.4915   YY=  -101.2691   ZZ=   -94.9349
   XY=    -0.1891   XZ=     0.7248   YZ=    -2.7308
 Traceless Quadrupole moment (field-independent basis, Debye-Ang):
   XX=     9.0736   YY=    -7.7040   ZZ=    -1.3697
   XY=    -0.1891   XZ=     0.7248   YZ=    -2.7308
 Octapole moment (field-independent basis, Debye-Ang**2):
  XXX=    44.8578  YYY=    21.2402  ZZZ=    -1.1417  XYY=     3.9041
  XXY=   -32.6239  XXZ=    -7.8418  XZZ=     3.5983  YZZ=    -8.4855
  YYZ=     8.1887  XYZ=     7.0542
 Hexadecapole moment (field-independent basis, Debye-Ang**3):
 XXXX= -3386.9462 YYYY= -2129.5974 ZZZZ=  -500.6197 XXXY=   -24.3582
 XXXZ=    24.0623 YYYX=   -25.5497 YYYZ=   -11.6980 ZZZX=     4.2671
 ZZZY=   -15.4318 XXYY=  -907.9989 XXZZ=  -678.7009 YYZZ=  -431.1971
 XXYZ=   -13.4321 YYXZ=   -24.2101 ZZXY=    -4.7592
 N-N= 1.067560435463D+03 E-N=-3.752724564524D+03  KE= 6.920294884819D+02
  Exact polarizability: 197.702  14.791 181.380   4.706  -9.704 140.117
 Approx polarizability: 262.358  26.572 266.747  10.377 -23.998 223.999
 Full mass-weighted force constant matrix:
 Low frequencies ---   -6.4692   -0.0010    0.0006    0.0014    1.9655    8.8990
 Low frequencies ---   25.6667   33.5854   48.0733
 Diagonal vibrational polarizability:
       25.2894687      14.3664170      46.8486140
 Harmonic frequencies (cm**-1), IR intensities (KM/Mole), Raman scattering
 activities (A**4/AMU), depolarization ratios for plane and unpolarized
 incident light, reduced masses (AMU), force constants (mDyne/A),
 and normal coordinates:
                     1                      2                      3
                     A                      A                      A
 Frequencies --    25.5431                33.5778                48.0640
 Red. masses --     3.9246                 3.5376                 2.8915
 Frc consts  --     0.0015                 0.0023                 0.0039
 IR Inten    --     0.7904                 0.1558                 0.0247
 Atom AN      X      Y      Z        X      Y      Z        X      Y      Z
   1   6     0.00   0.00   0.05    -0.01  -0.01   0.03     0.01   0.01   0.05
   2   6     0.00   0.00   0.05     0.00  -0.01   0.02     0.01   0.00   0.08
   3   6     0.01   0.00   0.10     0.00   0.00   0.07     0.00   0.00   0.00
   4   8     0.01   0.00   0.27     0.01  -0.01   0.15    -0.01   0.00  -0.05
   5   8     0.00   0.00  -0.06    -0.01   0.00   0.00     0.01  -0.01   0.02
   6   6    -0.01   0.00  -0.28    -0.01   0.02  -0.07     0.01  -0.02  -0.01
   7   6     0.00   0.00  -0.01     0.00   0.01   0.04     0.00  -0.01  -0.04
   8   6    -0.01   0.00   0.03     0.01   0.01   0.01    -0.01  -0.01   0.11
   9   6     0.00   0.00   0.01    -0.01  -0.01   0.01     0.01   0.01   0.02
  10   6    -0.06   0.06   0.02     0.03  -0.17  -0.10    -0.05   0.07   0.04
  11   6    -0.06   0.06  -0.03     0.03  -0.17  -0.13    -0.05   0.07   0.00
  12   6     0.01   0.00  -0.09    -0.01  -0.01  -0.06     0.01   0.01  -0.07
  13   6     0.07  -0.05  -0.10    -0.05   0.15   0.05     0.07  -0.06  -0.09
  14   6    -0.08  -0.03   0.06     0.12   0.09  -0.06     0.15   0.12   0.00
  15   6     0.06   0.02   0.05    -0.07  -0.07  -0.06    -0.21  -0.12   0.00
  16   6     0.07  -0.05  -0.05    -0.05   0.15   0.08     0.07  -0.05  -0.04
  17   1     0.00   0.00   0.08     0.00  -0.02   0.02     0.00   0.01   0.08
  18   1     0.08   0.15  -0.40     0.01   0.10  -0.13     0.02  -0.07   0.02
  19   1    -0.10  -0.16  -0.39    -0.05  -0.05  -0.12     0.00   0.02   0.02
  20   1    -0.01  -0.01  -0.26     0.00   0.03  -0.04     0.00  -0.03  -0.06
  21   1    -0.08  -0.15   0.11    -0.02  -0.06   0.10    -0.02   0.03  -0.07
  22   1     0.09   0.15   0.10     0.04   0.09   0.10     0.00  -0.06  -0.07
  23   1    -0.01  -0.01  -0.04     0.01   0.02   0.12     0.01  -0.05   0.28
  24   1    -0.10   0.10   0.07     0.05  -0.30  -0.16    -0.09   0.12   0.09
  25   1    -0.10   0.10  -0.02     0.06  -0.29  -0.21    -0.09   0.12   0.02
  26   1     0.01   0.00  -0.13    -0.01  -0.01  -0.08     0.01   0.00  -0.10
  27   1     0.11  -0.09  -0.15    -0.07   0.28   0.10     0.12  -0.10  -0.14
  28   1    -0.09  -0.03   0.12     0.12   0.09  -0.17     0.13   0.17  -0.19
  29   1    -0.13  -0.05   0.04     0.19   0.15   0.00     0.31   0.20   0.08
  30   1    -0.09  -0.03   0.04     0.13   0.10  -0.06     0.12   0.10   0.02
  31   1     0.06   0.03   0.12    -0.07  -0.09  -0.16    -0.23  -0.11  -0.19
  32   1     0.11   0.04   0.03    -0.15  -0.13  -0.01    -0.35  -0.21   0.09
  33   1     0.04   0.02   0.03    -0.05  -0.06  -0.06    -0.22  -0.13   0.03
  34   1     0.11  -0.09  -0.06    -0.08   0.27   0.15     0.11  -0.10  -0.06
                     4                      5                      6
                     A                      A                      A
 Frequencies --    67.5608                74.5557                83.3433
 Red. masses --     4.5401                 4.4613                 2.3461
 Frc consts  --     0.0122                 0.0146                 0.0096
 IR Inten    --     0.3936                 0.3741                 1.0705
 Atom AN      X      Y      Z        X      Y      Z        X      Y      Z
   1   6     0.03  -0.08  -0.08     0.02  -0.05   0.05     0.01   0.03  -0.08
   2   6     0.00  -0.08  -0.06     0.00  -0.05   0.06     0.00   0.03  -0.08
   3   6     0.06  -0.05  -0.03     0.04  -0.03   0.02     0.00   0.02  -0.04
   4   8     0.10  -0.06   0.13     0.05  -0.04  -0.22    -0.01   0.03  -0.03
   5   8     0.03  -0.01  -0.16     0.03  -0.01   0.25     0.02   0.00   0.02
   6   6     0.04   0.13   0.11     0.02   0.07  -0.19     0.02  -0.10  -0.05
   7   6     0.08   0.05   0.00     0.06   0.03   0.10    -0.01  -0.04   0.20
   8   6    -0.03  -0.11   0.01    -0.03  -0.07  -0.02    -0.02   0.01   0.00
   9   6     0.02  -0.06  -0.06     0.02  -0.04   0.01     0.01   0.02  -0.05
  10   6    -0.02   0.00  -0.03    -0.02  -0.03   0.00     0.05   0.03  -0.03
  11   6    -0.07   0.14   0.03    -0.06   0.06   0.01     0.06   0.01   0.01
  12   6    -0.09   0.21   0.06    -0.05   0.14   0.02     0.03  -0.01   0.03
  13   6    -0.04   0.13   0.02     0.00   0.11   0.02    -0.01  -0.02   0.01
  14   6     0.01  -0.15   0.02    -0.13  -0.01  -0.03     0.03  -0.05   0.03
  15   6    -0.14  -0.07   0.03     0.02  -0.11  -0.05    -0.13   0.07   0.04
  16   6     0.01   0.00  -0.04     0.03   0.02   0.01    -0.02   0.00  -0.03
  17   1    -0.01  -0.05  -0.07    -0.01  -0.03   0.11    -0.01   0.05  -0.10
  18   1    -0.10   0.17   0.10     0.16   0.14  -0.25     0.06   0.14  -0.23
  19   1     0.10   0.10   0.09    -0.17   0.01  -0.24     0.03  -0.35  -0.22
  20   1     0.09   0.18   0.23     0.04   0.10  -0.30    -0.01  -0.14   0.12
  21   1     0.22   0.02   0.01    -0.08  -0.03   0.16    -0.06  -0.26   0.37
  22   1     0.02   0.08   0.02     0.24   0.08   0.15     0.00   0.18   0.37
  23   1    -0.02  -0.15   0.05    -0.02  -0.09  -0.07    -0.01  -0.02   0.05
  24   1    -0.01  -0.05  -0.05    -0.03  -0.08  -0.01     0.08   0.04  -0.05
  25   1    -0.11   0.20   0.05    -0.09   0.08   0.01     0.09   0.01   0.03
  26   1    -0.13   0.33   0.11    -0.08   0.22   0.04     0.03  -0.03   0.06
  27   1    -0.05   0.19   0.04     0.00   0.17   0.03    -0.04  -0.03   0.02
  28   1    -0.01  -0.11  -0.02    -0.14   0.02   0.02     0.02  -0.02  -0.01
  29   1     0.08  -0.19   0.00    -0.17   0.02  -0.02     0.10  -0.10   0.00
  30   1    -0.02  -0.18   0.09    -0.16  -0.02  -0.11     0.01  -0.08   0.11
  31   1    -0.15  -0.03  -0.02     0.01  -0.08   0.00    -0.15   0.11   0.00
  32   1    -0.18  -0.05   0.03     0.10  -0.16  -0.04    -0.18   0.12   0.03
  33   1    -0.16  -0.09   0.10    -0.01  -0.13  -0.13    -0.15   0.05   0.14
  34   1     0.04  -0.05  -0.06     0.06   0.00   0.02    -0.05   0.00  -0.05
                     7                      8                      9
                     A                      A                      A
 Frequencies --    89.5375               129.6045               178.4851
 Red. masses --     3.1804                 2.7013                 3.6299
 Frc consts  --     0.0150                 0.0267                 0.0681
 IR Inten    --     0.5620                 1.8892                 0.3407
 Atom AN      X      Y      Z        X      Y      Z        X      Y      Z
   1   6    -0.05  -0.04  -0.03     0.00   0.00  -0.01     0.03   0.00   0.12
   2   6     0.00  -0.05  -0.03    -0.01   0.01  -0.15     0.04   0.00  -0.09
   3   6    -0.04  -0.03  -0.02     0.01   0.00   0.09    -0.02  -0.05  -0.02
   4   8    -0.01  -0.04  -0.04     0.00   0.00   0.07    -0.06  -0.04  -0.09
   5   8    -0.06   0.01   0.03     0.01   0.00   0.20    -0.02  -0.06  -0.10
   6   6    -0.07   0.21  -0.03     0.00   0.00  -0.03    -0.05   0.07   0.02
   7   6     0.01   0.09   0.10     0.00   0.00  -0.09     0.01  -0.02   0.02
   8   6     0.09   0.02   0.01    -0.01   0.00  -0.08     0.01  -0.02  -0.08
   9   6    -0.05  -0.02  -0.01     0.00   0.00   0.01     0.01   0.05   0.20
  10   6    -0.06   0.01   0.01    -0.01   0.00   0.01    -0.06   0.03   0.14
  11   6    -0.06   0.00   0.01    -0.01   0.00  -0.01    -0.04  -0.03  -0.02
  12   6    -0.04  -0.05  -0.01     0.00   0.01  -0.02     0.06  -0.03  -0.10
  13   6    -0.04  -0.08  -0.03     0.01   0.01  -0.01     0.12   0.06  -0.01
  14   6     0.23  -0.03   0.01     0.08  -0.13  -0.02    -0.03  -0.09  -0.03
  15   6     0.13   0.02   0.02    -0.10   0.12   0.01    -0.06   0.04  -0.03
  16   6    -0.04  -0.06  -0.03     0.01   0.00   0.01     0.09   0.10   0.15
  17   1     0.01  -0.10  -0.06    -0.01   0.02  -0.22     0.04   0.02  -0.25
  18   1    -0.12   0.33  -0.11     0.14  -0.26   0.14    -0.22   0.26  -0.10
  19   1    -0.15   0.10  -0.11    -0.13   0.26   0.15     0.01  -0.10  -0.11
  20   1     0.00   0.29   0.04    -0.01   0.00  -0.36     0.02   0.15   0.26
  21   1     0.04  -0.01   0.17    -0.09   0.19  -0.22     0.09  -0.11   0.08
  22   1     0.09   0.19   0.17     0.07  -0.19  -0.22     0.01   0.06   0.09
  23   1     0.06   0.10   0.05     0.00   0.00  -0.04     0.03  -0.06  -0.08
  24   1    -0.07   0.04   0.03    -0.02  -0.01   0.01    -0.13   0.01   0.19
  25   1    -0.06   0.02   0.03    -0.02   0.00  -0.02    -0.10  -0.08  -0.09
  26   1    -0.04  -0.06  -0.01     0.00   0.01  -0.03     0.09  -0.10  -0.24
  27   1    -0.03  -0.12  -0.04     0.03   0.01  -0.02     0.19   0.08  -0.06
  28   1     0.28  -0.13  -0.05     0.08  -0.13  -0.05    -0.04  -0.05   0.00
  29   1     0.23  -0.03   0.01     0.14  -0.22  -0.08    -0.01  -0.15  -0.08
  30   1     0.32   0.04   0.07     0.09  -0.14   0.12    -0.06  -0.12   0.02
  31   1     0.17  -0.09  -0.02    -0.10   0.12  -0.04    -0.11   0.16   0.01
  32   1     0.02   0.07   0.03    -0.18   0.22  -0.03     0.01   0.06  -0.06
  33   1     0.23   0.10   0.08    -0.08   0.11   0.15    -0.16  -0.04  -0.01
  34   1    -0.04  -0.09  -0.04     0.03   0.00   0.01     0.16   0.14   0.21
                    10                     11                     12
                     A                      A                      A
 Frequencies --   188.8884               221.3403               248.3860
 Red. masses --     3.7955                 1.0530                 3.3008
 Frc consts  --     0.0798                 0.0304                 0.1200
 IR Inten    --     2.4441                 0.1328                 1.1639
 Atom AN      X      Y      Z        X      Y      Z        X      Y      Z
   1   6    -0.04  -0.02   0.07     0.00   0.00   0.00    -0.01   0.00  -0.04
   2   6    -0.10   0.00  -0.04     0.00   0.00  -0.01     0.05  -0.02   0.00
   3   6     0.06   0.09  -0.01     0.00   0.00   0.00     0.02   0.02  -0.02
   4   8     0.15   0.07  -0.06     0.01   0.00   0.00     0.08   0.02   0.01
   5   8     0.05   0.14  -0.05     0.00   0.01   0.00     0.02   0.07   0.00
   6   6     0.13  -0.15   0.00     0.01  -0.01   0.00     0.08  -0.04   0.00
   7   6     0.00   0.05   0.00     0.00   0.01   0.00     0.02   0.05   0.03
   8   6    -0.05   0.04  -0.03     0.01   0.00   0.01     0.04  -0.07   0.01
   9   6    -0.03  -0.10   0.10    -0.01   0.00   0.00    -0.07   0.12   0.00
  10   6    -0.12  -0.10   0.06    -0.01   0.00   0.00    -0.08   0.17   0.03
  11   6    -0.15  -0.04  -0.01    -0.01   0.00   0.00    -0.02   0.02   0.00
  12   6    -0.10   0.02  -0.03    -0.01   0.00   0.00     0.00  -0.14  -0.06
  13   6    -0.01  -0.01  -0.01    -0.01  -0.01   0.00    -0.08   0.00   0.01
  14   6     0.05  -0.01  -0.02     0.04   0.00   0.00     0.00  -0.12   0.04
  15   6     0.04   0.06  -0.01    -0.02   0.01   0.01     0.03  -0.15  -0.04
  16   6     0.01  -0.07   0.06    -0.01  -0.01   0.00    -0.13   0.14   0.04
  17   1    -0.10   0.00  -0.13     0.00  -0.01  -0.01     0.05  -0.03   0.01
  18   1     0.19  -0.07  -0.06     0.03  -0.02   0.01     0.27  -0.19   0.08
  19   1     0.33  -0.26  -0.07     0.01   0.00   0.01     0.03   0.09   0.09
  20   1     0.01  -0.32   0.15     0.00  -0.02  -0.02     0.00  -0.13  -0.23
  21   1    -0.05   0.02   0.04     0.00   0.01   0.00     0.00   0.03   0.05
  22   1    -0.09   0.09   0.03     0.00   0.00   0.00     0.00   0.07   0.04
  23   1    -0.07   0.11  -0.02     0.01   0.00   0.02     0.05  -0.11   0.01
  24   1    -0.17  -0.15   0.09    -0.01  -0.01   0.00    -0.08   0.25   0.06
  25   1    -0.21  -0.03  -0.03    -0.01   0.00   0.00     0.03  -0.01   0.00
  26   1    -0.12   0.07  -0.07    -0.01   0.00   0.00     0.07  -0.32  -0.13
  27   1     0.05   0.03  -0.04    -0.01  -0.01   0.00    -0.09  -0.03   0.01
  28   1     0.11  -0.14  -0.03     0.13  -0.22   0.07    -0.05   0.02   0.02
  29   1    -0.02   0.00  -0.03    -0.18   0.07   0.01     0.14  -0.21  -0.01
  30   1     0.16   0.08  -0.01     0.22   0.16  -0.11    -0.11  -0.23   0.14
  31   1     0.10  -0.12  -0.05    -0.17   0.42   0.29     0.02  -0.13  -0.06
  32   1    -0.11   0.13  -0.01     0.46  -0.11  -0.04     0.06  -0.25   0.00
  33   1     0.19   0.17   0.07    -0.40  -0.27  -0.22     0.00  -0.16  -0.14
  34   1     0.07  -0.08   0.08    -0.01  -0.01   0.00    -0.20   0.20   0.05
                    13                     14                     15
                     A                      A                      A
 Frequencies --   250.6355               263.1013               280.3412
 Red. masses --     1.1448                 1.2910                 3.3186
 Frc consts  --     0.0424                 0.0527                 0.1537
 IR Inten    --     0.0960                 0.4646                 1.2546
 Atom AN      X      Y      Z        X      Y      Z        X      Y      Z
   1   6     0.00  -0.01   0.00     0.00   0.00   0.00     0.02  -0.02  -0.03
   2   6     0.02   0.00   0.00     0.01   0.00   0.01     0.01   0.00   0.00
   3   6     0.01  -0.01   0.00     0.00   0.01   0.04     0.05  -0.09   0.00
   4   8     0.01  -0.01   0.00     0.01   0.01   0.01     0.01  -0.08   0.01
   5   8     0.01  -0.01   0.00     0.00   0.01   0.09     0.09  -0.13   0.02
   6   6     0.01   0.00   0.00     0.00  -0.01   0.00     0.13   0.04  -0.01
   7   6     0.01   0.00   0.00    -0.01   0.01  -0.09     0.18  -0.06  -0.02
   8   6     0.03   0.01   0.00     0.01  -0.01   0.00     0.01   0.04   0.01
   9   6    -0.01  -0.02   0.00    -0.01   0.02  -0.02    -0.04   0.03  -0.02
  10   6    -0.02  -0.02   0.00     0.00   0.02  -0.01    -0.08   0.06   0.00
  11   6    -0.03  -0.01   0.00     0.01   0.01   0.00    -0.06   0.00   0.00
  12   6    -0.03   0.00   0.00     0.00  -0.01   0.00    -0.06  -0.09  -0.03
  13   6    -0.02  -0.01   0.00    -0.02   0.00   0.00    -0.09  -0.02   0.01
  14   6     0.00   0.05  -0.02     0.01  -0.03   0.01    -0.06   0.14  -0.03
  15   6     0.02   0.05   0.02     0.00  -0.03  -0.01    -0.05   0.13   0.06
  16   6    -0.01  -0.02   0.00    -0.02   0.01  -0.01    -0.10   0.04   0.02
  17   1     0.02  -0.02   0.00     0.01   0.00   0.03     0.02  -0.01   0.02
  18   1     0.00   0.02  -0.01    -0.31   0.33  -0.22     0.05   0.09  -0.03
  19   1     0.03  -0.02  -0.01     0.32  -0.35  -0.24     0.12   0.01  -0.03
  20   1     0.02   0.00   0.03     0.01  -0.02   0.57     0.19   0.11   0.06
  21   1     0.02   0.00  -0.01    -0.05   0.13  -0.18     0.22  -0.04  -0.04
  22   1     0.02  -0.01  -0.01     0.01  -0.11  -0.18     0.24  -0.09  -0.03
  23   1     0.03   0.00  -0.01     0.01  -0.02   0.00     0.01   0.04   0.00
  24   1    -0.03  -0.03   0.00     0.01   0.04  -0.02    -0.09   0.09   0.03
  25   1    -0.03  -0.01   0.00     0.03   0.01   0.01    -0.03   0.00   0.01
  26   1    -0.04   0.01   0.01     0.01  -0.03   0.01    -0.03  -0.17  -0.06
  27   1    -0.01  -0.01   0.00    -0.03  -0.01   0.01    -0.09  -0.03   0.01
  28   1    -0.17   0.50  -0.25     0.01  -0.03   0.01    -0.01   0.00   0.07
  29   1     0.49  -0.05  -0.01     0.02  -0.05  -0.01    -0.29   0.28   0.04
  30   1    -0.35  -0.27   0.18     0.01  -0.03   0.03     0.05   0.26  -0.26
  31   1    -0.04   0.23   0.17     0.00  -0.02  -0.01    -0.03   0.06  -0.03
  32   1     0.24   0.04  -0.02     0.01  -0.05   0.00    -0.22   0.25   0.03
  33   1    -0.14  -0.07  -0.05    -0.01  -0.03  -0.03     0.03   0.17   0.25
  34   1    -0.01  -0.03   0.00    -0.04   0.02  -0.02    -0.15   0.06   0.02
                    16                     17                     18
                     A                      A                      A
 Frequencies --   347.4889               374.8003               404.3989
 Red. masses --     4.6185                 3.0655                 3.1458
 Frc consts  --     0.3286                 0.2537                 0.3031
 IR Inten    --    10.6338                 2.3690                 3.2453
 Atom AN      X      Y      Z        X      Y      Z        X      Y      Z
   1   6     0.00  -0.10  -0.04     0.04   0.04   0.05    -0.03  -0.04   0.03
   2   6     0.00  -0.09  -0.01     0.23   0.02   0.01     0.08  -0.07   0.02
   3   6     0.02  -0.08  -0.01     0.01   0.03   0.02    -0.10  -0.07   0.02
   4   8     0.30  -0.13  -0.01     0.06   0.02  -0.01    -0.13  -0.07   0.00
   5   8    -0.08   0.07   0.01     0.00   0.04  -0.01    -0.13   0.06   0.00
   6   6    -0.19  -0.05   0.01    -0.08   0.00   0.00     0.17  -0.02  -0.01
   7   6    -0.18   0.00   0.00    -0.06  -0.01   0.00    -0.02   0.21   0.00
   8   6     0.00  -0.06   0.00     0.24   0.02  -0.02     0.07  -0.09  -0.02
   9   6     0.00   0.00  -0.02    -0.01   0.03   0.02    -0.02   0.02   0.00
  10   6     0.02   0.07   0.03    -0.03  -0.06  -0.04     0.02   0.01   0.00
  11   6     0.04   0.04   0.02    -0.05  -0.04  -0.02     0.04  -0.02   0.00
  12   6     0.08  -0.03  -0.03    -0.10   0.02   0.03     0.03   0.03   0.02
  13   6     0.02   0.04   0.00    -0.04  -0.06   0.00     0.02   0.01   0.00
  14   6    -0.03   0.10  -0.09    -0.05   0.00   0.05    -0.02   0.01  -0.08
  15   6    -0.01   0.08   0.11    -0.07   0.03  -0.06    -0.02   0.03   0.07
  16   6     0.00   0.08   0.01    -0.03  -0.07  -0.01     0.02  -0.01  -0.03
  17   1    -0.01  -0.08   0.01     0.26  -0.10   0.02     0.09  -0.12   0.06
  18   1    -0.20  -0.04   0.00    -0.10   0.00   0.01     0.42  -0.06   0.00
  19   1    -0.19  -0.05   0.00    -0.11   0.00   0.01     0.41  -0.05  -0.02
  20   1    -0.19  -0.04   0.02    -0.05   0.03   0.00    -0.07  -0.34   0.00
  21   1    -0.23   0.01   0.00    -0.07  -0.02   0.01     0.01   0.19   0.01
  22   1    -0.22  -0.01  -0.01    -0.08   0.00   0.01     0.00   0.20   0.00
  23   1    -0.01  -0.05   0.00     0.29  -0.12  -0.04     0.09  -0.13  -0.03
  24   1     0.03   0.14   0.04    -0.04  -0.12  -0.06     0.04   0.02  -0.01
  25   1     0.03   0.06   0.03    -0.02  -0.06  -0.03     0.04  -0.04  -0.02
  26   1     0.11  -0.12  -0.07    -0.13   0.09   0.07     0.03   0.05   0.03
  27   1     0.00   0.04   0.02    -0.01  -0.08  -0.03     0.00   0.00   0.01
  28   1    -0.03   0.10  -0.15    -0.08   0.04   0.36    -0.02   0.03  -0.06
  29   1    -0.06   0.28   0.03    -0.28  -0.05  -0.02    -0.08   0.12  -0.01
  30   1    -0.01   0.13  -0.29    -0.12  -0.04  -0.09    -0.03   0.02  -0.24
  31   1     0.00   0.08   0.17    -0.13   0.14  -0.35    -0.04   0.07   0.05
  32   1    -0.04   0.27   0.02    -0.28  -0.01   0.02    -0.09   0.17   0.00
  33   1     0.02   0.08   0.29    -0.14  -0.05   0.12    -0.03   0.00   0.27
  34   1     0.00   0.11   0.03    -0.04  -0.11  -0.05     0.05  -0.04  -0.04
                    19                     20                     21
                     A                      A                      A
 Frequencies --   412.9000               415.3685               450.9637
 Red. masses --     2.9219                 3.4557                 3.3267
 Frc consts  --     0.2935                 0.3513                 0.3986
 IR Inten    --     0.2591                 0.9129                 0.4387
 Atom AN      X      Y      Z        X      Y      Z        X      Y      Z
   1   6     0.00   0.00   0.03    -0.01   0.00   0.21    -0.05  -0.02  -0.03
   2   6     0.00   0.01   0.04    -0.04   0.00   0.24    -0.08   0.02  -0.05
   3   6     0.01   0.00   0.01     0.01  -0.03   0.11    -0.04  -0.13  -0.02
   4   8     0.01   0.00  -0.01     0.05  -0.04  -0.06     0.09  -0.16   0.00
   5   8     0.01   0.00  -0.01    -0.01  -0.02  -0.07    -0.09  -0.03   0.01
   6   6    -0.01   0.00   0.00     0.01   0.00   0.00     0.06  -0.01   0.00
   7   6     0.00  -0.02   0.00     0.01  -0.01   0.01    -0.01   0.07   0.00
   8   6    -0.01   0.01  -0.02    -0.05   0.04  -0.11     0.03   0.20   0.04
   9   6     0.00   0.00  -0.01    -0.02   0.04  -0.06    -0.02   0.00   0.01
  10   6    -0.07   0.17   0.09     0.03   0.01  -0.07     0.02   0.00   0.02
  11   6     0.07  -0.17  -0.10     0.03   0.04   0.02     0.03  -0.01   0.01
  12   6    -0.01   0.00   0.01     0.01   0.00   0.03     0.04   0.02   0.00
  13   6    -0.07   0.16   0.10    -0.02  -0.04  -0.02     0.02   0.02  -0.01
  14   6     0.01  -0.02  -0.01     0.06  -0.12  -0.06    -0.02   0.06   0.19
  15   6    -0.01   0.02  -0.01    -0.05   0.11  -0.09    -0.02   0.03  -0.15
  16   6     0.06  -0.17  -0.11    -0.04   0.05  -0.05     0.02   0.00  -0.02
  17   1     0.00   0.01   0.09    -0.04   0.00   0.58    -0.07  -0.02  -0.13
  18   1    -0.03   0.00   0.00     0.02  -0.02   0.01     0.16  -0.03   0.00
  19   1    -0.04   0.01   0.00    -0.01   0.02   0.02     0.17  -0.03  -0.01
  20   1     0.01   0.03   0.00     0.01   0.01  -0.02    -0.04  -0.14   0.00
  21   1     0.00  -0.02   0.00     0.05  -0.07   0.04     0.02   0.07   0.00
  22   1     0.00  -0.01   0.01    -0.01   0.04   0.04     0.02   0.05  -0.01
  23   1    -0.01   0.00  -0.03    -0.06   0.08  -0.15    -0.01   0.28   0.05
  24   1    -0.14   0.38   0.21     0.08   0.02  -0.11     0.03   0.02   0.02
  25   1     0.15  -0.36  -0.21     0.06   0.08   0.06     0.01  -0.02  -0.01
  26   1    -0.01   0.02   0.02     0.01  -0.01   0.06     0.04   0.03   0.00
  27   1    -0.16   0.36   0.21    -0.04  -0.10  -0.01     0.01   0.01   0.00
  28   1     0.02  -0.03  -0.03     0.09  -0.19  -0.12    -0.04   0.11   0.37
  29   1     0.03  -0.03  -0.02     0.14  -0.26  -0.16    -0.05  -0.15   0.04
  30   1     0.03  -0.01   0.03     0.12  -0.09   0.18    -0.09  -0.02   0.34
  31   1    -0.01   0.02  -0.01    -0.07   0.16  -0.09    -0.05   0.07  -0.31
  32   1    -0.01   0.02  -0.02    -0.06   0.17  -0.12    -0.02  -0.24   0.00
  33   1    -0.01   0.01   0.00    -0.08   0.07  -0.01    -0.08   0.00  -0.37
  34   1     0.13  -0.37  -0.22    -0.10   0.09  -0.04     0.06  -0.02  -0.01
                    22                     23                     24
                     A                      A                      A
 Frequencies --   498.0669               583.9647               600.6405
 Red. masses --     3.4192                 3.8648                 4.6831
 Frc consts  --     0.4997                 0.7765                 0.9954
 IR Inten    --     3.5211                 4.0706                10.6772
 Atom AN      X      Y      Z        X      Y      Z        X      Y      Z
   1   6    -0.01   0.06   0.10     0.01  -0.01   0.31     0.22   0.11  -0.04
   2   6     0.00   0.06  -0.09     0.00   0.01  -0.21     0.10   0.17   0.02
   3   6    -0.01  -0.04   0.03     0.01   0.00   0.18     0.02  -0.10  -0.02
   4   8     0.09  -0.06  -0.01    -0.01   0.01  -0.06     0.00  -0.11   0.00
   5   8    -0.01  -0.03  -0.01     0.00   0.00  -0.06    -0.07  -0.02   0.01
   6   6     0.01   0.00   0.00     0.00   0.00   0.00    -0.02   0.00   0.00
   7   6     0.02  -0.02   0.00     0.00   0.00   0.00    -0.08   0.11   0.00
   8   6    -0.09  -0.04   0.03     0.01  -0.01   0.03    -0.14   0.02   0.01
   9   6    -0.09   0.25   0.11     0.04  -0.07  -0.12     0.21   0.02  -0.01
  10   6     0.01   0.02  -0.05    -0.01   0.01  -0.12    -0.01   0.02  -0.10
  11   6     0.05  -0.08  -0.07    -0.01   0.05   0.05    -0.07   0.07  -0.08
  12   6    -0.07   0.14   0.10     0.03  -0.10  -0.01    -0.18  -0.12  -0.04
  13   6     0.01  -0.11  -0.06    -0.03   0.04   0.06    -0.01  -0.03   0.12
  14   6     0.00   0.00  -0.02    -0.01   0.04   0.05     0.00  -0.01  -0.01
  15   6     0.02  -0.06   0.06     0.01  -0.05   0.05     0.00  -0.01   0.00
  16   6    -0.03   0.00  -0.04     0.01   0.01  -0.11     0.04  -0.09   0.12
  17   1    -0.03   0.15  -0.32    -0.01   0.03  -0.60     0.05   0.40   0.08
  18   1     0.01   0.00   0.00     0.00  -0.01   0.01     0.10  -0.02   0.00
  19   1     0.01   0.00   0.00     0.00   0.01   0.01     0.10  -0.03  -0.01
  20   1     0.02   0.01   0.00     0.00   0.00  -0.01    -0.14  -0.16   0.01
  21   1     0.04  -0.03   0.01     0.02  -0.05   0.04    -0.06   0.09   0.01
  22   1     0.03  -0.01   0.01    -0.03   0.06   0.04    -0.05   0.08  -0.01
  23   1    -0.08  -0.06   0.05     0.02  -0.02   0.10    -0.10  -0.09  -0.01
  24   1     0.10  -0.16  -0.17    -0.03   0.20  -0.05    -0.17  -0.02   0.02
  25   1     0.17  -0.30  -0.18     0.00   0.24   0.19     0.03   0.18   0.04
  26   1    -0.10   0.23   0.18     0.02  -0.08   0.00    -0.18  -0.10  -0.04
  27   1     0.08  -0.34  -0.18    -0.16   0.18   0.19     0.09   0.17   0.10
  28   1     0.02  -0.04  -0.14    -0.03   0.10   0.09     0.06  -0.15  -0.19
  29   1     0.05   0.07   0.04    -0.05   0.10   0.08     0.10  -0.03  -0.01
  30   1     0.05   0.04  -0.04    -0.06   0.02  -0.07     0.14   0.07   0.14
  31   1     0.08  -0.16   0.19     0.03  -0.10   0.06     0.07  -0.16   0.15
  32   1     0.10  -0.04   0.04     0.05  -0.11   0.07     0.10  -0.02  -0.01
  33   1     0.10   0.01  -0.03     0.04  -0.02  -0.05     0.12   0.10  -0.14
  34   1     0.02  -0.18  -0.15    -0.12   0.14  -0.07    -0.13  -0.04   0.08
                    25                     26                     27
                     A                      A                      A
 Frequencies --   636.4968               705.8463               715.4771
 Red. masses --     6.3494                 2.8347                 1.8034
 Frc consts  --     1.5156                 0.8321                 0.5439
 IR Inten    --     0.3550                14.0053                54.1551
 Atom AN      X      Y      Z        X      Y      Z        X      Y      Z
   1   6    -0.01   0.01   0.09    -0.04   0.08  -0.01     0.04  -0.10   0.01
   2   6     0.00   0.01  -0.03     0.05   0.07   0.02    -0.07  -0.09  -0.02
   3   6     0.00   0.00   0.07    -0.05   0.01  -0.03     0.05  -0.01   0.05
   4   8     0.00   0.00  -0.02     0.06  -0.01   0.01    -0.06   0.01  -0.01
   5   8     0.00  -0.01  -0.02    -0.03  -0.04   0.01     0.04   0.05  -0.01
   6   6     0.00   0.00   0.00     0.02   0.01   0.00    -0.02  -0.01   0.00
   7   6     0.00   0.00   0.00     0.02  -0.02   0.00    -0.01   0.02   0.00
   8   6     0.01   0.00   0.00    -0.01   0.00   0.00     0.01   0.00   0.00
   9   6     0.02  -0.07   0.11    -0.09   0.09   0.06     0.05   0.02   0.00
  10   6     0.26  -0.02   0.16     0.02  -0.12  -0.01     0.00   0.06  -0.04
  11   6     0.20   0.21  -0.19    -0.07   0.10   0.13     0.00   0.08  -0.03
  12   6    -0.01   0.04  -0.14     0.09  -0.08  -0.06    -0.07   0.01   0.02
  13   6    -0.29   0.04  -0.21    -0.06   0.16   0.05     0.00   0.02   0.07
  14   6     0.00   0.00   0.00     0.00  -0.02  -0.03     0.01   0.02   0.04
  15   6     0.00  -0.01   0.01     0.00  -0.02   0.02     0.00   0.02  -0.02
  16   6    -0.18  -0.19   0.15     0.03  -0.09  -0.09     0.01   0.01   0.05
  17   1     0.00   0.00  -0.10     0.05   0.07   0.02    -0.07  -0.09   0.01
  18   1     0.00   0.00   0.00     0.03   0.01   0.00    -0.04  -0.01   0.00
  19   1     0.01   0.00   0.00     0.02   0.00   0.00    -0.03   0.00   0.01
  20   1     0.00   0.00   0.00     0.02   0.01   0.00    -0.02   0.00   0.00
  21   1     0.01  -0.02   0.01     0.03  -0.01  -0.01    -0.04   0.00   0.01
  22   1     0.00   0.02   0.01     0.04  -0.03  -0.01    -0.04   0.03   0.01
  23   1     0.01  -0.02   0.01     0.02  -0.08  -0.02    -0.03   0.10   0.00
  24   1     0.13  -0.05   0.25     0.17  -0.42  -0.22     0.09  -0.28  -0.21
  25   1     0.03   0.27  -0.23    -0.07  -0.06   0.01     0.23  -0.30  -0.22
  26   1     0.05  -0.14   0.25     0.23  -0.42  -0.28     0.10  -0.43  -0.21
  27   1    -0.20   0.18  -0.23    -0.05  -0.03  -0.01     0.20  -0.33  -0.18
  28   1     0.00   0.02   0.01     0.01  -0.05  -0.07    -0.01   0.06   0.08
  29   1    -0.01   0.02   0.01     0.02  -0.02  -0.03    -0.02   0.03   0.04
  30   1    -0.01   0.00  -0.02     0.03   0.00   0.00    -0.04  -0.01  -0.01
  31   1     0.00  -0.02   0.01     0.01  -0.05   0.05    -0.02   0.06  -0.06
  32   1     0.00  -0.02   0.02     0.01  -0.02   0.02    -0.02   0.01  -0.02
  33   1     0.01  -0.01   0.00     0.02   0.00   0.00    -0.03  -0.01   0.00
  34   1    -0.06  -0.14   0.23     0.19  -0.37  -0.23     0.09  -0.32  -0.15
                    28                     29                     30
                     A                      A                      A
 Frequencies --   772.4685               789.3501               806.2386
 Red. masses --     3.5110                 4.5256                 3.1999
 Frc consts  --     1.2344                 1.6614                 1.2255
 IR Inten    --     6.2690                16.2681                 8.8978
 Atom AN      X      Y      Z        X      Y      Z        X      Y      Z
   1   6     0.08   0.06  -0.10    -0.14   0.06  -0.20     0.09  -0.08  -0.10
   2   6     0.11   0.10  -0.05    -0.09   0.00  -0.06     0.02  -0.07  -0.02
   3   6     0.03  -0.02   0.22    -0.10   0.06   0.33     0.11  -0.07   0.13
   4   8    -0.01  -0.02  -0.06     0.09   0.05  -0.09    -0.10  -0.05  -0.03
   5   8     0.00  -0.02  -0.05    -0.09  -0.07  -0.06     0.11   0.11  -0.02
   6   6    -0.02   0.00   0.00     0.06   0.02  -0.01    -0.05  -0.03  -0.01
   7   6    -0.02   0.04  -0.02     0.03  -0.06  -0.04    -0.02   0.04  -0.03
   8   6    -0.05   0.01   0.00     0.07   0.01   0.00    -0.06  -0.03   0.00
   9   6     0.01  -0.16  -0.09     0.01   0.06   0.02    -0.07   0.16   0.10
  10   6    -0.05  -0.01   0.14     0.02   0.01  -0.05     0.00  -0.06   0.00
  11   6    -0.04  -0.09   0.09     0.01   0.04  -0.07    -0.02  -0.03   0.04
  12   6     0.05   0.12   0.04    -0.06  -0.05  -0.02     0.06  -0.07  -0.05
  13   6    -0.05   0.02  -0.10     0.09  -0.02   0.10    -0.02   0.01  -0.04
  14   6    -0.01   0.01   0.01     0.01  -0.02  -0.04     0.00   0.03   0.07
  15   6    -0.01  -0.01   0.01     0.01  -0.05   0.07    -0.01   0.04  -0.06
  16   6    -0.07   0.08  -0.03     0.06  -0.04   0.09     0.00  -0.03  -0.05
  17   1     0.10   0.15   0.25    -0.04  -0.16   0.45     0.00   0.01   0.16
  18   1    -0.02  -0.05   0.04    -0.07  -0.08   0.07    -0.23  -0.13   0.08
  19   1     0.08   0.03   0.02     0.17   0.12   0.07     0.04   0.10   0.08
  20   1    -0.07  -0.06   0.03     0.09   0.05   0.06    -0.01   0.02   0.08
  21   1    -0.02  -0.06   0.05     0.00  -0.24   0.10    -0.16  -0.13   0.11
  22   1     0.02   0.12   0.05     0.13   0.12   0.10     0.02   0.22   0.10
  23   1     0.01  -0.13   0.00     0.04   0.08   0.00    -0.06  -0.02   0.00
  24   1     0.01  -0.04   0.09    -0.05   0.03   0.01     0.04  -0.11  -0.04
  25   1    -0.07  -0.41  -0.17     0.04   0.19   0.06    -0.18   0.26   0.19
  26   1     0.19  -0.23  -0.19    -0.13   0.13   0.02    -0.11   0.37   0.20
  27   1    -0.02  -0.38  -0.23     0.18   0.16   0.09    -0.19   0.30   0.17
  28   1     0.02  -0.05  -0.07    -0.03   0.08   0.09     0.01   0.00  -0.02
  29   1     0.04   0.02   0.03    -0.08   0.00  -0.03     0.05   0.08   0.11
  30   1     0.06   0.06   0.07    -0.09  -0.09  -0.16     0.05   0.07   0.09
  31   1     0.04  -0.13   0.10    -0.03   0.02  -0.04     0.02  -0.02   0.02
  32   1     0.07  -0.04   0.02    -0.05  -0.10   0.11     0.05   0.07  -0.09
  33   1     0.07   0.08  -0.12    -0.06  -0.11   0.10     0.04   0.09  -0.10
  34   1     0.02   0.03  -0.03     0.05  -0.08   0.06     0.03  -0.06  -0.06
                    31                     32                     33
                     A                      A                      A
 Frequencies --   817.9894               851.2907               864.8435
 Red. masses --     1.1912                 1.2541                 2.6866
 Frc consts  --     0.4696                 0.5355                 1.1839
 IR Inten    --     0.6922                 0.4165                 0.1521
 Atom AN      X      Y      Z        X      Y      Z        X      Y      Z
   1   6     0.00  -0.01  -0.03     0.00   0.00   0.00    -0.05  -0.02   0.00
   2   6     0.00  -0.01  -0.02     0.00   0.00   0.00     0.11  -0.07  -0.01
   3   6     0.01  -0.01   0.07     0.00  -0.01  -0.01    -0.08   0.06   0.00
   4   8    -0.01   0.00  -0.02    -0.01  -0.01   0.00     0.05   0.07   0.00
   5   8     0.01   0.01  -0.04     0.01   0.01   0.00    -0.07  -0.04   0.00
   6   6     0.00   0.00   0.04     0.00   0.00   0.00     0.05   0.02   0.00
   7   6     0.00   0.00   0.07     0.00   0.00   0.00     0.01  -0.05   0.00
   8   6     0.00   0.00   0.00     0.00   0.00   0.00    -0.09  -0.15  -0.01
   9   6    -0.01   0.02   0.01     0.00   0.00   0.00    -0.01  -0.01  -0.01
  10   6     0.00  -0.01   0.00     0.02  -0.06  -0.04     0.01   0.00  -0.02
  11   6     0.00   0.00   0.00     0.02  -0.06  -0.03     0.01   0.01  -0.03
  12   6     0.01  -0.01  -0.01     0.00   0.00   0.00    -0.02   0.00   0.00
  13   6     0.00   0.00   0.00    -0.03   0.06   0.03     0.02   0.00   0.03
  14   6     0.00   0.00   0.01     0.00   0.00   0.00    -0.01   0.06   0.17
  15   6     0.00   0.00   0.00     0.00   0.00   0.01    -0.03   0.08  -0.16
  16   6     0.00   0.00   0.00    -0.02   0.06   0.03     0.01   0.00   0.02
  17   1     0.00  -0.01   0.10     0.00   0.01   0.00     0.12  -0.14   0.00
  18   1     0.31   0.27  -0.20    -0.01   0.00   0.00     0.03   0.02   0.00
  19   1    -0.35  -0.27  -0.17    -0.01   0.00   0.00     0.04   0.02   0.00
  20   1     0.00   0.01  -0.19     0.01   0.01   0.00     0.08   0.05   0.00
  21   1     0.24   0.37  -0.23    -0.01   0.00   0.00     0.02  -0.05   0.00
  22   1    -0.27  -0.36  -0.21     0.00   0.00   0.00     0.02  -0.05   0.00
  23   1     0.00   0.00   0.00     0.00   0.01  -0.02     0.00  -0.37  -0.01
  24   1     0.00  -0.01   0.00    -0.16   0.41   0.25    -0.02   0.07   0.02
  25   1    -0.03   0.04   0.03    -0.16   0.40   0.24     0.03   0.04   0.00
  26   1    -0.02   0.05   0.02     0.00  -0.01   0.00     0.00  -0.05  -0.03
  27   1    -0.01   0.04   0.02     0.16  -0.41  -0.23     0.07  -0.04  -0.02
  28   1     0.00   0.01   0.00     0.00   0.00  -0.01     0.04  -0.04  -0.14
  29   1     0.00   0.02   0.02     0.00   0.00  -0.01     0.16   0.25   0.34
  30   1     0.00   0.01   0.00     0.00   0.00   0.00     0.14   0.18   0.16
  31   1     0.00  -0.01   0.01     0.00   0.01  -0.01     0.06  -0.07   0.14
  32   1     0.01   0.00   0.00    -0.01  -0.02   0.02     0.14   0.31  -0.33
  33   1     0.00   0.01  -0.01    -0.01  -0.01   0.00     0.13   0.21  -0.15
  34   1     0.01  -0.02  -0.01     0.16  -0.40  -0.22     0.00  -0.01   0.02
                    34                     35                     36
                     A                      A                      A
 Frequencies --   885.8583               926.1429               940.4529
 Red. masses --     2.5169                 1.5023                 1.1933
 Frc consts  --     1.1637                 0.7592                 0.6218
 IR Inten    --     8.0397                 2.9502                 0.3981
 Atom AN      X      Y      Z        X      Y      Z        X      Y      Z
   1   6    -0.04   0.03   0.00     0.02   0.00   0.03     0.00   0.00   0.00
   2   6     0.04   0.03   0.00     0.02   0.01  -0.01     0.00   0.00   0.00
   3   6    -0.07  -0.06   0.00    -0.02   0.01  -0.02     0.00   0.00  -0.01
   4   8    -0.04  -0.10   0.00     0.01   0.00   0.00     0.00   0.00   0.00
   5   8    -0.03   0.22   0.00    -0.04   0.01   0.00     0.00   0.00   0.00
   6   6     0.12  -0.05   0.00     0.04   0.00   0.00     0.00   0.00   0.00
   7   6     0.05  -0.13   0.00     0.00  -0.03   0.00     0.00   0.00   0.00
   8   6    -0.01   0.02   0.00     0.00   0.01   0.00     0.00   0.00  -0.05
   9   6     0.00  -0.02  -0.02     0.03  -0.06  -0.04     0.00   0.00   0.00
  10   6     0.01  -0.01  -0.01    -0.03   0.08   0.05     0.00   0.01   0.01
  11   6     0.00   0.02  -0.01     0.00  -0.01   0.00     0.00   0.00   0.00
  12   6    -0.02   0.03   0.01     0.03  -0.08  -0.04     0.00  -0.01   0.00
  13   6     0.02   0.00   0.02     0.00  -0.01  -0.01     0.00   0.01   0.00
  14   6    -0.01   0.00  -0.02    -0.01   0.00   0.00     0.06   0.06  -0.02
  15   6    -0.01   0.00   0.02     0.00   0.00   0.01    -0.06  -0.06  -0.02
  16   6     0.01  -0.02   0.01    -0.03   0.09   0.04     0.00   0.00   0.00
  17   1     0.05   0.01   0.03     0.02   0.01   0.04     0.00   0.01   0.04
  18   1    -0.29   0.06  -0.03    -0.03   0.02  -0.01     0.00   0.00   0.00
  19   1    -0.29   0.06   0.05    -0.02   0.02   0.01     0.00   0.00   0.00
  20   1     0.53   0.49  -0.02     0.11   0.09   0.00     0.01   0.01   0.00
  21   1    -0.19  -0.07   0.00    -0.04  -0.02   0.00     0.00   0.00   0.00
  22   1    -0.18  -0.07   0.02    -0.04  -0.02   0.00     0.00   0.00   0.00
  23   1     0.02  -0.05   0.00     0.01  -0.01  -0.05     0.02  -0.02   0.33
  24   1    -0.04   0.10   0.06     0.17  -0.43  -0.25     0.02  -0.05  -0.02
  25   1     0.04  -0.06  -0.05    -0.01   0.02   0.01    -0.01   0.02   0.01
  26   1     0.05  -0.15  -0.10    -0.18   0.46   0.27    -0.02   0.04   0.03
  27   1     0.05  -0.01  -0.01    -0.02   0.02   0.01     0.01  -0.03  -0.02
  28   1     0.01  -0.04  -0.03     0.00  -0.03  -0.05     0.02   0.12   0.45
  29   1     0.01  -0.03  -0.04     0.02   0.01   0.01    -0.19  -0.26  -0.29
  30   1     0.02   0.02   0.04     0.02   0.02   0.01    -0.12  -0.10   0.12
  31   1     0.01  -0.05   0.04     0.00  -0.01  -0.03     0.03  -0.17   0.42
  32   1     0.02  -0.04   0.03    -0.01  -0.06   0.05     0.16   0.29  -0.26
  33   1     0.02   0.03  -0.05    -0.01   0.00  -0.04     0.13   0.07   0.13
  34   1    -0.05   0.13   0.09     0.18  -0.46  -0.26     0.02  -0.03  -0.02
                    37                     38                     39
                     A                      A                      A
 Frequencies --   953.4389               962.8298               969.4373
 Red. masses --     1.4521                 1.8847                 1.4868
 Frc consts  --     0.7777                 1.0294                 0.8233
 IR Inten    --     4.4042                24.0404                 2.9000
 Atom AN      X      Y      Z        X      Y      Z        X      Y      Z
   1   6    -0.02  -0.01   0.07    -0.06  -0.06  -0.02    -0.02  -0.01   0.01
   2   6     0.01   0.00  -0.15     0.12  -0.08   0.04     0.02  -0.01  -0.03
   3   6     0.00   0.00  -0.08     0.00   0.01   0.03     0.00   0.00  -0.01
   4   8     0.00   0.00   0.02     0.00   0.02  -0.01     0.00   0.00   0.00
   5   8     0.02   0.00   0.01     0.03  -0.01  -0.01     0.01   0.00   0.00
   6   6    -0.02   0.00   0.00    -0.03   0.00   0.00    -0.01   0.00   0.00
   7   6     0.01   0.01   0.00     0.01   0.01   0.00     0.01   0.01   0.00
   8   6     0.00   0.02   0.00    -0.02   0.11   0.05    -0.01   0.03  -0.08
   9   6    -0.01   0.01   0.00    -0.04  -0.02   0.00    -0.01   0.00   0.00
  10   6     0.01  -0.01   0.00     0.00   0.01  -0.02     0.02  -0.05  -0.04
  11   6     0.00   0.01  -0.01     0.02   0.02  -0.04    -0.01   0.06   0.02
  12   6     0.00   0.00   0.00     0.00   0.00   0.00     0.00   0.01   0.00
  13   6     0.01  -0.01   0.01     0.03   0.00   0.04     0.03  -0.06  -0.02
  14   6     0.01  -0.01   0.01    -0.06   0.00  -0.10    -0.04   0.08   0.03
  15   6    -0.03   0.02   0.03    -0.07   0.05   0.05     0.02  -0.07   0.04
  16   6     0.00   0.00   0.00     0.01  -0.01   0.01    -0.02   0.05   0.03
  17   1     0.05  -0.12   0.86     0.17  -0.30  -0.30     0.04  -0.08   0.09
  18   1     0.00  -0.02   0.01     0.03  -0.01   0.01     0.00  -0.01   0.00
  19   1     0.02   0.00   0.00     0.02  -0.02  -0.01     0.01  -0.01   0.00
  20   1    -0.05  -0.04   0.01    -0.09  -0.07   0.00    -0.03  -0.03   0.00
  21   1     0.01   0.01   0.00     0.05   0.01   0.00     0.02   0.01   0.00
  22   1     0.04   0.01   0.00     0.04   0.01   0.00     0.02   0.01   0.00
  23   1     0.01  -0.03   0.04     0.05  -0.08   0.12     0.00  -0.01  -0.25
  24   1    -0.01   0.03   0.02     0.01   0.00  -0.03    -0.11   0.28   0.16
  25   1     0.01  -0.01  -0.02     0.05   0.05  -0.01     0.12  -0.26  -0.16
  26   1     0.01  -0.03  -0.02     0.00   0.00   0.01     0.02  -0.04  -0.02
  27   1     0.01   0.03   0.02     0.06  -0.01   0.01    -0.12   0.32   0.19
  28   1    -0.02   0.07   0.03     0.02  -0.19  -0.14     0.06  -0.15  -0.06
  29   1    -0.04   0.08   0.07     0.04  -0.21  -0.24     0.10  -0.13  -0.10
  30   1    -0.04  -0.04  -0.13     0.08   0.08   0.23     0.14   0.18   0.39
  31   1     0.04  -0.16   0.06     0.07  -0.25   0.12    -0.04   0.05   0.03
  32   1     0.08  -0.16   0.10     0.12  -0.23   0.16    -0.07   0.05   0.00
  33   1     0.06   0.13  -0.25     0.13   0.26  -0.42    -0.05  -0.15   0.24
  34   1     0.00   0.01   0.01     0.01   0.00   0.03     0.12  -0.30  -0.16
                    40                     41                     42
                     A                      A                      A
 Frequencies --   972.0631               992.5658               998.4279
 Red. masses --     1.4737                 1.5254                 2.6592
 Frc consts  --     0.8205                 0.8855                 1.5618
 IR Inten    --     1.0323                 5.2178                17.3139
 Atom AN      X      Y      Z        X      Y      Z        X      Y      Z
   1   6     0.02   0.01  -0.01    -0.06   0.04   0.00     0.15  -0.11   0.00
   2   6    -0.02   0.01   0.04    -0.01   0.03   0.01     0.01  -0.09  -0.02
   3   6     0.00   0.00   0.01    -0.01  -0.02   0.00     0.03   0.05   0.00
   4   8     0.00   0.00   0.00    -0.01  -0.03   0.00     0.02   0.08   0.00
   5   8    -0.01   0.00   0.00     0.05   0.02   0.00    -0.12  -0.06   0.00
   6   6     0.01   0.00   0.00    -0.05  -0.02   0.00     0.13   0.04   0.00
   7   6    -0.01   0.00   0.00     0.04   0.02   0.00    -0.11  -0.05   0.00
   8   6     0.01  -0.02   0.08     0.01  -0.02   0.00    -0.02   0.05  -0.01
   9   6     0.01   0.00   0.00    -0.02  -0.03  -0.02     0.05   0.07   0.04
  10   6     0.02  -0.05  -0.03     0.00  -0.02  -0.02     0.02  -0.05  -0.02
  11   6    -0.02   0.05   0.04    -0.02   0.08   0.02    -0.04   0.01   0.08
  12   6     0.00   0.00   0.00     0.04  -0.07  -0.05     0.01  -0.05  -0.02
  13   6     0.01  -0.05  -0.04     0.00   0.05   0.06    -0.07   0.05  -0.04
  14   6     0.04  -0.07  -0.04     0.00  -0.01   0.01    -0.01   0.02  -0.03
  15   6    -0.02   0.07  -0.05     0.00   0.00  -0.02     0.00   0.01   0.04
  16   6    -0.02   0.06   0.03     0.00  -0.03   0.01     0.02  -0.02  -0.05
  17   1    -0.03   0.07  -0.16     0.01  -0.01  -0.03    -0.01   0.01   0.11
  18   1     0.00   0.01   0.00    -0.02  -0.04   0.01     0.05   0.09  -0.02
  19   1     0.00   0.00   0.00    -0.02  -0.04  -0.01     0.06   0.09   0.02
  20   1     0.02   0.02   0.00    -0.11  -0.08   0.00     0.24   0.19  -0.01
  21   1    -0.01  -0.01   0.00     0.08   0.02  -0.01    -0.20  -0.05   0.02
  22   1    -0.02   0.00   0.00     0.08   0.02   0.00    -0.20  -0.05   0.00
  23   1     0.01   0.00   0.26     0.03  -0.07   0.00    -0.07   0.17  -0.01
  24   1    -0.11   0.28   0.17    -0.07   0.19   0.10    -0.11   0.26   0.18
  25   1     0.11  -0.29  -0.16     0.18  -0.41  -0.26     0.09  -0.33  -0.12
  26   1     0.01  -0.02   0.00    -0.17   0.48   0.26    -0.11   0.24   0.18
  27   1    -0.14   0.30   0.17     0.19  -0.37  -0.20     0.01  -0.26  -0.19
  28   1    -0.05   0.14   0.09     0.00   0.00  -0.03     0.01  -0.03   0.04
  29   1    -0.11   0.10   0.07     0.01   0.04   0.05    -0.02  -0.10  -0.12
  30   1    -0.14  -0.17  -0.36     0.00   0.00  -0.04     0.00   0.02   0.12
  31   1     0.04  -0.07   0.02     0.00   0.01   0.01     0.00  -0.01  -0.05
  32   1     0.08  -0.03  -0.02     0.00   0.05  -0.05    -0.02  -0.12   0.11
  33   1     0.07   0.16  -0.23     0.00  -0.01   0.04    -0.02   0.00  -0.07
  34   1     0.13  -0.32  -0.18    -0.07   0.14   0.11    -0.08   0.25   0.10
                    43                     44                     45
                     A                      A                      A
 Frequencies --  1019.0221              1050.5427              1064.9050
 Red. masses --     6.2129                 2.5118                 3.2423
 Frc consts  --     3.8011                 1.6333                 2.1663
 IR Inten    --     1.0905                31.8253               106.1071
 Atom AN      X      Y      Z        X      Y      Z        X      Y      Z
   1   6     0.03  -0.01   0.00     0.00  -0.01   0.00     0.11  -0.06   0.00
   2   6     0.00   0.00   0.00     0.00  -0.02   0.00     0.01  -0.04   0.00
   3   6     0.01   0.00   0.00    -0.03   0.01   0.00    -0.02   0.03   0.00
   4   8     0.00   0.01   0.00     0.00   0.00   0.00     0.01   0.04   0.00
   5   8    -0.01  -0.01   0.00    -0.05   0.05   0.00    -0.19   0.10   0.01
   6   6     0.02   0.01   0.00    -0.07  -0.03   0.00    -0.12  -0.05   0.00
   7   6    -0.03  -0.01   0.00     0.12  -0.02   0.00     0.27  -0.07  -0.01
   8   6     0.00   0.00  -0.01     0.00   0.00   0.00    -0.02   0.00   0.00
   9   6     0.01   0.00   0.00     0.04   0.02   0.00     0.06   0.03   0.02
  10   6    -0.24   0.09  -0.30     0.02   0.05  -0.07    -0.02  -0.04   0.03
  11   6    -0.01  -0.03   0.02     0.00  -0.10   0.17    -0.02   0.03  -0.06
  12   6     0.37   0.15   0.01    -0.11  -0.04   0.00     0.08   0.02   0.01
  13   6    -0.02   0.00  -0.04    -0.06   0.07  -0.17    -0.01  -0.03   0.05
  14   6     0.00   0.00   0.00    -0.01   0.00   0.00     0.01   0.01  -0.01
  15   6     0.00   0.00   0.00     0.00   0.00   0.00     0.01   0.01   0.01
  16   6    -0.13  -0.22   0.30     0.05  -0.02   0.07    -0.02   0.01  -0.05
  17   1     0.00   0.03   0.04     0.01  -0.05   0.00    -0.03   0.12   0.02
  18   1     0.01   0.02   0.00    -0.03  -0.07   0.02    -0.05  -0.13   0.04
  19   1     0.01   0.02   0.00    -0.03  -0.06  -0.02    -0.05  -0.13  -0.04
  20   1     0.04   0.04   0.00    -0.13  -0.11   0.01    -0.24  -0.21   0.01
  21   1    -0.05  -0.01   0.00     0.18   0.01  -0.02     0.35   0.00  -0.05
  22   1    -0.05  -0.01   0.00     0.18   0.01   0.01     0.36   0.00   0.02
  23   1    -0.01   0.01   0.00     0.00   0.00   0.00    -0.07   0.13   0.01
  24   1    -0.22   0.07  -0.34     0.25   0.21  -0.20    -0.22  -0.13   0.16
  25   1    -0.05   0.03   0.03     0.31  -0.07   0.34    -0.23   0.01  -0.18
  26   1     0.40   0.11  -0.01    -0.12  -0.04  -0.01     0.09   0.01   0.05
  27   1    -0.04   0.02   0.01     0.20   0.27  -0.33    -0.22  -0.19   0.17
  28   1     0.00   0.01   0.02     0.00  -0.02  -0.01     0.00   0.03   0.07
  29   1    -0.01   0.00  -0.01     0.01  -0.01  -0.01    -0.03  -0.04  -0.05
  30   1    -0.01  -0.01  -0.01     0.01   0.01   0.03    -0.03  -0.02   0.02
  31   1     0.00  -0.01   0.01     0.00  -0.01   0.00    -0.01   0.03  -0.06
  32   1     0.00  -0.01   0.01     0.00  -0.01   0.01    -0.03  -0.05   0.05
  33   1     0.00   0.00   0.00     0.00   0.01  -0.02    -0.03  -0.02  -0.02
  34   1    -0.12  -0.24   0.30     0.32   0.02   0.22    -0.20   0.02  -0.13
                    46                     47                     48
                     A                      A                      A
 Frequencies --  1102.7644              1113.6207              1139.6359
 Red. masses --     1.6183                 2.3075                 2.1640
 Frc consts  --     1.1595                 1.6860                 1.6559
 IR Inten    --     8.5870                 2.1024                 4.9521
 Atom AN      X      Y      Z        X      Y      Z        X      Y      Z
   1   6     0.01  -0.01   0.02     0.00   0.00   0.03     0.00   0.00   0.00
   2   6     0.00  -0.02   0.01     0.00   0.00  -0.09     0.01   0.01   0.00
   3   6     0.01   0.00   0.00     0.00   0.00   0.00     0.00  -0.01   0.00
   4   8     0.00   0.01   0.00     0.00   0.00   0.00    -0.02  -0.04   0.00
   5   8    -0.01   0.00   0.00     0.00   0.00   0.00     0.02   0.10   0.00
   6   6     0.00   0.00   0.00     0.00   0.00   0.00    -0.01   0.19   0.00
   7   6     0.01  -0.01   0.00     0.00   0.00   0.00    -0.05  -0.22   0.00
   8   6    -0.01   0.00  -0.03     0.01  -0.01   0.26    -0.01   0.00   0.00
   9   6     0.00   0.03  -0.05     0.00   0.01  -0.01    -0.01  -0.01   0.00
  10   6     0.11   0.01   0.04     0.02   0.00   0.01     0.00   0.00   0.00
  11   6    -0.05  -0.05   0.05    -0.01  -0.01   0.01     0.00   0.00   0.00
  12   6    -0.01   0.04  -0.08     0.00   0.01  -0.01     0.00   0.00   0.00
  13   6     0.06  -0.01   0.05     0.01   0.00   0.01     0.00   0.00   0.00
  14   6     0.01   0.00   0.01    -0.08   0.00  -0.11     0.00   0.00   0.00
  15   6    -0.01   0.00   0.02     0.08   0.01  -0.12     0.00   0.00   0.00
  16   6    -0.10  -0.06   0.03    -0.02  -0.01   0.01     0.00   0.00   0.00
  17   1    -0.01   0.01  -0.07     0.01  -0.03   0.25     0.00   0.05   0.00
  18   1     0.01   0.00   0.00     0.00   0.00   0.00     0.53   0.03   0.06
  19   1     0.01   0.00   0.00     0.00   0.00   0.00     0.52   0.03  -0.09
  20   1    -0.01  -0.01   0.00     0.00   0.00   0.00    -0.37  -0.31   0.01
  21   1     0.00   0.00   0.00     0.00   0.00   0.00    -0.06  -0.20  -0.01
  22   1     0.00   0.00   0.00     0.00   0.00   0.00    -0.06  -0.20   0.02
  23   1    -0.02   0.02  -0.05     0.02  -0.02   0.42    -0.01   0.01   0.00
  24   1     0.37   0.21  -0.10     0.07   0.04  -0.02     0.00   0.00  -0.01
  25   1    -0.27  -0.08  -0.06    -0.06  -0.01  -0.01     0.02   0.00   0.00
  26   1    -0.09   0.25  -0.50    -0.01   0.05  -0.09     0.00   0.00   0.01
  27   1     0.24   0.12  -0.04     0.03   0.02   0.00     0.01   0.00   0.00
  28   1     0.00   0.03   0.04     0.02  -0.26  -0.17     0.00   0.01   0.01
  29   1    -0.01   0.02   0.02     0.05  -0.23  -0.25    -0.01   0.00   0.00
  30   1    -0.01  -0.01  -0.02     0.06   0.07   0.25    -0.01  -0.01  -0.01
  31   1     0.00  -0.03   0.00    -0.04   0.30  -0.13     0.00   0.01  -0.01
  32   1     0.01  -0.05   0.04    -0.09   0.27  -0.22    -0.01   0.00   0.00
  33   1     0.00   0.02  -0.04    -0.04  -0.12   0.27    -0.01  -0.01   0.01
  34   1    -0.46  -0.11  -0.16    -0.08  -0.04  -0.04     0.02   0.00   0.01
                    49                     50                     51
                     A                      A                      A
 Frequencies --  1167.5428              1184.5468              1184.7901
 Red. masses --     2.1739                 1.5473                 1.1287
 Frc consts  --     1.7460                 1.2792                 0.9335
 IR Inten    --    67.1934                 3.2367                 1.1947
 Atom AN      X      Y      Z        X      Y      Z        X      Y      Z
   1   6    -0.01   0.03   0.00     0.00   0.00   0.00     0.00   0.00   0.00
   2   6    -0.14   0.02   0.01     0.00   0.00   0.00     0.00   0.00   0.00
   3   6     0.09  -0.01   0.00     0.00   0.00  -0.01     0.01   0.00   0.00
   4   8    -0.01  -0.01   0.00     0.00   0.00   0.00     0.00   0.00   0.00
   5   8    -0.04   0.01   0.00     0.00   0.00   0.05    -0.01   0.00   0.00
   6   6     0.00   0.01   0.00     0.00   0.00   0.12     0.00   0.00   0.01
   7   6     0.01  -0.02   0.00    -0.01   0.00  -0.17     0.00   0.00  -0.02
   8   6     0.18   0.07   0.00     0.00   0.00   0.00     0.01   0.00   0.00
   9   6     0.11   0.05   0.01     0.00   0.00   0.00    -0.01   0.00   0.00
  10   6     0.01   0.00   0.01     0.00   0.00   0.00     0.01   0.01  -0.01
  11   6    -0.03  -0.02   0.02     0.00   0.00   0.00    -0.04   0.00  -0.02
  12   6     0.02   0.01   0.00     0.00   0.00  -0.01     0.01  -0.03   0.06
  13   6    -0.04   0.00  -0.02    -0.01   0.00   0.00     0.04   0.03  -0.02
  14   6    -0.08  -0.04   0.02     0.00   0.00   0.00     0.00   0.00   0.00
  15   6    -0.09  -0.04  -0.02     0.00   0.00   0.00     0.00   0.00   0.00
  16   6     0.01   0.01  -0.01     0.00   0.00   0.00    -0.01   0.00  -0.01
  17   1    -0.05  -0.33  -0.03     0.00   0.00   0.01     0.00   0.01   0.01
  18   1     0.02   0.00   0.00     0.27   0.28  -0.12     0.02   0.02  -0.01
  19   1     0.02   0.00  -0.01    -0.28  -0.28  -0.10    -0.02  -0.02  -0.01
  20   1    -0.01  -0.01   0.00    -0.01   0.00  -0.25     0.00   0.00  -0.02
  21   1    -0.05   0.00   0.00     0.19  -0.46   0.14     0.01  -0.04   0.01
  22   1    -0.05   0.00   0.00    -0.18   0.46   0.15    -0.02   0.04   0.01
  23   1     0.30  -0.26  -0.04     0.00   0.00   0.00     0.01   0.00   0.00
  24   1    -0.08  -0.07   0.06    -0.01  -0.01   0.01     0.11   0.08  -0.07
  25   1    -0.12  -0.03  -0.02     0.05   0.00   0.02    -0.40  -0.04  -0.20
  26   1     0.01   0.02  -0.02    -0.01   0.04  -0.07     0.10  -0.30   0.59
  27   1    -0.13  -0.07   0.03    -0.05  -0.03   0.03     0.38   0.28  -0.22
  28   1    -0.01  -0.16  -0.36     0.00   0.00   0.00     0.00   0.00  -0.01
  29   1     0.19   0.10   0.16     0.00   0.00   0.00     0.00   0.00   0.01
  30   1     0.14   0.14  -0.01     0.00   0.00   0.00     0.00   0.00   0.00
  31   1     0.02  -0.21   0.34     0.00   0.00   0.00     0.00   0.00   0.01
  32   1     0.17   0.12  -0.16     0.00   0.00   0.00     0.00   0.00  -0.01
  33   1     0.15   0.14   0.02     0.00   0.00   0.00     0.00   0.00   0.00
  34   1    -0.11   0.00  -0.07     0.02   0.00   0.01    -0.16  -0.02  -0.09
                    52                     53                     54
                     A                      A                      A
 Frequencies --  1193.5884              1199.2262              1208.2285
 Red. masses --     1.9533                 3.6880                 1.1427
 Frc consts  --     1.6396                 3.1250                 0.9829
 IR Inten    --     8.2115               306.5337                 3.0744
 Atom AN      X      Y      Z        X      Y      Z        X      Y      Z
   1   6     0.03  -0.04   0.00     0.03   0.00   0.00     0.00   0.00   0.00
   2   6     0.10  -0.02  -0.01    -0.05   0.07   0.00     0.00   0.00   0.00
   3   6     0.02   0.01   0.00     0.30  -0.01  -0.01    -0.02   0.00   0.00
   4   8     0.00   0.02   0.00    -0.03   0.02   0.00     0.00   0.00   0.00
   5   8    -0.03   0.00   0.00    -0.17  -0.01   0.01     0.01   0.00   0.00
   6   6     0.00   0.00   0.00     0.00   0.00   0.00     0.00   0.00   0.00
   7   6     0.01   0.00   0.00     0.05  -0.02   0.00     0.00   0.00   0.00
   8   6    -0.03   0.18   0.01     0.08  -0.07  -0.01     0.00   0.01   0.00
   9   6    -0.09  -0.03   0.00    -0.24  -0.09   0.01     0.01   0.01   0.00
  10   6     0.00   0.00   0.00    -0.03  -0.01  -0.01    -0.04  -0.03   0.03
  11   6     0.02   0.02  -0.02     0.07   0.05  -0.04     0.05   0.00   0.02
  12   6    -0.01   0.00   0.00    -0.03  -0.01   0.00     0.01   0.00   0.00
  13   6     0.02   0.00   0.02     0.08   0.01   0.04     0.03   0.03  -0.02
  14   6    -0.02  -0.11   0.03    -0.01   0.03   0.00     0.00   0.00   0.00
  15   6    -0.02  -0.11  -0.04    -0.01   0.03   0.01     0.00   0.00   0.00
  16   6    -0.01  -0.01   0.00    -0.04  -0.01  -0.01    -0.05   0.00  -0.03
  17   1     0.09   0.04   0.00    -0.13   0.43   0.05     0.00  -0.01   0.00
  18   1    -0.01   0.00   0.00     0.00  -0.01   0.01     0.00   0.00   0.00
  19   1    -0.01   0.00   0.00    -0.01  -0.02  -0.01     0.00   0.00   0.00
  20   1     0.01   0.00   0.00     0.01   0.01   0.00     0.00   0.00   0.00
  21   1     0.00   0.00   0.00    -0.14   0.02   0.00     0.01   0.00   0.00
  22   1     0.00   0.01   0.00    -0.14   0.03   0.01     0.01   0.00   0.00
  23   1    -0.14   0.48   0.02     0.17  -0.32  -0.01    -0.01   0.02   0.00
  24   1     0.09   0.08  -0.06     0.14   0.14  -0.11    -0.38  -0.28   0.22
  25   1     0.08   0.02   0.01     0.37   0.08   0.11     0.45   0.04   0.23
  26   1    -0.01   0.01  -0.03    -0.03   0.02  -0.07     0.00   0.01  -0.02
  27   1     0.06   0.02   0.00     0.23   0.12  -0.04     0.32   0.24  -0.19
  28   1    -0.08   0.08  -0.25     0.03  -0.06   0.03     0.00   0.00  -0.01
  29   1     0.03   0.23   0.28     0.04  -0.07  -0.07     0.00   0.01   0.01
  30   1     0.03  -0.02  -0.31     0.03   0.05   0.11     0.00   0.00  -0.01
  31   1    -0.05   0.03   0.28     0.02  -0.05  -0.05     0.00   0.00   0.01
  32   1     0.01   0.26  -0.24     0.04  -0.07   0.05     0.00   0.01  -0.01
  33   1     0.06  -0.06   0.30     0.02   0.06  -0.11     0.00   0.00   0.02
  34   1     0.10   0.00   0.06     0.19   0.01   0.12    -0.44  -0.05  -0.23
                    55                     56                     57
                     A                      A                      A
 Frequencies --  1274.1603              1309.0970              1317.4513
 Red. masses --     2.5624                 1.0943                 4.1479
 Frc consts  --     2.4510                 1.1050                 4.2418
 IR Inten    --   292.1718                 0.9769                 0.9343
 Atom AN      X      Y      Z        X      Y      Z        X      Y      Z
   1   6    -0.15   0.11   0.01     0.00   0.00   0.00     0.01   0.01  -0.03
   2   6     0.07  -0.02   0.00     0.00   0.00   0.00     0.00   0.03   0.00
   3   6     0.23  -0.02  -0.01     0.00   0.00   0.00    -0.01   0.00   0.01
   4   8    -0.03  -0.01   0.00     0.00   0.00   0.00     0.00  -0.01   0.00
   5   8    -0.08  -0.01   0.00     0.00   0.00   0.03     0.00   0.00   0.00
   6   6     0.00   0.01   0.00     0.00   0.00  -0.08     0.00   0.00   0.00
   7   6     0.04  -0.01   0.00     0.00   0.00   0.01     0.00   0.00   0.00
   8   6    -0.15   0.01   0.00     0.00   0.00   0.00    -0.04   0.03   0.01
   9   6     0.08   0.03  -0.02     0.00   0.00   0.00     0.06  -0.16   0.30
  10   6     0.01   0.00   0.01     0.00   0.00   0.00     0.10   0.10  -0.10
  11   6    -0.01  -0.01   0.02     0.00   0.00   0.00    -0.16  -0.01  -0.10
  12   6     0.00   0.00   0.00     0.00   0.00   0.00     0.02  -0.07   0.14
  13   6    -0.02   0.00  -0.01     0.00   0.00   0.00     0.13   0.11  -0.10
  14   6     0.06  -0.01   0.00     0.00   0.00   0.00     0.03  -0.01   0.00
  15   6     0.05  -0.01   0.00     0.00   0.00   0.00     0.02  -0.01   0.00
  16   6     0.02   0.00   0.01     0.00   0.00   0.00    -0.14   0.01  -0.11
  17   1     0.24  -0.70  -0.07     0.00   0.00   0.00     0.06  -0.21   0.06
  18   1     0.01  -0.02   0.01    -0.15  -0.16   0.05     0.00  -0.01   0.00
  19   1     0.01  -0.02  -0.01     0.15   0.16   0.04     0.01   0.01   0.00
  20   1    -0.02  -0.01   0.00     0.00   0.00   0.10     0.00   0.00   0.00
  21   1    -0.21   0.04   0.01     0.66  -0.09  -0.01     0.03  -0.01   0.00
  22   1    -0.21   0.04   0.01    -0.66   0.09   0.03    -0.02   0.00   0.00
  23   1    -0.16   0.03  -0.01     0.00   0.00   0.00     0.05  -0.23  -0.06
  24   1    -0.11  -0.11   0.07     0.00   0.00   0.00     0.21   0.18  -0.17
  25   1    -0.08  -0.02  -0.02     0.00   0.00   0.00     0.38   0.04   0.17
  26   1     0.01  -0.01   0.02     0.00   0.00   0.00    -0.03   0.08  -0.16
  27   1    -0.04  -0.01   0.00     0.00   0.00   0.00    -0.32  -0.22   0.16
  28   1    -0.01   0.13   0.14     0.00   0.00   0.00     0.00   0.05   0.04
  29   1    -0.13   0.04   0.01     0.00   0.00   0.00    -0.06   0.01  -0.01
  30   1    -0.09  -0.11  -0.07     0.00   0.00   0.00    -0.03  -0.05  -0.04
  31   1    -0.02   0.14  -0.11     0.00   0.00   0.00     0.00   0.04   0.00
  32   1    -0.13   0.04   0.01     0.00   0.00   0.00    -0.05   0.00   0.01
  33   1    -0.08  -0.11   0.06     0.00   0.00   0.00    -0.02  -0.04   0.04
  34   1    -0.04  -0.01  -0.03     0.00   0.00   0.00    -0.26   0.00  -0.17
                    58                     59                     60
                     A                      A                      A
 Frequencies --  1347.7938              1353.3012              1361.5927
 Red. masses --     1.5763                 1.3152                 1.4188
 Frc consts  --     1.6871                 1.4191                 1.5497
 IR Inten    --    18.8341                 2.4910                 2.4658
 Atom AN      X      Y      Z        X      Y      Z        X      Y      Z
   1   6    -0.09   0.04   0.00     0.01   0.00   0.00     0.03  -0.02   0.01
   2   6     0.04  -0.03   0.00    -0.01   0.00   0.01    -0.02   0.00   0.00
   3   6     0.04  -0.01   0.00    -0.01   0.00   0.00    -0.01   0.00   0.00
   4   8    -0.01  -0.01   0.00     0.00   0.00   0.00     0.00   0.01   0.00
   5   8     0.00  -0.01   0.00     0.00   0.00   0.00     0.00   0.00   0.00
   6   6     0.00   0.00   0.00     0.00   0.00   0.00     0.00   0.00   0.00
   7   6     0.01   0.00   0.00     0.00   0.00   0.00    -0.01   0.00   0.00
   8   6     0.07  -0.11  -0.02    -0.02   0.03  -0.13    -0.02   0.03   0.04
   9   6     0.04   0.00   0.01     0.00   0.01  -0.01    -0.02   0.02  -0.05
  10   6     0.05   0.04  -0.02     0.02   0.01   0.00     0.08   0.04  -0.02
  11   6    -0.04  -0.01   0.00    -0.01   0.00   0.00    -0.02  -0.01   0.00
  12   6     0.01  -0.02   0.05     0.00  -0.01   0.02     0.02  -0.04   0.08
  13   6     0.02   0.02  -0.02     0.01   0.00   0.00     0.02   0.00   0.01
  14   6    -0.05   0.01   0.00    -0.04  -0.02   0.03     0.03   0.00  -0.01
  15   6    -0.04   0.02   0.01     0.06   0.01   0.03     0.00  -0.01  -0.01
  16   6    -0.04  -0.01  -0.01    -0.02   0.00  -0.01    -0.10  -0.02  -0.03
  17   1    -0.05   0.31   0.03     0.01  -0.04   0.00     0.00  -0.08  -0.02
  18   1     0.00  -0.01   0.01     0.00   0.00   0.00     0.00   0.00   0.00
  19   1     0.00  -0.01  -0.01     0.00   0.00   0.00     0.00   0.00   0.00
  20   1    -0.01  -0.01   0.00     0.00   0.00   0.00     0.01   0.01   0.00
  21   1    -0.08   0.01   0.01     0.01   0.00   0.00     0.04   0.00   0.00
  22   1    -0.07   0.01   0.00     0.01   0.00   0.00     0.04   0.00   0.00
  23   1    -0.25   0.76   0.11     0.08  -0.15   0.88     0.07  -0.23  -0.26
  24   1    -0.17  -0.14   0.11    -0.08  -0.06   0.06    -0.36  -0.28   0.23
  25   1    -0.06  -0.02  -0.02    -0.04   0.00  -0.02    -0.22  -0.03  -0.10
  26   1    -0.02   0.05  -0.10    -0.01   0.03  -0.06    -0.05   0.13  -0.27
  27   1    -0.01   0.00   0.00     0.05   0.03  -0.02     0.22   0.15  -0.11
  28   1     0.01  -0.11  -0.03    -0.04  -0.01  -0.13     0.01   0.03   0.03
  29   1     0.13  -0.02   0.01     0.07   0.05   0.10    -0.06  -0.01  -0.03
  30   1     0.05   0.08   0.10     0.09   0.10  -0.01    -0.04  -0.05  -0.04
  31   1     0.01  -0.11   0.00     0.02   0.05  -0.12    -0.01   0.03   0.03
  32   1     0.12  -0.01  -0.02    -0.09  -0.06   0.10    -0.02   0.03  -0.02
  33   1     0.04   0.09  -0.10    -0.10  -0.12   0.02     0.02   0.00   0.02
  34   1     0.11  -0.01   0.05     0.11   0.00   0.06     0.49   0.05   0.27
                    61                     62                     63
                     A                      A                      A
 Frequencies --  1407.9143              1408.9616              1409.4637
 Red. masses --     1.2836                 1.4090                 1.3542
 Frc consts  --     1.4991                 1.6480                 1.5850
 IR Inten    --     2.8969                 4.7305                 5.4223
 Atom AN      X      Y      Z        X      Y      Z        X      Y      Z
   1   6     0.02   0.04   0.00    -0.10  -0.05   0.00    -0.09  -0.04   0.00
   2   6    -0.01   0.01   0.00     0.04  -0.03   0.00     0.03  -0.02   0.00
   3   6     0.04  -0.02   0.00     0.04  -0.01   0.00     0.03   0.00   0.00
   4   8     0.00   0.00   0.00    -0.01   0.01   0.00     0.00   0.01   0.00
   5   8    -0.02   0.03   0.00    -0.01   0.00   0.00     0.00   0.00   0.00
   6   6    -0.04  -0.06   0.00    -0.01  -0.02   0.00     0.00  -0.01   0.00
   7   6    -0.11  -0.02   0.00    -0.04   0.00   0.00    -0.02   0.00   0.00
   8   6     0.00  -0.03   0.00    -0.01   0.05   0.01    -0.01   0.05   0.00
   9   6    -0.01  -0.01   0.00     0.04   0.01   0.00     0.04   0.01   0.00
  10   6    -0.01  -0.01   0.00     0.02   0.02  -0.01     0.02   0.01  -0.01
  11   6     0.00   0.00   0.00    -0.01  -0.01   0.01    -0.01  -0.01   0.01
  12   6     0.00   0.00   0.00     0.00   0.00   0.00     0.00   0.00   0.00
  13   6     0.00   0.00   0.00    -0.01   0.01  -0.01    -0.01   0.01  -0.01
  14   6     0.00   0.01   0.01    -0.01  -0.06  -0.08     0.02   0.02   0.05
  15   6     0.00   0.01   0.00     0.01   0.02  -0.04     0.00  -0.07   0.08
  16   6    -0.01   0.00   0.00     0.02   0.00   0.01     0.02   0.00   0.01
  17   1     0.06  -0.23  -0.02    -0.10   0.47   0.03    -0.09   0.42   0.03
  18   1     0.23   0.13  -0.16     0.06   0.04  -0.05     0.03   0.02  -0.03
  19   1     0.25   0.13   0.14     0.07   0.04   0.04     0.03   0.02   0.02
  20   1     0.25   0.30  -0.01     0.07   0.09   0.00     0.04   0.04   0.00
  21   1     0.50   0.00  -0.09     0.15   0.00  -0.03     0.08   0.00  -0.01
  22   1     0.51   0.01   0.05     0.16   0.00   0.01     0.08   0.00   0.01
  23   1    -0.07   0.16   0.02     0.10  -0.24  -0.03     0.09  -0.22   0.00
  24   1     0.03   0.02  -0.02    -0.07  -0.05   0.04    -0.05  -0.04   0.03
  25   1     0.03   0.01   0.01    -0.06  -0.02  -0.01    -0.04  -0.01  -0.01
  26   1     0.00   0.00   0.01    -0.01   0.00   0.00     0.00  -0.01   0.01
  27   1     0.01   0.01   0.00    -0.06  -0.03   0.01    -0.06  -0.03   0.02
  28   1     0.02  -0.06  -0.05    -0.10   0.20   0.34     0.03  -0.02  -0.21
  29   1     0.00  -0.05  -0.03     0.05   0.31   0.21    -0.08  -0.18  -0.12
  30   1    -0.04  -0.01  -0.04     0.19   0.08   0.31    -0.07  -0.03  -0.22
  31   1     0.01  -0.03  -0.01     0.04  -0.03   0.18    -0.15   0.27  -0.33
  32   1     0.02   0.00   0.00    -0.06  -0.17   0.09     0.04   0.37  -0.19
  33   1    -0.01   0.00  -0.02    -0.04  -0.05   0.20     0.17   0.13  -0.35
  34   1     0.02   0.00   0.01    -0.08   0.00  -0.04    -0.08  -0.01  -0.04
                    64                     65                     66
                     A                      A                      A
 Frequencies --  1433.2169              1436.6272              1477.5933
 Red. masses --     1.2672                 1.3814                 2.1489
 Frc consts  --     1.5336                 1.6798                 2.7642
 IR Inten    --     3.0547                14.5450                 5.0661
 Atom AN      X      Y      Z        X      Y      Z        X      Y      Z
   1   6     0.06   0.03   0.00    -0.02   0.01   0.00    -0.02   0.00  -0.02
   2   6    -0.03   0.01   0.00     0.00   0.00   0.00     0.01   0.02   0.00
   3   6    -0.02   0.00   0.00     0.04  -0.01   0.00     0.00   0.00   0.00
   4   8     0.00   0.00   0.00     0.00   0.00   0.00     0.00   0.00   0.00
   5   8     0.00   0.00   0.00    -0.01   0.02   0.00     0.00   0.00   0.00
   6   6     0.01   0.01   0.00     0.13   0.05   0.00     0.00   0.00   0.00
   7   6    -0.01   0.00   0.00    -0.10  -0.03   0.00     0.00   0.00   0.00
   8   6     0.01  -0.02   0.00     0.00   0.00   0.00     0.00  -0.01   0.00
   9   6    -0.02  -0.01   0.00     0.00   0.00   0.00     0.03  -0.07   0.13
  10   6    -0.01  -0.01   0.01     0.00   0.00   0.00    -0.09   0.00  -0.06
  11   6     0.00   0.01  -0.01     0.00   0.00   0.00     0.14   0.05   0.01
  12   6     0.00   0.00   0.00     0.00   0.00   0.00     0.02  -0.05   0.10
  13   6     0.00   0.00   0.01     0.00   0.00   0.00    -0.14  -0.06   0.00
  14   6    -0.02  -0.05  -0.08     0.00   0.01   0.01     0.00   0.00   0.00
  15   6    -0.01  -0.05   0.07     0.00   0.01  -0.01     0.00   0.00   0.00
  16   6    -0.01   0.00  -0.01     0.00   0.00   0.00     0.08   0.06  -0.05
  17   1     0.03  -0.23  -0.02     0.01  -0.01   0.00     0.01   0.00   0.03
  18   1    -0.05  -0.01   0.01    -0.45  -0.03   0.11     0.00   0.00   0.00
  19   1    -0.05  -0.01  -0.01    -0.46  -0.03  -0.08     0.00   0.00   0.00
  20   1    -0.03  -0.05   0.00    -0.25  -0.43   0.01     0.00   0.00   0.00
  21   1     0.02   0.00   0.00     0.35  -0.01  -0.07     0.01   0.00   0.00
  22   1     0.03   0.00   0.00     0.36  -0.01   0.04     0.01   0.00   0.00
  23   1    -0.02   0.08   0.01    -0.01   0.02   0.00    -0.02   0.04   0.02
  24   1     0.04   0.03  -0.02     0.00   0.00   0.00     0.05   0.11  -0.15
  25   1     0.03   0.01   0.01     0.00   0.00   0.00    -0.38   0.01  -0.26
  26   1     0.00   0.00   0.00     0.00   0.00   0.01    -0.10   0.28  -0.55
  27   1     0.04   0.02  -0.01    -0.01  -0.01   0.00     0.26   0.25  -0.25
  28   1    -0.09   0.13   0.36     0.01  -0.02  -0.04     0.00   0.00   0.00
  29   1     0.11   0.31   0.22    -0.01  -0.03  -0.02     0.01  -0.01   0.00
  30   1     0.18   0.08   0.35    -0.02  -0.01  -0.03     0.00   0.01  -0.01
  31   1    -0.12   0.18  -0.30     0.01  -0.02   0.03     0.01  -0.02  -0.02
  32   1     0.08   0.32  -0.17    -0.01  -0.03   0.02     0.02   0.01  -0.01
  33   1     0.14   0.12  -0.33    -0.02  -0.01   0.03    -0.01  -0.01   0.00
  34   1     0.05   0.00   0.02    -0.01   0.00   0.00    -0.14   0.04  -0.17
                    67                     68                     69
                     A                      A                      A
 Frequencies --  1504.0344              1504.4319              1505.1373
 Red. masses --     1.0412                 1.0382                 1.0466
 Frc consts  --     1.3877                 1.3845                 1.3969
 IR Inten    --     2.4195                 8.0833                 2.5232
 Atom AN      X      Y      Z        X      Y      Z        X      Y      Z
   1   6     0.00   0.00   0.00     0.00   0.00   0.00     0.00   0.00   0.00
   2   6     0.00   0.00   0.00     0.00   0.00   0.00     0.00   0.00   0.00
   3   6     0.00   0.00   0.00     0.00   0.00   0.00     0.00   0.00   0.00
   4   8     0.00   0.00   0.00     0.00   0.00   0.00     0.00   0.00   0.00
   5   8     0.00   0.00   0.00     0.00   0.00   0.00     0.00   0.00   0.00
   6   6     0.00   0.00  -0.02     0.00   0.00  -0.04     0.00   0.00  -0.01
   7   6     0.00   0.00  -0.01     0.00   0.00  -0.02     0.00   0.00   0.00
   8   6     0.00   0.00   0.00     0.00   0.00   0.00     0.00   0.00   0.02
   9   6     0.00   0.00   0.00     0.00   0.00   0.00     0.00   0.00   0.00
  10   6     0.00   0.00   0.00     0.00   0.00   0.00     0.00   0.00   0.00
  11   6     0.00   0.00   0.00     0.00   0.00   0.00     0.00   0.00   0.00
  12   6     0.00   0.00   0.00     0.00   0.00   0.00     0.00   0.00   0.00
  13   6     0.00   0.00   0.00     0.00   0.00   0.00     0.00   0.00   0.00
  14   6    -0.03   0.02   0.00     0.02   0.00   0.00    -0.01  -0.03   0.02
  15   6     0.03  -0.01  -0.01    -0.02   0.00   0.00     0.01   0.03   0.02
  16   6     0.00   0.00   0.00     0.00   0.00   0.00     0.00   0.00   0.00
  17   1     0.00   0.00   0.00     0.00   0.00   0.00     0.00   0.00   0.00
  18   1     0.21  -0.06   0.01     0.42  -0.13   0.02     0.08  -0.02   0.00
  19   1    -0.21   0.07   0.03    -0.42   0.14   0.06    -0.07   0.02   0.01
  20   1     0.01   0.00   0.31     0.02   0.00   0.62     0.00   0.00   0.11
  21   1    -0.01  -0.02   0.00    -0.02  -0.04   0.01     0.00  -0.01   0.00
  22   1     0.01   0.01   0.00     0.02   0.03   0.00     0.00   0.01   0.00
  23   1     0.00   0.01  -0.03     0.00   0.00   0.03     0.00   0.00  -0.08
  24   1     0.00   0.00   0.00     0.00   0.00   0.00     0.00   0.00   0.00
  25   1     0.00   0.00   0.00     0.00   0.00   0.00     0.01   0.00   0.00
  26   1     0.00   0.00   0.00     0.00   0.00   0.00     0.00   0.00   0.01
  27   1     0.00   0.00   0.00     0.00   0.00   0.00     0.00   0.00   0.00
  28   1     0.05  -0.19   0.28     0.00   0.02  -0.14    -0.17   0.40  -0.03
  29   1     0.41  -0.06   0.01    -0.20   0.07   0.02    -0.03  -0.22  -0.14
  30   1    -0.03   0.03  -0.25    -0.05  -0.06   0.14     0.34   0.28  -0.11
  31   1    -0.01   0.12   0.34    -0.03   0.01  -0.16     0.16  -0.40  -0.09
  32   1    -0.46   0.09   0.06     0.23  -0.09  -0.01    -0.01   0.25  -0.12
  33   1    -0.04  -0.02  -0.29     0.08   0.06   0.17    -0.36  -0.27  -0.13
  34   1     0.00   0.00   0.00     0.00   0.00   0.00     0.00   0.00   0.00
                    70                     71                     72
                     A                      A                      A
 Frequencies --  1512.3709              1517.6468              1526.9062
 Red. masses --     1.0469                 1.0525                 1.0737
 Frc consts  --     1.4109                 1.4283                 1.4749
 IR Inten    --     3.6236                 7.5504                 9.0163
 Atom AN      X      Y      Z        X      Y      Z        X      Y      Z
   1   6     0.00   0.00   0.00     0.01   0.01   0.00     0.00  -0.01   0.00
   2   6     0.00   0.00   0.00     0.00   0.00   0.00     0.01   0.01   0.00
   3   6     0.00   0.00   0.00     0.00   0.00   0.00     0.00   0.00   0.00
   4   8     0.00   0.00   0.00     0.00   0.00   0.00     0.00   0.00   0.00
   5   8    -0.01   0.01   0.00     0.00   0.00   0.00     0.00   0.00   0.00
   6   6     0.01  -0.04   0.00     0.00   0.00   0.00     0.00   0.00   0.00
   7   6     0.03   0.03   0.00     0.00   0.00   0.00     0.00   0.00   0.00
   8   6     0.00   0.00   0.00    -0.01  -0.03   0.00    -0.03   0.02   0.00
   9   6     0.00   0.00   0.00     0.00   0.00   0.00    -0.02   0.00   0.00
  10   6     0.00   0.00   0.00    -0.01  -0.01   0.01     0.01   0.01  -0.01
  11   6     0.00   0.00   0.00    -0.01   0.00  -0.01     0.01   0.00   0.01
  12   6     0.00   0.00   0.00     0.01   0.00   0.00    -0.01   0.00   0.00
  13   6     0.00   0.00   0.00     0.00   0.00   0.01     0.01   0.01  -0.01
  14   6     0.00   0.00   0.00    -0.01  -0.02   0.02    -0.03   0.01   0.00
  15   6     0.00   0.00   0.00    -0.01  -0.02  -0.03    -0.03   0.01   0.01
  16   6     0.00   0.00   0.00    -0.01   0.00  -0.01     0.01   0.00   0.01
  17   1     0.00  -0.01   0.00     0.00  -0.05   0.00     0.02  -0.04   0.00
  18   1    -0.07   0.45  -0.34     0.00   0.00   0.00     0.00  -0.01   0.00
  19   1    -0.03   0.45   0.34     0.00   0.00   0.00     0.00  -0.01   0.00
  20   1    -0.16  -0.24   0.00     0.00   0.00   0.00     0.00   0.00   0.00
  21   1    -0.04  -0.29   0.23     0.00   0.01  -0.01     0.00  -0.01   0.00
  22   1    -0.05  -0.30  -0.22     0.00   0.01   0.01     0.00  -0.01   0.00
  23   1     0.00   0.00   0.00    -0.03   0.01   0.00     0.00  -0.08  -0.01
  24   1     0.00   0.00   0.00     0.03   0.02  -0.01    -0.06  -0.04   0.03
  25   1     0.00   0.00   0.00     0.03   0.01   0.01    -0.06  -0.01  -0.02
  26   1     0.00   0.00   0.00     0.01   0.01  -0.01    -0.01  -0.01   0.01
  27   1     0.00   0.00   0.00     0.03   0.02  -0.01    -0.06  -0.04   0.03
  28   1     0.00   0.01   0.00    -0.16   0.38   0.01     0.04  -0.17   0.36
  29   1     0.00   0.00   0.00     0.05  -0.27  -0.17     0.50  -0.10   0.00
  30   1     0.01   0.00   0.00     0.35   0.30  -0.16     0.00   0.06  -0.34
  31   1     0.00   0.00   0.00    -0.15   0.38   0.10     0.01  -0.12  -0.35
  32   1     0.00   0.00   0.00     0.01  -0.27   0.13     0.44  -0.06  -0.07
  33   1     0.00   0.00   0.00     0.35   0.27   0.13     0.01  -0.01   0.30
  34   1     0.00   0.00   0.00     0.03   0.01   0.01    -0.05  -0.01  -0.02
                    73                     74                     75
                     A                      A                      A
 Frequencies --  1532.7527              1533.0360              1619.7175
 Red. masses --     1.1513                 1.9128                 5.2443
 Frc consts  --     1.5936                 2.6486                 8.1062
 IR Inten    --     8.4454                 7.6682                 1.4033
 Atom AN      X      Y      Z        X      Y      Z        X      Y      Z
   1   6     0.01   0.00   0.00     0.05   0.00   0.00     0.02   0.03   0.02
   2   6     0.00   0.01   0.00    -0.01   0.03   0.00    -0.01  -0.05   0.00
   3   6     0.01  -0.01   0.00    -0.01   0.01   0.00     0.00   0.00   0.00
   4   8     0.00   0.00   0.00     0.00   0.00   0.00     0.00   0.00   0.00
   5   8    -0.01   0.01   0.00     0.00  -0.01   0.00     0.00   0.00   0.00
   6   6    -0.01   0.02   0.00     0.00  -0.01   0.00     0.00   0.00   0.00
   7   6    -0.01   0.07   0.00     0.01  -0.03   0.00     0.00   0.00   0.00
   8   6     0.00  -0.01   0.00     0.01  -0.02   0.00     0.00   0.01   0.00
   9   6    -0.03  -0.01   0.00    -0.12  -0.04   0.00    -0.05   0.11  -0.23
  10   6     0.01   0.02  -0.02     0.04   0.06  -0.07    -0.07  -0.12   0.15
  11   6     0.03   0.00   0.02     0.10  -0.01   0.08    -0.09   0.07  -0.18
  12   6    -0.02  -0.01   0.00    -0.08  -0.03   0.00     0.05  -0.17   0.33
  13   6     0.02   0.02  -0.02     0.08   0.07  -0.07     0.03   0.12  -0.18
  14   6     0.00   0.00   0.00     0.01  -0.01   0.00     0.00   0.00   0.00
  15   6     0.00   0.00   0.00     0.00   0.00   0.00     0.00   0.00   0.00
  16   6     0.02   0.00   0.02     0.06  -0.02   0.07     0.13  -0.04   0.16
  17   1     0.01  -0.04   0.00     0.03  -0.10  -0.01    -0.03   0.02  -0.03
  18   1     0.02  -0.26   0.20    -0.01   0.13  -0.10     0.00   0.00   0.00
  19   1     0.01  -0.26  -0.20     0.00   0.13   0.10     0.00   0.00   0.00
  20   1     0.10   0.15   0.00    -0.05  -0.08   0.00     0.00   0.00   0.00
  21   1     0.10  -0.45   0.35    -0.05   0.22  -0.17     0.00   0.00   0.00
  22   1     0.08  -0.45  -0.35    -0.04   0.22   0.17     0.00   0.00   0.00
  23   1    -0.01   0.02   0.00    -0.02   0.05   0.00     0.02  -0.04  -0.01
  24   1    -0.09  -0.06   0.04    -0.32  -0.19   0.12     0.28   0.14  -0.04
  25   1    -0.11  -0.02  -0.04    -0.37  -0.06  -0.15     0.20   0.11  -0.05
  26   1    -0.03  -0.01   0.00    -0.10  -0.04   0.01    -0.09   0.24  -0.47
  27   1    -0.09  -0.06   0.04    -0.31  -0.20   0.14    -0.23  -0.06  -0.05
  28   1    -0.01   0.03  -0.03    -0.03   0.09  -0.08     0.00   0.00   0.00
  29   1    -0.04   0.00  -0.01    -0.12   0.00  -0.01     0.01   0.00   0.00
  30   1     0.02   0.01   0.03     0.05   0.02   0.08     0.00   0.00  -0.01
  31   1    -0.01   0.03   0.03    -0.02   0.06   0.08     0.01  -0.01  -0.01
  32   1    -0.04   0.00   0.01    -0.10   0.00   0.02     0.01   0.01  -0.01
  33   1     0.01   0.01  -0.03     0.03   0.03  -0.07    -0.01  -0.01   0.01
  34   1    -0.10  -0.02  -0.04    -0.33  -0.06  -0.12    -0.30  -0.09  -0.06
                    76                     77                     78
                     A                      A                      A
 Frequencies --  1646.7022              1679.0609              1754.9826
 Red. masses --     5.4230                 7.4862                12.3970
 Frc consts  --     8.6640                12.4350                22.4964
 IR Inten    --     0.9642                15.1910               304.1926
 Atom AN      X      Y      Z        X      Y      Z        X      Y      Z
   1   6    -0.03   0.04   0.00    -0.14  -0.50  -0.01     0.00  -0.12   0.00
   2   6     0.00  -0.06   0.00     0.03   0.53   0.03     0.02   0.03   0.00
   3   6    -0.01  -0.01   0.00     0.01  -0.05   0.00     0.08   0.80   0.00
   4   8     0.00   0.01   0.00     0.00   0.07   0.00    -0.07  -0.51   0.00
   5   8     0.00   0.00   0.00     0.00  -0.01   0.00    -0.01  -0.05   0.00
   6   6     0.00   0.00   0.00     0.00   0.00   0.00     0.01  -0.01   0.00
   7   6     0.00   0.00   0.00     0.01   0.00   0.00    -0.02   0.03   0.00
   8   6     0.00   0.01   0.00     0.02  -0.10  -0.01     0.00   0.00   0.00
   9   6     0.20   0.07   0.01     0.08   0.08  -0.04     0.02   0.03  -0.01
  10   6    -0.26  -0.14   0.06    -0.02  -0.03   0.03    -0.01  -0.01   0.01
  11   6     0.27   0.07   0.07     0.00   0.01  -0.02     0.00   0.00   0.00
  12   6    -0.13  -0.05   0.00     0.00  -0.02   0.03     0.00   0.00   0.01
  13   6     0.24   0.13  -0.06     0.02   0.02  -0.02     0.01   0.01  -0.01
  14   6     0.00   0.00   0.00     0.00  -0.01  -0.01     0.00   0.00   0.00
  15   6     0.00   0.00   0.00     0.00  -0.01   0.01     0.00   0.00   0.00
  16   6    -0.28  -0.06  -0.08    -0.03  -0.02   0.00    -0.02  -0.01   0.00
  17   1    -0.05   0.10   0.01     0.33  -0.41  -0.04     0.05  -0.04   0.00
  18   1     0.00   0.00   0.00     0.00   0.00   0.00    -0.03  -0.02   0.01
  19   1     0.00   0.00   0.00     0.00   0.00   0.00    -0.03  -0.02  -0.01
  20   1     0.00   0.00   0.00     0.00   0.00   0.00     0.05   0.05   0.00
  21   1     0.00   0.00   0.00    -0.02   0.01   0.00     0.14  -0.01   0.04
  22   1     0.00   0.00   0.00    -0.02   0.01   0.01     0.14  -0.01  -0.05
  23   1     0.02  -0.04  -0.01    -0.12   0.29   0.03    -0.01   0.04   0.01
  24   1     0.25   0.23  -0.24     0.06   0.04  -0.01    -0.01   0.03   0.01
  25   1    -0.27   0.02  -0.21     0.02   0.01  -0.01    -0.01   0.00   0.00
  26   1    -0.15  -0.05  -0.01    -0.01   0.01  -0.02    -0.01   0.00   0.00
  27   1    -0.19  -0.19   0.20    -0.04  -0.02   0.02    -0.01  -0.01   0.01
  28   1     0.00  -0.01   0.00    -0.03   0.04   0.01     0.00   0.00   0.00
  29   1     0.01   0.00   0.00    -0.03   0.02   0.01     0.00   0.00   0.00
  30   1    -0.01   0.00  -0.01     0.05   0.02   0.06     0.01   0.00   0.01
  31   1     0.00  -0.01   0.00    -0.03   0.04   0.00     0.00   0.00   0.00
  32   1     0.01   0.00   0.00    -0.03   0.02   0.00     0.00   0.00   0.00
  33   1    -0.01  -0.01   0.01     0.04   0.03  -0.06     0.01   0.00  -0.01
  34   1     0.32   0.00   0.23     0.03   0.01   0.05     0.03   0.01   0.03
                    79                     80                     81
                     A                      A                      A
 Frequencies --  3021.3261              3025.4379              3039.3295
 Red. masses --     1.0357                 1.0366                 1.0358
 Frc consts  --     5.5704                 5.5902                 5.6372
 IR Inten    --    27.3644                42.6832                22.1652
 Atom AN      X      Y      Z        X      Y      Z        X      Y      Z
   1   6     0.00   0.00   0.00     0.00   0.00   0.00     0.00   0.00   0.00
   2   6     0.00   0.00   0.00     0.00   0.00   0.00     0.00   0.00   0.00
   3   6     0.00   0.00   0.00     0.00   0.00   0.00     0.00   0.00   0.00
   4   8     0.00   0.00   0.00     0.00   0.00   0.00     0.00   0.00   0.00
   5   8     0.00   0.00   0.00     0.00   0.00   0.00     0.00   0.00   0.00
   6   6     0.00   0.00   0.00     0.00   0.00   0.00    -0.04  -0.02   0.00
   7   6     0.00   0.00   0.00     0.00   0.00   0.00     0.00   0.00   0.00
   8   6     0.00   0.00   0.00     0.01   0.00   0.00     0.00   0.00   0.00
   9   6     0.00   0.00   0.00     0.00   0.00   0.00     0.00   0.00   0.00
  10   6     0.00   0.00   0.00     0.00   0.00   0.00     0.00   0.00   0.00
  11   6     0.00   0.00   0.00     0.00   0.00   0.00     0.00   0.00   0.00
  12   6     0.00   0.00   0.00     0.00   0.00   0.00     0.00   0.00   0.00
  13   6     0.00   0.00   0.00     0.00   0.00   0.00     0.00   0.00   0.00
  14   6     0.01   0.02   0.02    -0.01  -0.02  -0.03     0.00   0.00   0.00
  15   6    -0.01  -0.03   0.02    -0.01  -0.02   0.02     0.00   0.00   0.00
  16   6     0.00   0.00   0.00     0.00   0.00   0.00     0.00   0.00   0.00
  17   1     0.00   0.00   0.00    -0.01  -0.01   0.00     0.00   0.00   0.00
  18   1     0.00   0.00   0.00     0.00   0.00   0.00     0.04   0.32   0.46
  19   1     0.00   0.00   0.00     0.00   0.00   0.00     0.01   0.32  -0.46
  20   1     0.00   0.00   0.00     0.00   0.00   0.00     0.48  -0.38  -0.02
  21   1     0.00   0.00   0.00     0.00   0.00   0.00     0.00   0.01   0.01
  22   1     0.00   0.00   0.00     0.00   0.00   0.00     0.00   0.01  -0.02
  23   1     0.00   0.00   0.00    -0.06  -0.03   0.00     0.00   0.00   0.00
  24   1     0.00   0.00   0.00     0.00   0.00   0.00     0.00   0.00   0.00
  25   1     0.00   0.00   0.00     0.00   0.00   0.00     0.00   0.00   0.00
  26   1     0.00   0.00   0.00     0.00   0.00   0.00     0.00   0.00   0.00
  27   1     0.00   0.00   0.00     0.00   0.00   0.00     0.00   0.00   0.00
  28   1    -0.45  -0.17   0.00     0.45   0.17   0.01     0.00   0.00   0.00
  29   1     0.04   0.20  -0.26    -0.04  -0.20   0.26     0.00   0.00   0.00
  30   1     0.26  -0.30  -0.03    -0.25   0.30   0.03     0.00   0.00   0.00
  31   1     0.44   0.17  -0.02     0.44   0.17  -0.03     0.00   0.00   0.00
  32   1    -0.07  -0.17  -0.29    -0.07  -0.17  -0.29     0.00   0.00   0.00
  33   1    -0.26   0.31   0.04    -0.25   0.30   0.04     0.00   0.00   0.00
  34   1     0.00   0.00   0.00     0.00   0.00   0.00     0.00   0.00   0.00
                    82                     83                     84
                     A                      A                      A
 Frequencies --  3058.9041              3060.2571              3080.8221
 Red. masses --     1.0587                 1.0865                 1.1019
 Frc consts  --     5.8365                 5.9951                 6.1623
 IR Inten    --    17.7524                 1.4695                 1.3078
 Atom AN      X      Y      Z        X      Y      Z        X      Y      Z
   1   6     0.00   0.00   0.00     0.00   0.00   0.00     0.00   0.00   0.00
   2   6     0.00   0.00   0.00     0.00   0.00   0.00     0.00   0.00   0.00
   3   6     0.00   0.00   0.00     0.00   0.00   0.00     0.00   0.00   0.00
   4   8     0.00   0.00   0.00     0.00   0.00   0.00     0.00   0.00   0.00
   5   8     0.00   0.00   0.00     0.00   0.00   0.00     0.00   0.00   0.00
   6   6    -0.01   0.01   0.00     0.00   0.00   0.00     0.00   0.00   0.00
   7   6    -0.01  -0.07   0.00     0.00   0.00   0.00     0.00   0.00   0.00
   8   6     0.00   0.00   0.00    -0.07  -0.02   0.00     0.00   0.00   0.00
   9   6     0.00   0.00   0.00     0.00   0.00   0.00     0.00   0.00   0.00
  10   6     0.00   0.00   0.00     0.00   0.00   0.00     0.00   0.00   0.00
  11   6     0.00   0.00   0.00     0.00   0.00   0.00     0.00   0.00   0.00
  12   6     0.00   0.00   0.00     0.00   0.00   0.00     0.00   0.00   0.00
  13   6     0.00   0.00   0.00     0.00   0.00   0.00     0.00   0.00   0.00
  14   6     0.00   0.00   0.00     0.03   0.00  -0.01    -0.06   0.01   0.01
  15   6     0.00   0.00   0.00     0.03   0.00   0.01     0.06  -0.01   0.00
  16   6     0.00   0.00   0.00     0.00   0.00   0.00     0.00   0.00   0.00
  17   1     0.00   0.00   0.00    -0.05  -0.02   0.00     0.00   0.00   0.00
  18   1    -0.01  -0.04  -0.07     0.00   0.00   0.00     0.00   0.00   0.00
  19   1     0.00  -0.04   0.07     0.00   0.00   0.00     0.00   0.00   0.00
  20   1     0.08  -0.07   0.00     0.00   0.00   0.00     0.00   0.00   0.00
  21   1     0.07   0.39   0.56     0.00   0.01   0.01     0.00   0.00   0.00
  22   1     0.03   0.40  -0.58     0.00   0.01  -0.01     0.00   0.00   0.00
  23   1    -0.01  -0.01   0.00     0.81   0.30  -0.02     0.00   0.00   0.00
  24   1     0.00   0.00   0.00     0.00   0.00   0.00     0.00   0.00   0.00
  25   1     0.00   0.00   0.00     0.00   0.00   0.00     0.00   0.00   0.00
  26   1     0.00   0.00   0.00     0.00   0.00   0.00     0.00   0.00   0.00
  27   1     0.00   0.00   0.00     0.00   0.00   0.00     0.00   0.00   0.00
  28   1     0.00   0.00   0.00    -0.20  -0.08   0.00     0.45   0.18   0.01
  29   1     0.00   0.00   0.00    -0.01  -0.10   0.13     0.00   0.08  -0.11
  30   1     0.00   0.00   0.00    -0.14   0.17   0.01     0.30  -0.38  -0.04
  31   1     0.00   0.00   0.00    -0.21  -0.08   0.01    -0.47  -0.19   0.03
  32   1     0.00   0.00   0.00    -0.03  -0.08  -0.14    -0.02  -0.08  -0.13
  33   1     0.00   0.00   0.00    -0.13   0.17   0.02    -0.29   0.37   0.05
  34   1     0.00   0.00   0.00     0.00   0.00   0.00     0.00   0.00   0.00
                    85                     86                     87
                     A                      A                      A
 Frequencies --  3091.0291              3092.4539              3094.6593
 Red. masses --     1.1068                 1.0988                 1.1022
 Frc consts  --     6.2305                 6.1913                 6.2191
 IR Inten    --     0.7329                70.8738                27.4709
 Atom AN      X      Y      Z        X      Y      Z        X      Y      Z
   1   6     0.00   0.00   0.00     0.00   0.00   0.00     0.00   0.00   0.00
   2   6     0.00   0.00   0.00    -0.01   0.00   0.00     0.00   0.00   0.00
   3   6     0.00   0.00   0.00     0.00   0.00   0.00     0.00   0.00   0.00
   4   8     0.00   0.00   0.00     0.00   0.00   0.00     0.00   0.00   0.00
   5   8     0.00   0.00   0.00     0.00   0.00   0.00     0.00   0.00   0.00
   6   6     0.00   0.00  -0.06     0.00   0.00   0.00     0.00   0.00   0.00
   7   6     0.00   0.00   0.08     0.00   0.00   0.00     0.00   0.00   0.00
   8   6     0.00   0.00   0.00     0.04   0.01   0.00     0.01   0.00   0.00
   9   6     0.00   0.00   0.00     0.00   0.00   0.00     0.00   0.00   0.00
  10   6     0.00   0.00   0.00     0.00   0.00   0.00     0.00   0.00   0.00
  11   6     0.00   0.00   0.00     0.00   0.00   0.00     0.00   0.00   0.00
  12   6     0.00   0.00   0.00     0.00   0.00   0.00     0.00   0.00   0.00
  13   6     0.00   0.00   0.00     0.00   0.00   0.00     0.00   0.00   0.00
  14   6     0.00   0.00   0.00     0.05  -0.02   0.00     0.00  -0.03   0.02
  15   6     0.00   0.00   0.00     0.05  -0.02  -0.01     0.01   0.06   0.06
  16   6     0.00   0.00   0.00     0.00   0.00   0.00     0.00   0.00   0.00
  17   1     0.00   0.00   0.00     0.06   0.02   0.00     0.01   0.00   0.00
  18   1     0.03   0.25   0.35     0.00   0.00   0.00     0.00   0.00   0.00
  19   1    -0.01  -0.25   0.34     0.00   0.00  -0.01     0.00   0.00   0.00
  20   1    -0.01   0.01  -0.01    -0.01   0.01   0.00     0.00   0.00   0.00
  21   1    -0.06  -0.34  -0.46     0.00   0.00   0.00     0.00   0.00   0.00
  22   1     0.03   0.32  -0.45     0.00   0.00   0.00     0.00   0.00   0.00
  23   1     0.00   0.00   0.00    -0.42  -0.16   0.01    -0.08  -0.03   0.00
  24   1     0.00   0.00   0.00     0.00   0.00   0.00     0.00   0.00   0.00
  25   1     0.00   0.00   0.00     0.00   0.00   0.00     0.00   0.00   0.00
  26   1     0.00   0.00   0.00     0.00   0.00   0.00     0.00   0.00   0.00
  27   1     0.00   0.00   0.00     0.00   0.00   0.00     0.00   0.00   0.00
  28   1     0.00   0.00   0.00    -0.37  -0.15  -0.01     0.03   0.01   0.00
  29   1     0.00   0.00   0.00     0.02   0.02  -0.03     0.03   0.16  -0.22
  30   1     0.00   0.00   0.00    -0.31   0.38   0.04    -0.11   0.13   0.02
  31   1     0.00   0.00   0.00    -0.38  -0.16   0.03    -0.21  -0.07   0.03
  32   1     0.00   0.00   0.00     0.01   0.00   0.01    -0.17  -0.38  -0.69
  33   1     0.00   0.00   0.00    -0.29   0.37   0.04     0.28  -0.32  -0.03
  34   1     0.00   0.00   0.00     0.00   0.00   0.00     0.00  -0.01   0.01
                    88                     89                     90
                     A                      A                      A
 Frequencies --  3098.3404              3103.6656              3117.6590
 Red. masses --     1.1015                 1.1004                 1.1062
 Frc consts  --     6.2298                 6.2455                 6.3349
 IR Inten    --    36.7801                33.6015                47.4422
 Atom AN      X      Y      Z        X      Y      Z        X      Y      Z
   1   6     0.00   0.00   0.00     0.00   0.00   0.00     0.00   0.00   0.00
   2   6     0.00   0.00   0.00     0.00   0.00   0.00     0.00   0.00   0.00
   3   6     0.00   0.00   0.00     0.00   0.00   0.00     0.00   0.00   0.00
   4   8     0.00   0.00   0.00     0.00   0.00   0.00     0.00   0.00   0.00
   5   8     0.00   0.00   0.00     0.00   0.00   0.00     0.00   0.00   0.00
   6   6     0.00   0.00   0.00    -0.05   0.08   0.00     0.00   0.00   0.07
   7   6     0.00   0.00   0.00     0.00   0.01   0.00     0.00   0.00   0.06
   8   6     0.02   0.01   0.00     0.00   0.00   0.00     0.00   0.00   0.00
   9   6     0.00   0.00   0.00     0.00   0.00   0.00     0.00   0.00   0.00
  10   6     0.00   0.00   0.00     0.00   0.00   0.00     0.00   0.00   0.00
  11   6     0.00   0.00   0.00     0.00   0.00   0.00     0.00   0.00   0.00
  12   6     0.00   0.00   0.00     0.00   0.00   0.00     0.00   0.00   0.00
  13   6     0.00   0.00   0.00     0.00   0.00   0.00     0.00   0.00   0.00
  14   6     0.01   0.07  -0.05     0.00   0.00   0.00     0.00   0.00   0.00
  15   6     0.01   0.02   0.02     0.00   0.00   0.00     0.00   0.00   0.00
  16   6     0.00   0.00   0.00     0.00   0.00   0.00     0.00   0.00   0.00
  17   1     0.03   0.01   0.00     0.00   0.00   0.00     0.00   0.00   0.00
  18   1     0.00   0.00   0.00    -0.04  -0.23  -0.35    -0.05  -0.33  -0.45
  19   1     0.00   0.00   0.00    -0.02  -0.24   0.35     0.01   0.33  -0.46
  20   1    -0.01   0.00   0.00     0.62  -0.47  -0.02     0.00   0.00   0.01
  21   1     0.00   0.00   0.00    -0.01  -0.07  -0.10    -0.05  -0.25  -0.34
  22   1     0.00   0.00   0.00    -0.01  -0.06   0.09     0.03   0.24  -0.34
  23   1    -0.18  -0.07   0.00    -0.01   0.00   0.00     0.00   0.00   0.00
  24   1     0.00   0.00   0.00     0.00   0.00   0.00     0.00   0.00   0.00
  25   1     0.00   0.00   0.00     0.00   0.00   0.00     0.00   0.00   0.00
  26   1     0.00   0.00   0.00     0.00   0.00   0.00     0.00   0.00   0.00
  27   1     0.00   0.00   0.00     0.00   0.00   0.00     0.00   0.00   0.00
  28   1    -0.26  -0.09  -0.02    -0.01   0.00   0.00     0.00   0.00   0.00
  29   1    -0.10  -0.48   0.64     0.00   0.00   0.00     0.00   0.00   0.00
  30   1     0.24  -0.27  -0.04     0.00   0.00   0.00     0.00   0.00   0.00
  31   1    -0.13  -0.05   0.01    -0.01   0.00   0.00     0.00   0.00   0.00
  32   1    -0.05  -0.12  -0.22     0.00   0.00   0.00     0.00   0.00   0.00
  33   1     0.06  -0.06   0.00     0.00   0.00   0.00     0.00   0.00   0.00
  34   1     0.00   0.00   0.00     0.00   0.00   0.00     0.00   0.00   0.00
                    91                     92                     93
                     A                      A                      A
 Frequencies --  3156.0172              3158.0488              3166.1316
 Red. masses --     1.0874                 1.0853                 1.0879
 Frc consts  --     6.3812                 6.3775                 6.4254
 IR Inten    --     8.1803                 1.0167                 3.2294
 Atom AN      X      Y      Z        X      Y      Z        X      Y      Z
   1   6     0.00   0.00   0.00     0.00   0.00   0.00     0.00   0.00   0.00
   2   6    -0.08  -0.03   0.00     0.00   0.00   0.00     0.00   0.00   0.00
   3   6     0.00   0.00   0.00     0.00   0.00   0.00     0.00   0.00   0.00
   4   8     0.00   0.00   0.00     0.00   0.00   0.00     0.00   0.00   0.00
   5   8     0.00   0.00   0.00     0.00   0.00   0.00     0.00   0.00   0.00
   6   6     0.00   0.00   0.00     0.00   0.00   0.00     0.00   0.00   0.00
   7   6     0.00   0.00   0.00     0.00   0.00   0.00     0.00   0.00   0.00
   8   6    -0.01   0.00   0.00     0.00   0.00   0.00     0.00   0.00   0.00
   9   6     0.00   0.00   0.00     0.00   0.00   0.00     0.00   0.00   0.00
  10   6     0.00   0.00   0.00     0.01   0.00   0.01     0.01  -0.01   0.02
  11   6     0.00   0.00   0.00     0.01   0.02  -0.03     0.02   0.03  -0.04
  12   6     0.00   0.00   0.00    -0.04  -0.02   0.00    -0.02  -0.01   0.00
  13   6     0.00   0.00   0.00     0.03  -0.01   0.04    -0.02   0.01  -0.03
  14   6     0.00   0.00   0.00     0.00   0.00   0.00     0.00   0.00   0.00
  15   6     0.00   0.00   0.00     0.00   0.00   0.00     0.00   0.00   0.00
  16   6     0.00   0.00   0.00     0.01   0.02  -0.02    -0.01  -0.02   0.03
  17   1     0.96   0.26   0.00     0.03   0.01   0.00    -0.01   0.00   0.00
  18   1     0.00   0.00   0.00     0.00   0.00   0.00     0.00   0.00   0.00
  19   1     0.00   0.00   0.00     0.00   0.00   0.00     0.00   0.00   0.00
  20   1     0.00   0.00   0.00     0.00   0.00   0.00     0.00   0.00   0.00
  21   1     0.00   0.00   0.00     0.00   0.00   0.00     0.00   0.00   0.00
  22   1     0.00   0.00   0.00     0.00   0.00   0.00     0.00   0.00   0.00
  23   1     0.08   0.03   0.00     0.01   0.00   0.00    -0.01   0.00   0.00
  24   1     0.00   0.00   0.00    -0.09   0.03  -0.11    -0.18   0.07  -0.23
  25   1     0.00   0.01  -0.01    -0.14  -0.24   0.31    -0.21  -0.36   0.48
  26   1    -0.01  -0.01   0.00     0.52   0.20   0.01     0.22   0.09   0.00
  27   1     0.01  -0.01   0.02    -0.36   0.12  -0.47     0.25  -0.09   0.33
  28   1     0.03   0.01   0.00     0.00   0.00   0.00     0.00   0.00   0.00
  29   1     0.00   0.00  -0.01     0.00   0.00   0.00     0.00   0.00   0.00
  30   1     0.00   0.00   0.00     0.00   0.00   0.00     0.00   0.00   0.00
  31   1     0.03   0.01   0.00     0.00   0.00   0.00     0.00   0.00   0.00
  32   1     0.00   0.00   0.01     0.00   0.00   0.00     0.00   0.00  -0.01
  33   1     0.00   0.00   0.00     0.00   0.00   0.00     0.00   0.00   0.00
  34   1     0.01   0.01  -0.02    -0.12  -0.20   0.27     0.17   0.28  -0.39
                    94                     95                     96
                     A                      A                      A
 Frequencies --  3176.0388              3184.0879              3191.4193
 Red. masses --     1.0917                 1.0944                 1.0968
 Frc consts  --     6.4882                 6.5372                 6.5817
 IR Inten    --    28.5510                34.4758                10.9571
 Atom AN      X      Y      Z        X      Y      Z        X      Y      Z
   1   6     0.00   0.00   0.00     0.00   0.00   0.00     0.00   0.00   0.00
   2   6     0.00   0.00   0.00     0.00   0.00   0.00     0.00   0.00   0.00
   3   6     0.00   0.00   0.00     0.00   0.00   0.00     0.00   0.00   0.00
   4   8     0.00   0.00   0.00     0.00   0.00   0.00     0.00   0.00   0.00
   5   8     0.00   0.00   0.00     0.00   0.00   0.00     0.00   0.00   0.00
   6   6     0.00   0.00   0.00     0.00   0.00   0.00     0.00   0.00   0.00
   7   6     0.00   0.00   0.00     0.00   0.00   0.00     0.00   0.00   0.00
   8   6     0.00   0.00   0.00     0.00   0.00   0.00     0.00   0.00   0.00
   9   6     0.00   0.00   0.00     0.00   0.00   0.00     0.00   0.00   0.00
  10   6    -0.02   0.01  -0.02     0.03  -0.01   0.04    -0.04   0.01  -0.04
  11   6    -0.01  -0.02   0.03     0.00   0.00   0.00     0.02   0.03  -0.04
  12   6    -0.04  -0.02   0.00     0.03   0.01   0.00     0.04   0.01   0.00
  13   6     0.01   0.00   0.01     0.03  -0.01   0.04     0.02  -0.01   0.02
  14   6     0.00   0.00   0.00     0.00   0.00   0.00     0.00   0.00   0.00
  15   6     0.00   0.00   0.00     0.00   0.00   0.00     0.00   0.00   0.00
  16   6    -0.02  -0.03   0.04    -0.01  -0.02   0.03    -0.01  -0.01   0.01
  17   1     0.00   0.00   0.00     0.00   0.00   0.00     0.00   0.00   0.00
  18   1     0.00   0.00   0.00     0.00   0.00   0.00     0.00   0.00   0.00
  19   1     0.00   0.00   0.00     0.00   0.00   0.00     0.00   0.00   0.00
  20   1     0.00   0.00   0.00     0.00   0.00   0.00     0.00   0.00   0.00
  21   1     0.00   0.00   0.00     0.00   0.00   0.00     0.00   0.00   0.00
  22   1     0.00   0.00   0.00     0.00   0.00   0.00     0.00   0.00   0.00
  23   1    -0.01   0.00   0.00     0.00   0.00   0.00     0.00   0.00   0.00
  24   1     0.21  -0.08   0.27    -0.35   0.13  -0.44     0.40  -0.15   0.50
  25   1     0.12   0.21  -0.28     0.03   0.04  -0.05    -0.17  -0.29   0.39
  26   1     0.49   0.19   0.01    -0.39  -0.15   0.00    -0.39  -0.15  -0.01
  27   1    -0.14   0.04  -0.18    -0.33   0.11  -0.43    -0.17   0.06  -0.23
  28   1     0.00   0.00   0.00     0.00   0.00   0.00     0.00   0.00   0.00
  29   1     0.00   0.00   0.00     0.00   0.00   0.00     0.00   0.00   0.00
  30   1     0.00   0.00   0.00     0.00   0.00   0.00     0.00   0.00   0.00
  31   1     0.00   0.00   0.00     0.00   0.00   0.00     0.00   0.00   0.00
  32   1     0.00   0.00  -0.01     0.00   0.00   0.00     0.00   0.00   0.00
  33   1     0.00   0.00   0.00     0.00   0.00   0.00     0.00   0.00   0.00
  34   1     0.21   0.35  -0.48     0.14   0.23  -0.32     0.06   0.10  -0.14

 -------------------
 - Thermochemistry -
 -------------------
 Temperature   298.150 Kelvin.  Pressure   1.00000 Atm.
 Atom  1 has atomic number  6 and mass  12.00000
 Atom  2 has atomic number  6 and mass  12.00000
 Atom  3 has atomic number  6 and mass  12.00000
 Atom  4 has atomic number  8 and mass  15.99491
 Atom  5 has atomic number  8 and mass  15.99491
 Atom  6 has atomic number  6 and mass  12.00000
 Atom  7 has atomic number  6 and mass  12.00000
 Atom  8 has atomic number  6 and mass  12.00000
 Atom  9 has atomic number  6 and mass  12.00000
 Atom 10 has atomic number  6 and mass  12.00000
 Atom 11 has atomic number  6 and mass  12.00000
 Atom 12 has atomic number  6 and mass  12.00000
 Atom 13 has atomic number  6 and mass  12.00000
 Atom 14 has atomic number  6 and mass  12.00000
 Atom 15 has atomic number  6 and mass  12.00000
 Atom 16 has atomic number  6 and mass  12.00000
 Atom 17 has atomic number  1 and mass   1.00783
 Atom 18 has atomic number  1 and mass   1.00783
 Atom 19 has atomic number  1 and mass   1.00783
 Atom 20 has atomic number  1 and mass   1.00783
 Atom 21 has atomic number  1 and mass   1.00783
 Atom 22 has atomic number  1 and mass   1.00783
 Atom 23 has atomic number  1 and mass   1.00783
 Atom 24 has atomic number  1 and mass   1.00783
 Atom 25 has atomic number  1 and mass   1.00783
 Atom 26 has atomic number  1 and mass   1.00783
 Atom 27 has atomic number  1 and mass   1.00783
 Atom 28 has atomic number  1 and mass   1.00783
 Atom 29 has atomic number  1 and mass   1.00783
 Atom 30 has atomic number  1 and mass   1.00783
 Atom 31 has atomic number  1 and mass   1.00783
 Atom 32 has atomic number  1 and mass   1.00783
 Atom 33 has atomic number  1 and mass   1.00783
 Atom 34 has atomic number  1 and mass   1.00783
 Molecular mass:   218.13068 amu.
 Principal axes and moments of inertia in atomic units:
                           1         2         3
     EIGENVALUES --  2917.594945062.817567060.69827
           X            0.99995  -0.00969   0.00013
           Y            0.00969   0.99995  -0.00273
           Z           -0.00010   0.00273   1.00000
 This molecule is an asymmetric top.
 Rotational symmetry number  1.
 Warning -- assumption of classical behavior for rotation
           may cause significant error
 Rotational temperatures (Kelvin)      0.02969     0.01711     0.01227
 Rotational constants (GHZ):           0.61857     0.35647     0.25560
 Zero-point vibrational energy     758138.0 (Joules/Mol)
                                  181.19932 (Kcal/Mol)
 Warning -- explicit consideration of  24 degrees of freedom as
           vibrations may cause significant error
 Vibrational temperatures:     36.75    48.31    69.15    97.20   107.27
          (Kelvin)            119.91   128.82   186.47   256.80   271.77
                              318.46   357.37   360.61   378.54   403.35
                              499.96   539.25   581.84   594.07   597.62
                              648.84   716.61   840.19   864.19   915.78
                             1015.55  1029.41  1111.41  1135.70  1160.00
                             1176.90  1224.82  1244.32  1274.55  1332.51
                             1353.10  1371.78  1385.30  1394.80  1398.58
                             1428.08  1436.51  1466.14  1511.49  1532.16
                             1586.63  1602.25  1639.68  1679.83  1704.30
                             1704.65  1717.31  1725.42  1738.37  1833.23
                             1883.50  1895.52  1939.17  1947.10  1959.03
                             2025.67  2027.18  2027.90  2062.08  2066.98
                             2125.92  2163.97  2164.54  2165.55  2175.96
                             2183.55  2196.87  2205.29  2205.69  2330.41
                             2369.23  2415.79  2525.03  4347.01  4352.93
                             4372.91  4401.08  4403.02  4432.61  4447.30
                             4449.35  4452.52  4457.82  4465.48  4485.61
                             4540.80  4543.72  4555.35  4569.61  4581.19
                             4591.73
 
 Zero-point correction=                           0.288759 (Hartree/Particle)
 Thermal correction to Energy=                    0.305588
 Thermal correction to Enthalpy=                  0.306532
 Thermal correction to Gibbs Free Energy=         0.242323
 Sum of electronic and zero-point Energies=           -694.662883
 Sum of electronic and thermal Energies=              -694.646055
 Sum of electronic and thermal Enthalpies=            -694.645111
 Sum of electronic and thermal Free Energies=         -694.709320
 
                     E (Thermal)             CV                S
                      KCal/Mol        Cal/Mol-Kelvin    Cal/Mol-Kelvin
 Total                  191.759             61.717            135.139
 Electronic               0.000              0.000              0.000
 Translational            0.889              2.981             42.043
 Rotational               0.889              2.981             33.011
 Vibrational            189.982             55.756             60.085
 Vibration  1             0.593              1.985              6.149
 Vibration  2             0.594              1.983              5.606
 Vibration  3             0.595              1.978              4.896
 Vibration  4             0.598              1.970              4.223
 Vibration  5             0.599              1.966              4.029
 Vibration  6             0.600              1.961              3.811
 Vibration  7             0.602              1.957              3.670
 Vibration  8             0.612              1.924              2.952
 Vibration  9             0.629              1.869              2.344
 Vibration 10             0.633              1.855              2.239
 Vibration 11             0.648              1.809              1.948
 Vibration 12             0.662              1.765              1.742
 Vibration 13             0.663              1.762              1.726
 Vibration 14             0.670              1.740              1.641
 Vibration 15             0.680              1.710              1.532
 Vibration 16             0.725              1.580              1.178
 Vibration 17             0.746              1.524              1.060
 Vibration 18             0.770              1.461              0.947
 Vibration 19             0.777              1.442              0.916
 Vibration 20             0.779              1.437              0.908
 Vibration 21             0.810              1.359              0.793
 Vibration 22             0.854              1.254              0.663
 Vibration 23             0.941              1.066              0.478
 Vibration 24             0.959              1.030              0.449
                       Q            Log10(Q)             Ln(Q)
 Total Bot       0.346246-111       -111.460615       -256.647550
 Total V=0       0.228695D+22         21.359257         49.181506
 Vib (Bot)       0.747956-126       -126.126124       -290.416133
 Vib (Bot)  1    0.810763D+01          0.908894          2.092806
 Vib (Bot)  2    0.616474D+01          0.789915          1.818845
 Vib (Bot)  3    0.430178D+01          0.633649          1.459030
 Vib (Bot)  4    0.305369D+01          0.484826          1.116352
 Vib (Bot)  5    0.276453D+01          0.441621          1.016871
 Vib (Bot)  6    0.246972D+01          0.392648          0.904106
 Vib (Bot)  7    0.229649D+01          0.361064          0.831380
 Vib (Bot)  8    0.157314D+01          0.196766          0.453071
 Vib (Bot)  9    0.112589D+01          0.051498          0.118578
 Vib (Bot) 10    0.106000D+01          0.025304          0.058265
 Vib (Bot) 11    0.893160D+00         -0.049071         -0.112989
 Vib (Bot) 12    0.786359D+00         -0.104379         -0.240342
 Vib (Bot) 13    0.778473D+00         -0.108757         -0.250421
 Vib (Bot) 14    0.737108D+00         -0.132469         -0.305021
 Vib (Bot) 15    0.685690D+00         -0.163872         -0.377330
 Vib (Bot) 16    0.531814D+00         -0.274240         -0.631461
 Vib (Bot) 17    0.484151D+00         -0.315019         -0.725358
 Vib (Bot) 18    0.439320D+00         -0.357219         -0.822526
 Vib (Bot) 19    0.427555D+00         -0.369008         -0.849672
 Vib (Bot) 20    0.424223D+00         -0.372406         -0.857496
 Vib (Bot) 21    0.379971D+00         -0.420250         -0.967660
 Vib (Bot) 22    0.330548D+00         -0.480766         -1.107004
 Vib (Bot) 23    0.259907D+00         -0.585182         -1.347431
 Vib (Bot) 24    0.248437D+00         -0.604784         -1.392566
 Vib (V=0)       0.494023D+07          6.693748         15.412923
 Vib (V=0)  1    0.862304D+01          0.935660          2.154437
 Vib (V=0)  2    0.668498D+01          0.825100          1.899863
 Vib (V=0)  3    0.483075D+01          0.684014          1.575001
 Vib (V=0)  4    0.359436D+01          0.555621          1.279365
 Vib (V=0)  5    0.330938D+01          0.519747          1.196762
 Vib (V=0)  6    0.301983D+01          0.479982          1.105200
 Vib (V=0)  7    0.285029D+01          0.454888          1.047419
 Vib (V=0)  8    0.215068D+01          0.332577          0.765786
 Vib (V=0)  9    0.173192D+01          0.238529          0.549233
 Vib (V=0) 10    0.167200D+01          0.223237          0.514023
 Vib (V=0) 11    0.152359D+01          0.182868          0.421069
 Vib (V=0) 12    0.143186D+01          0.155900          0.358973
 Vib (V=0) 13    0.142521D+01          0.153880          0.354321
 Vib (V=0) 14    0.139069D+01          0.143230          0.329800
 Vib (V=0) 15    0.134863D+01          0.129892          0.299088
 Vib (V=0) 16    0.122995D+01          0.089887          0.206973
 Vib (V=0) 17    0.119599D+01          0.077728          0.178975
 Vib (V=0) 18    0.116558D+01          0.066544          0.153222
 Vib (V=0) 19    0.115788D+01          0.063663          0.146589
 Vib (V=0) 20    0.115572D+01          0.062852          0.144721
 Vib (V=0) 21    0.112800D+01          0.052307          0.120442
 Vib (V=0) 22    0.109938D+01          0.041150          0.094751
 Vib (V=0) 23    0.106352D+01          0.026745          0.061582
 Vib (V=0) 24    0.105832D+01          0.024617          0.056683
 Electronic      0.100000D+01          0.000000          0.000000
 Translational   0.126628D+09          8.102530         18.656765
 Rotational      0.365577D+07          6.562979         15.111817
 ***** Axes restored to original set *****
 -------------------------------------------------------------------
 Center     Atomic                   Forces (Hartrees/Bohr)
 Number     Number              X              Y              Z
 -------------------------------------------------------------------
    1          6          -0.000008915    0.000003336   -0.000007429
    2          6           0.000010361   -0.000000503    0.000000980
    3          6          -0.000027497   -0.000013049    0.000003063
    4          8           0.000007959    0.000003043    0.000004416
    5          8           0.000030112    0.000003806   -0.000007897
    6          6           0.000001333    0.000003770   -0.000000650
    7          6          -0.000005975    0.000004984    0.000003866
    8          6          -0.000007731    0.000002237    0.000006970
    9          6           0.000007981    0.000001021   -0.000000935
   10          6           0.000006535   -0.000004743    0.000012447
   11          6          -0.000000687   -0.000003578    0.000002558
   12          6          -0.000001372   -0.000004804    0.000003534
   13          6           0.000000202   -0.000001626   -0.000001891
   14          6           0.000001429    0.000000682   -0.000001681
   15          6          -0.000001007    0.000002582   -0.000006758
   16          6           0.000004534    0.000003637   -0.000002314
   17          1          -0.000007389    0.000001071   -0.000000440
   18          1           0.000000247    0.000003102   -0.000001587
   19          1          -0.000000432    0.000002262    0.000000002
   20          1           0.000001181    0.000004346   -0.000000545
   21          1           0.000002619    0.000002089   -0.000000266
   22          1           0.000002062    0.000003113    0.000000125
   23          1          -0.000001551   -0.000000397   -0.000000363
   24          1          -0.000002322    0.000000413   -0.000001507
   25          1           0.000003111   -0.000000777    0.000001664
   26          1           0.000001387   -0.000003089    0.000002038
   27          1           0.000000829   -0.000004171    0.000002084
   28          1          -0.000003131    0.000000720   -0.000001641
   29          1          -0.000000878    0.000001392   -0.000001544
   30          1          -0.000001747   -0.000002118   -0.000003140
   31          1          -0.000004350   -0.000000568   -0.000001379
   32          1          -0.000001399   -0.000001749    0.000000055
   33          1          -0.000002758   -0.000002019   -0.000002535
   34          1          -0.000002740   -0.000004418    0.000000701
 -------------------------------------------------------------------
 Cartesian Forces:  Max     0.000030112 RMS     0.000005607
 ------------------------------------------------------------------------
           Internal Coordinate Forces (Hartree/Bohr or radian)
 Cent Atom N1     Length/X     N2     Alpha/Y      N3      Beta/Z       J
 ------------------------------------------------------------------------
   1  C        -0.000009(   1)      0.000003(  35)     -0.000007(  69)
   2  C         0.000010(   2)     -0.000001(  36)      0.000001(  70)
   3  C        -0.000027(   3)     -0.000013(  37)      0.000003(  71)
   4  O         0.000008(   4)      0.000003(  38)      0.000004(  72)
   5  O         0.000030(   5)      0.000004(  39)     -0.000008(  73)
   6  C         0.000001(   6)      0.000004(  40)     -0.000001(  74)
   7  C        -0.000006(   7)      0.000005(  41)      0.000004(  75)
   8  C        -0.000008(   8)      0.000002(  42)      0.000007(  76)
   9  C         0.000008(   9)      0.000001(  43)     -0.000001(  77)
  10  C         0.000007(  10)     -0.000005(  44)      0.000012(  78)
  11  C        -0.000001(  11)     -0.000004(  45)      0.000003(  79)
  12  C        -0.000001(  12)     -0.000005(  46)      0.000004(  80)
  13  C         0.000000(  13)     -0.000002(  47)     -0.000002(  81)
  14  C         0.000001(  14)      0.000001(  48)     -0.000002(  82)
  15  C        -0.000001(  15)      0.000003(  49)     -0.000007(  83)
  16  C         0.000005(  16)      0.000004(  50)     -0.000002(  84)
  17  H        -0.000007(  17)      0.000001(  51)      0.000000(  85)
  18  H         0.000000(  18)      0.000003(  52)     -0.000002(  86)
  19  H         0.000000(  19)      0.000002(  53)      0.000000(  87)
  20  H         0.000001(  20)      0.000004(  54)     -0.000001(  88)
  21  H         0.000003(  21)      0.000002(  55)      0.000000(  89)
  22  H         0.000002(  22)      0.000003(  56)      0.000000(  90)
  23  H        -0.000002(  23)      0.000000(  57)      0.000000(  91)
  24  H        -0.000002(  24)      0.000000(  58)     -0.000002(  92)
  25  H         0.000003(  25)     -0.000001(  59)      0.000002(  93)
  26  H         0.000001(  26)     -0.000003(  60)      0.000002(  94)
  27  H         0.000001(  27)     -0.000004(  61)      0.000002(  95)
  28  H        -0.000003(  28)      0.000001(  62)     -0.000002(  96)
  29  H        -0.000001(  29)      0.000001(  63)     -0.000002(  97)
  30  H        -0.000002(  30)     -0.000002(  64)     -0.000003(  98)
  31  H        -0.000004(  31)     -0.000001(  65)     -0.000001(  99)
  32  H        -0.000001(  32)     -0.000002(  66)      0.000000( 100)
  33  H        -0.000003(  33)     -0.000002(  67)     -0.000003( 101)
  34  H        -0.000003(  34)     -0.000004(  68)      0.000001( 102)
 ------------------------------------------------------------------------
 Internal  Forces:  Max     0.000030112 RMS     0.000005607

 GradGradGradGradGradGradGradGradGradGradGradGradGradGradGradGradGradGrad
 Berny optimization.
 Search for a local minimum.
 Step number   1 out of a maximum of   2
 All quantities printed in internal units (Hartrees-Bohrs-Radians)
 Second derivative matrix not updated -- analytic derivatives used.
     Eigenvalues ---    0.00009   0.00015   0.00027   0.00063   0.00084
     Eigenvalues ---    0.00100   0.00160   0.00182   0.00213   0.00257
     Eigenvalues ---    0.00439   0.00601   0.00723   0.00788   0.01091
     Eigenvalues ---    0.01459   0.01551   0.01678   0.01919   0.02503
     Eigenvalues ---    0.03048   0.03141   0.03358   0.04326   0.04331
     Eigenvalues ---    0.05012   0.05259   0.05318   0.05502   0.05734
     Eigenvalues ---    0.05945   0.06179   0.07030   0.07133   0.07329
     Eigenvalues ---    0.07619   0.08026   0.08665   0.08899   0.09168
     Eigenvalues ---    0.09936   0.10440   0.10851   0.11226   0.11307
     Eigenvalues ---    0.11366   0.11901   0.12073   0.13474   0.14773
     Eigenvalues ---    0.15693   0.16060   0.16969   0.18065   0.18450
     Eigenvalues ---    0.19050   0.19937   0.21209   0.21647   0.23351
     Eigenvalues ---    0.25277   0.27219   0.29564   0.31774   0.32340
     Eigenvalues ---    0.39195   0.41501   0.42669   0.44241   0.50235
     Eigenvalues ---    0.55137   0.61263   0.62149   0.66968   0.67381
     Eigenvalues ---    0.68299   0.72169   0.74023   0.75491   0.77670
     Eigenvalues ---    0.78555   0.79034   0.81897   0.82043   0.85519
     Eigenvalues ---    0.86543   0.90418   0.90595   0.93773   0.99200
     Eigenvalues ---    1.07536   1.09387   1.25107   1.25342   1.30995
     Eigenvalues ---    1.56616
 Angle between quadratic step and forces=  86.75 degrees.
 Linear search not attempted -- first point.
 TrRot=  0.000014 -0.000005  0.000085 -0.000002 -0.000014 -0.000002
 Variable       Old X    -DE/DX   Delta X   Delta X   Delta X     New X
                                 (Linear)    (Quad)   (Total)
    X1        0.32754  -0.00001   0.00000   0.00007   0.00008   0.32762
    Y1        0.02177   0.00000   0.00000  -0.00011  -0.00011   0.02165
    Z1       -0.00440  -0.00001   0.00000   0.00048   0.00057  -0.00383
    X2        0.86791   0.00001   0.00000   0.00008   0.00010   0.86801
    Y2        2.50289   0.00000   0.00000  -0.00012  -0.00013   2.50277
    Z2        0.11009   0.00000   0.00000   0.00083   0.00093   0.11102
    X3        2.40926  -0.00003   0.00000   0.00007   0.00008   2.40934
    Y3       -1.89459  -0.00001   0.00000  -0.00015  -0.00016  -1.89476
    Z3       -0.07392   0.00000   0.00000   0.00125   0.00137  -0.07255
    X4        2.06964   0.00001   0.00000   0.00026   0.00026   2.06990
    Y4       -4.15669   0.00000   0.00000  -0.00014  -0.00015  -4.15685
    Z4       -0.05755   0.00000   0.00000   0.00415   0.00426  -0.05329
    X5        4.74548   0.00003   0.00000   0.00003   0.00005   4.74553
    Y5       -0.85356   0.00000   0.00000  -0.00009  -0.00011  -0.85368
    Z5       -0.15577  -0.00001   0.00000  -0.00147  -0.00132  -0.15709
    X6        9.25499   0.00000   0.00000  -0.00004  -0.00003   9.25496
    Y6       -1.06147   0.00000   0.00000   0.00015   0.00011  -1.06136
    Z6       -0.31723   0.00000   0.00000  -0.00226  -0.00205  -0.31928
    X7        6.84425  -0.00001   0.00000   0.00013   0.00014   6.84439
    Y7       -2.60139   0.00000   0.00000   0.00001  -0.00002  -2.60141
    Z7       -0.22713   0.00000   0.00000   0.00033   0.00051  -0.22662
    X8       -0.94710  -0.00001   0.00000  -0.00004  -0.00001  -0.94712
    Y8        4.67637   0.00000   0.00000  -0.00019  -0.00019   4.67618
    Z8        0.32824   0.00001   0.00000   0.00088   0.00095   0.32918
    X9       -2.29625   0.00001   0.00000   0.00006   0.00007  -2.29618
    Y9       -1.01512   0.00000   0.00000  -0.00001  -0.00001  -1.01512
    Z9       -0.04864   0.00000   0.00000   0.00000   0.00006  -0.04859
   X10       -3.19380   0.00001   0.00000  -0.00053  -0.00055  -3.19436
   Y10       -2.53306   0.00000   0.00000   0.00004   0.00005  -2.53302
   Z10        1.92477   0.00001   0.00000  -0.00020  -0.00016   1.92460
   X11       -5.65319   0.00000   0.00000  -0.00059  -0.00061  -5.65380
   Y11       -3.46623   0.00000   0.00000   0.00020   0.00021  -3.46602
   Z11        1.88984   0.00000   0.00000  -0.00086  -0.00086   1.88898
   X12       -7.25364   0.00000   0.00000  -0.00005  -0.00004  -7.25368
   Y12       -2.91794   0.00000   0.00000   0.00029   0.00031  -2.91764
   Z12       -0.13121   0.00000   0.00000  -0.00127  -0.00129  -0.13250
   X13       -6.37488   0.00000   0.00000   0.00055   0.00059  -6.37428
   Y13       -1.43145   0.00000   0.00000   0.00024   0.00026  -1.43120
   Z13       -2.11792   0.00000   0.00000  -0.00105  -0.00106  -2.11898
   X14       -0.44691   0.00000   0.00000   0.00036   0.00035  -0.44656
   Y14        6.12210   0.00000   0.00000   0.00028   0.00028   6.12237
   Z14        2.80556   0.00000   0.00000   0.00050   0.00058   2.80614
   X15       -0.69201   0.00000   0.00000  -0.00065  -0.00059  -0.69260
   Y15        6.45084   0.00000   0.00000  -0.00057  -0.00057   6.45028
   Z15       -1.96387  -0.00001   0.00000   0.00048   0.00056  -1.96331
   X16       -3.91434   0.00000   0.00000   0.00060   0.00064  -3.91370
   Y16       -0.49085   0.00000   0.00000   0.00010   0.00011  -0.49074
   Z16       -2.07472   0.00000   0.00000  -0.00041  -0.00038  -2.07510
   X17        2.85357  -0.00001   0.00000   0.00005   0.00007   2.85364
   Y17        3.03326   0.00000   0.00000  -0.00007  -0.00008   3.03318
   Z17        0.09994   0.00000   0.00000   0.00114   0.00126   0.10120
   X18        9.43654   0.00000   0.00000   0.00027   0.00026   9.43680
   Y18        0.14303   0.00000   0.00000   0.00228   0.00225   0.14528
   Z18        1.34989   0.00000   0.00000  -0.00384  -0.00362   1.34627
   X19        9.31325   0.00000   0.00000  -0.00066  -0.00061   9.31264
   Y19        0.13941   0.00000   0.00000  -0.00194  -0.00198   0.13743
   Z19       -1.99571   0.00000   0.00000  -0.00378  -0.00356  -1.99927
   X20       10.88953   0.00000   0.00000   0.00011   0.00012  10.88965
   Y20       -2.32460   0.00000   0.00000   0.00029   0.00026  -2.32435
   Z20       -0.37591   0.00000   0.00000  -0.00113  -0.00088  -0.37679
   X21        6.63772   0.00000   0.00000  -0.00010  -0.00007   6.63765
   Y21       -3.81607   0.00000   0.00000  -0.00217  -0.00219  -3.81826
   Z21       -1.88330   0.00000   0.00000   0.00195   0.00213  -1.88117
   X22        6.75787   0.00000   0.00000   0.00067   0.00065   6.75852
   Y22       -3.80874   0.00000   0.00000   0.00218   0.00216  -3.80659
   Z22        1.44512   0.00000   0.00000   0.00193   0.00211   1.44723
   X23       -2.88131   0.00000   0.00000   0.00003   0.00005  -2.88125
   Y23        3.95331   0.00000   0.00000  -0.00034  -0.00033   3.95297
   Z23        0.38257   0.00000   0.00000   0.00136   0.00140   0.38397
   X24       -1.95557   0.00000   0.00000  -0.00098  -0.00103  -1.95660
   Y24       -2.98932   0.00000   0.00000  -0.00005  -0.00005  -2.98938
   Z24        3.49281   0.00000   0.00000   0.00010   0.00016   3.49297
   X25       -6.31856   0.00000   0.00000  -0.00103  -0.00108  -6.31965
   Y25       -4.63339   0.00000   0.00000   0.00023   0.00024  -4.63315
   Z25        3.43987   0.00000   0.00000  -0.00103  -0.00104   3.43883
   X26       -9.16774   0.00000   0.00000  -0.00007  -0.00006  -9.16780
   Y26       -3.65434   0.00000   0.00000   0.00036   0.00039  -3.65396
   Z26       -0.16092   0.00000   0.00000  -0.00177  -0.00181  -0.16273
   X27       -7.59829   0.00000   0.00000   0.00100   0.00106  -7.59723
   Y27       -1.00981   0.00000   0.00000   0.00027   0.00029  -1.00952
   Z27       -3.70966   0.00000   0.00000  -0.00138  -0.00140  -3.71107
   X28        1.47861   0.00000   0.00000   0.00025   0.00024   1.47885
   Y28        6.87841   0.00000   0.00000   0.00057   0.00056   6.87897
   Z28        2.85903   0.00000   0.00000  -0.00008   0.00003   2.85905
   X29       -0.69318   0.00000   0.00000   0.00090   0.00086  -0.69232
   Y29        4.90195   0.00000   0.00000   0.00054   0.00054   4.90249
   Z29        4.45342   0.00000   0.00000   0.00077   0.00085   4.45426
   X30       -1.75143   0.00000   0.00000   0.00016   0.00015  -1.75128
   Y30        7.71509   0.00000   0.00000   0.00011   0.00011   7.71521
   Z30        2.99195   0.00000   0.00000   0.00051   0.00057   2.99252
   X31        1.22456   0.00000   0.00000  -0.00083  -0.00076   1.22380
   Y31        7.21716   0.00000   0.00000  -0.00022  -0.00023   7.21693
   Z31       -2.10996   0.00000   0.00000   0.00009   0.00019  -2.10976
   X32       -1.11315   0.00000   0.00000  -0.00069  -0.00060  -1.11375
   Y32        5.47433   0.00000   0.00000  -0.00101  -0.00102   5.47332
   Z32       -3.73445   0.00000   0.00000   0.00074   0.00081  -3.73364
   X33       -1.99322   0.00000   0.00000  -0.00097  -0.00090  -1.99413
   Y33        8.04817   0.00000   0.00000  -0.00081  -0.00080   8.04736
   Z33       -1.79343   0.00000   0.00000   0.00032   0.00038  -1.79305
   X34       -3.23114   0.00000   0.00000   0.00105   0.00112  -3.23002
   Y34        0.64313   0.00000   0.00000   0.00002   0.00002   0.64316
   Z34       -3.64134   0.00000   0.00000  -0.00026  -0.00023  -3.64157
         Item               Value     Threshold  Converged?
 Maximum Force            0.000030     0.000450     YES
 RMS     Force            0.000006     0.000300     YES
 Maximum Displacement     0.004260     0.001800     NO 
 RMS     Displacement     0.001049     0.001200     YES
 Predicted change in Energy=-1.355103D-08
 GradGradGradGradGradGradGradGradGradGradGradGradGradGradGradGradGradGrad


 Test job not archived.
 1|1|UNPC-UNK|Freq|RB3LYP|6-311+G(d)|C14H18O2|PCUSER|15-Jul-2019|0||# F
 REQ RB3LYP/6-311+G(D) GEOM=CONNECTIVITY TEST||[No Title]||0,1|C,0.1733
 249746,0.0115189153,-0.0023269576|C,0.4592799746,1.3244739153,0.058257
 0424|C,1.2749239746,-1.0025760847,-0.0391189576|O,1.0952079746,-2.1996
 270847,-0.0304529576|O,2.5112009746,-0.4516870847,-0.0824319576|C,4.89
 75279746,-0.5617070847,-0.1678729576|C,3.6218209746,-1.3765980847,-0.1
 201929576|C,-0.5011860254,2.4746269153,0.1736960424|C,-1.2151210254,-0
 .5371760847,-0.0257399576|C,-1.6900880254,-1.3404400847,1.0185420424|C
 ,-2.9915390254,-1.8342500847,1.0000590424|C,-3.8384610254,-1.544108084
 7,-0.0694329576|C,-3.3734390254,-0.7574930847,-1.1207549576|C,-0.23649
 30254,3.2396749153,1.4846380424|C,-0.3661980254,3.4136389153,-1.039235
 9576|C,-2.0713790254,-0.2597480847,-1.0978939576|H,1.5100449746,1.6051
 329153,0.0528850424|H,4.9936009746,0.0756899153,0.7143320424|H,4.92836
 09746,0.0737719153,-1.0560829576|H,5.7624929746,-1.2301260847,-0.19892
 19576|H,3.5125289746,-2.0193780847,-0.9965969576|H,3.5761109746,-2.015
 5010847,0.7647260424|H,-1.5247210254,2.0919989153,0.2024450424|H,-1.03
 48440254,-1.5818820847,1.8483150424|H,-3.3436390254,-2.4518820847,1.82
 03010424|H,-4.8513590254,-1.9337960847,-0.0851539576|H,-4.0208430254,-
 0.5343700847,-1.9630699576|H,0.7824459746,3.6398959153,1.5129310424|H,
 -0.3668170254,2.5940009153,2.3566460424|H,-0.9268180254,4.0826519153,1
 .5832720424|H,0.6480109746,3.8191559153,-1.1165409576|H,-0.5890550254,
 2.8968909153,-1.9761869576|H,-1.0547680254,4.2589069153,-0.9490409576|
 H,-1.7098460254,0.3403319153,-1.9269149576||Version=x86-Win32-G03RevB.
 05|State=1-A|HF=-694.9516428|RMSD=4.090e-009|RMSF=5.607e-006|Dipole=0.
 3097788,0.9030884,0.0531908|DipoleDeriv=0.0854319,0.4412437,0.0299108,
 0.3422963,-0.5205382,-0.0191848,-0.0134214,-0.0364491,-0.0964517,-0.07
 04366,-0.139375,-0.0206488,-0.092255,0.4961955,0.0559473,-0.0303506,0.
 0658819,-0.1782418,2.1031116,-0.4951665,-0.0906636,0.2438625,1.5369626
 ,0.0495834,-0.0716442,0.015784,0.2932749,-0.8400174,0.125808,0.0132267
 ,-0.1879937,-1.2131449,-0.0331465,0.0421936,-0.0168557,-0.3120612,-2.1
 607869,0.2247515,0.0662164,0.0459577,-0.5582744,-0.0100136,0.068781,-0
 .0099443,-0.253439,-0.0555472,-0.0445486,0.0067821,-0.045054,0.0722964
 ,0.0021877,0.0061697,0.0024407,0.119846,1.0614962,-0.1960159,-0.025882
 ,-0.387996,0.4093007,0.0128939,-0.0331509,0.0096792,0.3175227,0.037602
 6,-0.0464741,-0.0106764,0.0404702,-0.0205497,-0.0138576,-0.0017526,-0.
 0310875,0.143891,0.1429347,0.0774327,0.0113899,0.1497749,-0.0345321,-0
 .0167155,-0.0101991,0.0115504,0.0141548,-0.0367314,-0.0941848,0.079720
 5,-0.0539642,-0.0503747,-0.0474541,0.0635324,-0.0694442,0.0010919,-0.0
 382685,0.0764506,-0.051833,0.0441607,-0.0486326,-0.1268179,-0.029699,-
 0.1088202,0.0337568,0.050404,0.0559507,0.0213466,0.0698771,-0.0951276,
 -0.0430431,0.0143706,-0.0423298,-0.0509589,-0.0062228,-0.0059983,0.108
 258,0.0084622,-0.0949425,-0.0546357,0.0956351,-0.0591122,0.038977,0.12
 40699,0.1220728,0.0151936,0.0025529,0.0264057,-0.0160644,-0.0232624,0.
 073751,0.027496,0.1361367,0.1214021,-0.0029529,0.0004448,0.0503099,0.0
 14083,0.0190472,-0.0661876,0.020069,-0.0774499,0.0190849,-0.0337542,-0
 .0173682,-0.1184023,-0.0748589,-0.0079914,-0.04997,-0.0053955,-0.03786
 61,-0.0439439,0.0017085,-0.1226673,0.023406,-0.0035085,0.0205381,0.005
 4233,0.1018585,0.0616187,-0.0055174,0.0181818,-0.0657583,-0.0056841,-0
 .0852994,-0.0205822,-0.1008299,-0.0736566,0.0607661,0.0018914,-0.02820
 22,-0.0596402,-0.0042625,0.0889633,0.011421,0.0998792,-0.0721168,-0.11
 16465,0.0809979,0.0070521,0.1196602,-0.0229127,-0.0042457,0.0072617,-0
 .0028356,0.0869962,-0.0553739,-0.0186081,-0.0386112,0.0674804,-0.02385
 82,-0.0653931,0.007517,-0.0909659,-0.0647288,-0.0548819,-0.0118352,0.0
 399874,0.0721318,-0.024482,0.060993,-0.0080656,0.0931138,-0.0691876,-0
 .1127381,-0.0284835,0.0062936,-0.0342197,0.0143326,0.010691,0.0083139,
 0.0195736,-0.0174253,0.0168423,0.0159674,-0.0941276,0.0121012,0.101248
 9,0.0393825,-0.0901011,0.0322306,-0.0038587,0.0405818,-0.0633607,0.032
 1481,-0.0668744,0.04104,0.1082323,0.0456999,0.1142086,-0.0255372,-0.10
 63185,-0.0941064,-0.0145902,-0.0874531,0.088888,0.0258089,-0.0130861,0
 .0260535,0.0870034,-0.0123643,-0.012336,-0.0962365,0.0077984,0.105591,
 0.0597662,-0.1081655,0.0510363,-0.035259,-0.1370353,-0.1118887,-0.0306
 992,-0.055974,0.0389367,-0.0239335,0.0380068,-0.000223,0.042446,0.0634
 086,-0.0239934,0.0158333,-0.0185236,0.0022103,0.1183238,0.0121541,0.06
 79362,-0.0931032,-0.0222662,0.125286,0.0163038,0.0934739,-0.1349458,-0
 .0602492,-0.0140869,-0.0609736,0.0431139,-0.1338312,-0.1155644,0.03671
 58,-0.0472883,0.0348486,0.0310255,-0.0293727,0.0034429,0.0489818,0.056
 1063,-0.0233119,-0.0444511,-0.0255473,0.0217556,-0.1049087,-0.0375115,
 -0.0622688,-0.1163367,-0.0200416,0.1330435,0.007385,0.0927622,-0.14634
 47,0.0229506,0.0331751,0.0187275,0.0535726,0.0493128,-0.0466701,0.0496
 749,-0.04469,0.0532803,0.1024976,0.0486259,0.097585,-0.0062944|Polar=1
 97.701794,14.7906583,181.380332,4.7058664,-9.7040616,140.1170525|PG=C0
 1 [X(C14H18O2)]|NImag=0||0.54183150,0.08872573,0.74996293,0.00722301,0
 .01136569,0.15798150,-0.13220492,-0.08686811,-0.00445922,0.61154345,-0
 .08179622,-0.45994737,-0.01763460,0.07714905,0.76723293,-0.00545085,-0
 .02113577,-0.05618318,-0.00626718,0.03282443,0.17059847,-0.14930729,0.
 03700158,0.00274589,0.01774157,0.01542781,0.00074785,0.54512964,0.0398
 7702,-0.10674414,0.00007176,0.02123722,-0.03847887,-0.00246772,0.03165
 832,0.93009417,0.00510879,0.00091444,-0.07913740,0.00035030,-0.0037863
 5,-0.00003679,-0.01063063,0.00014498,0.21157536,0.01386741,0.02527661,
 -0.00018470,-0.00589326,0.00215300,0.00031006,-0.11648117,-0.06681094,
 0.00079423,0.13169881,0.00432845,-0.06170161,-0.00011544,0.00899162,0.
 00462975,0.00019695,-0.06233609,-0.67755205,0.00337012,0.11221906,0.79
 532573,0.00025771,-0.00104120,0.02155417,-0.00009540,0.00027478,0.0026
 9827,0.00081134,0.00275452,-0.07804508,-0.00412793,-0.00516834,0.03251
 169,-0.04665816,0.00288394,0.00276460,-0.00756876,-0.00539241,-0.00035
 761,-0.20804316,-0.03970761,0.00557417,-0.02824591,-0.07023143,0.00239
 300,0.47618413,0.02119322,0.01365012,-0.00092690,0.00199613,-0.0059624
 2,-0.00038578,-0.02165917,-0.13269249,0.00024099,-0.07082474,-0.054899
 63,0.00286832,-0.00669944,0.35034922,0.00166899,0.00006631,0.00981335,
 0.00038692,0.00002040,0.00174520,0.00537373,0.00090249,-0.06438091,0.0
 0218853,0.00258555,0.02851585,-0.01478779,0.00041240,0.07444528,-0.001
 16992,-0.00069727,0.00004407,0.00007379,-0.00014554,-0.00001958,-0.000
 51020,0.00568664,0.00005260,0.00071057,-0.00175958,0.00002395,-0.04397
 080,-0.00917236,0.00163933,0.51309078,0.00138913,0.00080693,-0.0000712
 2,0.00014713,0.00029856,0.00003436,0.00041965,-0.00822811,-0.00008157,
 -0.00135648,0.00321662,0.00003285,0.03244400,0.01311546,-0.00117200,-0
 .03713142,0.55524278,0.00004065,0.00001013,-0.00005158,0.00001336,0.00
 003325,-0.00008783,-0.00001227,-0.00018645,0.00010016,0.00002630,0.000
 04763,0.00109570,0.00158940,0.00031413,0.00113419,0.00232299,0.0012495
 6,0.57492768,0.00131781,-0.00522544,-0.00005908,0.00111306,0.00021080,
 0.00003539,-0.06525022,0.00783821,0.00219913,0.00651745,0.01525718,-0.
 00057410,-0.11004464,0.03162713,0.00160969,-0.15699785,-0.07471879,0.0
 0269376,0.44669463,-0.00591650,-0.00101677,0.00034069,-0.00001340,-0.0
 0103111,-0.00011536,0.00869696,0.02704478,-0.00016001,-0.00727927,-0.0
 1056634,0.00034949,0.05384957,-0.14194961,-0.00191631,-0.06162168,-0.1
 2725360,0.00239630,0.06345481,0.53088850,-0.00011642,0.00028151,0.0048
 0312,-0.00007419,0.00001129,-0.00033654,0.00211031,-0.00056419,-0.0002
 2998,-0.00039033,-0.00047702,-0.00633603,0.00153336,-0.00105709,-0.066
 76907,0.00267555,0.00288212,-0.08748892,0.00595543,-0.00200896,0.61660
 042,0.01346710,-0.00321753,0.00017552,-0.14945045,0.05613069,0.0059183
 8,-0.00506265,-0.00177562,0.00053937,0.00159177,-0.00195145,-0.0001636
 1,0.00133271,0.00121213,-0.00003594,0.00001740,-0.00010538,-0.00000596
 ,-0.00001139,0.00026471,0.00001100,0.60230377,0.01872139,-0.02709169,-
 0.00288488,0.05593345,-0.14276156,-0.00547494,-0.00647343,0.00067010,-
 0.00112888,0.00119242,-0.00196007,0.00028826,0.00097958,0.00156762,0.0
 0015056,0.00000245,-0.00004242,-0.00000685,0.00033100,0.00011544,0.000
 00850,0.03680947,0.47469200,0.00145404,-0.00086149,0.00978738,0.007256
 38,-0.00753664,-0.07152922,-0.00039966,-0.00038772,0.01520360,0.000199
 62,-0.00019136,-0.00369543,-0.00010292,0.00015895,-0.00137418,-0.00000
 331,0.00000921,0.00001552,0.00003152,-0.00002180,-0.00007193,-0.005045
 28,-0.00178347,0.42283848,-0.19616493,-0.04144207,-0.00565869,-0.00675
 203,-0.01658907,0.00288812,-0.03162566,0.00090797,-0.00375190,-0.00013
 176,-0.00503570,0.00045868,0.00049872,0.00173593,0.00010353,-0.0000847
 3,0.00009653,0.00001361,-0.00066064,-0.00020249,0.00022079,0.00065734,
 0.00182779,-0.00055015,0.58936184,-0.04231699,-0.10145773,0.00776951,-
 0.03338064,-0.01275973,0.00068281,0.01420584,0.01548925,-0.00093065,0.
 00110093,-0.00227151,0.00016233,0.00641368,-0.00404482,-0.00025207,0.0
 0032387,-0.00049734,-0.00000680,-0.00011418,0.00142313,0.00002130,-0.0
 0068332,-0.00005343,0.00022266,0.11588311,0.34116992,-0.00606970,0.007
 32712,-0.07734567,-0.00085784,-0.00040800,0.00514469,-0.00051070,0.000
 05314,0.00186125,-0.00010419,-0.00008749,-0.00083668,-0.00025622,0.000
 03904,0.00153852,-0.00000761,0.00001953,0.00002256,0.00004886,-0.00008
 583,0.00069325,-0.00009296,0.00039514,-0.00588002,0.07685415,-0.188937
 43,0.52340624,-0.01183520,-0.02205229,0.02270566,-0.00443921,0.0021738
 6,0.00023572,0.00039544,-0.00150268,0.00154581,-0.00239098,0.00096848,
 -0.00006319,-0.00055926,0.00041376,-0.00011798,-0.00002798,0.00003673,
 -0.00000862,0.00028505,-0.00022593,-0.00000829,-0.00044309,0.00036191,
 0.00106742,-0.13756873,-0.03522090,0.00994061,0.64395715,-0.01463583,-
 0.00837342,0.00868988,0.00016637,0.00307636,-0.00022769,0.00134099,-0.
 00202024,0.00136991,0.00119954,0.00086141,0.00013808,-0.00042520,0.000
 14318,-0.00009963,-0.00000555,0.00003385,-0.00001173,0.00014123,-0.000
 09645,-0.00017028,-0.00005838,0.00016420,0.00066544,-0.05962591,-0.144
 44360,0.09252941,0.12512931,0.30744649,0.00416736,0.00095944,0.0054260
 0,-0.00187738,-0.00186195,0.00006739,-0.00060773,-0.00295147,0.0000781
 4,0.00080684,0.00167172,-0.00156141,-0.00031979,0.00071490,0.00019773,
 -0.00003763,0.00004880,-0.00001028,0.00000401,-0.00014667,0.00013364,0
 .00011732,-0.00009147,0.00010785,0.06090930,0.11407521,-0.21456651,0.1
 2099685,-0.21264516,0.57264723,0.00368381,-0.00119245,0.00015844,-0.00
 008662,-0.00089018,0.00021538,-0.00004768,-0.00084359,-0.00096565,0.00
 120447,0.00044462,0.00016441,0.00020974,0.00010311,-0.00002623,-0.0000
 0242,-0.00000368,0.00000060,-0.00009217,0.00007636,0.00003430,-0.00004
 276,-0.00034720,-0.00041343,-0.00765984,-0.04244694,0.06630613,-0.3033
 4796,-0.06840610,-0.03940000,0.61548316,-0.00160183,0.00328852,0.00495
 662,0.00028287,0.00011477,0.00000533,-0.00075167,-0.00216720,-0.000065
 05,0.00083480,0.00092420,-0.00026715,0.00008668,0.00054323,-0.00009100
 ,-0.00002431,0.00001363,0.00000088,-0.00010362,-0.00001975,-0.00002591
 ,-0.00003260,-0.00013671,0.00014344,-0.02171976,-0.00890886,0.01383240
 ,-0.10113892,-0.10886582,0.01535977,0.15160316,0.33026527,-0.00018699,
 0.00528142,-0.00212931,0.00158904,-0.00001232,0.00004295,-0.00037150,0
 .00014079,-0.00041526,0.00048274,-0.00033103,0.00032912,-0.00016988,0.
 00005962,-0.00009712,-0.00001244,0.00000914,0.00000047,0.00001598,-0.0
 0004169,-0.00005077,-0.00001607,-0.00020006,-0.00027544,0.02727969,-0.
 00264389,0.03036125,0.01306514,0.03712299,-0.11493465,0.06178968,-0.23
 901705,0.58284030,-0.00030447,0.00012146,-0.00029957,-0.00024756,0.000
 62035,-0.00025254,0.00039364,-0.00061497,0.00036344,-0.00025883,0.0003
 4213,-0.00002230,-0.00046387,0.00025380,-0.00001923,-0.00002249,0.0000
 3389,0.00000132,0.00014573,-0.00015911,-0.00004661,-0.00027377,-0.0000
 0262,0.00007626,-0.00082230,0.00653795,-0.00819162,-0.03831740,-0.0057
 0396,-0.02148645,-0.19699847,0.02258997,-0.12966057,0.67339867,0.00032
 384,-0.00096273,-0.00018827,0.00004237,0.00000827,-0.00016101,0.000354
 19,-0.00039253,-0.00019376,0.00023109,0.00022873,0.00009567,-0.0001229
 8,0.00006077,0.00000136,-0.00000655,0.00000755,-0.00000245,0.00005054,
 -0.00003434,-0.00000014,-0.00013231,-0.00016586,-0.00017703,0.00690906
 ,-0.01774437,0.02530329,0.01652853,0.02606345,-0.01963117,-0.00775188,
 -0.09330606,0.04812086,0.16648688,0.31472870,-0.00001162,-0.00035134,-
 0.00103785,-0.00073865,0.00035330,0.00022054,0.00003735,0.00103232,0.0
 0040270,-0.00100918,-0.00030886,0.00003035,-0.00010207,-0.00014560,0.0
 0001569,0.00000247,-0.00000334,-0.00000464,0.00006502,-0.00002874,0.00
 000236,-0.00000076,0.00043119,0.00036271,-0.00806372,0.02417295,-0.055
 99797,-0.05985458,-0.03580077,0.02711107,-0.07750851,0.06925867,-0.232
 20063,0.07970003,-0.20466537,0.53922363,0.00203760,-0.00042592,-0.0033
 8886,-0.00148638,0.00029999,0.00052241,-0.00021569,0.00086684,-0.00005
 239,-0.00081569,-0.00024672,0.00020114,-0.00006785,-0.00012289,0.00003
 694,0.00000078,-0.00000092,0.00000281,0.00005829,-0.00002318,0.0000123
 7,-0.00050853,0.00043193,0.00037564,-0.03704817,0.01658537,-0.06036884
 ,-0.03751670,-0.02527929,0.02196917,0.05583870,0.01277586,0.01078923,-
 0.14549517,-0.04195547,0.01505593,0.62886040,0.00015343,0.00536454,0.0
 0358095,0.00068009,-0.00017615,0.00044794,-0.00069146,0.00028454,-0.00
 029409,-0.00058244,-0.00016710,0.00010473,-0.00029910,0.00011720,-0.00
 006247,-0.00001630,0.00002580,0.00001547,0.00000003,-0.00009316,-0.000
 01660,0.00029918,0.00021986,0.00040750,-0.00561197,0.02360008,-0.03470
 975,-0.02481930,-0.02428621,0.01310074,0.03487452,0.00236305,0.0342623
 8,-0.07181172,-0.14915830,0.10277370,0.13094962,0.30641435,-0.00322427
 ,0.00437113,-0.00121056,0.00073501,-0.00008617,0.00040473,-0.00074295,
 -0.00103180,-0.00044485,0.00033475,0.00007755,0.00022124,-0.00036023,0
 .00029693,0.00007670,-0.00002411,0.00003820,0.00000616,-0.00006098,-0.
 00008701,0.00000909,0.00010876,-0.00032216,-0.00039069,-0.02127228,-0.
 01908756,0.02604215,0.02254631,0.01306467,-0.01471546,-0.02799554,0.01
 912626,-0.04377678,0.06716158,0.12367412,-0.23103526,0.11449656,-0.217
 11636,0.59092970,-0.00370516,0.00370365,-0.00088751,0.00540288,0.00974
 551,0.01943147,0.00321480,-0.00123133,-0.00236175,-0.00059382,0.001261
 80,0.00063435,-0.00145909,-0.00017911,0.00020518,-0.00000457,0.0000879
 9,0.00003469,0.00041681,-0.00019008,-0.00001168,-0.08429599,-0.0089967
 9,-0.01209889,-0.00080923,-0.00075335,0.00056383,0.00043751,0.00015558
 ,-0.00018758,-0.00024639,-0.00000495,-0.00009350,0.00008519,-0.0000579
 4,0.00027268,0.00053747,0.00001083,-0.00005117,0.55980552,0.00269563,-
 0.00028016,0.00040642,-0.00028925,-0.02363783,-0.02538656,-0.00105791,
 0.00012618,0.00237217,0.00033537,-0.00057755,-0.00059791,0.00036677,0.
 00002724,-0.00023399,0.00001459,-0.00002148,0.00002336,-0.00012004,0.0
 0010308,-0.00002659,-0.01234263,-0.09540198,-0.04490923,0.00012835,-0.
 00007665,-0.00064866,-0.00003038,0.00027091,-0.00007346,-0.00019113,-0
 .00003462,-0.00001332,-0.00002198,-0.00006813,0.00012900,0.00009913,0.
 00012086,-0.00010566,-0.01148395,0.54088906,-0.00140099,0.00377431,-0.
 00061033,0.00541549,-0.01252826,-0.00530413,0.00177521,-0.00098982,-0.
 00030618,-0.00031751,0.00092628,0.00013332,-0.00096304,0.00005407,0.00
 000250,-0.00001175,0.00004803,0.00000744,0.00030376,-0.00015401,0.0000
 3864,-0.01667481,-0.03595152,-0.13970663,-0.00039813,-0.00010106,-0.00
 000290,0.00016239,-0.00024798,0.00019204,0.00017252,0.00005907,-0.0000
 0842,0.00008104,0.00007540,-0.00013282,-0.00021419,-0.00008517,0.00005
 133,-0.01782032,-0.05294259,0.48891042,-0.00335306,0.00292972,0.001402
 93,0.00323688,0.01273194,-0.01838863,0.00270302,-0.00110684,0.00214098
 ,-0.00047932,0.00096416,-0.00054536,-0.00130607,-0.00017181,-0.0001382
 0,-0.00000378,0.00007644,-0.00002285,0.00035375,-0.00016177,-0.0000143
 4,-0.08203035,-0.00578005,0.00555732,-0.00033012,-0.00037527,-0.000839
 01,0.00043156,-0.00011462,-0.00006414,0.00002065,0.00015279,0.00004402
 ,0.00011181,0.00005936,-0.00002711,0.00009299,-0.00006603,-0.00000153,
 0.00095137,0.00316832,-0.00578695,0.56207481,0.00226463,0.00001387,-0.
 00055791,0.00199732,-0.02693691,0.02175336,-0.00062209,0.00006253,-0.0
 0247326,0.00021551,-0.00033627,0.00059558,0.00021897,-0.00000456,0.000
 24454,0.00000985,-0.00001416,-0.00001985,-0.00006076,0.00007235,0.0000
 2975,-0.00899230,-0.10870390,0.05155022,0.00033091,0.00004110,0.000868
 40,-0.00025831,-0.00006694,-0.00005786,0.00008150,-0.00001169,0.000011
 49,-0.00004608,0.00001329,-0.00007818,-0.00010922,-0.00002938,-0.00004
 538,0.00099156,0.01060843,-0.01150528,-0.00775034,0.52402203,0.0020592
 9,-0.00412657,-0.00138139,-0.00591905,0.00756503,0.00187210,-0.0022186
 8,0.00123738,-0.00078250,0.00037947,-0.00112971,0.00025291,0.00112899,
 -0.00003746,-0.00000465,0.00001357,-0.00005776,0.00000701,-0.00035465,
 0.00018129,0.00006290,0.00997910,0.04226996,-0.13061352,0.00064453,0.0
 0020799,0.00012006,-0.00024903,0.00006893,-0.00020224,-0.00003676,-0.0
 0001218,-0.00004375,-0.00003042,-0.00004750,0.00004598,0.00003478,0.00
 013178,-0.00026991,0.00245084,0.01747095,-0.03454161,0.00907747,0.0586
 7875,0.50212816,-0.02729855,0.00091361,-0.02348177,0.00030880,0.003899
 98,-0.00142063,-0.00041743,-0.00534577,-0.00074884,0.00139441,0.001508
 37,-0.00003451,-0.00155359,0.00111884,0.00040710,-0.00008032,0.0001275
 8,0.00000534,0.00019729,-0.00037810,0.00011236,-0.00003009,-0.00039887
 ,-0.00130786,-0.18324019,-0.00582714,-0.06903812,0.05520250,0.03280399
 ,-0.02777450,-0.05482364,-0.00337351,-0.02666959,-0.00740310,-0.044283
 72,0.06682752,-0.29762195,-0.06986532,-0.03971816,0.00017809,-0.000288
 00,0.00025432,0.00020843,0.00003892,-0.00027028,0.61350480,-0.00644901
 ,0.00776439,-0.00916638,-0.00095249,-0.00164416,0.00071482,-0.00035867
 ,-0.00289252,-0.00100393,0.00037430,0.00097110,0.00008827,-0.00089447,
 0.00072369,0.00026922,-0.00004504,0.00006970,-0.00002032,0.00015912,-0
 .00026155,0.00006702,-0.00025059,-0.00100099,-0.00139202,0.01944709,-0
 .09083538,0.06278362,0.01284658,0.00311043,0.01946937,-0.00443205,-0.0
 0584493,-0.00530092,-0.02130989,-0.00867991,0.01370325,-0.10076942,-0.
 10874620,0.01473167,-0.00034710,-0.00030536,0.00027359,0.00012311,0.00
 004400,-0.00044890,0.15847191,0.32477883,-0.00595255,-0.00212324,0.003
 60548,0.00206229,0.00100360,-0.00046281,0.00150704,-0.00164501,0.00006
 327,0.00134755,0.00068032,0.00022346,0.00096388,-0.00009639,-0.0001849
 3,0.00004278,-0.00006015,0.00000049,-0.00009831,0.00021106,-0.00002915
 ,0.00022266,-0.00019131,0.00007199,-0.12222484,0.04404035,-0.22134208,
 0.01013383,0.03442259,-0.04416646,-0.02560035,-0.00503721,-0.01623041,
 0.02787863,-0.00155764,0.02937873,0.01290095,0.03541622,-0.11466885,-0
 .00036719,0.00015585,-0.00003069,-0.00001361,0.00025465,0.00075750,0.0
 5316298,-0.22984097,0.57830397,-0.00556699,-0.00200491,0.00008732,-0.3
 0903853,-0.07196905,0.00115670,-0.00104408,-0.00043554,-0.00014043,0.0
 0024321,0.00000231,0.00006771,-0.00202966,0.00479270,0.00022953,0.0000
 6293,-0.00002142,0.00000892,0.00023458,0.00033431,0.00001823,-0.018121
 63,-0.00542742,0.00007840,0.00127969,-0.00033646,0.00042905,-0.0001731
 1,-0.00012385,-0.00030465,-0.00005580,0.00002262,0.00010919,0.00002576
 ,-0.00000983,0.00001239,0.00002183,-0.00002202,-0.00002653,0.00058008,
 -0.00083368,-0.00052591,0.00049330,-0.00083650,0.00038912,0.00004938,0
 .00000622,0.00009877,0.33257645,-0.03280497,-0.00749259,-0.00077838,-0
 .06423820,-0.07400585,-0.00084060,-0.00432191,-0.00101189,0.00061228,0
 .00087945,0.00103312,-0.00019536,0.00241201,-0.00102472,-0.00013402,0.
 00000728,0.00000834,-0.00001309,0.00131179,-0.00012014,0.00001491,0.02
 318460,0.00626473,-0.00022907,0.00147153,-0.00440063,-0.00041894,-0.00
 102117,-0.00006308,-0.00041354,-0.00008421,0.00013121,0.00036557,-0.00
 012095,-0.00006184,-0.00007214,-0.00021304,0.00016220,0.00005955,0.000
 51870,0.00141603,0.00074961,0.00037755,0.00158299,-0.00069591,-0.00021
 816,-0.00006808,0.00037153,0.07214829,0.08158084,-0.00190303,-0.000301
 99,0.00532138,0.00139802,-0.00045998,-0.04206163,-0.00029188,0.0005289
 2,-0.00812249,-0.00005993,0.00006962,0.00146827,0.00036412,-0.00026464
 ,0.00078355,0.00001213,-0.00001305,0.00018764,0.00000151,0.00004394,-0
 .00041438,0.00172000,0.00008753,0.00286186,0.00028921,-0.00127822,0.01
 129996,-0.00191216,-0.00063562,-0.00063365,-0.00003275,-0.00050475,0.0
 0045672,0.00012739,0.00005136,0.00017379,0.00039770,-0.00031496,-0.000
 13450,0.00050615,0.00103680,0.00099301,-0.00013726,-0.00104233,0.00070
 088,0.00130702,0.00054176,-0.00035751,-0.00203095,0.00227698,0.0265339
 4,0.00007538,0.00006045,-0.00000649,-0.00011264,-0.00002284,0.00001729
 ,-0.00065765,-0.00120529,0.00014863,-0.00030884,0.00087765,0.00018284,
 0.00334322,0.00049272,0.00010886,-0.04943852,-0.01078080,-0.01516938,-
 0.00360960,-0.01854665,-0.02670788,0.00002470,0.00003337,0.00000278,-0
 .00001312,-0.00001248,-0.00000364,0.00001160,0.00000601,0.00000270,0.0
 0000223,0.00000569,0.00000469,0.00000645,0.00000433,0.,0.00000151,-0.0
 0000233,0.00000198,-0.00001879,-0.00001152,-0.00000527,-0.00001071,-0.
 00000003,-0.00000344,0.00001547,0.00001664,-0.00000355,-0.00002755,0.0
 0005299,-0.00004480,0.05216130,-0.00005101,0.00006673,-0.00004529,-0.0
 0002432,-0.00001829,0.00000114,0.00024246,-0.00024216,0.00003990,-0.00
 029026,0.00020291,0.00017550,0.00071027,0.00137860,0.00108471,-0.01293
 604,-0.13609358,-0.12168954,-0.00035623,-0.01283716,-0.01647054,0.0000
 1192,-0.00000360,0.00000114,0.00002338,0.00003765,-0.00000835,-0.00002
 249,0.00000381,-0.00001228,0.00000426,0.00000266,0.00000215,-0.0000071
 2,0.00000167,-0.00000194,0.00000017,-0.00000424,0.00000181,-0.00001124
 ,0.00001685,-0.00001843,-0.00000616,0.00000888,0.00001451,-0.00001152,
 -0.00000585,0.00001307,-0.00000471,-0.00001195,-0.00001249,0.01634183,
 0.14641470,-0.00003178,0.00003466,0.00001250,-0.00012889,-0.00008010,0
 .00001764,0.00001752,0.00002436,0.00003161,0.00006030,0.00025056,-0.00
 005274,-0.00060161,0.00044764,0.00037373,-0.01688565,-0.12290375,-0.22
 302816,-0.00008381,0.00120914,0.00218388,0.00004582,0.00003403,-0.0000
 0332,-0.00001547,0.00003737,-0.00000719,0.00001145,-0.00000121,0.00000
 853,0.00000048,0.00000624,-0.00000039,0.00000117,0.00000183,-0.0000002
 8,-0.00000023,-0.00000119,0.00000093,-0.00005497,-0.00001451,-0.000008
 98,-0.00003965,-0.00000621,0.00000669,-0.00000058,0.00001242,0.0000000
 7,-0.00003668,0.00001345,-0.00004192,0.01782678,0.13555406,0.23822850,
 0.00007735,0.00005893,0.00000455,-0.00009305,-0.00000858,-0.00001594,-
 0.00066960,-0.00121085,-0.00009962,-0.00032752,0.00085472,-0.00016674,
 0.00339294,0.00049014,-0.00033054,-0.04801778,-0.00182870,0.00227421,-
 0.00161754,-0.01847898,0.02699375,0.00001703,0.00002940,0.00000357,-0.
 00001145,-0.00001751,0.00000232,0.00002014,0.00000353,0.00001852,0.000
 00027,0.00000527,-0.00000359,0.00000616,0.00000337,0.00000010,-0.00000
 177,0.00000108,-0.00000370,-0.00000534,-0.00000056,0.00000501,-0.00001
 239,-0.00001008,0.00000327,0.00001454,0.00000240,0.00000133,-0.0000235
 5,0.00004728,0.00005299,-0.00128454,0.00164491,-0.00134440,0.05052551,
 -0.00004831,0.00006713,0.00005443,-0.00002349,-0.00001442,-0.00000838,
 0.00023169,-0.00024187,-0.00005681,-0.00029847,0.00020104,-0.00014758,
 0.00064723,0.00137884,-0.00113311,-0.00402485,-0.13564630,0.12222369,0
 .00087033,-0.01275269,0.01646071,0.00000930,-0.00000272,-0.00000274,0.
 00001959,0.00003934,0.00000566,-0.00000427,-0.00000634,0.00000902,0.00
 000254,0.00000584,-0.00000494,-0.00000715,-0.00000072,-0.00000189,-0.0
 0000319,-0.00000520,-0.00000587,-0.00000844,0.00000941,-0.00001147,-0.
 00000581,0.00001309,0.00002019,-0.00001125,-0.00001496,0.00001585,-0.0
 0000205,-0.00001547,0.00000493,0.00049897,0.01296882,-0.01579953,0.006
 37519,0.14588002,0.00002756,-0.00003657,0.00000152,0.00012745,0.000068
 81,0.00003753,0.00004710,0.00006249,0.00003648,-0.00004515,-0.00031330
 ,-0.00003562,0.00037484,-0.00048346,0.00034690,0.00397485,0.12325919,-
 0.22499817,0.00037882,0.00018595,0.00016064,-0.00004239,-0.00003311,-0
 .00000904,0.00001547,-0.00003567,-0.00000273,-0.00001961,0.00000579,-0
 .00001864,0.00000099,-0.00000677,0.00000559,-0.00000182,-0.00000011,-0
 .00000001,0.00000104,-0.00000106,0.00000308,0.00003610,0.00000355,0.00
 000255,0.00005089,0.00001776,-0.00001166,0.00000138,-0.00000169,-0.000
 00487,0.00002971,-0.00000879,-0.00005788,-0.00002823,0.01562244,-0.020
 31870,-0.00401935,-0.13623964,0.24045548,-0.00043039,-0.00021431,0.000
 02525,-0.00006049,-0.00012182,-0.00001775,0.00132864,0.00270329,-0.000
 01164,-0.00015813,-0.00115331,0.00000783,-0.00790373,-0.00434953,0.000
 32981,-0.21058824,0.12441395,0.00587890,-0.01779097,0.02063827,0.00052
 345,0.00004687,0.00000874,-0.00000295,0.00000555,0.00020623,-0.0000110
 9,-0.00002788,-0.00001148,-0.00001621,0.00000712,-0.00000166,-0.000011
 29,-0.00002329,-0.00000580,-0.00000277,-0.00000218,-0.00001324,-0.0000
 1013,-0.00004577,0.00001849,-0.00003120,-0.00003857,0.00001281,0.00003
 763,-0.00005461,-0.00003734,0.00003812,0.00001834,-0.00005307,0.000002
 57,0.00319891,-0.00245679,0.00098958,0.00147036,-0.00131692,-0.0010832
 1,0.22963266,-0.00033704,-0.00021404,0.00002112,-0.00010983,-0.0000775
 8,-0.00000723,-0.00074475,0.00147537,0.00003831,0.00030614,-0.00018640
 ,-0.00001032,-0.00538234,-0.00109126,0.00019615,0.12695871,-0.14760177
 ,-0.00459059,-0.01241451,0.01198794,0.00043115,0.00003696,0.00003091,0
 .00000109,-0.00004923,0.00010923,-0.00000406,0.00000634,-0.00000128,-0
 .00000218,0.00000142,-0.00000581,-0.00000271,-0.00000203,0.00000043,0.
 00000104,0.00000184,-0.00000485,-0.00001015,-0.00003046,-0.00000752,-0
 .00000466,-0.00002940,-0.00000841,0.00000585,-0.00001745,-0.00000762,0
 .00000625,-0.00003722,0.00002895,0.00000640,0.01400929,-0.01148246,0.0
 0097540,0.01387250,-0.01145357,-0.00198071,-0.13788733,0.15731065,0.00
 001818,0.00000528,-0.00004938,-0.00000087,0.00000012,0.00001336,-0.000
 02177,-0.00009099,0.00052678,-0.00000205,0.00004020,-0.00014578,0.0003
 1797,0.00016068,0.00100801,0.00588378,-0.00449769,-0.04723188,0.000575
 51,-0.00077841,-0.00237343,0.00000018,-0.00000037,0.00000884,-0.000003
 88,-0.00000998,-0.00001825,0.00000324,0.00000337,0.00000134,-0.0000009
 7,0.00000166,0.00000293,0.00000202,-0.00000049,-0.00000085,-0.00000136
 ,-0.00000077,-0.00000053,-0.00000619,-0.00000526,-0.00000113,0.0000066
 1,0.00000328,-0.00000370,-0.00000104,0.00000237,-0.00000068,-0.0000055
 2,0.00000519,-0.00005068,0.02238119,-0.01546480,0.00014398,-0.02251346
 ,0.01561688,0.00185562,-0.00658557,0.00498964,0.04633142,-0.00037831,0
 .00043684,-0.00087972,-0.00020669,-0.00015067,0.00000465,0.00490449,0.
 00614397,0.00138561,-0.00052227,-0.00289337,0.00012831,-0.01150778,0.0
 2351960,0.02451159,-0.00240882,-0.01664669,-0.02423038,-0.05219504,-0.
 02130553,-0.03040650,0.00001734,-0.00006237,0.00000354,0.00004720,0.00
 012267,-0.00006693,-0.00002872,-0.00002165,-0.00004289,-0.00000512,-0.
 00000141,0.00001016,-0.00001448,-0.00001044,-0.00000123,-0.00001117,-0
 .00000282,-0.00000944,-0.00006527,0.00002254,-0.00004723,-0.00004956,0
 .00000858,0.00004547,-0.00007249,-0.00006148,0.00000577,-0.00002272,-0
 .00020283,0.00010085,-0.00461101,-0.00338995,0.00088323,0.00121817,0.0
 0057296,0.00065852,0.00070110,0.00089248,0.00007348,0.06347333,0.00041
 993,-0.00024638,0.00008277,0.00004935,-0.00000536,0.00001891,-0.004786
 09,-0.00244143,-0.00007189,0.00049159,0.00195809,0.00021525,0.01290382
 ,-0.02033145,-0.01753150,-0.00321553,-0.00871920,-0.01346743,-0.018058
 58,-0.13238527,-0.11627109,0.00003936,0.00005762,0.00005952,-0.0000475
 9,-0.00011730,0.00005302,0.00003279,0.00000325,0.00001797,-0.00000186,
 0.00000093,0.00000698,0.00001749,0.00000354,-0.00000096,0.00000770,0.0
 0000726,0.00001981,0.00001413,-0.00000912,0.00003504,0.00003187,-0.000
 01807,-0.00004871,0.00006816,0.00006102,-0.00004167,0.00001956,0.00021
 348,-0.00010299,-0.00274686,-0.00057899,0.00021397,0.00091850,0.000164
 38,-0.00004394,-0.00020402,0.00058739,0.00002122,0.01317681,0.14960112
 ,0.00024476,0.00021379,-0.00044259,-0.00007073,0.00004184,-0.00000940,
 -0.00259909,-0.00348250,0.00076304,-0.00095995,0.00226282,0.00052451,0
 .00630263,-0.00039061,0.00545307,-0.00014063,0.00279565,0.00364393,-0.
 02454105,-0.11933136,-0.22833675,0.00002867,0.00003335,0.00005389,0.00
 001175,-0.00005751,-0.00001101,0.00000238,0.00002250,-0.00000719,0.000
 00384,0.00000816,0.00001032,0.00001009,0.00000854,0.00000063,0.0000016
 3,-0.00000135,0.00000496,-0.00001742,0.00001267,-0.00000742,-0.0000019
 4,-0.00000629,-0.00000531,0.00002311,0.00001647,0.00000634,0.00000875,
 0.00005967,-0.00001672,0.00082931,0.00099101,0.00152463,-0.00047904,-0
 .00024976,0.00090875,-0.00080947,-0.00032914,0.00001626,0.02581849,0.1
 3217501,0.23757013,-0.00042697,0.00041264,0.00095081,-0.00020908,-0.00
 014605,-0.00004437,0.00495270,0.00629170,-0.00161533,-0.00043649,-0.00
 307108,-0.00004021,-0.01363139,0.02335685,-0.02329601,-0.00057785,-0.0
 1666701,0.02455858,-0.04923418,-0.01265198,0.01757395,0.00001806,-0.00
 005895,-0.00003373,0.00012606,0.00015212,0.00006944,-0.00006242,-0.000
 05685,-0.00006179,0.00000252,-0.00001659,0.00001366,-0.00002147,-0.000
 00890,0.00000069,0.00000643,0.00000128,0.00000357,-0.00005642,0.000015
 99,-0.00003999,-0.00005596,0.00001930,0.00005719,-0.00005225,-0.000025
 40,0.00000441,-0.00001222,-0.00018329,-0.00008814,0.00120697,0.0006107
 4,-0.00068700,-0.00471069,-0.00344890,-0.00041838,0.00073468,0.0009084
 6,-0.00012359,0.00176299,0.00080322,-0.00369315,0.06071533,0.00044433,
 -0.00027872,-0.00015779,0.00006812,0.00002653,-0.00000204,-0.00475684,
 -0.00241926,0.00035692,0.00045435,0.00195346,-0.00028954,0.01411896,-0
 .02027028,0.01670244,-0.00221967,-0.00863917,0.01369108,-0.00968446,-0
 .13137742,0.11676536,0.00001841,0.00005916,-0.00005090,-0.00008776,-0.
 00010772,-0.00004983,0.00007532,0.00001611,0.00004545,-0.00001488,0.00
 000592,-0.00001234,0.00002023,0.00000601,0.00000639,0.00000363,0.00000
 171,-0.00000472,0.00004477,-0.00002852,0.00004590,0.00001347,-0.000005
 53,-0.00003916,0.00003882,0.00003130,-0.00001785,0.00001006,0.00019066
 ,0.00012498,0.00092972,0.00018313,-0.00002967,-0.00276361,-0.00058657,
 -0.00000599,-0.00021399,0.00057866,-0.00000006,-0.00023121,0.01225777,
 -0.01476677,0.00367720,0.14843400,-0.00023452,-0.00022497,-0.00048065,
 0.00007839,-0.00005287,-0.00001401,0.00234092,0.00309628,0.00071019,0.
 00101886,-0.00209052,0.00048849,-0.00502508,-0.00115002,0.00750626,0.0
 0043557,-0.00155364,0.00178551,0.01173816,0.11994471,-0.23218570,-0.00
 001936,-0.00003557,0.00004094,-0.00002395,0.00003631,-0.00002621,-0.00
 003013,0.00000243,-0.00002722,0.00000372,-0.00001321,0.00000442,-0.000
 00810,-0.00000295,-0.00000136,0.00000246,0.00000145,0.00000462,0.00000
 342,0.00000591,-0.00000311,0.00001684,-0.00001033,-0.00001093,-0.00002
 546,-0.00000710,-0.00000103,-0.00000550,-0.00004854,-0.00000580,0.0004
 5990,0.00021942,0.00093028,-0.00035698,-0.00072875,0.00161705,0.000761
 01,0.00026683,-0.00003970,0.00203101,0.01463048,-0.02164571,-0.0131357
 7,-0.13227829,0.24131057,-0.00004822,-0.00100335,-0.00016715,-0.023317
 92,-0.00596262,0.00063669,-0.00020086,-0.00078317,-0.00004751,0.000220
 97,0.00049820,0.00001182,-0.00010516,0.00046845,0.00001837,-0.00000875
 ,0.00000077,-0.00000095,0.00027946,-0.00005502,-0.00000343,-0.27556261
 ,-0.08132700,0.00689903,0.00028246,-0.00092495,-0.00007247,0.00069126,
 0.00039745,-0.00053563,-0.00036104,0.00001545,-0.00012791,-0.00003991,
 -0.00010471,0.00038566,0.00058878,0.00001275,-0.00018989,-0.00390922,-
 0.00198740,-0.00119851,-0.00134538,-0.00101240,0.00099069,-0.00006011,
 -0.00107424,-0.00049312,-0.00101642,0.00293810,0.00046735,0.00001756,-
 0.00000960,0.00001298,0.00001558,-0.00000962,-0.00001317,-0.00001637,0
 .00001589,0.00000100,-0.00003866,0.00003849,0.00001319,-0.00003589,0.0
 0003709,-0.00001280,0.29957745,-0.00007203,0.00038615,-0.00010399,0.02
 684757,0.01032697,-0.00061238,0.00032072,0.00068019,0.00009675,-0.0001
 8293,-0.00021005,-0.00001185,0.00006209,-0.00045124,-0.00004330,0.0000
 0281,0.00000128,0.00000233,-0.00024539,0.00000367,0.00000916,-0.085312
 32,-0.08093720,0.00262230,0.00036058,-0.00172002,-0.00010142,-0.000133
 56,-0.00000069,0.00008772,0.00002307,-0.00005250,0.00000736,0.00002553
 ,0.00002862,-0.00003850,-0.00009719,-0.00005409,-0.00008870,-0.0155098
 9,-0.00673681,-0.00128812,-0.01938224,-0.00856811,0.00228335,-0.000562
 41,-0.00125998,-0.00081260,0.00297276,-0.00339744,-0.00017001,-0.00001
 178,0.00000636,-0.00000733,-0.00000964,0.00000658,0.00000636,0.0000086
 3,-0.00000947,-0.00000085,0.00003746,-0.00003490,-0.00000885,0.0000368
 9,-0.00003262,0.00000631,0.09009345,0.09311579,-0.00012002,-0.00015091
 ,-0.00014990,0.00260160,0.00149801,-0.00047584,-0.00004310,0.00016902,
 -0.00008522,-0.00002985,-0.00009210,0.00004346,-0.00001457,-0.00004414
 ,0.00000673,-0.00000259,0.00000046,-0.00001550,-0.00003277,0.00000322,
 0.00002421,0.00639742,0.00221005,-0.04822380,0.00045925,-0.00033018,-0
 .00009247,-0.00009359,-0.00002778,-0.00002919,0.00022393,0.00008289,-0
 .00003061,-0.00000892,0.00007527,-0.00017797,-0.00042750,-0.00006684,0
 .00003960,-0.02795428,-0.01162670,-0.00178578,0.02576476,0.01099215,-0
 .00285237,-0.00010685,-0.00009312,0.00024144,0.00023848,-0.00049754,0.
 00138983,0.00000145,0.00000160,0.00000265,-0.00000326,-0.00000008,0.00
 000586,0.00000149,-0.00000150,0.00000245,-0.00000013,0.00000122,-0.000
 00190,0.00001028,-0.00000970,-0.00000020,-0.00640046,-0.00197300,0.057
 45545,0.00016172,0.00099701,0.00076165,0.00036311,-0.00002558,-0.00008
 995,-0.00040634,-0.00026360,0.00051018,-0.00041463,0.00009076,0.000412
 03,0.00014578,0.00000174,-0.00009623,0.00000281,-0.00000918,-0.0000045
 0,-0.00009146,0.00004601,0.00000077,0.00009406,-0.00001856,0.00006535,
 0.00946322,-0.00286961,0.00910892,-0.15815831,0.03113299,-0.13250850,-
 0.01301485,0.00783072,-0.02389923,-0.00376531,-0.00430950,0.00031214,-
 0.00039535,-0.00036513,0.00070722,-0.00006410,0.00008266,-0.00008482,-
 0.00003527,0.00002170,0.00004959,0.00056262,-0.00281144,0.00147369,0.0
 0001063,0.00007585,-0.00005639,-0.00000351,0.00000416,0.00000190,0.000
 00051,0.00000616,-0.00000093,0.00001057,-0.00000213,0.00000014,0.00001
 231,-0.00000787,-0.00000634,-0.00000903,0.00000071,0.00000088,-0.00003
 269,0.00000048,-0.00000971,0.16546170,0.00223511,-0.00167019,-0.001820
 77,-0.00052475,-0.00047463,-0.00013365,-0.00004008,0.00100110,0.000239
 59,-0.00003080,-0.00048548,-0.00012465,0.00008522,-0.00025856,0.000046
 43,0.00001562,-0.00000971,0.00000798,-0.00004063,0.00007434,0.00003771
 ,0.00000355,0.00004963,-0.00000574,0.01122882,-0.00030130,0.01346659,0
 .03143072,-0.05846403,0.05733997,-0.00750686,0.00618048,-0.00964777,-0
 .00403845,0.00403180,0.00254700,-0.00034801,-0.00066335,-0.00007428,-0
 .00003089,-0.00007868,0.00009342,-0.00004324,0.00000458,0.00003692,-0.
 00327592,0.00234115,0.00464934,-0.00003451,-0.00012923,0.00014188,-0.0
 0000929,-0.00000321,-0.00000533,-0.00000497,0.00000051,0.00000099,0.00
 000986,-0.00000041,-0.00000230,0.00000756,-0.00000768,-0.00001311,0.00
 002139,0.00000246,0.00000883,-0.00000438,0.00007063,0.00003793,-0.0310
 8505,0.05159164,-0.00007826,-0.00256081,-0.00007833,0.00011705,0.00034
 670,0.00015397,0.00112868,0.00255306,-0.00038113,-0.00063861,-0.001193
 35,0.00082557,-0.00036602,-0.00056996,-0.00008499,0.00001197,-0.000003
 47,-0.00000191,0.00019342,-0.00004909,-0.00001717,-0.00013868,-0.00004
 413,-0.00000913,-0.01561901,0.00435391,-0.01428637,-0.13091415,0.05651
 191,-0.21595759,0.00150251,0.00046672,0.00348285,-0.00059217,0.0023522
 0,0.00305126,0.00073401,-0.00008895,0.00005648,0.00008160,-0.00001658,
 -0.00000600,0.00003842,-0.00003058,-0.00006712,0.00187518,0.00502499,-
 0.00069276,0.00001473,0.00002152,-0.00004849,-0.00000178,-0.00000739,-
 0.00000327,-0.00000624,-0.00001276,0.00000607,-0.00001088,0.00000575,0
 .00000060,0.00000570,0.00001695,-0.00000254,0.00001490,0.00000463,0.00
 001680,0.00005682,-0.00002613,-0.00004357,0.14277863,-0.06484750,0.225
 29999,0.00012708,-0.00073357,0.00107563,-0.00042657,0.00004600,0.00001
 956,0.00021854,-0.00046196,-0.00000312,-0.00005840,0.00029562,-0.00003
 333,-0.00018966,0.00013348,0.00000419,-0.00001039,0.00001267,-0.000000
 20,0.00006631,-0.00007037,0.00000515,-0.00005828,0.00001418,0.00006842
 ,-0.00416033,-0.00324148,-0.00183050,-0.00506804,-0.01708090,0.0239147
 3,-0.08624166,-0.05680584,0.06330655,0.01053243,0.01190670,-0.01519583
 ,-0.00121640,-0.00079636,-0.00413678,0.00003410,-0.00002454,0.00003582
 ,0.00003422,-0.00002554,-0.00003939,-0.00106632,0.00022182,-0.00065709
 ,-0.00003274,-0.00011025,-0.00015757,0.00000350,-0.00000425,0.00000231
 ,0.00000479,-0.00000093,-0.00000424,-0.00001022,0.00000078,0.00000137,
 -0.00001046,0.00000853,0.00000343,-0.00001415,0.00001192,-0.00000867,0
 .00000054,0.00000747,0.00000020,0.00044449,0.00151226,0.00040659,0.086
 43181,0.00032029,-0.00003299,0.00044141,-0.00018016,0.00003985,0.00000
 215,0.00016430,-0.00002575,-0.00004697,-0.00007914,0.00000649,-0.00003
 069,-0.00018179,0.00002169,0.00000272,-0.00000586,0.00000923,0.0000024
 4,0.00005736,-0.00004200,0.00000532,-0.00000020,-0.00000533,0.00000669
 ,-0.00377380,0.00489774,0.00160465,-0.00238398,-0.00309605,0.00888026,
 -0.05689774,-0.13261759,0.12741900,-0.00296344,-0.00045101,0.00380955,
 -0.00031012,0.00504401,0.00286080,0.00002133,-0.00002763,0.00005385,0.
 00003809,-0.00001006,-0.00002418,0.00023949,-0.00023788,-0.00051550,-0
 .00000200,-0.00005363,-0.00005179,0.00000136,-0.00000503,-0.00000138,0
 .00000194,-0.00000248,-0.00000075,-0.00000774,0.00000109,0.00000069,-0
 .00000490,0.00000726,-0.00000159,-0.00000492,0.00000930,-0.00000101,0.
 00000127,0.00000153,0.00001659,0.00102868,-0.00238307,-0.00211979,0.06
 345280,0.13206912,-0.00008878,0.00004220,0.00010550,0.00008325,-0.0000
 6207,-0.00003895,-0.00012758,0.00016998,-0.00002741,0.00007883,-0.0001
 2581,-0.00002131,0.00013143,-0.00006467,-0.00000139,0.00000588,-0.0000
 0645,0.00000027,-0.00005605,0.00004722,0.00000262,0.00001138,-0.000021
 24,-0.00001047,-0.00159839,0.00191109,0.00309012,-0.00154798,-0.001058
 18,0.00384392,0.06343918,0.12727197,-0.21095261,0.01028820,0.01376470,
 -0.01374602,-0.00489809,0.00257859,-0.00093853,-0.00000700,-0.00000354
 ,-0.00000328,0.00000169,0.00000023,0.00000260,-0.00052995,-0.00058615,
 0.00008155,0.00000602,0.00002452,-0.00001608,-0.00000286,0.00000179,-0
 .00000117,-0.00000324,0.00000152,0.00000158,0.00000772,-0.00000151,-0.
 00000051,0.00000586,-0.00000404,-0.00000489,0.00000690,-0.00000498,0.0
 0000500,0.00000909,-0.00001699,-0.00000603,0.00108112,-0.00177371,-0.0
 0030876,-0.06738870,-0.14046493,0.22015003,-0.00001143,0.00029904,0.00
 020000,-0.00000051,0.00005168,0.00004778,0.00020147,-0.00001664,-0.000
 07660,-0.00011057,0.00002263,0.00005680,-0.00022279,0.00003226,0.00000
 306,-0.00000740,0.00000891,0.00000092,0.00008367,-0.00006033,-0.000005
 95,0.00000831,-0.00000080,0.00000335,0.00040137,0.00052886,-0.00002618
 ,0.00042390,-0.00007851,-0.00437075,-0.01351914,-0.00769005,0.00214900
 ,-0.29618243,-0.09838703,-0.00746256,-0.00584995,-0.00228626,-0.001905
 51,0.00000709,-0.00000215,0.00001513,0.00001597,0.00000367,-0.00000928
 ,0.00208091,-0.00257321,0.00091779,-0.00000763,-0.00001474,-0.00002672
 ,0.00000358,-0.00000326,0.00000053,0.00000299,-0.00000435,-0.00000025,
 -0.00001131,0.00000243,0.00000014,-0.00000675,0.00000849,0.00000463,-0
 .00000553,0.00000701,-0.00000221,-0.00001965,0.00001364,0.00001686,-0.
 00075211,-0.00044134,0.00011082,0.00036004,0.00144804,0.00036854,0.313
 22618,0.00025062,-0.00071018,-0.00053339,-0.00015546,0.00002799,-0.000
 07454,0.00013153,0.00004666,0.00008351,-0.00004117,-0.00001969,-0.0000
 2198,-0.00003837,-0.00002641,0.00001048,0.00000068,-0.00000061,-0.0000
 0017,0.00003094,-0.00000574,0.00000312,-0.00001594,0.00001871,-0.00001
 116,0.00055817,-0.00068747,0.00009243,-0.00055706,0.00468452,0.0035819
 0,0.00720547,0.00554443,0.00010923,-0.09848338,-0.07882592,0.00813339,
 -0.01700902,-0.00282227,-0.00200579,0.00000622,-0.00000367,0.00001397,
 -0.00000699,0.00001485,0.00002095,-0.00207721,0.00323124,0.00561545,-0
 .00000757,-0.00003895,0.00004581,0.00000008,-0.00000212,-0.00000124,0.
 00000101,-0.00000089,0.00000024,-0.00000163,0.00000152,0.00000014,-0.0
 0000090,0.00000118,-0.00000198,-0.00000186,0.00000319,-0.00000036,-0.0
 0000513,0.00003154,0.00000984,0.00031144,0.00021979,0.00013474,0.00095
 718,-0.00231293,-0.00199264,0.10827208,0.07413075,0.00019353,-0.000537
 87,-0.00012401,-0.00011804,0.00002052,-0.00001741,0.00007335,0.0002207
 9,0.00003035,-0.00005758,-0.00010626,0.00004578,0.00000208,-0.00005272
 ,-0.00000274,0.00000210,-0.00000188,-0.00000021,0.00001061,0.00000382,
 -0.00000439,-0.00002896,0.00000899,0.00000328,0.00001808,0.00020666,-0
 .00125349,-0.00360715,0.00383309,-0.00197017,-0.02322979,-0.01001114,0
 .00426867,-0.00757204,0.00814995,-0.05475156,0.02360657,0.00814563,0.0
 0485814,0.00002174,0.00000244,-0.00000674,-0.00000083,-0.00001095,-0.0
 0002003,0.00011210,0.00526161,-0.00185012,-0.00000234,-0.00002162,0.00
 000907,-0.00000026,-0.00000032,-0.00000084,-0.00000112,-0.00000051,0.0
 0000101,0.00000058,0.00000045,0.00000040,0.00000169,0.00000023,-0.0000
 0090,0.00000267,-0.00000077,0.00000179,0.00002114,0.00000226,-0.000023
 89,-0.00116906,-0.00041676,0.00005664,0.00122234,-0.00168523,-0.000174
 98,0.00910327,-0.01146868,0.05094844,-0.00022271,0.00052985,-0.0010593
 6,-0.00026527,0.00008794,0.00010915,0.00011487,-0.00045710,-0.00010266
 ,-0.00007434,0.00018077,0.00002718,-0.00033324,0.00013811,0.00004278,-
 0.00001431,0.00002134,-0.00000104,0.00009001,-0.00009362,-0.00000327,-
 0.00003989,0.00002647,-0.00005546,-0.00356936,-0.00433932,0.00011587,-
 0.00052309,-0.00038399,0.00085798,0.00099914,-0.00307056,0.00111797,0.
 01028364,-0.00241953,0.00941452,-0.15482479,0.02685452,-0.13036168,0.0
 0006089,-0.00003971,0.00003755,0.00002974,-0.00003134,-0.00008947,-0.0
 1285016,0.00759699,-0.02422208,-0.00001542,-0.00008298,0.00008615,0.00
 000496,-0.00000321,0.00000223,0.00000275,-0.00000682,0.00000030,-0.000
 01482,-0.00000029,-0.00000029,-0.00001444,0.00001718,0.00000594,-0.000
 01025,0.00001110,-0.00000134,0.00000107,0.00001861,-0.00001959,-0.0000
 7764,0.00036580,0.00010323,0.00034941,-0.00025626,0.00046818,0.0003000
 1,0.00154498,0.00026764,0.16022745,-0.00020441,0.00026981,-0.00029187,
 0.00002419,0.00011198,-0.00002500,-0.00013780,0.00002185,0.00006078,0.
 00000035,-0.00004822,-0.00003931,-0.00003014,0.00001379,0.00001893,-0.
 00000158,0.00000370,-0.00000210,-0.00001330,0.00000161,0.00001228,-0.0
 0009054,-0.00004701,-0.00004153,-0.00392897,0.00412389,0.00236700,-0.0
 0034040,-0.00081150,-0.00006467,-0.00356744,0.00283373,0.00488084,0.01
 211658,-0.00008670,0.01352323,0.02705263,-0.05452220,0.05294097,0.0000
 2610,-0.00002124,0.00001142,0.00002383,-0.00000011,-0.00002928,-0.0071
 1940,0.00531291,-0.00975010,0.00000572,-0.00001186,0.00000095,-0.00000
 125,-0.00000110,-0.00000201,-0.00000062,0.00000100,0.00000131,-0.00000
 026,-0.00000167,0.00000055,0.00000218,-0.00000110,-0.00000206,0.000000
 61,0.00000005,-0.00000065,0.00001713,0.00003744,-0.00001273,0.00034575
 ,-0.00074893,-0.00051141,0.00051200,0.00000899,0.00077046,0.00104367,-
 0.00236125,-0.00207012,-0.02724614,0.04834579,0.00015936,0.00009257,0.
 00007865,-0.00001633,0.00012458,-0.00004612,0.00008727,0.00002814,-0.0
 0001773,-0.00006873,-0.00003434,0.00000827,-0.00015215,0.00001085,0.00
 001068,-0.00000418,0.00000671,-0.00000050,0.00005184,-0.00003361,-0.00
 000226,-0.00006984,-0.00003970,-0.00001578,-0.00027951,0.00213785,0.00
 313649,0.00081238,-0.00009569,0.00003091,0.00196203,0.00516278,-0.0007
 5205,-0.01614428,0.00317567,-0.01392880,-0.13033944,0.05322625,-0.2194
 1550,0.00000917,-0.00001033,0.00001784,0.00002367,0.00000927,-0.000011
 24,0.00123781,0.00027632,0.00299033,0.00000045,-0.00002676,-0.00001976
 ,0.00000154,-0.00000259,-0.00000109,0.00000138,-0.00000319,0.00000142,
 -0.00000691,0.00000111,0.00000008,-0.00000304,0.00000513,0.00000112,-0
 .00000304,0.00000441,-0.00000016,-0.00000861,0.00004863,0.00000193,0.0
 0008324,-0.00046040,-0.00029661,-0.00085559,0.00026658,-0.00076245,0.0
 0109574,-0.00170766,-0.00015056,0.14210138,-0.06011813,0.22932878,0.00
 042089,-0.00032472,0.00003573,0.00047732,0.00121337,0.00028770,-0.0004
 8098,0.00008541,0.00008375,0.00013782,-0.00010182,-0.00002798,0.000343
 88,0.00000683,0.00000401,0.00000019,-0.00002187,-0.00001421,-0.0001055
 6,0.00003576,-0.00000441,-0.00594039,-0.00246658,-0.00099715,-0.000025
 31,0.00005900,-0.00007932,0.00000636,0.00004791,-0.00004814,-0.0000038
 0,-0.00000132,-0.00002260,0.00001098,-0.00001126,0.00001933,0.00006544
 ,0.00000329,-0.00000560,-0.27076865,-0.08569509,-0.00283417,0.00033842
 ,0.00018814,0.00056798,-0.00001192,-0.00009317,0.00001212,0.00048911,-
 0.00050771,-0.00006289,0.00000675,0.00000433,0.00001693,0.00000136,0.0
 0000041,-0.00000860,0.00000988,0.00000848,0.00000210,0.00001450,-0.000
 00490,0.00000434,0.00001277,-0.00001277,-0.00000216,0.00146982,-0.0002
 4715,-0.00115030,-0.00000511,0.00001164,0.00001069,-0.00000382,-0.0000
 0604,0.00000515,-0.00001044,0.00000118,0.00000443,-0.00000944,0.000008
 66,-0.00000032,0.29419249,0.00028472,-0.00003337,-0.00000319,-0.001885
 40,0.00062060,0.00073457,-0.00020323,-0.00025378,-0.00001418,0.0000902
 7,0.00013690,-0.00000005,0.00014183,0.00009087,0.00004455,-0.00001176,
 -0.00001638,-0.00002995,0.00004266,-0.00003413,-0.00000799,-0.01616653
 ,-0.00750362,-0.00039403,-0.00011372,0.00000865,-0.00005035,0.00012313
 ,0.00003660,-0.00005312,-0.00004387,0.00000174,-0.00003436,0.00001867,
 -0.00001779,0.00006771,0.00013135,0.00001410,-0.00002210,-0.08528140,-
 0.08118866,-0.00071910,0.00069791,0.00032370,0.00098210,0.00000337,-0.
 00010037,-0.00006820,0.00070768,-0.00038010,-0.00034281,0.00002344,-0.
 00000141,0.00002031,0.00000506,-0.00000389,-0.00000388,-0.00000400,0.0
 0001704,0.00000672,-0.00000121,0.00001237,0.00000884,-0.00000498,-0.00
 000183,-0.00000483,0.00002259,-0.00096767,-0.00320717,-0.00001744,0.00
 000836,0.00001612,0.00000518,0.00000393,0.00000382,-0.00000529,-0.0000
 0030,0.00000544,0.00000705,0.00000417,-0.00000253,0.09554581,0.0851502
 4,0.00012372,0.00009065,-0.00007934,-0.00115909,0.00096161,0.00099509,
 0.00012389,-0.00011958,-0.00004993,-0.00000571,0.00005550,0.00001732,-
 0.00005289,0.00000057,-0.00002684,-0.00000079,0.00000623,0.00001803,0.
 00002709,-0.00001109,0.00000644,-0.02796085,-0.01043246,-0.00135640,-0
 .00008915,-0.00007101,-0.00004148,0.00012269,0.00008974,-0.00006454,-0
 .00012383,-0.00000597,-0.00001839,-0.00000484,-0.00004085,0.00010218,0
 .00018073,0.00003054,-0.00003390,-0.00245555,-0.00025876,-0.04811320,-
 0.00113173,-0.00057069,0.00204197,-0.00003528,-0.00016811,-0.00007543,
 0.00062460,-0.00023481,0.00001962,-0.00000299,-0.00000600,-0.00000129,
 0.00000367,-0.00000227,-0.00000935,-0.00000255,0.00000190,-0.00000255,
 -0.00000482,-0.00000018,-0.00000209,-0.00000276,0.00000913,-0.00000092
 ,-0.00058244,-0.00283360,-0.00473128,0.00001288,-0.00002871,0.00001626
 ,0.00000127,-0.00001042,0.00000014,-0.00000375,-0.00000415,0.00000618,
 0.00000272,0.00000092,-0.00000347,0.00420343,0.00388007,0.05148687,0.0
 0019883,0.00000720,-0.00014000,-0.00003932,-0.00014417,0.00052354,-0.0
 0000390,0.00014110,-0.00002542,-0.00003009,-0.00008536,0.00000847,-0.0
 0003268,-0.00002421,-0.00004465,0.00000354,0.00000749,0.00001619,-0.00
 003363,0.00001623,0.00002035,-0.00054878,0.00434078,-0.00483582,0.0000
 9019,0.00008795,0.00004858,-0.00002027,-0.00001523,0.00006235,-0.00002
 610,-0.00000499,0.00001706,-0.00002942,-0.00000284,-0.00000804,-0.0000
 2246,0.00000260,-0.00000135,-0.05291178,-0.01921315,0.02586154,0.00010
 336,-0.00064677,-0.00102120,-0.00003053,0.00002894,-0.00001190,-0.0000
 4389,-0.00012110,0.00009967,-0.00001157,-0.00000725,-0.00000038,-0.000
 00037,0.00000033,-0.00001076,0.00000330,-0.00000329,-0.00000314,0.0000
 0337,-0.00000567,-0.00000796,0.00000240,0.00001189,0.00000078,0.000147
 94,0.00051526,0.00010548,0.00002226,-0.00000179,-0.00000897,-0.0000006
 0,-0.00001446,-0.00000227,-0.00000069,-0.00000439,-0.00000377,-0.00000
 241,-0.00000324,-0.00000096,-0.00269016,-0.01851084,0.02513647,0.05192
 894,-0.00035661,0.00033400,0.00024042,0.00020071,0.00112754,-0.0006801
 2,0.00042789,-0.00024302,-0.00005793,-0.00008716,0.00018150,0.00001044
 ,-0.00022960,0.00000170,-0.00000598,-0.00000297,0.00001177,0.00000712,
 0.00007973,-0.00004798,0.00000967,0.00324245,0.01057493,-0.01449472,-0
 .00011562,-0.00001672,-0.00001890,0.00003136,-0.00002104,0.00001820,-0
 .00001785,-0.00000925,0.00000008,0.00002825,-0.00000245,0.00000410,0.0
 0001710,-0.00000359,0.00000203,-0.01958317,-0.14347777,0.12562393,-0.0
 0034848,-0.00172981,-0.00261662,0.00001633,0.00004402,-0.00004949,0.00
 003875,-0.00002174,0.00001922,-0.00000022,-0.00000808,-0.00000061,0.00
 000260,-0.00000369,-0.00000465,-0.00000919,0.00000163,-0.00000011,-0.0
 0001108,0.00000722,-0.00000125,-0.00000922,0.00001152,-0.00000115,0.00
 020619,0.00080169,0.00097530,-0.00000112,-0.00000931,0.00000531,0.0000
 1040,0.00001601,-0.00000484,0.00000902,0.00000526,0.00000383,0.0000100
 4,0.00000326,0.00000630,-0.00046808,-0.00732179,0.00783950,0.02163290,
 0.15327560,0.00001379,-0.00064039,0.00038510,-0.00045453,0.00207517,0.
 00046850,0.00012270,-0.00010656,-0.00022823,-0.00002525,-0.00003248,0.
 00005564,-0.00008356,-0.00001685,0.00005061,-0.00000184,0.00000422,-0.
 00001682,0.00003591,-0.00001729,-0.00001456,0.00446416,0.01601314,-0.0
 2069937,-0.00005991,-0.00009069,-0.00001915,-0.00003068,0.00004338,-0.
 00001504,-0.00006883,-0.00002048,0.00005624,-0.00000638,-0.00000489,0.
 00001092,0.00004665,-0.00002981,0.00001908,0.02553077,0.12398481,-0.21
 078307,-0.00140000,-0.00460181,-0.00432192,0.00003888,0.00003608,-0.00
 013755,0.00007061,-0.00008440,-0.00017765,0.00000555,0.00000338,-0.000
 00030,-0.00000348,-0.00000347,0.00001062,-0.00000428,-0.00000119,0.000
 00221,-0.00000514,0.00000614,0.00000373,-0.00000246,-0.00000805,0.0000
 0322,-0.00044631,0.00022741,0.00104729,0.00003414,-0.00006413,0.000027
 47,-0.00000146,-0.00000748,-0.00000210,0.00000563,-0.00000257,0.000007
 51,0.00001490,0.00001132,0.00001239,0.00063868,-0.00110710,0.00124851,
 -0.02730176,-0.13461315,0.23069909,0.00030869,-0.00045700,0.00025129,0
 .00015820,0.00044498,-0.00078850,-0.00016791,-0.00007590,0.00024794,0.
 00002280,0.00002277,-0.00006899,0.00004302,0.00008727,0.00000653,-0.00
 001059,-0.00000887,-0.00001728,0.00004952,-0.00003377,-0.00000217,0.00
 399512,-0.00610514,-0.00183841,-0.00000591,0.00008654,-0.00017854,0.00
 004748,0.00001672,0.00003170,-0.00000461,-0.00000043,-0.00000729,0.000
 00067,0.00000060,0.00000621,-0.00000905,0.00001369,-0.00000734,-0.1532
 2056,0.12661641,0.01405123,-0.00005759,-0.00012272,0.00009211,-0.00001
 445,0.00001494,-0.00000759,0.00041249,-0.00027855,-0.00018187,0.000016
 27,-0.00000312,0.00001327,0.00000516,-0.00000392,-0.00000355,-0.000005
 34,0.00001263,0.00000447,-0.00000434,0.00001233,0.00000743,-0.00000256
 ,-0.00000019,-0.00000319,0.00058180,0.00005887,0.00064181,-0.00000017,
 -0.00000842,0.00000026,0.00000631,0.00000294,-0.00000370,0.00000585,0.
 00000163,-0.00000027,0.00000479,-0.00000423,0.00000142,-0.01853899,0.0
 2390806,0.00196214,0.00297356,-0.00448184,-0.00130432,0.16311123,0.001
 32180,-0.00037184,-0.00026768,-0.00237923,-0.00100880,-0.00317076,-0.0
 0107368,0.00054019,0.00056876,0.00022726,-0.00049395,-0.00013317,0.000
 56582,-0.00004857,-0.00006297,0.00000935,-0.00002767,-0.00000180,-0.00
 021575,0.00010958,-0.00000235,0.01055505,-0.01313568,-0.00162838,0.000
 20591,0.00012900,-0.00011601,-0.00008183,0.00005230,-0.00002010,-0.000
 01969,-0.00001457,-0.00000358,-0.00007030,-0.00001547,0.00002254,-0.00
 003047,0.00005129,-0.00000698,0.12692438,-0.20010281,-0.01533530,-0.00
 008505,0.00070312,0.00143969,-0.00011650,-0.00009295,0.00007160,0.0001
 2770,0.00005838,0.00014954,-0.00000331,0.00000910,0.00000737,-0.000003
 87,0.00000880,-0.00000566,0.00002412,-0.00000007,-0.00000026,0.0000308
 5,-0.00001780,0.00000004,0.00002494,-0.00002079,0.00000286,-0.00034615
 ,-0.00004278,0.00037137,0.00002508,0.00002105,-0.00002558,-0.00001775,
 -0.00003019,0.00000643,-0.00001814,-0.00001777,-0.00000675,-0.00003052
 ,-0.00001819,-0.00002582,-0.00776352,0.01082806,0.00126379,0.01213339,
 -0.01440607,-0.00193902,-0.13945137,0.21641454,0.00145272,-0.00128211,
 0.00046990,-0.00261627,-0.00172074,-0.00486837,-0.00112118,0.00035969,
 0.00077011,0.00024814,-0.00049248,-0.00021584,0.00054167,0.00000965,-0
 .00005553,0.00000648,-0.00003302,-0.00001020,-0.00015647,0.00008016,-0
 .00001430,0.01942918,-0.02182175,-0.00456719,0.00015047,0.00008572,-0.
 00018014,-0.00012268,0.00006425,-0.00005892,-0.00002023,-0.00002079,0.
 00001197,-0.00003330,-0.00002250,0.00000678,-0.00002257,0.00004437,-0.
 00001115,0.01317755,-0.01471368,-0.04902172,0.00115228,-0.00081104,0.0
 0172750,-0.00009628,-0.00008532,0.00007467,0.00004071,0.00020826,-0.00
 003053,0.00000663,0.00001055,0.00000963,-0.00000197,0.00000717,-0.0000
 0320,0.00001749,0.00000579,0.00000246,0.00002496,-0.00001129,0.0000083
 9,0.00001989,-0.00002565,0.00000124,-0.00021565,0.00061587,0.00114571,
 0.00003256,-0.00001769,-0.00001132,-0.00001792,-0.00001376,0.00000238,
 -0.00000694,-0.00000488,-0.00000016,-0.00002829,-0.00001288,-0.0000125
 4,0.00015521,0.00051904,-0.00125933,-0.01794662,0.01895702,0.00307465,
 -0.01334888,0.01924551,0.05317195,0.00036831,-0.00033172,-0.00011360,0
 .00058638,0.00108278,-0.00008339,-0.00047702,0.00010556,-0.00004586,0.
 00013519,-0.00010811,0.00001253,0.00034449,0.00000122,-0.00002588,0.00
 000128,-0.00002092,0.00001253,-0.00010763,0.00003709,0.00001210,-0.002
 92955,-0.00158310,0.00098004,-0.00004226,0.00005672,0.00003048,-0.0000
 0293,0.00001815,-0.00002563,-0.00000774,-0.00001424,0.00000804,0.00001
 394,-0.00000182,0.00000312,0.00005250,-0.00003162,-0.00000239,0.000440
 17,0.00031357,-0.00037154,-0.26970035,-0.08621609,0.01382950,0.0000487
 4,-0.00001649,-0.00002002,0.00040402,-0.00049442,0.00002813,0.00000186
 ,0.00000069,0.00000890,0.00000457,0.00000379,-0.00001635,0.00001023,0.
 00000804,-0.00000249,0.00001318,-0.00001230,0.00000105,0.00001440,-0.0
 0000553,-0.00000475,0.00155764,-0.00007385,0.00047177,0.00000224,0.000
 00217,0.00001365,-0.00000634,-0.00000603,0.00000934,-0.00001298,0.0000
 0001,0.00000690,0.00000044,0.00001897,0.00000558,0.00032513,0.00025898
 ,0.00068326,0.00030763,0.00015174,0.00011134,-0.00007607,-0.00007778,-
 0.00000433,0.29260968,0.00027669,-0.00007430,-0.00001926,-0.00195571,0
 .00090463,-0.00062619,-0.00018846,-0.00023937,0.00003125,0.00008661,0.
 00012802,-0.00001242,0.00013456,0.00008584,-0.00004250,-0.00000884,-0.
 00001489,0.00002526,0.00003955,-0.00003210,0.00000615,-0.01971015,-0.0
 0932460,0.00153953,-0.00010777,-0.00003824,0.00004448,0.00010094,0.000
 01746,-0.00004420,-0.00002221,0.00001019,-0.00000095,0.00000790,0.0000
 0216,0.00002756,0.00008625,-0.00002401,0.00003841,0.00041884,0.0004341
 4,-0.00126788,-0.08583501,-0.08148218,0.00502463,0.00011742,0.00002373
 ,-0.00011867,0.00066761,-0.00033065,0.00019233,0.00000666,-0.00000446,
 0.00000715,0.00001909,-0.00000359,-0.00002201,-0.00000402,0.00001703,-
 0.00000507,-0.00000428,0.00000054,0.00000470,-0.00000128,0.00001160,-0
 .00000824,0.00026475,-0.00192067,0.00362104,-0.00001109,-0.00000272,0.
 00002012,0.00000301,0.00000125,0.00000406,-0.00000627,-0.00000587,0.00
 000713,0.00000565,0.00000584,-0.00000421,0.00037575,0.00056928,0.00037
 544,0.00019664,-0.00007955,-0.00011043,0.00012838,0.00005927,0.0000841
 6,0.09591723,0.08666114,-0.00016374,-0.00001978,-0.00008143,0.00092962
 ,-0.00109679,0.00076543,-0.00006069,0.00004476,-0.00003305,0.00000483,
 0.00000124,0.00001028,0.00003068,0.00001138,-0.00003036,0.00000120,-0.
 00000438,0.00002022,-0.00000749,0.00000211,0.00000636,0.02571067,0.009
 91659,-0.00281210,-0.00000141,0.00005783,0.00002264,-0.00006917,-0.000
 03209,0.00011137,0.00003693,-0.00002068,0.00002717,-0.00001094,0.00001
 851,-0.00004280,-0.00007063,-0.00003492,0.00008248,0.00131257,0.000277
 51,0.00185097,0.01357779,0.00457997,-0.04892003,0.00002876,0.00011420,
 -0.00021279,-0.00053199,0.00015984,0.00012120,-0.00000356,0.00000108,-
 0.00000818,0.00000455,0.00000394,-0.00000407,0.00000070,-0.00000030,-0
 .00000324,0.00000071,-0.00000662,-0.00000033,0.00000166,0.00000296,-0.
 00000277,0.00001337,0.00329065,-0.00401353,-0.00000060,-0.00000349,0.0
 0000685,0.00000289,-0.00000238,0.00000130,-0.00000144,-0.00000685,0.00
 000366,0.00001734,0.00001000,0.00000324,-0.00072110,-0.00023481,-0.000
 31634,-0.00038398,-0.00012935,0.00025722,-0.00002017,-0.00006581,-0.00
 009505,-0.01592521,-0.00904897,0.05178668,0.00020951,0.00006977,0.0001
 6125,-0.00006308,-0.00025276,-0.00043144,-0.00002200,0.00014287,0.0000
 0220,-0.00002394,-0.00008248,0.00000087,-0.00002766,-0.00001799,0.0000
 4401,0.00000106,0.00000523,-0.00002088,-0.00003231,0.00001542,-0.00001
 301,-0.00071015,0.00230074,0.00320014,0.00010704,0.00007883,-0.0000257
 3,-0.00003125,0.00000762,-0.00001815,0.00000507,-0.00000307,-0.0000182
 9,-0.00002625,-0.00000963,-0.00000210,-0.00004469,0.00001432,0.0000031
 3,0.00031232,-0.00023847,0.00053454,-0.05981478,-0.02594367,-0.0460940
 4,-0.00011905,0.00001902,0.00008772,-0.00003768,-0.00009045,-0.0001190
 7,0.00000191,0.00000028,0.00001043,-0.00001112,-0.00000546,0.00000278,
 0.00000304,-0.00000279,0.00000338,0.00000362,0.00001032,0.00000064,0.0
 0000441,-0.00000728,0.00000621,0.00020347,0.00047442,0.00001616,0.0000
 0471,0.00000798,-0.00001649,-0.00000360,-0.00000175,-0.00000500,0.0000
 0315,-0.00000006,-0.00000438,-0.00001920,-0.00002342,-0.00001105,0.000
 33552,0.00015175,0.00040564,0.00057780,-0.00007566,0.00018227,0.000093
 64,-0.00032565,-0.00028541,-0.00539237,-0.01482412,-0.02692263,0.05936
 880,-0.00033886,0.00025316,-0.00015403,0.00008918,0.00133809,0.0006339
 9,0.00040880,-0.00023277,0.00008327,-0.00008794,0.00015830,-0.00001087
 ,-0.00022951,0.00000098,0.00001246,-0.00000333,0.00001215,-0.00000593,
 0.00007800,-0.00004641,-0.00001677,0.00577267,0.01019326,0.01816942,-0
 .00001078,-0.00000697,-0.00000384,0.00001334,-0.00003346,0.00002313,0.
 00002539,0.00002113,0.00000481,0.00004574,0.00000902,-0.00002454,-0.00
 005332,0.00004888,-0.00005834,-0.00024897,-0.00270479,0.00286663,-0.02
 651997,-0.10983806,-0.10866173,-0.00004262,-0.00011345,0.00015023,0.00
 004411,-0.00004555,-0.00000183,0.00000152,-0.00000401,0.00000341,0.000
 00076,-0.00000672,0.00000056,-0.00000925,0.00000103,0.00000068,-0.0000
 0884,0.00000996,0.00000113,-0.00001192,0.00000757,0.00000174,0.0000084
 2,0.00085785,-0.00102399,-0.00000785,0.00000613,-0.00000345,0.00000893
 ,0.00000835,-0.00000400,0.00001413,0.00000466,-0.00001236,0.00002405,0
 .00001317,0.00001758,0.00017282,-0.00009935,0.00007015,0.00006717,0.00
 084592,0.00116299,-0.00029710,0.00012164,0.00017335,-0.00133478,-0.006
 35081,-0.00910392,0.02923369,0.11750379,-0.00013425,0.00065670,0.00031
 398,0.00071470,-0.00190708,0.00052772,-0.00001348,0.00000836,-0.000232
 29,0.00002422,0.00011208,0.00005132,0.00007243,0.00001987,0.00004355,0
 .00000162,-0.00000617,-0.00001678,-0.00001530,0.00001094,-0.00000959,-
 0.00585111,-0.01209016,-0.02024717,-0.00024030,-0.00002040,0.00010122,
 0.00000904,0.00003515,0.00005105,-0.00001813,-0.00002956,0.00005417,-0
 .00002844,0.00001690,-0.00000189,0.00005974,-0.00011905,0.00016005,0.0
 0088154,0.00498369,-0.00350942,-0.04596530,-0.10740616,-0.23612769,0.0
 0022371,0.00016285,-0.00049545,-0.00004333,0.00008925,-0.00015005,0.00
 000537,0.00000332,0.00000971,-0.00000441,-0.00000349,0.00000108,0.0000
 0239,0.00000233,0.00000193,0.00000030,0.00000803,0.00000353,0.00000317
 ,-0.00000588,0.00000238,0.00045827,-0.00031377,0.00080928,0.00000979,-
 0.00004128,0.00003297,-0.00000149,-0.00001701,0.00000782,-0.00001819,-
 0.00001602,0.00002130,0.00002375,0.00001548,-0.00000632,-0.00010529,0.
 00002995,0.00025646,-0.00040887,-0.00087412,-0.00148028,0.00010085,0.0
 0009639,0.00046091,-0.00018502,0.00142216,0.00282204,0.05027013,0.1161
 1858,0.25791852,0.00003823,-0.00031144,-0.00026010,0.00058451,0.000582
 29,0.00036668,-0.00001405,-0.00010101,-0.00013873,-0.00001253,0.000080
 24,0.00004147,-0.00002527,0.00007909,-0.00000261,-0.00000961,-0.000003
 91,0.00001468,0.00006370,-0.00004016,-0.00000534,0.00223516,-0.0041070
 2,0.00053387,0.00003310,0.00003700,0.00019088,-0.00000268,-0.00001716,
 0.00002369,0.00000778,-0.00001323,-0.00000017,0.00000762,0.00000755,0.
 00000223,-0.00000585,-0.00001740,-0.00000511,-0.00013532,-0.00002112,0
 .00003923,-0.15243824,0.12633609,0.01456058,0.00000778,0.00006015,-0.0
 0004863,0.00037734,-0.00033864,0.00011997,0.00000590,-0.00000531,0.000
 00406,0.00001290,-0.00000507,-0.00001299,-0.00000727,0.00001159,-0.000
 00295,-0.00000396,0.00000352,0.00000312,-0.00000712,0.00001295,-0.0000
 0552,0.00054968,0.00008493,-0.00059531,-0.00000686,0.00000152,-0.00000
 034,0.00000377,0.00000588,-0.00000453,0.00000540,0.00000548,0.00000090
 ,0.00000623,-0.00000678,0.00000127,-0.00005642,0.00010963,0.00003963,0
 .00010605,-0.00030228,-0.00010474,0.00028204,-0.00010482,-0.00044525,-
 0.01844875,0.02384612,0.00323879,0.00497303,-0.00670336,0.00018838,0.1
 6187184,0.00152973,-0.00064231,-0.00003800,-0.00245225,-0.00155980,0.0
 0388925,-0.00118018,0.00061894,-0.00065412,0.00023839,-0.00053857,0.00
 014334,0.00064032,-0.00005481,0.00002734,0.00001070,-0.00003228,0.0000
 0197,-0.00023159,0.00012083,0.00002619,0.01334595,-0.01645554,-0.00130
 992,0.00017747,0.00006395,0.00027709,-0.00016012,0.00005794,-0.0000764
 2,-0.00001653,-0.00004014,-0.00000381,-0.00008520,-0.00002178,0.000021
 69,-0.00002132,0.00001222,0.00003452,-0.00010071,0.00080711,-0.0015605
 7,0.12642760,-0.19956891,-0.01942141,-0.00002557,-0.00003067,0.0000183
 1,0.00015918,0.00006417,-0.00010042,-0.00000326,0.00000973,0.00000695,
 -0.00000337,0.00000971,-0.00000797,0.00002613,0.00000096,-0.00000191,0
 .00002713,-0.00002239,-0.00000411,0.00003536,-0.00002112,-0.00000207,-
 0.00043219,0.00017802,-0.00049026,0.00002471,0.00001371,-0.00002047,-0
 .00002588,-0.00002521,0.00000537,-0.00002097,-0.00001265,0.00000196,-0
 .00004236,-0.00003169,-0.00003915,-0.00007097,0.00005799,0.00009140,-0
 .00037372,0.00015015,-0.00009905,-0.00009511,0.00077494,0.00063216,-0.
 00771692,0.01091885,0.00125318,0.00951118,-0.01171727,-0.00115095,-0.1
 3917418,0.21690449,-0.00119086,0.00129977,0.00070750,0.00192733,0.0020
 1244,-0.00433298,0.00094276,-0.00032490,0.00067048,-0.00019424,0.00039
 551,-0.00018637,-0.00045675,-0.00001691,-0.00002324,-0.00000467,0.0000
 2938,-0.00000969,0.00011968,-0.00005988,-0.00001994,-0.01840262,0.0208
 8694,0.00023847,-0.00025948,-0.00014853,-0.00021460,0.00013471,0.00003
 208,0.00002724,-0.00002074,0.00000821,-0.00000584,0.00001939,0.0000094
 3,0.00001743,0.00005354,-0.00005212,0.00004202,-0.00097001,0.00071991,
 0.00176767,0.01555682,-0.02022010,-0.04934915,0.00008678,0.00010303,-0
 .00017979,-0.00008006,-0.00013785,-0.00004593,0.00000015,-0.00000561,-
 0.00000407,-0.00000662,-0.00000787,0.00000995,-0.00001332,-0.00000696,
 0.00000345,-0.00001607,0.00001960,0.00000095,-0.00002023,0.00000874,0.
 00000863,0.00021272,-0.00077780,0.00106448,-0.00001252,-0.00001498,0.0
 0001688,0.00001375,0.00001034,-0.00000347,0.00000075,0.00000117,0.0000
 1073,0.00001333,-0.00000265,-0.00000191,0.00000594,-0.00007666,-0.0001
 1491,0.00026425,-0.00016935,0.00038420,0.00037245,-0.00042870,-0.00051
 264,0.00052467,-0.00124259,-0.00139720,0.01910386,-0.02041345,-0.00172
 094,-0.01773442,0.01852086,0.05307442,0.00089548,0.00207408,0.00027224
 ,0.00037239,-0.00043448,0.00015384,-0.00019326,0.00026432,-0.00022907,
 0.00002362,-0.00015506,0.00006122,0.00011154,-0.00003331,-0.00000139,0
 .00000218,-0.00000339,-0.00000124,-0.00009230,0.00004242,0.00000060,0.
 00023361,-0.00018918,-0.00017169,0.00837229,0.01039388,-0.01507792,-0.
 00136474,-0.00052296,-0.00419495,-0.00087683,0.00016867,-0.00052093,-0
 .00431270,-0.00331625,-0.00212862,-0.00500290,-0.01657039,0.02401778,-
 0.00014882,0.00001487,-0.00001847,-0.00013877,-0.00005521,-0.00005549,
 -0.08697301,-0.05688772,0.06685852,-0.00000952,0.00007523,0.00002449,-
 0.00000198,0.00000445,0.00000125,-0.00000636,0.00000080,0.00000117,0.0
 0000833,-0.00000392,0.00000039,0.00000646,-0.00000188,-0.00000243,0.00
 001221,-0.00001188,0.00000737,-0.00006663,-0.00012486,0.00006187,0.000
 47002,0.00053016,-0.00080726,-0.00003938,0.00029655,0.00025639,-0.0003
 9859,-0.00087256,0.00112387,0.00040538,0.00152153,0.00032841,-0.000007
 66,-0.00002946,-0.00003480,0.00000948,-0.00000531,-0.00001105,-0.00000
 049,0.00003975,0.00003430,-0.00003804,-0.00002044,-0.00001830,0.000171
 03,-0.00010033,-0.00001649,0.00000185,0.00007856,0.00002972,0.08857613
 ,0.00017392,-0.00288574,-0.00226244,-0.00047002,0.00061603,-0.00040430
 ,0.00035078,0.00036361,0.00039552,0.00004472,-0.00010289,-0.00019504,0
 .00019907,-0.00015924,-0.00001819,0.00001347,-0.00001868,0.00000246,0.
 00002287,0.00005844,0.00003229,-0.00009864,0.00005575,-0.00012816,-0.0
 0284998,-0.00064314,0.00458685,-0.00031951,0.00460787,0.00274214,0.000
 25293,-0.00021542,-0.00053397,-0.00381848,0.00480190,0.00150359,-0.002
 29072,-0.00309167,0.00882064,0.00011837,-0.00003830,0.00000669,-0.0000
 2708,-0.00019574,-0.00024317,-0.05612836,-0.12636472,0.12482972,0.0000
 4916,-0.00004970,0.00027494,-0.00000480,-0.00000390,-0.00000624,0.0000
 0369,0.00000756,0.00000030,0.00000618,0.00000435,0.00000064,0.00001003
 ,-0.00001796,-0.00000795,0.00000048,-0.00000055,-0.00000847,0.00000550
 ,-0.00013809,-0.00041820,-0.00022147,0.00007310,0.00029675,0.00027868,
 -0.00078703,-0.00040817,-0.00015623,-0.00011161,0.00052918,0.00106332,
 -0.00240021,-0.00199660,0.00002817,0.00003985,0.00003154,-0.00000744,0
 .00000814,0.00003326,-0.00000106,-0.00001530,-0.00001317,0.00006900,0.
 00007701,0.00006539,-0.00013871,-0.00021541,0.00020907,0.00000882,0.00
 001144,0.00004950,0.06383333,0.12673024,0.00214520,-0.00139210,0.00020
 587,-0.00093250,-0.00000196,0.00003164,-0.00022003,0.00074548,0.000132
 92,-0.00008440,-0.00045375,0.00002729,0.00008693,-0.00011676,-0.000032
 17,0.00000389,-0.00000410,0.00000009,-0.00005504,0.00003709,-0.0000227
 0,-0.00033039,-0.00018018,-0.00010397,0.00979352,0.01381978,-0.0147154
 8,-0.00484660,0.00233823,-0.00109627,-0.00055332,-0.00060216,-0.000032
 69,-0.00129000,0.00180107,0.00290397,-0.00169789,-0.00127276,0.0040339
 3,0.00019137,0.00000228,-0.00007416,0.00010595,-0.00013519,-0.00018555
 ,0.06555535,0.12446199,-0.21467592,0.00001450,-0.00018081,0.00006496,-
 0.00000350,0.00000297,-0.00000308,-0.00000550,0.00000012,0.00000519,0.
 00000670,-0.00000334,0.00000017,0.00001360,-0.00000494,-0.00000343,0.0
 0001417,-0.00000841,0.00000806,0.00030782,-0.00007727,-0.00054133,0.00
 050193,0.00084166,-0.00075360,0.00024768,-0.00038817,-0.00027441,-0.00
 018442,-0.00000230,0.00007926,0.00111443,-0.00164993,-0.00017727,0.000
 02671,0.00005718,0.00008593,0.00000309,-0.00000010,0.00007185,-0.00000
 906,0.00000080,-0.00001015,0.00007353,0.00009804,0.00007418,-0.0000477
 0,0.00000494,0.00034689,-0.00000269,0.00002903,0.00007817,-0.06994334,
 -0.13776640,0.22455180||0.00000892,-0.00000334,0.00000743,-0.00001036,
 0.00000050,-0.00000098,0.00002750,0.00001305,-0.00000306,-0.00000796,-
 0.00000304,-0.00000442,-0.00003011,-0.00000381,0.00000790,-0.00000133,
 -0.00000377,0.00000065,0.00000597,-0.00000498,-0.00000387,0.00000773,-
 0.00000224,-0.00000697,-0.00000798,-0.00000102,0.00000094,-0.00000654,
 0.00000474,-0.00001245,0.00000069,0.00000358,-0.00000256,0.00000137,0.
 00000480,-0.00000353,-0.00000020,0.00000163,0.00000189,-0.00000143,-0.
 00000068,0.00000168,0.00000101,-0.00000258,0.00000676,-0.00000453,-0.0
 0000364,0.00000231,0.00000739,-0.00000107,0.00000044,-0.00000025,-0.00
 000310,0.00000159,0.00000043,-0.00000226,0.,-0.00000118,-0.00000435,0.
 00000055,-0.00000262,-0.00000209,0.00000027,-0.00000206,-0.00000311,-0
 .00000012,0.00000155,0.00000040,0.00000036,0.00000232,-0.00000041,0.00
 000151,-0.00000311,0.00000078,-0.00000166,-0.00000139,0.00000309,-0.00
 000204,-0.00000083,0.00000417,-0.00000208,0.00000313,-0.00000072,0.000
 00164,0.00000088,-0.00000139,0.00000154,0.00000175,0.00000212,0.000003
 14,0.00000435,0.00000057,0.00000138,0.00000140,0.00000175,-0.00000006,
 0.00000276,0.00000202,0.00000254,0.00000274,0.00000442,-0.00000070|||@


 I (ERNEST RUTHERFORD) CAME INTO THE ROOM, WHICH WAS HALF DARK, AND PRESENTLY
 SPOTTED LORD KELVIN IN THE AUDIENCE AND REALIZED I WAS IN TROUBLE AT
 THE LAST PART OF MY SPEECH DEALING THE AGE OF THE EARTH, WHERE MY VIEWS
 CONFLICTED WITH HIS.  TO MY RELIEF KELVIN FELL FAST ASLEEP, BUT AS I CAME
 TO THE IMPORTANT POINT, I SAW THE OLD BIRD SIT UP AND COCK A BALEFUL GLANCE
 AT ME! THEN A SUDDEN INSPIRATION CAME AND I SAID LORD KELVIN HAD LIMITED
 THE AGE OF THE EARTH PROVIDED NO NEW SOURCE WAS DISCOVERED. THAT
 PROPHETIC UTTERANCE REFERS TO WHAT WE ARE NOW CONSIDERING TONIGHT, RADIUM!
 BEHOLD!  THE OLD BOY BEAMED UPON ME.
 Job cpu time:  0 days 10 hours 48 minutes 13.0 seconds.
 File lengths (MBytes):  RWF=    646 Int=      0 D2E=      0 Chk=     16 Scr=      1
 Normal termination of Gaussian 03 at Mon Jul 15 10:25:35 2019.
